# Supplementary material
Source: HighWire-hosted journal article supplement (https://thorax.bmj.com/content/75/6/449)
Supplement: inline-supplementary-material-2 [file inline-supplementary-material-2.xlsx]

## Sheet: Sheet1
Bronchial Lavage Fluid
Proteomics/NTA Analysis
Age	Gender	Genotype	FEV	Exacerbation	Bacteral Growth	Organism 1	Organism 2/3	BALF %Neutrophils
CF 1-2 yrs
2 yrs	Male	p.Phe508del/p.Phe508del	N/A	No	/	/	/	6
1 yr	Male	p.Phe508del/p.Phe508del	N/A	No	Yes	Normal Flora	Haem. Infleunza	45
1 yr	Female	p.Phe508del/p.Phe508del	N/A	No	No	/	/	2
1 yr	Female	p.Phe508del/p.Phe508del	N/A	No	Yes	Haem. Infleunza	Normal Flora	40
1 yr	Female	p.Phe508del/p.Phe508del	N/A	No	Yes	MRSA	Normal Flora	17
1 yr	Female	p.Phe508del/p.Phe508del	N/A	No	Yes	Haem. Infleunza	Normal Flora	45
1yr	Female	p.Phe508del/p.Phe508del	N/A	No	No	/	/	10
1yr	Male	p.Phe508del/p.Phe508del	N/A	No	Yes	Moraxella (Branhamella) catarrhalis	Achromobacter species	92
1yr	Female	p.Phe508del/G551D	N/A	No	Yes	Haemophilus haemolyticus	Normal Flora	3
CF 5-6 yrs
6 yrs	Male	p.Phe508del/p.Phe508del	N/A	No	Yes	Normal Flora	/	15
5 yrs	Male	p.Phe508del/p.Phe508del	N/A	No	Yes	Staph. Aureus	Strep. Pneumonia	9
5 yrs	Male	p.Phe508del/p.Phe508del	N/A	No	Yes	Normal Flora	Staph. Aureus	UK
6 yrs	Female	p.Phe508del/p.Phe508del	N/A	No	No	/	/	31
5yrs	Female	p.Phe508del/p.Phe508del	N/A	No	Yes	Normal Flora	Other	65
CF 8-11yrs
8 yrs	Female	p.Phe508del/p.Phe508del	N/A	No	No	/	/	UK
8yrs	Female	p.Phe508del/p.Phe508del	N/A	No	Yes	Staph. Aureus	/	UK
8 yrs	Female	p.Phe508del/p.Phe508del	N/A	No	Yes	Staph. Aureus	Haem. Infleunza	UK
11 yrs	Male	p.Phe508del/p.Phe508del	N/A	No	No	/	/	3
CF 18+ years (Adults)
44 yrs	Female	p.Phe508del/p.Phe508del	36	Yes	Yes	Pseud. Aeruginosa	/	UK
23 yrs	Male	p.Phe508del/p.Phe508del	58	Yes	Yes	Pseud. Aeruginosa	/	62
37 yrs	Male	p.Phe508del/p.Phe508del	62	Yes	Yes	Pseud. Aeruginosa	Staph. Aureus	UK
24yrs	Male	p.Phe508del/p.Phe508del	56	Yes	Yes	Staph. Aureus	/	90
29 yrs	Male	p.Phe508del/p.Phe508del	54	Yes	Yes	Pseud. Aeruginosa	/	78
20 yrs	Male	p.Phe508del/p.Phe508del	76	Yes	yes	Staph. Aureus	Pseud. Aeruginosa	UK
19 yrs	Female	p.Phe508del/p.Phe508del	75	Yes	No	/	/	UK
40 yrs	Female	p.Phe508del/p.Phe508del	52	Yes	No	/	/	23
CF PreIvacaftor
5 yrs	Female	p.Gly551Asp/p.Gly551Asp	N/A	No	No	/	/	28
5 yrs	Female	p.Gly551Asp/p.Gly551Asp	N/A	No	Yes	Haem. Infleunza	Normal Flora	13
3 yrs	Female	p.Gly551Asp/p.Phe508del	N/A	No	UK	/	/	64
1 yr	Male	p.Gly551Asp/Other	N/A	No	Yes	Normal Flora	/	3
CF Post Ivacaftor
6 yrs	Female	p.Gly551Asp/p.Gly551Asp	N/A	No	Yes	Haem. Infleunza	Staph. Aureus/Normal Flora	1
6 yrs	Male	p.Gly551Asp/p.Gly551Asp	N/A	No	Yes	Haem. Infleunza	Normal Flora	UK
4 yrs	Male	p.Gly551Asp/p.Phe508del	N/A	No	Yes	Staph. Aureus	Haem. Infleunza/Normal Flora	2
3 yrs	Male	p.Gly551Asp/Other	N/A	No	Yes	Staph. Aureus	Strep. Pneumonia/Normal Flora	7
Control 1-2yrs
2 yrs	Male	N/A	N/A	No	No	/		UK
2 yrs	Female	N/A	N/A	No	No	/		UK
3 yrs	Female	N/A	N/A	No	Yes	Heamophilus inﬂuenzae	Streptococcus constellatus	0
Controls 5-6yrs
6 yrs	Male	N/A	N/A	N/A	No	No
6 yrs	Male	N/A	N/A	N/A	Yes	Staphylococcus aureus	/	UK
6 yrs	Female	N/A	N/A	N/A	Yes	Normal Flora	/	10
6 yrs	Male	N/A	N/A	N/A	Yes	Heamophilus inﬂuenzae	/	1
7 yrs	Male	N/A	N/A	N/A	Yes	Heamophilus inﬂuenzae	Veillonella species	4
Controls 8-11yrs
11 yrs	Female	N/A	N/A	No	Yes	Normal Flora	/	4
8 yrs	Male	N/A	N/A	No	Yes	Normal Flora	/	10
9 yrs	Male	N/A	N/A	No	Yes	Heamophilus inﬂuenzae	/	11
9 yrs	Male	N/A			Yes	Normal Flora	/	6
Controls 18+ yrs
18+	Male	N/A	N/A	No	No	/	/	1
18+	Female	N/A	N/A	No	No	/	/	3
18+	Female	N/A	N/A	No	No	/	/	2
18+	Male	N/A	N/A	No	No	/	/	1
18+	Female	N/A	N/A	No	No	/	/	2
18+	Male	N/A	N/A	No	No	/	/	1
18+	Female	N/A	N/A	No	No	/	/	1
18+	Male	N/A	N/A	No	No	/	/	1
18+	Male	N/A	N/A	No	No	/	/	0
Serum CF
Chemotaxis/Transmigration
3 yrs	Female	p.Phe508del/p.Phe508del	N/A	No	No	/	/
4 yrs	Male	p.Phe508del/p.Phe508del	N/A	No	Yes	Normal Flora	/
3 yrs	Female	p.Phe508del/C.2657+2_2657+3insA	N/A	No	Yes	Haem. Infleunza	Normal Flora
3 yrs	Male	p.Phe508del/p.Gly551Asp	N/A	No	Yes	Normal Flora	/
3 yrs	Female	p.Phe508del/p.Asn1303Lys	N/A	No	Yes	Normal Flora	/
3 yrs	Female	p.Phe508del/p.Phe508del	N/A	No	Yes	Normal Flora	Staph. Aureus/Haem. Infleunza
17 yrs	Female	p.Phe508del/p.Phe508del	89	UK		Normal Flora	/
15 yrs	Male	p.Phe508del/p.Phe508del	62	UK	Yes	Pseud. Aeruginosa	Myco. Absessus/Normal Flora
13 yrs	Male	p.Phe508del/p.Phe508del	78	UK	Yes	Normal Flora	/
Controls Serum -Healthy Adults Volunteers
UK=unknown/Not documented or unsuitable for cell differentiation
