# Supplementary material
Source: HighWire-hosted journal article supplement (https://thorax.bmj.com/content/75/6/449)
Supplement: inline-supplementary-material-4 [file inline-supplementary-material-4.xlsx]

## Sheet: CFBEEVs
Protein IDs	Peptides delta1	Peptides delta2	Peptides delta3	Mol. weight [kDa]	Score	Sequence coverage delta1 [%]	Sequence coverage delta2 [%]	Sequence coverage delta3 [%]
sp|P02751|FINC_HUMANFibronectinOS=HomosapiensGN=FN1PE=1SV=4;tr|H0Y7Z1|H0Y7Z1_HUMANFibronectin(Fragment)OS=HomosapiensGN=FN1PE=1SV=1;tr|H0Y4K8|H0Y4K8_HUMANFibronectin(Fragment)OS=HomosapiensGN=FN1PE=1SV=1	64	72	60	262.62	323.31	38.1	39.9	35.6
tr|Q5HY54|Q5HY54_HUMANFilamin-AOS=HomosapiensGN=FLNAPE=1SV=1;tr|Q60FE5|Q60FE5_HUMANFilamin-AOS=HomosapiensGN=FLNAPE=1SV=1;sp|P21333|FLNA_HUMANFilamin-AOS=HomosapiensGN=FLNAPE=1SV=4;tr|A0A087WWY3|A0A087WWY3_HUMANFilamin-AOS=HomosapiensGN=FLNAPE=1SV=1;tr|F8WE98|F8WE98_HUMANFilamin-A(Fragment)OS=HomosapiensGN=FLNAPE=1SV=2;sp|Q14315|FLNC_HUMANFilamin-COS=HomosapiensGN=FLNCPE=1SV=3;tr|H0Y5F3|H0Y5F3_HU…	32	39	26	276.55	323.31	15.6	18.5	11.3
sp|Q9Y490|TLN1_HUMANTalin-1OS=HomosapiensGN=TLN1PE=1SV=3;sp|Q9Y4G6|TLN2_HUMANTalin-2OS=HomosapiensGN=TLN2PE=1SV=4;tr|A0A1B0GVU7|A0A1B0GVU7_HUMANTalin-2OS=HomosapiensGN=TLN2PE=1SV=1;tr|H0YMT1|H0YMT1_HUMANTalin-2(Fragment)OS=HomosapiensGN=TLN2PE=1SV=1	30	53	45	269.76	323.31	16.7	27.8	24
sp|P68366|TBA4A_HUMANTubulinalpha-4AchainOS=HomosapiensGN=TUBA4APE=1SV=1;tr|C9JEV8|C9JEV8_HUMANTubulinalphachain(Fragment)OS=HomosapiensGN=TUBA4APE=1SV=1;tr|C9JQ00|C9JQ00_HUMANTubulinalphachain(Fragment)OS=HomosapiensGN=TUBA4APE=1SV=1;tr|C9JJQ8|C9JJQ8_HUMANTubulinalphachain(Fragment)OS=HomosapiensGN=TUBA4APE=1SV=1;tr|C9JDL2|C9JDL2_HUMANTubulinalpha-4Achain(Fragment)OS=HomosapiensGN=TUBA4APE=1SV=8	27	25	26	49.924	139.87	63.8	62.1	58.5
sp|Q00610|CLH1_HUMANClathrinheavychain1OS=HomosapiensGN=CLTCPE=1SV=5;tr|A0A087WVQ6|A0A087WVQ6_HUMANClathrinheavychainOS=HomosapiensGN=CLTCPE=1SV=1;tr|J3KS13|J3KS13_HUMANClathrinheavychain1OS=HomosapiensGN=CLTCPE=1SV=1;tr|A0A087WX41|A0A087WX41_HUMANClathrinheavychain2OS=HomosapiensGN=CLTCL1PE=1SV=1;sp|P53675|CLH2_HUMANClathrinheavychain2OS=HomosapiensGN=CLTCL1PE=1SV=2;tr|K7EJJ5|K7EJJ5_HUMANClathri…	25	36	28	191.61	323.31	19.6	26	22.7
sp|P35579|MYH9_HUMANMyosin-9OS=HomosapiensGN=MYH9PE=1SV=4;sp|P35749|MYH11_HUMANMyosin-11OS=HomosapiensGN=MYH11PE=1SV=3;tr|Q5BKV1|Q5BKV1_HUMANMYH9proteinOS=HomosapiensGN=MYH9PE=1SV=1;tr|B1AH99|B1AH99_HUMANMyosin-9(Fragment)OS=HomosapiensGN=MYH9PE=1SV=1;sp|Q7Z406|MYH14_HUMANMyosin-14OS=HomosapiensGN=MYH14PE=1SV=2;tr|A0A0C4DFM8|A0A0C4DFM8_HUMANMyosin-14OS=HomosapiensGN=MYH14PE=1SV=1;tr|A1L2Z2|A1L2Z2…	24	37	28	226.53	323.31	14.2	23.2	19.3
tr|Q5JP53|Q5JP53_HUMANTubulinbetachainOS=HomosapiensGN=TUBBPE=1SV=1;sp|P07437|TBB5_HUMANTubulinbetachainOS=HomosapiensGN=TUBBPE=1SV=2;tr|Q5ST81|Q5ST81_HUMANTubulinbetachainOS=HomosapiensGN=TUBBPE=1SV=1;tr|G3V5W4|G3V5W4_HUMANTubulinbeta-3chainOS=HomosapiensGN=TUBB3PE=1SV=1;tr|G3V2R8|G3V2R8_HUMANHCG1983504,isoformCRA_eOS=HomosapiensGN=TUBB3PE=1SV=1;tr|G3V3R4|G3V3R4_HUMANHCG1983504,isoformCRA_cOS=Ho…	23	22	23	47.766	120.12	60.1	61.5	55.2
sp|P60709|ACTB_HUMANActin,cytoplasmic1OS=HomosapiensGN=ACTBPE=1SV=1;tr|G5E9R0|G5E9R0_HUMANActin,cytoplasmic1OS=HomosapiensGN=ACTBPE=1SV=1;tr|E7EVS6|E7EVS6_HUMANActin,cytoplasmic1(Fragment)OS=HomosapiensGN=ACTBPE=1SV=8;tr|C9JZR7|C9JZR7_HUMANActin,cytoplasmic1(Fragment)OS=HomosapiensGN=ACTBPE=1SV=8;tr|C9JTX5|C9JTX5_HUMANActin,cytoplasmic1(Fragment)OS=HomosapiensGN=ACTBPE=1SV=1;tr|C9JUM1|C9JUM1_HUMA…	23	24	25	41.736	323.31	67.5	75.2	73.1
sp|P63261|ACTG_HUMANActin,cytoplasmic2OS=HomosapiensGN=ACTG1PE=1SV=1;tr|I3L3I0|I3L3I0_HUMANActin,cytoplasmic2(Fragment)OS=HomosapiensGN=ACTG1PE=1SV=1;tr|I3L1U9|I3L1U9_HUMANActin,cytoplasmic2(Fragment)OS=HomosapiensGN=ACTG1PE=1SV=1;tr|I3L4N8|I3L4N8_HUMANActin,cytoplasmic2(Fragment)OS=HomosapiensGN=ACTG1PE=1SV=8;tr|K7EM38|K7EM38_HUMANActin,cytoplasmic2(Fragment)OS=HomosapiensGN=ACTG1PE=1SV=1;tr|I3L…	23	24	25	41.792	47.37	67.5	75.2	73.1
sp|P07996|TSP1_HUMANThrombospondin-1OS=HomosapiensGN=THBS1PE=1SV=2;tr|A8MZG1|A8MZG1_HUMANThrombospondin-1(Fragment)OS=HomosapiensGN=THBS1PE=1SV=1;sp|P35442|TSP2_HUMANThrombospondin-2OS=HomosapiensGN=THBS2PE=1SV=2	23	26	32	129.38	323.31	23.9	25	28.1
sp|P68363|TBA1B_HUMANTubulinalpha-1BchainOS=HomosapiensGN=TUBA1BPE=1SV=1;tr|F8VVB9|F8VVB9_HUMANTubulinalpha-1Bchain(Fragment)OS=HomosapiensGN=TUBA1BPE=1SV=8;tr|F8VRZ4|F8VRZ4_HUMANTubulinalpha-1Achain(Fragment)OS=HomosapiensGN=TUBA1APE=3SV=1;tr|F8VS66|F8VS66_HUMANTubulinalpha-1CchainOS=HomosapiensGN=TUBA1CPE=4SV=1;tr|F8VWV9|F8VWV9_HUMANTubulinalpha-1Bchain(Fragment)OS=HomosapiensGN=TUBA1BPE=1SV=1;…	22	23	22	50.151	323.31	59.9	60.5	57.6
sp|P68371|TBB4B_HUMANTubulinbeta-4BchainOS=HomosapiensGN=TUBB4BPE=1SV=1;sp|P04350|TBB4A_HUMANTubulinbeta-4AchainOS=HomosapiensGN=TUBB4APE=1SV=2;tr|M0R2D3|M0R2D3_HUMANTubulinbeta-4Achain(Fragment)OS=HomosapiensGN=TUBB4APE=1SV=1;sp|A6NNZ2|TBB8L_HUMANTubulinbeta-8chain-likeproteinLOC260334OS=HomosapiensPE=1SV=1;tr|M0QY85|M0QY85_HUMANTubulinbeta-4Achain(Fragment)OS=HomosapiensGN=TUBB4APE=1SV=1;tr|M0R…	22	22	23	49.83	323.31	55.7	59.3	57.1
sp|Q71U36|TBA1A_HUMANTubulinalpha-1AchainOS=HomosapiensGN=TUBA1APE=1SV=1;sp|Q13748|TBA3C_HUMANTubulinalpha-3C/DchainOS=HomosapiensGN=TUBA3CPE=1SV=3;sp|Q6PEY2|TBA3E_HUMANTubulinalpha-3EchainOS=HomosapiensGN=TUBA3EPE=1SV=2;tr|F8VQQ4|F8VQQ4_HUMANTubulinalphachain(Fragment)OS=HomosapiensGN=TUBA1APE=1SV=1;tr|V9GZ17|V9GZ17_HUMANTubulinalpha-8chain(Fragment)OS=HomosapiensGN=TUBA8PE=1SV=1	20	21	19	50.135	16.989	56.5	57.4	51.4
sp|P68133|ACTS_HUMANActin,alphaskeletalmuscleOS=HomosapiensGN=ACTA1PE=1SV=1;sp|P68032|ACTC_HUMANActin,alphacardiacmuscle1OS=HomosapiensGN=ACTC1PE=1SV=1;tr|A6NL76|A6NL76_HUMANActin,alphaskeletalmuscleOS=HomosapiensGN=ACTA1PE=1SV=3;sp|P63267|ACTH_HUMANActin,gamma-entericsmoothmuscleOS=HomosapiensGN=ACTG2PE=1SV=1;sp|P62736|ACTA_HUMANActin,aorticsmoothmuscleOS=HomosapiensGN=ACTA2PE=1SV=1;tr|F8WB63|F8…	18	16	19	42.051	99.739	34	34	37.1
sp|P04264|K2C1_HUMANKeratin,typeIIcytoskeletal1OS=HomosapiensGN=KRT1PE=1SV=6;CON__P04264	17	22	13	66.038	312.46	27.2	32	19.1
sp|Q9BVA1|TBB2B_HUMANTubulinbeta-2BchainOS=HomosapiensGN=TUBB2BPE=1SV=1;sp|Q13885|TBB2A_HUMANTubulinbeta-2AchainOS=HomosapiensGN=TUBB2APE=1SV=1	16	15	16	49.953	-2	39.8	39.3	37.1
sp|P13746|1A11_HUMANHLAclassIhistocompatibilityantigen,A-11alphachainOS=HomosapiensGN=HLA-APE=1SV=1;tr|Q5SRN7|Q5SRN7_HUMANHLAclassIhistocompatibilityantigen,A-3alphachainOS=HomosapiensGN=HLA-APE=1SV=2;tr|A0A1W2PS24|A0A1W2PS24_HUMANHLAclassIhistocompatibilityantigen,A-3alphachainOS=HomosapiensGN=HLA-APE=1SV=1;sp|P04439|1A03_HUMANHLAclassIhistocompatibilityantigen,A-3alphachainOS=HomosapiensGN=HLA-…	15	14	10	40.936	232.16	51.5	37.3	31.2
sp|P30453|1A34_HUMANHLAclassIhistocompatibilityantigen,A-34alphachainOS=HomosapiensGN=HLA-APE=1SV=1;sp|P30457|1A66_HUMANHLAclassIhistocompatibilityantigen,A-66alphachainOS=HomosapiensGN=HLA-APE=1SV=1;sp|P10316|1A69_HUMANHLAclassIhistocompatibilityantigen,A-69alphachainOS=HomosapiensGN=HLA-APE=1SV=2;sp|P01891|1A68_HUMANHLAclassIhistocompatibilityantigen,A-68alphachainOS=HomosapiensGN=HLA-APE=1SV=4…	14	12	10	41.054	90.678	40.8	37.8	26.6
sp|Q08380|LG3BP_HUMANGalectin-3-bindingproteinOS=HomosapiensGN=LGALS3BPPE=1SV=1;tr|K7EP36|K7EP36_HUMANGalectin-3-bindingprotein(Fragment)OS=HomosapiensGN=LGALS3BPPE=1SV=1;tr|K7ESM3|K7ESM3_HUMANGalectin-3-bindingprotein(Fragment)OS=HomosapiensGN=LGALS3BPPE=1SV=1;tr|K7EKQ5|K7EKQ5_HUMANGalectin-3-bindingproteinOS=HomosapiensGN=LGALS3BPPE=1SV=1;tr|K7ERZ6|K7ERZ6_HUMANGalectin-3-bindingproteinOS=Homosa…	14	17	17	65.33	323.31	28	37.4	37.4
sp|Q13418|ILK_HUMANIntegrin-linkedproteinkinaseOS=HomosapiensGN=ILKPE=1SV=2;tr|A0A0A0MTH3|A0A0A0MTH3_HUMANIntegrin-linkedproteinkinaseOS=HomosapiensGN=ILKPE=1SV=1;tr|A0A087WWY6|A0A087WWY6_HUMANIntegrin-linkedproteinkinase(Fragment)OS=HomosapiensGN=ILKPE=1SV=1;tr|E9PQ52|E9PQ52_HUMANIntegrin-linkedproteinkinaseOS=HomosapiensGN=ILKPE=1SV=1;tr|A0A087WW45|A0A087WW45_HUMANIntegrin-linkedproteinkinaseOS…	13	21	17	51.419	197.86	37.8	48	41.6
sp|P05106|ITB3_HUMANIntegrinbeta-3OS=HomosapiensGN=ITGB3PE=1SV=2;tr|H3BM21|H3BM21_HUMANIntegrinbeta(Fragment)OS=HomosapiensPE=3SV=1;tr|I3L4X8|I3L4X8_HUMANIntegrinbetaOS=HomosapiensGN=ITGB3PE=3SV=1	13	15	18	87.057	271.3	17.4	20.7	22.7
sp|P30508|1C12_HUMANHLAclassIhistocompatibilityantigen,Cw-12alphachainOS=HomosapiensGN=HLA-CPE=1SV=2;sp|Q07000|1C15_HUMANHLAclassIhistocompatibilityantigen,Cw-15alphachainOS=HomosapiensGN=HLA-CPE=1SV=1;tr|A0A1W2PRZ0|A0A1W2PRZ0_HUMANHLAclassIhistocompatibilityantigen,Cw-6alphachainOS=HomosapiensGN=HLA-CPE=1SV=1;tr|A0A140T937|A0A140T937_HUMANHLAclassIhistocompatibilityantigen,Cw-6alphachainOS=Homos…	12	9	8	40.885	7.4872	38	26.8	21.3
sp|P04406|G3P_HUMANGlyceraldehyde-3-phosphatedehydrogenaseOS=HomosapiensGN=GAPDHPE=1SV=3;tr|E7EUT5|E7EUT5_HUMANGlyceraldehyde-3-phosphatedehydrogenaseOS=HomosapiensGN=GAPDHPE=1SV=1;sp|O14556|G3PT_HUMANGlyceraldehyde-3-phosphatedehydrogenase,testis-specificOS=HomosapiensGN=GAPDHSPE=1SV=2	12	13	12	36.053	280.87	43	42.4	43.6
sp|Q07954|LRP1_HUMANProlow-densitylipoproteinreceptor-relatedprotein1OS=HomosapiensGN=LRP1PE=1SV=2;tr|H0YJI8|H0YJI8_HUMANProlow-densitylipoproteinreceptor-relatedprotein1(Fragment)OS=HomosapiensGN=LRP1PE=1SV=1;tr|Q6PJ72|Q6PJ72_HUMANLRP1proteinOS=HomosapiensGN=LRP1PE=1SV=1	12	19	27	504.6	244.27	3.2	4.9	6.8
tr|A0A140TA49|A0A140TA49_HUMANComplementC4-AOS=HomosapiensGN=C4APE=1SV=1;tr|A0A140TA44|A0A140TA44_HUMANComplementC4-AOS=HomosapiensGN=C4APE=1SV=1;tr|A0A140TA32|A0A140TA32_HUMANComplementC4-AOS=HomosapiensGN=C4APE=1SV=1;tr|A0A0G2JPR0|A0A0G2JPR0_HUMANComplementC4-AOS=HomosapiensGN=C4APE=1SV=1;sp|P0C0L4|CO4A_HUMANComplementC4-AOS=HomosapiensGN=C4APE=1SV=2;tr|F5GXS0|F5GXS0_HUMANComplementC4-BOS=Homos…	11	7	6	187.79	39.619	6.4	4.4	4.7
sp|P16190|1A33_HUMANHLAclassIhistocompatibilityantigen,A-33alphachainOS=HomosapiensGN=HLA-APE=1SV=3	11	11	7	40.891	23.106	37.8	35.9	22.5
sp|P30462|1B14_HUMANHLAclassIhistocompatibilityantigen,B-14alphachainOS=HomosapiensGN=HLA-BPE=1SV=1;sp|P30480|1B42_HUMANHLAclassIhistocompatibilityantigen,B-42alphachainOS=HomosapiensGN=HLA-BPE=1SV=1;sp|P30466|1B18_HUMANHLAclassIhistocompatibilityantigen,B-18alphachainOS=HomosapiensGN=HLA-BPE=1SV=1;sp|P01889|1B07_HUMANHLAclassIhistocompatibilityantigen,B-7alphachainOS=HomosapiensGN=HLA-BPE=1SV=3;…	11	9	9	40.358	22.678	34	29.8	28.7
sp|P30685|1B35_HUMANHLAclassIhistocompatibilityantigen,B-35alphachainOS=HomosapiensGN=HLA-BPE=1SV=1;sp|P30491|1B53_HUMANHLAclassIhistocompatibilityantigen,B-53alphachainOS=HomosapiensGN=HLA-BPE=1SV=1;sp|P10319|1B58_HUMANHLAclassIhistocompatibilityantigen,B-58alphachainOS=HomosapiensGN=HLA-BPE=1SV=1;sp|P30481|1B44_HUMANHLAclassIhistocompatibilityantigen,B-44alphachainOS=HomosapiensGN=HLA-BPE=1SV=1…	11	9	10	40.455	109.77	37	33.7	31.2
sp|Q29940|1B59_HUMANHLAclassIhistocompatibilityantigen,B-59alphachainOS=HomosapiensGN=HLA-BPE=1SV=1;sp|P30493|1B55_HUMANHLAclassIhistocompatibilityantigen,B-55alphachainOS=HomosapiensGN=HLA-BPE=1SV=1;sp|P30492|1B54_HUMANHLAclassIhistocompatibilityantigen,B-54alphachainOS=HomosapiensGN=HLA-BPE=1SV=1;sp|P30495|1B56_HUMANHLAclassIhistocompatibilityantigen,B-56alphachainOS=HomosapiensGN=HLA-BPE=1SV=1…	11	9	10	40.584	7.9028	32.9	29.8	31.5
sp|P0DMV9|HS71B_HUMANHeatshock70kDaprotein1BOS=HomosapiensGN=HSPA1BPE=1SV=1;sp|P0DMV8|HS71A_HUMANHeatshock70kDaprotein1AOS=HomosapiensGN=HSPA1APE=1SV=1;tr|A0A0G2JIW1|A0A0G2JIW1_HUMANHeatshock70kDaprotein1BOS=HomosapiensGN=HSPA1BPE=1SV=1;tr|V9GZ37|V9GZ37_HUMANHeatshock70kDaprotein1AOS=HomosapiensGN=HSPA1APE=1SV=1	10	9	9	70.051	96.897	15.4	17.6	15.4
sp|P14618|KPYM_HUMANPyruvatekinasePKMOS=HomosapiensGN=PKMPE=1SV=4;tr|B4DNK4|B4DNK4_HUMANPyruvatekinaseOS=HomosapiensGN=PKMPE=1SV=1;tr|H3BQ34|H3BQ34_HUMANPyruvatekinaseOS=HomosapiensGN=PKMPE=1SV=1;tr|H3BT25|H3BT25_HUMANPyruvatekinasePKM(Fragment)OS=HomosapiensGN=PKMPE=1SV=1;tr|H3BUW1|H3BUW1_HUMANPyruvatekinasePKM(Fragment)OS=HomosapiensGN=PKMPE=1SV=1;tr|H3BTJ2|H3BTJ2_HUMANPyruvatekinasePKM(Fragmen…	10	10	10	57.936	238.64	32	28.8	28.4
sp|P05556|ITB1_HUMANIntegrinbeta-1OS=HomosapiensGN=ITGB1PE=1SV=2;tr|C9JPK5|C9JPK5_HUMANIntegrinbeta-1(Fragment)OS=HomosapiensGN=ITGB1PE=1SV=1;tr|H7C4N8|H7C4N8_HUMANIntegrinbeta-1(Fragment)OS=HomosapiensGN=ITGB1PE=1SV=1;tr|Q5T3E6|Q5T3E6_HUMANIntegrinbeta-1(Fragment)OS=HomosapiensGN=ITGB1PE=1SV=1;tr|E9PLR6|E9PLR6_HUMANIntegrinbeta-1(Fragment)OS=HomosapiensGN=ITGB1PE=1SV=1;tr|E7EUI6|E7EUI6_HUMANInte…	10	13	10	88.414	154.4	15.9	17.9	14.5
sp|P01023|A2MG_HUMANAlpha-2-macroglobulinOS=HomosapiensGN=A2MPE=1SV=3	10	12	11	163.29	18.375	7.6	8.9	8.1
tr|F8VZY9|F8VZY9_HUMANKeratin,typeIcytoskeletal18OS=HomosapiensGN=KRT18PE=1SV=1;sp|P05783|K1C18_HUMANKeratin,typeIcytoskeletal18OS=HomosapiensGN=KRT18PE=1SV=2;CON__H-INV:HIT000015463;tr|C4AM86|C4AM86_HUMANKeratin,typeIcuticularHa5OS=HomosapiensGN=KRT35PE=1SV=1;CON__Q92764;sp|Q92764|KRT35_HUMANKeratin,typeIcuticularHa5OS=HomosapiensGN=KRT35PE=1SV=5;CON__Q497I4	9	9	5	43.774	105.19	26.9	26.9	14.3
tr|H3BTN5|H3BTN5_HUMANPyruvatekinase(Fragment)OS=HomosapiensGN=PKMPE=1SV=1	9	9	8	53.045	12.225	31.5	25.6	23.1
sp|P62805|H4_HUMANHistoneH4OS=HomosapiensGN=HIST1H4APE=1SV=2	9	7	9	11.367	136.39	53.4	52.4	56.3
tr|H9KV75|H9KV75_HUMANAlpha-actinin-1OS=HomosapiensGN=ACTN1PE=1SV=1;sp|P12814|ACTN1_HUMANAlpha-actinin-1OS=HomosapiensGN=ACTN1PE=1SV=2;sp|O43707|ACTN4_HUMANAlpha-actinin-4OS=HomosapiensGN=ACTN4PE=1SV=2;tr|H7C5W8|H7C5W8_HUMANAlpha-actinin-1(Fragment)OS=HomosapiensGN=ACTN1PE=1SV=1;tr|H0YJ11|H0YJ11_HUMANAlpha-actinin-1(Fragment)OS=HomosapiensGN=ACTN1PE=1SV=1;tr|G3V2W4|G3V2W4_HUMANAlpha-actinin-1(Fra…	9	12	9	94.825	104.51	12.2	17.4	12.9
sp|Q08431|MFGM_HUMANLactadherinOS=HomosapiensGN=MFGE8PE=1SV=2;tr|F5GZN3|F5GZN3_HUMANLactadherinOS=HomosapiensGN=MFGE8PE=1SV=1;tr|X6R3G6|X6R3G6_HUMANLactadherinOS=HomosapiensGN=MFGE8PE=1SV=1;tr|H0YKS8|H0YKS8_HUMANLactadherin(Fragment)OS=HomosapiensGN=MFGE8PE=1SV=1;tr|A0A087WUV5|A0A087WUV5_HUMANLactadherin(Fragment)OS=HomosapiensGN=MFGE8PE=1SV=1	9	15	12	43.122	190.32	32.6	54.3	42.6
sp|P11142|HSP7C_HUMANHeatshockcognate71kDaproteinOS=HomosapiensGN=HSPA8PE=1SV=1;tr|E9PKE3|E9PKE3_HUMANHeatshockcognate71kDaproteinOS=HomosapiensGN=HSPA8PE=1SV=1;tr|E9PN89|E9PN89_HUMANHeatshockcognate71kDaprotein(Fragment)OS=HomosapiensGN=HSPA8PE=1SV=1;tr|E9PNE6|E9PNE6_HUMANHeatshockcognate71kDaproteinOS=HomosapiensGN=HSPA8PE=1SV=1;sp|P54652|HSP72_HUMANHeatshock-related70kDaprotein2OS=HomosapiensG…	9	17	13	70.897	167.01	16.3	29.6	21.4
sp|P01024|CO3_HUMANComplementC3OS=HomosapiensGN=C3PE=1SV=2	8	8	4	187.15	17.8	5.1	5.1	2.5
sp|P37802|TAGL2_HUMANTransgelin-2OS=HomosapiensGN=TAGLN2PE=1SV=3;tr|X6RJP6|X6RJP6_HUMANTransgelin-2(Fragment)OS=HomosapiensGN=TAGLN2PE=1SV=1;tr|C9J5W6|C9J5W6_HUMANTransgelin-3OS=HomosapiensGN=TAGLN3PE=1SV=1;sp|Q9UI15|TAGL3_HUMANTransgelin-3OS=HomosapiensGN=TAGLN3PE=1SV=2	8	8	4	22.391	143.24	49.2	49.2	29.1
sp|P21589|5NTD_HUMAN5'-nucleotidaseOS=HomosapiensGN=NT5EPE=1SV=1;tr|Q96B60|Q96B60_HUMAN5'-nucleotidaseOS=HomosapiensGN=NT5EPE=1SV=1;tr|H0Y3X5|H0Y3X5_HUMAN5'-nucleotidase(Fragment)OS=HomosapiensGN=NT5EPE=1SV=1;tr|H0Y7R7|H0Y7R7_HUMAN5'-nucleotidase(Fragment)OS=HomosapiensGN=NT5EPE=1SV=1	8	9	7	63.367	109.46	17.6	19.7	14.8
sp|P26006|ITA3_HUMANIntegrinalpha-3OS=HomosapiensGN=ITGA3PE=1SV=5;tr|K7EMU3|K7EMU3_HUMANIntegrinalpha-3(Fragment)OS=HomosapiensGN=ITGA3PE=1SV=1;tr|H0YA32|H0YA32_HUMANIntegrinalpha-3(Fragment)OS=HomosapiensGN=ITGA3PE=1SV=1;tr|D6R9X8|D6R9X8_HUMANIntegrinalpha-3OS=HomosapiensGN=ITGA3PE=1SV=2;tr|H0YA49|H0YA49_HUMANIntegrinalpha-3(Fragment)OS=HomosapiensGN=ITGA3PE=1SV=1	8	12	9	116.61	122.68	8.5	12.1	8.4
tr|H0YMD0|H0YMD0_HUMANAnnexin(Fragment)OS=HomosapiensGN=ANXA2PE=1SV=1;tr|H0YMU9|H0YMU9_HUMANAnnexinOS=HomosapiensGN=ANXA2PE=1SV=1;tr|H0YN42|H0YN42_HUMANAnnexin(Fragment)OS=HomosapiensGN=ANXA2PE=1SV=1;sp|P07355|ANXA2_HUMANAnnexinA2OS=HomosapiensGN=ANXA2PE=1SV=2;tr|H0YNP5|H0YNP5_HUMANAnnexin(Fragment)OS=HomosapiensGN=ANXA2PE=1SV=1;tr|H0YKS4|H0YKS4_HUMANAnnexin(Fragment)OS=HomosapiensGN=ANXA2PE=1SV=…	7	2	3	25.341	70.218	33.5	7.9	11.9
sp|P04259|K2C6B_HUMANKeratin,typeIIcytoskeletal6BOS=HomosapiensGN=KRT6BPE=1SV=5;sp|P48668|K2C6C_HUMANKeratin,typeIIcytoskeletal6COS=HomosapiensGN=KRT6CPE=1SV=3;sp|P02538|K2C6A_HUMANKeratin,typeIIcytoskeletal6AOS=HomosapiensGN=KRT6APE=1SV=3;CON__P48668;CON__P04259;CON__P02538;sp|P13647|K2C5_HUMANKeratin,typeIIcytoskeletal5OS=HomosapiensGN=KRT5PE=1SV=3;CON__P13647;tr|F8W0C6|F8W0C6_HUMANKeratin,type…	7	6	5	60.066	7.4011	9.6	9.9	8.7
sp|P61224|RAP1B_HUMANRas-relatedproteinRap-1bOS=HomosapiensGN=RAP1BPE=1SV=1;tr|F5H823|F5H823_HUMANRas-relatedproteinRap-1b(Fragment)OS=HomosapiensGN=RAP1BPE=1SV=1;tr|B7ZB78|B7ZB78_HUMANRas-relatedproteinRap-1bOS=HomosapiensGN=RAP1BPE=1SV=1;tr|F5GZG1|F5GZG1_HUMANRas-relatedproteinRap-1b(Fragment)OS=HomosapiensGN=RAP1BPE=1SV=8;tr|E7ESV4|E7ESV4_HUMANRas-relatedproteinRap-1b(Fragment)OS=HomosapiensGN…	7	7	5	20.825	142.64	37	38.6	28.8
tr|E7EMF1|E7EMF1_HUMANIntegrinalpha-2OS=HomosapiensGN=ITGA2PE=1SV=1;tr|E7ESP4|E7ESP4_HUMANIntegrinalpha-2OS=HomosapiensGN=ITGA2PE=1SV=1;tr|E9PB77|E9PB77_HUMANIntegrinalpha-2OS=HomosapiensGN=ITGA2PE=1SV=1	7	8	5	88.561	93.737	11.8	13.1	8.5
sp|P17066|HSP76_HUMANHeatshock70kDaprotein6OS=HomosapiensGN=HSPA6PE=1SV=2;sp|P48741|HSP77_HUMANPutativeheatshock70kDaprotein7OS=HomosapiensGN=HSPA7PE=5SV=2	7	7	6	71.027	13.211	12.6	13.4	11.5
sp|P09758|TACD2_HUMANTumor-associatedcalciumsignaltransducer2OS=HomosapiensGN=TACSTD2PE=1SV=3	7	8	6	35.709	111.14	22.3	24.5	22.9
sp|P02771|FETA_HUMANAlpha-fetoproteinOS=HomosapiensGN=AFPPE=1SV=1;tr|J3KMX3|J3KMX3_HUMANAlpha-fetoproteinOS=HomosapiensGN=AFPPE=1SV=1	7	9	9	68.677	6.7276	8.9	9	9
sp|Q14204|DYHC1_HUMANCytoplasmicdynein1heavychain1OS=HomosapiensGN=DYNC1H1PE=1SV=5;tr|H0YJ21|H0YJ21_HUMANCytoplasmicdynein1heavychain1(Fragment)OS=HomosapiensGN=DYNC1H1PE=1SV=1	7	18	17	532.4	159.96	2	5.2	5
sp|P05023|AT1A1_HUMANSodium/potassium-transportingATPasesubunitalpha-1OS=HomosapiensGN=ATP1A1PE=1SV=1;tr|M0R116|M0R116_HUMANSodium/potassium-transportingATPasesubunitalphaOS=HomosapiensGN=ATP1A3PE=1SV=1;sp|P13637|AT1A3_HUMANSodium/potassium-transportingATPasesubunitalpha-3OS=HomosapiensGN=ATP1A3PE=1SV=3;tr|A0A0A0MT26|A0A0A0MT26_HUMANSodium/potassium-transportingATPasesubunitalpha-3OS=HomosapiensG…	6	3	3	112.89	35.286	5.8	3.4	3
sp|P08758|ANXA5_HUMANAnnexinA5OS=HomosapiensGN=ANXA5PE=1SV=2;tr|E9PHT9|E9PHT9_HUMANAnnexinOS=HomosapiensGN=ANXA5PE=1SV=1;tr|D6RBL5|D6RBL5_HUMANAnnexinOS=HomosapiensGN=ANXA5PE=1SV=1;tr|D6RBE9|D6RBE9_HUMANAnnexinOS=HomosapiensGN=ANXA5PE=1SV=1	6	4	3	35.936	54.289	18.4	14.4	10.9
sp|Q14764|MVP_HUMANMajorvaultproteinOS=HomosapiensGN=MVPPE=1SV=4;tr|H3BUK7|H3BUK7_HUMANMajorvaultprotein(Fragment)OS=HomosapiensGN=MVPPE=1SV=1;tr|H3BNF6|H3BNF6_HUMANMajorvaultprotein(Fragment)OS=HomosapiensGN=MVPPE=1SV=1;tr|H3BRL2|H3BRL2_HUMANMajorvaultprotein(Fragment)OS=HomosapiensGN=MVPPE=1SV=8;tr|H3BQK6|H3BQK6_HUMANMajorvaultprotein(Fragment)OS=HomosapiensGN=MVPPE=1SV=1;tr|H3BP76|H3BP76_HUMAN…	6	6	3	99.326	49.692	8.1	7.7	3.7
sp|Q99878|H2A1J_HUMANHistoneH2Atype1-JOS=HomosapiensGN=HIST1H2AJPE=1SV=3;sp|Q96KK5|H2A1H_HUMANHistoneH2Atype1-HOS=HomosapiensGN=HIST1H2AHPE=1SV=3;sp|Q9BTM1|H2AJ_HUMANHistoneH2A.JOS=HomosapiensGN=H2AFJPE=1SV=1;sp|Q16777|H2A2C_HUMANHistoneH2Atype2-COS=HomosapiensGN=HIST2H2ACPE=1SV=4;sp|Q6FI13|H2A2A_HUMANHistoneH2Atype2-AOS=HomosapiensGN=HIST2H2AA3PE=1SV=3;sp|P0C0S8|H2A1_HUMANHistoneH2Atype1OS=Homos…	6	3	4	13.936	77.878	41.4	30.5	35.9
sp|P30501|1C02_HUMANHLAclassIhistocompatibilityantigen,Cw-2alphachainOS=HomosapiensGN=HLA-CPE=1SV=1	6	5	4	41.094	9.0321	23.2	16.7	14.2
sp|Q99879|H2B1M_HUMANHistoneH2Btype1-MOS=HomosapiensGN=HIST1H2BMPE=1SV=3;sp|Q99877|H2B1N_HUMANHistoneH2Btype1-NOS=HomosapiensGN=HIST1H2BNPE=1SV=3;sp|Q93079|H2B1H_HUMANHistoneH2Btype1-HOS=HomosapiensGN=HIST1H2BHPE=1SV=3;sp|Q5QNW6|H2B2F_HUMANHistoneH2Btype2-FOS=HomosapiensGN=HIST2H2BFPE=1SV=3;sp|P62807|H2B1C_HUMANHistoneH2Btype1-C/E/F/G/IOS=HomosapiensGN=HIST1H2BCPE=1SV=4;sp|P58876|H2B1D_HUMANHisto…	6	4	5	13.989	94.301	42.1	28.6	35.7
sp|Q9BUF5|TBB6_HUMANTubulinbeta-6chainOS=HomosapiensGN=TUBB6PE=1SV=1;tr|K7ESM5|K7ESM5_HUMANTubulinbetachain(Fragment)OS=HomosapiensGN=TUBB6PE=1SV=1	6	5	5	49.857	7.3884	14.8	11	10.8
tr|G3V1N2|G3V1N2_HUMANHCG1745306,isoformCRA_aOS=HomosapiensGN=HBA2PE=1SV=1;sp|P69905|HBA_HUMANHemoglobinsubunitalphaOS=HomosapiensGN=HBA1PE=1SV=2	6	7	5	11.948	12.306	41.8	41.8	30.9
sp|O00592|PODXL_HUMANPodocalyxinOS=HomosapiensGN=PODXLPE=1SV=2	6	8	6	58.635	136.46	10.2	11.8	10.2
sp|P23526|SAHH_HUMANAdenosylhomocysteinaseOS=HomosapiensGN=AHCYPE=1SV=4	6	9	6	47.716	119.28	14.6	20.1	14.1
sp|Q3ZCM7|TBB8_HUMANTubulinbeta-8chainOS=HomosapiensGN=TUBB8PE=1SV=2;tr|A0A075B736|A0A075B736_HUMANTubulinbetachainOS=HomosapiensGN=TUBB8PE=1SV=1;tr|Q5SQY0|Q5SQY0_HUMANTubulinbetachainOS=HomosapiensGN=TUBB8PE=1SV=1	6	8	8	49.775	29.675	18.7	20.7	20.3
tr|A8MUD9|A8MUD9_HUMAN60SribosomalproteinL7OS=HomosapiensGN=RPL7PE=1SV=1;sp|P18124|RL7_HUMAN60SribosomalproteinL7OS=HomosapiensGN=RPL7PE=1SV=1;tr|C9JIJ5|C9JIJ5_HUMAN60SribosomalproteinL7(Fragment)OS=HomosapiensGN=RPL7PE=1SV=1	5	2	2	24.433	33.809	24.5	12	13.9
tr|F8W1R7|F8W1R7_HUMANMyosinlightpolypeptide6OS=HomosapiensGN=MYL6PE=1SV=1;sp|P60660|MYL6_HUMANMyosinlightpolypeptide6OS=HomosapiensGN=MYL6PE=1SV=2;tr|J3KND3|J3KND3_HUMANMyosinlightpolypeptide6OS=HomosapiensGN=MYL6PE=1SV=1;tr|G8JLA2|G8JLA2_HUMANMyosinlightpolypeptide6OS=HomosapiensGN=MYL6PE=1SV=1;tr|G3V1V0|G3V1V0_HUMANMyosinlightpolypeptide6OS=HomosapiensGN=MYL6PE=1SV=1;tr|B7Z6Z4|B7Z6Z4_HUMANMyos…	5	6	3	16.29	59.288	44.1	49.7	25.5
sp|P18206|VINC_HUMANVinculinOS=HomosapiensGN=VCLPE=1SV=4	5	8	3	123.8	78.487	6.4	8.2	3.1
sp|P04114|APOB_HUMANApolipoproteinB-100OS=HomosapiensGN=APOBPE=1SV=2	5	5	4	515.6	12.875	1.2	1.2	1.1
tr|F5GZS6|F5GZS6_HUMAN4F2cell-surfaceantigenheavychainOS=HomosapiensGN=SLC3A2PE=1SV=1;sp|P08195|4F2_HUMAN4F2cell-surfaceantigenheavychainOS=HomosapiensGN=SLC3A2PE=1SV=3;tr|J3KPF3|J3KPF3_HUMAN4F2cell-surfaceantigenheavychainOS=HomosapiensGN=SLC3A2PE=1SV=1;tr|F5GZI0|F5GZI0_HUMAN4F2cell-surfaceantigenheavychainOS=HomosapiensGN=SLC3A2PE=1SV=1;tr|H0YFX4|H0YFX4_HUMAN4F2cell-surfaceantigenheavychain(Fra…	5	5	4	64.872	41.167	11.5	11.5	9.8
sp|P62937|PPIA_HUMANPeptidyl-prolylcis-transisomeraseAOS=HomosapiensGN=PPIAPE=1SV=2;tr|F8WE65|F8WE65_HUMANPeptidyl-prolylcis-transisomeraseOS=HomosapiensGN=PPIAPE=1SV=1;tr|C9J5S7|C9J5S7_HUMANPeptidyl-prolylcis-transisomeraseOS=HomosapiensGN=PPIAPE=1SV=1	5	5	4	18.012	51.639	37	37	31.5
tr|H0YEN5|H0YEN5_HUMAN40SribosomalproteinS2(Fragment)OS=HomosapiensGN=RPS2PE=1SV=1;sp|P15880|RS2_HUMAN40SribosomalproteinS2OS=HomosapiensGN=RPS2PE=1SV=2;tr|E9PMM9|E9PMM9_HUMAN40SribosomalproteinS2(Fragment)OS=HomosapiensGN=RPS2PE=1SV=1;tr|E9PQD7|E9PQD7_HUMAN40SribosomalproteinS2OS=HomosapiensGN=RPS2PE=1SV=1;tr|I3L404|I3L404_HUMAN40SribosomalproteinS2(Fragment)OS=HomosapiensGN=RPS2PE=1SV=1;tr|E9PM…	5	6	4	21.154	51.731	27.2	29.7	20
sp|Q5VTE0|EF1A3_HUMANPutativeelongationfactor1-alpha-like3OS=HomosapiensGN=EEF1A1P5PE=5SV=1;sp|P68104|EF1A1_HUMANElongationfactor1-alpha1OS=HomosapiensGN=EEF1A1PE=1SV=1;tr|A0A087WVQ9|A0A087WVQ9_HUMANElongationfactor1-alpha1OS=HomosapiensGN=EEF1A1PE=1SV=1;tr|A0A087WV01|A0A087WV01_HUMANElongationfactor1-alphaOS=HomosapiensGN=EEF1A1PE=1SV=1;tr|A6PW80|A6PW80_HUMANElongationfactor1-alpha1(Fragment)OS=…	5	6	6	50.184	89.647	17.5	20.8	20.6
sp|P78371|TCPB_HUMANT-complexprotein1subunitbetaOS=HomosapiensGN=CCT2PE=1SV=4;tr|F8VQ14|F8VQ14_HUMANT-complexprotein1subunitbetaOS=HomosapiensGN=CCT2PE=1SV=1;tr|F5GWF6|F5GWF6_HUMANT-complexprotein1subunitbetaOS=HomosapiensGN=CCT2PE=1SV=2	5	9	11	57.488	100.44	10.7	20.9	24.3
sp|Q9NZM1|MYOF_HUMANMyoferlinOS=HomosapiensGN=MYOFPE=1SV=1;tr|H0YD14|H0YD14_HUMANMyoferlin(Fragment)OS=HomosapiensGN=MYOFPE=1SV=1	4	3	0	234.71	31.934	2.5	1.8	0
sp|P02787|TRFE_HUMANSerotransferrinOS=HomosapiensGN=TFPE=1SV=3;tr|H7C5E8|H7C5E8_HUMANSerotransferrin(Fragment)OS=HomosapiensGN=TFPE=1SV=1	4	1	1	77.063	6.5558	3.3	1.7	1.7
tr|M0R3D6|M0R3D6_HUMAN60SribosomalproteinL18a(Fragment)OS=HomosapiensGN=RPL18APE=1SV=1;tr|M0R1A7|M0R1A7_HUMAN60SribosomalproteinL18aOS=HomosapiensGN=RPL18APE=1SV=1;tr|M0R117|M0R117_HUMAN60SribosomalproteinL18aOS=HomosapiensGN=RPL18APE=1SV=1;sp|Q02543|RL18A_HUMAN60SribosomalproteinL18aOS=HomosapiensGN=RPL18APE=1SV=2;tr|M0R0P7|M0R0P7_HUMAN60SribosomalproteinL18aOS=HomosapiensGN=RPL18APE=1SV=1	4	5	1	16.714	33.633	22.7	32.6	5
sp|P06748|NPM_HUMANNucleophosminOS=HomosapiensGN=NPM1PE=1SV=2;tr|E5RGW4|E5RGW4_HUMANNucleophosmin(Fragment)OS=HomosapiensGN=NPM1PE=1SV=1;tr|E5RI98|E5RI98_HUMANNucleophosmin(Fragment)OS=HomosapiensGN=NPM1PE=1SV=1	4	1	2	32.575	45.865	24.1	3.1	12.2
tr|Q5TEC6|Q5TEC6_HUMANHistoneH3OS=HomosapiensGN=HIST2H3PS2PE=1SV=1	4	1	2	15.43	6.3107	25	6.6	11.8
tr|A6NNI4|A6NNI4_HUMANTetraspaninOS=HomosapiensGN=CD9PE=1SV=1;tr|G8JLH6|G8JLH6_HUMANTetraspanin(Fragment)OS=HomosapiensGN=CD9PE=1SV=1;sp|P21926|CD9_HUMANCD9antigenOS=HomosapiensGN=CD9PE=1SV=4;tr|A0A087WU13|A0A087WU13_HUMANTetraspaninOS=HomosapiensGN=CD9PE=1SV=1	4	3	2	17.764	80.414	28.9	28.9	22
tr|K7EK07|K7EK07_HUMANHistoneH3(Fragment)OS=HomosapiensGN=H3F3BPE=1SV=1;sp|Q71DI3|H32_HUMANHistoneH3.2OS=HomosapiensGN=HIST2H3APE=1SV=3;sp|Q16695|H31T_HUMANHistoneH3.1tOS=HomosapiensGN=HIST3H3PE=1SV=3;sp|P84243|H33_HUMANHistoneH3.3OS=HomosapiensGN=H3F3APE=1SV=2;sp|P68431|H31_HUMANHistoneH3.1OS=HomosapiensGN=HIST1H3APE=1SV=2;sp|Q6NXT2|H3C_HUMANHistoneH3.3COS=HomosapiensGN=H3F3CPE=1SV=3;tr|K7EMV3|K…	4	2	3	14.914	33.623	25.8	15.2	17.4
tr|E7EQB2|E7EQB2_HUMANLactotransferrin(Fragment)OS=HomosapiensGN=LTFPE=1SV=1;tr|E7ER44|E7ER44_HUMANLactotransferrinOS=HomosapiensGN=LTFPE=1SV=1;sp|P02788|TRFL_HUMANLactotransferrinOS=HomosapiensGN=LTFPE=1SV=6	4	3	3	76.625	6.6743	5.5	4.3	4.3
sp|P43121|MUC18_HUMANCellsurfaceglycoproteinMUC18OS=HomosapiensGN=MCAMPE=1SV=2	4	3	3	71.607	37.049	7.7	5.9	6.3
sp|P62333|PRS10_HUMAN26Sproteasomeregulatorysubunit10BOS=HomosapiensGN=PSMC6PE=1SV=1;tr|A0A087X2I1|A0A087X2I1_HUMAN26Sproteasomeregulatorysubunit10BOS=HomosapiensGN=PSMC6PE=1SV=1;tr|H0YJC0|H0YJC0_HUMAN26Sproteasomeregulatorysubunit10B(Fragment)OS=HomosapiensGN=PSMC6PE=1SV=1;tr|H0YJS8|H0YJS8_HUMAN26Sproteasomeregulatorysubunit10B(Fragment)OS=HomosapiensGN=PSMC6PE=1SV=2;tr|H0YJE9|H0YJE9_HUMAN26Spro…	4	4	3	44.172	46.529	14.1	12.6	10.5
sp|Q15365|PCBP1_HUMANPoly(rC)-bindingprotein1OS=HomosapiensGN=PCBP1PE=1SV=2;tr|F8VTZ0|F8VTZ0_HUMANPoly(rC)-bindingprotein2(Fragment)OS=HomosapiensGN=PCBP2PE=1SV=1	4	4	3	37.497	36.354	15.2	15.2	10.1
sp|P02786|TFR1_HUMANTransferrinreceptorprotein1OS=HomosapiensGN=TFRCPE=1SV=2;tr|G3V0E5|G3V0E5_HUMANTransferrinreceptor(P90,CD71),isoformCRA_cOS=HomosapiensGN=TFRCPE=1SV=1;tr|F8WBE5|F8WBE5_HUMANTransferrinreceptorprotein1OS=HomosapiensGN=TFRCPE=1SV=1	4	5	3	84.87	39.202	5.8	7	4.6
sp|P00966|ASSY_HUMANArgininosuccinatesynthaseOS=HomosapiensGN=ASS1PE=1SV=2;tr|Q5T6L5|Q5T6L5_HUMANArgininosuccinatesynthase(Fragment)OS=HomosapiensGN=ASS1PE=1SV=1;tr|Q5T6L6|Q5T6L6_HUMANArgininosuccinatesynthase(Fragment)OS=HomosapiensGN=ASS1PE=1SV=1	4	6	3	46.53	50.8	10.9	17	7
tr|A0A1W2PP35|A0A1W2PP35_HUMANHeterogeneousnuclearribonucleoproteinU(Fragment)OS=HomosapiensGN=HNRNPUPE=1SV=1;tr|A0A1X7SBS1|A0A1X7SBS1_HUMANHeterogeneousnuclearribonucleoproteinUOS=HomosapiensGN=HNRNPUPE=1SV=1;tr|A0A1W2PPS1|A0A1W2PPS1_HUMANHeterogeneousnuclearribonucleoproteinUOS=HomosapiensGN=HNRNPUPE=1SV=1;sp|Q00839|HNRPU_HUMANHeterogeneousnuclearribonucleoproteinUOS=HomosapiensGN=HNRNPUPE=1SV=…	4	6	3	80.648	59.711	6.2	12.6	6.7
tr|E7ERF2|E7ERF2_HUMANT-complexprotein1subunitalphaOS=HomosapiensGN=TCP1PE=1SV=1;sp|P17987|TCPA_HUMANT-complexprotein1subunitalphaOS=HomosapiensGN=TCP1PE=1SV=1;tr|F5GZI8|F5GZI8_HUMANT-complexprotein1subunitalphaOS=HomosapiensGN=TCP1PE=1SV=1;tr|F5GYL4|F5GYL4_HUMANT-complexprotein1subunitalphaOS=HomosapiensGN=TCP1PE=1SV=1;tr|F5GZ03|F5GZ03_HUMANT-complexprotein1subunitalpha(Fragment)OS=HomosapiensGN…	4	3	4	46.91	24.179	10.6	8.1	10.6
sp|P50990|TCPQ_HUMANT-complexprotein1subunitthetaOS=HomosapiensGN=CCT8PE=1SV=4;tr|H7C4C8|H7C4C8_HUMANT-complexprotein1subunittheta(Fragment)OS=HomosapiensGN=CCT8PE=1SV=1;tr|H7C2U0|H7C2U0_HUMANT-complexprotein1subunittheta(Fragment)OS=HomosapiensGN=CCT8PE=1SV=1	4	3	4	59.62	48.712	8.4	6.6	9.5
sp|P02765|FETUA_HUMANAlpha-2-HS-glycoproteinOS=HomosapiensGN=AHSGPE=1SV=1;tr|C9JV77|C9JV77_HUMANAlpha-2-HS-glycoproteinOS=HomosapiensGN=AHSGPE=1SV=1	4	4	4	39.324	6.9484	7.1	7.1	7.1
tr|G3V576|G3V576_HUMANHeterogeneousnuclearribonucleoproteinsC1/C2OS=HomosapiensGN=HNRNPCPE=1SV=1;tr|G3V4W0|G3V4W0_HUMANHeterogeneousnuclearribonucleoproteinsC1/C2(Fragment)OS=HomosapiensGN=HNRNPCPE=1SV=1;tr|B4DY08|B4DY08_HUMANHeterogeneousnuclearribonucleoproteinsC1/C2OS=HomosapiensGN=HNRNPCPE=1SV=1;tr|B2R5W2|B2R5W2_HUMANHeterogeneousnuclearribonucleoproteinsC1/C2OS=HomosapiensGN=HNRNPCPE=1SV=1;t…	4	4	4	25.256	39.512	21.2	21.2	21.6
tr|E9PCY7|E9PCY7_HUMANHeterogeneousnuclearribonucleoproteinHOS=HomosapiensGN=HNRNPH1PE=1SV=1;sp|P31943|HNRH1_HUMANHeterogeneousnuclearribonucleoproteinHOS=HomosapiensGN=HNRNPH1PE=1SV=4;tr|G8JLB6|G8JLB6_HUMANHeterogeneousnuclearribonucleoproteinHOS=HomosapiensGN=HNRNPH1PE=1SV=1;tr|E7EN40|E7EN40_HUMANHeterogeneousnuclearribonucleoproteinH(Fragment)OS=HomosapiensGN=HNRNPH1PE=1SV=1;tr|D6RIU0|D6RIU0_H…	4	4	4	47.087	39.809	13.3	11.4	13.3
sp|P61769|B2MG_HUMANBeta-2-microglobulinOS=HomosapiensGN=B2MPE=1SV=1;tr|H0YLF3|H0YLF3_HUMANBeta-2-microglobulin(Fragment)OS=HomosapiensGN=B2MPE=1SV=1;tr|F5H6I0|F5H6I0_HUMANBeta-2-microglobulinOS=HomosapiensGN=B2MPE=1SV=2	4	4	4	13.714	66.736	46.2	42	44.5
sp|P04004|VTNC_HUMANVitronectinOS=HomosapiensGN=VTNPE=1SV=1	4	5	4	54.305	8.5947	6.9	9.2	7.5
tr|H0YD13|H0YD13_HUMANCD44antigenOS=HomosapiensGN=CD44PE=1SV=2;sp|P16070|CD44_HUMANCD44antigenOS=HomosapiensGN=CD44PE=1SV=3;tr|H0YDW7|H0YDW7_HUMANCD44antigen(Fragment)OS=HomosapiensGN=CD44PE=1SV=1;tr|H0YCV9|H0YCV9_HUMANCD44antigen(Fragment)OS=HomosapiensGN=CD44PE=1SV=1;tr|H0Y2P0|H0Y2P0_HUMANCD44antigen(Fragment)OS=HomosapiensGN=CD44PE=1SV=1;tr|H0Y5E4|H0Y5E4_HUMANCD44antigen(Fragment)OS=Homosapien…	4	5	4	22.683	36.959	19.9	23.8	18.9
sp|P23229|ITA6_HUMANIntegrinalpha-6OS=HomosapiensGN=ITGA6PE=1SV=5;tr|C9JXX7|C9JXX7_HUMANIntegrinalpha-6(Fragment)OS=HomosapiensGN=ITGA6PE=1SV=1;tr|H7BZ97|H7BZ97_HUMANIntegrinalpha-6(Fragment)OS=HomosapiensGN=ITGA6PE=1SV=1	4	5	4	126.6	86.298	4.1	5.5	4.2
sp|Q05639|EF1A2_HUMANElongationfactor1-alpha2OS=HomosapiensGN=EEF1A2PE=1SV=1	4	4	5	50.47	13.181	11.4	9.5	14.5
sp|O75369|FLNB_HUMANFilamin-BOS=HomosapiensGN=FLNBPE=1SV=2;tr|E7EN95|E7EN95_HUMANFilamin-BOS=HomosapiensGN=FLNBPE=1SV=1	4	5	5	278.16	6.4348	1.6	2	1.6
tr|Q5VY30|Q5VY30_HUMANRetinolbindingprotein4,plasma,isoformCRA_bOS=HomosapiensGN=RBP4PE=1SV=2;sp|P02753|RET4_HUMANRetinol-bindingprotein4OS=HomosapiensGN=RBP4PE=1SV=3	4	5	5	22.974	100	11.1	23.6	23.6
tr|A0A0A0MSI0|A0A0A0MSI0_HUMANPeroxiredoxin-1(Fragment)OS=HomosapiensGN=PRDX1PE=1SV=1;sp|Q06830|PRDX1_HUMANPeroxiredoxin-1OS=HomosapiensGN=PRDX1PE=1SV=1;tr|A0A0A0MRQ5|A0A0A0MRQ5_HUMANPeroxiredoxin-1OS=HomosapiensGN=PRDX1PE=1SV=1;tr|H7C3T4|H7C3T4_HUMANPeroxiredoxin-4(Fragment)OS=HomosapiensGN=PRDX4PE=1SV=1;sp|Q13162|PRDX4_HUMANPeroxiredoxin-4OS=HomosapiensGN=PRDX4PE=1SV=1	4	5	5	18.976	43.361	18.7	28.1	24.6
sp|P35580|MYH10_HUMANMyosin-10OS=HomosapiensGN=MYH10PE=1SV=3	4	6	5	229	6.8718	1.9	3.1	2.7
tr|X1WI28|X1WI28_HUMAN60SribosomalproteinL10(Fragment)OS=HomosapiensGN=RPL10PE=1SV=7;sp|P27635|RL10_HUMAN60SribosomalproteinL10OS=HomosapiensGN=RPL10PE=1SV=4;tr|F8W7C6|F8W7C6_HUMAN60SribosomalproteinL10OS=HomosapiensGN=RPL10PE=1SV=2;tr|A0A087WV22|A0A087WV22_HUMAN60SribosomalproteinL10OS=HomosapiensGN=RPL10PE=1SV=1;tr|B8A6G2|B8A6G2_HUMAN60SribosomalproteinL10(Fragment)OS=HomosapiensGN=RPL10PE=1SV=…	4	8	5	22.975	91.92	21	41.5	31
tr|A0A087X208|A0A087X208_HUMANAgrinOS=HomosapiensGN=AGRNPE=1SV=1;sp|O00468|AGRIN_HUMANAgrinOS=HomosapiensGN=AGRNPE=1SV=5	4	5	6	202.29	66.575	2.8	3.1	3.6
sp|Q15555|MARE2_HUMANMicrotubule-associatedproteinRP/EBfamilymember2OS=HomosapiensGN=MAPRE2PE=1SV=1;tr|M0QX52|M0QX52_HUMANMicrotubule-associatedproteinRP/EBfamilymember2(Fragment)OS=HomosapiensGN=MAPRE2PE=1SV=1;tr|K7EL66|K7EL66_HUMANMicrotubule-associatedproteinRP/EBfamilymember2(Fragment)OS=HomosapiensGN=MAPRE2PE=1SV=1;tr|K7ERD8|K7ERD8_HUMANMicrotubule-associatedproteinRP/EBfamilymember2(Fragmen…	4	7	6	37.031	85.99	10.7	12.2	14.1
tr|Q5T6W2|Q5T6W2_HUMANHeterogeneousnuclearribonucleoproteinK(Fragment)OS=HomosapiensGN=HNRNPKPE=1SV=1;sp|P61978|HNRPK_HUMANHeterogeneousnuclearribonucleoproteinKOS=HomosapiensGN=HNRNPKPE=1SV=1;tr|S4R359|S4R359_HUMANHeterogeneousnuclearribonucleoproteinK(Fragment)OS=HomosapiensGN=HNRNPKPE=1SV=1	4	6	7	41.807	71.4	15.8	22.2	26.4
sp|P50991|TCPD_HUMANT-complexprotein1subunitdeltaOS=HomosapiensGN=CCT4PE=1SV=4	4	7	7	57.924	70.264	11.3	18.2	18.7
sp|P13639|EF2_HUMANElongationfactor2OS=HomosapiensGN=EEF2PE=1SV=4	4	4	8	95.337	59.186	5.4	4.7	9.6
sp|P21980|TGM2_HUMANProtein-glutaminegamma-glutamyltransferase2OS=HomosapiensGN=TGM2PE=1SV=2;tr|A2A299|A2A299_HUMANProtein-glutaminegamma-glutamyltransferase2(Fragment)OS=HomosapiensGN=TGM2PE=1SV=8;tr|A2A2A0|A2A2A0_HUMANProtein-glutaminegamma-glutamyltransferase2(Fragment)OS=HomosapiensGN=TGM2PE=1SV=8	4	11	8	77.328	111.55	7.6	21.1	15.1
tr|B4DUR8|B4DUR8_HUMANT-complexprotein1subunitgammaOS=HomosapiensGN=CCT3PE=1SV=1;sp|P49368|TCPG_HUMANT-complexprotein1subunitgammaOS=HomosapiensGN=CCT3PE=1SV=4;tr|Q5SZX9|Q5SZX9_HUMANT-complexprotein1subunitgamma(Fragment)OS=HomosapiensGN=CCT3PE=1SV=1;tr|E9PRC8|E9PRC8_HUMANT-complexprotein1subunitgamma(Fragment)OS=HomosapiensGN=CCT3PE=1SV=1;tr|Q5SZX6|Q5SZX6_HUMANT-complexprotein1subunitgamma(Fragm…	4	5	9	55.674	73.406	11.2	15.2	20.6
sp|P13671|CO6_HUMANComplementcomponentC6OS=HomosapiensGN=C6PE=1SV=3	3	1	0	104.79	25.41	4.3	1.7	0
sp|P11279|LAMP1_HUMANLysosome-associatedmembraneglycoprotein1OS=HomosapiensGN=LAMP1PE=1SV=3	3	3	1	44.882	29.26	7.2	7.2	5
tr|B4DKB2|B4DKB2_HUMANEndothelin-convertingenzyme1OS=HomosapiensGN=ECE1PE=1SV=1;sp|P42892|ECE1_HUMANEndothelin-convertingenzyme1OS=HomosapiensGN=ECE1PE=1SV=2	3	3	1	83.573	24.413	6.5	6.5	2
sp|P23396|RS3_HUMAN40SribosomalproteinS3OS=HomosapiensGN=RPS3PE=1SV=2;tr|F2Z2S8|F2Z2S8_HUMAN40SribosomalproteinS3OS=HomosapiensGN=RPS3PE=1SV=1;tr|H0YF32|H0YF32_HUMAN40SribosomalproteinS3(Fragment)OS=HomosapiensGN=RPS3PE=1SV=1;tr|H0YCJ7|H0YCJ7_HUMAN40SribosomalproteinS3(Fragment)OS=HomosapiensGN=RPS3PE=1SV=1;tr|E9PPU1|E9PPU1_HUMAN40SribosomalproteinS3OS=HomosapiensGN=RPS3PE=1SV=1;tr|E9PL09|E9PL09_…	3	4	1	26.688	29.618	11.5	17.3	4.1
sp|P60953|CDC42_HUMANCelldivisioncontrolprotein42homologOS=HomosapiensGN=CDC42PE=1SV=2;tr|Q5JYX0|Q5JYX0_HUMANCelldivisioncontrolprotein42homolog(Fragment)OS=HomosapiensGN=CDC42PE=1SV=1	3	4	1	21.258	30.978	21.5	26.7	5.2
tr|H3BRY3|H3BRY3_HUMANCoroninOS=HomosapiensGN=CORO1APE=1SV=1;sp|P31146|COR1A_HUMANCoronin-1AOS=HomosapiensGN=CORO1APE=1SV=4;tr|H3BTU6|H3BTU6_HUMANCoronin(Fragment)OS=HomosapiensGN=CORO1APE=1SV=1;tr|H3BRJ0|H3BRJ0_HUMANCoronin(Fragment)OS=HomosapiensGN=CORO1APE=1SV=1	3	2	2	43.353	24.545	10	4.9	7.2
tr|Q5JR95|Q5JR95_HUMAN40SribosomalproteinS8OS=HomosapiensGN=RPS8PE=1SV=1;sp|P62241|RS8_HUMAN40SribosomalproteinS8OS=HomosapiensGN=RPS8PE=1SV=2	3	2	2	21.879	19.555	19.1	14.4	14.4
sp|O00299|CLIC1_HUMANChlorideintracellularchannelprotein1OS=HomosapiensGN=CLIC1PE=1SV=4	3	3	2	26.922	30.548	16.6	16.6	11.2
sp|P60842|IF4A1_HUMANEukaryoticinitiationfactor4A-IOS=HomosapiensGN=EIF4A1PE=1SV=1;tr|E7EQG2|E7EQG2_HUMANEukaryoticinitiationfactor4A-IIOS=HomosapiensGN=EIF4A2PE=1SV=1;sp|Q14240|IF4A2_HUMANEukaryoticinitiationfactor4A-IIOS=HomosapiensGN=EIF4A2PE=1SV=2;tr|J3QLN6|J3QLN6_HUMANEukaryoticinitiationfactor4A-I(Fragment)OS=HomosapiensGN=EIF4A1PE=1SV=1;tr|J3QR64|J3QR64_HUMANEukaryoticinitiationfactor4A-I(…	3	3	2	46.153	30.935	9.6	9.6	7.4
sp|P67936|TPM4_HUMANTropomyosinalpha-4chainOS=HomosapiensGN=TPM4PE=1SV=3;tr|K7ERG3|K7ERG3_HUMANTropomyosinalpha-4chain(Fragment)OS=HomosapiensGN=TPM4PE=1SV=1;tr|K7ENT6|K7ENT6_HUMANTropomyosinalpha-4chain(Fragment)OS=HomosapiensGN=TPM4PE=1SV=1;tr|Q5TCU3|Q5TCU3_HUMANTropomyosinbetachainOS=HomosapiensGN=TPM2PE=1SV=1;sp|P07951|TPM2_HUMANTropomyosinbetachainOS=HomosapiensGN=TPM2PE=1SV=1;CON__Q3SX28;sp…	3	1	3	28.521	56.161	8.9	2.8	19.8
sp|P13224|GP1BB_HUMANPlateletglycoproteinIbbetachainOS=HomosapiensGN=GP1BBPE=1SV=1	3	2	3	21.717	22.631	10.7	10.7	10.7
sp|P13726|TF_HUMANTissuefactorOS=HomosapiensGN=F3PE=1SV=1	3	2	3	33.067	38.726	12.2	11.2	12.2
tr|F8VPD4|F8VPD4_HUMANCADproteinOS=HomosapiensGN=CADPE=1SV=1;sp|P27708|PYR1_HUMANCADproteinOS=HomosapiensGN=CADPE=1SV=3;tr|H7BZB3|H7BZB3_HUMANCADprotein(Fragment)OS=HomosapiensGN=CADPE=1SV=8	3	2	3	236.02	19.356	1.5	0.9	1.5
sp|P31949|S10AB_HUMANProteinS100-A11OS=HomosapiensGN=S100A11PE=1SV=2	3	2	3	11.74	31.565	35.2	19	35.2
tr|M0QZC5|M0QZC5_HUMAN40SribosomalproteinS11OS=HomosapiensGN=RPS11PE=1SV=1;sp|P62280|RS11_HUMAN40SribosomalproteinS11OS=HomosapiensGN=RPS11PE=1SV=3;tr|M0R1H6|M0R1H6_HUMAN40SribosomalproteinS11OS=HomosapiensGN=RPS11PE=1SV=1	3	2	3	13.997	17.483	27.1	16.1	27.1
tr|H0YHC3|H0YHC3_HUMANNucleosomeassemblyprotein1-like1(Fragment)OS=HomosapiensGN=NAP1L1PE=1SV=1;tr|F8W020|F8W020_HUMANNucleosomeassemblyprotein1-like1(Fragment)OS=HomosapiensGN=NAP1L1PE=1SV=1;tr|F8W118|F8W118_HUMANNucleosomeassemblyprotein1-like1(Fragment)OS=HomosapiensGN=NAP1L1PE=1SV=1;tr|F8VXI6|F8VXI6_HUMANNucleosomeassemblyprotein1-like1(Fragment)OS=HomosapiensGN=NAP1L1PE=1SV=1;tr|F8VUX1|F8VUX…	3	3	3	23.417	38.034	23.2	23.2	22.7
sp|P07195|LDHB_HUMANL-lactatedehydrogenaseBchainOS=HomosapiensGN=LDHBPE=1SV=2;tr|A8MW50|A8MW50_HUMANL-lactatedehydrogenase(Fragment)OS=HomosapiensGN=LDHBPE=1SV=1;tr|F5H793|F5H793_HUMANL-lactatedehydrogenaseBchain(Fragment)OS=HomosapiensGN=LDHBPE=1SV=1;tr|C9J7H8|C9J7H8_HUMANL-lactatedehydrogenaseBchain(Fragment)OS=HomosapiensGN=LDHBPE=1SV=8	3	4	3	36.638	41.483	9	13.2	9
tr|Q8MH48|Q8MH48_HUMANHLAclassIhistocompatibilityantigen,alphachainGOS=HomosapiensGN=HLA-GPE=1SV=1;sp|P17693|HLAG_HUMANHLAclassIhistocompatibilityantigen,alphachainGOS=HomosapiensGN=HLA-GPE=1SV=1;tr|Q5RJ85|Q5RJ85_HUMANHLAclassIhistocompatibilityantigen,alphachainGOS=HomosapiensGN=HLA-GPE=1SV=1;tr|A0A0G2JPQ3|A0A0G2JPQ3_HUMANHLAclassIhistocompatibilityantigen,alphachainGOS=HomosapiensGN=HLA-GPE=1SV…	3	4	3	38.254	23.037	10.9	10.9	10.7
sp|P23528|COF1_HUMANCofilin-1OS=HomosapiensGN=CFL1PE=1SV=3;tr|G3V1A4|G3V1A4_HUMANCofilin1(Non-muscle),isoformCRA_aOS=HomosapiensGN=CFL1PE=1SV=1;tr|E9PP50|E9PP50_HUMANCofilin-1(Fragment)OS=HomosapiensGN=CFL1PE=1SV=8;tr|E9PK25|E9PK25_HUMANCofilin-1OS=HomosapiensGN=CFL1PE=1SV=1;tr|E9PQB7|E9PQB7_HUMANCofilin-1(Fragment)OS=HomosapiensGN=CFL1PE=1SV=1;tr|E9PLJ3|E9PLJ3_HUMANCofilin-1(Fragment)OS=Homosapi…	3	5	3	18.502	72.411	27.1	39.2	31.9
sp|P48059|LIMS1_HUMANLIMandsenescentcellantigen-like-containingdomainprotein1OS=HomosapiensGN=LIMS1PE=1SV=4;tr|A0A0J9YXC7|A0A0J9YXC7_HUMANLIMandsenescentcellantigen-like-containingdomainproteinOS=HomosapiensGN=LIMS4PE=1SV=1;tr|A0A0M3HER1|A0A0M3HER1_HUMANLIMandsenescentcellantigen-like-containingdomainprotein1(Fragment)OS=HomosapiensGN=LIMS1PE=1SV=1;sp|Q7Z4I7|LIMS2_HUMANLIMandsenescentcellantigen-…	3	6	3	37.251	50.912	11.4	19.7	11.4
sp|P16422|EPCAM_HUMANEpithelialcelladhesionmoleculeOS=HomosapiensGN=EPCAMPE=1SV=2;tr|B5MCA4|B5MCA4_HUMANEpithelialcelladhesionmoleculeOS=HomosapiensGN=EPCAMPE=1SV=1;tr|C9JKY3|C9JKY3_HUMANEpithelialcelladhesionmolecule(Fragment)OS=HomosapiensGN=EPCAMPE=1SV=1	3	4	4	34.932	62.064	14	19.1	17.2
sp|Q13200|PSMD2_HUMAN26Sproteasomenon-ATPaseregulatorysubunit2OS=HomosapiensGN=PSMD2PE=1SV=3;tr|H7C2Q3|H7C2Q3_HUMAN26Sproteasomenon-ATPaseregulatorysubunit2(Fragment)OS=HomosapiensGN=PSMD2PE=1SV=1;tr|C9JPC0|C9JPC0_HUMAN26Sproteasomenon-ATPaseregulatorysubunit2(Fragment)OS=HomosapiensGN=PSMD2PE=1SV=1	3	7	4	100.2	49.859	5.4	10.6	6.7
tr|A0A087WTA8|A0A087WTA8_HUMANCollagenalpha-2(I)chainOS=HomosapiensGN=COL1A2PE=1SV=1;sp|P08123|CO1A2_HUMANCollagenalpha-2(I)chainOS=HomosapiensGN=COL1A2PE=1SV=7	3	2	5	129.15	72.459	3.7	3	5.5
sp|Q9NZN3|EHD3_HUMANEHdomain-containingprotein3OS=HomosapiensGN=EHD3PE=1SV=2	3	6	5	60.886	79.788	7.3	13.1	11.2
sp|O75083|WDR1_HUMANWDrepeat-containingprotein1OS=HomosapiensGN=WDR1PE=1SV=4;tr|D6RD66|D6RD66_HUMANWDrepeat-containingprotein1(Fragment)OS=HomosapiensGN=WDR1PE=1SV=1	3	4	6	66.193	45.49	4.6	6.1	10.2
tr|B1AHL2|B1AHL2_HUMANFibulin-1OS=HomosapiensGN=FBLN1PE=1SV=1	3	6	6	78.329	9.3993	4.3	8.6	10
sp|P62826|RAN_HUMANGTP-bindingnuclearproteinRanOS=HomosapiensGN=RANPE=1SV=3;tr|B5MDF5|B5MDF5_HUMANGTP-bindingnuclearproteinRanOS=HomosapiensGN=RANPE=1SV=1;tr|J3KQE5|J3KQE5_HUMANGTP-bindingnuclearproteinRan(Fragment)OS=HomosapiensGN=RANPE=1SV=1;tr|F5H018|F5H018_HUMANGTP-bindingnuclearproteinRan(Fragment)OS=HomosapiensGN=RANPE=1SV=8;tr|H0YFC6|H0YFC6_HUMANGTP-bindingnuclearproteinRan(Fragment)OS=Hom…	3	10	7	24.423	85.05	19.4	44	32.4
sp|P00558|PGK1_HUMANPhosphoglyceratekinase1OS=HomosapiensGN=PGK1PE=1SV=3;sp|P07205|PGK2_HUMANPhosphoglyceratekinase2OS=HomosapiensGN=PGK2PE=1SV=3	3	6	8	44.614	93.605	12.5	21.1	24.5
tr|G3V3U4|G3V3U4_HUMANProteasomesubunitalphatypeOS=HomosapiensGN=PSMA6PE=1SV=1;tr|G3V3I1|G3V3I1_HUMANProteasomesubunitalphatypeOS=HomosapiensGN=PSMA6PE=1SV=1;tr|G3V295|G3V295_HUMANProteasomesubunitalphatypeOS=HomosapiensGN=PSMA6PE=1SV=1;sp|P60900|PSA6_HUMANProteasomesubunitalphatype-6OS=HomosapiensGN=PSMA6PE=1SV=1;tr|G3V5Z7|G3V5Z7_HUMANProteasomesubunitalphatypeOS=HomosapiensGN=PSMA6PE=1SV=1	2	1	0	11.57	11.431	19.6	11.2	0
sp|P62753|RS6_HUMAN40SribosomalproteinS6OS=HomosapiensGN=RPS6PE=1SV=1;tr|A2A3R7|A2A3R7_HUMAN40SribosomalproteinS6OS=HomosapiensGN=RPS6PE=1SV=1;tr|A2A3R5|A2A3R5_HUMAN40SribosomalproteinS6OS=HomosapiensGN=RPS6PE=1SV=1	2	1	0	28.68	11.829	8	3.2	0
sp|P0DP25|CALM3_HUMANCalmodulin-3OS=HomosapiensGN=CALM3PE=1SV=1;sp|P0DP24|CALM2_HUMANCalmodulin-2OS=HomosapiensGN=CALM2PE=1SV=1;sp|P0DP23|CALM1_HUMANCalmodulin-1OS=HomosapiensGN=CALM1PE=1SV=1;tr|E7ETZ0|E7ETZ0_HUMANCalmodulin-1OS=HomosapiensGN=CALM1PE=1SV=1;tr|H0Y7A7|H0Y7A7_HUMANCalmodulin-2(Fragment)OS=HomosapiensGN=CALM2PE=1SV=1;tr|E7EMB3|E7EMB3_HUMANCalmodulin-2OS=HomosapiensGN=CALM2PE=1SV=1;tr…	2	2	0	16.837	18.774	22.1	22.1	0
tr|M0R2I7|M0R2I7_HUMANHeterogeneousnuclearribonucleoproteinM(Fragment)OS=HomosapiensGN=HNRNPMPE=1SV=1;tr|A0A087X0X3|A0A087X0X3_HUMANHeterogeneousnuclearribonucleoproteinMOS=HomosapiensGN=HNRNPMPE=1SV=1;sp|P52272|HNRPM_HUMANHeterogeneousnuclearribonucleoproteinMOS=HomosapiensGN=HNRNPMPE=1SV=3;tr|M0QY96|M0QY96_HUMANHeterogeneousnuclearribonucleoproteinM(Fragment)OS=HomosapiensGN=HNRNPMPE=1SV=1;tr|M…	2	2	0	22.589	15.389	14	14	0
sp|Q5JNZ5|RS26L_HUMANPutative40SribosomalproteinS26-like1OS=HomosapiensGN=RPS26P11PE=5SV=1;sp|P62854|RS26_HUMAN40SribosomalproteinS26OS=HomosapiensGN=RPS26PE=1SV=3	2	2	0	13.002	11.091	13.9	13.9	0
tr|F8VUA6|F8VUA6_HUMAN60SribosomalproteinL18(Fragment)OS=HomosapiensGN=RPL18PE=1SV=1;tr|G3V203|G3V203_HUMAN60SribosomalproteinL18OS=HomosapiensGN=RPL18PE=1SV=1;tr|H0YHA7|H0YHA7_HUMAN60SribosomalproteinL18(Fragment)OS=HomosapiensGN=RPL18PE=1SV=1;sp|Q07020|RL18_HUMAN60SribosomalproteinL18OS=HomosapiensGN=RPL18PE=1SV=2;tr|J3QQ67|J3QQ67_HUMAN60SribosomalproteinL18(Fragment)OS=HomosapiensGN=RPL18PE=1S…	2	2	0	14.529	18.139	18.5	18.5	0
tr|J3KR24|J3KR24_HUMANIsoleucine--tRNAligase,cytoplasmicOS=HomosapiensGN=IARSPE=1SV=1;tr|A0A0A0MSX9|A0A0A0MSX9_HUMANIsoleucine--tRNAligase,cytoplasmicOS=HomosapiensGN=IARSPE=1SV=1;sp|P41252|SYIC_HUMANIsoleucine--tRNAligase,cytoplasmicOS=HomosapiensGN=IARSPE=1SV=2;tr|Q5TCD1|Q5TCD1_HUMANIsoleucine--tRNAligase,cytoplasmic(Fragment)OS=HomosapiensGN=IARSPE=1SV=1	2	0	1	131.76	13.627	1.7	0	0.9
tr|Q5SRP5|Q5SRP5_HUMANApolipoproteinMOS=HomosapiensGN=APOMPE=1SV=1;sp|O95445|APOM_HUMANApolipoproteinMOS=HomosapiensGN=APOMPE=1SV=2	2	1	1	14.185	11.658	11.6	5.4	5.4
tr|J3QLE5|J3QLE5_HUMANSmallnuclearribonucleoprotein-associatedproteinN(Fragment)OS=HomosapiensGN=SNRPNPE=1SV=1;sp|P63162|RSMN_HUMANSmallnuclearribonucleoprotein-associatedproteinNOS=HomosapiensGN=SNRPNPE=1SV=1;sp|P14678|RSMB_HUMANSmallnuclearribonucleoprotein-associatedproteinsBandB'OS=HomosapiensGN=SNRPBPE=1SV=2;tr|J3KRY3|J3KRY3_HUMANSmallnuclearribonucleoprotein-associatedproteinN(Fragment)OS=H…	2	1	1	17.546	10.994	8.9	4.1	4.1
sp|P26038|MOES_HUMANMoesinOS=HomosapiensGN=MSNPE=1SV=3;sp|P35241|RADI_HUMANRadixinOS=HomosapiensGN=RDXPE=1SV=1;tr|E7EQR4|E7EQR4_HUMANEzrinOS=HomosapiensGN=EZRPE=1SV=3;sp|P15311|EZRI_HUMANEzrinOS=HomosapiensGN=EZRPE=1SV=4;tr|V9GZ54|V9GZ54_HUMANMoesin(Fragment)OS=HomosapiensGN=MSNPE=1SV=1;tr|E9PQ82|E9PQ82_HUMANRadixin(Fragment)OS=HomosapiensGN=RDXPE=1SV=1;tr|E9PNV3|E9PNV3_HUMANRadixin(Fragment)OS=H…	2	1	1	67.819	11.547	2.8	1.6	1.6
sp|P60174|TPIS_HUMANTriosephosphateisomeraseOS=HomosapiensGN=TPI1PE=1SV=3;tr|U3KQF3|U3KQF3_HUMANTriosephosphateisomerase(Fragment)OS=HomosapiensGN=TPI1PE=1SV=1;tr|U3KPZ0|U3KPZ0_HUMANTriosephosphateisomerase(Fragment)OS=HomosapiensGN=TPI1PE=1SV=1	2	1	1	30.791	14.446	8.7	5.2	5.2
tr|H3BRV9|H3BRV9_HUMANNucleartransportfactor2(Fragment)OS=HomosapiensGN=NUTF2PE=1SV=1;sp|P61970|NTF2_HUMANNucleartransportfactor2OS=HomosapiensGN=NUTF2PE=1SV=1	2	1	1	12.159	10.789	22.4	15	7.5
sp|P62195|PRS8_HUMAN26Sproteasomeregulatorysubunit8OS=HomosapiensGN=PSMC5PE=1SV=1;tr|J3QQM1|J3QQM1_HUMAN26Sproteasomeregulatorysubunit8(Fragment)OS=HomosapiensGN=PSMC5PE=1SV=1;tr|J3QRW1|J3QRW1_HUMAN26Sproteasomeregulatorysubunit8(Fragment)OS=HomosapiensGN=PSMC5PE=1SV=1;tr|J3QSE0|J3QSE0_HUMAN26Sproteasomeregulatorysubunit8OS=HomosapiensGN=PSMC5PE=1SV=1;tr|J3QLH6|J3QLH6_HUMAN26Sproteasomeregulatory…	2	1	1	45.626	20.133	8.1	3.2	3.9
sp|Q9UGM3|DMBT1_HUMANDeletedinmalignantbraintumors1proteinOS=HomosapiensGN=DMBT1PE=1SV=2	2	1	1	260.73	29.863	8.4	5.2	5.2
tr|E7ET40|E7ET40_HUMANUrokinase-typeplasminogenactivatorOS=HomosapiensGN=PLAUPE=1SV=1;sp|P00749|UROK_HUMANUrokinase-typeplasminogenactivatorOS=HomosapiensGN=PLAUPE=1SV=2	2	2	1	46.924	17.92	4.8	5.1	2.7
sp|P62304|RUXE_HUMANSmallnuclearribonucleoproteinEOS=HomosapiensGN=SNRPEPE=1SV=1;tr|A6NHK2|A6NHK2_HUMANSmallnuclearribonucleoproteinEOS=HomosapiensGN=SNRPEPE=1SV=1	2	2	1	10.803	16.326	29.3	29.3	12
sp|Q14974|IMB1_HUMANImportinsubunitbeta-1OS=HomosapiensGN=KPNB1PE=1SV=2;tr|J3QR48|J3QR48_HUMANImportinsubunitbeta-1(Fragment)OS=HomosapiensGN=KPNB1PE=1SV=8;tr|J3KTM9|J3KTM9_HUMANImportinsubunitbeta-1(Fragment)OS=HomosapiensGN=KPNB1PE=1SV=1	2	2	1	97.169	24.638	3.4	3.1	1.7
sp|P05026|AT1B1_HUMANSodium/potassium-transportingATPasesubunitbeta-1OS=HomosapiensGN=ATP1B1PE=1SV=1;tr|V9GYR2|V9GYR2_HUMANSodium/potassium-transportingATPasesubunitbeta(Fragment)OS=HomosapiensGN=ATP1B1PE=1SV=1	2	3	1	35.061	20.892	7.3	10.9	3.6
sp|P52907|CAZA1_HUMANF-actin-cappingproteinsubunitalpha-1OS=HomosapiensGN=CAPZA1PE=1SV=3;sp|P47755|CAZA2_HUMANF-actin-cappingproteinsubunitalpha-2OS=HomosapiensGN=CAPZA2PE=1SV=3;tr|C9JUG7|C9JUG7_HUMANF-actin-cappingproteinsubunitalpha-2OS=HomosapiensGN=CAPZA2PE=1SV=1;tr|F8W9N7|F8W9N7_HUMANF-actin-cappingproteinsubunitalpha-2OS=HomosapiensGN=CAPZA2PE=1SV=1;tr|A0A0D9SET8|A0A0D9SET8_HUMANF-actin-cap…	2	3	1	32.922	20.741	9.8	12.2	3.5
sp|P84077|ARF1_HUMANADP-ribosylationfactor1OS=HomosapiensGN=ARF1PE=1SV=2;sp|P61204|ARF3_HUMANADP-ribosylationfactor3OS=HomosapiensGN=ARF3PE=1SV=2;tr|F5H423|F5H423_HUMANUncharacterizedproteinOS=HomosapiensPE=3SV=1;tr|H0YGG7|H0YGG7_HUMANUncharacterizedprotein(Fragment)OS=HomosapiensPE=4SV=1;tr|C9J1Z8|C9J1Z8_HUMANADP-ribosylationfactor5(Fragment)OS=HomosapiensGN=ARF5PE=1SV=1;sp|P84085|ARF5_HUMANADP-…	2	3	1	20.697	47.78	17.7	13.8	5.5
tr|C9JXB8|C9JXB8_HUMAN60SribosomalproteinL24OS=HomosapiensGN=RPL24PE=1SV=1;tr|C9JNW5|C9JNW5_HUMAN60SribosomalproteinL24OS=HomosapiensGN=RPL24PE=1SV=1;sp|P83731|RL24_HUMAN60SribosomalproteinL24OS=HomosapiensGN=RPL24PE=1SV=1	2	3	1	14.369	17.724	14	20.7	6.6
tr|M0QZH0|M0QZH0_HUMANReticulocalbin-3(Fragment)OS=HomosapiensGN=RCN3PE=1SV=1;sp|Q96D15|RCN3_HUMANReticulocalbin-3OS=HomosapiensGN=RCN3PE=1SV=1;tr|M0QYB8|M0QYB8_HUMANReticulocalbin-3(Fragment)OS=HomosapiensGN=RCN3PE=1SV=1	2	3	1	19.813	21.021	17.8	24.9	8.3
tr|E9PNW4|E9PNW4_HUMANCD59glycoproteinOS=HomosapiensGN=CD59PE=1SV=1;sp|P13987|CD59_HUMANCD59glycoproteinOS=HomosapiensGN=CD59PE=1SV=1;tr|E9PR17|E9PR17_HUMANCD59glycoproteinOS=HomosapiensGN=CD59PE=1SV=1;tr|H0YET2|H0YET2_HUMANCD59glycoprotein(Fragment)OS=HomosapiensGN=CD59PE=1SV=1	2	4	1	11.985	47.516	23.1	30.6	12
sp|P11021|GRP78_HUMAN78kDaglucose-regulatedproteinOS=HomosapiensGN=HSPA5PE=1SV=2	2	1	2	72.332	7.8235	2.6	2.4	2.6
sp|P00338|LDHA_HUMANL-lactatedehydrogenaseAchainOS=HomosapiensGN=LDHAPE=1SV=2;tr|F5GXH2|F5GXH2_HUMANL-lactatedehydrogenaseAchain(Fragment)OS=HomosapiensGN=LDHAPE=1SV=1;tr|F5GYU2|F5GYU2_HUMANL-lactatedehydrogenaseAchain(Fragment)OS=HomosapiensGN=LDHAPE=1SV=1;tr|F5GXY2|F5GXY2_HUMANL-lactatedehydrogenaseAchain(Fragment)OS=HomosapiensGN=LDHAPE=1SV=8;tr|F5H5G7|F5H5G7_HUMANL-lactatedehydrogenaseOS=Homo…	2	2	2	36.688	16.566	6.3	6.3	6.6
sp|P00742|FA10_HUMANCoagulationfactorXOS=HomosapiensGN=F10PE=1SV=2	2	2	2	54.731	14.836	3.7	3.7	3.7
sp|P01344|IGF2_HUMANInsulin-likegrowthfactorIIOS=HomosapiensGN=IGF2PE=1SV=1	2	2	2	20.14	29.058	13.9	13.9	6.1
tr|D6RHJ6|D6RHJ6_HUMANImmunoglobulinJchain(Fragment)OS=HomosapiensGN=JCHAINPE=1SV=1;tr|D6RD17|D6RD17_HUMANImmunoglobulinJchain(Fragment)OS=HomosapiensGN=JCHAINPE=1SV=8;sp|P01591|IGJ_HUMANImmunoglobulinJchainOS=HomosapiensGN=JCHAINPE=1SV=4	2	2	2	17.679	10.663	7	7	7
tr|C9JEU5|C9JEU5_HUMANFibrinogengammachainOS=HomosapiensGN=FGGPE=1SV=1;sp|P02679|FIBG_HUMANFibrinogengammachainOS=HomosapiensGN=FGGPE=1SV=3;tr|C9JC84|C9JC84_HUMANFibrinogengammachainOS=HomosapiensGN=FGGPE=1SV=1	2	2	2	50.322	82.577	6.1	6.1	6.1
sp|P02749|APOH_HUMANBeta-2-glycoprotein1OS=HomosapiensGN=APOHPE=1SV=3	2	2	2	38.298	14.494	3.5	3.5	3.5
sp|P15259|PGAM2_HUMANPhosphoglyceratemutase2OS=HomosapiensGN=PGAM2PE=1SV=3;sp|P18669|PGAM1_HUMANPhosphoglyceratemutase1OS=HomosapiensGN=PGAM1PE=1SV=2;sp|Q8N0Y7|PGAM4_HUMANProbablephosphoglyceratemutase4OS=HomosapiensGN=PGAM4PE=3SV=1	2	2	2	28.766	12.317	9.9	9.9	9.9
sp|P46779|RL28_HUMAN60SribosomalproteinL28OS=HomosapiensGN=RPL28PE=1SV=3;tr|H0YKD8|H0YKD8_HUMAN60SribosomalproteinL28OS=HomosapiensGN=RPL28PE=1SV=1;tr|H0YLP6|H0YLP6_HUMAN60SribosomalproteinL28OS=HomosapiensGN=RPL28PE=1SV=1;tr|H0YMF4|H0YMF4_HUMAN60SribosomalproteinL28OS=HomosapiensGN=RPL28PE=1SV=1	2	2	2	15.747	40.8	6.6	11.7	11.7
tr|E9PJK1|E9PJK1_HUMANTetraspaninOS=HomosapiensGN=CD81PE=1SV=1;tr|E9PRJ8|E9PRJ8_HUMANTetraspanin(Fragment)OS=HomosapiensGN=CD81PE=1SV=1;tr|H0YDL9|H0YDL9_HUMANTetraspanin(Fragment)OS=HomosapiensGN=CD81PE=1SV=1;tr|H0YDJ9|H0YDJ9_HUMANTetraspanin(Fragment)OS=HomosapiensGN=CD81PE=1SV=1;sp|P60033|CD81_HUMANCD81antigenOS=HomosapiensGN=CD81PE=1SV=1;tr|E9PIF1|E9PIF1_HUMANTetraspaninOS=HomosapiensGN=CD81PE…	2	2	2	17.963	30.978	23.6	23.6	23.6
sp|P61604|CH10_HUMAN10kDaheatshockprotein,mitochondrialOS=HomosapiensGN=HSPE1PE=1SV=2;tr|B8ZZ54|B8ZZ54_HUMAN10kDaheatshockprotein,mitochondrialOS=HomosapiensGN=HSPE1PE=1SV=1;tr|B8ZZL8|B8ZZL8_HUMAN10kDaheatshockprotein,mitochondrialOS=HomosapiensGN=HSPE1PE=1SV=1;tr|S4R3N1|S4R3N1_HUMANHSPE1-MOB4readthroughOS=HomosapiensGN=HSPE1-MOB4PE=3SV=1	2	2	2	10.932	12.985	18.6	18.6	18.6
sp|P62318|SMD3_HUMANSmallnuclearribonucleoproteinSmD3OS=HomosapiensGN=SNRPD3PE=1SV=1;tr|H3BT13|H3BT13_HUMANSmallnuclearribonucleoproteinSmD3OS=HomosapiensGN=SNRPD3PE=1SV=1	2	2	2	13.916	10.876	12.7	12.7	12.7
sp|Q06828|FMOD_HUMANFibromodulinOS=HomosapiensGN=FMODPE=1SV=2	2	2	2	43.178	23.894	5.6	5.6	5.6
sp|Q16853|AOC3_HUMANMembraneprimaryamineoxidaseOS=HomosapiensGN=AOC3PE=1SV=3;tr|K7EQZ5|K7EQZ5_HUMANAmineoxidase(Fragment)OS=HomosapiensGN=AOC3PE=1SV=1;tr|K7EL47|K7EL47_HUMANAmineoxidase(Fragment)OS=HomosapiensGN=AOC3PE=1SV=1;sp|O75106|AOC2_HUMANRetina-specificcopperamineoxidaseOS=HomosapiensGN=AOC2PE=1SV=2	2	2	2	84.621	18.838	2.2	2.2	2.4
sp|P55072|TERA_HUMANTransitionalendoplasmicreticulumATPaseOS=HomosapiensGN=VCPPE=1SV=4	2	3	2	89.321	24.696	2.7	5	3.3
tr|E7EQV9|E7EQV9_HUMANRibosomalproteinL15(Fragment)OS=HomosapiensGN=RPL15PE=1SV=1;sp|P61313|RL15_HUMAN60SribosomalproteinL15OS=HomosapiensGN=RPL15PE=1SV=2;tr|E7EX53|E7EX53_HUMANRibosomalproteinL15(Fragment)OS=HomosapiensGN=RPL15PE=1SV=1;tr|E7ENU7|E7ENU7_HUMANRibosomalproteinL15(Fragment)OS=HomosapiensGN=RPL15PE=1SV=1;tr|E7ERA2|E7ERA2_HUMANRibosomalproteinL15OS=HomosapiensGN=RPL15PE=1SV=1	2	3	2	20.51	17.707	9.2	16.1	10.9
sp|P62269|RS18_HUMAN40SribosomalproteinS18OS=HomosapiensGN=RPS18PE=1SV=3;tr|A0A0G2JQH2|A0A0G2JQH2_HUMAN40SribosomalproteinS18OS=HomosapiensGN=RPS18PE=1SV=1;tr|Q5GGW2|Q5GGW2_HUMAN40SribosomalproteinS18OS=HomosapiensGN=RPS18PE=1SV=1	2	3	2	17.718	23.861	14.5	21.7	14.5
tr|F8W0G4|F8W0G4_HUMANPoly(rC)-bindingprotein2(Fragment)OS=HomosapiensGN=PCBP2PE=1SV=1;tr|F8VXH9|F8VXH9_HUMANPoly(rC)-bindingprotein2(Fragment)OS=HomosapiensGN=PCBP2PE=1SV=1;tr|F8W1G6|F8W1G6_HUMANPoly(rC)-bindingprotein2(Fragment)OS=HomosapiensGN=PCBP2PE=1SV=2;tr|H3BRU6|H3BRU6_HUMANPoly(rC)-bindingprotein2(Fragment)OS=HomosapiensGN=PCBP2PE=1SV=1;tr|F8VZX2|F8VZX2_HUMANPoly(rC)-bindingprotein2OS=Ho…	2	3	2	16.637	14.877	15.2	24.1	17.1
tr|A0A087WTT1|A0A087WTT1_HUMANPolyadenylate-bindingproteinOS=HomosapiensGN=PABPC1PE=1SV=1;tr|E7ERJ7|E7ERJ7_HUMANPolyadenylate-bindingproteinOS=HomosapiensGN=PABPC1PE=1SV=1;sp|P11940|PABP1_HUMANPolyadenylate-bindingprotein1OS=HomosapiensGN=PABPC1PE=1SV=2;tr|E7EQV3|E7EQV3_HUMANPolyadenylate-bindingproteinOS=HomosapiensGN=PABPC1PE=1SV=1;sp|Q9H361|PABP3_HUMANPolyadenylate-bindingprotein3OS=Homosapien…	2	4	2	58.535	32.547	5.6	8.6	4.8
sp|P35998|PRS7_HUMAN26Sproteasomeregulatorysubunit7OS=HomosapiensGN=PSMC2PE=1SV=3;tr|C9JLS9|C9JLS9_HUMAN26Sproteasomeregulatorysubunit7(Fragment)OS=HomosapiensGN=PSMC2PE=1SV=1;tr|A0A1W2PQS1|A0A1W2PQS1_HUMAN26Sproteasomeregulatorysubunit7OS=HomosapiensGN=PSMC2PE=1SV=1	2	5	2	48.633	36.519	5.1	11.5	5.1
sp|P00488|F13A_HUMANCoagulationfactorXIIIAchainOS=HomosapiensGN=F13A1PE=1SV=4;tr|Q9NQP5|Q9NQP5_HUMANCoagulationfactorXIIIAchain(Fragment)OS=HomosapiensGN=F13A1PE=1SV=2;tr|A6PVK5|A6PVK5_HUMANCoagulationfactorXIIIAchain(Fragment)OS=HomosapiensGN=F13A1PE=1SV=9	2	2	3	83.266	32.269	4	3.4	5.1
tr|C9JMY1|C9JMY1_HUMANInsulin-likegrowthfactor-bindingprotein2OS=HomosapiensGN=IGFBP2PE=1SV=1;sp|P18065|IBP2_HUMANInsulin-likegrowthfactor-bindingprotein2OS=HomosapiensGN=IGFBP2PE=1SV=2;tr|C9JW52|C9JW52_HUMANInsulin-likegrowthfactor-bindingprotein2(Fragment)OS=HomosapiensGN=IGFBP2PE=1SV=1;tr|H7C1H0|H7C1H0_HUMANInsulin-likegrowthfactor-bindingprotein2(Fragment)OS=HomosapiensGN=IGFBP2PE=1SV=1	2	2	3	20.281	49.957	13.8	11	19.3
sp|P63000|RAC1_HUMANRas-relatedC3botulinumtoxinsubstrate1OS=HomosapiensGN=RAC1PE=1SV=1;tr|B1AH77|B1AH77_HUMANRas-relatedC3botulinumtoxinsubstrate2OS=HomosapiensGN=RAC2PE=1SV=1;tr|B1AH80|B1AH80_HUMANRas-relatedC3botulinumtoxinsubstrate2OS=HomosapiensGN=RAC2PE=1SV=1;sp|P15153|RAC2_HUMANRas-relatedC3botulinumtoxinsubstrate2OS=HomosapiensGN=RAC2PE=1SV=1;tr|J3KSC4|J3KSC4_HUMANRas-relatedC3botulinumtox…	2	2	3	21.45	32.177	13	12.5	17.2
sp|P02452|CO1A1_HUMANCollagenalpha-1(I)chainOS=HomosapiensGN=COL1A1PE=1SV=5;CON__Q862S4	2	3	3	138.94	35.682	1.7	2.2	2.2
tr|Q3BDU5|Q3BDU5_HUMANPrelamin-A/COS=HomosapiensGN=LMNAPE=1SV=1;sp|P02545|LMNA_HUMANPrelamin-A/COS=HomosapiensGN=LMNAPE=1SV=1;tr|H0YAB0|H0YAB0_HUMANPrelamin-A/C(Fragment)OS=HomosapiensGN=LMNAPE=1SV=1;tr|Q5TCI8|Q5TCI8_HUMANPrelamin-A/COS=HomosapiensGN=LMNAPE=1SV=1	2	3	3	55.637	37.892	3.5	6	6.2
sp|P08514|ITA2B_HUMANIntegrinalpha-IIbOS=HomosapiensGN=ITGA2BPE=1SV=3	2	3	3	113.38	22.192	1.7	3.1	3.1
tr|F5GY03|F5GY03_HUMANSPARC(Fragment)OS=HomosapiensGN=SPARCPE=1SV=1;sp|P09486|SPRC_HUMANSPARCOS=HomosapiensGN=SPARCPE=1SV=1;tr|E5RK62|E5RK62_HUMANSPARC(Fragment)OS=HomosapiensGN=SPARCPE=1SV=1	2	3	3	17.47	25.927	19.5	26.2	26.2
tr|E7ENL6|E7ENL6_HUMANCollagenalpha-3(VI)chainOS=HomosapiensGN=COL6A3PE=1SV=2;sp|P12111|CO6A3_HUMANCollagenalpha-3(VI)chainOS=HomosapiensGN=COL6A3PE=1SV=5	2	3	3	278.11	35.31	0.7	1.2	1.3
sp|P63104|1433Z_HUMAN14-3-3proteinzeta/deltaOS=HomosapiensGN=YWHAZPE=1SV=1;tr|E7EX29|E7EX29_HUMAN14-3-3proteinzeta/delta(Fragment)OS=HomosapiensGN=YWHAZPE=1SV=1;tr|E7ESK7|E7ESK7_HUMAN14-3-3proteinzeta/delta(Fragment)OS=HomosapiensGN=YWHAZPE=1SV=1;tr|B0AZS6|B0AZS6_HUMAN14-3-3proteinzeta/deltaOS=HomosapiensGN=YWHAZPE=1SV=1;tr|E5RGE1|E5RGE1_HUMAN14-3-3proteinzeta/delta(Fragment)OS=HomosapiensGN=YWHA…	2	3	3	27.745	74.874	10.6	14.7	13.5
sp|Q8NG11|TSN14_HUMANTetraspanin-14OS=HomosapiensGN=TSPAN14PE=1SV=1;tr|H7BXY6|H7BXY6_HUMANTetraspaninOS=HomosapiensGN=TSPAN14PE=1SV=1;tr|A6NEP9|A6NEP9_HUMANTetraspanin(Fragment)OS=HomosapiensGN=TSPAN14PE=1SV=2	2	3	3	30.69	18.594	9.3	13.3	13.3
sp|P00533|EGFR_HUMANEpidermalgrowthfactorreceptorOS=HomosapiensGN=EGFRPE=1SV=2;tr|A0A1W2PRR9|A0A1W2PRR9_HUMANEpidermalgrowthfactorreceptorOS=HomosapiensGN=EGFRPE=1SV=1;tr|Q504U8|Q504U8_HUMANReceptorprotein-tyrosinekinaseOS=HomosapiensGN=EGFRPE=1SV=1;tr|E9PFD7|E9PFD7_HUMANReceptorprotein-tyrosinekinaseOS=HomosapiensGN=EGFRPE=1SV=3;tr|C9JYS6|C9JYS6_HUMANEpidermalgrowthfactorreceptor(Fragment)OS=Hom…	2	4	3	134.28	34.536	2.1	4	3.1
sp|P39023|RL3_HUMAN60SribosomalproteinL3OS=HomosapiensGN=RPL3PE=1SV=2;tr|H7C422|H7C422_HUMAN60SribosomalproteinL3(Fragment)OS=HomosapiensGN=RPL3PE=1SV=1;tr|H7C3M2|H7C3M2_HUMAN60SribosomalproteinL3(Fragment)OS=HomosapiensGN=RPL3PE=1SV=1;tr|G5E9G0|G5E9G0_HUMAN60SribosomalproteinL3OS=HomosapiensGN=RPL3PE=1SV=1;tr|F8WCR1|F8WCR1_HUMAN60SribosomalproteinL3OS=HomosapiensGN=RPL3PE=1SV=1;tr|B5MCW2|B5MCW2_…	2	4	3	46.108	38.897	8.2	11.7	9.7
sp|Q9H4M9|EHD1_HUMANEHdomain-containingprotein1OS=HomosapiensGN=EHD1PE=1SV=2;tr|A0A024R571|A0A024R571_HUMANEHdomain-containingprotein1OS=HomosapiensGN=EHD1PE=1SV=1;tr|C9J2Z4|C9J2Z4_HUMANEHdomain-containingprotein1(Fragment)OS=HomosapiensGN=EHD1PE=1SV=1;tr|C9JC03|C9JC03_HUMANEHdomain-containingprotein1(Fragment)OS=HomosapiensGN=EHD1PE=1SV=1;tr|C9JDQ8|C9JDQ8_HUMANEHdomain-containingprotein1(Fragmen…	2	5	4	60.626	9.1745	5.1	11.6	9
tr|B5MCX3|B5MCX3_HUMANSeptin-2OS=HomosapiensGN=SEPT2PE=1SV=1;sp|Q15019|SEPT2_HUMANSeptin-2OS=HomosapiensGN=SEPT2PE=1SV=1;tr|H7C2Y0|H7C2Y0_HUMANSeptin-2(Fragment)OS=HomosapiensGN=SEPT2PE=1SV=1;tr|C9J2Q4|C9J2Q4_HUMANSeptin-2(Fragment)OS=HomosapiensGN=SEPT2PE=1SV=1;tr|C9IY94|C9IY94_HUMANSeptin-2(Fragment)OS=HomosapiensGN=SEPT2PE=1SV=1;tr|C9J938|C9J938_HUMANSeptin-2(Fragment)OS=HomosapiensGN=SEPT2PE=…	2	4	5	36.94	34.914	12.5	21.8	25.2
sp|P08238|HS90B_HUMANHeatshockproteinHSP90-betaOS=HomosapiensGN=HSP90AB1PE=1SV=4;sp|Q58FF7|H90B3_HUMANPutativeheatshockproteinHSP90-beta-3OS=HomosapiensGN=HSP90AB3PPE=5SV=1;tr|F8W026|F8W026_HUMANEndoplasmin(Fragment)OS=HomosapiensGN=HSP90B1PE=1SV=8;tr|Q96GW1|Q96GW1_HUMANEndoplasminOS=HomosapiensGN=HSP90B1PE=1SV=1;tr|A0A1W2PRR1|A0A1W2PRR1_HUMANEndoplasminOS=HomosapiensGN=HSP90B1PE=1SV=1;sp|P14625|…	2	5	5	83.263	51.478	3	9.4	9.9
sp|Q9P2B2|FPRP_HUMANProstaglandinF2receptornegativeregulatorOS=HomosapiensGN=PTGFRNPE=1SV=2	2	8	5	98.555	72.1	2.4	10.5	5.7
tr|A0A087X0S5|A0A087X0S5_HUMANCollagenalpha-1(VI)chainOS=HomosapiensGN=COL6A1PE=1SV=1;sp|P12109|CO6A1_HUMANCollagenalpha-1(VI)chainOS=HomosapiensGN=COL6A1PE=1SV=3	2	6	6	108.34	74.948	2.4	7.5	8
tr|B4DHN5|B4DHN5_HUMANSyntenin-1OS=HomosapiensGN=SDCBPPE=1SV=1;tr|E9PBU7|E9PBU7_HUMANSyntenin-1OS=HomosapiensGN=SDCBPPE=1SV=1;sp|O00560|SDCB1_HUMANSyntenin-1OS=HomosapiensGN=SDCBPPE=1SV=1;tr|G5EA09|G5EA09_HUMANSyndecanbindingprotein(Syntenin),isoformCRA_aOS=HomosapiensGN=SDCBPPE=1SV=1	1	1	0	25.968	7.1184	4.2	4.2	0
tr|E9PRK8|E9PRK8_HUMANFerritinOS=HomosapiensGN=FTH1PE=1SV=1;tr|E9PKY7|E9PKY7_HUMANFerritin(Fragment)OS=HomosapiensGN=FTH1PE=1SV=1;tr|G3V192|G3V192_HUMANFerritinOS=HomosapiensGN=FTH1PE=1SV=1;sp|P02794|FRIH_HUMANFerritinheavychainOS=HomosapiensGN=FTH1PE=1SV=2;tr|E9PPQ4|E9PPQ4_HUMANFerritin(Fragment)OS=HomosapiensGN=FTH1PE=1SV=1;tr|G3V1D1|G3V1D1_HUMANFerritinOS=HomosapiensGN=FTH1PE=1SV=1	1	1	0	11.168	13.19	7.4	10.5	0
sp|P04196|HRG_HUMANHistidine-richglycoproteinOS=HomosapiensGN=HRGPE=1SV=1	1	1	0	59.578	19.741	1.3	1.3	0
sp|P10696|PPBN_HUMANAlkalinephosphatase,placental-likeOS=HomosapiensGN=ALPPL2PE=2SV=4;sp|P05187|PPB1_HUMANAlkalinephosphatase,placentaltypeOS=HomosapiensGN=ALPPPE=1SV=2;sp|P09923|PPBI_HUMANIntestinal-typealkalinephosphataseOS=HomosapiensGN=ALPIPE=1SV=2	1	1	0	57.376	14.376	1.7	1.9	0
tr|C9JB90|C9JB90_HUMANRas-relatedproteinRab-6B(Fragment)OS=HomosapiensGN=RAB6BPE=4SV=1;tr|C9JU14|C9JU14_HUMANRas-relatedproteinRab-6B(Fragment)OS=HomosapiensGN=RAB6BPE=1SV=3;tr|J3KR73|J3KR73_HUMANRas-relatedproteinRab-6B(Fragment)OS=HomosapiensGN=RAB6BPE=1SV=1;sp|Q9NRW1|RAB6B_HUMANRas-relatedproteinRab-6BOS=HomosapiensGN=RAB6BPE=1SV=1;sp|P20340|RAB6A_HUMANRas-relatedproteinRab-6AOS=HomosapiensGN=…	1	1	0	5.8575	10.585	22.4	22.4	0
tr|E9PP21|E9PP21_HUMANCysteineandglycine-richprotein1OS=HomosapiensGN=CSRP1PE=1SV=1;sp|P21291|CSRP1_HUMANCysteineandglycine-richprotein1OS=HomosapiensGN=CSRP1PE=1SV=3	1	1	0	16.94	7.0097	9.4	9.4	0
tr|J3QSB4|J3QSB4_HUMAN60SribosomalproteinL13(Fragment)OS=HomosapiensGN=RPL13PE=1SV=1;sp|P26373|RL13_HUMAN60SribosomalproteinL13OS=HomosapiensGN=RPL13PE=1SV=4	1	1	0	14.692	12.712	6.3	11.9	0
tr|C9J0K6|C9J0K6_HUMANSorcinOS=HomosapiensGN=SRIPE=1SV=1;sp|P30626|SORCN_HUMANSorcinOS=HomosapiensGN=SRIPE=1SV=1	1	1	0	17.605	7.1169	6.5	6.5	0
tr|E9PJD9|E9PJD9_HUMAN60SribosomalproteinL27aOS=HomosapiensGN=RPL27APE=1SV=1;tr|E9PLL6|E9PLL6_HUMAN60SribosomalproteinL27aOS=HomosapiensGN=RPL27APE=1SV=1;sp|P46776|RL27A_HUMAN60SribosomalproteinL27aOS=HomosapiensGN=RPL27APE=1SV=2	1	1	0	10.127	13.262	24.2	11	0
tr|G3V1B3|G3V1B3_HUMAN60SribosomalproteinL21OS=HomosapiensGN=RPL21PE=1SV=1;tr|M0R181|M0R181_HUMAN60SribosomalproteinL21(Fragment)OS=HomosapiensGN=RPL21PE=1SV=1;sp|P46778|RL21_HUMAN60SribosomalproteinL21OS=HomosapiensGN=RPL21PE=1SV=2	1	1	0	9.8864	12.716	17.2	9.2	0
tr|M0R0F0|M0R0F0_HUMAN40SribosomalproteinS5(Fragment)OS=HomosapiensGN=RPS5PE=1SV=1;sp|P46782|RS5_HUMAN40SribosomalproteinS5OS=HomosapiensGN=RPS5PE=1SV=4;tr|M0R0R2|M0R0R2_HUMAN40SribosomalproteinS5OS=HomosapiensGN=RPS5PE=1SV=1;tr|M0QZN2|M0QZN2_HUMAN40SribosomalproteinS5OS=HomosapiensGN=RPS5PE=1SV=1	1	1	0	22.391	17.792	7.5	5	0
sp|P62328|TYB4_HUMANThymosinbeta-4OS=HomosapiensGN=TMSB4XPE=1SV=2	1	1	0	5.0526	7.8662	25	25	0
tr|D6R937|D6R937_HUMANAminoacyltRNAsynthasecomplex-interactingmultifunctionalprotein1(Fragment)OS=HomosapiensGN=AIMP1PE=1SV=1;sp|Q12904|AIMP1_HUMANAminoacyltRNAsynthasecomplex-interactingmultifunctionalprotein1OS=HomosapiensGN=AIMP1PE=1SV=2	1	1	0	16.578	10.802	8	8	0
sp|Q5VT97|SYDE2_HUMANRhoGTPase-activatingproteinSYDE2OS=HomosapiensGN=SYDE2PE=1SV=2	1	1	0	133.23	-2	0.7	0.7	0
tr|F5GWG3|F5GWG3_HUMANRetinoicacid-inducedprotein3(Fragment)OS=HomosapiensGN=GPRC5APE=1SV=8;sp|Q8NFJ5|RAI3_HUMANRetinoicacid-inducedprotein3OS=HomosapiensGN=GPRC5APE=1SV=2	1	1	0	30.521	12.501	4.8	3.3	0
tr|H7C1W1|H7C1W1_HUMANPeroxidasinhomolog(Fragment)OS=HomosapiensGN=PXDNPE=1SV=1;sp|Q92626|PXDN_HUMANPeroxidasinhomologOS=HomosapiensGN=PXDNPE=1SV=2	1	1	0	79.755	7.3797	1.4	1.4	0
tr|D6R9V3|D6R9V3_HUMANCoiled-coilandC2domain-containingprotein2A(Fragment)OS=HomosapiensGN=CC2D2APE=1SV=1;sp|Q9P2K1|C2D2A_HUMANCoiled-coilandC2domain-containingprotein2AOS=HomosapiensGN=CC2D2APE=1SV=3	1	1	0	68.31	-2	2.2	2.2	0
tr|A0A0C4DGL8|A0A0C4DGL8_HUMANHaptoglobinOS=HomosapiensGN=HPPE=1SV=1;tr|J3QR68|J3QR68_HUMANHaptoglobin(Fragment)OS=HomosapiensGN=HPPE=1SV=1;sp|P00738|HPT_HUMANHaptoglobinOS=HomosapiensGN=HPPE=1SV=1;tr|H0Y300|H0Y300_HUMANHaptoglobinOS=HomosapiensGN=HPPE=1SV=4;tr|J3KTC3|J3KTC3_HUMANHaptoglobin-relatedproteinOS=HomosapiensGN=HPRPE=1SV=1;tr|H3BS21|H3BS21_HUMANHaptoglobin(Fragment)OS=HomosapiensGN=HPP…	1	2	0	38.451	15.82	2.6	6.1	0
tr|J3QRJ3|J3QRJ3_HUMANThy-1membraneglycoproteinOS=HomosapiensGN=THY1PE=1SV=1;tr|E9PIM6|E9PIM6_HUMANThy-1membraneglycoprotein(Fragment)OS=HomosapiensGN=THY1PE=1SV=8;sp|P04216|THY1_HUMANThy-1membraneglycoproteinOS=HomosapiensGN=THY1PE=1SV=2;tr|E9PNQ8|E9PNQ8_HUMANThy-1membraneglycoprotein(Fragment)OS=HomosapiensGN=THY1PE=1SV=1	1	2	0	16.149	14.275	6.9	18.1	0
sp|P13473|LAMP2_HUMANLysosome-associatedmembraneglycoprotein2OS=HomosapiensGN=LAMP2PE=1SV=2	1	2	0	44.96	11.943	2	4.9	0
tr|F5H6T1|F5H6T1_HUMANARP2actin-relatedprotein2homolog(Yeast),isoformCRA_dOS=HomosapiensGN=ACTR2PE=1SV=2;sp|P61160|ARP2_HUMANActin-relatedprotein2OS=HomosapiensGN=ACTR2PE=1SV=1	1	2	0	38.841	13.615	4.4	7.7	0
sp|Q12860|CNTN1_HUMANContactin-1OS=HomosapiensGN=CNTN1PE=1SV=1	1	3	0	113.32	19.177	1.1	3.4	0
tr|F8VR50|F8VR50_HUMANActin-relatedprotein2/3complexsubunit3(Fragment)OS=HomosapiensGN=ARPC3PE=1SV=1;tr|C9JZD1|C9JZD1_HUMANActin-relatedprotein2/3complexsubunit3(Fragment)OS=HomosapiensGN=ARPC3PE=1SV=1;sp|O15145|ARPC3_HUMANActin-relatedprotein2/3complexsubunit3OS=HomosapiensGN=ARPC3PE=1SV=3	1	0	1	9.7261	7.4366	13.1	0	13.1
sp|Q01081|U2AF1_HUMANSplicingfactorU2AF35kDasubunitOS=HomosapiensGN=U2AF1PE=1SV=3;sp|P0DN76|U2AF5_HUMANSplicingfactorU2AF35kDasubunit-likeproteinOS=HomosapiensGN=U2AF1L5PE=1SV=1	1	0	1	27.872	6.1758	5.8	0	5.8
sp|P10644|KAP0_HUMANcAMP-dependentproteinkinasetypeI-alpharegulatorysubunitOS=HomosapiensGN=PRKAR1APE=1SV=1	1	0	1	42.981	6.6282	4.7	0	4.7
sp|P80511|S10AC_HUMANProteinS100-A12OS=HomosapiensGN=S100A12PE=1SV=2	1	0	1	10.575	6.8696	21.7	0	21.7
tr|E9PQ55|E9PQ55_HUMANMyctargetprotein1OS=HomosapiensGN=MYCT1PE=4SV=1;sp|Q8N699|MYCT1_HUMANMyctargetprotein1OS=HomosapiensGN=MYCT1PE=1SV=1	1	0	1	7.8532	-2	16.4	0	16.4
sp|Q9H2G4|TSYL2_HUMANTestis-specificY-encoded-likeprotein2OS=HomosapiensGN=TSPYL2PE=1SV=1	1	0	1	79.434	7.5552	1	0	1
sp|O00232|PSD12_HUMAN26Sproteasomenon-ATPaseregulatorysubunit12OS=HomosapiensGN=PSMD12PE=1SV=3	1	1	1	52.904	6.5811	2.9	2.9	2.9
sp|O43854|EDIL3_HUMANEGF-likerepeatanddiscoidinI-likedomain-containingprotein3OS=HomosapiensGN=EDIL3PE=1SV=1	1	1	1	53.764	10.63	3.3	1.9	3.3
tr|A0A087X1L8|A0A087X1L8_HUMANUncharacterizedproteinOS=HomosapiensGN=LOC102723996PE=4SV=1;sp|O75144|ICOSL_HUMANICOSligandOS=HomosapiensGN=ICOSLGPE=1SV=2;tr|K4DIA0|K4DIA0_HUMANICOSligandOS=HomosapiensGN=ICOSLGPE=1SV=1	1	1	1	20.996	12.176	5.2	5.2	5.2
sp|O94808|GFPT2_HUMANGlutamine--fructose-6-phosphateaminotransferase[isomerizing]2OS=HomosapiensGN=GFPT2PE=1SV=3	1	1	1	76.93	6.185	1.3	1.3	1.3
tr|E9PRD9|E9PRD9_HUMANVascularnon-inflammatorymolecule2(Fragment)OS=HomosapiensGN=VNN2PE=1SV=1;tr|E9PQ75|E9PQ75_HUMANVascularnon-inflammatorymolecule2OS=HomosapiensGN=VNN2PE=1SV=1;tr|E9PL76|E9PL76_HUMANVascularnon-inflammatorymolecule2(Fragment)OS=HomosapiensGN=VNN2PE=1SV=1;tr|B4DQB2|B4DQB2_HUMANVascularnon-inflammatorymolecule2OS=HomosapiensGN=VNN2PE=1SV=1;tr|J3KQQ7|J3KQQ7_HUMANVascularnon-infla…	1	1	1	11.498	9.1197	13.7	13.7	13.7
sp|P01042|KNG1_HUMANKininogen-1OS=HomosapiensGN=KNG1PE=1SV=2	1	1	1	71.957	18.609	1.4	1.4	1.4
sp|P05386|RLA1_HUMAN60SacidicribosomalproteinP1OS=HomosapiensGN=RPLP1PE=1SV=1	1	1	1	11.514	7.2883	14	14	14
tr|H0YDD8|H0YDD8_HUMAN60SacidicribosomalproteinP2(Fragment)OS=HomosapiensGN=RPLP2PE=1SV=1;sp|P05387|RLA2_HUMAN60SacidicribosomalproteinP2OS=HomosapiensGN=RPLP2PE=1SV=1	1	1	1	8.9857	8.0082	13	13	13
sp|P06858|LIPL_HUMANLipoproteinlipaseOS=HomosapiensGN=LPLPE=1SV=1	1	1	1	53.162	8.4682	3.6	3.6	3.6
tr|F5GY80|F5GY80_HUMANComplementcomponentC8betachainOS=HomosapiensGN=C8BPE=1SV=1;tr|F5H7G1|F5H7G1_HUMANComplementcomponentC8betachainOS=HomosapiensGN=C8BPE=1SV=1;sp|P07358|CO8B_HUMANComplementcomponentC8betachainOS=HomosapiensGN=C8BPE=1SV=3	1	1	1	60.04	9.5847	2.1	2.1	2.1
sp|P08567|PLEK_HUMANPleckstrinOS=HomosapiensGN=PLEKPE=1SV=3	1	1	1	40.124	9.6285	4	4	4
sp|P09496|CLCA_HUMANClathrinlightchainAOS=HomosapiensGN=CLTAPE=1SV=1;tr|C9J8P9|C9J8P9_HUMANClathrinlightchainOS=HomosapiensGN=CLTAPE=1SV=1;tr|F8WF69|F8WF69_HUMANClathrinlightchainOS=HomosapiensGN=CLTAPE=1SV=1	1	1	1	27.076	19.195	3.2	3.2	3.6
tr|J3QSA3|J3QSA3_HUMANPolyubiquitin-B(Fragment)OS=HomosapiensGN=UBBPE=1SV=1;tr|F5GZ39|F5GZ39_HUMANPolyubiquitin-C(Fragment)OS=HomosapiensGN=UBCPE=1SV=1;tr|M0R1V7|M0R1V7_HUMANUbiquitin-60SribosomalproteinL40(Fragment)OS=HomosapiensGN=UBA52PE=1SV=1;tr|J3QS39|J3QS39_HUMANPolyubiquitin-B(Fragment)OS=HomosapiensGN=UBBPE=1SV=1;tr|Q49A90|Q49A90_HUMANRPS27AproteinOS=HomosapiensGN=RPS27APE=2SV=1;tr|J3QTR3…	1	1	1	4.8535	31.753	37.2	37.2	37.2
tr|E7EP60|E7EP60_HUMANIntegrinalpha-4(Fragment)OS=HomosapiensGN=ITGA4PE=1SV=1;sp|P13612|ITA4_HUMANIntegrinalpha-4OS=HomosapiensGN=ITGA4PE=1SV=3	1	1	1	67.508	6.3469	2.4	2.4	2.4
tr|B4DTF2|B4DTF2_HUMANAnnexinOS=HomosapiensGN=ANXA8L1PE=1SV=1;sp|Q5VT79|AXA81_HUMANAnnexinA8-likeprotein1OS=HomosapiensGN=ANXA8L1PE=2SV=2;sp|P13928|ANXA8_HUMANAnnexinA8OS=HomosapiensGN=ANXA8PE=1SV=3	1	1	1	30.492	11.745	5.9	5.9	5.9
sp|P20618|PSB1_HUMANProteasomesubunitbetatype-1OS=HomosapiensGN=PSMB1PE=1SV=2	1	1	1	26.489	10.924	8.3	8.3	8.3
tr|A0A087X1J7|A0A087X1J7_HUMANGlutathioneperoxidaseOS=HomosapiensGN=GPX3PE=1SV=1;sp|P22352|GPX3_HUMANGlutathioneperoxidase3OS=HomosapiensGN=GPX3PE=1SV=2	1	1	1	25.402	7.8511	5.3	5.3	5.3
tr|A0A087WUI2|A0A087WUI2_HUMANHeterogeneousnuclearribonucleoproteinsA2/B1OS=HomosapiensGN=HNRNPA2B1PE=1SV=1;sp|P22626|ROA2_HUMANHeterogeneousnuclearribonucleoproteinsA2/B1OS=HomosapiensGN=HNRNPA2B1PE=1SV=2	1	1	1	29.836	12.134	3.8	3.8	4.6
sp|P28300|LYOX_HUMANProtein-lysine6-oxidaseOS=HomosapiensGN=LOXPE=1SV=2	1	1	1	46.944	6.2656	1.7	1.7	1.7
sp|P31689|DNJA1_HUMANDnaJhomologsubfamilyAmember1OS=HomosapiensGN=DNAJA1PE=1SV=2	1	1	1	44.868	8.1289	3.3	3.3	3.3
tr|H0Y9R4|H0Y9R4_HUMAN60SribosomalproteinL9(Fragment)OS=HomosapiensGN=RPL9PE=1SV=1;tr|E7ESE0|E7ESE0_HUMAN60SribosomalproteinL9(Fragment)OS=HomosapiensGN=RPL9PE=1SV=1;tr|D6RAN4|D6RAN4_HUMAN60SribosomalproteinL9(Fragment)OS=HomosapiensGN=RPL9PE=1SV=8;tr|H0Y9V9|H0Y9V9_HUMAN60SribosomalproteinL9(Fragment)OS=HomosapiensGN=RPL9PE=1SV=1;sp|P32969|RL9_HUMAN60SribosomalproteinL9OS=HomosapiensGN=RPL9PE=1SV…	1	1	1	10.045	9.6682	12.1	12.1	12.1
tr|C9IZZ0|C9IZZ0_HUMANRas-relatedproteinRab-7a(Fragment)OS=HomosapiensGN=RAB7APE=1SV=1;tr|C9J592|C9J592_HUMANRas-relatedproteinRab-7a(Fragment)OS=HomosapiensGN=RAB7APE=1SV=1;tr|C9J8S3|C9J8S3_HUMANRas-relatedproteinRab-7aOS=HomosapiensGN=RAB7APE=1SV=1;sp|P51149|RAB7A_HUMANRas-relatedproteinRab-7aOS=HomosapiensGN=RAB7APE=1SV=1;tr|C9J7D1|C9J7D1_HUMANRas-relatedproteinRab-7aOS=HomosapiensGN=RAB7APE=1…	1	1	1	13.075	13.406	9.5	9.5	8.6
tr|A8MZH8|A8MZH8_HUMANPituitarytumor-transforminggene1protein-interactingproteinOS=HomosapiensGN=PTTG1IPPE=1SV=1;tr|A8MXQ1|A8MXQ1_HUMANPituitarytumor-transforminggene1protein-interactingproteinOS=HomosapiensGN=PTTG1IPPE=1SV=1;sp|P53801|PTTG_HUMANPituitarytumor-transforminggene1protein-interactingproteinOS=HomosapiensGN=PTTG1IPPE=1SV=1	1	1	1	11.598	9.4916	16.8	16.8	16.8
tr|M0QX76|M0QX76_HUMAN40SribosomalproteinS16(Fragment)OS=HomosapiensGN=RPS16PE=1SV=1;tr|M0R1M5|M0R1M5_HUMAN40SribosomalproteinS16(Fragment)OS=HomosapiensGN=RPS16PE=1SV=1;tr|M0R3H0|M0R3H0_HUMAN40SribosomalproteinS16OS=HomosapiensGN=RPS16PE=1SV=1;tr|M0R210|M0R210_HUMAN40SribosomalproteinS16OS=HomosapiensGN=RPS16PE=1SV=1;sp|P62249|RS16_HUMAN40SribosomalproteinS16OS=HomosapiensGN=RPS16PE=1SV=2;tr|Q6I…	1	1	1	5.5575	6.8021	20	20	20
tr|A0A0B4J254|A0A0B4J254_HUMANSmallnuclearribonucleoproteinFOS=HomosapiensGN=SNRPFPE=1SV=1;sp|P62306|RUXF_HUMANSmallnuclearribonucleoproteinFOS=HomosapiensGN=SNRPFPE=1SV=1;tr|F8W0W6|F8W0W6_HUMANSmallnuclearribonucleoproteinFOS=HomosapiensGN=SNRPFPE=1SV=1	1	1	1	7.6953	7.0666	31.3	31.3	31.3
tr|F8WCJ1|F8WCJ1_HUMANEukaryotictranslationinitiationfactor5AOS=HomosapiensGN=EIF5A2PE=1SV=1;tr|C9J7B5|C9J7B5_HUMANEukaryotictranslationinitiationfactor5AOS=HomosapiensGN=EIF5A2PE=1SV=1;tr|C9J4W5|C9J4W5_HUMANEukaryotictranslationinitiationfactor5A(Fragment)OS=HomosapiensGN=EIF5A2PE=1SV=1;tr|I3L397|I3L397_HUMANEukaryotictranslationinitiationfactor5A(Fragment)OS=HomosapiensGN=EIF5APE=1SV=8;sp|Q9GZV…	1	1	1	11.687	6.626	11.4	11.4	11.4
tr|I3L191|I3L191_HUMANCarboxylesterase4A(Fragment)OS=HomosapiensGN=CES4APE=4SV=2;tr|A0A0C4DGH1|A0A0C4DGH1_HUMANCarboxylicesterhydrolase(Fragment)OS=HomosapiensGN=CES4APE=3SV=1;sp|Q5XG92|EST4A_HUMANCarboxylesterase4AOS=HomosapiensGN=CES4APE=2SV=2	1	1	1	19.698	6.2185	7.3	7.3	7.3
sp|Q8IZ83|A16A1_HUMANAldehydedehydrogenasefamily16memberA1OS=HomosapiensGN=ALDH16A1PE=1SV=2	1	1	1	85.126	10.523	1.5	1.5	1.5
tr|H7C2G2|H7C2G2_HUMANNAD(P)(+)--arginineADP-ribosyltransferase(Fragment)OS=HomosapiensGN=ART4PE=1SV=1;sp|Q93070|NAR4_HUMANEcto-ADP-ribosyltransferase4OS=HomosapiensGN=ART4PE=2SV=2	1	1	1	31.511	-2	2.6	2.6	2.6
tr|E9PQI5|E9PQI5_HUMANChargedmultivesicularbodyprotein4aOS=HomosapiensGN=CHMP4APE=1SV=1;tr|E9PQ80|E9PQ80_HUMANChargedmultivesicularbodyprotein4a(Fragment)OS=HomosapiensGN=CHMP4APE=1SV=1;sp|Q9BY43|CHM4A_HUMANChargedmultivesicularbodyprotein4aOS=HomosapiensGN=CHMP4APE=1SV=3;tr|E9PSI1|E9PSI1_HUMANTransmembrane9superfamilymemberOS=HomosapiensPE=3SV=1	1	1	1	18.845	6.1568	4.2	4.2	4.2
sp|Q9H6S3|ES8L2_HUMANEpidermalgrowthfactorreceptorkinasesubstrate8-likeprotein2OS=HomosapiensGN=EPS8L2PE=1SV=2	1	1	1	80.62	6.6041	2.2	2.2	2.2
sp|Q9P126|CLC1B_HUMANC-typelectindomainfamily1memberBOS=HomosapiensGN=CLEC1BPE=1SV=2	1	1	1	26.595	6.1544	3.1	3.1	3.1
sp|Q9ULI3|HEG1_HUMANProteinHEGhomolog1OS=HomosapiensGN=HEG1PE=1SV=3;tr|H7C4M4|H7C4M4_HUMANProteinHEGhomolog1(Fragment)OS=HomosapiensGN=HEG1PE=1SV=1	1	1	1	147.46	11.534	0.6	0.6	0.6
tr|A0A087WYS3|A0A087WYS3_HUMANProteinkinaseC-bindingprotein1OS=HomosapiensGN=ZMYND8PE=1SV=1;tr|H7C4X9|H7C4X9_HUMANProteinkinaseC-bindingprotein1(Fragment)OS=HomosapiensGN=ZMYND8PE=1SV=2;tr|A0A087WVZ6|A0A087WVZ6_HUMANProteinkinaseC-bindingprotein1OS=HomosapiensGN=ZMYND8PE=1SV=2;sp|Q9ULU4|PKCB1_HUMANProteinkinaseC-bindingprotein1OS=HomosapiensGN=ZMYND8PE=1SV=2	1	1	1	121.25	-2	1.7	1.7	1.7
tr|F5GY56|F5GY56_HUMANPre-mRNA-processingfactor19(Fragment)OS=HomosapiensGN=PRPF19PE=1SV=1;sp|Q9UMS4|PRP19_HUMANPre-mRNA-processingfactor19OS=HomosapiensGN=PRPF19PE=1SV=1	1	1	1	27.718	6.7698	6.7	6.7	6.7
sp|O43294|TGFI1_HUMANTransforminggrowthfactorbeta-1-inducedtranscript1proteinOS=HomosapiensGN=TGFB1I1PE=1SV=2;tr|H3BQC4|H3BQC4_HUMANTransforminggrowthfactorbeta-1-inducedtranscript1protein(Fragment)OS=HomosapiensGN=TGFB1I1PE=1SV=8	1	2	1	49.814	13.679	2	5.4	2
tr|A2A2V1|A2A2V1_HUMANMajorprionprotein(Fragment)OS=HomosapiensGN=PRNPPE=1SV=1;sp|P04156|PRIO_HUMANMajorprionproteinOS=HomosapiensGN=PRNPPE=1SV=1	1	2	1	27.278	25.708	4.8	8	4.8
sp|P08582|TRFM_HUMANMelanotransferrinOS=HomosapiensGN=MELTFPE=1SV=2;tr|C9JVN1|C9JVN1_HUMANMelanotransferrin(Fragment)OS=HomosapiensGN=MELTFPE=1SV=1	1	2	1	80.214	24.372	2.2	3.7	2.2
sp|P11717|MPRI_HUMANCation-independentmannose-6-phosphatereceptorOS=HomosapiensGN=IGF2RPE=1SV=3	1	2	1	274.37	12.05	0.4	0.8	0.4
sp|P31939|PUR9_HUMANBifunctionalpurinebiosynthesisproteinPURHOS=HomosapiensGN=ATICPE=1SV=3;tr|C9JLK0|C9JLK0_HUMANBifunctionalpurinebiosynthesisproteinPURH(Fragment)OS=HomosapiensGN=ATICPE=1SV=1;tr|H7C1S2|H7C1S2_HUMANBifunctionalpurinebiosynthesisproteinPURH(Fragment)OS=HomosapiensGN=ATICPE=1SV=1	1	2	1	64.615	11.978	1.2	2.7	1.2
sp|P32119|PRDX2_HUMANPeroxiredoxin-2OS=HomosapiensGN=PRDX2PE=1SV=5;tr|A6NIW5|A6NIW5_HUMANPeroxiredoxin2,isoformCRA_aOS=HomosapiensGN=PRDX2PE=1SV=2	1	2	1	21.892	6.6243	5.6	14.6	5.6
tr|C9JD32|C9JD32_HUMAN60SribosomalproteinL23(Fragment)OS=HomosapiensGN=RPL23PE=1SV=1;tr|J3KT29|J3KT29_HUMAN60SribosomalproteinL23OS=HomosapiensGN=RPL23PE=1SV=1;sp|P62829|RL23_HUMAN60SribosomalproteinL23OS=HomosapiensGN=RPL23PE=1SV=1;tr|J3QQT9|J3QQT9_HUMAN60SribosomalproteinL23(Fragment)OS=HomosapiensGN=RPL23PE=1SV=1;tr|J3KTJ3|J3KTJ3_HUMAN60SribosomalproteinL23OS=HomosapiensGN=RPL23PE=1SV=1;tr|B9Z…	1	2	1	9.6694	13.716	22	33	22
tr|H3BT58|H3BT58_HUMANCoactosin-likeproteinOS=HomosapiensGN=COTL1PE=1SV=1;sp|Q14019|COTL1_HUMANCoactosin-likeproteinOS=HomosapiensGN=COTL1PE=1SV=3	1	2	1	8.2242	11.219	11	21.9	11
sp|Q15582|BGH3_HUMANTransforminggrowthfactor-beta-inducedproteinig-h3OS=HomosapiensGN=TGFBIPE=1SV=1;tr|D6RBX4|D6RBX4_HUMANTransforminggrowthfactor-beta-inducedproteinig-h3OS=HomosapiensGN=TGFBIPE=1SV=1;tr|H0YAH8|H0YAH8_HUMANTransforminggrowthfactor-beta-inducedproteinig-h3(Fragment)OS=HomosapiensGN=TGFBIPE=1SV=1;tr|H0Y8L3|H0Y8L3_HUMANTransforminggrowthfactor-beta-inducedproteinig-h3(Fragment)OS=H…	1	2	1	74.68	12.408	1.9	3.2	1.3
tr|Q5T6H7|Q5T6H7_HUMANXaa-Proaminopeptidase1OS=HomosapiensGN=XPNPEP1PE=1SV=1;sp|Q9NQW7|XPP1_HUMANXaa-Proaminopeptidase1OS=HomosapiensGN=XPNPEP1PE=1SV=3;tr|Q5T6H3|Q5T6H3_HUMANXaa-Proaminopeptidase1(Fragment)OS=HomosapiensGN=XPNPEP1PE=1SV=1;tr|Q5T6H2|Q5T6H2_HUMANXaa-Proaminopeptidase1(Fragment)OS=HomosapiensGN=XPNPEP1PE=1SV=1	1	2	1	62.138	11.826	2.5	4.2	1.6
sp|O75340|PDCD6_HUMANProgrammedcelldeathprotein6OS=HomosapiensGN=PDCD6PE=1SV=1;tr|A0A024QZ42|A0A024QZ42_HUMANHCG1985580,isoformCRA_cOS=HomosapiensGN=PDCD6PE=1SV=1	1	3	1	21.868	21.949	4.2	16.2	6.8
sp|P07814|SYEP_HUMANBifunctionalglutamate/proline--tRNAligaseOS=HomosapiensGN=EPRSPE=1SV=5;tr|V9GYZ6|V9GYZ6_HUMANBifunctionalglutamate/proline--tRNAligase(Fragment)OS=HomosapiensGN=EPRSPE=1SV=1	1	3	1	170.59	20.454	0.7	2.4	0.7
sp|P07900|HS90A_HUMANHeatshockproteinHSP90-alphaOS=HomosapiensGN=HSP90AA1PE=1SV=5;sp|Q58FG0|HS905_HUMANPutativeheatshockproteinHSP90-alphaA5OS=HomosapiensGN=HSP90AA5PPE=2SV=1	1	3	1	84.659	24.49	1.4	4.6	1.9
tr|A0A024R4M0|A0A024R4M0_HUMAN40SribosomalproteinS9OS=HomosapiensGN=RPS9PE=1SV=1;sp|P46781|RS9_HUMAN40SribosomalproteinS9OS=HomosapiensGN=RPS9PE=1SV=3;tr|B5MCT8|B5MCT8_HUMAN40SribosomalproteinS9OS=HomosapiensGN=RPS9PE=1SV=1;tr|C9JM19|C9JM19_HUMAN40SribosomalproteinS9OS=HomosapiensGN=RPS9PE=1SV=1;tr|F2Z3C0|F2Z3C0_HUMAN40SribosomalproteinS9OS=HomosapiensGN=RPS9PE=1SV=1;tr|A8MXK4|A8MXK4_HUMAN40Sribo…	1	3	1	22.591	17.07	4.1	13.9	4.6
tr|A0A0U1RQV3|A0A0U1RQV3_HUMANEGF-containingfibulin-likeextracellularmatrixprotein1(Fragment)OS=HomosapiensGN=EFEMP1PE=1SV=1;sp|Q12805|FBLN3_HUMANEGF-containingfibulin-likeextracellularmatrixprotein1OS=HomosapiensGN=EFEMP1PE=1SV=2	1	3	1	31.646	36.092	3.2	13.2	3.9
sp|P62191|PRS4_HUMAN26Sproteasomeregulatorysubunit4OS=HomosapiensGN=PSMC1PE=1SV=1	1	4	1	49.184	38.231	3.4	13.6	4.3
tr|F8WE04|F8WE04_HUMANHeatshockproteinbeta-1OS=HomosapiensGN=HSPB1PE=1SV=1;sp|P04792|HSPB1_HUMANHeatshockproteinbeta-1OS=HomosapiensGN=HSPB1PE=1SV=2	1	1	2	20.406	16.741	8.6	4.3	9.7
sp|O00231|PSD11_HUMAN26Sproteasomenon-ATPaseregulatorysubunit11OS=HomosapiensGN=PSMD11PE=1SV=3	1	2	2	47.463	18.987	2.8	5.5	5.5
tr|K7EKL8|K7EKL8_HUMANIntercellularadhesionmolecule1(Fragment)OS=HomosapiensGN=ICAM1PE=1SV=1;sp|P05362|ICAM1_HUMANIntercellularadhesionmolecule1OS=HomosapiensGN=ICAM1PE=1SV=2	1	2	2	19.443	12.197	5.6	11.7	11.7
tr|A0A087WXP3|A0A087WXP3_HUMANIntegrinbetaOS=HomosapiensGN=ITGB6PE=1SV=1;tr|E9PEE8|E9PEE8_HUMANIntegrinbetaOS=HomosapiensGN=ITGB6PE=1SV=1;sp|P18564|ITB6_HUMANIntegrinbeta-6OS=HomosapiensGN=ITGB6PE=1SV=2	1	2	2	75.849	10.996	1.3	2.3	2.3
sp|P26641|EF1G_HUMANElongationfactor1-gammaOS=HomosapiensGN=EEF1GPE=1SV=3	1	2	2	50.118	25.362	3	4.6	4.6
sp|P33176|KINH_HUMANKinesin-1heavychainOS=HomosapiensGN=KIF5BPE=1SV=1;tr|A0A0G2JMZ6|A0A0G2JMZ6_HUMANKinesin-likeprotein(Fragment)OS=HomosapiensGN=KIF5CPE=1SV=1;tr|J3KNA1|J3KNA1_HUMANKinesin-likeproteinOS=HomosapiensGN=KIF5APE=1SV=1;sp|O60282|KIF5C_HUMANKinesinheavychainisoform5COS=HomosapiensGN=KIF5CPE=1SV=1;sp|Q12840|KIF5A_HUMANKinesinheavychainisoform5AOS=HomosapiensGN=KIF5APE=1SV=2	1	2	2	109.68	15.273	1.3	2.6	2.6
sp|P40227|TCPZ_HUMANT-complexprotein1subunitzetaOS=HomosapiensGN=CCT6APE=1SV=3	1	2	2	58.024	23.815	4	6	6.2
tr|F6S6P2|F6S6P2_HUMANLargeproline-richproteinBAG6(Fragment)OS=HomosapiensGN=BAG6PE=1SV=1;tr|X6REW1|X6REW1_HUMANLargeproline-richproteinBAG6(Fragment)OS=HomosapiensGN=BAG6PE=1SV=7;tr|A0A0G2JJM1|A0A0G2JJM1_HUMANLargeproline-richproteinBAG6(Fragment)OS=HomosapiensGN=BAG6PE=1SV=4;tr|A0A0G2JL47|A0A0G2JL47_HUMANLargeproline-richproteinBAG6OS=HomosapiensGN=BAG6PE=1SV=1;tr|A0A024RCR6|A0A024RCR6_HUMANBAG…	1	2	2	54.67	19.701	2.5	4.7	4.5
sp|P51570|GALK1_HUMANGalactokinaseOS=HomosapiensGN=GALK1PE=1SV=1;tr|K7EII7|K7EII7_HUMANGalactokinase(Fragment)OS=HomosapiensGN=GALK1PE=1SV=1	1	2	2	42.272	19.297	2.8	5.4	5.1
sp|P61026|RAB10_HUMANRas-relatedproteinRab-10OS=HomosapiensGN=RAB10PE=1SV=1;tr|H0YLJ8|H0YLJ8_HUMANRas-relatedproteinRab-8BOS=HomosapiensGN=RAB8BPE=4SV=1;tr|H0YL94|H0YL94_HUMANRas-relatedproteinRab-8BOS=HomosapiensGN=RAB8BPE=4SV=1;tr|H0YMN7|H0YMN7_HUMANRas-relatedproteinRab-8BOS=HomosapiensGN=RAB8BPE=1SV=1;tr|H0YNE9|H0YNE9_HUMANRas-relatedproteinRab-8B(Fragment)OS=HomosapiensGN=RAB8BPE=1SV=1;sp|P5…	1	2	2	22.541	6.3019	5.5	11	11
tr|A0A087X2D0|A0A087X2D0_HUMANSerine/arginine-rich-splicingfactor3OS=HomosapiensGN=SRSF3PE=1SV=1;sp|P84103|SRSF3_HUMANSerine/arginine-richsplicingfactor3OS=HomosapiensGN=SRSF3PE=1SV=1;tr|A0A0B4J1Z1|A0A0B4J1Z1_HUMANSerine/arginine-rich-splicingfactor7OS=HomosapiensGN=SRSF7PE=1SV=1;tr|C9JAB2|C9JAB2_HUMANSerine/arginine-rich-splicingfactor7OS=HomosapiensGN=SRSF7PE=1SV=1;sp|Q16629|SRSF7_HUMANSerine/a…	1	2	2	10.32	16.28	27.4	24.2	36.8
sp|Q969P0|IGSF8_HUMANImmunoglobulinsuperfamilymember8OS=HomosapiensGN=IGSF8PE=1SV=1;tr|C9J8Z4|C9J8Z4_HUMANImmunoglobulinsuperfamilymember8(Fragment)OS=HomosapiensGN=IGSF8PE=1SV=1	1	2	2	65.033	15.4	3.3	5.9	5.9
sp|O14672|ADA10_HUMANDisintegrinandmetalloproteinasedomain-containingprotein10OS=HomosapiensGN=ADAM10PE=1SV=1;tr|H0YNC5|H0YNC5_HUMANDisintegrinandmetalloproteinasedomain-containingprotein10(Fragment)OS=HomosapiensGN=ADAM10PE=1SV=1	1	3	2	84.141	20.562	1.3	4.1	2.8
tr|E7EPB3|E7EPB3_HUMAN60SribosomalproteinL14OS=HomosapiensGN=RPL14PE=1SV=1;sp|P50914|RL14_HUMAN60SribosomalproteinL14OS=HomosapiensGN=RPL14PE=1SV=4	1	3	2	14.558	26.892	9.7	28.2	19.4
tr|E7END7|E7END7_HUMANRas-relatedproteinRab-1AOS=HomosapiensGN=RAB1APE=1SV=1;sp|P62820|RAB1A_HUMANRas-relatedproteinRab-1AOS=HomosapiensGN=RAB1APE=1SV=3	1	3	2	19.018	33.468	6.4	20.2	16.2
sp|P29144|TPP2_HUMANTripeptidyl-peptidase2OS=HomosapiensGN=TPP2PE=1SV=4;tr|Q5VZU9|Q5VZU9_HUMANTripeptidyl-peptidase2OS=HomosapiensGN=TPP2PE=1SV=1	1	4	2	138.35	35.867	0.8	3	1.6
sp|Q9H0U4|RAB1B_HUMANRas-relatedproteinRab-1BOS=HomosapiensGN=RAB1BPE=1SV=1;tr|E9PLD0|E9PLD0_HUMANRas-relatedproteinRab-1BOS=HomosapiensGN=RAB1BPE=1SV=1;sp|Q92928|RAB1C_HUMANPutativeRas-relatedproteinRab-1COS=HomosapiensGN=RAB1CPE=5SV=2	1	4	2	22.171	7.9262	5.5	25.9	13.9
tr|A0A087WWU8|A0A087WWU8_HUMANTropomyosinalpha-3chainOS=HomosapiensGN=TPM3PE=1SV=1;tr|Q5VU61|Q5VU61_HUMANTropomyosinalpha-3chainOS=HomosapiensGN=TPM3PE=1SV=2;tr|Q5HYB6|Q5HYB6_HUMANEpididymisluminalprotein189OS=HomosapiensGN=DKFZp686J1372PE=1SV=1;tr|J3KN67|J3KN67_HUMANTropomyosinalpha-3chainOS=HomosapiensGN=TPM3PE=1SV=1;tr|D6R904|D6R904_HUMANTropomyosinalpha-3chainOS=HomosapiensGN=TPM3PE=1SV=1;tr|…	1	1	3	26.42	12.32	3.1	3.1	19.4
tr|C9J9K3|C9J9K3_HUMAN40SribosomalproteinSA(Fragment)OS=HomosapiensGN=RPSAPE=1SV=8;sp|P08865|RSSA_HUMAN40SribosomalproteinSAOS=HomosapiensGN=RPSAPE=1SV=4;tr|A0A0C4DG17|A0A0C4DG17_HUMAN40SribosomalproteinSAOS=HomosapiensGN=RPSAPE=1SV=1	1	2	3	29.404	36.341	5.7	16	17.1
sp|P62879|GBB2_HUMANGuaninenucleotide-bindingproteinG(I)/G(S)/G(T)subunitbeta-2OS=HomosapiensGN=GNB2PE=1SV=3;tr|E7EP32|E7EP32_HUMANGuaninenucleotide-bindingproteinG(I)/G(S)/G(T)subunitbeta-2OS=HomosapiensGN=GNB2PE=1SV=1;sp|Q9HAV0|GBB4_HUMANGuaninenucleotide-bindingproteinsubunitbeta-4OS=HomosapiensGN=GNB4PE=1SV=3;tr|C9JD14|C9JD14_HUMANGuaninenucleotide-bindingproteinsubunitbeta-4(Fragment)OS=Homo…	1	2	3	37.331	21.079	6.2	7.1	13.2
sp|P04075|ALDOA_HUMANFructose-bisphosphatealdolaseAOS=HomosapiensGN=ALDOAPE=1SV=2;tr|J3KPS3|J3KPS3_HUMANFructose-bisphosphatealdolaseOS=HomosapiensGN=ALDOAPE=1SV=1;tr|H3BQN4|H3BQN4_HUMANFructose-bisphosphatealdolaseOS=HomosapiensGN=ALDOAPE=1SV=1;tr|H3BR68|H3BR68_HUMANFructose-bisphosphatealdolaseA(Fragment)OS=HomosapiensGN=ALDOAPE=1SV=1;tr|H3BMQ8|H3BMQ8_HUMANFructose-bisphosphatealdolaseA(Fragmen…	1	3	3	39.42	38.02	4.1	11.5	11.3
sp|P36871|PGM1_HUMANPhosphoglucomutase-1OS=HomosapiensGN=PGM1PE=1SV=3	1	3	3	61.448	23.449	2	5	5.5
sp|P48643|TCPE_HUMANT-complexprotein1subunitepsilonOS=HomosapiensGN=CCT5PE=1SV=1;tr|E7ENZ3|E7ENZ3_HUMANT-complexprotein1subunitepsilonOS=HomosapiensGN=CCT5PE=1SV=1;tr|B7ZAR1|B7ZAR1_HUMANT-complexprotein1subunitepsilonOS=HomosapiensGN=CCT5PE=1SV=1;tr|E9PCA1|E9PCA1_HUMANT-complexprotein1subunitepsilonOS=HomosapiensGN=CCT5PE=1SV=1;tr|D6RIZ7|D6RIZ7_HUMANT-complexprotein1subunitepsilonOS=HomosapiensGN…	1	3	3	59.67	40.983	3.5	6.8	5.9
sp|Q99832|TCPH_HUMANT-complexprotein1subunitetaOS=HomosapiensGN=CCT7PE=1SV=2;tr|F8WAM2|F8WAM2_HUMANT-complexprotein1subuniteta(Fragment)OS=HomosapiensGN=CCT7PE=1SV=1	1	3	3	59.366	33.149	1.3	6.1	7
sp|P00450|CERU_HUMANCeruloplasminOS=HomosapiensGN=CPPE=1SV=1;tr|E9PFZ2|E9PFZ2_HUMANCeruloplasminOS=HomosapiensGN=CPPE=1SV=1;tr|H7C5R1|H7C5R1_HUMANCeruloplasmin(Fragment)OS=HomosapiensGN=CPPE=1SV=1;tr|D6RE86|D6RE86_HUMANCeruloplasmin(Fragment)OS=HomosapiensGN=CPPE=1SV=8	1	4	3	122.2	11.163	1	3.8	4
sp|Q16555|DPYL2_HUMANDihydropyrimidinase-relatedprotein2OS=HomosapiensGN=DPYSL2PE=1SV=1;tr|A0A1C7CYX9|A0A1C7CYX9_HUMANDihydropyrimidinase-relatedprotein2OS=HomosapiensGN=DPYSL2PE=1SV=1;tr|E5RFU4|E5RFU4_HUMANDihydropyrimidinase-relatedprotein2(Fragment)OS=HomosapiensGN=DPYSL2PE=1SV=1	1	4	3	62.293	30.657	2.1	9.4	6.1
sp|P62873|GBB1_HUMANGuaninenucleotide-bindingproteinG(I)/G(S)/G(T)subunitbeta-1OS=HomosapiensGN=GNB1PE=1SV=3;tr|B3KVK2|B3KVK2_HUMANGuaninenucleotide-bindingproteinG(I)/G(S)/G(T)subunitbeta-1OS=HomosapiensGN=GNB1PE=1SV=1;tr|B1AKQ8|B1AKQ8_HUMANGuaninenucleotide-bindingproteinG(I)/G(S)/G(T)subunitbeta-1(Fragment)OS=HomosapiensGN=GNB1PE=1SV=8;tr|F6X3N5|F6X3N5_HUMANGuaninenucleotide-bindingproteinG(I)…	1	3	4	37.377	53.956	6.2	10.6	14.4
sp|P12110|CO6A2_HUMANCollagenalpha-2(VI)chainOS=HomosapiensGN=COL6A2PE=1SV=4;tr|H7C0M5|H7C0M5_HUMANCollagenalpha-2(VI)chain(Fragment)OS=HomosapiensGN=COL6A2PE=1SV=1	1	4	4	108.58	42.467	0.9	4.8	3.8
sp|P50552|VASP_HUMANVasodilator-stimulatedphosphoproteinOS=HomosapiensGN=VASPPE=1SV=3;tr|K7ENR7|K7ENR7_HUMANVasodilator-stimulatedphosphoprotein(Fragment)OS=HomosapiensGN=VASPPE=1SV=1;tr|K7ENL7|K7ENL7_HUMANVasodilator-stimulatedphosphoproteinOS=HomosapiensGN=VASPPE=1SV=1	1	4	4	39.829	33.677	3.4	13.2	13.7
tr|E7ES19|E7ES19_HUMANThrombospondin-4OS=HomosapiensGN=THBS4PE=1SV=1;sp|P35443|TSP4_HUMANThrombospondin-4OS=HomosapiensGN=THBS4PE=1SV=2	1	4	5	96.005	32.482	1.1	6.2	7.1
sp|P53396|ACLY_HUMANATP-citratesynthaseOS=HomosapiensGN=ACLYPE=1SV=3;tr|K7ESG8|K7ESG8_HUMANATP-citratesynthase(Fragment)OS=HomosapiensGN=ACLYPE=1SV=1	1	5	5	120.84	44.433	1.3	5.3	5.2
tr|E9PK47|E9PK47_HUMANAlpha-1,4glucanphosphorylaseOS=HomosapiensGN=PYGLPE=1SV=1;sp|P06737|PYGL_HUMANGlycogenphosphorylase,liverformOS=HomosapiensGN=PYGLPE=1SV=4;sp|P11217|PYGM_HUMANGlycogenphosphorylase,muscleformOS=HomosapiensGN=PYGMPE=1SV=6;tr|H0Y4Z6|H0Y4Z6_HUMANAlpha-1,4glucanphosphorylase(Fragment)OS=HomosapiensGN=PYGBPE=1SV=1	1	4	7	94.069	49.407	1.7	5.1	7.6
sp|P24821|TENA_HUMANTenascinOS=HomosapiensGN=TNCPE=1SV=3;tr|E9PC84|E9PC84_HUMANTenascinOS=HomosapiensGN=TNCPE=1SV=1;tr|J3QSU6|J3QSU6_HUMANTenascinOS=HomosapiensGN=TNCPE=1SV=1;tr|F5H7V9|F5H7V9_HUMANTenascinOS=HomosapiensGN=TNCPE=1SV=1;tr|H0YGZ3|H0YGZ3_HUMANTenascin(Fragment)OS=HomosapiensGN=TNCPE=1SV=1	1	15	11	240.85	177.42	1.1	8.5	7.1
tr|E9PSH3|E9PSH3_HUMANTetraspanin-4(Fragment)OS=HomosapiensGN=TSPAN4PE=1SV=1;tr|E9PN41|E9PN41_HUMANTetraspanin-4(Fragment)OS=HomosapiensGN=TSPAN4PE=1SV=1;tr|E9PPX8|E9PPX8_HUMANTetraspanin(Fragment)OS=HomosapiensGN=TSPAN4PE=1SV=1;tr|A8MVV6|A8MVV6_HUMANTetraspaninOS=HomosapiensGN=TSPAN4PE=1SV=1;sp|O14817|TSN4_HUMANTetraspanin-4OS=HomosapiensGN=TSPAN4PE=1SV=1;tr|J3KQ42|J3KQ42_HUMANTetraspaninOS=Homo…	0	1	1	11.326	18.638	0	25	25
sp|P19105|ML12A_HUMANMyosinregulatorylightchain12AOS=HomosapiensGN=MYL12APE=1SV=2;sp|O14950|ML12B_HUMANMyosinregulatorylightchain12BOS=HomosapiensGN=MYL12BPE=1SV=2;tr|J3QRS3|J3QRS3_HUMANMyosinregulatorylightchain12AOS=HomosapiensGN=MYL12APE=1SV=1	0	1	1	19.794	7.5985	0	5.8	5.8
sp|P00491|PNPH_HUMANPurinenucleosidephosphorylaseOS=HomosapiensGN=PNPPE=1SV=2	0	1	1	32.118	6.6333	0	3.5	3.5
tr|Q9BS19|Q9BS19_HUMANHPXproteinOS=HomosapiensGN=HPXPE=1SV=1;sp|P02790|HEMO_HUMANHemopexinOS=HomosapiensGN=HPXPE=1SV=2	0	1	1	28.63	11.699	0	5.1	5.1
sp|P03952|KLKB1_HUMANPlasmakallikreinOS=HomosapiensGN=KLKB1PE=1SV=1;tr|H0YAC1|H0YAC1_HUMANPlasmakallikrein(Fragment)OS=HomosapiensGN=KLKB1PE=1SV=1	0	1	1	71.369	6.8726	0	1.4	1.4
tr|K7EM90|K7EM90_HUMANAlpha-enolase(Fragment)OS=HomosapiensGN=ENO1PE=1SV=1;sp|P06733|ENOA_HUMANAlpha-enolaseOS=HomosapiensGN=ENO1PE=1SV=2;tr|K7ERS8|K7ERS8_HUMANAlpha-enolase(Fragment)OS=HomosapiensGN=ENO1PE=1SV=8;tr|F5H1C3|F5H1C3_HUMANGamma-enolase(Fragment)OS=HomosapiensGN=ENO2PE=1SV=1;tr|E5RI09|E5RI09_HUMANBeta-enolase(Fragment)OS=HomosapiensGN=ENO3PE=1SV=1;tr|E5RG95|E5RG95_HUMANBeta-enolase(Fr…	0	1	1	21.02	18.438	0	9.2	5.1
sp|P0DJD0|RGPD1_HUMANRANBP2-likeandGRIPdomain-containingprotein1OS=HomosapiensGN=RGPD1PE=2SV=1;tr|F8VYC4|F8VYC4_HUMANRANBP2-likeandGRIPdomain-containingprotein1OS=HomosapiensGN=RGPD1PE=4SV=1;tr|A0A1W2PNU4|A0A1W2PNU4_HUMANRANBP2-likeandGRIPdomain-containingprotein2OS=HomosapiensGN=RGPD2PE=4SV=1;sp|P0DJD1|RGPD2_HUMANRANBP2-likeandGRIPdomain-containingprotein2OS=HomosapiensGN=RGPD2PE=2SV=1	0	1	1	196.66	-2	0	0.6	0.6
sp|P12955|PEPD_HUMANXaa-ProdipeptidaseOS=HomosapiensGN=PEPDPE=1SV=3	0	1	1	54.548	7.1895	0	2	2
sp|P19320|VCAM1_HUMANVascularcelladhesionprotein1OS=HomosapiensGN=VCAM1PE=1SV=1;tr|E9PDD2|E9PDD2_HUMANVascularcelladhesionprotein1OS=HomosapiensGN=VCAM1PE=1SV=1	0	1	1	81.275	10.949	0	0.9	1.4
sp|P22314|UBA1_HUMANUbiquitin-likemodifier-activatingenzyme1OS=HomosapiensGN=UBA1PE=1SV=3;tr|Q5JRR6|Q5JRR6_HUMANUbiquitin-likemodifier-activatingenzyme1OS=HomosapiensGN=UBA1PE=1SV=1	0	1	1	117.85	21.532	0	1.3	1
tr|H0YJP3|H0YJP3_HUMANTryptophan--tRNAligase,cytoplasmic(Fragment)OS=HomosapiensGN=WARSPE=1SV=1;sp|P23381|SYWC_HUMANTryptophan--tRNAligase,cytoplasmicOS=HomosapiensGN=WARSPE=1SV=2	0	1	1	20.016	11.311	0	9.2	9.2
tr|A0A087X1D0|A0A087X1D0_HUMANCD40antigen(TNFreceptorsuperfamilymember5),isoformCRA_cOS=HomosapiensGN=CD40PE=1SV=1;tr|H0YE23|H0YE23_HUMANTumornecrosisfactorreceptorsuperfamilymember5(Fragment)OS=HomosapiensGN=CD40PE=1SV=1;sp|P25942|TNR5_HUMANTumornecrosisfactorreceptorsuperfamilymember5OS=HomosapiensGN=CD40PE=1SV=1	0	1	1	17.035	6.8231	0	6	6
tr|H7C0F8|H7C0F8_HUMANHepatocytegrowthfactor-likeprotein(Fragment)OS=HomosapiensGN=MST1PE=1SV=1;sp|P26927|HGFL_HUMANHepatocytegrowthfactor-likeproteinOS=HomosapiensGN=MST1PE=1SV=2;tr|G3XAK1|G3XAK1_HUMANHepatocytegrowthfactor-likeproteinOS=HomosapiensGN=MST1PE=1SV=1	0	1	1	20.983	6.4155	0	7.2	7.2
tr|H3BQV2|H3BQV2_HUMAN26Sproteasomenon-ATPaseregulatorysubunit7OS=HomosapiensGN=PSMD7PE=1SV=1;tr|H3BNT7|H3BNT7_HUMAN26Sproteasomenon-ATPaseregulatorysubunit7OS=HomosapiensGN=PSMD7PE=1SV=1;tr|H3BTM8|H3BTM8_HUMAN26Sproteasomenon-ATPaseregulatorysubunit7OS=HomosapiensGN=PSMD7PE=1SV=1;sp|P51665|PSMD7_HUMAN26Sproteasomenon-ATPaseregulatorysubunit7OS=HomosapiensGN=PSMD7PE=1SV=2	0	1	1	4.7576	9.4641	0	39.5	39.5
sp|P55263|ADK_HUMANAdenosinekinaseOS=HomosapiensGN=ADKPE=1SV=2	0	1	1	40.545	12.407	0	4.4	3
sp|P61981|1433G_HUMAN14-3-3proteingammaOS=HomosapiensGN=YWHAGPE=1SV=2	0	1	1	28.302	6.6612	0	4	4
sp|P62913|RL11_HUMAN60SribosomalproteinL11OS=HomosapiensGN=RPL11PE=1SV=2;tr|Q5VVC9|Q5VVC9_HUMAN60SribosomalproteinL11(Fragment)OS=HomosapiensGN=RPL11PE=1SV=1;tr|Q5VVC8|Q5VVC8_HUMAN60SribosomalproteinL11(Fragment)OS=HomosapiensGN=RPL11PE=1SV=1	0	1	1	20.252	14.237	0	7.9	7.9
tr|F8WES2|F8WES2_HUMANS-methyl-5'-thioadenosinephosphorylaseOS=HomosapiensGN=MTAPPE=4SV=1;tr|F2Z2F3|F2Z2F3_HUMANUncharacterizedproteinOS=HomosapiensPE=4SV=1;tr|J3QSB7|J3QSB7_HUMANPurinenucleosidephosphorylaseOS=HomosapiensGN=MTAPPE=1SV=1;sp|Q13126|MTAP_HUMANS-methyl-5'-thioadenosinephosphorylaseOS=HomosapiensGN=MTAPPE=1SV=2;tr|B4DUC8|B4DUC8_HUMANS-methyl-5'-thioadenosinephosphorylaseOS=Homosapien…	0	1	1	5.2379	7.8355	0	36	36
sp|Q13535|ATR_HUMANSerine/threonine-proteinkinaseATROS=HomosapiensGN=ATRPE=1SV=3	0	1	1	301.36	-2	0	0.4	0.4
tr|E5RFZ8|E5RFZ8_HUMANZinctransporterZIP14(Fragment)OS=HomosapiensGN=SLC39A14PE=1SV=1;tr|E5RGA7|E5RGA7_HUMANZinctransporterZIP14(Fragment)OS=HomosapiensGN=SLC39A14PE=1SV=1;tr|E5RJ40|E5RJ40_HUMANZinctransporterZIP14(Fragment)OS=HomosapiensGN=SLC39A14PE=1SV=1;tr|E5RJG5|E5RJG5_HUMANZinctransporterZIP14(Fragment)OS=HomosapiensGN=SLC39A14PE=1SV=1;tr|E5RIP4|E5RIP4_HUMANZinctransporterZIP14(Fragment)OS=…	0	1	1	9.632	6.3889	0	14.6	14.6
sp|Q16401|PSMD5_HUMAN26Sproteasomenon-ATPaseregulatorysubunit5OS=HomosapiensGN=PSMD5PE=1SV=3	0	1	1	56.195	8.3809	0	2.6	2.6
sp|Q6PEW1|ZCH12_HUMANZincfingerCCHCdomain-containingprotein12OS=HomosapiensGN=ZCCHC12PE=1SV=2	0	1	1	45.369	-2	0	3.7	3.7
tr|H0Y512|H0Y512_HUMANAdipocyteplasmamembrane-associatedprotein(Fragment)OS=HomosapiensGN=APMAPPE=1SV=1;sp|Q9HDC9|APMAP_HUMANAdipocyteplasmamembrane-associatedproteinOS=HomosapiensGN=APMAPPE=1SV=2	0	1	1	45.294	6.2656	0	1.7	1.7
tr|B3KP42|B3KP42_HUMANDNArepair-scaffoldingproteinOS=HomosapiensGN=SPIDRPE=1SV=1	0	1	1	42.77	-2	0	3.3	3.3
sp|O00187|MASP2_HUMANMannan-bindinglectinserineprotease2OS=HomosapiensGN=MASP2PE=1SV=4	0	2	1	75.702	15.286	0	3.4	2.2
sp|O95497|VNN1_HUMANPantetheinaseOS=HomosapiensGN=VNN1PE=1SV=2	0	2	1	57.011	25.266	0	5.5	3.7
sp|P03951|FA11_HUMANCoagulationfactorXIOS=HomosapiensGN=F11PE=1SV=1;tr|X6R3B1|X6R3B1_HUMANCoagulationfactorXI(Fragment)OS=HomosapiensGN=F11PE=1SV=1	0	2	1	70.108	12.932	0	1.4	1.4
tr|M0QXS5|M0QXS5_HUMANHeterogeneousnuclearribonucleoproteinL(Fragment)OS=HomosapiensGN=HNRNPLPE=1SV=1;sp|P14866|HNRPL_HUMANHeterogeneousnuclearribonucleoproteinLOS=HomosapiensGN=HNRNPLPE=1SV=2;tr|M0QYT0|M0QYT0_HUMANUncharacterizedprotein(Fragment)OS=HomosapiensPE=1SV=1	0	2	1	58.362	10.356	0	4.7	2.6
sp|P27348|1433T_HUMAN14-3-3proteinthetaOS=HomosapiensGN=YWHAQPE=1SV=1;tr|E9PG15|E9PG15_HUMAN14-3-3proteintheta(Fragment)OS=HomosapiensGN=YWHAQPE=1SV=1	0	2	1	27.764	16.974	0	9	4.1
sp|Q9UHD8|SEPT9_HUMANSeptin-9OS=HomosapiensGN=SEPT9PE=1SV=2;tr|K7EJ51|K7EJ51_HUMANSeptin-9(Fragment)OS=HomosapiensGN=SEPT9PE=1SV=1;tr|K7ER14|K7ER14_HUMANSeptin-9(Fragment)OS=HomosapiensGN=SEPT9PE=1SV=1;tr|K7EJL9|K7EJL9_HUMANSeptin-9OS=HomosapiensGN=SEPT9PE=1SV=1;tr|K7EK18|K7EK18_HUMANSeptin-9(Fragment)OS=HomosapiensGN=SEPT9PE=1SV=1;tr|K7EL40|K7EL40_HUMANSeptin-9(Fragment)OS=HomosapiensGN=SEPT9PE=…	0	2	1	65.401	10.528	0	4.3	1.7
sp|P21399|ACOC_HUMANCytoplasmicaconitatehydrataseOS=HomosapiensGN=ACO1PE=1SV=3	0	3	1	98.398	27.937	0	4.6	2.1
tr|F8VS58|F8VS58_HUMAN60SacidicribosomalproteinP0(Fragment)OS=HomosapiensGN=RPLP0PE=1SV=1;tr|F8VQY6|F8VQY6_HUMAN60SacidicribosomalproteinP0OS=HomosapiensGN=RPLP0PE=1SV=1;tr|F8VRK7|F8VRK7_HUMAN60SacidicribosomalproteinP0OS=HomosapiensGN=RPLP0PE=1SV=1;tr|G3V210|G3V210_HUMAN60SacidicribosomalproteinP0OS=HomosapiensGN=RPLP0PE=1SV=1;tr|F8VZS0|F8VZS0_HUMAN60SacidicribosomalproteinP0(Fragment)OS=Homosap…	0	1	2	13.828	11.738	0	8.3	17.4
sp|P36578|RL4_HUMAN60SribosomalproteinL4OS=HomosapiensGN=RPL4PE=1SV=5;tr|H3BM89|H3BM89_HUMAN60SribosomalproteinL4OS=HomosapiensGN=RPL4PE=1SV=1;tr|H3BTP7|H3BTP7_HUMAN60SribosomalproteinL4(Fragment)OS=HomosapiensGN=RPL4PE=1SV=1;tr|H3BU31|H3BU31_HUMAN60SribosomalproteinL4(Fragment)OS=HomosapiensGN=RPL4PE=1SV=1	0	1	2	47.697	17.899	0	2.3	4.7
tr|D6R9B6|D6R9B6_HUMAN40SribosomalproteinS3aOS=HomosapiensGN=RPS3APE=1SV=1;tr|D6RB09|D6RB09_HUMAN40SribosomalproteinS3a(Fragment)OS=HomosapiensGN=RPS3APE=1SV=8;tr|H0Y9Y4|H0Y9Y4_HUMAN40SribosomalproteinS3a(Fragment)OS=HomosapiensGN=RPS3APE=1SV=1;tr|D6RG13|D6RG13_HUMAN40SribosomalproteinS3a(Fragment)OS=HomosapiensGN=RPS3APE=1SV=1;tr|D6RAT0|D6RAT0_HUMAN40SribosomalproteinS3aOS=HomosapiensGN=RPS3APE=…	0	1	2	16.536	11.613	0	9.7	15.2
tr|A0A087WYS1|A0A087WYS1_HUMANUTP--glucose-1-phosphateuridylyltransferaseOS=HomosapiensGN=UGP2PE=1SV=1;sp|Q16851|UGPA_HUMANUTP--glucose-1-phosphateuridylyltransferaseOS=HomosapiensGN=UGP2PE=1SV=5;tr|E7EUC7|E7EUC7_HUMANUTP--glucose-1-phosphateuridylyltransferaseOS=HomosapiensGN=UGP2PE=1SV=1	0	1	2	56.967	11.129	0	1.8	3.1
sp|Q92820|GGH_HUMANGamma-glutamylhydrolaseOS=HomosapiensGN=GGHPE=1SV=2	0	1	2	35.964	35.593	0	3.1	6
sp|Q9Y240|CLC11_HUMANC-typelectindomainfamily11memberAOS=HomosapiensGN=CLEC11APE=1SV=1;tr|V9H0X6|V9H0X6_HUMANC-typelectindomainfamily11memberAOS=HomosapiensGN=CLEC11APE=1SV=1;tr|M0R081|M0R081_HUMANC-typelectindomainfamily11memberAOS=HomosapiensGN=CLEC11APE=1SV=1	0	2	2	35.694	19.928	0	5.6	5.9
sp|P62701|RS4X_HUMAN40SribosomalproteinS4,XisoformOS=HomosapiensGN=RPS4XPE=1SV=2;tr|C9JEH7|C9JEH7_HUMAN40SribosomalproteinS4,Yisoform1(Fragment)OS=HomosapiensGN=RPS4Y1PE=1SV=1;sp|Q8TD47|RS4Y2_HUMAN40SribosomalproteinS4,Yisoform2OS=HomosapiensGN=RPS4Y2PE=2SV=3;sp|P22090|RS4Y1_HUMAN40SribosomalproteinS4,Yisoform1OS=HomosapiensGN=RPS4Y1PE=1SV=2	0	4	2	29.597	21.789	0	11	4.6
sp|Q9BXJ4|C1QT3_HUMANComplementC1qtumornecrosisfactor-relatedprotein3OS=HomosapiensGN=C1QTNF3PE=1SV=1;tr|E9PGA6|E9PGA6_HUMANC1QTNF3-AMACRreadthrough(NMDcandidate)OS=HomosapiensGN=C1QTNF3-AMACRPE=4SV=1	0	4	2	26.994	27.685	0	15.9	6.5
sp|P06756|ITAV_HUMANIntegrinalpha-VOS=HomosapiensGN=ITGAVPE=1SV=2	0	3	3	116.04	28.747	0	3.9	3.6
sp|Q8WWI5|CTL1_HUMANCholinetransporter-likeprotein1OS=HomosapiensGN=SLC44A1PE=1SV=1	0	3	3	73.301	23.69	0	4.7	4.7
sp|P11216|PYGB_HUMANGlycogenphosphorylase,brainformOS=HomosapiensGN=PYGBPE=1SV=5	0	3	5	96.695	6.8467	0	4	4.6
Delta

## Sheet: HBEEVs
Protein IDs	Peptides WT1	Peptides WT2	Peptides WT3	Mol. weight [kDa]	Score	Sequence coverage WT1 [%]	Sequence coverage WT2 [%]	Sequence coverage WT3 [%]
sp|P02751|FINC_HUMANFibronectinOS=HomosapiensGN=FN1PE=1SV=4;tr|H0Y7Z1|H0Y7Z1_HUMANFibronectin(Fragment)OS=HomosapiensGN=FN1PE=1SV=1;tr|H0Y4K8|H0Y4K8_HUMANFibronectin(Fragment)OS=HomosapiensGN=FN1PE=1SV=1	39	26	10	262.62	323.31	22.7	13.7	4.8
sp|Q9Y490|TLN1_HUMANTalin-1OS=HomosapiensGN=TLN1PE=1SV=3;sp|Q9Y4G6|TLN2_HUMANTalin-2OS=HomosapiensGN=TLN2PE=1SV=4;tr|A0A1B0GVU7|A0A1B0GVU7_HUMANTalin-2OS=HomosapiensGN=TLN2PE=1SV=1;tr|H0YMT1|H0YMT1_HUMANTalin-2(Fragment)OS=HomosapiensGN=TLN2PE=1SV=1	31	15	4	269.76	323.31	17.4	7.4	1.9
sp|P07996|TSP1_HUMANThrombospondin-1OS=HomosapiensGN=THBS1PE=1SV=2;tr|A8MZG1|A8MZG1_HUMANThrombospondin-1(Fragment)OS=HomosapiensGN=THBS1PE=1SV=1;sp|P35442|TSP2_HUMANThrombospondin-2OS=HomosapiensGN=THBS2PE=1SV=2	23	14	5	129.38	323.31	21.6	13.8	4.8
sp|P68363|TBA1B_HUMANTubulinalpha-1BchainOS=HomosapiensGN=TUBA1BPE=1SV=1;tr|F8VVB9|F8VVB9_HUMANTubulinalpha-1Bchain(Fragment)OS=HomosapiensGN=TUBA1BPE=1SV=8;tr|F8VRZ4|F8VRZ4_HUMANTubulinalpha-1Achain(Fragment)OS=HomosapiensGN=TUBA1APE=3SV=1;tr|F8VS66|F8VS66_HUMANTubulinalpha-1CchainOS=HomosapiensGN=TUBA1CPE=4SV=1;tr|F8VWV9|F8VWV9_HUMANTubulinalpha-1Bchain(Fragment)OS=HomosapiensGN=TUBA1BPE=1SV=1;…	21	7	16	50.151	323.31	59.9	20	40.4
sp|P68366|TBA4A_HUMANTubulinalpha-4AchainOS=HomosapiensGN=TUBA4APE=1SV=1;tr|C9JEV8|C9JEV8_HUMANTubulinalphachain(Fragment)OS=HomosapiensGN=TUBA4APE=1SV=1;tr|C9JQ00|C9JQ00_HUMANTubulinalphachain(Fragment)OS=HomosapiensGN=TUBA4APE=1SV=1;tr|C9JJQ8|C9JJQ8_HUMANTubulinalphachain(Fragment)OS=HomosapiensGN=TUBA4APE=1SV=1;tr|C9JDL2|C9JDL2_HUMANTubulinalpha-4Achain(Fragment)OS=HomosapiensGN=TUBA4APE=1SV=8	20	7	13	49.924	139.87	58	21.4	33.5
sp|Q71U36|TBA1A_HUMANTubulinalpha-1AchainOS=HomosapiensGN=TUBA1APE=1SV=1;sp|Q13748|TBA3C_HUMANTubulinalpha-3C/DchainOS=HomosapiensGN=TUBA3CPE=1SV=3;sp|Q6PEY2|TBA3E_HUMANTubulinalpha-3EchainOS=HomosapiensGN=TUBA3EPE=1SV=2;tr|F8VQQ4|F8VQQ4_HUMANTubulinalphachain(Fragment)OS=HomosapiensGN=TUBA1APE=1SV=1;tr|V9GZ17|V9GZ17_HUMANTubulinalpha-8chain(Fragment)OS=HomosapiensGN=TUBA8PE=1SV=1	19	7	15	50.135	16.989	56.5	20	40.4
sp|P60709|ACTB_HUMANActin,cytoplasmic1OS=HomosapiensGN=ACTBPE=1SV=1;tr|G5E9R0|G5E9R0_HUMANActin,cytoplasmic1OS=HomosapiensGN=ACTBPE=1SV=1;tr|E7EVS6|E7EVS6_HUMANActin,cytoplasmic1(Fragment)OS=HomosapiensGN=ACTBPE=1SV=8;tr|C9JZR7|C9JZR7_HUMANActin,cytoplasmic1(Fragment)OS=HomosapiensGN=ACTBPE=1SV=8;tr|C9JTX5|C9JTX5_HUMANActin,cytoplasmic1(Fragment)OS=HomosapiensGN=ACTBPE=1SV=1;tr|C9JUM1|C9JUM1_HUMA…	16	17	18	41.736	323.31	60	49.9	42.7
sp|P63261|ACTG_HUMANActin,cytoplasmic2OS=HomosapiensGN=ACTG1PE=1SV=1;tr|I3L3I0|I3L3I0_HUMANActin,cytoplasmic2(Fragment)OS=HomosapiensGN=ACTG1PE=1SV=1;tr|I3L1U9|I3L1U9_HUMANActin,cytoplasmic2(Fragment)OS=HomosapiensGN=ACTG1PE=1SV=1;tr|I3L4N8|I3L4N8_HUMANActin,cytoplasmic2(Fragment)OS=HomosapiensGN=ACTG1PE=1SV=8;tr|K7EM38|K7EM38_HUMANActin,cytoplasmic2(Fragment)OS=HomosapiensGN=ACTG1PE=1SV=1;tr|I3L…	16	16	18	41.792	47.37	60	45.3	42.7
sp|Q07954|LRP1_HUMANProlow-densitylipoproteinreceptor-relatedprotein1OS=HomosapiensGN=LRP1PE=1SV=2;tr|H0YJI8|H0YJI8_HUMANProlow-densitylipoproteinreceptor-relatedprotein1(Fragment)OS=HomosapiensGN=LRP1PE=1SV=1;tr|Q6PJ72|Q6PJ72_HUMANLRP1proteinOS=HomosapiensGN=LRP1PE=1SV=1	16	4	1	504.6	244.27	4.1	0.7	0.3
sp|P68371|TBB4B_HUMANTubulinbeta-4BchainOS=HomosapiensGN=TUBB4BPE=1SV=1;sp|P04350|TBB4A_HUMANTubulinbeta-4AchainOS=HomosapiensGN=TUBB4APE=1SV=2;tr|M0R2D3|M0R2D3_HUMANTubulinbeta-4Achain(Fragment)OS=HomosapiensGN=TUBB4APE=1SV=1;sp|A6NNZ2|TBB8L_HUMANTubulinbeta-8chain-likeproteinLOC260334OS=HomosapiensPE=1SV=1;tr|M0QY85|M0QY85_HUMANTubulinbeta-4Achain(Fragment)OS=HomosapiensGN=TUBB4APE=1SV=1;tr|M0R…	15	9	11	49.83	323.31	38.7	24.9	34.6
tr|Q5HY54|Q5HY54_HUMANFilamin-AOS=HomosapiensGN=FLNAPE=1SV=1;tr|Q60FE5|Q60FE5_HUMANFilamin-AOS=HomosapiensGN=FLNAPE=1SV=1;sp|P21333|FLNA_HUMANFilamin-AOS=HomosapiensGN=FLNAPE=1SV=4;tr|A0A087WWY3|A0A087WWY3_HUMANFilamin-AOS=HomosapiensGN=FLNAPE=1SV=1;tr|F8WE98|F8WE98_HUMANFilamin-A(Fragment)OS=HomosapiensGN=FLNAPE=1SV=2;sp|Q14315|FLNC_HUMANFilamin-COS=HomosapiensGN=FLNCPE=1SV=3;tr|H0Y5F3|H0Y5F3_HU…	14	4	2	276.55	323.31	6	1.6	0.9
tr|Q5JP53|Q5JP53_HUMANTubulinbetachainOS=HomosapiensGN=TUBBPE=1SV=1;sp|P07437|TBB5_HUMANTubulinbetachainOS=HomosapiensGN=TUBBPE=1SV=2;tr|Q5ST81|Q5ST81_HUMANTubulinbetachainOS=HomosapiensGN=TUBBPE=1SV=1;tr|G3V5W4|G3V5W4_HUMANTubulinbeta-3chainOS=HomosapiensGN=TUBB3PE=1SV=1;tr|G3V2R8|G3V2R8_HUMANHCG1983504,isoformCRA_eOS=HomosapiensGN=TUBB3PE=1SV=1;tr|G3V3R4|G3V3R4_HUMANHCG1983504,isoformCRA_cOS=Ho…	14	8	11	47.766	120.12	39.4	21.6	35.9
sp|Q00610|CLH1_HUMANClathrinheavychain1OS=HomosapiensGN=CLTCPE=1SV=5;tr|A0A087WVQ6|A0A087WVQ6_HUMANClathrinheavychainOS=HomosapiensGN=CLTCPE=1SV=1;tr|J3KS13|J3KS13_HUMANClathrinheavychain1OS=HomosapiensGN=CLTCPE=1SV=1;tr|A0A087WX41|A0A087WX41_HUMANClathrinheavychain2OS=HomosapiensGN=CLTCL1PE=1SV=1;sp|P53675|CLH2_HUMANClathrinheavychain2OS=HomosapiensGN=CLTCL1PE=1SV=2;tr|K7EJJ5|K7EJJ5_HUMANClathri…	13	2	9	191.61	323.31	9.1	1.4	6.1
sp|P35579|MYH9_HUMANMyosin-9OS=HomosapiensGN=MYH9PE=1SV=4;sp|P35749|MYH11_HUMANMyosin-11OS=HomosapiensGN=MYH11PE=1SV=3;tr|Q5BKV1|Q5BKV1_HUMANMYH9proteinOS=HomosapiensGN=MYH9PE=1SV=1;tr|B1AH99|B1AH99_HUMANMyosin-9(Fragment)OS=HomosapiensGN=MYH9PE=1SV=1;sp|Q7Z406|MYH14_HUMANMyosin-14OS=HomosapiensGN=MYH14PE=1SV=2;tr|A0A0C4DFM8|A0A0C4DFM8_HUMANMyosin-14OS=HomosapiensGN=MYH14PE=1SV=1;tr|A1L2Z2|A1L2Z2…	11	1	3	226.53	323.31	6.9	0.5	2.2
sp|P68133|ACTS_HUMANActin,alphaskeletalmuscleOS=HomosapiensGN=ACTA1PE=1SV=1;sp|P68032|ACTC_HUMANActin,alphacardiacmuscle1OS=HomosapiensGN=ACTC1PE=1SV=1;tr|A6NL76|A6NL76_HUMANActin,alphaskeletalmuscleOS=HomosapiensGN=ACTA1PE=1SV=3;sp|P63267|ACTH_HUMANActin,gamma-entericsmoothmuscleOS=HomosapiensGN=ACTG2PE=1SV=1;sp|P62736|ACTA_HUMANActin,aorticsmoothmuscleOS=HomosapiensGN=ACTA2PE=1SV=1;tr|F8WB63|F8…	11	15	14	42.051	99.739	28.1	31	30.5
sp|Q08380|LG3BP_HUMANGalectin-3-bindingproteinOS=HomosapiensGN=LGALS3BPPE=1SV=1;tr|K7EP36|K7EP36_HUMANGalectin-3-bindingprotein(Fragment)OS=HomosapiensGN=LGALS3BPPE=1SV=1;tr|K7ESM3|K7ESM3_HUMANGalectin-3-bindingprotein(Fragment)OS=HomosapiensGN=LGALS3BPPE=1SV=1;tr|K7EKQ5|K7EKQ5_HUMANGalectin-3-bindingproteinOS=HomosapiensGN=LGALS3BPPE=1SV=1;tr|K7ERZ6|K7ERZ6_HUMANGalectin-3-bindingproteinOS=Homosa…	11	1	1	65.33	323.31	27.9	1.7	1.4
sp|Q08431|MFGM_HUMANLactadherinOS=HomosapiensGN=MFGE8PE=1SV=2;tr|F5GZN3|F5GZN3_HUMANLactadherinOS=HomosapiensGN=MFGE8PE=1SV=1;tr|X6R3G6|X6R3G6_HUMANLactadherinOS=HomosapiensGN=MFGE8PE=1SV=1;tr|H0YKS8|H0YKS8_HUMANLactadherin(Fragment)OS=HomosapiensGN=MFGE8PE=1SV=1;tr|A0A087WUV5|A0A087WUV5_HUMANLactadherin(Fragment)OS=HomosapiensGN=MFGE8PE=1SV=1	11	2	0	43.122	190.32	37.7	6.5	0
sp|Q9BVA1|TBB2B_HUMANTubulinbeta-2BchainOS=HomosapiensGN=TUBB2BPE=1SV=1;sp|Q13885|TBB2A_HUMANTubulinbeta-2AchainOS=HomosapiensGN=TUBB2APE=1SV=1	9	5	5	49.953	-2	22.9	10.8	16.4
sp|P05106|ITB3_HUMANIntegrinbeta-3OS=HomosapiensGN=ITGB3PE=1SV=2;tr|H3BM21|H3BM21_HUMANIntegrinbeta(Fragment)OS=HomosapiensPE=3SV=1;tr|I3L4X8|I3L4X8_HUMANIntegrinbetaOS=HomosapiensGN=ITGB3PE=3SV=1	9	7	2	87.057	271.3	14.5	11.4	2.9
sp|P04406|G3P_HUMANGlyceraldehyde-3-phosphatedehydrogenaseOS=HomosapiensGN=GAPDHPE=1SV=3;tr|E7EUT5|E7EUT5_HUMANGlyceraldehyde-3-phosphatedehydrogenaseOS=HomosapiensGN=GAPDHPE=1SV=1;sp|O14556|G3PT_HUMANGlyceraldehyde-3-phosphatedehydrogenase,testis-specificOS=HomosapiensGN=GAPDHSPE=1SV=2	8	3	4	36.053	280.87	23.6	9.3	10.1
sp|P02771|FETA_HUMANAlpha-fetoproteinOS=HomosapiensGN=AFPPE=1SV=1;tr|J3KMX3|J3KMX3_HUMANAlpha-fetoproteinOS=HomosapiensGN=AFPPE=1SV=1	8	7	5	68.677	6.7276	8.5	7.4	4.8
sp|Q13418|ILK_HUMANIntegrin-linkedproteinkinaseOS=HomosapiensGN=ILKPE=1SV=2;tr|A0A0A0MTH3|A0A0A0MTH3_HUMANIntegrin-linkedproteinkinaseOS=HomosapiensGN=ILKPE=1SV=1;tr|A0A087WWY6|A0A087WWY6_HUMANIntegrin-linkedproteinkinase(Fragment)OS=HomosapiensGN=ILKPE=1SV=1;tr|E9PQ52|E9PQ52_HUMANIntegrin-linkedproteinkinaseOS=HomosapiensGN=ILKPE=1SV=1;tr|A0A087WW45|A0A087WW45_HUMANIntegrin-linkedproteinkinaseOS…	7	4	0	51.419	197.86	20.4	9.3	0
tr|A0A140TA49|A0A140TA49_HUMANComplementC4-AOS=HomosapiensGN=C4APE=1SV=1;tr|A0A140TA44|A0A140TA44_HUMANComplementC4-AOS=HomosapiensGN=C4APE=1SV=1;tr|A0A140TA32|A0A140TA32_HUMANComplementC4-AOS=HomosapiensGN=C4APE=1SV=1;tr|A0A0G2JPR0|A0A0G2JPR0_HUMANComplementC4-AOS=HomosapiensGN=C4APE=1SV=1;sp|P0C0L4|CO4A_HUMANComplementC4-AOS=HomosapiensGN=C4APE=1SV=2;tr|F5GXS0|F5GXS0_HUMANComplementC4-BOS=Homos…	7	1	2	187.79	39.619	4.8	0.5	1.1
sp|P11142|HSP7C_HUMANHeatshockcognate71kDaproteinOS=HomosapiensGN=HSPA8PE=1SV=1;tr|E9PKE3|E9PKE3_HUMANHeatshockcognate71kDaproteinOS=HomosapiensGN=HSPA8PE=1SV=1;tr|E9PN89|E9PN89_HUMANHeatshockcognate71kDaprotein(Fragment)OS=HomosapiensGN=HSPA8PE=1SV=1;tr|E9PNE6|E9PNE6_HUMANHeatshockcognate71kDaproteinOS=HomosapiensGN=HSPA8PE=1SV=1;sp|P54652|HSP72_HUMANHeatshock-related70kDaprotein2OS=HomosapiensG…	7	3	1	70.897	167.01	14.7	5.9	2.6
sp|P01024|CO3_HUMANComplementC3OS=HomosapiensGN=C3PE=1SV=2	7	3	1	187.15	17.8	3.6	1.7	0.6
sp|Q3ZCM7|TBB8_HUMANTubulinbeta-8chainOS=HomosapiensGN=TUBB8PE=1SV=2;tr|A0A075B736|A0A075B736_HUMANTubulinbetachainOS=HomosapiensGN=TUBB8PE=1SV=1;tr|Q5SQY0|Q5SQY0_HUMANTubulinbetachainOS=HomosapiensGN=TUBB8PE=1SV=1	7	6	4	49.775	29.675	18.2	18.5	15.5
sp|P04264|K2C1_HUMANKeratin,typeIIcytoskeletal1OS=HomosapiensGN=KRT1PE=1SV=6;CON__P04264	6	3	4	66.038	312.46	11.3	4.5	6.1
sp|P14618|KPYM_HUMANPyruvatekinasePKMOS=HomosapiensGN=PKMPE=1SV=4;tr|B4DNK4|B4DNK4_HUMANPyruvatekinaseOS=HomosapiensGN=PKMPE=1SV=1;tr|H3BQ34|H3BQ34_HUMANPyruvatekinaseOS=HomosapiensGN=PKMPE=1SV=1;tr|H3BT25|H3BT25_HUMANPyruvatekinasePKM(Fragment)OS=HomosapiensGN=PKMPE=1SV=1;tr|H3BUW1|H3BUW1_HUMANPyruvatekinasePKM(Fragment)OS=HomosapiensGN=PKMPE=1SV=1;tr|H3BTJ2|H3BTJ2_HUMANPyruvatekinasePKM(Fragmen…	6	4	3	57.936	238.64	16.2	10.4	6
sp|Q9BUF5|TBB6_HUMANTubulinbeta-6chainOS=HomosapiensGN=TUBB6PE=1SV=1;tr|K7ESM5|K7ESM5_HUMANTubulinbetachain(Fragment)OS=HomosapiensGN=TUBB6PE=1SV=1	6	5	2	49.857	7.3884	14.6	10.8	4.9
tr|A0A087X0S5|A0A087X0S5_HUMANCollagenalpha-1(VI)chainOS=HomosapiensGN=COL6A1PE=1SV=1;sp|P12109|CO6A1_HUMANCollagenalpha-1(VI)chainOS=HomosapiensGN=COL6A1PE=1SV=3	6	4	1	108.34	74.948	7.7	6.1	1.4
sp|Q29940|1B59_HUMANHLAclassIhistocompatibilityantigen,B-59alphachainOS=HomosapiensGN=HLA-BPE=1SV=1;sp|P30493|1B55_HUMANHLAclassIhistocompatibilityantigen,B-55alphachainOS=HomosapiensGN=HLA-BPE=1SV=1;sp|P30492|1B54_HUMANHLAclassIhistocompatibilityantigen,B-54alphachainOS=HomosapiensGN=HLA-BPE=1SV=1;sp|P30495|1B56_HUMANHLAclassIhistocompatibilityantigen,B-56alphachainOS=HomosapiensGN=HLA-BPE=1SV=1…	5	2	1	40.584	7.9028	18.5	6.6	3.6
sp|P01023|A2MG_HUMANAlpha-2-macroglobulinOS=HomosapiensGN=A2MPE=1SV=3	5	6	2	163.29	18.375	3.5	3.5	1.2
sp|P37802|TAGL2_HUMANTransgelin-2OS=HomosapiensGN=TAGLN2PE=1SV=3;tr|X6RJP6|X6RJP6_HUMANTransgelin-2(Fragment)OS=HomosapiensGN=TAGLN2PE=1SV=1;tr|C9J5W6|C9J5W6_HUMANTransgelin-3OS=HomosapiensGN=TAGLN3PE=1SV=1;sp|Q9UI15|TAGL3_HUMANTransgelin-3OS=HomosapiensGN=TAGLN3PE=1SV=2	5	2	2	22.391	143.24	30.7	11.6	11.6
sp|P61224|RAP1B_HUMANRas-relatedproteinRap-1bOS=HomosapiensGN=RAP1BPE=1SV=1;tr|F5H823|F5H823_HUMANRas-relatedproteinRap-1b(Fragment)OS=HomosapiensGN=RAP1BPE=1SV=1;tr|B7ZB78|B7ZB78_HUMANRas-relatedproteinRap-1bOS=HomosapiensGN=RAP1BPE=1SV=1;tr|F5GZG1|F5GZG1_HUMANRas-relatedproteinRap-1b(Fragment)OS=HomosapiensGN=RAP1BPE=1SV=8;tr|E7ESV4|E7ESV4_HUMANRas-relatedproteinRap-1b(Fragment)OS=HomosapiensGN…	5	3	1	20.825	142.64	28.8	20.7	7.6
tr|G3V1N2|G3V1N2_HUMANHCG1745306,isoformCRA_aOS=HomosapiensGN=HBA2PE=1SV=1;sp|P69905|HBA_HUMANHemoglobinsubunitalphaOS=HomosapiensGN=HBA1PE=1SV=2	5	6	5	11.948	12.306	30.9	41.8	41.8
sp|P23526|SAHH_HUMANAdenosylhomocysteinaseOS=HomosapiensGN=AHCYPE=1SV=4	5	1	1	47.716	119.28	10.9	3.5	1.6
sp|P13746|1A11_HUMANHLAclassIhistocompatibilityantigen,A-11alphachainOS=HomosapiensGN=HLA-APE=1SV=1;tr|Q5SRN7|Q5SRN7_HUMANHLAclassIhistocompatibilityantigen,A-3alphachainOS=HomosapiensGN=HLA-APE=1SV=2;tr|A0A1W2PS24|A0A1W2PS24_HUMANHLAclassIhistocompatibilityantigen,A-3alphachainOS=HomosapiensGN=HLA-APE=1SV=1;sp|P04439|1A03_HUMANHLAclassIhistocompatibilityantigen,A-3alphachainOS=HomosapiensGN=HLA-…	4	1	0	40.936	232.16	15.1	3	0
sp|P30453|1A34_HUMANHLAclassIhistocompatibilityantigen,A-34alphachainOS=HomosapiensGN=HLA-APE=1SV=1;sp|P30457|1A66_HUMANHLAclassIhistocompatibilityantigen,A-66alphachainOS=HomosapiensGN=HLA-APE=1SV=1;sp|P10316|1A69_HUMANHLAclassIhistocompatibilityantigen,A-69alphachainOS=HomosapiensGN=HLA-APE=1SV=2;sp|P01891|1A68_HUMANHLAclassIhistocompatibilityantigen,A-68alphachainOS=HomosapiensGN=HLA-APE=1SV=4…	4	2	1	41.054	90.678	14.8	6.6	3.6
sp|P30508|1C12_HUMANHLAclassIhistocompatibilityantigen,Cw-12alphachainOS=HomosapiensGN=HLA-CPE=1SV=2;sp|Q07000|1C15_HUMANHLAclassIhistocompatibilityantigen,Cw-15alphachainOS=HomosapiensGN=HLA-CPE=1SV=1;tr|A0A1W2PRZ0|A0A1W2PRZ0_HUMANHLAclassIhistocompatibilityantigen,Cw-6alphachainOS=HomosapiensGN=HLA-CPE=1SV=1;tr|A0A140T937|A0A140T937_HUMANHLAclassIhistocompatibilityantigen,Cw-6alphachainOS=Homos…	4	3	3	40.885	7.4872	13.7	9.6	9.6
sp|P30462|1B14_HUMANHLAclassIhistocompatibilityantigen,B-14alphachainOS=HomosapiensGN=HLA-BPE=1SV=1;sp|P30480|1B42_HUMANHLAclassIhistocompatibilityantigen,B-42alphachainOS=HomosapiensGN=HLA-BPE=1SV=1;sp|P30466|1B18_HUMANHLAclassIhistocompatibilityantigen,B-18alphachainOS=HomosapiensGN=HLA-BPE=1SV=1;sp|P01889|1B07_HUMANHLAclassIhistocompatibilityantigen,B-7alphachainOS=HomosapiensGN=HLA-BPE=1SV=3;…	4	2	1	40.358	22.678	15.5	6.6	3.6
sp|P30685|1B35_HUMANHLAclassIhistocompatibilityantigen,B-35alphachainOS=HomosapiensGN=HLA-BPE=1SV=1;sp|P30491|1B53_HUMANHLAclassIhistocompatibilityantigen,B-53alphachainOS=HomosapiensGN=HLA-BPE=1SV=1;sp|P10319|1B58_HUMANHLAclassIhistocompatibilityantigen,B-58alphachainOS=HomosapiensGN=HLA-BPE=1SV=1;sp|P30481|1B44_HUMANHLAclassIhistocompatibilityantigen,B-44alphachainOS=HomosapiensGN=HLA-BPE=1SV=1…	4	2	1	40.455	109.77	15.2	6.1	3
sp|P0DMV9|HS71B_HUMANHeatshock70kDaprotein1BOS=HomosapiensGN=HSPA1BPE=1SV=1;sp|P0DMV8|HS71A_HUMANHeatshock70kDaprotein1AOS=HomosapiensGN=HSPA1APE=1SV=1;tr|A0A0G2JIW1|A0A0G2JIW1_HUMANHeatshock70kDaprotein1BOS=HomosapiensGN=HSPA1BPE=1SV=1;tr|V9GZ37|V9GZ37_HUMANHeatshock70kDaprotein1AOS=HomosapiensGN=HSPA1APE=1SV=1	4	1	1	70.051	96.897	7.6	1.4	1.9
sp|P05556|ITB1_HUMANIntegrinbeta-1OS=HomosapiensGN=ITGB1PE=1SV=2;tr|C9JPK5|C9JPK5_HUMANIntegrinbeta-1(Fragment)OS=HomosapiensGN=ITGB1PE=1SV=1;tr|H7C4N8|H7C4N8_HUMANIntegrinbeta-1(Fragment)OS=HomosapiensGN=ITGB1PE=1SV=1;tr|Q5T3E6|Q5T3E6_HUMANIntegrinbeta-1(Fragment)OS=HomosapiensGN=ITGB1PE=1SV=1;tr|E9PLR6|E9PLR6_HUMANIntegrinbeta-1(Fragment)OS=HomosapiensGN=ITGB1PE=1SV=1;tr|E7EUI6|E7EUI6_HUMANInte…	4	3	1	88.414	154.4	6.1	4.3	1.3
tr|H3BTN5|H3BTN5_HUMANPyruvatekinase(Fragment)OS=HomosapiensGN=PKMPE=1SV=1	4	3	3	53.045	12.225	9.7	6.8	6.6
sp|P17066|HSP76_HUMANHeatshock70kDaprotein6OS=HomosapiensGN=HSPA6PE=1SV=2;sp|P48741|HSP77_HUMANPutativeheatshock70kDaprotein7OS=HomosapiensGN=HSPA7PE=5SV=2	4	1	1	71.027	13.211	7.6	1.4	1.9
sp|Q99878|H2A1J_HUMANHistoneH2Atype1-JOS=HomosapiensGN=HIST1H2AJPE=1SV=3;sp|Q96KK5|H2A1H_HUMANHistoneH2Atype1-HOS=HomosapiensGN=HIST1H2AHPE=1SV=3;sp|Q9BTM1|H2AJ_HUMANHistoneH2A.JOS=HomosapiensGN=H2AFJPE=1SV=1;sp|Q16777|H2A2C_HUMANHistoneH2Atype2-COS=HomosapiensGN=HIST2H2ACPE=1SV=4;sp|Q6FI13|H2A2A_HUMANHistoneH2Atype2-AOS=HomosapiensGN=HIST2H2AA3PE=1SV=3;sp|P0C0S8|H2A1_HUMANHistoneH2Atype1OS=Homos…	4	2	2	13.936	77.878	35.9	9.4	14.8
sp|Q5VTE0|EF1A3_HUMANPutativeelongationfactor1-alpha-like3OS=HomosapiensGN=EEF1A1P5PE=5SV=1;sp|P68104|EF1A1_HUMANElongationfactor1-alpha1OS=HomosapiensGN=EEF1A1PE=1SV=1;tr|A0A087WVQ9|A0A087WVQ9_HUMANElongationfactor1-alpha1OS=HomosapiensGN=EEF1A1PE=1SV=1;tr|A0A087WV01|A0A087WV01_HUMANElongationfactor1-alphaOS=HomosapiensGN=EEF1A1PE=1SV=1;tr|A6PW80|A6PW80_HUMANElongationfactor1-alpha1(Fragment)OS=…	4	1	4	50.184	89.647	11.5	2.4	12.3
sp|P02765|FETUA_HUMANAlpha-2-HS-glycoproteinOS=HomosapiensGN=AHSGPE=1SV=1;tr|C9JV77|C9JV77_HUMANAlpha-2-HS-glycoproteinOS=HomosapiensGN=AHSGPE=1SV=1	4	4	4	39.324	6.9484	7.1	7.1	10.9
tr|A0A087WTA8|A0A087WTA8_HUMANCollagenalpha-2(I)chainOS=HomosapiensGN=COL1A2PE=1SV=1;sp|P08123|CO1A2_HUMANCollagenalpha-2(I)chainOS=HomosapiensGN=COL1A2PE=1SV=7	4	2	0	129.15	72.459	4.8	2.3	0
sp|P62826|RAN_HUMANGTP-bindingnuclearproteinRanOS=HomosapiensGN=RANPE=1SV=3;tr|B5MDF5|B5MDF5_HUMANGTP-bindingnuclearproteinRanOS=HomosapiensGN=RANPE=1SV=1;tr|J3KQE5|J3KQE5_HUMANGTP-bindingnuclearproteinRan(Fragment)OS=HomosapiensGN=RANPE=1SV=1;tr|F5H018|F5H018_HUMANGTP-bindingnuclearproteinRan(Fragment)OS=HomosapiensGN=RANPE=1SV=8;tr|H0YFC6|H0YFC6_HUMANGTP-bindingnuclearproteinRan(Fragment)OS=Hom…	4	1	0	24.423	85.05	23.6	6.5	0
sp|P00558|PGK1_HUMANPhosphoglyceratekinase1OS=HomosapiensGN=PGK1PE=1SV=3;sp|P07205|PGK2_HUMANPhosphoglyceratekinase2OS=HomosapiensGN=PGK2PE=1SV=3	4	2	0	44.614	93.605	13.2	6.2	0
tr|E7ES19|E7ES19_HUMANThrombospondin-4OS=HomosapiensGN=THBS4PE=1SV=1;sp|P35443|TSP4_HUMANThrombospondin-4OS=HomosapiensGN=THBS4PE=1SV=2	4	3	1	96.005	32.482	6.2	4.3	1.1
sp|P24821|TENA_HUMANTenascinOS=HomosapiensGN=TNCPE=1SV=3;tr|E9PC84|E9PC84_HUMANTenascinOS=HomosapiensGN=TNCPE=1SV=1;tr|J3QSU6|J3QSU6_HUMANTenascinOS=HomosapiensGN=TNCPE=1SV=1;tr|F5H7V9|F5H7V9_HUMANTenascinOS=HomosapiensGN=TNCPE=1SV=1;tr|H0YGZ3|H0YGZ3_HUMANTenascin(Fragment)OS=HomosapiensGN=TNCPE=1SV=1	4	1	0	240.85	177.42	1.9	0.5	0
sp|P16190|1A33_HUMANHLAclassIhistocompatibilityantigen,A-33alphachainOS=HomosapiensGN=HLA-APE=1SV=3	3	2	1	40.891	23.106	11.8	6.6	3.6
sp|P62805|H4_HUMANHistoneH4OS=HomosapiensGN=HIST1H4APE=1SV=2	3	1	2	11.367	136.39	32	7.8	25.2
tr|H9KV75|H9KV75_HUMANAlpha-actinin-1OS=HomosapiensGN=ACTN1PE=1SV=1;sp|P12814|ACTN1_HUMANAlpha-actinin-1OS=HomosapiensGN=ACTN1PE=1SV=2;sp|O43707|ACTN4_HUMANAlpha-actinin-4OS=HomosapiensGN=ACTN4PE=1SV=2;tr|H7C5W8|H7C5W8_HUMANAlpha-actinin-1(Fragment)OS=HomosapiensGN=ACTN1PE=1SV=1;tr|H0YJ11|H0YJ11_HUMANAlpha-actinin-1(Fragment)OS=HomosapiensGN=ACTN1PE=1SV=1;tr|G3V2W4|G3V2W4_HUMANAlpha-actinin-1(Fra…	3	1	0	94.825	104.51	4.1	1.6	0
sp|P04114|APOB_HUMANApolipoproteinB-100OS=HomosapiensGN=APOBPE=1SV=2	3	0	1	515.6	12.875	0.7	0	0.2
sp|P62937|PPIA_HUMANPeptidyl-prolylcis-transisomeraseAOS=HomosapiensGN=PPIAPE=1SV=2;tr|F8WE65|F8WE65_HUMANPeptidyl-prolylcis-transisomeraseOS=HomosapiensGN=PPIAPE=1SV=1;tr|C9J5S7|C9J5S7_HUMANPeptidyl-prolylcis-transisomeraseOS=HomosapiensGN=PPIAPE=1SV=1	3	1	1	18.012	51.639	15.2	7.3	10.9
sp|P04004|VTNC_HUMANVitronectinOS=HomosapiensGN=VTNPE=1SV=1	3	4	4	54.305	8.5947	5.2	9.2	7.7
sp|Q05639|EF1A2_HUMANElongationfactor1-alpha2OS=HomosapiensGN=EEF1A2PE=1SV=1	3	1	3	50.47	13.181	6.3	2.4	6.3
sp|O75369|FLNB_HUMANFilamin-BOS=HomosapiensGN=FLNBPE=1SV=2;tr|E7EN95|E7EN95_HUMANFilamin-BOS=HomosapiensGN=FLNBPE=1SV=1	3	1	0	278.16	6.4348	1	0.3	0
tr|Q5VY30|Q5VY30_HUMANRetinolbindingprotein4,plasma,isoformCRA_bOS=HomosapiensGN=RBP4PE=1SV=2;sp|P02753|RET4_HUMANRetinol-bindingprotein4OS=HomosapiensGN=RBP4PE=1SV=3	3	6	8	22.974	100	10.1	18.6	18.6
tr|A0A087X208|A0A087X208_HUMANAgrinOS=HomosapiensGN=AGRNPE=1SV=1;sp|O00468|AGRIN_HUMANAgrinOS=HomosapiensGN=AGRNPE=1SV=5	3	0	2	202.29	66.575	1.6	0	1.1
sp|P13224|GP1BB_HUMANPlateletglycoproteinIbbetachainOS=HomosapiensGN=GP1BBPE=1SV=1	3	0	1	21.717	22.631	10.7	0	4.4
sp|Q06828|FMOD_HUMANFibromodulinOS=HomosapiensGN=FMODPE=1SV=2	3	1	1	43.178	23.894	8.5	3.5	3.5
tr|C9JMY1|C9JMY1_HUMANInsulin-likegrowthfactor-bindingprotein2OS=HomosapiensGN=IGFBP2PE=1SV=1;sp|P18065|IBP2_HUMANInsulin-likegrowthfactor-bindingprotein2OS=HomosapiensGN=IGFBP2PE=1SV=2;tr|C9JW52|C9JW52_HUMANInsulin-likegrowthfactor-bindingprotein2(Fragment)OS=HomosapiensGN=IGFBP2PE=1SV=1;tr|H7C1H0|H7C1H0_HUMANInsulin-likegrowthfactor-bindingprotein2(Fragment)OS=HomosapiensGN=IGFBP2PE=1SV=1	3	3	0	20.281	49.957	18.8	15.5	0
sp|P02452|CO1A1_HUMANCollagenalpha-1(I)chainOS=HomosapiensGN=COL1A1PE=1SV=5;CON__Q862S4	3	1	0	138.94	35.682	2.5	0.5	0
tr|A0A0U1RQV3|A0A0U1RQV3_HUMANEGF-containingfibulin-likeextracellularmatrixprotein1(Fragment)OS=HomosapiensGN=EFEMP1PE=1SV=1;sp|Q12805|FBLN3_HUMANEGF-containingfibulin-likeextracellularmatrixprotein1OS=HomosapiensGN=EFEMP1PE=1SV=2	3	1	0	31.646	36.092	11.8	3.9	0
sp|P30501|1C02_HUMANHLAclassIhistocompatibilityantigen,Cw-2alphachainOS=HomosapiensGN=HLA-CPE=1SV=1	2	1	1	41.094	9.0321	6.8	3	3
sp|Q99879|H2B1M_HUMANHistoneH2Btype1-MOS=HomosapiensGN=HIST1H2BMPE=1SV=3;sp|Q99877|H2B1N_HUMANHistoneH2Btype1-NOS=HomosapiensGN=HIST1H2BNPE=1SV=3;sp|Q93079|H2B1H_HUMANHistoneH2Btype1-HOS=HomosapiensGN=HIST1H2BHPE=1SV=3;sp|Q5QNW6|H2B2F_HUMANHistoneH2Btype2-FOS=HomosapiensGN=HIST2H2BFPE=1SV=3;sp|P62807|H2B1C_HUMANHistoneH2Btype1-C/E/F/G/IOS=HomosapiensGN=HIST1H2BCPE=1SV=4;sp|P58876|H2B1D_HUMANHisto…	2	0	1	13.989	94.301	19	0	11.1
tr|F8W1R7|F8W1R7_HUMANMyosinlightpolypeptide6OS=HomosapiensGN=MYL6PE=1SV=1;sp|P60660|MYL6_HUMANMyosinlightpolypeptide6OS=HomosapiensGN=MYL6PE=1SV=2;tr|J3KND3|J3KND3_HUMANMyosinlightpolypeptide6OS=HomosapiensGN=MYL6PE=1SV=1;tr|G8JLA2|G8JLA2_HUMANMyosinlightpolypeptide6OS=HomosapiensGN=MYL6PE=1SV=1;tr|G3V1V0|G3V1V0_HUMANMyosinlightpolypeptide6OS=HomosapiensGN=MYL6PE=1SV=1;tr|B7Z6Z4|B7Z6Z4_HUMANMyos…	2	0	1	16.29	59.288	15.2	0	9
tr|F5GZS6|F5GZS6_HUMAN4F2cell-surfaceantigenheavychainOS=HomosapiensGN=SLC3A2PE=1SV=1;sp|P08195|4F2_HUMAN4F2cell-surfaceantigenheavychainOS=HomosapiensGN=SLC3A2PE=1SV=3;tr|J3KPF3|J3KPF3_HUMAN4F2cell-surfaceantigenheavychainOS=HomosapiensGN=SLC3A2PE=1SV=1;tr|F5GZI0|F5GZI0_HUMAN4F2cell-surfaceantigenheavychainOS=HomosapiensGN=SLC3A2PE=1SV=1;tr|H0YFX4|H0YFX4_HUMAN4F2cell-surfaceantigenheavychain(Fra…	2	0	1	64.872	41.167	3.5	0	2.3
sp|P78371|TCPB_HUMANT-complexprotein1subunitbetaOS=HomosapiensGN=CCT2PE=1SV=4;tr|F8VQ14|F8VQ14_HUMANT-complexprotein1subunitbetaOS=HomosapiensGN=CCT2PE=1SV=1;tr|F5GWF6|F5GWF6_HUMANT-complexprotein1subunitbetaOS=HomosapiensGN=CCT2PE=1SV=2	2	3	0	57.488	100.44	5	4.3	0
tr|E7EQB2|E7EQB2_HUMANLactotransferrin(Fragment)OS=HomosapiensGN=LTFPE=1SV=1;tr|E7ER44|E7ER44_HUMANLactotransferrinOS=HomosapiensGN=LTFPE=1SV=1;sp|P02788|TRFL_HUMANLactotransferrinOS=HomosapiensGN=LTFPE=1SV=6	2	3	3	76.625	6.6743	3	2.6	4.2
sp|P02786|TFR1_HUMANTransferrinreceptorprotein1OS=HomosapiensGN=TFRCPE=1SV=2;tr|G3V0E5|G3V0E5_HUMANTransferrinreceptor(P90,CD71),isoformCRA_cOS=HomosapiensGN=TFRCPE=1SV=1;tr|F8WBE5|F8WBE5_HUMANTransferrinreceptorprotein1OS=HomosapiensGN=TFRCPE=1SV=1	2	1	1	84.87	39.202	3.3	2.1	2.1
sp|P50990|TCPQ_HUMANT-complexprotein1subunitthetaOS=HomosapiensGN=CCT8PE=1SV=4;tr|H7C4C8|H7C4C8_HUMANT-complexprotein1subunittheta(Fragment)OS=HomosapiensGN=CCT8PE=1SV=1;tr|H7C2U0|H7C2U0_HUMANT-complexprotein1subunittheta(Fragment)OS=HomosapiensGN=CCT8PE=1SV=1	2	0	0	59.62	48.712	4.7	0	0
sp|P23229|ITA6_HUMANIntegrinalpha-6OS=HomosapiensGN=ITGA6PE=1SV=5;tr|C9JXX7|C9JXX7_HUMANIntegrinalpha-6(Fragment)OS=HomosapiensGN=ITGA6PE=1SV=1;tr|H7BZ97|H7BZ97_HUMANIntegrinalpha-6(Fragment)OS=HomosapiensGN=ITGA6PE=1SV=1	2	1	0	126.6	86.298	2	1.3	0
sp|Q15555|MARE2_HUMANMicrotubule-associatedproteinRP/EBfamilymember2OS=HomosapiensGN=MAPRE2PE=1SV=1;tr|M0QX52|M0QX52_HUMANMicrotubule-associatedproteinRP/EBfamilymember2(Fragment)OS=HomosapiensGN=MAPRE2PE=1SV=1;tr|K7EL66|K7EL66_HUMANMicrotubule-associatedproteinRP/EBfamilymember2(Fragment)OS=HomosapiensGN=MAPRE2PE=1SV=1;tr|K7ERD8|K7ERD8_HUMANMicrotubule-associatedproteinRP/EBfamilymember2(Fragmen…	2	1	1	37.031	85.99	6.7	4.6	2.1
sp|P13639|EF2_HUMANElongationfactor2OS=HomosapiensGN=EEF2PE=1SV=4	2	0	2	95.337	59.186	2.7	0	2.6
sp|P07195|LDHB_HUMANL-lactatedehydrogenaseBchainOS=HomosapiensGN=LDHBPE=1SV=2;tr|A8MW50|A8MW50_HUMANL-lactatedehydrogenase(Fragment)OS=HomosapiensGN=LDHBPE=1SV=1;tr|F5H793|F5H793_HUMANL-lactatedehydrogenaseBchain(Fragment)OS=HomosapiensGN=LDHBPE=1SV=1;tr|C9J7H8|C9J7H8_HUMANL-lactatedehydrogenaseBchain(Fragment)OS=HomosapiensGN=LDHBPE=1SV=8	2	1	1	36.638	41.483	6.3	2.7	2.7
tr|Q8MH48|Q8MH48_HUMANHLAclassIhistocompatibilityantigen,alphachainGOS=HomosapiensGN=HLA-GPE=1SV=1;sp|P17693|HLAG_HUMANHLAclassIhistocompatibilityantigen,alphachainGOS=HomosapiensGN=HLA-GPE=1SV=1;tr|Q5RJ85|Q5RJ85_HUMANHLAclassIhistocompatibilityantigen,alphachainGOS=HomosapiensGN=HLA-GPE=1SV=1;tr|A0A0G2JPQ3|A0A0G2JPQ3_HUMANHLAclassIhistocompatibilityantigen,alphachainGOS=HomosapiensGN=HLA-GPE=1SV…	2	0	0	38.254	23.037	6.8	0	0
sp|P48059|LIMS1_HUMANLIMandsenescentcellantigen-like-containingdomainprotein1OS=HomosapiensGN=LIMS1PE=1SV=4;tr|A0A0J9YXC7|A0A0J9YXC7_HUMANLIMandsenescentcellantigen-like-containingdomainproteinOS=HomosapiensGN=LIMS4PE=1SV=1;tr|A0A0M3HER1|A0A0M3HER1_HUMANLIMandsenescentcellantigen-like-containingdomainprotein1(Fragment)OS=HomosapiensGN=LIMS1PE=1SV=1;sp|Q7Z4I7|LIMS2_HUMANLIMandsenescentcellantigen-…	2	2	1	37.251	50.912	6.8	4.9	4.6
sp|Q9NZN3|EHD3_HUMANEHdomain-containingprotein3OS=HomosapiensGN=EHD3PE=1SV=2	2	1	0	60.886	79.788	4.1	2.2	0
tr|B1AHL2|B1AHL2_HUMANFibulin-1OS=HomosapiensGN=FBLN1PE=1SV=1	2	4	5	78.329	9.3993	3.1	8.6	7.4
sp|P00742|FA10_HUMANCoagulationfactorXOS=HomosapiensGN=F10PE=1SV=2	2	1	1	54.731	14.836	3.7	1.8	1.8
sp|P01344|IGF2_HUMANInsulin-likegrowthfactorIIOS=HomosapiensGN=IGF2PE=1SV=1	2	2	2	20.14	29.058	13.9	6.1	6.1
sp|P02749|APOH_HUMANBeta-2-glycoprotein1OS=HomosapiensGN=APOHPE=1SV=3	2	3	3	38.298	14.494	3.5	5.5	5.5
tr|F5GY03|F5GY03_HUMANSPARC(Fragment)OS=HomosapiensGN=SPARCPE=1SV=1;sp|P09486|SPRC_HUMANSPARCOS=HomosapiensGN=SPARCPE=1SV=1;tr|E5RK62|E5RK62_HUMANSPARC(Fragment)OS=HomosapiensGN=SPARCPE=1SV=1	2	3	0	17.47	25.927	15.4	26.2	0
sp|P63104|1433Z_HUMAN14-3-3proteinzeta/deltaOS=HomosapiensGN=YWHAZPE=1SV=1;tr|E7EX29|E7EX29_HUMAN14-3-3proteinzeta/delta(Fragment)OS=HomosapiensGN=YWHAZPE=1SV=1;tr|E7ESK7|E7ESK7_HUMAN14-3-3proteinzeta/delta(Fragment)OS=HomosapiensGN=YWHAZPE=1SV=1;tr|B0AZS6|B0AZS6_HUMAN14-3-3proteinzeta/deltaOS=HomosapiensGN=YWHAZPE=1SV=1;tr|E5RGE1|E5RGE1_HUMAN14-3-3proteinzeta/delta(Fragment)OS=HomosapiensGN=YWHA…	2	0	1	27.745	74.874	8.6	0	4.5
sp|Q9P2B2|FPRP_HUMANProstaglandinF2receptornegativeregulatorOS=HomosapiensGN=PTGFRNPE=1SV=2	2	1	0	98.555	72.1	2.4	1.1	0
sp|P36871|PGM1_HUMANPhosphoglucomutase-1OS=HomosapiensGN=PGM1PE=1SV=3	2	0	1	61.448	23.449	3.7	0	2
sp|P50552|VASP_HUMANVasodilator-stimulatedphosphoproteinOS=HomosapiensGN=VASPPE=1SV=3;tr|K7ENR7|K7ENR7_HUMANVasodilator-stimulatedphosphoprotein(Fragment)OS=HomosapiensGN=VASPPE=1SV=1;tr|K7ENL7|K7ENL7_HUMANVasodilator-stimulatedphosphoproteinOS=HomosapiensGN=VASPPE=1SV=1	2	0	1	39.829	33.677	7.1	0	3.4
sp|Q14118|DAG1_HUMANDystroglycanOS=HomosapiensGN=DAG1PE=1SV=2	2	1	1	97.44	14.008	2.6	1.7	0.9
sp|P11216|PYGB_HUMANGlycogenphosphorylase,brainformOS=HomosapiensGN=PYGBPE=1SV=5	2	0	0	96.695	6.8467	2.6	0	0
tr|F8VZY9|F8VZY9_HUMANKeratin,typeIcytoskeletal18OS=HomosapiensGN=KRT18PE=1SV=1;sp|P05783|K1C18_HUMANKeratin,typeIcytoskeletal18OS=HomosapiensGN=KRT18PE=1SV=2;CON__H-INV:HIT000015463;tr|C4AM86|C4AM86_HUMANKeratin,typeIcuticularHa5OS=HomosapiensGN=KRT35PE=1SV=1;CON__Q92764;sp|Q92764|KRT35_HUMANKeratin,typeIcuticularHa5OS=HomosapiensGN=KRT35PE=1SV=5;CON__Q497I4	1	2	3	43.774	105.19	2.3	4.1	6.1
sp|O00592|PODXL_HUMANPodocalyxinOS=HomosapiensGN=PODXLPE=1SV=2	1	1	3	58.635	136.46	2.3	2.9	5.2
tr|H0YEN5|H0YEN5_HUMAN40SribosomalproteinS2(Fragment)OS=HomosapiensGN=RPS2PE=1SV=1;sp|P15880|RS2_HUMAN40SribosomalproteinS2OS=HomosapiensGN=RPS2PE=1SV=2;tr|E9PMM9|E9PMM9_HUMAN40SribosomalproteinS2(Fragment)OS=HomosapiensGN=RPS2PE=1SV=1;tr|E9PQD7|E9PQD7_HUMAN40SribosomalproteinS2OS=HomosapiensGN=RPS2PE=1SV=1;tr|I3L404|I3L404_HUMAN40SribosomalproteinS2(Fragment)OS=HomosapiensGN=RPS2PE=1SV=1;tr|E9PM…	1	1	3	21.154	51.731	5.6	3.6	14.9
sp|P02787|TRFE_HUMANSerotransferrinOS=HomosapiensGN=TFPE=1SV=3;tr|H7C5E8|H7C5E8_HUMANSerotransferrin(Fragment)OS=HomosapiensGN=TFPE=1SV=1	1	4	3	77.063	6.5558	1.7	4.6	3.3
tr|Q5TEC6|Q5TEC6_HUMANHistoneH3OS=HomosapiensGN=HIST2H3PS2PE=1SV=1	1	1	1	15.43	6.3107	5.1	5.1	5.1
tr|A6NNI4|A6NNI4_HUMANTetraspaninOS=HomosapiensGN=CD9PE=1SV=1;tr|G8JLH6|G8JLH6_HUMANTetraspanin(Fragment)OS=HomosapiensGN=CD9PE=1SV=1;sp|P21926|CD9_HUMANCD9antigenOS=HomosapiensGN=CD9PE=1SV=4;tr|A0A087WU13|A0A087WU13_HUMANTetraspaninOS=HomosapiensGN=CD9PE=1SV=1	1	2	0	17.764	80.414	6.3	13.2	0
tr|K7EK07|K7EK07_HUMANHistoneH3(Fragment)OS=HomosapiensGN=H3F3BPE=1SV=1;sp|Q71DI3|H32_HUMANHistoneH3.2OS=HomosapiensGN=HIST2H3APE=1SV=3;sp|Q16695|H31T_HUMANHistoneH3.1tOS=HomosapiensGN=HIST3H3PE=1SV=3;sp|P84243|H33_HUMANHistoneH3.3OS=HomosapiensGN=H3F3APE=1SV=2;sp|P68431|H31_HUMANHistoneH3.1OS=HomosapiensGN=HIST1H3APE=1SV=2;sp|Q6NXT2|H3C_HUMANHistoneH3.3COS=HomosapiensGN=H3F3CPE=1SV=3;tr|K7EMV3|K…	1	1	2	14.914	33.623	5.3	5.3	10.6
sp|P43121|MUC18_HUMANCellsurfaceglycoproteinMUC18OS=HomosapiensGN=MCAMPE=1SV=2	1	0	1	71.607	37.049	1.9	0	1.4
sp|P61769|B2MG_HUMANBeta-2-microglobulinOS=HomosapiensGN=B2MPE=1SV=1;tr|H0YLF3|H0YLF3_HUMANBeta-2-microglobulin(Fragment)OS=HomosapiensGN=B2MPE=1SV=1;tr|F5H6I0|F5H6I0_HUMANBeta-2-microglobulinOS=HomosapiensGN=B2MPE=1SV=2	1	3	2	13.714	66.736	18.5	26.1	15.1
tr|H0YD13|H0YD13_HUMANCD44antigenOS=HomosapiensGN=CD44PE=1SV=2;sp|P16070|CD44_HUMANCD44antigenOS=HomosapiensGN=CD44PE=1SV=3;tr|H0YDW7|H0YDW7_HUMANCD44antigen(Fragment)OS=HomosapiensGN=CD44PE=1SV=1;tr|H0YCV9|H0YCV9_HUMANCD44antigen(Fragment)OS=HomosapiensGN=CD44PE=1SV=1;tr|H0Y2P0|H0Y2P0_HUMANCD44antigen(Fragment)OS=HomosapiensGN=CD44PE=1SV=1;tr|H0Y5E4|H0Y5E4_HUMANCD44antigen(Fragment)OS=Homosapien…	1	1	2	22.683	36.959	5.8	5.8	10.2
tr|A0A0A0MSI0|A0A0A0MSI0_HUMANPeroxiredoxin-1(Fragment)OS=HomosapiensGN=PRDX1PE=1SV=1;sp|Q06830|PRDX1_HUMANPeroxiredoxin-1OS=HomosapiensGN=PRDX1PE=1SV=1;tr|A0A0A0MRQ5|A0A0A0MRQ5_HUMANPeroxiredoxin-1OS=HomosapiensGN=PRDX1PE=1SV=1;tr|H7C3T4|H7C3T4_HUMANPeroxiredoxin-4(Fragment)OS=HomosapiensGN=PRDX4PE=1SV=1;sp|Q13162|PRDX4_HUMANPeroxiredoxin-4OS=HomosapiensGN=PRDX4PE=1SV=1	1	1	1	18.976	43.361	5.8	7	5.3
sp|P50991|TCPD_HUMANT-complexprotein1subunitdeltaOS=HomosapiensGN=CCT4PE=1SV=4	1	1	0	57.924	70.264	1.5	1.3	0
sp|P60842|IF4A1_HUMANEukaryoticinitiationfactor4A-IOS=HomosapiensGN=EIF4A1PE=1SV=1;tr|E7EQG2|E7EQG2_HUMANEukaryoticinitiationfactor4A-IIOS=HomosapiensGN=EIF4A2PE=1SV=1;sp|Q14240|IF4A2_HUMANEukaryoticinitiationfactor4A-IIOS=HomosapiensGN=EIF4A2PE=1SV=2;tr|J3QLN6|J3QLN6_HUMANEukaryoticinitiationfactor4A-I(Fragment)OS=HomosapiensGN=EIF4A1PE=1SV=1;tr|J3QR64|J3QR64_HUMANEukaryoticinitiationfactor4A-I(…	1	1	1	46.153	30.935	3.9	3.4	2.5
sp|P67936|TPM4_HUMANTropomyosinalpha-4chainOS=HomosapiensGN=TPM4PE=1SV=3;tr|K7ERG3|K7ERG3_HUMANTropomyosinalpha-4chain(Fragment)OS=HomosapiensGN=TPM4PE=1SV=1;tr|K7ENT6|K7ENT6_HUMANTropomyosinalpha-4chain(Fragment)OS=HomosapiensGN=TPM4PE=1SV=1;tr|Q5TCU3|Q5TCU3_HUMANTropomyosinbetachainOS=HomosapiensGN=TPM2PE=1SV=1;sp|P07951|TPM2_HUMANTropomyosinbetachainOS=HomosapiensGN=TPM2PE=1SV=1;CON__Q3SX28;sp…	1	1	2	28.521	56.161	4.4	6	8.5
sp|P23528|COF1_HUMANCofilin-1OS=HomosapiensGN=CFL1PE=1SV=3;tr|G3V1A4|G3V1A4_HUMANCofilin1(Non-muscle),isoformCRA_aOS=HomosapiensGN=CFL1PE=1SV=1;tr|E9PP50|E9PP50_HUMANCofilin-1(Fragment)OS=HomosapiensGN=CFL1PE=1SV=8;tr|E9PK25|E9PK25_HUMANCofilin-1OS=HomosapiensGN=CFL1PE=1SV=1;tr|E9PQB7|E9PQB7_HUMANCofilin-1(Fragment)OS=HomosapiensGN=CFL1PE=1SV=1;tr|E9PLJ3|E9PLJ3_HUMANCofilin-1(Fragment)OS=Homosapi…	1	1	0	18.502	72.411	7.2	8.4	0
sp|Q13200|PSMD2_HUMAN26Sproteasomenon-ATPaseregulatorysubunit2OS=HomosapiensGN=PSMD2PE=1SV=3;tr|H7C2Q3|H7C2Q3_HUMAN26Sproteasomenon-ATPaseregulatorysubunit2(Fragment)OS=HomosapiensGN=PSMD2PE=1SV=1;tr|C9JPC0|C9JPC0_HUMAN26Sproteasomenon-ATPaseregulatorysubunit2(Fragment)OS=HomosapiensGN=PSMD2PE=1SV=1	1	1	0	100.2	49.859	1.9	1.7	0
tr|Q5SRP5|Q5SRP5_HUMANApolipoproteinMOS=HomosapiensGN=APOMPE=1SV=1;sp|O95445|APOM_HUMANApolipoproteinMOS=HomosapiensGN=APOMPE=1SV=2	1	2	0	14.185	11.658	5.4	11.6	0
sp|P26038|MOES_HUMANMoesinOS=HomosapiensGN=MSNPE=1SV=3;sp|P35241|RADI_HUMANRadixinOS=HomosapiensGN=RDXPE=1SV=1;tr|E7EQR4|E7EQR4_HUMANEzrinOS=HomosapiensGN=EZRPE=1SV=3;sp|P15311|EZRI_HUMANEzrinOS=HomosapiensGN=EZRPE=1SV=4;tr|V9GZ54|V9GZ54_HUMANMoesin(Fragment)OS=HomosapiensGN=MSNPE=1SV=1;tr|E9PQ82|E9PQ82_HUMANRadixin(Fragment)OS=HomosapiensGN=RDXPE=1SV=1;tr|E9PNV3|E9PNV3_HUMANRadixin(Fragment)OS=H…	1	1	0	67.819	11.547	1.6	1.6	0
sp|P60174|TPIS_HUMANTriosephosphateisomeraseOS=HomosapiensGN=TPI1PE=1SV=3;tr|U3KQF3|U3KQF3_HUMANTriosephosphateisomerase(Fragment)OS=HomosapiensGN=TPI1PE=1SV=1;tr|U3KPZ0|U3KPZ0_HUMANTriosephosphateisomerase(Fragment)OS=HomosapiensGN=TPI1PE=1SV=1	1	1	0	30.791	14.446	5.2	5.2	0
sp|Q9UGM3|DMBT1_HUMANDeletedinmalignantbraintumors1proteinOS=HomosapiensGN=DMBT1PE=1SV=2	1	2	1	260.73	29.863	5.2	8.5	3.3
sp|P52907|CAZA1_HUMANF-actin-cappingproteinsubunitalpha-1OS=HomosapiensGN=CAPZA1PE=1SV=3;sp|P47755|CAZA2_HUMANF-actin-cappingproteinsubunitalpha-2OS=HomosapiensGN=CAPZA2PE=1SV=3;tr|C9JUG7|C9JUG7_HUMANF-actin-cappingproteinsubunitalpha-2OS=HomosapiensGN=CAPZA2PE=1SV=1;tr|F8W9N7|F8W9N7_HUMANF-actin-cappingproteinsubunitalpha-2OS=HomosapiensGN=CAPZA2PE=1SV=1;tr|A0A0D9SET8|A0A0D9SET8_HUMANF-actin-cap…	1	1	0	32.922	20.741	6.3	6.3	0
tr|M0QZH0|M0QZH0_HUMANReticulocalbin-3(Fragment)OS=HomosapiensGN=RCN3PE=1SV=1;sp|Q96D15|RCN3_HUMANReticulocalbin-3OS=HomosapiensGN=RCN3PE=1SV=1;tr|M0QYB8|M0QYB8_HUMANReticulocalbin-3(Fragment)OS=HomosapiensGN=RCN3PE=1SV=1	1	2	0	19.813	21.021	8.3	15.4	0
tr|C9JEU5|C9JEU5_HUMANFibrinogengammachainOS=HomosapiensGN=FGGPE=1SV=1;sp|P02679|FIBG_HUMANFibrinogengammachainOS=HomosapiensGN=FGGPE=1SV=3;tr|C9JC84|C9JC84_HUMANFibrinogengammachainOS=HomosapiensGN=FGGPE=1SV=1	1	2	0	50.322	82.577	2	6.1	0
tr|E7EQV9|E7EQV9_HUMANRibosomalproteinL15(Fragment)OS=HomosapiensGN=RPL15PE=1SV=1;sp|P61313|RL15_HUMAN60SribosomalproteinL15OS=HomosapiensGN=RPL15PE=1SV=2;tr|E7EX53|E7EX53_HUMANRibosomalproteinL15(Fragment)OS=HomosapiensGN=RPL15PE=1SV=1;tr|E7ENU7|E7ENU7_HUMANRibosomalproteinL15(Fragment)OS=HomosapiensGN=RPL15PE=1SV=1;tr|E7ERA2|E7ERA2_HUMANRibosomalproteinL15OS=HomosapiensGN=RPL15PE=1SV=1	1	0	1	20.51	17.707	4	0	5.2
sp|P08514|ITA2B_HUMANIntegrinalpha-IIbOS=HomosapiensGN=ITGA2BPE=1SV=3	1	1	0	113.38	22.192	1.1	0.7	0
tr|E7ENL6|E7ENL6_HUMANCollagenalpha-3(VI)chainOS=HomosapiensGN=COL6A3PE=1SV=2;sp|P12111|CO6A3_HUMANCollagenalpha-3(VI)chainOS=HomosapiensGN=COL6A3PE=1SV=5	1	1	0	278.11	35.31	0.4	0.4	0
sp|Q8NG11|TSN14_HUMANTetraspanin-14OS=HomosapiensGN=TSPAN14PE=1SV=1;tr|H7BXY6|H7BXY6_HUMANTetraspaninOS=HomosapiensGN=TSPAN14PE=1SV=1;tr|A6NEP9|A6NEP9_HUMANTetraspanin(Fragment)OS=HomosapiensGN=TSPAN14PE=1SV=2	1	1	0	30.69	18.594	3	3	0
sp|P39023|RL3_HUMAN60SribosomalproteinL3OS=HomosapiensGN=RPL3PE=1SV=2;tr|H7C422|H7C422_HUMAN60SribosomalproteinL3(Fragment)OS=HomosapiensGN=RPL3PE=1SV=1;tr|H7C3M2|H7C3M2_HUMAN60SribosomalproteinL3(Fragment)OS=HomosapiensGN=RPL3PE=1SV=1;tr|G5E9G0|G5E9G0_HUMAN60SribosomalproteinL3OS=HomosapiensGN=RPL3PE=1SV=1;tr|F8WCR1|F8WCR1_HUMAN60SribosomalproteinL3OS=HomosapiensGN=RPL3PE=1SV=1;tr|B5MCW2|B5MCW2_…	1	0	2	46.108	38.897	5.5	0	4.7
tr|A0A0C4DGL8|A0A0C4DGL8_HUMANHaptoglobinOS=HomosapiensGN=HPPE=1SV=1;tr|J3QR68|J3QR68_HUMANHaptoglobin(Fragment)OS=HomosapiensGN=HPPE=1SV=1;sp|P00738|HPT_HUMANHaptoglobinOS=HomosapiensGN=HPPE=1SV=1;tr|H0Y300|H0Y300_HUMANHaptoglobinOS=HomosapiensGN=HPPE=1SV=4;tr|J3KTC3|J3KTC3_HUMANHaptoglobin-relatedproteinOS=HomosapiensGN=HPRPE=1SV=1;tr|H3BS21|H3BS21_HUMANHaptoglobin(Fragment)OS=HomosapiensGN=HPP…	1	0	1	38.451	15.82	2.6	0	3.5
sp|Q12860|CNTN1_HUMANContactin-1OS=HomosapiensGN=CNTN1PE=1SV=1	1	1	0	113.32	19.177	1	1	0
sp|O43854|EDIL3_HUMANEGF-likerepeatanddiscoidinI-likedomain-containingprotein3OS=HomosapiensGN=EDIL3PE=1SV=1	1	1	1	53.764	10.63	1.9	1.9	1.9
tr|A0A087X1L8|A0A087X1L8_HUMANUncharacterizedproteinOS=HomosapiensGN=LOC102723996PE=4SV=1;sp|O75144|ICOSL_HUMANICOSligandOS=HomosapiensGN=ICOSLGPE=1SV=2;tr|K4DIA0|K4DIA0_HUMANICOSligandOS=HomosapiensGN=ICOSLGPE=1SV=1	1	0	1	20.996	12.176	5.2	0	5.2
tr|E9PRD9|E9PRD9_HUMANVascularnon-inflammatorymolecule2(Fragment)OS=HomosapiensGN=VNN2PE=1SV=1;tr|E9PQ75|E9PQ75_HUMANVascularnon-inflammatorymolecule2OS=HomosapiensGN=VNN2PE=1SV=1;tr|E9PL76|E9PL76_HUMANVascularnon-inflammatorymolecule2(Fragment)OS=HomosapiensGN=VNN2PE=1SV=1;tr|B4DQB2|B4DQB2_HUMANVascularnon-inflammatorymolecule2OS=HomosapiensGN=VNN2PE=1SV=1;tr|J3KQQ7|J3KQQ7_HUMANVascularnon-infla…	1	1	0	11.498	9.1197	13.7	13.7	0
sp|P01042|KNG1_HUMANKininogen-1OS=HomosapiensGN=KNG1PE=1SV=2	1	1	3	71.957	18.609	1.4	1.4	6.4
sp|P05386|RLA1_HUMAN60SacidicribosomalproteinP1OS=HomosapiensGN=RPLP1PE=1SV=1	1	0	1	11.514	7.2883	14	0	14
tr|I3L191|I3L191_HUMANCarboxylesterase4A(Fragment)OS=HomosapiensGN=CES4APE=4SV=2;tr|A0A0C4DGH1|A0A0C4DGH1_HUMANCarboxylicesterhydrolase(Fragment)OS=HomosapiensGN=CES4APE=3SV=1;sp|Q5XG92|EST4A_HUMANCarboxylesterase4AOS=HomosapiensGN=CES4APE=2SV=2	1	1	1	19.698	6.2185	7.3	7.3	7.3
tr|H7C2G2|H7C2G2_HUMANNAD(P)(+)--arginineADP-ribosyltransferase(Fragment)OS=HomosapiensGN=ART4PE=1SV=1;sp|Q93070|NAR4_HUMANEcto-ADP-ribosyltransferase4OS=HomosapiensGN=ART4PE=2SV=2	1	1	0	31.511	-2	2.6	2.6	0
tr|E9PQI5|E9PQI5_HUMANChargedmultivesicularbodyprotein4aOS=HomosapiensGN=CHMP4APE=1SV=1;tr|E9PQ80|E9PQ80_HUMANChargedmultivesicularbodyprotein4a(Fragment)OS=HomosapiensGN=CHMP4APE=1SV=1;sp|Q9BY43|CHM4A_HUMANChargedmultivesicularbodyprotein4aOS=HomosapiensGN=CHMP4APE=1SV=3;tr|E9PSI1|E9PSI1_HUMANTransmembrane9superfamilymemberOS=HomosapiensPE=3SV=1	1	0	1	18.845	6.1568	4.2	0	4.2
sp|Q9ULI3|HEG1_HUMANProteinHEGhomolog1OS=HomosapiensGN=HEG1PE=1SV=3;tr|H7C4M4|H7C4M4_HUMANProteinHEGhomolog1(Fragment)OS=HomosapiensGN=HEG1PE=1SV=1	1	1	0	147.46	11.534	0.7	0.6	0
sp|P11717|MPRI_HUMANCation-independentmannose-6-phosphatereceptorOS=HomosapiensGN=IGF2RPE=1SV=3	1	1	0	274.37	12.05	0.4	0.4	0
tr|C9JD32|C9JD32_HUMAN60SribosomalproteinL23(Fragment)OS=HomosapiensGN=RPL23PE=1SV=1;tr|J3KT29|J3KT29_HUMAN60SribosomalproteinL23OS=HomosapiensGN=RPL23PE=1SV=1;sp|P62829|RL23_HUMAN60SribosomalproteinL23OS=HomosapiensGN=RPL23PE=1SV=1;tr|J3QQT9|J3QQT9_HUMAN60SribosomalproteinL23(Fragment)OS=HomosapiensGN=RPL23PE=1SV=1;tr|J3KTJ3|J3KTJ3_HUMAN60SribosomalproteinL23OS=HomosapiensGN=RPL23PE=1SV=1;tr|B9Z…	1	1	0	9.6694	13.716	22	11	0
tr|C9J9K3|C9J9K3_HUMAN40SribosomalproteinSA(Fragment)OS=HomosapiensGN=RPSAPE=1SV=8;sp|P08865|RSSA_HUMAN40SribosomalproteinSAOS=HomosapiensGN=RPSAPE=1SV=4;tr|A0A0C4DG17|A0A0C4DG17_HUMAN40SribosomalproteinSAOS=HomosapiensGN=RPSAPE=1SV=1	1	1	0	29.404	36.341	5.7	6.8	0
sp|P62879|GBB2_HUMANGuaninenucleotide-bindingproteinG(I)/G(S)/G(T)subunitbeta-2OS=HomosapiensGN=GNB2PE=1SV=3;tr|E7EP32|E7EP32_HUMANGuaninenucleotide-bindingproteinG(I)/G(S)/G(T)subunitbeta-2OS=HomosapiensGN=GNB2PE=1SV=1;sp|Q9HAV0|GBB4_HUMANGuaninenucleotide-bindingproteinsubunitbeta-4OS=HomosapiensGN=GNB4PE=1SV=3;tr|C9JD14|C9JD14_HUMANGuaninenucleotide-bindingproteinsubunitbeta-4(Fragment)OS=Homo…	1	1	0	37.331	21.079	4.1	2.9	0
sp|P04075|ALDOA_HUMANFructose-bisphosphatealdolaseAOS=HomosapiensGN=ALDOAPE=1SV=2;tr|J3KPS3|J3KPS3_HUMANFructose-bisphosphatealdolaseOS=HomosapiensGN=ALDOAPE=1SV=1;tr|H3BQN4|H3BQN4_HUMANFructose-bisphosphatealdolaseOS=HomosapiensGN=ALDOAPE=1SV=1;tr|H3BR68|H3BR68_HUMANFructose-bisphosphatealdolaseA(Fragment)OS=HomosapiensGN=ALDOAPE=1SV=1;tr|H3BMQ8|H3BMQ8_HUMANFructose-bisphosphatealdolaseA(Fragmen…	1	1	0	39.42	38.02	3	3	0
sp|P48643|TCPE_HUMANT-complexprotein1subunitepsilonOS=HomosapiensGN=CCT5PE=1SV=1;tr|E7ENZ3|E7ENZ3_HUMANT-complexprotein1subunitepsilonOS=HomosapiensGN=CCT5PE=1SV=1;tr|B7ZAR1|B7ZAR1_HUMANT-complexprotein1subunitepsilonOS=HomosapiensGN=CCT5PE=1SV=1;tr|E9PCA1|E9PCA1_HUMANT-complexprotein1subunitepsilonOS=HomosapiensGN=CCT5PE=1SV=1;tr|D6RIZ7|D6RIZ7_HUMANT-complexprotein1subunitepsilonOS=HomosapiensGN…	1	0	1	59.67	40.983	2.6	0	2.6
sp|P62873|GBB1_HUMANGuaninenucleotide-bindingproteinG(I)/G(S)/G(T)subunitbeta-1OS=HomosapiensGN=GNB1PE=1SV=3;tr|B3KVK2|B3KVK2_HUMANGuaninenucleotide-bindingproteinG(I)/G(S)/G(T)subunitbeta-1OS=HomosapiensGN=GNB1PE=1SV=1;tr|B1AKQ8|B1AKQ8_HUMANGuaninenucleotide-bindingproteinG(I)/G(S)/G(T)subunitbeta-1(Fragment)OS=HomosapiensGN=GNB1PE=1SV=8;tr|F6X3N5|F6X3N5_HUMANGuaninenucleotide-bindingproteinG(I)…	1	1	0	37.377	53.956	4.1	2.9	0
sp|P53396|ACLY_HUMANATP-citratesynthaseOS=HomosapiensGN=ACLYPE=1SV=3;tr|K7ESG8|K7ESG8_HUMANATP-citratesynthase(Fragment)OS=HomosapiensGN=ACLYPE=1SV=1	1	1	0	120.84	44.433	1.3	0.7	0
sp|P24593|IBP5_HUMANInsulin-likegrowthfactor-bindingprotein5OS=HomosapiensGN=IGFBP5PE=1SV=1	1	0	1	30.57	6.5236	5.1	0	5.1
tr|E7EV88|E7EV88_HUMANAdisintegrinandmetalloproteinasewiththrombospondinmotifs13OS=HomosapiensGN=ADAMTS13PE=1SV=2;sp|Q76LX8|ATS13_HUMANAdisintegrinandmetalloproteinasewiththrombospondinmotifs13OS=HomosapiensGN=ADAMTS13PE=1SV=1	1	1	0	48.317	6.425	2.5	2.5	0
sp|P02671|FIBA_HUMANFibrinogenalphachainOS=HomosapiensGN=FGAPE=1SV=2	1	1	1	94.972	6.3392	1	1	1
tr|H0Y896|H0Y896_HUMANCilia-andflagella-associatedprotein44(Fragment)OS=HomosapiensGN=CFAP44PE=1SV=1	1	1	1	49.55	6.3514	2.9	2.9	2.9
tr|C9JMX4|C9JMX4_HUMANInsulin-likegrowthfactor-bindingprotein3(Fragment)OS=HomosapiensGN=IGFBP3PE=1SV=1;tr|H0Y485|H0Y485_HUMANInsulin-likegrowthfactor-bindingprotein3(Fragment)OS=HomosapiensGN=IGFBP3PE=1SV=1;tr|H0Y5K2|H0Y5K2_HUMANInsulin-likegrowthfactor-bindingprotein3(Fragment)OS=HomosapiensGN=IGFBP3PE=1SV=1;tr|B3KWK7|B3KWK7_HUMANInsulin-likegrowthfactorbindingprotein3,isoformCRA_bOS=Homosapien…	1	1	0	14.9	6.5437	7.6	7.6	0
tr|E9PGB3|E9PGB3_HUMANTransformingacidiccoiled-coil-containingprotein2(Fragment)OS=HomosapiensGN=TACC2PE=1SV=1	1	1	0	72.092	-2	3.4	3.4	0
tr|Q9BS19|Q9BS19_HUMANHPXproteinOS=HomosapiensGN=HPXPE=1SV=1;sp|P02790|HEMO_HUMANHemopexinOS=HomosapiensGN=HPXPE=1SV=2	1	1	1	28.63	11.699	5.1	5.1	3.9
tr|K7EM90|K7EM90_HUMANAlpha-enolase(Fragment)OS=HomosapiensGN=ENO1PE=1SV=1;sp|P06733|ENOA_HUMANAlpha-enolaseOS=HomosapiensGN=ENO1PE=1SV=2;tr|K7ERS8|K7ERS8_HUMANAlpha-enolase(Fragment)OS=HomosapiensGN=ENO1PE=1SV=8;tr|F5H1C3|F5H1C3_HUMANGamma-enolase(Fragment)OS=HomosapiensGN=ENO2PE=1SV=1;tr|E5RI09|E5RI09_HUMANBeta-enolase(Fragment)OS=HomosapiensGN=ENO3PE=1SV=1;tr|E5RG95|E5RG95_HUMANBeta-enolase(Fr…	1	0	1	21.02	18.438	9.2	0	4.1
sp|O00187|MASP2_HUMANMannan-bindinglectinserineprotease2OS=HomosapiensGN=MASP2PE=1SV=4	1	1	0	75.702	15.286	2.2	1.2	0
sp|P09758|TACD2_HUMANTumor-associatedcalciumsignaltransducer2OS=HomosapiensGN=TACSTD2PE=1SV=3	0	2	3	35.709	111.14	0	6.5	10.8
tr|X1WI28|X1WI28_HUMAN60SribosomalproteinL10(Fragment)OS=HomosapiensGN=RPL10PE=1SV=7;sp|P27635|RL10_HUMAN60SribosomalproteinL10OS=HomosapiensGN=RPL10PE=1SV=4;tr|F8W7C6|F8W7C6_HUMAN60SribosomalproteinL10OS=HomosapiensGN=RPL10PE=1SV=2;tr|A0A087WV22|A0A087WV22_HUMAN60SribosomalproteinL10OS=HomosapiensGN=RPL10PE=1SV=1;tr|B8A6G2|B8A6G2_HUMAN60SribosomalproteinL10(Fragment)OS=HomosapiensGN=RPL10PE=1SV=…	0	2	6	22.975	91.92	0	5	35
tr|Q5T6W2|Q5T6W2_HUMANHeterogeneousnuclearribonucleoproteinK(Fragment)OS=HomosapiensGN=HNRNPKPE=1SV=1;sp|P61978|HNRPK_HUMANHeterogeneousnuclearribonucleoproteinKOS=HomosapiensGN=HNRNPKPE=1SV=1;tr|S4R359|S4R359_HUMANHeterogeneousnuclearribonucleoproteinK(Fragment)OS=HomosapiensGN=HNRNPKPE=1SV=1	0	0	1	41.807	71.4	0	0	3.7
sp|P00533|EGFR_HUMANEpidermalgrowthfactorreceptorOS=HomosapiensGN=EGFRPE=1SV=2;tr|A0A1W2PRR9|A0A1W2PRR9_HUMANEpidermalgrowthfactorreceptorOS=HomosapiensGN=EGFRPE=1SV=1;tr|Q504U8|Q504U8_HUMANReceptorprotein-tyrosinekinaseOS=HomosapiensGN=EGFRPE=1SV=1;tr|E9PFD7|E9PFD7_HUMANReceptorprotein-tyrosinekinaseOS=HomosapiensGN=EGFRPE=1SV=3;tr|C9JYS6|C9JYS6_HUMANEpidermalgrowthfactorreceptor(Fragment)OS=Hom…	0	2	1	134.28	34.536	0	1.8	0.8
tr|F5GY80|F5GY80_HUMANComplementcomponentC8betachainOS=HomosapiensGN=C8BPE=1SV=1;tr|F5H7G1|F5H7G1_HUMANComplementcomponentC8betachainOS=HomosapiensGN=C8BPE=1SV=1;sp|P07358|CO8B_HUMANComplementcomponentC8betachainOS=HomosapiensGN=C8BPE=1SV=3	0	1	1	60.04	9.5847	0	2.1	2.1
sp|P40227|TCPZ_HUMANT-complexprotein1subunitzetaOS=HomosapiensGN=CCT6APE=1SV=3	0	1	1	58.024	23.815	0	2.3	2.6
tr|A0A087WWU8|A0A087WWU8_HUMANTropomyosinalpha-3chainOS=HomosapiensGN=TPM3PE=1SV=1;tr|Q5VU61|Q5VU61_HUMANTropomyosinalpha-3chainOS=HomosapiensGN=TPM3PE=1SV=2;tr|Q5HYB6|Q5HYB6_HUMANEpididymisluminalprotein189OS=HomosapiensGN=DKFZp686J1372PE=1SV=1;tr|J3KN67|J3KN67_HUMANTropomyosinalpha-3chainOS=HomosapiensGN=TPM3PE=1SV=1;tr|D6R904|D6R904_HUMANTropomyosinalpha-3chainOS=HomosapiensGN=TPM3PE=1SV=1;tr|…	0	2	3	26.42	12.32	0	11	14.1
	WT
