# Supplementary material
Source: HighWire-hosted journal article supplement (https://thorax.bmj.com/content/75/6/449)
Supplement: inline-supplementary-material-5 [file inline-supplementary-material-5.xlsx]

## Sheet: Allgroups
Protein IDs	Majority protein IDs	Peptide counts (all)	Peptide counts (razor+unique)	Peptide counts (unique)	Fasta headers	Number of proteins	Peptides	Razor + unique peptides	Unique peptides	Peptides 10Y1	Peptides 10Y2	Peptides 10Y3	Peptides 10Y4	Peptides 1Y1	Peptides 1Y2	Peptides 1Y3	Peptides 1Y4	Peptides 1Y5	Peptides 1Y6	Peptides 5Y1	Peptides 5Y2	Peptides 5Y3	Peptides 5Y4	Peptides 5Y5	Peptides ADULT1	Peptides ADULT2	Peptides ADULT3	Peptides ADULT4	Peptides ADULT5	Peptides ADULT7	Razor + unique peptides 10Y1	Razor + unique peptides 10Y2	Razor + unique peptides 10Y3	Razor + unique peptides 10Y4	Razor + unique peptides 1Y1	Razor + unique peptides 1Y2	Razor + unique peptides 1Y3	Razor + unique peptides 1Y4	Razor + unique peptides 1Y5	Razor + unique peptides 1Y6	Razor + unique peptides 5Y1	Razor + unique peptides 5Y2	Razor + unique peptides 5Y3	Razor + unique peptides 5Y4	Razor + unique peptides 5Y5	Razor + unique peptides ADULT1	Razor + unique peptides ADULT2	Razor + unique peptides ADULT3	Razor + unique peptides ADULT4
CON__ENSEMBL:ENSBTAP00000024146	CON__ENSEMBL:ENSBTAP00000024146	7	1	1		1	7	1	1	6	5	5	5	2	3	2	0	4	0	5	5	6	5	2	4	4	2	0	3	1	1	0	1	1	0	0	0	0	0	0	0	0	0	0	0	0	0	0	0
CON__ENSEMBL:ENSBTAP00000032840	CON__ENSEMBL:ENSBTAP00000032840	4	1	1		1	4	1	1	2	0	0	1	0	2	0	0	1	0	0	0	0	0	0	2	2	0	0	0	0	0	0	0	0	0	0	0	0	0	0	0	0	0	0	0	1	1	0	0
tr|A0A087X106|A0A087X106_HUMANKeratin,typeIIcuticularHb1OS=HomosapiensGN=KRT81PE=1SV=1;sp|O43790|KRT86_HUMANKeratin,typeIIcuticularHb6OS=HomosapiensGN=KRT86PE=1SV=1;CON__O43790;sp|P78385|KRT83_HUMANKeratin,typeIIcuticularHb3OS=HomosapiensGN=KRT83PE=1SV=2;CON__Q6NT21;CON__P78385;sp|Q14533|KRT81_HUMANKeratin,typeIIcuticularHb1OS=HomosapiensGN=KRT81PE=1SV=3;CON__Q14533;sp|A6NCN2|KR87P_HUMANPutativek…	tr|A0A087X106|A0A087X106_HUMANKeratin,typeIIcuticularHb1OS=HomosapiensGN=KRT81PE=1SV=1;sp|O43790|KRT86_HUMANKeratin,typeIIcuticularHb6OS=HomosapiensGN=KRT86PE=1SV=1;CON__O43790;sp|P78385|KRT83_HUMANKeratin,typeIIcuticularHb3OS=HomosapiensGN=KRT83PE=1SV=2;CON__Q6NT21;CON__P78385;sp|Q14533|KRT81_HUMANKeratin,typeIIcuticularHb1OS=HomosapiensGN=KRT81PE=1SV=3;CON__Q14533;sp|A6NCN2|KR87P_HUMANPutativek…	4;4;4;4;4;4;4;4;3;1;1	4;4;4;4;4;4;4;4;3;1;1	0;0;0;0;0;0;0;0;0;0;0	;;;;;;;;	11	4	4	0	1	4	1	1	0	0	1	0	0	0	0	0	0	0	0	1	0	0	0	0	0	1	4	1	1	0	0	1	0	0	0	0	0	0	0	0	1	0	0	0
sp|O76013|KRT36_HUMANKeratin,typeIcuticularHa6OS=HomosapiensGN=KRT36PE=1SV=1;CON__O76013;sp|O76015|KRT38_HUMANKeratin,typeIcuticularHa8OS=HomosapiensGN=KRT38PE=1SV=3;CON__O76015;tr|G3V1C2|G3V1C2_HUMANKeratin,typeIcytoskeletal40OS=HomosapiensGN=KRT40PE=1SV=1;CON__O76011;tr|C4AM86|C4AM86_HUMANKeratin,typeIcuticularHa5OS=HomosapiensGN=KRT35PE=1SV=1;CON__Q92764;sp|Q6A162|K1C40_HUMANKeratin,typeIcytos…	sp|O76013|KRT36_HUMANKeratin,typeIcuticularHa6OS=HomosapiensGN=KRT36PE=1SV=1;CON__O76013	7;7;2;2;1;1;1;1;1;1;1;1;1;1;1;1;1;1	6;6;1;1;1;1;0;0;1;1;1;1;1;1;0;0;0;0	4;4;0;0;0;0;0;0;0;0;0;0;0;0;0;0;0;0	;	18	7	6	4	0	4	1	1	0	0	0	0	0	0	1	0	1	1	1	2	1	1	1	1	2	0	4	0	0	0	0	0	0	0	0	1	0	1	1	0	1	1	0	0
CON__P00761	CON__P00761	9	9	9		1	9	9	9	6	3	5	5	6	8	9	4	6	8	3	4	5	5	2	4	3	5	3	5	1	6	3	5	5	6	8	9	4	6	8	3	4	5	5	2	4	3	5	3
CON__P01966	CON__P01966	5	2	2		1	5	2	2	2	2	2	2	1	3	3	0	3	3	1	1	3	3	0	5	4	1	3	3	0	0	0	0	0	0	0	0	0	0	1	0	0	1	1	0	2	1	0	2
sp|P02533|K1C14_HUMANKeratin,typeIcytoskeletal14OS=HomosapiensGN=KRT14PE=1SV=4;CON__P02533;sp|P19012|K1C15_HUMANKeratin,typeIcytoskeletal15OS=HomosapiensGN=KRT15PE=1SV=3;CON__P19012;CON__A2A4G1;CON__Q9Z2K1;CON__Q3ZAW8;CON__Q61782;tr|K7ENV3|K7ENV3_HUMANKeratin,typeIcytoskeletal16(Fragment)OS=HomosapiensGN=KRT16PE=4SV=8	sp|P02533|K1C14_HUMANKeratin,typeIcytoskeletal14OS=HomosapiensGN=KRT14PE=1SV=4;CON__P02533	14;14;5;5;5;4;4;3;2	11;11;3;3;2;2;2;3;2	2;2;0;0;0;0;0;1;0	;	9	14	11	2	6	7	10	8	2	6	3	1	8	3	3	6	6	7	1	2	0	2	1	3	1	6	6	8	6	2	4	3	1	6	3	3	6	6	7	0	1	0	1	0
sp|P02538|K2C6A_HUMANKeratin,typeIIcytoskeletal6AOS=HomosapiensGN=KRT6APE=1SV=3;CON__P02538;sp|O95678|K2C75_HUMANKeratin,typeIIcytoskeletal75OS=HomosapiensGN=KRT75PE=1SV=2;CON__O95678;CON__Q8VED5;CON__H-INV:HIT000016045;tr|Q8IWY7|Q8IWY7_HUMANTau-tubulinkinaseOS=HomosapiensGN=TTBK2PE=1SV=1	sp|P02538|K2C6A_HUMANKeratin,typeIIcytoskeletal6AOS=HomosapiensGN=KRT6APE=1SV=3;CON__P02538	23;23;7;7;6;3;1	1;1;0;0;0;0;0	1;1;0;0;0;0;0	;	7	23	1	1	6	9	11	10	3	9	3	0	9	3	8	14	10	13	2	2	2	1	0	5	0	0	0	0	0	0	1	0	0	1	0	0	0	1	0	0	0	0	0	0
CON__P02662	CON__P02662	3	3	3		1	3	3	3	1	0	0	1	0	1	1	0	0	1	0	0	0	0	0	0	0	0	1	1	0	1	0	0	1	0	1	1	0	0	1	0	0	0	0	0	0	0	0	1
CON__P02666	CON__P02666	2	2	2		1	2	2	2	0	0	0	0	0	0	0	0	0	0	0	0	0	0	0	1	2	0	0	0	0	0	0	0	0	0	0	0	0	0	0	0	0	0	0	0	1	2	0	0
CON__P02754	CON__P02754	1	1	1		1	1	1	1	1	0	0	0	0	0	0	0	0	0	0	0	0	0	0	0	0	0	0	0	0	1	0	0	0	0	0	0	0	0	0	0	0	0	0	0	0	0	0	0
sp|P02768|ALBU_HUMANSerumalbuminOS=HomosapiensGN=ALBPE=1SV=2;CON__P02768-1;tr|A0A0C4DGB6|A0A0C4DGB6_HUMANSerumalbuminOS=HomosapiensGN=ALBPE=1SV=1;tr|B7WNR0|B7WNR0_HUMANSerumalbuminOS=HomosapiensGN=ALBPE=1SV=1;tr|H0YA55|H0YA55_HUMANSerumalbumin(Fragment)OS=HomosapiensGN=ALBPE=1SV=1;tr|D6RHD5|D6RHD5_HUMANSerumalbuminOS=HomosapiensGN=ALBPE=1SV=1;tr|C9JKR2|C9JKR2_HUMANAlbumin,isoformCRA_kOS=Homosapie…	sp|P02768|ALBU_HUMANSerumalbuminOS=HomosapiensGN=ALBPE=1SV=2;CON__P02768-1;tr|A0A0C4DGB6|A0A0C4DGB6_HUMANSerumalbuminOS=HomosapiensGN=ALBPE=1SV=1;tr|B7WNR0|B7WNR0_HUMANSerumalbuminOS=HomosapiensGN=ALBPE=1SV=1;tr|H0YA55|H0YA55_HUMANSerumalbumin(Fragment)OS=HomosapiensGN=ALBPE=1SV=1;tr|D6RHD5|D6RHD5_HUMANSerumalbuminOS=HomosapiensGN=ALBPE=1SV=1;tr|C9JKR2|C9JKR2_HUMANAlbumin,isoformCRA_kOS=Homosapie…	111;111;105;84;82;79;67;64;35	111;111;105;84;82;79;67;64;35	104;104;98;79;75;74;62;60;33	;;;;;;;	9	111	111	104	43	39	49	55	7	35	20	4	25	18	37	30	50	41	8	96	104	15	9	17	4	43	39	49	55	7	35	20	4	25	18	37	30	50	41	8	96	104	15	9
CON__P02769	CON__P02769	48	41	41		1	48	41	41	15	20	15	12	20	19	40	20	12	21	10	6	7	6	3	30	24	5	3	7	4	9	14	8	6	18	14	34	17	8	17	6	3	3	3	1	25	18	5	2
CON__P04259;sp|P48668|K2C6C_HUMANKeratin,typeIIcytoskeletal6COS=HomosapiensGN=KRT6CPE=1SV=3;CON__P48668	CON__P04259;sp|P48668|K2C6C_HUMANKeratin,typeIIcytoskeletal6COS=HomosapiensGN=KRT6CPE=1SV=3;CON__P48668	24;23;23	16;15;15	0;0;0	;;	3	24	16	0	6	9	12	10	3	8	3	0	8	3	8	16	11	15	2	2	2	1	0	5	0	2	5	7	6	2	5	1	0	6	1	5	12	6	11	1	1	1	1	0
sp|P05787|K2C8_HUMANKeratin,typeIIcytoskeletal8OS=HomosapiensGN=KRT8PE=1SV=7;CON__P05787;tr|F8VUG2|F8VUG2_HUMANKeratin,typeIIcytoskeletal8(Fragment)OS=HomosapiensGN=KRT8PE=1SV=1;tr|F8W1U3|F8W1U3_HUMANKeratin,typeIIcytoskeletal8(Fragment)OS=HomosapiensGN=KRT8PE=1SV=1;tr|F8VP67|F8VP67_HUMANKeratin,typeIIcytoskeletal8(Fragment)OS=HomosapiensGN=KRT8PE=1SV=1;CON__H-INV:HIT000292931;CON__Q9H552;CON__Q9…	sp|P05787|K2C8_HUMANKeratin,typeIIcytoskeletal8OS=HomosapiensGN=KRT8PE=1SV=7;CON__P05787;tr|F8VUG2|F8VUG2_HUMANKeratin,typeIIcytoskeletal8(Fragment)OS=HomosapiensGN=KRT8PE=1SV=1;tr|F8W1U3|F8W1U3_HUMANKeratin,typeIIcytoskeletal8(Fragment)OS=HomosapiensGN=KRT8PE=1SV=1	9;9;6;5;4;4;3;2;2;2;2;2;2;2;1	3;3;2;1;1;2;1;0;0;0;0;0;0;0;1	3;3;2;1;1;2;1;0;0;0;0;0;0;0;1	;;;	15	9	3	3	2	2	3	2	0	4	2	1	2	2	3	2	3	2	1	0	0	0	0	2	0	0	0	0	1	0	2	1	1	1	2	1	0	0	0	0	0	0	0	0
tr|H0Y8D1|H0Y8D1_HUMANTrypsin-1(Fragment)OS=HomosapiensGN=PRSS1PE=1SV=1;tr|A6XMV8|A6XMV8_HUMANProteaseserine2preproproteinOS=HomosapiensGN=PRSS2PE=1SV=1;tr|A0A0J9YYC8|A0A0J9YYC8_HUMANTrypsin-2OS=HomosapiensGN=PRSS2PE=1SV=1;sp|Q8NHM4|TRY6_HUMANPutativetrypsin-6OS=HomosapiensGN=PRSS3P2PE=5SV=2;sp|P07478|TRY2_HUMANTrypsin-2OS=HomosapiensGN=PRSS2PE=1SV=1;sp|P07477|TRY1_HUMANTrypsin-1OS=HomosapiensGN=…	tr|H0Y8D1|H0Y8D1_HUMANTrypsin-1(Fragment)OS=HomosapiensGN=PRSS1PE=1SV=1;tr|A6XMV8|A6XMV8_HUMANProteaseserine2preproproteinOS=HomosapiensGN=PRSS2PE=1SV=1;tr|A0A0J9YYC8|A0A0J9YYC8_HUMANTrypsin-2OS=HomosapiensGN=PRSS2PE=1SV=1;sp|Q8NHM4|TRY6_HUMANPutativetrypsin-6OS=HomosapiensGN=PRSS3P2PE=5SV=2;sp|P07478|TRY2_HUMANTrypsin-2OS=HomosapiensGN=PRSS2PE=1SV=1;sp|P07477|TRY1_HUMANTrypsin-1OS=HomosapiensGN=…	1;1;1;1;1;1;1;1;1	1;1;1;1;1;1;1;1;1	1;1;1;1;1;1;1;1;1	;;;;;;;;	9	1	1	1	1	0	1	1	1	1	1	0	1	1	0	0	1	1	0	0	0	0	0	0	0	1	0	1	1	1	1	1	0	1	1	0	0	1	1	0	0	0	0	0
sp|P08727|K1C19_HUMANKeratin,typeIcytoskeletal19OS=HomosapiensGN=KRT19PE=1SV=4;CON__P08727;tr|C9JM50|C9JM50_HUMANKeratin,typeIcytoskeletal19(Fragment)OS=HomosapiensGN=KRT19PE=1SV=1;CON__P19001;tr|K7EPJ9|K7EPJ9_HUMANKeratin,typeIcytoskeletal17(Fragment)OS=HomosapiensGN=KRT17PE=1SV=1;tr|A8MT21|A8MT21_HUMANKeratin,typeIcytoskeletal15OS=HomosapiensGN=KRT15PE=1SV=1;tr|F8VZY9|F8VZY9_HUMANKeratin,typeIc…	sp|P08727|K1C19_HUMANKeratin,typeIcytoskeletal19OS=HomosapiensGN=KRT19PE=1SV=4;CON__P08727;tr|C9JM50|C9JM50_HUMANKeratin,typeIcytoskeletal19(Fragment)OS=HomosapiensGN=KRT19PE=1SV=1	13;13;7;5;3;2;2;2;2;2;2;1;1;1;1;1;1	9;9;4;1;0;0;1;1;1;1;1;0;0;0;0;0;0	3;3;1;1;0;0;1;1;1;0;0;0;0;0;0;0;0	;;	17	13	9	3	5	1	8	6	1	7	5	2	5	4	6	6	4	8	1	4	0	2	2	3	2	4	0	5	4	0	4	3	1	2	2	5	4	2	6	0	2	0	0	1
sp|P08779|K1C16_HUMANKeratin,typeIcytoskeletal16OS=HomosapiensGN=KRT16PE=1SV=4;CON__P08779;tr|K7ENW6|K7ENW6_HUMANKeratin,typeIcytoskeletal16(Fragment)OS=HomosapiensGN=KRT16PE=1SV=1	sp|P08779|K1C16_HUMANKeratin,typeIcytoskeletal16OS=HomosapiensGN=KRT16PE=1SV=4;CON__P08779	12;12;3	3;3;2	3;3;2	;	3	12	3	3	4	5	8	7	2	5	3	1	7	3	2	5	5	5	1	2	0	3	1	4	1	1	1	1	1	0	1	0	0	1	0	1	1	1	1	0	0	0	1	0
CON__P12763	CON__P12763	4	2	2		1	4	2	2	1	1	2	1	0	1	1	0	0	0	0	1	0	1	0	3	1	0	0	0	0	0	0	0	0	0	0	0	0	0	0	0	0	0	0	0	2	0	0	0
sp|P13645|K1C10_HUMANKeratin,typeIcytoskeletal10OS=HomosapiensGN=KRT10PE=1SV=6;CON__P13645;sp|Q7Z3Y7|K1C28_HUMANKeratin,typeIcytoskeletal28OS=HomosapiensGN=KRT28PE=1SV=2;CON__Q148H6;CON__Q7Z3Y7;sp|Q7Z3Z0|K1C25_HUMANKeratin,typeIcytoskeletal25OS=HomosapiensGN=KRT25PE=1SV=1;CON__Q7Z3Z0;sp|Q7Z3Y8|K1C27_HUMANKeratin,typeIcytoskeletal27OS=HomosapiensGN=KRT27PE=1SV=2;CON__Q7Z3Y8;sp|Q2M2I5|K1C24_HUMANKe…	sp|P13645|K1C10_HUMANKeratin,typeIcytoskeletal10OS=HomosapiensGN=KRT10PE=1SV=6;CON__P13645	23;23;3;3;3;2;2;2;2;2;2;1;1	23;23;3;3;3;2;2;2;2;2;2;1;1	14;14;1;1;1;1;1;1;1;0;0;0;0	;	13	23	23	14	17	15	19	18	11	12	1	0	15	7	14	17	17	17	1	3	1	2	2	6	1	17	15	19	18	11	12	1	0	15	7	14	17	17	17	1	3	1	2	2
CON__P13646-1	CON__P13646-1	9	5	1		1	9	5	1	3	2	2	1	3	4	5	0	2	5	1	3	3	7	0	1	1	0	0	1	0	0	1	0	0	1	2	3	0	0	2	0	0	0	4	0	0	1	0	0
sp|P13647|K2C5_HUMANKeratin,typeIIcytoskeletal5OS=HomosapiensGN=KRT5PE=1SV=3;CON__P13647;tr|F8W0C6|F8W0C6_HUMANKeratin,typeIIcytoskeletal5(Fragment)OS=HomosapiensGN=KRT5PE=1SV=8;tr|H0YI76|H0YI76_HUMANKeratin,typeIIcytoskeletal5(Fragment)OS=HomosapiensGN=KRT5PE=1SV=1;tr|H0YIN9|H0YIN9_HUMANKeratin,typeIIcytoskeletal5(Fragment)OS=HomosapiensGN=KRT5PE=1SV=1;tr|F8VV57|F8VV57_HUMANKeratin,typeIIcytoske…	sp|P13647|K2C5_HUMANKeratin,typeIIcytoskeletal5OS=HomosapiensGN=KRT5PE=1SV=3;CON__P13647	19;19;8;8;4;3	9;9;1;5;2;3	3;3;0;2;0;1	;	6	19	9	3	7	7	8	7	3	5	1	0	5	1	5	10	9	13	1	2	2	0	0	3	1	2	2	3	1	1	2	0	0	2	0	2	5	3	8	0	0	1	0	0
sp|P35527|K1C9_HUMANKeratin,typeIcytoskeletal9OS=HomosapiensGN=KRT9PE=1SV=3;CON__P35527;tr|K7EQQ3|K7EQQ3_HUMANKeratin,typeIcytoskeletal9OS=HomosapiensGN=KRT9PE=1SV=1	sp|P35527|K1C9_HUMANKeratin,typeIcytoskeletal9OS=HomosapiensGN=KRT9PE=1SV=3;CON__P35527;tr|K7EQQ3|K7EQQ3_HUMANKeratin,typeIcytoskeletal9OS=HomosapiensGN=KRT9PE=1SV=1	23;23;14	23;23;14	23;23;14	;;	3	23	23	23	16	13	21	21	1	7	0	0	11	6	7	14	8	14	2	0	3	1	0	7	2	16	13	21	21	1	7	0	0	11	6	7	14	8	14	2	0	3	1	0
sp|Q04695|K1C17_HUMANKeratin,typeIcytoskeletal17OS=HomosapiensGN=KRT17PE=1SV=2;CON__Q04695;CON__Q9QWL7;tr|F5GWP8|F5GWP8_HUMANKeratin,typeIcytoskeletal17OS=HomosapiensGN=KRT17PE=1SV=2;tr|K7ESE1|K7ESE1_HUMANKeratin,typeIcytoskeletal17(Fragment)OS=HomosapiensGN=KRT17PE=1SV=1	sp|Q04695|K1C17_HUMANKeratin,typeIcytoskeletal17OS=HomosapiensGN=KRT17PE=1SV=2;CON__Q04695;CON__Q9QWL7;tr|F5GWP8|F5GWP8_HUMANKeratin,typeIcytoskeletal17OS=HomosapiensGN=KRT17PE=1SV=2	10;10;10;9;2	2;2;2;2;1	2;2;2;2;1	;;;	5	10	2	2	4	3	5	3	1	4	2	1	3	2	4	6	5	8	1	3	0	2	1	3	1	0	0	0	0	0	1	0	0	0	0	0	1	2	2	0	1	0	0	0
sp|Q14525|KT33B_HUMANKeratin,typeIcuticularHa3-IIOS=HomosapiensGN=KRT33BPE=1SV=3;CON__Q14525;sp|O76009|KT33A_HUMANKeratin,typeIcuticularHa3-IOS=HomosapiensGN=KRT33APE=2SV=2;CON__Q6NTB9;CON__O76009;sp|Q15323|K1H1_HUMANKeratin,typeIcuticularHa1OS=HomosapiensGN=KRT31PE=1SV=3;CON__Q9UE12;CON__Q15323;CON__A2A5Y0;CON__Q9D646	sp|Q14525|KT33B_HUMANKeratin,typeIcuticularHa3-IIOS=HomosapiensGN=KRT33BPE=1SV=3;CON__Q14525;sp|O76009|KT33A_HUMANKeratin,typeIcuticularHa3-IOS=HomosapiensGN=KRT33APE=2SV=2;CON__Q6NTB9;CON__O76009;sp|Q15323|K1H1_HUMANKeratin,typeIcuticularHa1OS=HomosapiensGN=KRT31PE=1SV=3;CON__Q9UE12;CON__Q15323;CON__A2A5Y0;CON__Q9D646	4;4;3;3;3;3;3;3;3;2	1;1;1;1;1;0;0;0;0;0	1;1;1;1;1;0;0;0;0;0	;;;;;;;;;	10	4	1	1	0	3	1	1	0	0	0	0	1	0	1	0	0	0	1	1	0	1	1	1	2	0	1	0	0	0	0	0	0	0	0	0	0	0	0	0	0	0	0	0
CON__Q28107	CON__Q28107	1	1	1		1	1	1	1	0	0	0	0	0	0	0	0	1	0	0	0	1	0	0	0	0	0	0	0	0	0	0	0	0	0	0	0	0	1	0	0	0	1	0	0	0	0	0	0
CON__Q3SX09	CON__Q3SX09	3	1	0		1	3	1	0	2	0	1	1	1	2	2	0	2	0	2	2	3	3	1	2	2	1	0	3	1	1	0	0	0	0	0	0	0	0	0	1	1	1	1	0	0	0	0	0
CON__Q3ZBS7	CON__Q3ZBS7	3	1	1		1	3	1	1	1	2	1	1	0	1	0	0	1	0	0	0	0	0	0	2	2	0	1	1	0	0	1	0	0	0	0	0	0	0	0	0	0	0	0	0	0	0	0	0
sp|Q86YZ3|HORN_HUMANHornerinOS=HomosapiensGN=HRNRPE=1SV=2;CON__Q86YZ3	sp|Q86YZ3|HORN_HUMANHornerinOS=HomosapiensGN=HRNRPE=1SV=2;CON__Q86YZ3	1;1	1;1	1;1	;	2	1	1	1	0	0	0	0	0	0	0	0	0	0	0	0	0	1	0	0	0	0	0	0	0	0	0	0	0	0	0	0	0	0	0	0	0	0	1	0	0	0	0	0
CON__REFSEQ:XP_986630	CON__REFSEQ:XP_986630	4	2	1		1	4	2	1	0	3	1	1	0	0	0	0	1	0	1	0	0	0	1	1	0	1	1	1	2	0	2	0	0	0	0	0	0	1	0	0	0	0	0	0	0	0	0	0
REV__tr|A0A087WU76|A0A087WU76_HUMANCorticosteroid11-beta-dehydrogenaseisozyme1(Fragment)OS=HomosapiensGN=HSD11B1PE=1SV=1;REV__tr|A0A0A0MQV1|A0A0A0MQV1_HUMANCorticosteroid11-beta-dehydrogenaseisozyme1(Fragment)OS=HomosapiensGN=HSD11B1PE=1SV=6;REV__sp|P28845|DHI1_HUMANCorticosteroid11-beta-dehydrogenaseisozyme1OS=HomosapiensGN=HSD11B1PE=1SV=3	REV__tr|A0A087WU76|A0A087WU76_HUMANCorticosteroid11-beta-dehydrogenaseisozyme1(Fragment)OS=HomosapiensGN=HSD11B1PE=1SV=1;REV__tr|A0A0A0MQV1|A0A0A0MQV1_HUMANCorticosteroid11-beta-dehydrogenaseisozyme1(Fragment)OS=HomosapiensGN=HSD11B1PE=1SV=6;REV__sp|P28845|DHI1_HUMANCorticosteroid11-beta-dehydrogenaseisozyme1OS=HomosapiensGN=HSD11B1PE=1SV=3	1;1;1	1;1;1	1;1;1	;;	3	1	1	1	1	1	1	1	0	1	0	0	1	0	1	1	0	1	0	1	1	1	0	0	0	1	1	1	1	0	1	0	0	1	0	1	1	0	1	0	1	1	1	0
REV__tr|F8VYV2|F8VYV2_HUMAN60SribosomalproteinL18OS=HomosapiensGN=RPL18PE=1SV=1;REV__tr|A0A075B7A0|A0A075B7A0_HUMAN60SribosomalproteinL18OS=HomosapiensGN=RPL18PE=1SV=1;REV__tr|G3V203|G3V203_HUMAN60SribosomalproteinL18OS=HomosapiensGN=RPL18PE=1SV=1;REV__tr|H0YHA7|H0YHA7_HUMAN60SribosomalproteinL18(Fragment)OS=HomosapiensGN=RPL18PE=1SV=1;REV__sp|Q07020|RL18_HUMAN60SribosomalproteinL18OS=Homosapiens…	REV__tr|F8VYV2|F8VYV2_HUMAN60SribosomalproteinL18OS=HomosapiensGN=RPL18PE=1SV=1;REV__tr|A0A075B7A0|A0A075B7A0_HUMAN60SribosomalproteinL18OS=HomosapiensGN=RPL18PE=1SV=1;REV__tr|G3V203|G3V203_HUMAN60SribosomalproteinL18OS=HomosapiensGN=RPL18PE=1SV=1;REV__tr|H0YHA7|H0YHA7_HUMAN60SribosomalproteinL18(Fragment)OS=HomosapiensGN=RPL18PE=1SV=1;REV__sp|Q07020|RL18_HUMAN60SribosomalproteinL18OS=Homosapiens…	1;1;1;1;1;1	1;1;1;1;1;1	1;1;1;1;1;1	;;;;;	6	1	1	1	0	0	0	0	0	1	0	0	0	0	0	0	0	0	0	0	0	0	0	0	0	0	0	0	0	0	1	0	0	0	0	0	0	0	0	0	0	0	0	0
REV__tr|F8WBL2|F8WBL2_HUMANBystinOS=HomosapiensGN=BYSLPE=1SV=1;REV__sp|Q13895|BYST_HUMANBystinOS=HomosapiensGN=BYSLPE=1SV=3	REV__tr|F8WBL2|F8WBL2_HUMANBystinOS=HomosapiensGN=BYSLPE=1SV=1;REV__sp|Q13895|BYST_HUMANBystinOS=HomosapiensGN=BYSLPE=1SV=3	1;1	1;1	1;1	;	2	1	1	1	0	0	0	0	0	0	0	0	0	0	0	0	0	0	0	0	0	0	1	1	0	0	0	0	0	0	0	0	0	0	0	0	0	0	0	0	0	0	0	1
REV__sp|Q13972|RGRF1_HUMANRas-specificguaninenucleotide-releasingfactor1OS=HomosapiensGN=RASGRF1PE=1SV=2	REV__sp|Q13972|RGRF1_HUMANRas-specificguaninenucleotide-releasingfactor1OS=HomosapiensGN=RASGRF1PE=1SV=2	1	1	1		1	1	1	1	0	0	0	0	0	0	0	0	0	0	0	0	1	0	0	0	0	0	0	0	0	0	0	0	0	0	0	0	0	0	0	0	0	1	0	0	0	0	0	0
REV__tr|A0A1W2PPI4|A0A1W2PPI4_HUMANZincfingerprotein345OS=HomosapiensGN=ZNF345PE=4SV=1;REV__sp|Q14585|ZN345_HUMANZincfingerprotein345OS=HomosapiensGN=ZNF345PE=2SV=1	REV__tr|A0A1W2PPI4|A0A1W2PPI4_HUMANZincfingerprotein345OS=HomosapiensGN=ZNF345PE=4SV=1;REV__sp|Q14585|ZN345_HUMANZincfingerprotein345OS=HomosapiensGN=ZNF345PE=2SV=1	1;1	1;1	1;1	;	2	1	1	1	0	1	1	0	0	0	1	0	0	1	0	0	0	0	0	0	0	0	0	0	0	0	1	1	0	0	0	1	0	0	1	0	0	0	0	0	0	0	0	0
REV__tr|H7C1F9|H7C1F9_HUMANRalGTPase-activatingproteinsubunitalpha-2(Fragment)OS=HomosapiensGN=RALGAPA2PE=1SV=1;REV__sp|Q2PPJ7|RGPA2_HUMANRalGTPase-activatingproteinsubunitalpha-2OS=HomosapiensGN=RALGAPA2PE=1SV=2	REV__tr|H7C1F9|H7C1F9_HUMANRalGTPase-activatingproteinsubunitalpha-2(Fragment)OS=HomosapiensGN=RALGAPA2PE=1SV=1;REV__sp|Q2PPJ7|RGPA2_HUMANRalGTPase-activatingproteinsubunitalpha-2OS=HomosapiensGN=RALGAPA2PE=1SV=2	1;1	1;1	1;1	;	2	1	1	1	0	1	0	1	0	0	0	0	0	0	0	1	1	0	0	1	1	0	0	0	0	0	1	0	1	0	0	0	0	0	0	0	1	1	0	0	1	1	0	0
REV__tr|B9ZVT1|B9ZVT1_HUMANRNA-bindingprotein12BOS=HomosapiensGN=RBM12BPE=1SV=2;REV__sp|Q8IXT5|RB12B_HUMANRNA-bindingprotein12BOS=HomosapiensGN=RBM12BPE=1SV=2	REV__tr|B9ZVT1|B9ZVT1_HUMANRNA-bindingprotein12BOS=HomosapiensGN=RBM12BPE=1SV=2;REV__sp|Q8IXT5|RB12B_HUMANRNA-bindingprotein12BOS=HomosapiensGN=RBM12BPE=1SV=2	1;1	1;1	1;1	;	2	1	1	1	0	1	1	1	0	0	0	0	1	0	0	0	0	1	0	1	1	0	0	0	0	0	1	1	1	0	0	0	0	1	0	0	0	0	1	0	1	1	0	0
REV__sp|Q8N490|PNKD_HUMANProbablehydrolasePNKDOS=HomosapiensGN=PNKDPE=1SV=2	REV__sp|Q8N490|PNKD_HUMANProbablehydrolasePNKDOS=HomosapiensGN=PNKDPE=1SV=2	1	1	1		1	1	1	1	0	0	0	0	0	0	0	0	0	0	0	0	0	0	0	0	0	1	1	0	0	0	0	0	0	0	0	0	0	0	0	0	0	0	0	0	0	0	1	1
REV__sp|Q92547|TOPB1_HUMANDNAtopoisomerase2-bindingprotein1OS=HomosapiensGN=TOPBP1PE=1SV=3	REV__sp|Q92547|TOPB1_HUMANDNAtopoisomerase2-bindingprotein1OS=HomosapiensGN=TOPBP1PE=1SV=3	1	1	1		1	1	1	1	1	0	1	0	0	0	0	0	0	0	1	0	0	1	1	0	0	0	0	0	0	1	0	1	0	0	0	0	0	0	0	1	0	0	1	1	0	0	0	0
REV__tr|F5H4I5|F5H4I5_HUMANIntegralmembraneprotein2C(Fragment)OS=HomosapiensGN=ITM2CPE=1SV=1;REV__tr|E7EUS6|E7EUS6_HUMANIntegralmembraneprotein2C(Fragment)OS=HomosapiensGN=ITM2CPE=1SV=2;REV__tr|C9JG41|C9JG41_HUMANIntegralmembraneprotein2C(Fragment)OS=HomosapiensGN=ITM2CPE=1SV=1;REV__tr|B8ZZM6|B8ZZM6_HUMANIntegralmembraneprotein2COS=HomosapiensGN=ITM2CPE=1SV=2;REV__sp|Q9NQX7|ITM2C_HUMANIntegralmem…	REV__tr|F5H4I5|F5H4I5_HUMANIntegralmembraneprotein2C(Fragment)OS=HomosapiensGN=ITM2CPE=1SV=1;REV__tr|E7EUS6|E7EUS6_HUMANIntegralmembraneprotein2C(Fragment)OS=HomosapiensGN=ITM2CPE=1SV=2;REV__tr|C9JG41|C9JG41_HUMANIntegralmembraneprotein2C(Fragment)OS=HomosapiensGN=ITM2CPE=1SV=1;REV__tr|B8ZZM6|B8ZZM6_HUMANIntegralmembraneprotein2COS=HomosapiensGN=ITM2CPE=1SV=2;REV__sp|Q9NQX7|ITM2C_HUMANIntegralmem…	1;1;1;1;1	1;1;1;1;1	1;1;1;1;1	;;;;	5	1	1	1	1	0	0	0	0	0	0	0	0	0	1	1	1	1	0	0	0	0	0	0	0	1	0	0	0	0	0	0	0	0	0	1	1	1	1	0	0	0	0	0
REV__sp|Q9NX36|DJC28_HUMANDnaJhomologsubfamilyCmember28OS=HomosapiensGN=DNAJC28PE=1SV=2	REV__sp|Q9NX36|DJC28_HUMANDnaJhomologsubfamilyCmember28OS=HomosapiensGN=DNAJC28PE=1SV=2	1	1	1		1	1	1	1	0	0	0	0	0	0	1	0	0	0	0	0	0	0	0	0	0	1	1	0	0	0	0	0	0	0	0	1	0	0	0	0	0	0	0	0	0	0	1	1
REV__tr|E9PNP0|E9PNP0_HUMANOuterdensefiberprotein2-like(Fragment)OS=HomosapiensGN=ODF2LPE=1SV=1;REV__tr|H0YD68|H0YD68_HUMANOuterdensefiberprotein2-like(Fragment)OS=HomosapiensGN=ODF2LPE=1SV=1;REV__sp|Q9ULJ1|ODF2L_HUMANOuterdensefiberprotein2-likeOS=HomosapiensGN=ODF2LPE=2SV=2	REV__tr|E9PNP0|E9PNP0_HUMANOuterdensefiberprotein2-like(Fragment)OS=HomosapiensGN=ODF2LPE=1SV=1;REV__tr|H0YD68|H0YD68_HUMANOuterdensefiberprotein2-like(Fragment)OS=HomosapiensGN=ODF2LPE=1SV=1;REV__sp|Q9ULJ1|ODF2L_HUMANOuterdensefiberprotein2-likeOS=HomosapiensGN=ODF2LPE=2SV=2	1;1;1	1;1;1	1;1;1	;;	3	1	1	1	0	0	0	0	0	0	0	0	0	0	0	0	0	0	0	0	0	1	0	0	0	0	0	0	0	0	0	0	0	0	0	0	0	0	0	0	0	0	1	0
REV__sp|Q9Y4G6|TLN2_HUMANTalin-2OS=HomosapiensGN=TLN2PE=1SV=4	REV__sp|Q9Y4G6|TLN2_HUMANTalin-2OS=HomosapiensGN=TLN2PE=1SV=4	1	1	1		1	1	1	1	0	0	0	0	0	1	0	0	0	0	0	0	0	0	0	1	1	0	0	0	0	0	0	0	0	0	1	0	0	0	0	0	0	0	0	0	1	1	0	0
sp|A0A075B6H9|LV469_HUMANImmunoglobulinlambdavariable4-69OS=HomosapiensGN=IGLV4-69PE=1SV=1	sp|A0A075B6H9|LV469_HUMANImmunoglobulinlambdavariable4-69OS=HomosapiensGN=IGLV4-69PE=1SV=1	2	2	2		1	2	2	2	0	1	0	0	0	0	0	0	0	0	0	0	1	0	0	0	0	0	0	1	0	0	1	0	0	0	0	0	0	0	0	0	0	1	0	0	0	0	0	0
sp|A0A075B6I0|LV861_HUMANImmunoglobulinlambdavariable8-61OS=HomosapiensGN=IGLV8-61PE=3SV=7	sp|A0A075B6I0|LV861_HUMANImmunoglobulinlambdavariable8-61OS=HomosapiensGN=IGLV8-61PE=3SV=7	2	2	2		1	2	2	2	2	2	2	2	0	1	0	0	0	0	0	0	1	0	1	1	2	0	1	0	1	2	2	2	2	0	1	0	0	0	0	0	0	1	0	1	1	2	0	1
tr|A0A1W2PQ80|A0A1W2PQ80_HUMANImmunoglobulinlambdavariable10-54OS=HomosapiensGN=IGLV10-54PE=1SV=1;sp|A0A075B6I4|LVX54_HUMANImmunoglobulinlambdavariable10-54OS=HomosapiensGN=IGLV10-54PE=3SV=1	tr|A0A1W2PQ80|A0A1W2PQ80_HUMANImmunoglobulinlambdavariable10-54OS=HomosapiensGN=IGLV10-54PE=1SV=1;sp|A0A075B6I4|LVX54_HUMANImmunoglobulinlambdavariable10-54OS=HomosapiensGN=IGLV10-54PE=3SV=1	1;1	1;1	1;1	;	2	1	1	1	1	0	0	0	0	0	0	0	0	0	0	0	1	0	1	0	0	0	0	1	0	1	0	0	0	0	0	0	0	0	0	0	0	1	0	1	0	0	0	0
sp|A0A075B6K4|LV310_HUMANImmunoglobulinlambdavariable3-10OS=HomosapiensGN=IGLV3-10PE=3SV=2	sp|A0A075B6K4|LV310_HUMANImmunoglobulinlambdavariable3-10OS=HomosapiensGN=IGLV3-10PE=3SV=2	4	4	2		1	4	4	2	0	0	1	1	0	0	0	1	2	0	1	0	3	0	1	2	2	1	1	1	0	0	0	1	1	0	0	0	1	2	0	1	0	3	0	1	2	2	1	1
sp|A0A075B6K5|LV39_HUMANImmunoglobulinlambdavariable3-9OS=HomosapiensGN=IGLV3-9PE=3SV=1;sp|A0A075B6K2|LV312_HUMANImmunoglobulinlambdavariable3-12OS=HomosapiensGN=IGLV3-12PE=3SV=2	sp|A0A075B6K5|LV39_HUMANImmunoglobulinlambdavariable3-9OS=HomosapiensGN=IGLV3-9PE=3SV=1	3;1	3;1	1;0		2	3	3	1	1	2	3	2	0	1	0	0	1	0	0	0	2	1	0	2	2	1	1	1	0	1	2	3	2	0	1	0	0	1	0	0	0	2	1	0	2	2	1	1
sp|P01615|KVD28_HUMANImmunoglobulinkappavariable2D-28OS=HomosapiensGN=IGKV2D-28PE=1SV=2;sp|A0A075B6P5|KV228_HUMANImmunoglobulinkappavariable2-28OS=HomosapiensGN=IGKV2-28PE=3SV=1;tr|A0A087X0Q4|A0A087X0Q4_HUMANImmunoglobulinkappavariable2-40OS=HomosapiensGN=IGKV2-40PE=1SV=1;sp|P01614|KVD40_HUMANImmunoglobulinkappavariable2D-40OS=HomosapiensGN=IGKV2D-40PE=1SV=2;sp|A0A087WW87|KV240_HUMANImmunoglobuli…	sp|P01615|KVD28_HUMANImmunoglobulinkappavariable2D-28OS=HomosapiensGN=IGKV2D-28PE=1SV=2;sp|A0A075B6P5|KV228_HUMANImmunoglobulinkappavariable2-28OS=HomosapiensGN=IGKV2-28PE=3SV=1;tr|A0A087X0Q4|A0A087X0Q4_HUMANImmunoglobulinkappavariable2-40OS=HomosapiensGN=IGKV2-40PE=1SV=1;sp|P01614|KVD40_HUMANImmunoglobulinkappavariable2D-40OS=HomosapiensGN=IGKV2D-40PE=1SV=2;sp|A0A087WW87|KV240_HUMANImmunoglobuli…	4;4;3;3;3	3;3;2;2;2	3;3;2;2;2	;;;;	5	4	3	3	2	2	3	2	1	2	0	0	2	0	2	2	2	2	0	3	3	1	0	2	0	1	1	2	1	0	1	0	0	1	0	1	1	1	1	0	3	3	1	0
sp|A2NJV5|KV229_HUMANImmunoglobulinkappavariable2-29OS=HomosapiensGN=IGKV2-29PE=3SV=2;sp|A0A075B6S2|KVD29_HUMANImmunoglobulinkappavariable2D-29OS=HomosapiensGN=IGKV2D-29PE=3SV=1	sp|A2NJV5|KV229_HUMANImmunoglobulinkappavariable2-29OS=HomosapiensGN=IGKV2-29PE=3SV=2;sp|A0A075B6S2|KVD29_HUMANImmunoglobulinkappavariable2D-29OS=HomosapiensGN=IGKV2D-29PE=3SV=1	2;2	1;1	1;1	;	2	2	1	1	1	1	1	1	1	1	0	0	1	0	1	1	2	1	0	0	0	0	0	1	0	0	0	0	0	0	0	0	0	0	0	0	0	1	0	0	0	0	0	0
sp|A0A075B6S5|KV127_HUMANImmunoglobulinkappavariable1-27OS=HomosapiensGN=IGKV1-27PE=3SV=1	sp|A0A075B6S5|KV127_HUMANImmunoglobulinkappavariable1-27OS=HomosapiensGN=IGKV1-27PE=3SV=1	1	1	1		1	1	1	1	0	0	0	0	0	0	0	0	0	0	0	0	1	0	0	0	0	0	0	0	0	0	0	0	0	0	0	0	0	0	0	0	0	1	0	0	0	0	0	0
sp|P04433|KV311_HUMANImmunoglobulinkappavariable3-11OS=HomosapiensGN=IGKV3-11PE=1SV=1;sp|A0A0A0MRZ8|KVD11_HUMANImmunoglobulinkappavariable3D-11OS=HomosapiensGN=IGKV3D-11PE=3SV=6	sp|P04433|KV311_HUMANImmunoglobulinkappavariable3-11OS=HomosapiensGN=IGKV3-11PE=1SV=1;sp|A0A0A0MRZ8|KVD11_HUMANImmunoglobulinkappavariable3D-11OS=HomosapiensGN=IGKV3D-11PE=3SV=6	4;4	4;4	3;3	;	2	4	4	3	2	2	2	2	0	2	0	0	0	0	0	1	3	0	0	2	3	1	0	0	0	2	2	2	2	0	2	0	0	0	0	0	1	3	0	0	2	3	1	0
sp|A0A0A0MS15|HV349_HUMANImmunoglobulinheavyvariable3-49OS=HomosapiensGN=IGHV3-49PE=3SV=1	sp|A0A0A0MS15|HV349_HUMANImmunoglobulinheavyvariable3-49OS=HomosapiensGN=IGHV3-49PE=3SV=1	5	3	2		1	5	3	2	2	1	3	2	0	2	0	0	2	1	0	0	2	0	0	1	1	0	1	1	0	2	1	2	2	0	1	0	0	1	0	0	0	1	0	0	0	0	0	0
sp|A0A0B4J1V0|HV315_HUMANImmunoglobulinheavyvariable3-15OS=HomosapiensGN=IGHV3-15PE=3SV=1	sp|A0A0B4J1V0|HV315_HUMANImmunoglobulinheavyvariable3-15OS=HomosapiensGN=IGHV3-15PE=3SV=1	9	9	5		1	9	9	5	2	4	5	3	0	4	1	0	2	1	1	1	5	1	1	5	4	0	1	3	1	2	4	5	3	0	4	1	0	2	1	1	1	5	1	1	5	4	0	1
sp|A0A0B4J1X5|HV374_HUMANImmunoglobulinheavyvariable3-74OS=HomosapiensGN=IGHV3-74PE=3SV=1;tr|A0A075B7E8|A0A075B7E8_HUMANImmunoglobulinheavyvariable3/OR16-13(non-functional)(Fragment)OS=HomosapiensGN=IGHV3OR16-13PE=4SV=1;tr|S4R3C0|S4R3C0_HUMANUncharacterizedprotein(Fragment)OS=HomosapiensPE=4SV=1;tr|A0A075B7F1|A0A075B7F1_HUMANImmunoglobulinheavyvariable3/OR16-8(non-functional)(Fragment)OS=Homosapi…	sp|A0A0B4J1X5|HV374_HUMANImmunoglobulinheavyvariable3-74OS=HomosapiensGN=IGHV3-74PE=3SV=1	8;3;1;1;1	7;3;0;0;1	3;2;0;0;0		5	8	7	3	2	2	2	2	1	6	2	0	3	2	0	1	4	2	0	5	4	0	1	2	0	2	2	2	2	1	5	2	0	2	1	0	1	4	2	0	4	3	0	0
sp|A0A0B4J1Y9|HV372_HUMANImmunoglobulinheavyvariable3-72OS=HomosapiensGN=IGHV3-72PE=3SV=1	sp|A0A0B4J1Y9|HV372_HUMANImmunoglobulinheavyvariable3-72OS=HomosapiensGN=IGHV3-72PE=3SV=1	5	1	1		1	5	1	1	1	2	4	3	0	3	1	0	2	1	1	1	3	1	1	3	3	0	1	3	1	0	0	1	1	0	0	0	0	0	0	0	0	1	0	0	0	0	0	0
sp|A0A0C4DH25|KVD20_HUMANImmunoglobulinkappavariable3D-20OS=HomosapiensGN=IGKV3D-20PE=3SV=1	sp|A0A0C4DH25|KVD20_HUMANImmunoglobulinkappavariable3D-20OS=HomosapiensGN=IGKV3D-20PE=3SV=1	4	1	1		1	4	1	1	3	1	2	1	1	2	1	0	2	2	0	0	2	0	0	2	2	0	0	0	0	1	1	0	0	0	0	0	0	0	0	0	0	1	0	0	1	1	0	0
sp|A0A0C4DH29|HV103_HUMANImmunoglobulinheavyvariable1-3OS=HomosapiensGN=IGHV1-3PE=3SV=1;sp|P0DP01|HV108_HUMANImmunoglobulinheavyvariable1-8OS=HomosapiensGN=IGHV1-8PE=3SV=1;sp|P01743|HV146_HUMANImmunoglobulinheavyvariable1-46OS=HomosapiensGN=IGHV1-46PE=1SV=2;sp|P01742|HV169_HUMANImmunoglobulinheavyvariable1-69OS=HomosapiensGN=IGHV1-69PE=1SV=2;sp|A0A0B4J2H0|HV69D_HUMANImmunoglobulinheavyvariable1-6…	sp|A0A0C4DH29|HV103_HUMANImmunoglobulinheavyvariable1-3OS=HomosapiensGN=IGHV1-3PE=3SV=1;sp|P0DP01|HV108_HUMANImmunoglobulinheavyvariable1-8OS=HomosapiensGN=IGHV1-8PE=3SV=1;sp|P01743|HV146_HUMANImmunoglobulinheavyvariable1-46OS=HomosapiensGN=IGHV1-46PE=1SV=2;sp|P01742|HV169_HUMANImmunoglobulinheavyvariable1-69OS=HomosapiensGN=IGHV1-69PE=1SV=2;sp|A0A0B4J2H0|HV69D_HUMANImmunoglobulinheavyvariable1-6…	2;1;1;1;1	2;1;1;1;1	2;1;1;1;1	;;;;	5	2	2	2	1	1	1	1	0	0	0	0	0	0	0	1	2	1	0	1	1	0	0	0	0	1	1	1	1	0	0	0	0	0	0	0	1	2	1	0	1	1	0	0
sp|A0A0C4DH31|HV118_HUMANImmunoglobulinheavyvariable1-18OS=HomosapiensGN=IGHV1-18PE=3SV=1	sp|A0A0C4DH31|HV118_HUMANImmunoglobulinheavyvariable1-18OS=HomosapiensGN=IGHV1-18PE=3SV=1	1	1	1		1	1	1	1	0	0	0	0	0	0	0	1	0	0	0	0	1	0	0	1	1	0	0	0	0	0	0	0	0	0	0	0	1	0	0	0	0	1	0	0	1	1	0	0
sp|P01767|HV353_HUMANImmunoglobulinheavyvariable3-53OS=HomosapiensGN=IGHV3-53PE=1SV=2;sp|A0A0C4DH42|HV366_HUMANImmunoglobulinheavyvariable3-66OS=HomosapiensGN=IGHV3-66PE=3SV=1;tr|A0A0J9YVT0|A0A0J9YVT0_HUMANImmunoglobulinheavyvariable3-33(Fragment)OS=HomosapiensGN=IGHV3-33PE=4SV=1;sp|P0DP02|HVC33_HUMANImmunoglobulinheavyvariable3-30-3OS=HomosapiensGN=IGHV3-30-3PE=3SV=1;sp|P01772|HV333_HUMANImmunog…	sp|P01767|HV353_HUMANImmunoglobulinheavyvariable3-53OS=HomosapiensGN=IGHV3-53PE=1SV=2;sp|A0A0C4DH42|HV366_HUMANImmunoglobulinheavyvariable3-66OS=HomosapiensGN=IGHV3-66PE=3SV=1;tr|A0A0J9YVT0|A0A0J9YVT0_HUMANImmunoglobulinheavyvariable3-33(Fragment)OS=HomosapiensGN=IGHV3-33PE=4SV=1;sp|P0DP02|HVC33_HUMANImmunoglobulinheavyvariable3-30-3OS=HomosapiensGN=IGHV3-30-3PE=3SV=1;sp|P01772|HV333_HUMANImmunog…	5;5;5;5;5	2;2;2;2;2	0;0;0;0;0	;;;;	5	5	2	0	2	2	2	2	1	5	3	0	3	2	0	1	4	2	0	4	4	1	1	1	0	1	1	1	1	0	2	1	0	1	0	0	0	2	1	0	2	2	1	0
tr|A0A075B6R9|A0A075B6R9_HUMANImmunoglobulinkappavariable2D-24(non-functional)(Fragment)OS=HomosapiensGN=IGKV2D-24PE=4SV=1;sp|A0A0C4DH68|KV224_HUMANImmunoglobulinkappavariable2-24OS=HomosapiensGN=IGKV2-24PE=3SV=1	tr|A0A075B6R9|A0A075B6R9_HUMANImmunoglobulinkappavariable2D-24(non-functional)(Fragment)OS=HomosapiensGN=IGKV2D-24PE=4SV=1;sp|A0A0C4DH68|KV224_HUMANImmunoglobulinkappavariable2-24OS=HomosapiensGN=IGKV2-24PE=3SV=1	4;4	4;4	4;4	;	2	4	4	4	2	1	1	2	0	1	0	0	1	0	1	1	4	0	0	1	1	1	1	0	0	2	1	1	2	0	1	0	0	1	0	1	1	4	0	0	1	1	1	1
sp|P01611|KVD12_HUMANImmunoglobulinkappavariable1D-12OS=HomosapiensGN=IGKV1D-12PE=1SV=2;sp|A0A0C4DH73|KV112_HUMANImmunoglobulinkappavariable1-12OS=HomosapiensGN=IGKV1-12PE=3SV=1	sp|P01611|KVD12_HUMANImmunoglobulinkappavariable1D-12OS=HomosapiensGN=IGKV1D-12PE=1SV=2;sp|A0A0C4DH73|KV112_HUMANImmunoglobulinkappavariable1-12OS=HomosapiensGN=IGKV1-12PE=3SV=1	3;3	2;2	2;2	;	2	3	2	2	0	0	0	0	0	1	0	0	0	1	0	0	1	0	0	1	1	0	0	0	0	0	0	0	0	0	0	0	0	0	0	0	0	1	0	0	1	1	0	0
tr|A0A0G2JSC0|A0A0G2JSC0_HUMANImmunoglobulinlambdavariable5-45(Fragment)OS=HomosapiensGN=IGLV5-45PE=1SV=1;sp|A0A0G2JS06|LV539_HUMANImmunoglobulinlambdavariable5-39OS=HomosapiensGN=IGLV5-39PE=3SV=1	tr|A0A0G2JSC0|A0A0G2JSC0_HUMANImmunoglobulinlambdavariable5-45(Fragment)OS=HomosapiensGN=IGLV5-45PE=1SV=1;sp|A0A0G2JS06|LV539_HUMANImmunoglobulinlambdavariable5-39OS=HomosapiensGN=IGLV5-39PE=3SV=1	1;1	1;1	1;1	;	2	1	1	1	1	0	0	0	0	0	0	0	0	0	0	0	1	0	1	0	0	0	0	1	0	1	0	0	0	0	0	0	0	0	0	0	0	1	0	1	0	0	0	0
sp|A0A0J9YX35|HV64D_HUMANImmunoglobulinheavyvariable3-64DOS=HomosapiensGN=IGHV3-64DPE=3SV=1	sp|A0A0J9YX35|HV64D_HUMANImmunoglobulinheavyvariable3-64DOS=HomosapiensGN=IGHV3-64DPE=3SV=1	3	1	1		1	3	1	1	1	1	1	1	0	3	1	0	1	1	0	0	2	0	0	2	2	1	1	1	0	1	1	1	1	0	1	0	0	0	0	0	0	1	0	0	0	0	0	0
sp|A0A0J9YXX1|HV5X1_HUMANImmunoglobulinheavyvariable5-10-1OS=HomosapiensGN=IGHV5-10-1PE=3SV=1;sp|A0A0C4DH38|HV551_HUMANImmunoglobulinheavyvariable5-51OS=HomosapiensGN=IGHV5-51PE=3SV=1	sp|A0A0J9YXX1|HV5X1_HUMANImmunoglobulinheavyvariable5-10-1OS=HomosapiensGN=IGHV5-10-1PE=3SV=1;sp|A0A0C4DH38|HV551_HUMANImmunoglobulinheavyvariable5-51OS=HomosapiensGN=IGHV5-51PE=3SV=1	3;2	3;2	3;2	;	2	3	3	3	1	0	0	1	0	0	0	0	0	0	0	0	2	1	1	1	0	0	0	1	0	1	0	0	1	0	0	0	0	0	0	0	0	2	1	1	1	0	0	0
tr|B7Z6R6|B7Z6R6_HUMANIntraflagellartransportprotein56OS=HomosapiensGN=TTC26PE=1SV=1;sp|A0AVF1|IFT56_HUMANIntraflagellartransportprotein56OS=HomosapiensGN=TTC26PE=1SV=1;tr|B7Z2T3|B7Z2T3_HUMANIntraflagellartransportprotein56OS=HomosapiensGN=TTC26PE=1SV=1;tr|Q96CU4|Q96CU4_HUMANIntraflagellartransportprotein56OS=HomosapiensGN=TTC26PE=1SV=1	tr|B7Z6R6|B7Z6R6_HUMANIntraflagellartransportprotein56OS=HomosapiensGN=TTC26PE=1SV=1;sp|A0AVF1|IFT56_HUMANIntraflagellartransportprotein56OS=HomosapiensGN=TTC26PE=1SV=1;tr|B7Z2T3|B7Z2T3_HUMANIntraflagellartransportprotein56OS=HomosapiensGN=TTC26PE=1SV=1	3;3;2;1	3;3;2;1	3;3;2;1	;;	4	3	3	3	1	1	2	0	0	0	0	0	2	0	1	1	0	0	0	0	0	0	0	0	0	1	1	2	0	0	0	0	0	2	0	1	1	0	0	0	0	0	0	0
sp|A0M8Q6|IGLC7_HUMANImmunoglobulinlambdaconstant7OS=HomosapiensGN=IGLC7PE=1SV=3	sp|A0M8Q6|IGLC7_HUMANImmunoglobulinlambdaconstant7OS=HomosapiensGN=IGLC7PE=1SV=3	5	2	2		1	5	2	2	3	3	3	3	1	4	0	0	3	0	2	3	3	3	0	3	4	1	1	0	0	0	0	0	0	0	1	0	0	0	0	0	0	0	0	0	0	1	1	1
sp|A2RTY3|HEAT9_HUMANProteinHEATR9OS=HomosapiensGN=HEATR9PE=1SV=2	sp|A2RTY3|HEAT9_HUMANProteinHEATR9OS=HomosapiensGN=HEATR9PE=1SV=2	1	1	1		1	1	1	1	0	0	0	0	0	0	0	0	0	0	0	0	1	1	0	0	0	0	0	0	0	0	0	0	0	0	0	0	0	0	0	0	0	1	1	0	0	0	0	0
sp|A8MYP8|ODF3B_HUMANOuterdensefiberprotein3BOS=HomosapiensGN=ODF3BPE=2SV=1;tr|B5MC17|B5MC17_HUMANOuterdensefiberprotein3BOS=HomosapiensGN=ODF3BPE=1SV=1;tr|C9JUR5|C9JUR5_HUMANOuterdensefiberprotein3B(Fragment)OS=HomosapiensGN=ODF3BPE=1SV=1;tr|B5MD02|B5MD02_HUMANOuterdensefiberprotein3BOS=HomosapiensGN=ODF3BPE=1SV=1;tr|B5MCN9|B5MCN9_HUMANOuterdensefiberprotein3BOS=HomosapiensGN=ODF3BPE=1SV=1	sp|A8MYP8|ODF3B_HUMANOuterdensefiberprotein3BOS=HomosapiensGN=ODF3BPE=2SV=1;tr|B5MC17|B5MC17_HUMANOuterdensefiberprotein3BOS=HomosapiensGN=ODF3BPE=1SV=1	3;2;1;1;1	3;2;1;1;1	3;2;1;1;1	;	5	3	3	3	0	0	1	1	0	1	0	0	0	0	0	0	0	1	0	0	0	0	0	0	0	0	0	1	1	0	1	0	0	0	0	0	0	0	1	0	0	0	0	0
tr|Q5T7C4|Q5T7C4_HUMANHighmobilitygroupproteinB1OS=HomosapiensGN=HMGB1PE=1SV=1;sp|B2RPK0|HGB1A_HUMANPutativehighmobilitygroupproteinB1-like1OS=HomosapiensGN=HMGB1P1PE=5SV=1;sp|P09429|HMGB1_HUMANHighmobilitygroupproteinB1OS=HomosapiensGN=HMGB1PE=1SV=3	tr|Q5T7C4|Q5T7C4_HUMANHighmobilitygroupproteinB1OS=HomosapiensGN=HMGB1PE=1SV=1;sp|B2RPK0|HGB1A_HUMANPutativehighmobilitygroupproteinB1-like1OS=HomosapiensGN=HMGB1P1PE=5SV=1;sp|P09429|HMGB1_HUMANHighmobilitygroupproteinB1OS=HomosapiensGN=HMGB1PE=1SV=3	1;1;1	1;1;1	1;1;1	;;	3	1	1	1	0	0	0	0	0	0	0	0	0	0	1	0	0	1	0	0	0	0	0	0	0	0	0	0	0	0	0	0	0	0	0	1	0	0	1	0	0	0	0	0
sp|Q99613|EIF3C_HUMANEukaryotictranslationinitiationfactor3subunitCOS=HomosapiensGN=EIF3CPE=1SV=1;sp|B5ME19|EIFCL_HUMANEukaryotictranslationinitiationfactor3subunitC-likeproteinOS=HomosapiensGN=EIF3CLPE=3SV=1	sp|Q99613|EIF3C_HUMANEukaryotictranslationinitiationfactor3subunitCOS=HomosapiensGN=EIF3CPE=1SV=1;sp|B5ME19|EIFCL_HUMANEukaryotictranslationinitiationfactor3subunitC-likeproteinOS=HomosapiensGN=EIF3CLPE=3SV=1	2;2	2;2	2;2	;	2	2	2	2	2	0	1	1	0	0	0	0	1	0	1	1	0	1	0	0	0	0	0	0	0	2	0	1	1	0	0	0	0	1	0	1	1	0	1	0	0	0	0	0
sp|B9A064|IGLL5_HUMANImmunoglobulinlambda-likepolypeptide5OS=HomosapiensGN=IGLL5PE=2SV=2;tr|A0A0B4J231|A0A0B4J231_HUMANImmunoglobulinlambda-likepolypeptide5OS=HomosapiensGN=IGLL5PE=1SV=1;sp|P0CG04|IGLC1_HUMANImmunoglobulinlambdaconstant1OS=HomosapiensGN=IGLC1PE=1SV=1	sp|B9A064|IGLL5_HUMANImmunoglobulinlambda-likepolypeptide5OS=HomosapiensGN=IGLL5PE=2SV=2;tr|A0A0B4J231|A0A0B4J231_HUMANImmunoglobulinlambda-likepolypeptide5OS=HomosapiensGN=IGLL5PE=1SV=1;sp|P0CG04|IGLC1_HUMANImmunoglobulinlambdaconstant1OS=HomosapiensGN=IGLC1PE=1SV=1	13;13;12	5;5;4	5;5;4	;;	3	13	5	5	8	6	6	7	2	6	2	0	5	1	2	4	6	5	1	12	12	4	4	6	0	4	3	3	3	1	1	0	0	2	0	0	1	3	1	0	4	4	0	1
sp|K7EJ46|SIM22_HUMANSmallintegralmembraneprotein22OS=HomosapiensGN=SMIM22PE=2SV=1	sp|K7EJ46|SIM22_HUMANSmallintegralmembraneprotein22OS=HomosapiensGN=SMIM22PE=2SV=1	1	1	1		1	1	1	1	1	0	1	1	0	0	0	0	0	0	0	0	0	0	0	0	0	0	0	0	0	1	0	1	1	0	0	0	0	0	0	0	0	0	0	0	0	0	0	0
sp|O00160|MYO1F_HUMANUnconventionalmyosin-IfOS=HomosapiensGN=MYO1FPE=1SV=3;sp|Q12965|MYO1E_HUMANUnconventionalmyosin-IeOS=HomosapiensGN=MYO1EPE=1SV=2;tr|M0QXU2|M0QXU2_HUMANUnconventionalmyosin-If(Fragment)OS=HomosapiensGN=MYO1FPE=1SV=1;tr|H0YLE5|H0YLE5_HUMANUnconventionalmyosin-Ie(Fragment)OS=HomosapiensGN=MYO1EPE=1SV=1	sp|O00160|MYO1F_HUMANUnconventionalmyosin-IfOS=HomosapiensGN=MYO1FPE=1SV=3;sp|Q12965|MYO1E_HUMANUnconventionalmyosin-IeOS=HomosapiensGN=MYO1EPE=1SV=2;tr|M0QXU2|M0QXU2_HUMANUnconventionalmyosin-If(Fragment)OS=HomosapiensGN=MYO1FPE=1SV=1;tr|H0YLE5|H0YLE5_HUMANUnconventionalmyosin-Ie(Fragment)OS=HomosapiensGN=MYO1EPE=1SV=1	2;2;1;1	2;2;1;1	2;2;1;1	;;;	4	2	2	2	2	1	1	1	0	1	0	0	1	0	1	1	0	1	0	0	0	0	0	0	0	2	1	1	1	0	1	0	0	1	0	1	1	0	1	0	0	0	0	0
tr|H3BNG6|H3BNG6_HUMANSynaptosomal-associatedprotein23OS=HomosapiensGN=SNAP23PE=1SV=1;tr|H3BU94|H3BU94_HUMANSynaptosomal-associatedprotein23OS=HomosapiensGN=SNAP23PE=1SV=1;tr|H3BNE1|H3BNE1_HUMANSynaptosomal-associatedprotein23OS=HomosapiensGN=SNAP23PE=1SV=1;tr|H3BR18|H3BR18_HUMANSynaptosomal-associatedprotein(Fragment)OS=HomosapiensGN=SNAP23PE=1SV=1;tr|H3BM38|H3BM38_HUMANSynaptosomal-associatedpr…	tr|H3BNG6|H3BNG6_HUMANSynaptosomal-associatedprotein23OS=HomosapiensGN=SNAP23PE=1SV=1;tr|H3BU94|H3BU94_HUMANSynaptosomal-associatedprotein23OS=HomosapiensGN=SNAP23PE=1SV=1;tr|H3BNE1|H3BNE1_HUMANSynaptosomal-associatedprotein23OS=HomosapiensGN=SNAP23PE=1SV=1;tr|H3BR18|H3BR18_HUMANSynaptosomal-associatedprotein(Fragment)OS=HomosapiensGN=SNAP23PE=1SV=1;tr|H3BM38|H3BM38_HUMANSynaptosomal-associatedpr…	1;1;1;1;1;1;1	1;1;1;1;1;1;1	1;1;1;1;1;1;1	;;;;;;	7	1	1	1	0	0	0	0	0	0	0	0	0	0	0	0	0	0	0	1	1	0	0	0	0	0	0	0	0	0	0	0	0	0	0	0	0	0	0	0	1	1	0	0
sp|O00182|LEG9_HUMANGalectin-9OS=HomosapiensGN=LGALS9PE=1SV=2	sp|O00182|LEG9_HUMANGalectin-9OS=HomosapiensGN=LGALS9PE=1SV=2	1	1	1		1	1	1	1	1	0	0	0	0	0	0	0	0	0	1	1	0	1	0	0	0	0	0	0	0	1	0	0	0	0	0	0	0	0	0	1	1	0	1	0	0	0	0	0
sp|O00231|PSD11_HUMAN26Sproteasomenon-ATPaseregulatorysubunit11OS=HomosapiensGN=PSMD11PE=1SV=3;tr|J3QRY4|J3QRY4_HUMAN26Sproteasomenon-ATPaseregulatorysubunit11(Fragment)OS=HomosapiensGN=PSMD11PE=1SV=8	sp|O00231|PSD11_HUMAN26Sproteasomenon-ATPaseregulatorysubunit11OS=HomosapiensGN=PSMD11PE=1SV=3;tr|J3QRY4|J3QRY4_HUMAN26Sproteasomenon-ATPaseregulatorysubunit11(Fragment)OS=HomosapiensGN=PSMD11PE=1SV=8	3;2	3;2	3;2	;	2	3	3	3	2	1	1	1	0	2	2	0	2	0	1	1	0	1	0	0	0	0	0	0	0	2	1	1	1	0	2	2	0	2	0	1	1	0	1	0	0	0	0	0
sp|O75610|LFTY1_HUMANLeft-rightdeterminationfactor1OS=HomosapiensGN=LEFTY1PE=2SV=1;sp|O00292|LFTY2_HUMANLeft-rightdeterminationfactor2OS=HomosapiensGN=LEFTY2PE=1SV=2	sp|O75610|LFTY1_HUMANLeft-rightdeterminationfactor1OS=HomosapiensGN=LEFTY1PE=2SV=1;sp|O00292|LFTY2_HUMANLeft-rightdeterminationfactor2OS=HomosapiensGN=LEFTY2PE=1SV=2	1;1	1;1	1;1	;	2	1	1	1	0	0	0	0	0	0	0	0	0	0	0	1	0	0	0	0	0	0	0	0	0	0	0	0	0	0	0	0	0	0	0	0	1	0	0	0	0	0	0	0
sp|O00299|CLIC1_HUMANChlorideintracellularchannelprotein1OS=HomosapiensGN=CLIC1PE=1SV=4	sp|O00299|CLIC1_HUMANChlorideintracellularchannelprotein1OS=HomosapiensGN=CLIC1PE=1SV=4	18	18	18		1	18	18	18	11	7	11	11	3	18	16	0	16	11	5	3	1	8	1	7	1	2	0	3	0	11	7	11	11	3	18	16	0	16	11	5	3	1	8	1	7	1	2	0
	sp|O00391|QSOX1_HUMANSulfhydryloxidase1OS=HomosapiensGN=QSOX1PE=1SV=3	9;1	9;1	9;1		2	9	9	9	5	5	7	6	0	2	3	0	2	1	1	2	2	3	0	6	4	1	0	0	0	5	5	7	6	0	2	3	0	2	1	1	2	2	3	0	6	4	1	0
sp|O00410|IPO5_HUMANImportin-5OS=HomosapiensGN=IPO5PE=1SV=4;tr|H0Y8C6|H0Y8C6_HUMANImportin-5(Fragment)OS=HomosapiensGN=IPO5PE=1SV=1;sp|O60518|RNBP6_HUMANRan-bindingprotein6OS=HomosapiensGN=RANBP6PE=1SV=2	sp|O00410|IPO5_HUMANImportin-5OS=HomosapiensGN=IPO5PE=1SV=4;tr|H0Y8C6|H0Y8C6_HUMANImportin-5(Fragment)OS=HomosapiensGN=IPO5PE=1SV=1;sp|O60518|RNBP6_HUMANRan-bindingprotein6OS=HomosapiensGN=RANBP6PE=1SV=2	1;1;1	1;1;1	1;1;1	;;	3	1	1	1	0	0	0	0	0	0	0	0	1	0	1	0	0	1	0	0	0	0	0	0	0	0	0	0	0	0	0	0	0	1	0	1	0	0	1	0	0	0	0	0
sp|O00560|SDCB1_HUMANSyntenin-1OS=HomosapiensGN=SDCBPPE=1SV=1;tr|B4DHN5|B4DHN5_HUMANSyntenin-1OS=HomosapiensGN=SDCBPPE=1SV=1;tr|E9PBU7|E9PBU7_HUMANSyntenin-1OS=HomosapiensGN=SDCBPPE=1SV=1;tr|G5EA09|G5EA09_HUMANSyndecanbindingprotein(Syntenin),isoformCRA_aOS=HomosapiensGN=SDCBPPE=1SV=1	sp|O00560|SDCB1_HUMANSyntenin-1OS=HomosapiensGN=SDCBPPE=1SV=1;tr|B4DHN5|B4DHN5_HUMANSyntenin-1OS=HomosapiensGN=SDCBPPE=1SV=1;tr|E9PBU7|E9PBU7_HUMANSyntenin-1OS=HomosapiensGN=SDCBPPE=1SV=1;tr|G5EA09|G5EA09_HUMANSyndecanbindingprotein(Syntenin),isoformCRA_aOS=HomosapiensGN=SDCBPPE=1SV=1	7;6;6;5	7;6;6;5	7;6;6;5	;;;	4	7	7	7	2	4	4	4	2	4	2	0	4	2	3	4	2	4	1	3	2	1	1	2	1	2	4	4	4	2	4	2	0	4	2	3	4	2	4	1	3	2	1	1
tr|A0A0D9SFB3|A0A0D9SFB3_HUMANATP-dependentRNAhelicaseDDX3XOS=HomosapiensGN=DDX3XPE=1SV=1;tr|A0A0D9SG12|A0A0D9SG12_HUMANATP-dependentRNAhelicaseDDX3XOS=HomosapiensGN=DDX3XPE=1SV=1;sp|O15523|DDX3Y_HUMANATP-dependentRNAhelicaseDDX3YOS=HomosapiensGN=DDX3YPE=1SV=2;sp|O00571|DDX3X_HUMANATP-dependentRNAhelicaseDDX3XOS=HomosapiensGN=DDX3XPE=1SV=3;tr|A0A0D9SF53|A0A0D9SF53_HUMANATP-dependentRNAhelicaseDDX…	tr|A0A0D9SFB3|A0A0D9SFB3_HUMANATP-dependentRNAhelicaseDDX3XOS=HomosapiensGN=DDX3XPE=1SV=1;tr|A0A0D9SG12|A0A0D9SG12_HUMANATP-dependentRNAhelicaseDDX3XOS=HomosapiensGN=DDX3XPE=1SV=1;sp|O15523|DDX3Y_HUMANATP-dependentRNAhelicaseDDX3YOS=HomosapiensGN=DDX3YPE=1SV=2;sp|O00571|DDX3X_HUMANATP-dependentRNAhelicaseDDX3XOS=HomosapiensGN=DDX3XPE=1SV=3;tr|A0A0D9SF53|A0A0D9SF53_HUMANATP-dependentRNAhelicaseDDX…	2;2;2;2;2;1;1;1;1;1	2;2;2;2;2;1;1;1;1;1	1;1;1;1;1;0;0;0;0;0	;;;;;;;;;	10	2	2	1	1	1	0	1	0	0	0	0	0	0	1	0	0	1	1	0	0	0	0	0	0	1	1	0	1	0	0	0	0	0	0	1	0	0	1	1	0	0	0	0
sp|O00592|PODXL_HUMANPodocalyxinOS=HomosapiensGN=PODXLPE=1SV=2	sp|O00592|PODXL_HUMANPodocalyxinOS=HomosapiensGN=PODXLPE=1SV=2	1	1	1		1	1	1	1	0	1	1	1	0	0	0	0	0	0	0	0	0	0	0	0	0	0	0	0	0	0	1	1	1	0	0	0	0	0	0	0	0	0	0	0	0	0	0	0
sp|O00602|FCN1_HUMANFicolin-1OS=HomosapiensGN=FCN1PE=1SV=2;tr|A0A087WVE2|A0A087WVE2_HUMANFicolin-1OS=HomosapiensGN=FCN1PE=1SV=1	sp|O00602|FCN1_HUMANFicolin-1OS=HomosapiensGN=FCN1PE=1SV=2	3;1	3;1	3;1		2	3	3	3	0	1	1	2	1	1	0	0	1	0	0	0	1	0	0	1	0	0	0	0	0	0	1	1	2	1	1	0	0	1	0	0	0	1	0	0	1	0	0	0
sp|O00764|PDXK_HUMANPyridoxalkinaseOS=HomosapiensGN=PDXKPE=1SV=1;tr|A8MV33|A8MV33_HUMANHCG401289,isoformCRA_bOS=HomosapiensGN=PDXKPE=1SV=1;tr|F2Z2Y4|F2Z2Y4_HUMANPyridoxalkinaseOS=HomosapiensGN=PDXKPE=1SV=1	sp|O00764|PDXK_HUMANPyridoxalkinaseOS=HomosapiensGN=PDXKPE=1SV=1;tr|A8MV33|A8MV33_HUMANHCG401289,isoformCRA_bOS=HomosapiensGN=PDXKPE=1SV=1;tr|F2Z2Y4|F2Z2Y4_HUMANPyridoxalkinaseOS=HomosapiensGN=PDXKPE=1SV=1	2;1;1	2;1;1	2;1;1	;;	3	2	2	2	1	0	1	1	0	1	2	0	2	0	0	0	0	0	0	0	1	0	0	0	0	1	0	1	1	0	1	2	0	2	0	0	0	0	0	0	0	1	0	0
sp|O14610|GBGT2_HUMANGuaninenucleotide-bindingproteinG(I)/G(S)/G(O)subunitgamma-T2OS=HomosapiensGN=GNGT2PE=2SV=1;tr|D6RDH5|D6RDH5_HUMANGuaninenucleotide-bindingproteinsubunitgammaOS=HomosapiensGN=GNGT2PE=1SV=1	sp|O14610|GBGT2_HUMANGuaninenucleotide-bindingproteinG(I)/G(S)/G(O)subunitgamma-T2OS=HomosapiensGN=GNGT2PE=2SV=1;tr|D6RDH5|D6RDH5_HUMANGuaninenucleotide-bindingproteinsubunitgammaOS=HomosapiensGN=GNGT2PE=1SV=1	1;1	1;1	1;1	;	2	1	1	1	1	1	1	1	0	0	0	0	0	0	0	0	0	0	0	0	0	0	0	0	0	1	1	1	1	0	0	0	0	0	0	0	0	0	0	0	0	0	0	0
sp|O14745|NHRF1_HUMANNa(+)/H(+)exchangeregulatorycofactorNHE-RF1OS=HomosapiensGN=SLC9A3R1PE=1SV=4;tr|J3QRP6|J3QRP6_HUMANNa(+)/H(+)exchangeregulatorycofactorNHE-RF1(Fragment)OS=HomosapiensGN=SLC9A3R1PE=1SV=1;tr|J3QRA3|J3QRA3_HUMANNa(+)/H(+)exchangeregulatorycofactorNHE-RF1(Fragment)OS=HomosapiensGN=SLC9A3R1PE=1SV=1	sp|O14745|NHRF1_HUMANNa(+)/H(+)exchangeregulatorycofactorNHE-RF1OS=HomosapiensGN=SLC9A3R1PE=1SV=4;tr|J3QRP6|J3QRP6_HUMANNa(+)/H(+)exchangeregulatorycofactorNHE-RF1(Fragment)OS=HomosapiensGN=SLC9A3R1PE=1SV=1	11;7;2	11;7;2	11;7;2	;	3	11	11	11	5	6	6	5	1	3	0	0	1	0	3	2	1	1	1	8	8	5	2	6	1	5	6	6	5	1	3	0	0	1	0	3	2	1	1	1	8	8	5	2
sp|O14773|TPP1_HUMANTripeptidyl-peptidase1OS=HomosapiensGN=TPP1PE=1SV=2	sp|O14773|TPP1_HUMANTripeptidyl-peptidase1OS=HomosapiensGN=TPP1PE=1SV=2	1	1	1		1	1	1	1	0	0	0	0	0	0	0	0	0	0	1	1	0	1	0	0	0	0	0	0	0	0	0	0	0	0	0	0	0	0	0	1	1	0	1	0	0	0	0	0
sp|O14791|APOL1_HUMANApolipoproteinL1OS=HomosapiensGN=APOL1PE=1SV=5;tr|B1AH96|B1AH96_HUMANApolipoproteinL1(Fragment)OS=HomosapiensGN=APOL1PE=1SV=8	sp|O14791|APOL1_HUMANApolipoproteinL1OS=HomosapiensGN=APOL1PE=1SV=5	5;1	5;1	5;1		2	5	5	5	1	0	0	0	0	0	0	0	1	0	0	0	5	2	0	0	0	0	0	0	0	1	0	0	0	0	0	0	0	1	0	0	0	5	2	0	0	0	0	0
sp|O14818|PSA7_HUMANProteasomesubunitalphatype-7OS=HomosapiensGN=PSMA7PE=1SV=1;tr|H0Y586|H0Y586_HUMANProteasomeendopeptidasecomplex(Fragment)OS=HomosapiensGN=PSMA7PE=1SV=1;tr|A0A087WYS6|A0A087WYS6_HUMANProteasomeendopeptidasecomplexOS=HomosapiensGN=PSMA8PE=1SV=1;sp|Q8TAA3|PSA7L_HUMANProteasomesubunitalphatype-7-likeOS=HomosapiensGN=PSMA8PE=2SV=3	sp|O14818|PSA7_HUMANProteasomesubunitalphatype-7OS=HomosapiensGN=PSMA7PE=1SV=1;tr|H0Y586|H0Y586_HUMANProteasomeendopeptidasecomplex(Fragment)OS=HomosapiensGN=PSMA7PE=1SV=1	4;3;1;1	4;3;1;1	4;3;1;1	;	4	4	4	4	3	1	2	2	0	1	1	0	1	1	2	2	1	2	1	1	1	0	0	1	1	3	1	2	2	0	1	1	0	1	1	2	2	1	2	1	1	1	0	0
sp|P19105|ML12A_HUMANMyosinregulatorylightchain12AOS=HomosapiensGN=MYL12APE=1SV=2;sp|O14950|ML12B_HUMANMyosinregulatorylightchain12BOS=HomosapiensGN=MYL12BPE=1SV=2;tr|J3QRS3|J3QRS3_HUMANMyosinregulatorylightchain12AOS=HomosapiensGN=MYL12APE=1SV=1;sp|P24844|MYL9_HUMANMyosinregulatorylightpolypeptide9OS=HomosapiensGN=MYL9PE=1SV=4;tr|J3KTJ1|J3KTJ1_HUMANMyosinregulatorylightchain12A(Fragment)OS=Homos…	sp|P19105|ML12A_HUMANMyosinregulatorylightchain12AOS=HomosapiensGN=MYL12APE=1SV=2;sp|O14950|ML12B_HUMANMyosinregulatorylightchain12BOS=HomosapiensGN=MYL12BPE=1SV=2;tr|J3QRS3|J3QRS3_HUMANMyosinregulatorylightchain12AOS=HomosapiensGN=MYL12APE=1SV=1;sp|P24844|MYL9_HUMANMyosinregulatorylightpolypeptide9OS=HomosapiensGN=MYL9PE=1SV=4	7;7;7;4;3	7;7;7;4;3	7;7;7;4;3	;;;	5	7	7	7	6	3	2	3	0	2	0	0	3	0	2	4	3	4	1	2	0	0	0	1	0	6	3	2	3	0	2	0	0	3	0	2	4	3	4	1	2	0	0	0
sp|O14980|XPO1_HUMANExportin-1OS=HomosapiensGN=XPO1PE=1SV=1	sp|O14980|XPO1_HUMANExportin-1OS=HomosapiensGN=XPO1PE=1SV=1	2	2	2		1	2	2	2	1	1	0	0	0	1	0	0	1	0	1	0	0	1	0	0	0	0	0	0	0	1	1	0	0	0	1	0	0	1	0	1	0	0	1	0	0	0	0	0
sp|O15143|ARC1B_HUMANActin-relatedprotein2/3complexsubunit1BOS=HomosapiensGN=ARPC1BPE=1SV=3;tr|A0A1W2PNV4|A0A1W2PNV4_HUMANUncharacterizedproteinOS=HomosapiensPE=4SV=1;tr|C9J4Z7|C9J4Z7_HUMANActin-relatedprotein2/3complexsubunit1B(Fragment)OS=HomosapiensGN=ARPC1BPE=1SV=1;tr|F8VXW2|F8VXW2_HUMANActin-relatedprotein2/3complexsubunit1BOS=HomosapiensGN=ARPC1BPE=1SV=2;tr|C9JEY1|C9JEY1_HUMANActin-relatedp…	sp|O15143|ARC1B_HUMANActin-relatedprotein2/3complexsubunit1BOS=HomosapiensGN=ARPC1BPE=1SV=3;tr|A0A1W2PNV4|A0A1W2PNV4_HUMANUncharacterizedproteinOS=HomosapiensPE=4SV=1;tr|C9J4Z7|C9J4Z7_HUMANActin-relatedprotein2/3complexsubunit1B(Fragment)OS=HomosapiensGN=ARPC1BPE=1SV=1;tr|F8VXW2|F8VXW2_HUMANActin-relatedprotein2/3complexsubunit1BOS=HomosapiensGN=ARPC1BPE=1SV=2;tr|C9JEY1|C9JEY1_HUMANActin-relatedp…	14;9;7;7;7;7;7;7;6;6;5;2;2	14;9;7;7;7;7;7;7;6;6;5;2;2	14;9;7;7;7;7;7;7;6;6;5;2;2	;;;;;;;	13	14	14	14	6	4	4	4	1	12	8	0	10	3	4	4	5	7	1	1	1	2	1	2	0	6	4	4	4	1	12	8	0	10	3	4	4	5	7	1	1	1	2	1
sp|O15144|ARPC2_HUMANActin-relatedprotein2/3complexsubunit2OS=HomosapiensGN=ARPC2PE=1SV=1;tr|C9JTV5|C9JTV5_HUMANArp2/3complex34kDasubunit(Fragment)OS=HomosapiensGN=ARPC2PE=1SV=8;tr|G5E9J0|G5E9J0_HUMANArp2/3complex34kDasubunitOS=HomosapiensGN=ARPC2PE=1SV=1;tr|G5E9S7|G5E9S7_HUMANActinrelatedprotein2/3complex,subunit2,34kDa,isoformCRA_eOS=HomosapiensGN=ARPC2PE=1SV=1;tr|H7C3F9|H7C3F9_HUMANArp2/3compl…	sp|O15144|ARPC2_HUMANActin-relatedprotein2/3complexsubunit2OS=HomosapiensGN=ARPC2PE=1SV=1	11;5;5;3;2	11;5;5;3;2	11;5;5;3;2		5	11	11	11	9	8	7	7	1	8	2	0	9	4	4	4	2	5	1	1	0	0	0	2	1	9	8	7	7	1	8	2	0	9	4	4	4	2	5	1	1	0	0	0
sp|O15145|ARPC3_HUMANActin-relatedprotein2/3complexsubunit3OS=HomosapiensGN=ARPC3PE=1SV=3;tr|C9JZD1|C9JZD1_HUMANActin-relatedprotein2/3complexsubunit3(Fragment)OS=HomosapiensGN=ARPC3PE=1SV=1;tr|F8VR50|F8VR50_HUMANActin-relatedprotein2/3complexsubunit3(Fragment)OS=HomosapiensGN=ARPC3PE=1SV=1	sp|O15145|ARPC3_HUMANActin-relatedprotein2/3complexsubunit3OS=HomosapiensGN=ARPC3PE=1SV=3;tr|C9JZD1|C9JZD1_HUMANActin-relatedprotein2/3complexsubunit3(Fragment)OS=HomosapiensGN=ARPC3PE=1SV=1	5;3;2	5;3;2	5;3;2	;	3	5	5	5	4	3	5	4	0	2	1	0	2	0	2	3	0	4	1	1	0	1	0	1	1	4	3	5	4	0	2	1	0	2	0	2	3	0	4	1	1	0	1	0
sp|O15400|STX7_HUMANSyntaxin-7OS=HomosapiensGN=STX7PE=1SV=4	sp|O15400|STX7_HUMANSyntaxin-7OS=HomosapiensGN=STX7PE=1SV=4	1	1	1		1	1	1	1	0	0	0	0	0	0	0	0	0	0	1	1	1	1	0	0	0	0	0	0	0	0	0	0	0	0	0	0	0	0	0	1	1	1	1	0	0	0	0	0
tr|Q5SZU1|Q5SZU1_HUMAND-3-phosphoglyceratedehydrogenaseOS=HomosapiensGN=PHGDHPE=1SV=1;sp|O43175|SERA_HUMAND-3-phosphoglyceratedehydrogenaseOS=HomosapiensGN=PHGDHPE=1SV=4	tr|Q5SZU1|Q5SZU1_HUMAND-3-phosphoglyceratedehydrogenaseOS=HomosapiensGN=PHGDHPE=1SV=1;sp|O43175|SERA_HUMAND-3-phosphoglyceratedehydrogenaseOS=HomosapiensGN=PHGDHPE=1SV=4	2;2	2;2	2;2	;	2	2	2	2	1	1	1	0	0	2	1	0	2	0	0	0	1	1	0	1	0	0	0	0	0	1	1	1	0	0	2	1	0	2	0	0	0	1	1	0	1	0	0	0
tr|D6RBD7|D6RBD7_HUMANEukaryotictranslationelongationfactor1epsilon-1OS=HomosapiensGN=EEF1E1PE=4SV=1;tr|C9J1V9|C9J1V9_HUMANEEF1E1-BLOC1S5readthrough(NMDcandidate)OS=HomosapiensGN=EEF1E1-BLOC1S5PE=4SV=2;sp|O43324|MCA3_HUMANEukaryotictranslationelongationfactor1epsilon-1OS=HomosapiensGN=EEF1E1PE=1SV=1	tr|D6RBD7|D6RBD7_HUMANEukaryotictranslationelongationfactor1epsilon-1OS=HomosapiensGN=EEF1E1PE=4SV=1;tr|C9J1V9|C9J1V9_HUMANEEF1E1-BLOC1S5readthrough(NMDcandidate)OS=HomosapiensGN=EEF1E1-BLOC1S5PE=4SV=2;sp|O43324|MCA3_HUMANEukaryotictranslationelongationfactor1epsilon-1OS=HomosapiensGN=EEF1E1PE=1SV=1	1;1;1	1;1;1	1;1;1	;;	3	1	1	1	0	0	1	1	0	1	1	0	1	0	0	0	0	0	0	0	0	0	0	0	0	0	0	1	1	0	1	1	0	1	0	0	0	0	0	0	0	0	0	0
sp|O43490|PROM1_HUMANProminin-1OS=HomosapiensGN=PROM1PE=1SV=1;tr|D6RIF3|D6RIF3_HUMANProminin-1(Fragment)OS=HomosapiensGN=PROM1PE=1SV=8	sp|O43490|PROM1_HUMANProminin-1OS=HomosapiensGN=PROM1PE=1SV=1	20;1	20;1	20;1		2	20	20	20	11	7	12	15	10	13	5	0	9	2	7	8	0	8	0	11	6	4	4	8	0	11	7	12	15	10	13	5	0	9	2	7	8	0	8	0	11	6	4	4
sp|O43598|DNPH1_HUMAN2'-deoxynucleoside5'-phosphateN-hydrolase1OS=HomosapiensGN=DNPH1PE=1SV=1;tr|H0Y8X4|H0Y8X4_HUMAN2'-deoxynucleoside5'-phosphateN-hydrolase1(Fragment)OS=HomosapiensGN=DNPH1PE=1SV=1	sp|O43598|DNPH1_HUMAN2'-deoxynucleoside5'-phosphateN-hydrolase1OS=HomosapiensGN=DNPH1PE=1SV=1;tr|H0Y8X4|H0Y8X4_HUMAN2'-deoxynucleoside5'-phosphateN-hydrolase1(Fragment)OS=HomosapiensGN=DNPH1PE=1SV=1	1;1	1;1	1;1	;	2	1	1	1	0	0	0	0	0	1	1	0	1	0	0	0	0	0	0	0	0	0	0	0	0	0	0	0	0	0	1	1	0	1	0	0	0	0	0	0	0	0	0	0
sp|O43653|PSCA_HUMANProstatestemcellantigenOS=HomosapiensGN=PSCAPE=1SV=1	sp|O43653|PSCA_HUMANProstatestemcellantigenOS=HomosapiensGN=PSCAPE=1SV=1	1	1	1		1	1	1	1	0	0	0	0	0	0	0	0	0	0	0	0	0	0	0	1	0	0	0	0	0	0	0	0	0	0	0	0	0	0	0	0	0	0	0	0	1	0	0	0
sp|O43707|ACTN4_HUMANAlpha-actinin-4OS=HomosapiensGN=ACTN4PE=1SV=2;tr|F5GXS2|F5GXS2_HUMANAlpha-actinin-4OS=HomosapiensGN=ACTN4PE=1SV=2;tr|H7C144|H7C144_HUMANAlpha-actinin-4(Fragment)OS=HomosapiensGN=ACTN4PE=1SV=1;tr|F6THM6|F6THM6_HUMANAlpha-actinin-2OS=HomosapiensGN=ACTN2PE=1SV=1;tr|K7EJH8|K7EJH8_HUMANAlpha-actinin-4(Fragment)OS=HomosapiensGN=ACTN4PE=1SV=1;tr|K7EP19|K7EP19_HUMANAlpha-actinin-4(Fr…	sp|O43707|ACTN4_HUMANAlpha-actinin-4OS=HomosapiensGN=ACTN4PE=1SV=2;tr|F5GXS2|F5GXS2_HUMANAlpha-actinin-4OS=HomosapiensGN=ACTN4PE=1SV=2	39;21;16;7;5;3;1;1;1;1	39;21;16;7;5;3;1;1;1;1	22;16;12;0;1;2;0;1;1;1	;	10	39	39	22	17	6	14	12	3	21	14	0	19	5	10	14	8	19	1	12	4	2	0	1	1	17	6	14	12	3	21	14	0	19	5	10	14	8	19	1	12	4	2	0
sp|O43747|AP1G1_HUMANAP-1complexsubunitgamma-1OS=HomosapiensGN=AP1G1PE=1SV=5	sp|O43747|AP1G1_HUMANAP-1complexsubunitgamma-1OS=HomosapiensGN=AP1G1PE=1SV=5	1	1	1		1	1	1	1	0	0	0	0	0	1	0	0	1	1	0	0	0	0	0	0	0	1	0	0	0	0	0	0	0	0	1	0	0	1	1	0	0	0	0	0	0	0	1	0
tr|E9PDF6|E9PDF6_HUMANUnconventionalmyosin-IbOS=HomosapiensGN=MYO1BPE=1SV=1;sp|O43795|MYO1B_HUMANUnconventionalmyosin-IbOS=HomosapiensGN=MYO1BPE=1SV=3;tr|E7EQD9|E7EQD9_HUMANUnconventionalmyosin-Ib(Fragment)OS=HomosapiensGN=MYO1BPE=1SV=1;tr|H7C2Y7|H7C2Y7_HUMANUnconventionalmyosin-Ib(Fragment)OS=HomosapiensGN=MYO1BPE=1SV=1;tr|G3V342|G3V342_HUMANUnconventionalmyosin-IaOS=HomosapiensGN=MYO1APE=1SV=1;…	tr|E9PDF6|E9PDF6_HUMANUnconventionalmyosin-IbOS=HomosapiensGN=MYO1BPE=1SV=1;sp|O43795|MYO1B_HUMANUnconventionalmyosin-IbOS=HomosapiensGN=MYO1BPE=1SV=3;tr|E7EQD9|E7EQD9_HUMANUnconventionalmyosin-Ib(Fragment)OS=HomosapiensGN=MYO1BPE=1SV=1	5;5;3;1;1;1	5;5;3;1;1;1	5;5;3;1;1;1	;;	6	5	5	5	4	4	4	4	1	2	0	0	2	0	0	0	0	0	0	0	1	0	0	0	0	4	4	4	4	1	2	0	0	2	0	0	0	0	0	0	0	1	0	0
sp|O43866|CD5L_HUMANCD5antigen-likeOS=HomosapiensGN=CD5LPE=1SV=1	sp|O43866|CD5L_HUMANCD5antigen-likeOS=HomosapiensGN=CD5LPE=1SV=1	19	19	19		1	19	19	19	3	1	1	1	0	0	1	0	1	0	3	1	13	3	0	4	11	0	0	4	1	3	1	1	1	0	0	1	0	1	0	3	1	13	3	0	4	11	0	0
sp|O43897|TLL1_HUMANTolloid-likeprotein1OS=HomosapiensGN=TLL1PE=1SV=1;tr|E9PD25|E9PD25_HUMANMetalloendopeptidaseOS=HomosapiensGN=TLL1PE=3SV=1	sp|O43897|TLL1_HUMANTolloid-likeprotein1OS=HomosapiensGN=TLL1PE=1SV=1;tr|E9PD25|E9PD25_HUMANMetalloendopeptidaseOS=HomosapiensGN=TLL1PE=3SV=1	1;1	1;1	1;1	;	2	1	1	1	0	0	0	0	0	0	0	0	0	0	0	0	0	0	0	1	1	0	0	0	0	0	0	0	0	0	0	0	0	0	0	0	0	0	0	0	1	1	0	0
tr|M0QYG8|M0QYG8_HUMANGliamaturationfactorgammaOS=HomosapiensGN=GMFGPE=1SV=1;tr|M0R1D2|M0R1D2_HUMANGliamaturationfactorgammaOS=HomosapiensGN=GMFGPE=1SV=1;tr|M0R0C1|M0R0C1_HUMANGliamaturationfactorgammaOS=HomosapiensGN=GMFGPE=1SV=1;sp|O60234|GMFG_HUMANGliamaturationfactorgammaOS=HomosapiensGN=GMFGPE=1SV=1;tr|M0QX47|M0QX47_HUMANGliamaturationfactorgammaOS=HomosapiensGN=GMFGPE=1SV=1;tr|M0QYJ8|M0QYJ8…	tr|M0QYG8|M0QYG8_HUMANGliamaturationfactorgammaOS=HomosapiensGN=GMFGPE=1SV=1;tr|M0R1D2|M0R1D2_HUMANGliamaturationfactorgammaOS=HomosapiensGN=GMFGPE=1SV=1;tr|M0R0C1|M0R0C1_HUMANGliamaturationfactorgammaOS=HomosapiensGN=GMFGPE=1SV=1;sp|O60234|GMFG_HUMANGliamaturationfactorgammaOS=HomosapiensGN=GMFGPE=1SV=1;tr|M0QX47|M0QX47_HUMANGliamaturationfactorgammaOS=HomosapiensGN=GMFGPE=1SV=1;tr|M0QYJ8|M0QYJ8…	2;2;2;2;1;1;1;1	2;2;2;2;1;1;1;1	2;2;2;2;1;1;1;1	;;;;;;;	8	2	2	2	1	0	0	0	1	1	1	0	1	1	1	1	0	1	0	0	1	0	0	0	0	1	0	0	0	1	1	1	0	1	1	1	1	0	1	0	0	1	0	0
tr|A0A0G2JMZ6|A0A0G2JMZ6_HUMANKinesin-likeprotein(Fragment)OS=HomosapiensGN=KIF5CPE=1SV=1;tr|J3KNA1|J3KNA1_HUMANKinesin-likeproteinOS=HomosapiensGN=KIF5APE=1SV=1;sp|O60282|KIF5C_HUMANKinesinheavychainisoform5COS=HomosapiensGN=KIF5CPE=1SV=1;sp|P33176|KINH_HUMANKinesin-1heavychainOS=HomosapiensGN=KIF5BPE=1SV=1;sp|Q12840|KIF5A_HUMANKinesinheavychainisoform5AOS=HomosapiensGN=KIF5APE=1SV=2	tr|A0A0G2JMZ6|A0A0G2JMZ6_HUMANKinesin-likeprotein(Fragment)OS=HomosapiensGN=KIF5CPE=1SV=1;tr|J3KNA1|J3KNA1_HUMANKinesin-likeproteinOS=HomosapiensGN=KIF5APE=1SV=1;sp|O60282|KIF5C_HUMANKinesinheavychainisoform5COS=HomosapiensGN=KIF5CPE=1SV=1;sp|P33176|KINH_HUMANKinesin-1heavychainOS=HomosapiensGN=KIF5BPE=1SV=1;sp|Q12840|KIF5A_HUMANKinesinheavychainisoform5AOS=HomosapiensGN=KIF5APE=1SV=2	2;2;2;2;2	2;2;2;2;2	2;2;2;2;2	;;;;	5	2	2	2	1	0	1	1	0	1	0	0	1	0	1	1	0	1	0	0	0	0	0	0	0	1	0	1	1	0	1	0	0	1	0	1	1	0	1	0	0	0	0	0
sp|O60284|ST18_HUMANSuppressionoftumorigenicity18proteinOS=HomosapiensGN=ST18PE=1SV=1	sp|O60284|ST18_HUMANSuppressionoftumorigenicity18proteinOS=HomosapiensGN=ST18PE=1SV=1	1	1	1		1	1	1	1	0	0	0	0	0	0	0	0	0	0	0	1	0	1	0	0	0	0	0	0	0	0	0	0	0	0	0	0	0	0	0	0	1	0	1	0	0	0	0	0
sp|O60361|NDK8_HUMANPutativenucleosidediphosphatekinaseOS=HomosapiensGN=NME2P1PE=5SV=1;tr|E7ERL0|E7ERL0_HUMANNucleosidediphosphatekinaseAOS=HomosapiensGN=NME1PE=1SV=1;sp|P22392|NDKB_HUMANNucleosidediphosphatekinaseBOS=HomosapiensGN=NME2PE=1SV=1;sp|P15531|NDKA_HUMANNucleosidediphosphatekinaseAOS=HomosapiensGN=NME1PE=1SV=1;tr|J3KPD9|J3KPD9_HUMANNME1-NME2readthroughOS=HomosapiensGN=NME1-NME2PE=1SV=1…	sp|O60361|NDK8_HUMANPutativenucleosidediphosphatekinaseOS=HomosapiensGN=NME2P1PE=5SV=1;tr|E7ERL0|E7ERL0_HUMANNucleosidediphosphatekinaseAOS=HomosapiensGN=NME1PE=1SV=1;sp|P22392|NDKB_HUMANNucleosidediphosphatekinaseBOS=HomosapiensGN=NME2PE=1SV=1;sp|P15531|NDKA_HUMANNucleosidediphosphatekinaseAOS=HomosapiensGN=NME1PE=1SV=1;tr|J3KPD9|J3KPD9_HUMANNME1-NME2readthroughOS=HomosapiensGN=NME1-NME2PE=1SV=1…	1;1;1;1;1;1	1;1;1;1;1;1	1;1;1;1;1;1	;;;;;	6	1	1	1	1	0	0	0	0	0	0	0	0	0	0	1	0	1	0	0	0	0	0	0	0	1	0	0	0	0	0	0	0	0	0	0	1	0	1	0	0	0	0	0
sp|O60493|SNX3_HUMANSortingnexin-3OS=HomosapiensGN=SNX3PE=1SV=3	sp|O60493|SNX3_HUMANSortingnexin-3OS=HomosapiensGN=SNX3PE=1SV=3	1	1	1		1	1	1	1	0	0	0	0	0	0	0	0	0	0	1	0	0	1	0	0	0	0	0	0	0	0	0	0	0	0	0	0	0	0	0	1	0	0	1	0	0	0	0	0
tr|H9KV28|H9KV28_HUMANProteindiaphanoushomolog1OS=HomosapiensGN=DIAPH1PE=1SV=2;tr|A0A140T8Z0|A0A140T8Z0_HUMANProteindiaphanoushomolog1OS=HomosapiensGN=DIAPH1PE=1SV=1;tr|A0A0G2JH68|A0A0G2JH68_HUMANProteindiaphanoushomolog1OS=HomosapiensGN=DIAPH1PE=1SV=1;sp|O60610|DIAP1_HUMANProteindiaphanoushomolog1OS=HomosapiensGN=DIAPH1PE=1SV=2	tr|H9KV28|H9KV28_HUMANProteindiaphanoushomolog1OS=HomosapiensGN=DIAPH1PE=1SV=2;tr|A0A140T8Z0|A0A140T8Z0_HUMANProteindiaphanoushomolog1OS=HomosapiensGN=DIAPH1PE=1SV=1;tr|A0A0G2JH68|A0A0G2JH68_HUMANProteindiaphanoushomolog1OS=HomosapiensGN=DIAPH1PE=1SV=1;sp|O60610|DIAP1_HUMANProteindiaphanoushomolog1OS=HomosapiensGN=DIAPH1PE=1SV=2	1;1;1;1	1;1;1;1	1;1;1;1	;;;	4	1	1	1	0	0	0	0	0	0	0	0	0	0	0	0	0	1	0	0	0	0	0	0	0	0	0	0	0	0	0	0	0	0	0	0	0	0	1	0	0	0	0	0
sp|O60635|TSN1_HUMANTetraspanin-1OS=HomosapiensGN=TSPAN1PE=1SV=2	sp|O60635|TSN1_HUMANTetraspanin-1OS=HomosapiensGN=TSPAN1PE=1SV=2	3	3	3		1	3	3	3	2	2	2	2	1	2	1	0	1	0	2	1	1	2	0	3	2	2	2	2	0	2	2	2	2	1	2	1	0	1	0	2	1	1	2	0	3	2	2	2
sp|O60664|PLIN3_HUMANPerilipin-3OS=HomosapiensGN=PLIN3PE=1SV=3;tr|K7ERZ3|K7ERZ3_HUMANPerilipin-3(Fragment)OS=HomosapiensGN=PLIN3PE=1SV=1;tr|K7EL96|K7EL96_HUMANPerilipin-3(Fragment)OS=HomosapiensGN=PLIN3PE=1SV=8;tr|K7ER39|K7ER39_HUMANPerilipin-3(Fragment)OS=HomosapiensGN=PLIN3PE=1SV=1	sp|O60664|PLIN3_HUMANPerilipin-3OS=HomosapiensGN=PLIN3PE=1SV=3;tr|K7ERZ3|K7ERZ3_HUMANPerilipin-3(Fragment)OS=HomosapiensGN=PLIN3PE=1SV=1;tr|K7EL96|K7EL96_HUMANPerilipin-3(Fragment)OS=HomosapiensGN=PLIN3PE=1SV=8	10;7;5;4	10;7;5;4	10;7;5;4	;;	4	10	10	10	4	1	2	1	0	5	3	0	3	3	4	4	1	5	0	7	2	1	0	0	0	4	1	2	1	0	5	3	0	3	3	4	4	1	5	0	7	2	1	0
sp|O60701|UGDH_HUMANUDP-glucose6-dehydrogenaseOS=HomosapiensGN=UGDHPE=1SV=1;tr|E7ER95|E7ER95_HUMANUDP-glucose6-dehydrogenase(Fragment)OS=HomosapiensGN=UGDHPE=1SV=8;tr|E7ER83|E7ER83_HUMANUDP-glucose6-dehydrogenase(Fragment)OS=HomosapiensGN=UGDHPE=1SV=1;tr|E7ETF4|E7ETF4_HUMANUDP-glucose6-dehydrogenase(Fragment)OS=HomosapiensGN=UGDHPE=1SV=1;tr|E7EV97|E7EV97_HUMANUDP-glucose6-dehydrogenase(Fragment)O…	sp|O60701|UGDH_HUMANUDP-glucose6-dehydrogenaseOS=HomosapiensGN=UGDHPE=1SV=1;tr|E7ER95|E7ER95_HUMANUDP-glucose6-dehydrogenase(Fragment)OS=HomosapiensGN=UGDHPE=1SV=8;tr|E7ER83|E7ER83_HUMANUDP-glucose6-dehydrogenase(Fragment)OS=HomosapiensGN=UGDHPE=1SV=1;tr|E7ETF4|E7ETF4_HUMANUDP-glucose6-dehydrogenase(Fragment)OS=HomosapiensGN=UGDHPE=1SV=1;tr|E7EV97|E7EV97_HUMANUDP-glucose6-dehydrogenase(Fragment)O…	4;2;2;2;2;1;1	4;2;2;2;2;1;1	4;2;2;2;2;1;1	;;;;	7	4	4	4	2	1	1	1	0	3	1	0	3	0	1	1	0	2	0	2	0	0	0	0	0	2	1	1	1	0	3	1	0	3	0	1	1	0	2	0	2	0	0	0
sp|O60749|SNX2_HUMANSortingnexin-2OS=HomosapiensGN=SNX2PE=1SV=2;tr|D6RC15|D6RC15_HUMANSortingnexin-2(Fragment)OS=HomosapiensGN=SNX2PE=1SV=8	sp|O60749|SNX2_HUMANSortingnexin-2OS=HomosapiensGN=SNX2PE=1SV=2	5;2	5;2	5;2		2	5	5	5	2	1	1	1	0	1	2	0	2	1	0	1	1	1	0	0	0	1	0	1	0	2	1	1	1	0	1	2	0	2	1	0	1	1	1	0	0	0	1	0
sp|O60763|USO1_HUMANGeneralvesiculartransportfactorp115OS=HomosapiensGN=USO1PE=1SV=2	sp|O60763|USO1_HUMANGeneralvesiculartransportfactorp115OS=HomosapiensGN=USO1PE=1SV=2	6	6	6		1	6	6	6	2	1	1	2	0	2	0	0	2	0	2	2	1	5	0	1	1	0	0	0	0	2	1	1	2	0	2	0	0	2	0	2	2	1	5	0	1	1	0	0
sp|O60814|H2B1K_HUMANHistoneH2Btype1-KOS=HomosapiensGN=HIST1H2BKPE=1SV=3;sp|P57053|H2BFS_HUMANHistoneH2BtypeF-SOS=HomosapiensGN=H2BFSPE=1SV=2	sp|O60814|H2B1K_HUMANHistoneH2Btype1-KOS=HomosapiensGN=HIST1H2BKPE=1SV=3;sp|P57053|H2BFS_HUMANHistoneH2BtypeF-SOS=HomosapiensGN=H2BFSPE=1SV=2	15;12	1;1	0;0	;	2	15	1	0	5	6	9	9	4	8	4	3	8	4	3	3	5	4	3	9	7	12	10	12	1	0	0	0	0	0	0	0	0	0	0	0	0	0	0	0	1	1	1	1
sp|O60884|DNJA2_HUMANDnaJhomologsubfamilyAmember2OS=HomosapiensGN=DNAJA2PE=1SV=1;tr|A0A087WT48|A0A087WT48_HUMANDnaJhomologsubfamilyAmember2(Fragment)OS=HomosapiensGN=DNAJA2PE=1SV=1	sp|O60884|DNJA2_HUMANDnaJhomologsubfamilyAmember2OS=HomosapiensGN=DNAJA2PE=1SV=1;tr|A0A087WT48|A0A087WT48_HUMANDnaJhomologsubfamilyAmember2(Fragment)OS=HomosapiensGN=DNAJA2PE=1SV=1	2;1	2;1	2;1	;	2	2	2	2	0	0	0	0	0	0	0	0	0	0	2	2	0	2	1	0	0	0	0	0	0	0	0	0	0	0	0	0	0	0	0	2	2	0	2	1	0	0	0	0
sp|O75083|WDR1_HUMANWDrepeat-containingprotein1OS=HomosapiensGN=WDR1PE=1SV=4;tr|D6RD66|D6RD66_HUMANWDrepeat-containingprotein1(Fragment)OS=HomosapiensGN=WDR1PE=1SV=1	sp|O75083|WDR1_HUMANWDrepeat-containingprotein1OS=HomosapiensGN=WDR1PE=1SV=4;tr|D6RD66|D6RD66_HUMANWDrepeat-containingprotein1(Fragment)OS=HomosapiensGN=WDR1PE=1SV=1	29;18	29;18	29;18	;	2	29	29	29	9	9	9	12	5	21	19	0	17	10	6	9	5	12	1	6	3	1	1	2	0	9	9	9	12	5	21	19	0	17	10	6	9	5	12	1	6	3	1	1
sp|O75131|CPNE3_HUMANCopine-3OS=HomosapiensGN=CPNE3PE=1SV=1;tr|A0A087WUS8|A0A087WUS8_HUMANCopine-3(Fragment)OS=HomosapiensGN=CPNE3PE=1SV=1;tr|A0A087WXR6|A0A087WXR6_HUMANCopine-3(Fragment)OS=HomosapiensGN=CPNE3PE=1SV=1;tr|E5RHZ0|E5RHZ0_HUMANCopine-3(Fragment)OS=HomosapiensGN=CPNE3PE=1SV=1;tr|A0A087WYQ3|A0A087WYQ3_HUMANCopine-3(Fragment)OS=HomosapiensGN=CPNE3PE=1SV=1;tr|H0YB26|H0YB26_HUMANCopine-3(…	sp|O75131|CPNE3_HUMANCopine-3OS=HomosapiensGN=CPNE3PE=1SV=1;tr|A0A087WUS8|A0A087WUS8_HUMANCopine-3(Fragment)OS=HomosapiensGN=CPNE3PE=1SV=1;tr|A0A087WXR6|A0A087WXR6_HUMANCopine-3(Fragment)OS=HomosapiensGN=CPNE3PE=1SV=1;tr|E5RHZ0|E5RHZ0_HUMANCopine-3(Fragment)OS=HomosapiensGN=CPNE3PE=1SV=1;tr|A0A087WYQ3|A0A087WYQ3_HUMANCopine-3(Fragment)OS=HomosapiensGN=CPNE3PE=1SV=1	4;2;2;2;2;1;1;1;1;1;1;1;1;1	4;2;2;2;2;1;1;1;1;1;1;1;1;1	4;2;2;2;2;1;1;1;1;1;1;1;1;1	;;;;	14	4	4	4	2	2	2	1	0	3	1	0	3	1	0	0	1	0	1	0	0	1	0	1	0	2	2	2	1	0	3	1	0	3	1	0	0	1	0	1	0	0	1	0
tr|C9J2C4|C9J2C4_HUMANDnaJhomologsubfamilyBmember6(Fragment)OS=HomosapiensGN=DNAJB6PE=1SV=1;sp|O75190|DNJB6_HUMANDnaJhomologsubfamilyBmember6OS=HomosapiensGN=DNAJB6PE=1SV=2;tr|A0A0J9YX62|A0A0J9YX62_HUMANDnaJhomologsubfamilyBmember6OS=HomosapiensGN=DNAJB6PE=1SV=1;tr|C9JN01|C9JN01_HUMANDnaJhomologsubfamilyBmember6(Fragment)OS=HomosapiensGN=DNAJB6PE=1SV=1;tr|C9JB42|C9JB42_HUMANDnaJhomologsubfamilyBm…	tr|C9J2C4|C9J2C4_HUMANDnaJhomologsubfamilyBmember6(Fragment)OS=HomosapiensGN=DNAJB6PE=1SV=1;sp|O75190|DNJB6_HUMANDnaJhomologsubfamilyBmember6OS=HomosapiensGN=DNAJB6PE=1SV=2;tr|A0A0J9YX62|A0A0J9YX62_HUMANDnaJhomologsubfamilyBmember6OS=HomosapiensGN=DNAJB6PE=1SV=1;tr|C9JN01|C9JN01_HUMANDnaJhomologsubfamilyBmember6(Fragment)OS=HomosapiensGN=DNAJB6PE=1SV=1;tr|C9JB42|C9JB42_HUMANDnaJhomologsubfamilyBm…	3;3;3;2;2;2;2;2;2;2;1;1;1;1;1;1	3;3;3;2;2;2;2;2;2;2;1;1;1;1;1;1	3;3;3;2;2;2;2;2;2;2;1;1;1;1;1;1	;;;;;;;;;	16	3	3	3	1	2	1	1	0	1	1	0	1	0	1	0	0	1	0	0	0	0	0	0	0	1	2	1	1	0	1	1	0	1	0	1	0	0	1	0	0	0	0	0
tr|F8VWG6|F8VWG6_HUMANLiprin-alpha-2OS=HomosapiensGN=PPFIA2PE=1SV=1;tr|F8W1Y8|F8W1Y8_HUMANLiprin-alpha-2(Fragment)OS=HomosapiensGN=PPFIA2PE=1SV=1;tr|F8VYK7|F8VYK7_HUMANLiprin-alpha-2(Fragment)OS=HomosapiensGN=PPFIA2PE=1SV=1;tr|H0YHK3|H0YHK3_HUMANLiprin-alpha-2OS=HomosapiensGN=PPFIA2PE=1SV=2;tr|G3V200|G3V200_HUMANLiprin-alpha-2OS=HomosapiensGN=PPFIA2PE=1SV=2;sp|O75334|LIPA2_HUMANLiprin-alpha-2OS=H…	tr|F8VWG6|F8VWG6_HUMANLiprin-alpha-2OS=HomosapiensGN=PPFIA2PE=1SV=1;tr|F8W1Y8|F8W1Y8_HUMANLiprin-alpha-2(Fragment)OS=HomosapiensGN=PPFIA2PE=1SV=1;tr|F8VYK7|F8VYK7_HUMANLiprin-alpha-2(Fragment)OS=HomosapiensGN=PPFIA2PE=1SV=1;tr|H0YHK3|H0YHK3_HUMANLiprin-alpha-2OS=HomosapiensGN=PPFIA2PE=1SV=2;tr|G3V200|G3V200_HUMANLiprin-alpha-2OS=HomosapiensGN=PPFIA2PE=1SV=2;sp|O75334|LIPA2_HUMANLiprin-alpha-2OS=H…	1;1;1;1;1;1	1;1;1;1;1;1	1;1;1;1;1;1	;;;;;	6	1	1	1	0	0	0	0	0	0	0	0	0	0	0	0	0	0	0	1	0	1	1	0	0	0	0	0	0	0	0	0	0	0	0	0	0	0	0	0	1	0	1	1
tr|A0A024QZ42|A0A024QZ42_HUMANHCG1985580,isoformCRA_cOS=HomosapiensGN=PDCD6PE=1SV=1;sp|O75340|PDCD6_HUMANProgrammedcelldeathprotein6OS=HomosapiensGN=PDCD6PE=1SV=1	tr|A0A024QZ42|A0A024QZ42_HUMANHCG1985580,isoformCRA_cOS=HomosapiensGN=PDCD6PE=1SV=1;sp|O75340|PDCD6_HUMANProgrammedcelldeathprotein6OS=HomosapiensGN=PDCD6PE=1SV=1	1;1	1;1	1;1	;	2	1	1	1	0	0	1	0	0	1	0	0	0	0	0	0	0	0	0	1	0	0	0	0	0	0	0	1	0	0	1	0	0	0	0	0	0	0	0	0	1	0	0	0
sp|O75351|VPS4B_HUMANVacuolarproteinsorting-associatedprotein4BOS=HomosapiensGN=VPS4BPE=1SV=2;tr|I3L4J1|I3L4J1_HUMANUncharacterizedprotein(Fragment)OS=HomosapiensPE=1SV=3;sp|Q9UN37|VPS4A_HUMANVacuolarproteinsorting-associatedprotein4AOS=HomosapiensGN=VPS4APE=1SV=1;sp|Q6PIW4|FIGL1_HUMANFidgetin-likeprotein1OS=HomosapiensGN=FIGNL1PE=1SV=2	sp|O75351|VPS4B_HUMANVacuolarproteinsorting-associatedprotein4BOS=HomosapiensGN=VPS4BPE=1SV=2;tr|I3L4J1|I3L4J1_HUMANUncharacterizedprotein(Fragment)OS=HomosapiensPE=1SV=3;sp|Q9UN37|VPS4A_HUMANVacuolarproteinsorting-associatedprotein4AOS=HomosapiensGN=VPS4APE=1SV=1;sp|Q6PIW4|FIGL1_HUMANFidgetin-likeprotein1OS=HomosapiensGN=FIGNL1PE=1SV=2	2;1;1;1	2;1;1;1	2;1;1;1	;;;	4	2	2	2	1	1	1	1	0	1	0	0	1	0	1	1	0	2	0	0	0	1	1	0	0	1	1	1	1	0	1	0	0	1	0	1	1	0	2	0	0	0	1	1
sp|O75367|H2AY_HUMANCorehistonemacro-H2A.1OS=HomosapiensGN=H2AFYPE=1SV=4;tr|B4DJC3|B4DJC3_HUMANHistoneH2AOS=HomosapiensGN=H2AFYPE=1SV=1;tr|D6RCF2|D6RCF2_HUMANHistoneH2AOS=HomosapiensGN=H2AFYPE=1SV=1;tr|Q5SQT3|Q5SQT3_HUMANHistoneH2A(Fragment)OS=HomosapiensGN=H2AFY2PE=1SV=8;sp|Q9P0M6|H2AW_HUMANCorehistonemacro-H2A.2OS=HomosapiensGN=H2AFY2PE=1SV=3	sp|O75367|H2AY_HUMANCorehistonemacro-H2A.1OS=HomosapiensGN=H2AFYPE=1SV=4;tr|B4DJC3|B4DJC3_HUMANHistoneH2AOS=HomosapiensGN=H2AFYPE=1SV=1	5;3;2;1;1	5;3;2;1;1	5;3;2;1;1	;	5	5	5	5	3	3	3	2	0	3	3	0	3	3	2	1	0	1	0	1	1	0	0	0	0	3	3	3	2	0	3	3	0	3	3	2	1	0	1	0	1	1	0	0
sp|O75369|FLNB_HUMANFilamin-BOS=HomosapiensGN=FLNBPE=1SV=2;tr|E7EN95|E7EN95_HUMANFilamin-BOS=HomosapiensGN=FLNBPE=1SV=1	sp|O75369|FLNB_HUMANFilamin-BOS=HomosapiensGN=FLNBPE=1SV=2;tr|E7EN95|E7EN95_HUMANFilamin-BOS=HomosapiensGN=FLNBPE=1SV=1	12;7	7;7	7;7	;	2	12	7	7	3	2	3	2	2	7	3	0	4	2	3	2	1	4	2	4	1	0	0	0	1	1	2	1	1	0	3	1	0	2	0	1	0	0	1	0	3	0	0	0
tr|F8W642|F8W642_HUMANCitratesynthase,mitochondrial(Fragment)OS=HomosapiensGN=CSPE=1SV=1;tr|F8VZK9|F8VZK9_HUMANCitratesynthase,mitochondrial(Fragment)OS=HomosapiensGN=CSPE=1SV=8;tr|F8VX07|F8VX07_HUMANCitratesynthase,mitochondrial(Fragment)OS=HomosapiensGN=CSPE=1SV=1;tr|F8VRP1|F8VRP1_HUMANCitratesynthase,mitochondrial(Fragment)OS=HomosapiensGN=CSPE=1SV=8;tr|F8VX68|F8VX68_HUMANCitratesynthase,mitoc…	tr|F8W642|F8W642_HUMANCitratesynthase,mitochondrial(Fragment)OS=HomosapiensGN=CSPE=1SV=1;tr|F8VZK9|F8VZK9_HUMANCitratesynthase,mitochondrial(Fragment)OS=HomosapiensGN=CSPE=1SV=8;tr|F8VX07|F8VX07_HUMANCitratesynthase,mitochondrial(Fragment)OS=HomosapiensGN=CSPE=1SV=1;tr|F8VRP1|F8VRP1_HUMANCitratesynthase,mitochondrial(Fragment)OS=HomosapiensGN=CSPE=1SV=8;tr|F8VX68|F8VX68_HUMANCitratesynthase,mitoc…	1;1;1;1;1;1;1;1;1;1;1;1;1;1	1;1;1;1;1;1;1;1;1;1;1;1;1;1	1;1;1;1;1;1;1;1;1;1;1;1;1;1	;;;;;;;;;;;;;	14	1	1	1	0	0	0	0	0	0	0	0	1	0	1	1	0	1	0	0	0	0	0	0	0	0	0	0	0	0	0	0	0	1	0	1	1	0	1	0	0	0	0	0
tr|B0QZ43|B0QZ43_HUMANErlin-1(Fragment)OS=HomosapiensGN=ERLIN1PE=1SV=1;tr|E5RHW4|E5RHW4_HUMANErlin-2(Fragment)OS=HomosapiensGN=ERLIN2PE=1SV=1;sp|O94905|ERLN2_HUMANErlin-2OS=HomosapiensGN=ERLIN2PE=1SV=1;sp|O75477|ERLN1_HUMANErlin-1OS=HomosapiensGN=ERLIN1PE=1SV=1	tr|B0QZ43|B0QZ43_HUMANErlin-1(Fragment)OS=HomosapiensGN=ERLIN1PE=1SV=1;tr|E5RHW4|E5RHW4_HUMANErlin-2(Fragment)OS=HomosapiensGN=ERLIN2PE=1SV=1;sp|O94905|ERLN2_HUMANErlin-2OS=HomosapiensGN=ERLIN2PE=1SV=1;sp|O75477|ERLN1_HUMANErlin-1OS=HomosapiensGN=ERLIN1PE=1SV=1	1;1;1;1	1;1;1;1	1;1;1;1	;;;	4	1	1	1	0	0	0	0	0	0	0	0	0	0	1	1	0	1	0	0	0	0	0	0	0	0	0	0	0	0	0	0	0	0	0	1	1	0	1	0	0	0	0	0
sp|O75531|BAF_HUMANBarrier-to-autointegrationfactorOS=HomosapiensGN=BANF1PE=1SV=1	sp|O75531|BAF_HUMANBarrier-to-autointegrationfactorOS=HomosapiensGN=BANF1PE=1SV=1	4	4	4		1	4	4	4	2	1	2	2	1	0	0	0	1	0	0	0	0	1	0	2	1	0	0	2	0	2	1	2	2	1	0	0	0	1	0	0	0	0	1	0	2	1	0	0
sp|O75556|SG2A1_HUMANMammaglobin-BOS=HomosapiensGN=SCGB2A1PE=1SV=1	sp|O75556|SG2A1_HUMANMammaglobin-BOS=HomosapiensGN=SCGB2A1PE=1SV=1	2	2	2		1	2	2	2	0	1	0	0	0	2	1	0	0	0	0	0	0	0	0	0	0	1	1	1	0	0	1	0	0	0	2	1	0	0	0	0	0	0	0	0	0	0	1	1
sp|O75602|SPAG6_HUMANSperm-associatedantigen6OS=HomosapiensGN=SPAG6PE=2SV=1;tr|A0A0A0MT17|A0A0A0MT17_HUMANSperm-associatedantigen6(Fragment)OS=HomosapiensGN=SPAG6PE=1SV=1;tr|A0A0A0MSY0|A0A0A0MSY0_HUMANSperm-associatedantigen6(Fragment)OS=HomosapiensGN=SPAG6PE=1SV=1;tr|A0A0A0MRT8|A0A0A0MRT8_HUMANSperm-associatedantigen6OS=HomosapiensGN=SPAG6PE=1SV=1	sp|O75602|SPAG6_HUMANSperm-associatedantigen6OS=HomosapiensGN=SPAG6PE=2SV=1;tr|A0A0A0MT17|A0A0A0MT17_HUMANSperm-associatedantigen6(Fragment)OS=HomosapiensGN=SPAG6PE=1SV=1;tr|A0A0A0MSY0|A0A0A0MSY0_HUMANSperm-associatedantigen6(Fragment)OS=HomosapiensGN=SPAG6PE=1SV=1;tr|A0A0A0MRT8|A0A0A0MRT8_HUMANSperm-associatedantigen6OS=HomosapiensGN=SPAG6PE=1SV=1	2;1;1;1	2;1;1;1	2;1;1;1	;;;	4	2	2	2	0	0	1	1	0	2	0	0	2	0	0	0	0	0	0	0	0	1	1	0	0	0	0	1	1	0	2	0	0	2	0	0	0	0	0	0	0	0	1	1
tr|A0A087X1K9|A0A087X1K9_HUMANAcyl-proteinthioesterase1OS=HomosapiensGN=LYPLA1PE=1SV=1;tr|B4DP64|B4DP64_HUMANAcyl-proteinthioesterase1OS=HomosapiensGN=LYPLA1PE=1SV=1;tr|E5RGR0|E5RGR0_HUMANAcyl-proteinthioesterase1(Fragment)OS=HomosapiensGN=LYPLA1PE=1SV=1;sp|O75608|LYPA1_HUMANAcyl-proteinthioesterase1OS=HomosapiensGN=LYPLA1PE=1SV=1	tr|A0A087X1K9|A0A087X1K9_HUMANAcyl-proteinthioesterase1OS=HomosapiensGN=LYPLA1PE=1SV=1;tr|B4DP64|B4DP64_HUMANAcyl-proteinthioesterase1OS=HomosapiensGN=LYPLA1PE=1SV=1;tr|E5RGR0|E5RGR0_HUMANAcyl-proteinthioesterase1(Fragment)OS=HomosapiensGN=LYPLA1PE=1SV=1;sp|O75608|LYPA1_HUMANAcyl-proteinthioesterase1OS=HomosapiensGN=LYPLA1PE=1SV=1	1;1;1;1	1;1;1;1	1;1;1;1	;;;	4	1	1	1	0	0	0	0	0	1	0	0	1	1	0	1	0	1	0	0	0	0	0	0	0	0	0	0	0	0	1	0	0	1	1	0	1	0	1	0	0	0	0	0
sp|O75636|FCN3_HUMANFicolin-3OS=HomosapiensGN=FCN3PE=1SV=2	sp|O75636|FCN3_HUMANFicolin-3OS=HomosapiensGN=FCN3PE=1SV=2	4	4	4		1	4	4	4	0	1	0	0	0	0	0	0	1	0	0	0	3	1	0	0	1	0	1	0	0	0	1	0	0	0	0	0	0	1	0	0	0	3	1	0	0	1	0	1
sp|O75800|ZMY10_HUMANZincfingerMYNDdomain-containingprotein10OS=HomosapiensGN=ZMYND10PE=1SV=2	sp|O75800|ZMY10_HUMANZincfingerMYNDdomain-containingprotein10OS=HomosapiensGN=ZMYND10PE=1SV=2	1	1	1		1	1	1	1	1	0	0	0	0	0	0	0	0	0	1	1	0	1	0	0	0	0	0	0	0	1	0	0	0	0	0	0	0	0	0	1	1	0	1	0	0	0	0	0
sp|O75828|CBR3_HUMANCarbonylreductase[NADPH]3OS=HomosapiensGN=CBR3PE=1SV=3	sp|O75828|CBR3_HUMANCarbonylreductase[NADPH]3OS=HomosapiensGN=CBR3PE=1SV=3	4	1	1		1	4	1	1	2	1	3	4	1	4	4	0	4	4	0	3	0	3	0	1	0	0	0	0	0	1	0	1	1	0	1	1	0	1	1	0	1	0	1	0	0	0	0	0
sp|O75874|IDHC_HUMANIsocitratedehydrogenase[NADP]cytoplasmicOS=HomosapiensGN=IDH1PE=1SV=2;tr|C9J4N6|C9J4N6_HUMANIsocitratedehydrogenase[NADP]cytoplasmic(Fragment)OS=HomosapiensGN=IDH1PE=1SV=1	sp|O75874|IDHC_HUMANIsocitratedehydrogenase[NADP]cytoplasmicOS=HomosapiensGN=IDH1PE=1SV=2;tr|C9J4N6|C9J4N6_HUMANIsocitratedehydrogenase[NADP]cytoplasmic(Fragment)OS=HomosapiensGN=IDH1PE=1SV=1	5;3	5;3	4;2	;	2	5	5	4	2	0	0	1	0	2	1	0	3	0	0	2	0	2	0	0	0	0	0	0	1	2	0	0	1	0	2	1	0	3	0	0	2	0	2	0	0	0	0	0
sp|O75882|ATRN_HUMANAttractinOS=HomosapiensGN=ATRNPE=1SV=2	sp|O75882|ATRN_HUMANAttractinOS=HomosapiensGN=ATRNPE=1SV=2	2	2	2		1	2	2	2	0	0	0	0	0	0	0	0	0	0	0	0	2	0	0	0	0	0	0	0	0	0	0	0	0	0	0	0	0	0	0	0	0	2	0	0	0	0	0	0
sp|O75884|RBBP9_HUMANPutativehydrolaseRBBP9OS=HomosapiensGN=RBBP9PE=1SV=2	sp|O75884|RBBP9_HUMANPutativehydrolaseRBBP9OS=HomosapiensGN=RBBP9PE=1SV=2	1	1	1		1	1	1	1	0	0	0	0	0	0	0	0	0	0	0	1	0	1	0	0	0	0	0	1	0	0	0	0	0	0	0	0	0	0	0	0	1	0	1	0	0	0	0	0
tr|F8WF90|F8WF90_HUMANPRA1familyproteinOS=HomosapiensGN=ARL6IP5PE=1SV=1;tr|C9JQU6|C9JQU6_HUMANPRA1familyproteinOS=HomosapiensGN=ARL6IP5PE=1SV=1;tr|F8WF33|F8WF33_HUMANPRA1familyproteinOS=HomosapiensGN=ARL6IP5PE=1SV=1;sp|O75915|PRAF3_HUMANPRA1familyprotein3OS=HomosapiensGN=ARL6IP5PE=1SV=1	tr|F8WF90|F8WF90_HUMANPRA1familyproteinOS=HomosapiensGN=ARL6IP5PE=1SV=1;tr|C9JQU6|C9JQU6_HUMANPRA1familyproteinOS=HomosapiensGN=ARL6IP5PE=1SV=1;tr|F8WF33|F8WF33_HUMANPRA1familyproteinOS=HomosapiensGN=ARL6IP5PE=1SV=1;sp|O75915|PRAF3_HUMANPRA1familyprotein3OS=HomosapiensGN=ARL6IP5PE=1SV=1	2;2;2;2	2;2;2;2	2;2;2;2	;;;	4	2	2	2	0	0	0	0	0	0	0	0	0	0	0	1	2	2	0	0	0	0	0	1	0	0	0	0	0	0	0	0	0	0	0	0	1	2	2	0	0	0	0	0
sp|O75923|DYSF_HUMANDysferlinOS=HomosapiensGN=DYSFPE=1SV=1	sp|O75923|DYSF_HUMANDysferlinOS=HomosapiensGN=DYSFPE=1SV=1	2	2	2		1	2	2	2	0	1	0	0	0	0	0	0	0	0	1	1	0	1	1	0	0	0	1	1	1	0	1	0	0	0	0	0	0	0	0	1	1	0	1	1	0	0	0	1
sp|O75947|ATP5H_HUMANATPsynthasesubunitd,mitochondrialOS=HomosapiensGN=ATP5HPE=1SV=3	sp|O75947|ATP5H_HUMANATPsynthasesubunitd,mitochondrialOS=HomosapiensGN=ATP5HPE=1SV=3	2	2	2		1	2	2	2	0	0	0	0	0	0	0	0	0	0	1	0	0	2	1	0	0	0	0	0	0	0	0	0	0	0	0	0	0	0	0	1	0	0	2	1	0	0	0	0
tr|A0A140T9B1|A0A140T9B1_HUMANFlotillin-1(Fragment)OS=HomosapiensGN=FLOT1PE=1SV=1;tr|A0A140T957|A0A140T957_HUMANFlotillin-1(Fragment)OS=HomosapiensGN=FLOT1PE=1SV=1;tr|A0A140T910|A0A140T910_HUMANFlotillin-1(Fragment)OS=HomosapiensGN=FLOT1PE=1SV=1;tr|A0A140T9C3|A0A140T9C3_HUMANFlotillin-1(Fragment)OS=HomosapiensGN=FLOT1PE=1SV=1;tr|A0A140T959|A0A140T959_HUMANFlotillin-1(Fragment)OS=HomosapiensGN=FLO…	tr|A0A140T9B1|A0A140T9B1_HUMANFlotillin-1(Fragment)OS=HomosapiensGN=FLOT1PE=1SV=1;tr|A0A140T957|A0A140T957_HUMANFlotillin-1(Fragment)OS=HomosapiensGN=FLOT1PE=1SV=1;tr|A0A140T910|A0A140T910_HUMANFlotillin-1(Fragment)OS=HomosapiensGN=FLOT1PE=1SV=1;tr|A0A140T9C3|A0A140T9C3_HUMANFlotillin-1(Fragment)OS=HomosapiensGN=FLOT1PE=1SV=1;tr|A0A140T959|A0A140T959_HUMANFlotillin-1(Fragment)OS=HomosapiensGN=FLO…	1;1;1;1;1;1;1;1;1;1;1;1;1;1	1;1;1;1;1;1;1;1;1;1;1;1;1;1	1;1;1;1;1;1;1;1;1;1;1;1;1;1	;;;;;;;;;;;;;	14	1	1	1	1	1	0	1	1	1	1	0	0	0	1	1	1	1	0	1	0	0	0	0	0	1	1	0	1	1	1	1	0	0	0	1	1	1	1	0	1	0	0	0
tr|E9PN17|E9PN17_HUMANATPsynthasesubunitg,mitochondrialOS=HomosapiensGN=ATP5LPE=1SV=1;sp|O75964|ATP5L_HUMANATPsynthasesubunitg,mitochondrialOS=HomosapiensGN=ATP5LPE=1SV=3	tr|E9PN17|E9PN17_HUMANATPsynthasesubunitg,mitochondrialOS=HomosapiensGN=ATP5LPE=1SV=1;sp|O75964|ATP5L_HUMANATPsynthasesubunitg,mitochondrialOS=HomosapiensGN=ATP5LPE=1SV=3	3;3	3;3	3;3	;	2	3	3	3	0	0	1	0	0	2	0	0	1	0	2	2	0	3	0	1	0	0	0	1	0	0	0	1	0	0	2	0	0	1	0	2	2	0	3	0	1	0	0	0
tr|C9JM66|C9JM66_HUMANF-BARanddoubleSH3domainsprotein2(Fragment)OS=HomosapiensGN=FCHSD2PE=1SV=1;sp|O94868|FCSD2_HUMANF-BARanddoubleSH3domainsprotein2OS=HomosapiensGN=FCHSD2PE=1SV=3;tr|E9PG19|E9PG19_HUMANF-BARanddoubleSH3domainsprotein2OS=HomosapiensGN=FCHSD2PE=1SV=1	tr|C9JM66|C9JM66_HUMANF-BARanddoubleSH3domainsprotein2(Fragment)OS=HomosapiensGN=FCHSD2PE=1SV=1;sp|O94868|FCSD2_HUMANF-BARanddoubleSH3domainsprotein2OS=HomosapiensGN=FCHSD2PE=1SV=3;tr|E9PG19|E9PG19_HUMANF-BARanddoubleSH3domainsprotein2OS=HomosapiensGN=FCHSD2PE=1SV=1	1;1;1	1;1;1	1;1;1	;;	3	1	1	1	0	0	0	0	0	0	0	0	0	0	0	0	0	0	0	0	0	1	1	1	0	0	0	0	0	0	0	0	0	0	0	0	0	0	0	0	0	0	1	1
tr|H0YAB3|H0YAB3_HUMANProteintransportproteinSec31A(Fragment)OS=HomosapiensGN=SEC31APE=1SV=1;tr|D6RHZ5|D6RHZ5_HUMANProteintransportproteinSec31AOS=HomosapiensGN=SEC31APE=1SV=1;tr|H7BXG7|H7BXG7_HUMANProteintransportproteinSec31AOS=HomosapiensGN=SEC31APE=1SV=1;sp|O94979|SC31A_HUMANProteintransportproteinSec31AOS=HomosapiensGN=SEC31APE=1SV=3;tr|D6REX3|D6REX3_HUMANProteintransportproteinSec31AOS=Homo…	tr|H0YAB3|H0YAB3_HUMANProteintransportproteinSec31A(Fragment)OS=HomosapiensGN=SEC31APE=1SV=1;tr|D6RHZ5|D6RHZ5_HUMANProteintransportproteinSec31AOS=HomosapiensGN=SEC31APE=1SV=1;tr|H7BXG7|H7BXG7_HUMANProteintransportproteinSec31AOS=HomosapiensGN=SEC31APE=1SV=1;sp|O94979|SC31A_HUMANProteintransportproteinSec31AOS=HomosapiensGN=SEC31APE=1SV=3;tr|D6REX3|D6REX3_HUMANProteintransportproteinSec31AOS=Homo…	1;1;1;1;1	1;1;1;1;1	1;1;1;1;1	;;;;	5	1	1	1	0	0	0	0	0	1	0	0	1	0	0	0	0	0	0	0	0	0	0	0	0	0	0	0	0	0	1	0	0	1	0	0	0	0	0	0	0	0	0	0
tr|M0R261|M0R261_HUMAN6-phosphogluconolactonase(Fragment)OS=HomosapiensGN=PGLSPE=1SV=1;sp|O95336|6PGL_HUMAN6-phosphogluconolactonaseOS=HomosapiensGN=PGLSPE=1SV=2;tr|M0R0U3|M0R0U3_HUMAN6-phosphogluconolactonaseOS=HomosapiensGN=PGLSPE=1SV=1;tr|M0R1L2|M0R1L2_HUMAN6-phosphogluconolactonase(Fragment)OS=HomosapiensGN=PGLSPE=1SV=1	tr|M0R261|M0R261_HUMAN6-phosphogluconolactonase(Fragment)OS=HomosapiensGN=PGLSPE=1SV=1;sp|O95336|6PGL_HUMAN6-phosphogluconolactonaseOS=HomosapiensGN=PGLSPE=1SV=2;tr|M0R0U3|M0R0U3_HUMAN6-phosphogluconolactonaseOS=HomosapiensGN=PGLSPE=1SV=1	7;7;4;2	7;7;4;2	7;7;4;2	;;	4	7	7	7	1	1	0	1	1	5	5	0	4	1	1	1	0	2	0	0	0	0	0	0	0	1	1	0	1	1	5	5	0	4	1	1	1	0	2	0	0	0	0	0
sp|O95433|AHSA1_HUMANActivatorof90kDaheatshockproteinATPasehomolog1OS=HomosapiensGN=AHSA1PE=1SV=1;tr|H0YJ63|H0YJ63_HUMANActivatorof90kDaheatshockproteinATPasehomolog1(Fragment)OS=HomosapiensGN=AHSA1PE=1SV=1;tr|G3V438|G3V438_HUMANActivatorof90kDaheatshockproteinATPasehomolog1(Fragment)OS=HomosapiensGN=AHSA1PE=1SV=1;tr|H0YJG7|H0YJG7_HUMANActivatorof90kDaheatshockproteinATPasehomolog1(Fragment)OS=Ho…	sp|O95433|AHSA1_HUMANActivatorof90kDaheatshockproteinATPasehomolog1OS=HomosapiensGN=AHSA1PE=1SV=1;tr|H0YJ63|H0YJ63_HUMANActivatorof90kDaheatshockproteinATPasehomolog1(Fragment)OS=HomosapiensGN=AHSA1PE=1SV=1;tr|G3V438|G3V438_HUMANActivatorof90kDaheatshockproteinATPasehomolog1(Fragment)OS=HomosapiensGN=AHSA1PE=1SV=1;tr|H0YJG7|H0YJG7_HUMANActivatorof90kDaheatshockproteinATPasehomolog1(Fragment)OS=Ho…	3;2;2;2;1	3;2;2;2;1	3;2;2;2;1	;;;	5	3	3	3	1	0	1	0	0	2	1	0	3	0	0	0	0	0	0	0	0	0	0	0	0	1	0	1	0	0	2	1	0	3	0	0	0	0	0	0	0	0	0	0
sp|O95436|NPT2B_HUMANSodium-dependentphosphatetransportprotein2BOS=HomosapiensGN=SLC34A2PE=1SV=3;tr|D6RBC0|D6RBC0_HUMANSodium-dependentphosphatetransportprotein2B(Fragment)OS=HomosapiensGN=SLC34A2PE=1SV=1;tr|D6RA94|D6RA94_HUMANSodium-dependentphosphatetransportprotein2B(Fragment)OS=HomosapiensGN=SLC34A2PE=1SV=1	sp|O95436|NPT2B_HUMANSodium-dependentphosphatetransportprotein2BOS=HomosapiensGN=SLC34A2PE=1SV=3	9;1;1	9;1;1	9;1;1		3	9	9	9	6	7	6	6	3	2	1	0	3	2	3	4	1	5	0	5	2	1	0	4	0	6	7	6	6	3	2	1	0	3	2	3	4	1	5	0	5	2	1	0
tr|E9PK31|E9PK31_HUMANVascularnon-inflammatorymolecule2(Fragment)OS=HomosapiensGN=VNN2PE=1SV=1;tr|E9PRD9|E9PRD9_HUMANVascularnon-inflammatorymolecule2(Fragment)OS=HomosapiensGN=VNN2PE=1SV=1;tr|E9PLK5|E9PLK5_HUMANVascularnon-inflammatorymolecule2OS=HomosapiensGN=VNN2PE=1SV=1;tr|E9PQ75|E9PQ75_HUMANVascularnon-inflammatorymolecule2OS=HomosapiensGN=VNN2PE=1SV=1;tr|E9PL76|E9PL76_HUMANVascularnon-infla…	tr|E9PK31|E9PK31_HUMANVascularnon-inflammatorymolecule2(Fragment)OS=HomosapiensGN=VNN2PE=1SV=1;tr|E9PRD9|E9PRD9_HUMANVascularnon-inflammatorymolecule2(Fragment)OS=HomosapiensGN=VNN2PE=1SV=1;tr|E9PLK5|E9PLK5_HUMANVascularnon-inflammatorymolecule2OS=HomosapiensGN=VNN2PE=1SV=1;tr|E9PQ75|E9PQ75_HUMANVascularnon-inflammatorymolecule2OS=HomosapiensGN=VNN2PE=1SV=1;tr|E9PL76|E9PL76_HUMANVascularnon-infla…	1;1;1;1;1;1;1;1;1;1	1;1;1;1;1;1;1;1;1;1	1;1;1;1;1;1;1;1;1;1	;;;;;;;;;	10	1	1	1	0	0	0	0	0	0	0	0	0	0	0	0	0	0	0	0	0	1	1	1	0	0	0	0	0	0	0	0	0	0	0	0	0	0	0	0	0	0	1	1
tr|B9ZVN9|B9ZVN9_HUMANDNA-directedRNApolymerasesubunitOS=HomosapiensGN=POLR1APE=1SV=1;sp|O95602|RPA1_HUMANDNA-directedRNApolymeraseIsubunitRPA1OS=HomosapiensGN=POLR1APE=1SV=2	tr|B9ZVN9|B9ZVN9_HUMANDNA-directedRNApolymerasesubunitOS=HomosapiensGN=POLR1APE=1SV=1;sp|O95602|RPA1_HUMANDNA-directedRNApolymeraseIsubunitRPA1OS=HomosapiensGN=POLR1APE=1SV=2	1;1	1;1	1;1	;	2	1	1	1	0	0	0	0	0	0	0	0	0	0	0	0	1	0	0	0	0	0	0	0	0	0	0	0	0	0	0	0	0	0	0	0	0	1	0	0	0	0	0	0
sp|O95716|RAB3D_HUMANRas-relatedproteinRab-3DOS=HomosapiensGN=RAB3DPE=1SV=1;tr|M0R257|M0R257_HUMANRas-relatedproteinRab-3A(Fragment)OS=HomosapiensGN=RAB3APE=1SV=1;sp|P20337|RAB3B_HUMANRas-relatedproteinRab-3BOS=HomosapiensGN=RAB3BPE=1SV=2;sp|P20336|RAB3A_HUMANRas-relatedproteinRab-3AOS=HomosapiensGN=RAB3APE=1SV=1;sp|Q96E17|RAB3C_HUMANRas-relatedproteinRab-3COS=HomosapiensGN=RAB3CPE=2SV=1	sp|O95716|RAB3D_HUMANRas-relatedproteinRab-3DOS=HomosapiensGN=RAB3DPE=1SV=1	3;1;1;1;1	2;0;0;0;0	2;0;0;0;0		5	3	2	2	1	0	2	1	0	2	0	0	2	0	2	2	0	2	0	0	0	0	0	0	0	0	0	1	1	0	1	0	0	1	0	1	2	0	2	0	0	0	0	0
sp|O95782|AP2A1_HUMANAP-2complexsubunitalpha-1OS=HomosapiensGN=AP2A1PE=1SV=3	sp|O95782|AP2A1_HUMANAP-2complexsubunitalpha-1OS=HomosapiensGN=AP2A1PE=1SV=3	1	1	1		1	1	1	1	0	0	0	0	0	1	0	0	1	0	0	0	0	0	1	0	0	0	0	0	0	0	0	0	0	0	1	0	0	1	0	0	0	0	0	1	0	0	0	0
sp|O95833|CLIC3_HUMANChlorideintracellularchannelprotein3OS=HomosapiensGN=CLIC3PE=1SV=2	sp|O95833|CLIC3_HUMANChlorideintracellularchannelprotein3OS=HomosapiensGN=CLIC3PE=1SV=2	1	1	1		1	1	1	1	1	0	1	0	0	0	0	0	0	0	1	1	0	1	0	0	0	0	0	0	0	1	0	1	0	0	0	0	0	0	0	1	1	0	1	0	0	0	0	0
tr|K7EII6|K7EII6_HUMANEchinodermmicrotubule-associatedprotein-like2(Fragment)OS=HomosapiensGN=EML2PE=1SV=1;tr|K7EKG3|K7EKG3_HUMANEchinodermmicrotubule-associatedprotein-like2(Fragment)OS=HomosapiensGN=EML2PE=1SV=1;tr|A0A0C4DGQ7|A0A0C4DGQ7_HUMANEchinodermmicrotubule-associatedprotein-like2OS=HomosapiensGN=EML2PE=1SV=1;tr|C9JRL6|C9JRL6_HUMANEchinodermmicrotubule-associatedprotein-like2OS=Homosapien…	tr|K7EII6|K7EII6_HUMANEchinodermmicrotubule-associatedprotein-like2(Fragment)OS=HomosapiensGN=EML2PE=1SV=1;tr|K7EKG3|K7EKG3_HUMANEchinodermmicrotubule-associatedprotein-like2(Fragment)OS=HomosapiensGN=EML2PE=1SV=1;tr|A0A0C4DGQ7|A0A0C4DGQ7_HUMANEchinodermmicrotubule-associatedprotein-like2OS=HomosapiensGN=EML2PE=1SV=1;tr|C9JRL6|C9JRL6_HUMANEchinodermmicrotubule-associatedprotein-like2OS=Homosapien…	1;1;1;1;1;1	1;1;1;1;1;1	1;1;1;1;1;1	;;;;;	6	1	1	1	0	0	0	0	0	1	0	0	1	0	0	1	0	1	0	0	0	0	0	0	0	0	0	0	0	0	1	0	0	1	0	0	1	0	1	0	0	0	0	0
sp|O95861|BPNT1_HUMAN3'(2'),5'-bisphosphatenucleotidase1OS=HomosapiensGN=BPNT1PE=1SV=1;tr|A6NF51|A6NF51_HUMAN3'(2'),5'-bisphosphatenucleotidase1OS=HomosapiensGN=BPNT1PE=1SV=2;tr|F8VVW8|F8VVW8_HUMAN3'(2'),5'-bisphosphatenucleotidase1(Fragment)OS=HomosapiensGN=BPNT1PE=1SV=2;tr|F8VZG4|F8VZG4_HUMAN3'(2'),5'-bisphosphatenucleotidase1(Fragment)OS=HomosapiensGN=BPNT1PE=1SV=1;tr|F8W1J0|F8W1J0_HUMAN3'(2')…	sp|O95861|BPNT1_HUMAN3'(2'),5'-bisphosphatenucleotidase1OS=HomosapiensGN=BPNT1PE=1SV=1;tr|A6NF51|A6NF51_HUMAN3'(2'),5'-bisphosphatenucleotidase1OS=HomosapiensGN=BPNT1PE=1SV=2	3;2;1;1;1	3;2;1;1;1	3;2;1;1;1	;	5	3	3	3	0	0	0	0	0	2	0	0	2	0	0	0	0	0	0	1	0	0	0	0	0	0	0	0	0	0	2	0	0	2	0	0	0	0	0	0	1	0	0	0
sp|O95865|DDAH2_HUMANN(G),N(G)-dimethylargininedimethylaminohydrolase2OS=HomosapiensGN=DDAH2PE=1SV=1	sp|O95865|DDAH2_HUMANN(G),N(G)-dimethylargininedimethylaminohydrolase2OS=HomosapiensGN=DDAH2PE=1SV=1	1	1	1		1	1	1	1	0	0	0	0	0	0	0	0	0	0	1	1	0	1	0	0	0	0	0	0	0	0	0	0	0	0	0	0	0	0	0	1	1	0	1	0	0	0	0	0
sp|O95994|AGR2_HUMANAnteriorgradientprotein2homologOS=HomosapiensGN=AGR2PE=1SV=1;tr|C9J3E2|C9J3E2_HUMANAnteriorgradientprotein2homolog(Fragment)OS=HomosapiensGN=AGR2PE=1SV=1;tr|B5MC07|B5MC07_HUMANAnteriorgradientprotein2homologOS=HomosapiensGN=AGR2PE=1SV=1;tr|H7C3Z9|H7C3Z9_HUMANAnteriorgradientprotein2homolog(Fragment)OS=HomosapiensGN=AGR2PE=1SV=1	sp|O95994|AGR2_HUMANAnteriorgradientprotein2homologOS=HomosapiensGN=AGR2PE=1SV=1;tr|C9J3E2|C9J3E2_HUMANAnteriorgradientprotein2homolog(Fragment)OS=HomosapiensGN=AGR2PE=1SV=1;tr|B5MC07|B5MC07_HUMANAnteriorgradientprotein2homologOS=HomosapiensGN=AGR2PE=1SV=1	3;2;2;1	3;2;2;1	3;2;2;1	;;	4	3	3	3	0	0	0	0	0	2	0	0	2	0	0	1	0	1	0	1	1	0	0	1	1	0	0	0	0	0	2	0	0	2	0	0	1	0	1	0	1	1	0	0
sp|O96009|NAPSA_HUMANNapsin-AOS=HomosapiensGN=NAPSAPE=1SV=1;tr|M0QXC5|M0QXC5_HUMANNapsin-A(Fragment)OS=HomosapiensGN=NAPSAPE=1SV=1;tr|A0A0B4J2A8|A0A0B4J2A8_HUMANNapsin-AOS=HomosapiensGN=NAPSAPE=1SV=1	sp|O96009|NAPSA_HUMANNapsin-AOS=HomosapiensGN=NAPSAPE=1SV=1;tr|M0QXC5|M0QXC5_HUMANNapsin-A(Fragment)OS=HomosapiensGN=NAPSAPE=1SV=1	8;6;1	8;6;1	8;6;1	;	3	8	8	8	3	3	4	4	2	4	3	0	5	4	3	3	4	4	0	5	4	0	0	0	1	3	3	4	4	2	4	3	0	5	4	3	3	4	4	0	5	4	0	0
sp|P00167|CYB5_HUMANCytochromeb5OS=HomosapiensGN=CYB5APE=1SV=2	sp|P00167|CYB5_HUMANCytochromeb5OS=HomosapiensGN=CYB5APE=1SV=2	2	2	2		1	2	2	2	0	0	1	0	0	1	1	0	1	0	1	0	1	2	0	1	0	0	0	1	0	0	0	1	0	0	1	1	0	1	0	1	0	1	2	0	1	0	0	0
tr|D6RHZ6|D6RHZ6_HUMANAlcoholdehydrogenase1BOS=HomosapiensGN=ADH1BPE=1SV=2;tr|V9HW50|V9HW50_HUMANAlcoholdehydrogenase1BOS=HomosapiensGN=HEL-S-117PE=1SV=1;sp|P07327|ADH1A_HUMANAlcoholdehydrogenase1AOS=HomosapiensGN=ADH1APE=1SV=2;sp|P00326|ADH1G_HUMANAlcoholdehydrogenase1COS=HomosapiensGN=ADH1CPE=1SV=2;sp|P00325|ADH1B_HUMANAlcoholdehydrogenase1BOS=HomosapiensGN=ADH1BPE=1SV=2	tr|D6RHZ6|D6RHZ6_HUMANAlcoholdehydrogenase1BOS=HomosapiensGN=ADH1BPE=1SV=2;tr|V9HW50|V9HW50_HUMANAlcoholdehydrogenase1BOS=HomosapiensGN=HEL-S-117PE=1SV=1;sp|P07327|ADH1A_HUMANAlcoholdehydrogenase1AOS=HomosapiensGN=ADH1APE=1SV=2;sp|P00326|ADH1G_HUMANAlcoholdehydrogenase1COS=HomosapiensGN=ADH1CPE=1SV=2;sp|P00325|ADH1B_HUMANAlcoholdehydrogenase1BOS=HomosapiensGN=ADH1BPE=1SV=2	1;1;1;1;1	1;1;1;1;1	1;1;1;1;1	;;;;	5	1	1	1	0	0	0	0	0	0	0	0	0	0	1	1	0	1	0	0	0	0	0	0	0	0	0	0	0	0	0	0	0	0	0	1	1	0	1	0	0	0	0	0
sp|P00338|LDHA_HUMANL-lactatedehydrogenaseAchainOS=HomosapiensGN=LDHAPE=1SV=2;tr|F5GYU2|F5GYU2_HUMANL-lactatedehydrogenaseAchain(Fragment)OS=HomosapiensGN=LDHAPE=1SV=1;tr|F5GXY2|F5GXY2_HUMANL-lactatedehydrogenaseAchain(Fragment)OS=HomosapiensGN=LDHAPE=1SV=8;tr|F5GXH2|F5GXH2_HUMANL-lactatedehydrogenaseAchain(Fragment)OS=HomosapiensGN=LDHAPE=1SV=1;tr|F5H5J4|F5H5J4_HUMANL-lactatedehydrogenaseAchainO…	sp|P00338|LDHA_HUMANL-lactatedehydrogenaseAchainOS=HomosapiensGN=LDHAPE=1SV=2	22;10;10;9;5;5;3;3;3;3;3;2;2	22;10;10;9;5;5;3;3;3;3;3;2;2	20;9;9;8;5;5;3;3;3;3;3;1;1		13	22	22	20	13	10	11	12	8	17	9	2	17	7	5	7	5	8	2	9	3	3	1	3	1	13	10	11	12	8	17	9	2	17	7	5	7	5	8	2	9	3	3	1
sp|P00352|AL1A1_HUMANRetinaldehydrogenase1OS=HomosapiensGN=ALDH1A1PE=1SV=2;tr|Q5SYQ7|Q5SYQ7_HUMANRetinaldehydrogenase1(Fragment)OS=HomosapiensGN=ALDH1A1PE=1SV=1;tr|Q5SYQ9|Q5SYQ9_HUMANRetinaldehydrogenase1OS=HomosapiensGN=ALDH1A1PE=1SV=1;tr|Q5SYQ8|Q5SYQ8_HUMANRetinaldehydrogenase1(Fragment)OS=HomosapiensGN=ALDH1A1PE=1SV=1	sp|P00352|AL1A1_HUMANRetinaldehydrogenase1OS=HomosapiensGN=ALDH1A1PE=1SV=2;tr|Q5SYQ7|Q5SYQ7_HUMANRetinaldehydrogenase1(Fragment)OS=HomosapiensGN=ALDH1A1PE=1SV=1;tr|Q5SYQ9|Q5SYQ9_HUMANRetinaldehydrogenase1OS=HomosapiensGN=ALDH1A1PE=1SV=1;tr|Q5SYQ8|Q5SYQ8_HUMANRetinaldehydrogenase1(Fragment)OS=HomosapiensGN=ALDH1A1PE=1SV=1	27;15;15;15	27;15;15;15	25;13;13;13	;;;	4	27	27	25	10	10	11	12	4	13	9	0	11	8	7	8	3	7	1	20	11	3	2	2	1	10	10	11	12	4	13	9	0	11	8	7	8	3	7	1	20	11	3	2
sp|P00367|DHE3_HUMANGlutamatedehydrogenase1,mitochondrialOS=HomosapiensGN=GLUD1PE=1SV=2	sp|P00367|DHE3_HUMANGlutamatedehydrogenase1,mitochondrialOS=HomosapiensGN=GLUD1PE=1SV=2	1	1	1		1	1	1	1	0	0	0	0	0	0	0	0	0	0	0	0	0	1	0	0	0	0	0	0	0	0	0	0	0	0	0	0	0	0	0	0	0	0	1	0	0	0	0	0
sp|P00387|NB5R3_HUMANNADH-cytochromeb5reductase3OS=HomosapiensGN=CYB5R3PE=1SV=3	sp|P00387|NB5R3_HUMANNADH-cytochromeb5reductase3OS=HomosapiensGN=CYB5R3PE=1SV=3	2	2	2		1	2	2	2	1	0	0	0	0	0	0	0	0	0	1	1	1	2	0	0	0	0	0	0	0	1	0	0	0	0	0	0	0	0	0	1	1	1	2	0	0	0	0	0
sp|P00390|GSHR_HUMANGlutathionereductase,mitochondrialOS=HomosapiensGN=GSRPE=1SV=2;tr|H0YC68|H0YC68_HUMANGlutathionereductase,mitochondrial(Fragment)OS=HomosapiensGN=GSRPE=1SV=1	sp|P00390|GSHR_HUMANGlutathionereductase,mitochondrialOS=HomosapiensGN=GSRPE=1SV=2;tr|H0YC68|H0YC68_HUMANGlutathionereductase,mitochondrial(Fragment)OS=HomosapiensGN=GSRPE=1SV=1	2;1	2;1	2;1	;	2	2	2	2	0	2	1	1	0	0	1	0	1	0	0	1	0	1	0	1	0	0	0	0	1	0	2	1	1	0	0	1	0	1	0	0	1	0	1	0	1	0	0	0
sp|P00450|CERU_HUMANCeruloplasminOS=HomosapiensGN=CPPE=1SV=1;tr|E9PFZ2|E9PFZ2_HUMANCeruloplasminOS=HomosapiensGN=CPPE=1SV=1;tr|H7C5R1|H7C5R1_HUMANCeruloplasmin(Fragment)OS=HomosapiensGN=CPPE=1SV=1;tr|D6RE86|D6RE86_HUMANCeruloplasmin(Fragment)OS=HomosapiensGN=CPPE=1SV=8;CON__ENSEMBL:ENSBTAP00000031900;tr|H7C5N5|H7C5N5_HUMANCeruloplasmin(Fragment)OS=HomosapiensGN=CPPE=1SV=1	sp|P00450|CERU_HUMANCeruloplasminOS=HomosapiensGN=CPPE=1SV=1;tr|E9PFZ2|E9PFZ2_HUMANCeruloplasminOS=HomosapiensGN=CPPE=1SV=1;tr|H7C5R1|H7C5R1_HUMANCeruloplasmin(Fragment)OS=HomosapiensGN=CPPE=1SV=1	41;38;27;7;5;2	41;38;27;7;5;2	41;38;27;7;5;2	;;	6	41	41	41	24	19	24	27	3	12	3	0	8	0	17	14	26	12	3	12	14	8	5	13	1	24	19	24	27	3	12	3	0	8	0	17	14	26	12	3	12	14	8	5
sp|P00488|F13A_HUMANCoagulationfactorXIIIAchainOS=HomosapiensGN=F13A1PE=1SV=4	sp|P00488|F13A_HUMANCoagulationfactorXIIIAchainOS=HomosapiensGN=F13A1PE=1SV=4	2	2	2		1	2	2	2	0	0	0	0	0	0	0	0	0	0	0	0	2	0	0	0	0	1	0	0	0	0	0	0	0	0	0	0	0	0	0	0	0	2	0	0	0	0	1	0
sp|P00491|PNPH_HUMANPurinenucleosidephosphorylaseOS=HomosapiensGN=PNPPE=1SV=2;tr|G3V5M2|G3V5M2_HUMANPurinenucleosidephosphorylase(Fragment)OS=HomosapiensGN=PNPPE=1SV=1;tr|G3V393|G3V393_HUMANPurinenucleosidephosphorylase(Fragment)OS=HomosapiensGN=PNPPE=1SV=1;tr|G3V2H3|G3V2H3_HUMANPurinenucleosidephosphorylase(Fragment)OS=HomosapiensGN=PNPPE=1SV=1	sp|P00491|PNPH_HUMANPurinenucleosidephosphorylaseOS=HomosapiensGN=PNPPE=1SV=2;tr|G3V5M2|G3V5M2_HUMANPurinenucleosidephosphorylase(Fragment)OS=HomosapiensGN=PNPPE=1SV=1	4;3;1;1	4;3;1;1	4;3;1;1	;	4	4	4	4	2	0	0	0	0	4	4	0	4	0	0	0	0	0	0	0	0	0	0	0	0	2	0	0	0	0	4	4	0	4	0	0	0	0	0	0	0	0	0	0
sp|P00558|PGK1_HUMANPhosphoglyceratekinase1OS=HomosapiensGN=PGK1PE=1SV=3;sp|P07205|PGK2_HUMANPhosphoglyceratekinase2OS=HomosapiensGN=PGK2PE=1SV=3	sp|P00558|PGK1_HUMANPhosphoglyceratekinase1OS=HomosapiensGN=PGK1PE=1SV=3	32;6	32;6	32;6		2	32	32	32	11	6	12	11	3	27	21	4	21	19	5	11	4	8	1	9	5	0	1	3	1	11	6	12	11	3	27	21	4	21	19	5	11	4	8	1	9	5	0	1
sp|P00568|KAD1_HUMANAdenylatekinaseisoenzyme1OS=HomosapiensGN=AK1PE=1SV=3;tr|Q5T9B7|Q5T9B7_HUMANAdenylatekinaseisoenzyme1OS=HomosapiensGN=AK1PE=1SV=1;tr|H0Y4J6|H0Y4J6_HUMANAdenylatekinaseisoenzyme1(Fragment)OS=HomosapiensGN=AK1PE=1SV=1;tr|H0YID2|H0YID2_HUMANAdenylatekinaseisoenzyme1(Fragment)OS=HomosapiensGN=AK1PE=1SV=1	sp|P00568|KAD1_HUMANAdenylatekinaseisoenzyme1OS=HomosapiensGN=AK1PE=1SV=3;tr|Q5T9B7|Q5T9B7_HUMANAdenylatekinaseisoenzyme1OS=HomosapiensGN=AK1PE=1SV=1;tr|H0Y4J6|H0Y4J6_HUMANAdenylatekinaseisoenzyme1(Fragment)OS=HomosapiensGN=AK1PE=1SV=1	6;6;3;2	6;6;3;2	6;6;3;2	;;	4	6	6	6	4	3	2	2	2	4	4	0	3	3	2	2	0	2	0	3	1	0	0	0	0	4	3	2	2	2	4	4	0	3	3	2	2	0	2	0	3	1	0	0
sp|P00734|THRB_HUMANProthrombinOS=HomosapiensGN=F2PE=1SV=2;tr|E9PIT3|E9PIT3_HUMANProthrombinOS=HomosapiensGN=F2PE=1SV=1;tr|C9JV37|C9JV37_HUMANProthrombin(Fragment)OS=HomosapiensGN=F2PE=1SV=1;CON__P00735	sp|P00734|THRB_HUMANProthrombinOS=HomosapiensGN=F2PE=1SV=2;tr|E9PIT3|E9PIT3_HUMANProthrombinOS=HomosapiensGN=F2PE=1SV=1	21;19;8;5	21;19;8;5	21;19;8;5	;	4	21	21	21	12	4	4	4	0	3	2	0	4	0	2	5	18	4	0	8	9	0	1	0	1	12	4	4	4	0	3	2	0	4	0	2	5	18	4	0	8	9	0	1
sp|P00738|HPT_HUMANHaptoglobinOS=HomosapiensGN=HPPE=1SV=1;tr|J3QR68|J3QR68_HUMANHaptoglobin(Fragment)OS=HomosapiensGN=HPPE=1SV=1;tr|A0A0C4DGL8|A0A0C4DGL8_HUMANHaptoglobinOS=HomosapiensGN=HPPE=1SV=1;tr|J3QLC9|J3QLC9_HUMANHaptoglobin(Fragment)OS=HomosapiensGN=HPPE=1SV=1;tr|A0A087WU08|A0A087WU08_HUMANHaptoglobinOS=HomosapiensGN=HPPE=1SV=1;tr|H3BS21|H3BS21_HUMANHaptoglobin(Fragment)OS=HomosapiensGN=H…	sp|P00738|HPT_HUMANHaptoglobinOS=HomosapiensGN=HPPE=1SV=1;tr|J3QR68|J3QR68_HUMANHaptoglobin(Fragment)OS=HomosapiensGN=HPPE=1SV=1;tr|A0A0C4DGL8|A0A0C4DGL8_HUMANHaptoglobinOS=HomosapiensGN=HPPE=1SV=1;tr|J3QLC9|J3QLC9_HUMANHaptoglobin(Fragment)OS=HomosapiensGN=HPPE=1SV=1;tr|A0A087WU08|A0A087WU08_HUMANHaptoglobinOS=HomosapiensGN=HPPE=1SV=1	41;37;35;34;23;20;13;10;6;6;6	41;37;35;34;23;20;13;10;6;6;6	4;0;0;4;0;4;4;0;4;4;4	;;;;	11	41	41	4	7	10	10	9	2	11	3	1	10	1	10	6	26	15	2	30	35	5	4	7	3	7	10	10	9	2	11	3	1	10	1	10	6	26	15	2	30	35	5	4
sp|P00739|HPTR_HUMANHaptoglobin-relatedproteinOS=HomosapiensGN=HPRPE=2SV=2;tr|A0A0A0MRD9|A0A0A0MRD9_HUMANHaptoglobin-relatedproteinOS=HomosapiensGN=HPRPE=1SV=1	sp|P00739|HPTR_HUMANHaptoglobin-relatedproteinOS=HomosapiensGN=HPRPE=2SV=2;tr|A0A0A0MRD9|A0A0A0MRD9_HUMANHaptoglobin-relatedproteinOS=HomosapiensGN=HPRPE=1SV=1	21;11	5;5	5;5	;	2	21	5	5	5	6	5	5	1	4	1	1	3	0	4	3	19	6	2	11	11	3	2	3	2	0	0	0	0	0	1	0	0	0	0	0	0	5	0	0	1	0	0	0
sp|P00740|FA9_HUMANCoagulationfactorIXOS=HomosapiensGN=F9PE=1SV=2	sp|P00740|FA9_HUMANCoagulationfactorIXOS=HomosapiensGN=F9PE=1SV=2	4	4	4		1	4	4	4	0	0	0	0	0	1	0	0	0	0	0	0	4	1	0	0	0	2	0	0	0	0	0	0	0	0	1	0	0	0	0	0	0	4	1	0	0	0	2	0
sp|P00747|PLMN_HUMANPlasminogenOS=HomosapiensGN=PLGPE=1SV=2;tr|Q5TEH5|Q5TEH5_HUMANHCG2029799,isoformCRA_bOS=HomosapiensGN=PLGPE=1SV=1;tr|A6PVI2|A6PVI2_HUMANPlasminogen(Fragment)OS=HomosapiensGN=PLGPE=1SV=1;sp|Q02325|PLGB_HUMANPlasminogen-likeproteinBOS=HomosapiensGN=PLGLB1PE=3SV=1;CON__P06868	sp|P00747|PLMN_HUMANPlasminogenOS=HomosapiensGN=PLGPE=1SV=2	31;5;5;2;2	31;5;5;2;2	31;5;5;2;2		5	31	31	31	4	3	3	1	1	1	0	1	2	0	4	1	22	2	1	8	10	0	1	2	1	4	3	3	1	1	1	0	1	2	0	4	1	22	2	1	8	10	0	1
sp|P00748|FA12_HUMANCoagulationfactorXIIOS=HomosapiensGN=F12PE=1SV=3	sp|P00748|FA12_HUMANCoagulationfactorXIIOS=HomosapiensGN=F12PE=1SV=3	4	4	4		1	4	4	4	0	0	0	0	0	0	0	0	0	0	0	0	2	0	0	2	2	0	0	0	0	0	0	0	0	0	0	0	0	0	0	0	0	2	0	0	2	2	0	0
tr|E5RJF6|E5RJF6_HUMANCarbonicanhydrase1(Fragment)OS=HomosapiensGN=CA1PE=1SV=1;tr|E5RJI8|E5RJI8_HUMANCarbonicanhydrase1(Fragment)OS=HomosapiensGN=CA1PE=1SV=8;tr|E5RH81|E5RH81_HUMANCarbonicanhydrase1(Fragment)OS=HomosapiensGN=CA1PE=1SV=8;tr|H0YBE2|H0YBE2_HUMANCarbonicanhydrase1(Fragment)OS=HomosapiensGN=CA1PE=1SV=1;tr|E5RFE7|E5RFE7_HUMANCarbonicanhydrase1(Fragment)OS=HomosapiensGN=CA1PE=1SV=1;tr|E…	tr|E5RJF6|E5RJF6_HUMANCarbonicanhydrase1(Fragment)OS=HomosapiensGN=CA1PE=1SV=1;tr|E5RJI8|E5RJI8_HUMANCarbonicanhydrase1(Fragment)OS=HomosapiensGN=CA1PE=1SV=8;tr|E5RH81|E5RH81_HUMANCarbonicanhydrase1(Fragment)OS=HomosapiensGN=CA1PE=1SV=8;tr|H0YBE2|H0YBE2_HUMANCarbonicanhydrase1(Fragment)OS=HomosapiensGN=CA1PE=1SV=1;tr|E5RFE7|E5RFE7_HUMANCarbonicanhydrase1(Fragment)OS=HomosapiensGN=CA1PE=1SV=1;tr|E…	1;1;1;1;1;1;1	1;1;1;1;1;1;1	1;1;1;1;1;1;1	;;;;;;	7	1	1	1	0	0	0	0	0	1	0	0	0	0	0	0	0	0	0	0	0	0	0	0	0	0	0	0	0	0	1	0	0	0	0	0	0	0	0	0	0	0	0	0
sp|P00966|ASSY_HUMANArgininosuccinatesynthaseOS=HomosapiensGN=ASS1PE=1SV=2;tr|Q5T6L5|Q5T6L5_HUMANArgininosuccinatesynthase(Fragment)OS=HomosapiensGN=ASS1PE=1SV=1;tr|Q5T6L6|Q5T6L6_HUMANArgininosuccinatesynthase(Fragment)OS=HomosapiensGN=ASS1PE=1SV=1	sp|P00966|ASSY_HUMANArgininosuccinatesynthaseOS=HomosapiensGN=ASS1PE=1SV=2	3;1;1	3;1;1	3;1;1		3	3	3	3	0	0	1	0	1	3	1	0	3	1	0	0	0	0	0	0	0	1	1	0	0	0	0	1	0	1	3	1	0	3	1	0	0	0	0	0	0	0	1	1
sp|P01008|ANT3_HUMANAntithrombin-IIIOS=HomosapiensGN=SERPINC1PE=1SV=1;tr|Q8TCE1|Q8TCE1_HUMANAntithrombin-IIIOS=HomosapiensGN=SERPINC1PE=1SV=1;CON__P41361	sp|P01008|ANT3_HUMANAntithrombin-IIIOS=HomosapiensGN=SERPINC1PE=1SV=1;tr|Q8TCE1|Q8TCE1_HUMANAntithrombin-IIIOS=HomosapiensGN=SERPINC1PE=1SV=1	13;8;2	13;8;2	13;8;2	;	3	13	13	13	5	2	3	2	0	2	0	0	3	0	3	2	9	3	0	2	2	1	0	1	0	5	2	3	2	0	2	0	0	3	0	3	2	9	3	0	2	2	1	0
sp|P01009|A1AT_HUMANAlpha-1-antitrypsinOS=HomosapiensGN=SERPINA1PE=1SV=3;tr|A0A024R6I7|A0A024R6I7_HUMANAlpha-1-antitrypsinOS=HomosapiensGN=SERPINA1PE=1SV=1;tr|A0A0G2JRN3|A0A0G2JRN3_HUMANAlpha-1-antitrypsinOS=HomosapiensGN=SERPINA1PE=1SV=1;tr|G3V2B9|G3V2B9_HUMANAlpha-1-antitrypsin(Fragment)OS=HomosapiensGN=SERPINA1PE=1SV=1;tr|G3V544|G3V544_HUMANAlpha-1-antitrypsin(Fragment)OS=HomosapiensGN=SERPINA…	sp|P01009|A1AT_HUMANAlpha-1-antitrypsinOS=HomosapiensGN=SERPINA1PE=1SV=3;tr|A0A024R6I7|A0A024R6I7_HUMANAlpha-1-antitrypsinOS=HomosapiensGN=SERPINA1PE=1SV=1;tr|A0A0G2JRN3|A0A0G2JRN3_HUMANAlpha-1-antitrypsinOS=HomosapiensGN=SERPINA1PE=1SV=1	37;36;30;8;4;2;2	37;36;30;8;4;2;2	35;34;28;8;2;0;0	;;	7	37	37	35	17	6	17	14	6	32	23	1	27	16	7	13	15	17	1	19	19	2	0	1	1	17	6	17	14	6	32	23	1	27	16	7	13	15	17	1	19	19	2	0
sp|P01011|AACT_HUMANAlpha-1-antichymotrypsinOS=HomosapiensGN=SERPINA3PE=1SV=2;tr|G3V3A0|G3V3A0_HUMANAlpha-1-antichymotrypsinOS=HomosapiensGN=SERPINA3PE=1SV=1;tr|G3V595|G3V595_HUMANAlpha-1-antichymotrypsin(Fragment)OS=HomosapiensGN=SERPINA3PE=1SV=3;tr|A0A087WY93|A0A087WY93_HUMANAlpha-1-antichymotrypsin(Fragment)OS=HomosapiensGN=SERPINA3PE=1SV=1	sp|P01011|AACT_HUMANAlpha-1-antichymotrypsinOS=HomosapiensGN=SERPINA3PE=1SV=2;tr|G3V3A0|G3V3A0_HUMANAlpha-1-antichymotrypsinOS=HomosapiensGN=SERPINA3PE=1SV=1;tr|G3V595|G3V595_HUMANAlpha-1-antichymotrypsin(Fragment)OS=HomosapiensGN=SERPINA3PE=1SV=3	12;7;6;2	12;7;6;2	12;7;6;2	;;	4	12	12	12	2	0	2	2	2	7	2	0	11	0	1	4	5	5	1	0	2	1	1	1	0	2	0	2	2	2	7	2	0	11	0	1	4	5	5	1	0	2	1	1
sp|P01019|ANGT_HUMANAngiotensinogenOS=HomosapiensGN=AGTPE=1SV=1	sp|P01019|ANGT_HUMANAngiotensinogenOS=HomosapiensGN=AGTPE=1SV=1	4	4	4		1	4	4	4	3	0	2	0	0	4	1	0	4	2	0	1	0	1	0	2	2	1	0	1	0	3	0	2	0	0	4	1	0	4	2	0	1	0	1	0	2	2	1	0
sp|P01023|A2MG_HUMANAlpha-2-macroglobulinOS=HomosapiensGN=A2MPE=1SV=3;tr|F8W7L3|F8W7L3_HUMANAlpha-2-macroglobulin(Fragment)OS=HomosapiensGN=A2MPE=1SV=1;tr|F5H1E8|F5H1E8_HUMANAlpha-2-macroglobulinOS=HomosapiensGN=A2MPE=1SV=1	sp|P01023|A2MG_HUMANAlpha-2-macroglobulinOS=HomosapiensGN=A2MPE=1SV=3	95;6;1	95;6;1	78;6;1		3	95	95	78	55	36	44	47	6	55	19	1	46	11	38	37	78	56	12	51	56	10	10	25	4	55	36	44	47	6	55	19	1	46	11	38	37	78	56	12	51	56	10	10
sp|P01024|CO3_HUMANComplementC3OS=HomosapiensGN=C3PE=1SV=2;tr|M0QYC8|M0QYC8_HUMANComplementC3(Fragment)OS=HomosapiensGN=C3PE=1SV=1;CON__Q2UVX4;tr|M0QXZ3|M0QXZ3_HUMANComplementC3(Fragment)OS=HomosapiensGN=C3PE=1SV=1;tr|M0R0Q9|M0R0Q9_HUMANComplementC3(Fragment)OS=HomosapiensGN=C3PE=1SV=1;tr|M0R1Q1|M0R1Q1_HUMANComplementC3(Fragment)OS=HomosapiensGN=C3PE=1SV=1;sp|O95568|MET18_HUMANHistidineproteinmet…	sp|P01024|CO3_HUMANComplementC3OS=HomosapiensGN=C3PE=1SV=2	149;12;12;11;5;2;1	149;12;12;11;5;2;1	149;12;12;11;5;2;1		7	149	149	149	89	63	91	88	29	113	87	1	100	69	50	69	89	78	9	83	81	12	4	21	6	89	63	91	88	29	113	87	1	100	69	50	69	89	78	9	83	81	12	4
sp|P01031|CO5_HUMANComplementC5OS=HomosapiensGN=C5PE=1SV=4;CON__Q1A7A4	sp|P01031|CO5_HUMANComplementC5OS=HomosapiensGN=C5PE=1SV=4	20;2	20;2	20;2		2	20	20	20	8	1	7	5	0	4	1	0	8	0	5	3	18	8	0	2	2	0	0	2	0	8	1	7	5	0	4	1	0	8	0	5	3	18	8	0	2	2	0	0
sp|P01037|CYTN_HUMANCystatin-SNOS=HomosapiensGN=CST1PE=1SV=3;sp|P01036|CYTS_HUMANCystatin-SOS=HomosapiensGN=CST4PE=1SV=3	sp|P01037|CYTN_HUMANCystatin-SNOS=HomosapiensGN=CST1PE=1SV=3	4;1	4;1	4;1		2	4	4	4	0	0	0	0	0	2	1	0	2	0	0	0	0	0	0	2	1	0	0	0	0	0	0	0	0	0	2	1	0	2	0	0	0	0	0	0	2	1	0	0
sp|P01042|KNG1_HUMANKininogen-1OS=HomosapiensGN=KNG1PE=1SV=2;CON__P01045-1;CON__Q2KJ62;CON__P01044-1	sp|P01042|KNG1_HUMANKininogen-1OS=HomosapiensGN=KNG1PE=1SV=2	14;1;1;1	14;1;1;1	14;1;1;1		4	14	14	14	4	2	2	1	0	2	1	0	4	1	2	2	11	3	0	6	6	0	0	0	0	4	2	2	1	0	2	1	0	4	1	2	2	11	3	0	6	6	0	0
sp|P01591|IGJ_HUMANImmunoglobulinJchainOS=HomosapiensGN=JCHAINPE=1SV=4;tr|D6RD17|D6RD17_HUMANImmunoglobulinJchain(Fragment)OS=HomosapiensGN=JCHAINPE=1SV=8;tr|D6RHJ6|D6RHJ6_HUMANImmunoglobulinJchain(Fragment)OS=HomosapiensGN=JCHAINPE=1SV=1;tr|C9JA05|C9JA05_HUMANImmunoglobulinJchain(Fragment)OS=HomosapiensGN=JCHAINPE=1SV=1	sp|P01591|IGJ_HUMANImmunoglobulinJchainOS=HomosapiensGN=JCHAINPE=1SV=4;tr|D6RD17|D6RD17_HUMANImmunoglobulinJchain(Fragment)OS=HomosapiensGN=JCHAINPE=1SV=8;tr|D6RHJ6|D6RHJ6_HUMANImmunoglobulinJchain(Fragment)OS=HomosapiensGN=JCHAINPE=1SV=1;tr|C9JA05|C9JA05_HUMANImmunoglobulinJchain(Fragment)OS=HomosapiensGN=JCHAINPE=1SV=1	15;14;12;8	15;14;12;8	15;14;12;8	;;;	4	15	15	15	8	7	7	7	2	9	7	0	6	0	5	6	6	6	1	13	14	6	4	4	1	8	7	7	7	2	9	7	0	6	0	5	6	6	6	1	13	14	6	4
sp|P01594|KV133_HUMANImmunoglobulinkappavariable1-33OS=HomosapiensGN=IGKV1-33PE=1SV=2;sp|P01593|KVD33_HUMANImmunoglobulinkappavariable1D-33OS=HomosapiensGN=IGKV1D-33PE=1SV=2	sp|P01594|KV133_HUMANImmunoglobulinkappavariable1-33OS=HomosapiensGN=IGKV1-33PE=1SV=2;sp|P01593|KVD33_HUMANImmunoglobulinkappavariable1D-33OS=HomosapiensGN=IGKV1D-33PE=1SV=2	1;1	1;1	1;1	;	2	1	1	1	0	0	0	0	0	0	0	0	0	0	0	0	0	0	0	1	1	0	0	0	0	0	0	0	0	0	0	0	0	0	0	0	0	0	0	0	1	1	0	0
sp|P04432|KVD39_HUMANImmunoglobulinkappavariable1D-39OS=HomosapiensGN=IGKV1D-39PE=3SV=2;sp|P01597|KV139_HUMANImmunoglobulinkappavariable1-39OS=HomosapiensGN=IGKV1-39PE=1SV=2	sp|P04432|KVD39_HUMANImmunoglobulinkappavariable1D-39OS=HomosapiensGN=IGKV1D-39PE=3SV=2;sp|P01597|KV139_HUMANImmunoglobulinkappavariable1-39OS=HomosapiensGN=IGKV1-39PE=1SV=2	3;3	3;3	2;2	;	2	3	3	2	0	0	0	0	0	1	0	0	0	1	0	0	1	0	0	1	1	0	0	0	0	0	0	0	0	0	1	0	0	0	1	0	0	1	0	0	1	1	0	0
sp|P01599|KV117_HUMANImmunoglobulinkappavariable1-17OS=HomosapiensGN=IGKV1-17PE=1SV=2	sp|P01599|KV117_HUMANImmunoglobulinkappavariable1-17OS=HomosapiensGN=IGKV1-17PE=1SV=2	2	2	1		1	2	2	1	1	1	0	0	0	1	0	0	2	0	0	0	2	0	0	1	0	0	0	0	0	1	1	0	0	0	1	0	0	2	0	0	0	2	0	0	1	0	0	0
sp|P01602|KV105_HUMANImmunoglobulinkappavariable1-5OS=HomosapiensGN=IGKV1-5PE=1SV=2	sp|P01602|KV105_HUMANImmunoglobulinkappavariable1-5OS=HomosapiensGN=IGKV1-5PE=1SV=2	3	3	3		1	3	3	3	2	1	1	1	0	1	1	0	1	0	0	0	2	1	0	1	1	0	0	0	0	2	1	1	1	0	1	1	0	1	0	0	0	2	1	0	1	1	0	0
sp|P01619|KV320_HUMANImmunoglobulinkappavariable3-20OS=HomosapiensGN=IGKV3-20PE=1SV=2	sp|P01619|KV320_HUMANImmunoglobulinkappavariable3-20OS=HomosapiensGN=IGKV3-20PE=1SV=2	5	5	2		1	5	5	2	2	0	3	2	1	4	1	0	4	2	0	1	2	1	0	3	3	0	0	0	0	2	0	3	2	1	4	1	0	4	2	0	1	2	1	0	3	3	0	0
sp|P01624|KV315_HUMANImmunoglobulinkappavariable3-15OS=HomosapiensGN=IGKV3-15PE=1SV=2;sp|A0A087WSY6|KVD15_HUMANImmunoglobulinkappavariable3D-15OS=HomosapiensGN=IGKV3D-15PE=3SV=6;tr|A0A0C4DH90|A0A0C4DH90_HUMANImmunoglobulinkappavariable3/OR2-268(non-functional)(Fragment)OS=HomosapiensGN=IGKV3OR2-268PE=4SV=5;sp|A0A0C4DH55|KVD07_HUMANImmunoglobulinkappavariable3D-7OS=HomosapiensGN=IGKV3D-7PE=3SV=5;t…	sp|P01624|KV315_HUMANImmunoglobulinkappavariable3-15OS=HomosapiensGN=IGKV3-15PE=1SV=2;sp|A0A087WSY6|KVD15_HUMANImmunoglobulinkappavariable3D-15OS=HomosapiensGN=IGKV3D-15PE=3SV=6;tr|A0A0C4DH90|A0A0C4DH90_HUMANImmunoglobulinkappavariable3/OR2-268(non-functional)(Fragment)OS=HomosapiensGN=IGKV3OR2-268PE=4SV=5;sp|A0A0C4DH55|KVD07_HUMANImmunoglobulinkappavariable3D-7OS=HomosapiensGN=IGKV3D-7PE=3SV=5	3;2;2;2;1	2;1;1;1;1	2;1;1;1;1	;;;	5	3	2	2	3	1	3	3	0	3	2	0	1	0	0	0	3	1	0	2	2	0	0	0	0	2	0	2	2	0	2	2	0	1	0	0	0	2	1	0	2	2	0	0
sp|P01699|LV144_HUMANImmunoglobulinlambdavariable1-44OS=HomosapiensGN=IGLV1-44PE=1SV=2	sp|P01699|LV144_HUMANImmunoglobulinlambdavariable1-44OS=HomosapiensGN=IGLV1-44PE=1SV=2	4	1	1		1	4	1	1	1	1	2	2	1	2	1	0	2	0	0	1	1	1	0	1	4	0	0	1	0	0	0	0	0	0	0	0	0	0	0	0	0	0	0	0	0	1	0	0
sp|P01700|LV147_HUMANImmunoglobulinlambdavariable1-47OS=HomosapiensGN=IGLV1-47PE=1SV=2;CON__ENSEMBL:ENSBTAP00000014147;CON__Q1RMN8	sp|P01700|LV147_HUMANImmunoglobulinlambdavariable1-47OS=HomosapiensGN=IGLV1-47PE=1SV=2	4;1;1	4;1;1	1;0;0		3	4	4	1	1	1	3	3	1	3	1	0	2	0	0	1	2	1	0	2	4	0	1	2	0	1	1	3	3	1	3	1	0	2	0	0	1	2	1	0	2	4	0	1
sp|P01701|LV151_HUMANImmunoglobulinlambdavariable1-51OS=HomosapiensGN=IGLV1-51PE=1SV=2	sp|P01701|LV151_HUMANImmunoglobulinlambdavariable1-51OS=HomosapiensGN=IGLV1-51PE=1SV=2	1	1	1		1	1	1	1	1	0	0	0	0	1	0	0	0	0	0	0	1	1	0	0	0	0	0	0	0	1	0	0	0	0	1	0	0	0	0	0	0	1	1	0	0	0	0	0
sp|P01703|LV140_HUMANImmunoglobulinlambdavariable1-40OS=HomosapiensGN=IGLV1-40PE=1SV=2	sp|P01703|LV140_HUMANImmunoglobulinlambdavariable1-40OS=HomosapiensGN=IGLV1-40PE=1SV=2	3	2	2		1	3	2	2	0	0	1	1	1	1	0	0	0	0	0	0	1	0	0	1	2	0	0	0	0	0	0	1	1	1	1	0	0	0	0	0	0	1	0	0	1	1	0	0
sp|P01704|LV214_HUMANImmunoglobulinlambdavariable2-14OS=HomosapiensGN=IGLV2-14PE=1SV=2	sp|P01704|LV214_HUMANImmunoglobulinlambdavariable2-14OS=HomosapiensGN=IGLV2-14PE=1SV=2	2	2	2		1	2	2	2	0	0	0	0	0	0	0	0	0	0	0	0	1	0	0	1	2	0	0	0	0	0	0	0	0	0	0	0	0	0	0	0	0	1	0	0	1	2	0	0
sp|P01709|LV208_HUMANImmunoglobulinlambdavariable2-8OS=HomosapiensGN=IGLV2-8PE=1SV=2;sp|P01706|LV211_HUMANImmunoglobulinlambdavariable2-11OS=HomosapiensGN=IGLV2-11PE=1SV=2	sp|P01709|LV208_HUMANImmunoglobulinlambdavariable2-8OS=HomosapiensGN=IGLV2-8PE=1SV=2;sp|P01706|LV211_HUMANImmunoglobulinlambdavariable2-11OS=HomosapiensGN=IGLV2-11PE=1SV=2	2;2	1;1	1;1	;	2	2	1	1	0	1	1	1	0	1	0	0	1	0	0	0	0	0	0	0	1	0	0	0	0	0	1	1	1	0	1	0	0	1	0	0	0	0	0	0	0	0	0	0
sp|P01714|LV319_HUMANImmunoglobulinlambdavariable3-19OS=HomosapiensGN=IGLV3-19PE=1SV=2	sp|P01714|LV319_HUMANImmunoglobulinlambdavariable3-19OS=HomosapiensGN=IGLV3-19PE=1SV=2	1	1	1		1	1	1	1	1	0	0	0	0	0	0	0	0	0	0	0	1	0	0	1	1	1	0	0	0	1	0	0	0	0	0	0	0	0	0	0	0	1	0	0	1	1	1	0
sp|P01717|LV325_HUMANImmunoglobulinlambdavariable3-25OS=HomosapiensGN=IGLV3-25PE=1SV=2	sp|P01717|LV325_HUMANImmunoglobulinlambdavariable3-25OS=HomosapiensGN=IGLV3-25PE=1SV=2	3	2	1		1	3	2	1	1	0	0	0	0	1	0	0	1	0	1	1	2	1	1	3	3	0	0	0	0	1	0	0	0	0	1	0	0	0	0	1	1	1	1	1	2	2	0	0
sp|P01718|LV327_HUMANImmunoglobulinlambdavariable3-27OS=HomosapiensGN=IGLV3-27PE=1SV=2	sp|P01718|LV327_HUMANImmunoglobulinlambdavariable3-27OS=HomosapiensGN=IGLV3-27PE=1SV=2	2	1	1		1	2	1	1	1	0	0	0	0	1	0	0	0	0	1	1	1	1	1	1	2	0	0	1	0	0	0	0	0	0	0	0	0	0	0	0	0	0	0	0	0	1	0	0
tr|A0A0J9YY99|A0A0J9YY99_HUMANUncharacterizedprotein(Fragment)OS=HomosapiensPE=1SV=1;sp|P0DP03|HV335_HUMANImmunoglobulinheavyvariable3-30-5OS=HomosapiensGN=IGHV3-30-5PE=3SV=1;sp|P01768|HV330_HUMANImmunoglobulinheavyvariable3-30OS=HomosapiensGN=IGHV3-30PE=1SV=2;sp|P01764|HV323_HUMANImmunoglobulinheavyvariable3-23OS=HomosapiensGN=IGHV3-23PE=1SV=2	tr|A0A0J9YY99|A0A0J9YY99_HUMANUncharacterizedprotein(Fragment)OS=HomosapiensPE=1SV=1;sp|P0DP03|HV335_HUMANImmunoglobulinheavyvariable3-30-5OS=HomosapiensGN=IGHV3-30-5PE=3SV=1;sp|P01768|HV330_HUMANImmunoglobulinheavyvariable3-30OS=HomosapiensGN=IGHV3-30PE=1SV=2;sp|P01764|HV323_HUMANImmunoglobulinheavyvariable3-23OS=HomosapiensGN=IGHV3-23PE=1SV=2	5;5;5;5	1;1;1;1	1;1;1;1	;;;	4	5	1	1	2	2	2	2	1	4	2	0	3	2	0	0	4	3	0	4	3	1	1	1	0	0	0	0	0	0	0	0	0	0	0	0	0	1	1	0	1	0	0	0
sp|P01780|HV307_HUMANImmunoglobulinheavyvariable3-7OS=HomosapiensGN=IGHV3-7PE=1SV=2;sp|P01763|HV348_HUMANImmunoglobulinheavyvariable3-48OS=HomosapiensGN=IGHV3-48PE=1SV=2;sp|P01762|HV311_HUMANImmunoglobulinheavyvariable3-11OS=HomosapiensGN=IGHV3-11PE=1SV=2;sp|A0A0B4J1V1|HV321_HUMANImmunoglobulinheavyvariable3-21OS=HomosapiensGN=IGHV3-21PE=1SV=1;tr|A0A075B7F0|A0A075B7F0_HUMANImmunoglobulinheavyvari…	sp|P01780|HV307_HUMANImmunoglobulinheavyvariable3-7OS=HomosapiensGN=IGHV3-7PE=1SV=2;sp|P01763|HV348_HUMANImmunoglobulinheavyvariable3-48OS=HomosapiensGN=IGHV3-48PE=1SV=2;sp|P01762|HV311_HUMANImmunoglobulinheavyvariable3-11OS=HomosapiensGN=IGHV3-11PE=1SV=2;sp|A0A0B4J1V1|HV321_HUMANImmunoglobulinheavyvariable3-21OS=HomosapiensGN=IGHV3-21PE=1SV=1;tr|A0A075B7F0|A0A075B7F0_HUMANImmunoglobulinheavyvari…	7;6;6;6;5;5;2	3;2;2;2;2;2;1	1;0;0;0;0;0;0	;;;;;	7	7	3	1	2	2	2	1	1	6	2	0	3	2	2	1	3	2	0	7	5	1	1	3	0	2	2	2	1	1	2	1	0	2	1	2	0	2	1	0	3	2	1	0
sp|P01782|HV309_HUMANImmunoglobulinheavyvariable3-9OS=HomosapiensGN=IGHV3-9PE=1SV=2	sp|P01782|HV309_HUMANImmunoglobulinheavyvariable3-9OS=HomosapiensGN=IGHV3-9PE=1SV=2	7	2	0		1	7	2	0	1	1	1	1	1	5	1	0	2	2	1	0	1	2	0	7	5	1	1	3	0	0	0	0	0	0	0	0	0	0	0	0	0	0	0	0	2	1	0	0
sp|P01817|HV205_HUMANImmunoglobulinheavyvariable2-5OS=HomosapiensGN=IGHV2-5PE=1SV=2	sp|P01817|HV205_HUMANImmunoglobulinheavyvariable2-5OS=HomosapiensGN=IGHV2-5PE=1SV=2	1	1	1		1	1	1	1	0	0	0	0	0	0	0	0	0	0	0	0	1	0	0	0	0	0	0	0	0	0	0	0	0	0	0	0	0	0	0	0	0	1	0	0	0	0	0	0
sp|P01833|PIGR_HUMANPolymericimmunoglobulinreceptorOS=HomosapiensGN=PIGRPE=1SV=4	sp|P01833|PIGR_HUMANPolymericimmunoglobulinreceptorOS=HomosapiensGN=PIGRPE=1SV=4	56	56	56		1	56	56	56	23	21	31	28	8	28	18	0	17	14	12	13	11	14	2	47	41	8	4	11	2	23	21	31	28	8	28	18	0	17	14	12	13	11	14	2	47	41	8	4
sp|P01834|IGKC_HUMANImmunoglobulinkappaconstantOS=HomosapiensGN=IGKCPE=1SV=2	sp|P01834|IGKC_HUMANImmunoglobulinkappaconstantOS=HomosapiensGN=IGKCPE=1SV=2	17	17	17		1	17	17	17	7	6	8	7	2	8	5	0	4	3	5	4	8	5	1	16	17	3	2	5	1	7	6	8	7	2	8	5	0	4	3	5	4	8	5	1	16	17	3	2
sp|P01857|IGHG1_HUMANImmunoglobulinheavyconstantgamma1OS=HomosapiensGN=IGHG1PE=1SV=1;tr|A0A0A0MS08|A0A0A0MS08_HUMANImmunoglobulinheavyconstantgamma1(Fragment)OS=HomosapiensGN=IGHG1PE=1SV=1;tr|A0A0A0MS07|A0A0A0MS07_HUMANImmunoglobulinheavyconstantgamma1(Fragment)OS=HomosapiensGN=IGHG1PE=1SV=1	sp|P01857|IGHG1_HUMANImmunoglobulinheavyconstantgamma1OS=HomosapiensGN=IGHG1PE=1SV=1;tr|A0A0A0MS08|A0A0A0MS08_HUMANImmunoglobulinheavyconstantgamma1(Fragment)OS=HomosapiensGN=IGHG1PE=1SV=1;tr|A0A0A0MS07|A0A0A0MS07_HUMANImmunoglobulinheavyconstantgamma1(Fragment)OS=HomosapiensGN=IGHG1PE=1SV=1	28;28;24	28;28;24	13;13;11	;;	3	28	28	13	13	6	10	8	3	11	7	0	9	6	7	7	17	12	0	25	24	3	3	5	1	13	6	10	8	3	11	7	0	9	6	7	7	17	12	0	25	24	3	3
sp|P01859|IGHG2_HUMANImmunoglobulinheavyconstantgamma2OS=HomosapiensGN=IGHG2PE=1SV=2	sp|P01859|IGHG2_HUMANImmunoglobulinheavyconstantgamma2OS=HomosapiensGN=IGHG2PE=1SV=2	20	9	8		1	20	9	8	5	2	4	4	2	7	5	0	6	3	5	3	12	9	1	17	17	3	4	4	1	2	0	1	1	0	3	1	0	3	0	2	1	6	4	0	8	7	1	2
sp|P01860|IGHG3_HUMANImmunoglobulinheavyconstantgamma3OS=HomosapiensGN=IGHG3PE=1SV=2	sp|P01860|IGHG3_HUMANImmunoglobulinheavyconstantgamma3OS=HomosapiensGN=IGHG3PE=1SV=2	25	14	10		1	25	14	10	10	5	8	8	2	11	7	0	7	4	5	5	13	12	1	22	22	2	3	5	1	5	4	6	5	1	4	2	0	3	1	2	3	7	7	1	12	12	0	0
sp|P01861|IGHG4_HUMANImmunoglobulinheavyconstantgamma4OS=HomosapiensGN=IGHG4PE=1SV=1	sp|P01861|IGHG4_HUMANImmunoglobulinheavyconstantgamma4OS=HomosapiensGN=IGHG4PE=1SV=1	13	6	6		1	13	6	6	7	3	5	5	2	8	6	0	7	4	3	3	10	6	1	9	9	2	2	3	2	1	1	1	1	0	2	1	0	1	0	0	0	3	1	0	4	3	0	0
sp|P01871|IGHM_HUMANImmunoglobulinheavyconstantmuOS=HomosapiensGN=IGHMPE=1SV=4;tr|A0A1B0GUU9|A0A1B0GUU9_HUMANImmunoglobulinheavyconstantmu(Fragment)OS=HomosapiensGN=IGHMPE=1SV=1	sp|P01871|IGHM_HUMANImmunoglobulinheavyconstantmuOS=HomosapiensGN=IGHMPE=1SV=4;tr|A0A1B0GUU9|A0A1B0GUU9_HUMANImmunoglobulinheavyconstantmu(Fragment)OS=HomosapiensGN=IGHMPE=1SV=1	37;36	37;36	37;36	;	2	37	37	37	13	9	13	10	4	21	7	0	14	0	9	8	16	13	1	22	27	4	3	5	2	13	9	13	10	4	21	7	0	14	0	9	8	16	13	1	22	27	4	3
sp|P01876|IGHA1_HUMANImmunoglobulinheavyconstantalpha1OS=HomosapiensGN=IGHA1PE=1SV=2	sp|P01876|IGHA1_HUMANImmunoglobulinheavyconstantalpha1OS=HomosapiensGN=IGHA1PE=1SV=2	29	29	10		1	29	29	10	15	12	13	13	8	16	12	0	12	6	9	12	13	13	3	28	28	7	5	8	4	15	12	13	13	8	16	12	0	12	6	9	12	13	13	3	28	28	7	5
sp|P01880|IGHD_HUMANImmunoglobulinheavyconstantdeltaOS=HomosapiensGN=IGHDPE=1SV=3;tr|A0A0A0MS09|A0A0A0MS09_HUMANImmunoglobulinheavyconstantdelta(Fragment)OS=HomosapiensGN=IGHDPE=1SV=1	sp|P01880|IGHD_HUMANImmunoglobulinheavyconstantdeltaOS=HomosapiensGN=IGHDPE=1SV=3;tr|A0A0A0MS09|A0A0A0MS09_HUMANImmunoglobulinheavyconstantdelta(Fragment)OS=HomosapiensGN=IGHDPE=1SV=1	1;1	1;1	1;1	;	2	1	1	1	0	0	0	0	0	0	0	0	0	0	0	0	0	0	0	1	0	0	0	0	0	0	0	0	0	0	0	0	0	0	0	0	0	0	0	0	1	0	0	0
tr|A0A140T955|A0A140T955_HUMANHLAclassIhistocompatibilityantigen,A-3alphachainOS=HomosapiensGN=HLA-APE=1SV=1;tr|A0A140T933|A0A140T933_HUMANHLAclassIhistocompatibilityantigen,A-3alphachain(Fragment)OS=HomosapiensGN=HLA-APE=1SV=1;tr|A0A1W2PPQ2|A0A1W2PPQ2_HUMANHLAclassIhistocompatibilityantigen,A-3alphachainOS=HomosapiensGN=HLA-APE=1SV=1;tr|A0A1W2PRT9|A0A1W2PRT9_HUMANHLAclassIhistocompatibilityantig…	tr|A0A140T955|A0A140T955_HUMANHLAclassIhistocompatibilityantigen,A-3alphachainOS=HomosapiensGN=HLA-APE=1SV=1;tr|A0A140T933|A0A140T933_HUMANHLAclassIhistocompatibilityantigen,A-3alphachain(Fragment)OS=HomosapiensGN=HLA-APE=1SV=1;tr|A0A1W2PPQ2|A0A1W2PPQ2_HUMANHLAclassIhistocompatibilityantigen,A-3alphachainOS=HomosapiensGN=HLA-APE=1SV=1;tr|A0A1W2PRT9|A0A1W2PRT9_HUMANHLAclassIhistocompatibilityantig…	9;9;9;9;9;9;9;9	1;1;1;1;1;1;1;1	0;0;0;0;0;0;0;0	;;;;;;;	8	9	1	0	5	3	3	2	1	4	2	0	2	1	2	3	2	4	2	4	4	1	2	1	0	0	0	0	0	0	0	0	0	0	0	0	0	0	0	1	0	0	0	0
tr|Q30118|Q30118_HUMANHLAclassIIhistocompatibilityantigen,DRalphachainOS=HomosapiensGN=HLA-DRAPE=1SV=1;tr|A0A0G2JH46|A0A0G2JH46_HUMANHLAclassIIhistocompatibilityantigen,DRalphachainOS=HomosapiensGN=HLA-DRAPE=1SV=1;tr|A0A0G2JMH6|A0A0G2JMH6_HUMANHLAclassIIhistocompatibilityantigen,DRalphachainOS=HomosapiensGN=HLA-DRAPE=1SV=1;sp|P01903|DRA_HUMANHLAclassIIhistocompatibilityantigen,DRalphachainOS=Homo…	tr|Q30118|Q30118_HUMANHLAclassIIhistocompatibilityantigen,DRalphachainOS=HomosapiensGN=HLA-DRAPE=1SV=1;tr|A0A0G2JH46|A0A0G2JH46_HUMANHLAclassIIhistocompatibilityantigen,DRalphachainOS=HomosapiensGN=HLA-DRAPE=1SV=1;tr|A0A0G2JMH6|A0A0G2JMH6_HUMANHLAclassIIhistocompatibilityantigen,DRalphachainOS=HomosapiensGN=HLA-DRAPE=1SV=1;sp|P01903|DRA_HUMANHLAclassIIhistocompatibilityantigen,DRalphachainOS=Homo…	4;4;4;4;1;1;1;1	4;4;4;4;1;1;1;1	3;3;3;3;0;0;0;0	;;;	8	4	4	3	4	0	1	1	1	2	2	0	3	1	1	3	2	3	1	3	2	0	0	1	0	4	0	1	1	1	2	2	0	3	1	1	3	2	3	1	3	2	0	0
sp|P01911|2B1F_HUMANHLAclassIIhistocompatibilityantigen,DRB1-15betachainOS=HomosapiensGN=HLA-DRB1PE=1SV=2	sp|P01911|2B1F_HUMANHLAclassIIhistocompatibilityantigen,DRB1-15betachainOS=HomosapiensGN=HLA-DRB1PE=1SV=2	5	5	0		1	5	5	0	2	2	4	3	0	2	3	0	3	2	2	2	1	3	1	1	1	0	0	1	0	2	2	4	3	0	2	3	0	3	2	2	2	1	3	1	1	1	0	0
sp|P02042|HBD_HUMANHemoglobinsubunitdeltaOS=HomosapiensGN=HBDPE=1SV=2;tr|E9PFT6|E9PFT6_HUMANHemoglobinsubunitdeltaOS=HomosapiensGN=HBDPE=1SV=1;tr|E9PEW8|E9PEW8_HUMANHemoglobinsubunitdelta(Fragment)OS=HomosapiensGN=HBDPE=1SV=1;tr|C9JRG0|C9JRG0_HUMANHemoglobinsubunitdelta(Fragment)OS=HomosapiensGN=HBDPE=1SV=1;tr|A8MUF7|A8MUF7_HUMANHemoglobinsubunitepsilon(Fragment)OS=HomosapiensGN=HBE1PE=1SV=1	sp|P02042|HBD_HUMANHemoglobinsubunitdeltaOS=HomosapiensGN=HBDPE=1SV=2;tr|E9PFT6|E9PFT6_HUMANHemoglobinsubunitdeltaOS=HomosapiensGN=HBDPE=1SV=1;tr|E9PEW8|E9PEW8_HUMANHemoglobinsubunitdelta(Fragment)OS=HomosapiensGN=HBDPE=1SV=1	17;12;9;2;1	10;7;5;1;0	10;7;5;1;0	;;	5	17	10	10	7	5	6	7	3	15	4	2	14	4	5	6	9	11	1	11	12	3	2	4	2	1	0	0	1	0	8	0	0	7	0	0	1	3	4	0	5	6	0	0
sp|P02545|LMNA_HUMANPrelamin-A/COS=HomosapiensGN=LMNAPE=1SV=1;tr|Q3BDU5|Q3BDU5_HUMANPrelamin-A/COS=HomosapiensGN=LMNAPE=1SV=1;tr|Q5TCI8|Q5TCI8_HUMANPrelamin-A/COS=HomosapiensGN=LMNAPE=1SV=1;tr|A0A0C4DGC5|A0A0C4DGC5_HUMANPrelamin-A/C(Fragment)OS=HomosapiensGN=LMNAPE=1SV=1;tr|H0YAB0|H0YAB0_HUMANPrelamin-A/C(Fragment)OS=HomosapiensGN=LMNAPE=1SV=1	sp|P02545|LMNA_HUMANPrelamin-A/COS=HomosapiensGN=LMNAPE=1SV=1;tr|Q3BDU5|Q3BDU5_HUMANPrelamin-A/COS=HomosapiensGN=LMNAPE=1SV=1;tr|Q5TCI8|Q5TCI8_HUMANPrelamin-A/COS=HomosapiensGN=LMNAPE=1SV=1	26;19;16;7;5	26;19;16;7;5	26;19;16;7;5	;;	5	26	26	26	8	1	4	3	1	4	16	0	0	10	5	9	3	15	2	0	0	0	1	1	1	8	1	4	3	1	4	16	0	0	10	5	9	3	15	2	0	0	0	1
sp|P02647|APOA1_HUMANApolipoproteinA-IOS=HomosapiensGN=APOA1PE=1SV=1;tr|F8W696|F8W696_HUMANApolipoproteinA-IOS=HomosapiensGN=APOA1PE=1SV=1;CON__P15497	sp|P02647|APOA1_HUMANApolipoproteinA-IOS=HomosapiensGN=APOA1PE=1SV=1;tr|F8W696|F8W696_HUMANApolipoproteinA-IOS=HomosapiensGN=APOA1PE=1SV=1	43;37;1	43;37;1	43;37;1	;	3	43	43	43	21	16	17	17	6	30	6	1	24	13	18	20	23	21	1	28	30	12	2	10	2	21	16	17	17	6	30	6	1	24	13	18	20	23	21	1	28	30	12	2
sp|P02649|APOE_HUMANApolipoproteinEOS=HomosapiensGN=APOEPE=1SV=1;tr|H0Y7L5|H0Y7L5_HUMANApolipoproteinE(Fragment)OS=HomosapiensGN=APOEPE=1SV=2;tr|E9PEV4|E9PEV4_HUMANApolipoproteinE(Fragment)OS=HomosapiensGN=APOEPE=1SV=1;tr|E7ERP7|E7ERP7_HUMANApolipoproteinE(Fragment)OS=HomosapiensGN=APOEPE=1SV=1;CON__Q03247	sp|P02649|APOE_HUMANApolipoproteinEOS=HomosapiensGN=APOEPE=1SV=1;tr|H0Y7L5|H0Y7L5_HUMANApolipoproteinE(Fragment)OS=HomosapiensGN=APOEPE=1SV=2;tr|E9PEV4|E9PEV4_HUMANApolipoproteinE(Fragment)OS=HomosapiensGN=APOEPE=1SV=1;tr|E7ERP7|E7ERP7_HUMANApolipoproteinE(Fragment)OS=HomosapiensGN=APOEPE=1SV=1	20;12;11;11;2	20;12;11;11;2	20;12;11;11;2	;;;	5	20	20	20	9	7	10	8	1	11	6	0	10	0	2	5	12	7	0	13	7	2	2	3	0	9	7	10	8	1	11	6	0	10	0	2	5	12	7	0	13	7	2	2
tr|V9GYG9|V9GYG9_HUMANApolipoproteinA-II(Fragment)OS=HomosapiensGN=APOA2PE=1SV=1;sp|P02652|APOA2_HUMANApolipoproteinA-IIOS=HomosapiensGN=APOA2PE=1SV=1;tr|V9GYM3|V9GYM3_HUMANApolipoproteinA-IIOS=HomosapiensGN=APOA2PE=1SV=1;tr|V9GYE3|V9GYE3_HUMANApolipoproteinA-IIOS=HomosapiensGN=APOA2PE=1SV=1;tr|V9GYC1|V9GYC1_HUMANApolipoproteinA-II(Fragment)OS=HomosapiensGN=APOA2PE=1SV=1;tr|V9GYS1|V9GYS1_HUMANApo…	tr|V9GYG9|V9GYG9_HUMANApolipoproteinA-II(Fragment)OS=HomosapiensGN=APOA2PE=1SV=1;sp|P02652|APOA2_HUMANApolipoproteinA-IIOS=HomosapiensGN=APOA2PE=1SV=1;tr|V9GYM3|V9GYM3_HUMANApolipoproteinA-IIOS=HomosapiensGN=APOA2PE=1SV=1;tr|V9GYE3|V9GYE3_HUMANApolipoproteinA-IIOS=HomosapiensGN=APOA2PE=1SV=1;tr|V9GYC1|V9GYC1_HUMANApolipoproteinA-II(Fragment)OS=HomosapiensGN=APOA2PE=1SV=1;tr|V9GYS1|V9GYS1_HUMANApo…	8;8;8;6;4;4	8;8;8;6;4;4	8;8;8;6;4;4	;;;;;	6	8	8	8	5	5	5	5	2	5	2	0	5	3	5	6	5	6	0	7	7	2	0	4	1	5	5	5	5	2	5	2	0	5	3	5	6	5	6	0	7	7	2	0
tr|K7ERI9|K7ERI9_HUMANApolipoproteinC-I(Fragment)OS=HomosapiensGN=APOC1PE=1SV=1;sp|P02654|APOC1_HUMANApolipoproteinC-IOS=HomosapiensGN=APOC1PE=1SV=1;tr|K7EJI9|K7EJI9_HUMANApolipoproteinC-IOS=HomosapiensGN=APOC1PE=1SV=1;tr|K7ELM9|K7ELM9_HUMANApolipoproteinC-IOS=HomosapiensGN=APOC1PE=1SV=1;tr|K7EPF9|K7EPF9_HUMANApolipoproteinC-IOS=HomosapiensGN=APOC1PE=1SV=1;tr|K7EKP1|K7EKP1_HUMANApolipoproteinC-I(…	tr|K7ERI9|K7ERI9_HUMANApolipoproteinC-I(Fragment)OS=HomosapiensGN=APOC1PE=1SV=1;sp|P02654|APOC1_HUMANApolipoproteinC-IOS=HomosapiensGN=APOC1PE=1SV=1;tr|K7EJI9|K7EJI9_HUMANApolipoproteinC-IOS=HomosapiensGN=APOC1PE=1SV=1;tr|K7ELM9|K7ELM9_HUMANApolipoproteinC-IOS=HomosapiensGN=APOC1PE=1SV=1;tr|K7EPF9|K7EPF9_HUMANApolipoproteinC-IOS=HomosapiensGN=APOC1PE=1SV=1;tr|K7EKP1|K7EKP1_HUMANApolipoproteinC-I(…	6;6;4;4;4;3	6;6;4;4;4;3	6;6;4;4;4;3	;;;;;	6	6	6	6	4	3	2	4	0	3	0	0	3	0	1	1	3	1	0	0	0	0	0	3	0	4	3	2	4	0	3	0	0	3	0	1	1	3	1	0	0	0	0	0
tr|A0A024R0T9|A0A024R0T9_HUMANApolipoproteinC-IIisoform1OS=HomosapiensGN=APOC2PE=1SV=1;sp|P02655|APOC2_HUMANApolipoproteinC-IIOS=HomosapiensGN=APOC2PE=1SV=1;tr|K7ER74|K7ER74_HUMANAPOC4-APOC2readthrough(NMDcandidate)OS=HomosapiensGN=APOC4-APOC2PE=1SV=1;tr|Q6P163|Q6P163_HUMANAPOC2proteinOS=HomosapiensGN=APOC2PE=1SV=1;tr|V9GYJ8|V9GYJ8_HUMANApolipoproteinC-IIOS=HomosapiensGN=APOC2PE=4SV=1	tr|A0A024R0T9|A0A024R0T9_HUMANApolipoproteinC-IIisoform1OS=HomosapiensGN=APOC2PE=1SV=1;sp|P02655|APOC2_HUMANApolipoproteinC-IIOS=HomosapiensGN=APOC2PE=1SV=1;tr|K7ER74|K7ER74_HUMANAPOC4-APOC2readthrough(NMDcandidate)OS=HomosapiensGN=APOC4-APOC2PE=1SV=1;tr|Q6P163|Q6P163_HUMANAPOC2proteinOS=HomosapiensGN=APOC2PE=1SV=1;tr|V9GYJ8|V9GYJ8_HUMANApolipoproteinC-IIOS=HomosapiensGN=APOC2PE=4SV=1	4;4;4;3;2	4;4;4;3;2	4;4;4;3;2	;;;;	5	4	4	4	1	0	1	1	0	2	1	0	1	0	0	0	3	0	0	3	4	1	0	0	0	1	0	1	1	0	2	1	0	1	0	0	0	3	0	0	3	4	1	0
sp|P02656|APOC3_HUMANApolipoproteinC-IIIOS=HomosapiensGN=APOC3PE=1SV=1;tr|B0YIW2|B0YIW2_HUMANApolipoproteinC-IIIOS=HomosapiensGN=APOC3PE=1SV=1	sp|P02656|APOC3_HUMANApolipoproteinC-IIIOS=HomosapiensGN=APOC3PE=1SV=1;tr|B0YIW2|B0YIW2_HUMANApolipoproteinC-IIIOS=HomosapiensGN=APOC3PE=1SV=1	5;5	5;5	5;5	;	2	5	5	5	2	1	1	2	0	2	0	0	1	1	1	1	1	1	0	3	5	0	1	1	0	2	1	1	2	0	2	0	0	1	1	1	1	1	1	0	3	5	0	1
sp|P02671|FIBA_HUMANFibrinogenalphachainOS=HomosapiensGN=FGAPE=1SV=2;tr|A0A087WUA0|A0A087WUA0_HUMANFibrinogenalphachainOS=HomosapiensGN=FGAPE=1SV=1	sp|P02671|FIBA_HUMANFibrinogenalphachainOS=HomosapiensGN=FGAPE=1SV=2	34;11	34;11	34;11		2	34	34	34	27	19	17	18	0	11	0	1	7	2	7	4	13	9	2	14	18	3	1	8	1	27	19	17	18	0	11	0	1	7	2	7	4	13	9	2	14	18	3	1
sp|P02675|FIBB_HUMANFibrinogenbetachainOS=HomosapiensGN=FGBPE=1SV=2;tr|D6REL8|D6REL8_HUMANFibrinogenbetachainOS=HomosapiensGN=FGBPE=1SV=1;CON__P02676	sp|P02675|FIBB_HUMANFibrinogenbetachainOS=HomosapiensGN=FGBPE=1SV=2;tr|D6REL8|D6REL8_HUMANFibrinogenbetachainOS=HomosapiensGN=FGBPE=1SV=1	29;21;4	29;21;4	29;21;4	;	3	29	29	29	22	17	22	18	0	19	0	0	18	1	5	6	9	9	1	11	13	1	0	6	2	22	17	22	18	0	19	0	0	18	1	5	6	9	9	1	11	13	1	0
tr|C9JEU5|C9JEU5_HUMANFibrinogengammachainOS=HomosapiensGN=FGGPE=1SV=1;sp|P02679|FIBG_HUMANFibrinogengammachainOS=HomosapiensGN=FGGPE=1SV=3;tr|C9JC84|C9JC84_HUMANFibrinogengammachainOS=HomosapiensGN=FGGPE=1SV=1;tr|C9JPQ9|C9JPQ9_HUMANFibrinogengammachain(Fragment)OS=HomosapiensGN=FGGPE=1SV=1;tr|C9JU00|C9JU00_HUMANFibrinogengammachain(Fragment)OS=HomosapiensGN=FGGPE=1SV=1	tr|C9JEU5|C9JEU5_HUMANFibrinogengammachainOS=HomosapiensGN=FGGPE=1SV=1;sp|P02679|FIBG_HUMANFibrinogengammachainOS=HomosapiensGN=FGGPE=1SV=3;tr|C9JC84|C9JC84_HUMANFibrinogengammachainOS=HomosapiensGN=FGGPE=1SV=1	18;18;18;5;5	18;18;18;5;5	18;18;18;5;5	;;	5	18	18	18	11	10	11	13	1	13	0	0	10	2	6	6	9	9	2	7	6	0	0	5	2	11	10	11	13	1	13	0	0	10	2	6	6	9	9	2	7	6	0	0
sp|P02730|B3AT_HUMANBand3aniontransportproteinOS=HomosapiensGN=SLC4A1PE=1SV=3;tr|A0A0A0MS98|A0A0A0MS98_HUMANBand3aniontransportproteinOS=HomosapiensGN=SLC4A1PE=1SV=1	sp|P02730|B3AT_HUMANBand3aniontransportproteinOS=HomosapiensGN=SLC4A1PE=1SV=3;tr|A0A0A0MS98|A0A0A0MS98_HUMANBand3aniontransportproteinOS=HomosapiensGN=SLC4A1PE=1SV=1	8;6	8;6	8;6	;	2	8	8	8	5	0	1	1	0	7	2	0	3	0	0	0	1	2	0	0	0	0	0	0	0	5	0	1	1	0	7	2	0	3	0	0	0	1	2	0	0	0	0	0
sp|P02745|C1QA_HUMANComplementC1qsubcomponentsubunitAOS=HomosapiensGN=C1QAPE=1SV=2;tr|X6RLJ0|X6RLJ0_HUMANComplementC1qsubcomponentsubunitA(Fragment)OS=HomosapiensGN=C1QAPE=1SV=7	sp|P02745|C1QA_HUMANComplementC1qsubcomponentsubunitAOS=HomosapiensGN=C1QAPE=1SV=2;tr|X6RLJ0|X6RLJ0_HUMANComplementC1qsubcomponentsubunitA(Fragment)OS=HomosapiensGN=C1QAPE=1SV=7	4;3	4;3	4;3	;	2	4	4	4	2	2	2	2	0	1	2	0	0	1	1	0	3	1	1	2	1	0	0	1	0	2	2	2	2	0	1	2	0	0	1	1	0	3	1	1	2	1	0	0
tr|A0A0A0MSV6|A0A0A0MSV6_HUMANComplementC1qsubcomponentsubunitB(Fragment)OS=HomosapiensGN=C1QBPE=1SV=6;tr|D6R934|D6R934_HUMANComplementC1qsubcomponentsubunitBOS=HomosapiensGN=C1QBPE=1SV=1;sp|P02746|C1QB_HUMANComplementC1qsubcomponentsubunitBOS=HomosapiensGN=C1QBPE=1SV=3;tr|D6RGJ1|D6RGJ1_HUMANComplementC1qsubcomponentsubunitB(Fragment)OS=HomosapiensGN=C1QBPE=1SV=1	tr|A0A0A0MSV6|A0A0A0MSV6_HUMANComplementC1qsubcomponentsubunitB(Fragment)OS=HomosapiensGN=C1QBPE=1SV=6;tr|D6R934|D6R934_HUMANComplementC1qsubcomponentsubunitBOS=HomosapiensGN=C1QBPE=1SV=1;sp|P02746|C1QB_HUMANComplementC1qsubcomponentsubunitBOS=HomosapiensGN=C1QBPE=1SV=3	7;7;7;2	7;7;7;2	7;7;7;2	;;	4	7	7	7	4	2	5	5	1	4	2	0	5	1	2	2	5	3	0	3	4	0	1	1	0	4	2	5	5	1	4	2	0	5	1	2	2	5	3	0	3	4	0	1
sp|P02747|C1QC_HUMANComplementC1qsubcomponentsubunitCOS=HomosapiensGN=C1QCPE=1SV=3	sp|P02747|C1QC_HUMANComplementC1qsubcomponentsubunitCOS=HomosapiensGN=C1QCPE=1SV=3	4	4	4		1	4	4	4	3	4	4	4	1	3	2	0	3	2	3	3	3	3	0	3	2	1	1	1	0	3	4	4	4	1	3	2	0	3	2	3	3	3	3	0	3	2	1	1
sp|P02748|CO9_HUMANComplementcomponentC9OS=HomosapiensGN=C9PE=1SV=2;CON__Q3MHN2	sp|P02748|CO9_HUMANComplementcomponentC9OS=HomosapiensGN=C9PE=1SV=2	14;3	14;3	14;3		2	14	14	14	6	2	3	1	0	2	1	0	4	0	4	3	5	2	0	10	11	0	0	0	0	6	2	3	1	0	2	1	0	4	0	4	3	5	2	0	10	11	0	0
sp|P02749|APOH_HUMANBeta-2-glycoprotein1OS=HomosapiensGN=APOHPE=1SV=3;tr|J3QRN2|J3QRN2_HUMANBeta-2-glycoprotein1(Fragment)OS=HomosapiensGN=APOHPE=1SV=1;tr|J3QLI0|J3QLI0_HUMANBeta-2-glycoprotein1(Fragment)OS=HomosapiensGN=APOHPE=1SV=1;tr|J3KS17|J3KS17_HUMANBeta-2-glycoprotein1(Fragment)OS=HomosapiensGN=APOHPE=1SV=1;CON__P17690	sp|P02749|APOH_HUMANBeta-2-glycoprotein1OS=HomosapiensGN=APOHPE=1SV=3	12;5;5;3;1	12;5;5;3;1	12;5;5;3;1		5	12	12	12	5	0	2	3	1	3	0	0	2	0	0	0	8	2	0	3	5	0	0	0	1	5	0	2	3	1	3	0	0	2	0	0	0	8	2	0	3	5	0	0
sp|P02750|A2GL_HUMANLeucine-richalpha-2-glycoproteinOS=HomosapiensGN=LRG1PE=1SV=2	sp|P02750|A2GL_HUMANLeucine-richalpha-2-glycoproteinOS=HomosapiensGN=LRG1PE=1SV=2	3	3	3		1	3	3	3	0	0	0	0	0	0	0	0	0	0	1	1	1	1	0	1	2	0	0	1	1	0	0	0	0	0	0	0	0	0	0	1	1	1	1	0	1	2	0	0
sp|P02751|FINC_HUMANFibronectinOS=HomosapiensGN=FN1PE=1SV=4;tr|H0Y7Z1|H0Y7Z1_HUMANFibronectin(Fragment)OS=HomosapiensGN=FN1PE=1SV=1	sp|P02751|FINC_HUMANFibronectinOS=HomosapiensGN=FN1PE=1SV=4	92;44	92;44	87;39		2	92	92	87	37	14	21	23	2	22	3	0	18	5	11	14	59	28	0	45	48	4	3	3	1	37	14	21	23	2	22	3	0	18	5	11	14	59	28	0	45	48	4	3
tr|Q5VY30|Q5VY30_HUMANRetinolbindingprotein4,plasma,isoformCRA_bOS=HomosapiensGN=RBP4PE=1SV=2;sp|P02753|RET4_HUMANRetinol-bindingprotein4OS=HomosapiensGN=RBP4PE=1SV=3	tr|Q5VY30|Q5VY30_HUMANRetinolbindingprotein4,plasma,isoformCRA_bOS=HomosapiensGN=RBP4PE=1SV=2;sp|P02753|RET4_HUMANRetinol-bindingprotein4OS=HomosapiensGN=RBP4PE=1SV=3	2;2	2;2	2;2	;	2	2	2	2	0	0	0	0	0	0	0	0	0	0	0	0	0	0	0	2	2	1	0	0	0	0	0	0	0	0	0	0	0	0	0	0	0	0	0	0	2	2	1	0
sp|P02760|AMBP_HUMANProteinAMBPOS=HomosapiensGN=AMBPPE=1SV=1;tr|S4R471|S4R471_HUMANProteinAMBP(Fragment)OS=HomosapiensGN=AMBPPE=1SV=1;tr|S4R3Y4|S4R3Y4_HUMANProteinAMBPOS=HomosapiensGN=AMBPPE=1SV=1;CON__P00978	sp|P02760|AMBP_HUMANProteinAMBPOS=HomosapiensGN=AMBPPE=1SV=1	13;5;3;1	13;5;3;1	13;5;3;1		4	13	13	13	2	0	1	0	0	1	1	0	0	0	4	2	8	3	0	8	8	1	0	3	0	2	0	1	0	0	1	1	0	0	0	4	2	8	3	0	8	8	1	0
sp|P02763|A1AG1_HUMANAlpha-1-acidglycoprotein1OS=HomosapiensGN=ORM1PE=1SV=1	sp|P02763|A1AG1_HUMANAlpha-1-acidglycoprotein1OS=HomosapiensGN=ORM1PE=1SV=1	9	9	5		1	9	9	5	0	0	0	0	0	0	0	0	0	0	2	0	4	2	1	3	7	0	0	1	0	0	0	0	0	0	0	0	0	0	0	2	0	4	2	1	3	7	0	0
sp|P02765|FETUA_HUMANAlpha-2-HS-glycoproteinOS=HomosapiensGN=AHSGPE=1SV=1;tr|C9JV77|C9JV77_HUMANAlpha-2-HS-glycoproteinOS=HomosapiensGN=AHSGPE=1SV=1	sp|P02765|FETUA_HUMANAlpha-2-HS-glycoproteinOS=HomosapiensGN=AHSGPE=1SV=1;tr|C9JV77|C9JV77_HUMANAlpha-2-HS-glycoproteinOS=HomosapiensGN=AHSGPE=1SV=1	16;15	16;15	14;14	;	2	16	16	14	6	4	6	5	1	6	1	0	3	1	3	4	4	5	0	14	13	1	0	1	0	6	4	6	5	1	6	1	0	3	1	3	4	4	5	0	14	13	1	0
sp|P02766|TTHY_HUMANTransthyretinOS=HomosapiensGN=TTRPE=1SV=1;tr|A0A087WT59|A0A087WT59_HUMANTransthyretinOS=HomosapiensGN=TTRPE=1SV=1;tr|A0A087WV45|A0A087WV45_HUMANTransthyretinOS=HomosapiensGN=TTRPE=1SV=1	sp|P02766|TTHY_HUMANTransthyretinOS=HomosapiensGN=TTRPE=1SV=1;tr|A0A087WT59|A0A087WT59_HUMANTransthyretinOS=HomosapiensGN=TTRPE=1SV=1;tr|A0A087WV45|A0A087WV45_HUMANTransthyretinOS=HomosapiensGN=TTRPE=1SV=1	6;6;4	6;6;4	6;6;4	;;	3	6	6	6	2	1	0	1	1	1	0	0	2	0	1	1	4	2	0	4	5	0	1	0	0	2	1	0	1	1	1	0	0	2	0	1	1	4	2	0	4	5	0	1
sp|P02776|PLF4_HUMANPlateletfactor4OS=HomosapiensGN=PF4PE=1SV=2;sp|P10720|PF4V_HUMANPlateletfactor4variantOS=HomosapiensGN=PF4V1PE=1SV=1	sp|P02776|PLF4_HUMANPlateletfactor4OS=HomosapiensGN=PF4PE=1SV=2	5;2	5;2	5;2		2	5	5	5	0	0	0	0	0	0	0	0	0	0	0	0	5	1	0	0	1	0	0	0	0	0	0	0	0	0	0	0	0	0	0	0	0	5	1	0	0	1	0	0
sp|P02786|TFR1_HUMANTransferrinreceptorprotein1OS=HomosapiensGN=TFRCPE=1SV=2;tr|G3V0E5|G3V0E5_HUMANTransferrinreceptor(P90,CD71),isoformCRA_cOS=HomosapiensGN=TFRCPE=1SV=1;tr|F8WBE5|F8WBE5_HUMANTransferrinreceptorprotein1OS=HomosapiensGN=TFRCPE=1SV=1;tr|H7C3V5|H7C3V5_HUMANTransferrinreceptorprotein1(Fragment)OS=HomosapiensGN=TFRCPE=1SV=1	sp|P02786|TFR1_HUMANTransferrinreceptorprotein1OS=HomosapiensGN=TFRCPE=1SV=2;tr|G3V0E5|G3V0E5_HUMANTransferrinreceptor(P90,CD71),isoformCRA_cOS=HomosapiensGN=TFRCPE=1SV=1	15;14;1;1	15;14;1;1	15;14;1;1	;	4	15	15	15	7	4	7	7	2	10	2	0	11	3	2	6	3	7	0	0	1	2	1	0	0	7	4	7	7	2	10	2	0	11	3	2	6	3	7	0	0	1	2	1
sp|P02787|TRFE_HUMANSerotransferrinOS=HomosapiensGN=TFPE=1SV=3;tr|H7C5E8|H7C5E8_HUMANSerotransferrin(Fragment)OS=HomosapiensGN=TFPE=1SV=1;tr|F8WEK9|F8WEK9_HUMANSerotransferrinOS=HomosapiensGN=TFPE=1SV=1;tr|F8WCI6|F8WCI6_HUMANSerotransferrinOS=HomosapiensGN=TFPE=1SV=1;tr|C9JVG0|C9JVG0_HUMANSerotransferrin(Fragment)OS=HomosapiensGN=TFPE=1SV=1;tr|C9JB55|C9JB55_HUMANSerotransferrin(Fragment)OS=Homosa…	sp|P02787|TRFE_HUMANSerotransferrinOS=HomosapiensGN=TFPE=1SV=3	81;13;10;10;9;5;4;1	81;13;10;10;9;5;4;1	80;12;10;10;9;5;4;0		8	81	81	80	15	12	14	15	2	15	17	1	8	3	14	10	39	16	3	61	68	8	1	6	1	15	12	14	15	2	15	17	1	8	3	14	10	39	16	3	61	68	8	1
sp|P02788|TRFL_HUMANLactotransferrinOS=HomosapiensGN=LTFPE=1SV=6;tr|E7EQB2|E7EQB2_HUMANLactotransferrin(Fragment)OS=HomosapiensGN=LTFPE=1SV=1;tr|E7ER44|E7ER44_HUMANLactotransferrinOS=HomosapiensGN=LTFPE=1SV=1;tr|C9JCF5|C9JCF5_HUMANLactotransferrin(Fragment)OS=HomosapiensGN=LTFPE=1SV=1	sp|P02788|TRFL_HUMANLactotransferrinOS=HomosapiensGN=LTFPE=1SV=6;tr|E7EQB2|E7EQB2_HUMANLactotransferrin(Fragment)OS=HomosapiensGN=LTFPE=1SV=1;tr|E7ER44|E7ER44_HUMANLactotransferrinOS=HomosapiensGN=LTFPE=1SV=1	96;95;95;17	96;95;95;17	92;91;91;17	;;	4	96	96	92	20	16	24	26	2	23	7	0	16	0	24	22	4	23	14	69	47	54	75	81	4	20	16	24	26	2	23	7	0	16	0	24	22	4	23	14	69	47	54	75
sp|P02790|HEMO_HUMANHemopexinOS=HomosapiensGN=HPXPE=1SV=2;tr|Q9BS19|Q9BS19_HUMANHPXproteinOS=HomosapiensGN=HPXPE=1SV=1	sp|P02790|HEMO_HUMANHemopexinOS=HomosapiensGN=HPXPE=1SV=2;tr|Q9BS19|Q9BS19_HUMANHPXproteinOS=HomosapiensGN=HPXPE=1SV=1	17;10	17;10	17;10	;	2	17	17	17	4	0	3	5	0	4	1	0	1	0	4	3	11	6	0	8	12	0	0	0	1	4	0	3	5	0	4	1	0	1	0	4	3	11	6	0	8	12	0	0
sp|P02792|FRIL_HUMANFerritinlightchainOS=HomosapiensGN=FTLPE=1SV=2	sp|P02792|FRIL_HUMANFerritinlightchainOS=HomosapiensGN=FTLPE=1SV=2	2	2	2		1	2	2	2	0	0	0	0	0	0	0	0	0	0	0	0	0	0	0	2	0	0	0	0	0	0	0	0	0	0	0	0	0	0	0	0	0	0	0	0	2	0	0	0
tr|G3V1D1|G3V1D1_HUMANFerritinOS=HomosapiensGN=FTH1PE=1SV=1;tr|G3V192|G3V192_HUMANFerritinOS=HomosapiensGN=FTH1PE=1SV=1;sp|P02794|FRIH_HUMANFerritinheavychainOS=HomosapiensGN=FTH1PE=1SV=2	tr|G3V1D1|G3V1D1_HUMANFerritinOS=HomosapiensGN=FTH1PE=1SV=1;tr|G3V192|G3V192_HUMANFerritinOS=HomosapiensGN=FTH1PE=1SV=1;sp|P02794|FRIH_HUMANFerritinheavychainOS=HomosapiensGN=FTH1PE=1SV=2	1;1;1	1;1;1	1;1;1	;;	3	1	1	1	0	0	0	0	0	0	0	0	0	0	0	0	0	0	0	1	0	0	0	0	0	0	0	0	0	0	0	0	0	0	0	0	0	0	0	0	1	0	0	0
sp|P03952|KLKB1_HUMANPlasmakallikreinOS=HomosapiensGN=KLKB1PE=1SV=1;tr|H0YAC1|H0YAC1_HUMANPlasmakallikrein(Fragment)OS=HomosapiensGN=KLKB1PE=1SV=1;tr|E9PBC5|E9PBC5_HUMANPlasmakallikreinOS=HomosapiensGN=KLKB1PE=1SV=2;tr|C9JCT1|C9JCT1_HUMANPlasmakallikrein(Fragment)OS=HomosapiensGN=KLKB1PE=1SV=1;tr|C9J075|C9J075_HUMANPlasmakallikrein(Fragment)OS=HomosapiensGN=KLKB1PE=1SV=1	sp|P03952|KLKB1_HUMANPlasmakallikreinOS=HomosapiensGN=KLKB1PE=1SV=1;tr|H0YAC1|H0YAC1_HUMANPlasmakallikrein(Fragment)OS=HomosapiensGN=KLKB1PE=1SV=1;tr|E9PBC5|E9PBC5_HUMANPlasmakallikreinOS=HomosapiensGN=KLKB1PE=1SV=2	11;11;8;2;2	11;11;8;2;2	11;11;8;2;2	;;	5	11	11	11	1	1	0	0	0	0	0	0	0	0	2	1	11	1	0	0	0	0	0	0	0	1	1	0	0	0	0	0	0	0	0	2	1	11	1	0	0	0	0	0
sp|P03973|SLPI_HUMANAntileukoproteinaseOS=HomosapiensGN=SLPIPE=1SV=2	sp|P03973|SLPI_HUMANAntileukoproteinaseOS=HomosapiensGN=SLPIPE=1SV=2	8	8	8		1	8	8	8	3	4	3	3	1	1	0	0	0	0	4	4	1	4	1	5	4	3	3	6	0	3	4	3	3	1	1	0	0	0	0	4	4	1	4	1	5	4	3	3
sp|P04003|C4BPA_HUMANC4b-bindingproteinalphachainOS=HomosapiensGN=C4BPAPE=1SV=2;tr|A6PVY5|A6PVY5_HUMANC4b-bindingproteinalphachain(Fragment)OS=HomosapiensGN=C4BPAPE=1SV=1	sp|P04003|C4BPA_HUMANC4b-bindingproteinalphachainOS=HomosapiensGN=C4BPAPE=1SV=2	26;1	26;1	26;1		2	26	26	26	4	2	2	4	0	1	1	0	3	0	3	1	20	2	0	11	13	0	0	1	1	4	2	2	4	0	1	1	0	3	0	3	1	20	2	0	11	13	0	0
sp|P04004|VTNC_HUMANVitronectinOS=HomosapiensGN=VTNPE=1SV=1;tr|F5GX75|F5GX75_HUMANVitronectin(Fragment)OS=HomosapiensGN=VTNPE=1SV=2;tr|H0YJW9|H0YJW9_HUMANUncharacterizedprotein(Fragment)OS=HomosapiensPE=1SV=3	sp|P04004|VTNC_HUMANVitronectinOS=HomosapiensGN=VTNPE=1SV=1	10;1;1	10;1;1	8;1;1		3	10	10	8	4	5	7	6	1	5	1	0	6	0	3	2	6	3	0	5	8	0	1	2	2	4	5	7	6	1	5	1	0	6	0	3	2	6	3	0	5	8	0	1
sp|P04040|CATA_HUMANCatalaseOS=HomosapiensGN=CATPE=1SV=3	sp|P04040|CATA_HUMANCatalaseOS=HomosapiensGN=CATPE=1SV=3	13	13	13		1	13	13	13	3	4	5	6	0	3	2	0	5	1	3	6	2	4	2	7	5	2	2	7	3	3	4	5	6	0	3	2	0	5	1	3	6	2	4	2	7	5	2	2
sp|P04075|ALDOA_HUMANFructose-bisphosphatealdolaseAOS=HomosapiensGN=ALDOAPE=1SV=2;tr|H3BQN4|H3BQN4_HUMANFructose-bisphosphatealdolaseOS=HomosapiensGN=ALDOAPE=1SV=1;tr|J3KPS3|J3KPS3_HUMANFructose-bisphosphatealdolaseOS=HomosapiensGN=ALDOAPE=1SV=1;tr|H3BUH7|H3BUH7_HUMANFructose-bisphosphatealdolaseA(Fragment)OS=HomosapiensGN=ALDOAPE=1SV=1;tr|H3BPS8|H3BPS8_HUMANFructose-bisphosphatealdolaseA(Fragmen…	sp|P04075|ALDOA_HUMANFructose-bisphosphatealdolaseAOS=HomosapiensGN=ALDOAPE=1SV=2;tr|H3BQN4|H3BQN4_HUMANFructose-bisphosphatealdolaseOS=HomosapiensGN=ALDOAPE=1SV=1;tr|J3KPS3|J3KPS3_HUMANFructose-bisphosphatealdolaseOS=HomosapiensGN=ALDOAPE=1SV=1;tr|H3BUH7|H3BUH7_HUMANFructose-bisphosphatealdolaseA(Fragment)OS=HomosapiensGN=ALDOAPE=1SV=1;tr|H3BPS8|H3BPS8_HUMANFructose-bisphosphatealdolaseA(Fragmen…	16;15;15;11;11;10;9;6;3;1	16;15;15;11;11;10;9;6;3;1	16;15;15;11;11;10;9;6;3;1	;;;;;;	10	16	16	16	8	8	7	8	2	11	4	2	11	3	5	7	5	9	1	9	6	1	1	1	0	8	8	7	8	2	11	4	2	11	3	5	7	5	9	1	9	6	1	1
sp|P04080|CYTB_HUMANCystatin-BOS=HomosapiensGN=CSTBPE=1SV=2;tr|A0A1W2PS52|A0A1W2PS52_HUMANCystatin-BOS=HomosapiensGN=CSTBPE=1SV=1;tr|A0A1W2PQG6|A0A1W2PQG6_HUMANCystatin-B(Fragment)OS=HomosapiensGN=CSTBPE=1SV=1	sp|P04080|CYTB_HUMANCystatin-BOS=HomosapiensGN=CSTBPE=1SV=2;tr|A0A1W2PS52|A0A1W2PS52_HUMANCystatin-BOS=HomosapiensGN=CSTBPE=1SV=1	4;2;1	4;2;1	4;2;1	;	3	4	4	4	3	3	4	4	0	3	2	0	1	3	1	1	0	2	0	2	2	0	1	0	0	3	3	4	4	0	3	2	0	1	3	1	1	0	2	0	2	2	0	1
sp|P04083|ANXA1_HUMANAnnexinA1OS=HomosapiensGN=ANXA1PE=1SV=2;tr|Q5T3N1|Q5T3N1_HUMANAnnexin(Fragment)OS=HomosapiensGN=ANXA1PE=1SV=1;tr|Q5T3N0|Q5T3N0_HUMANAnnexin(Fragment)OS=HomosapiensGN=ANXA1PE=1SV=1	sp|P04083|ANXA1_HUMANAnnexinA1OS=HomosapiensGN=ANXA1PE=1SV=2;tr|Q5T3N1|Q5T3N1_HUMANAnnexin(Fragment)OS=HomosapiensGN=ANXA1PE=1SV=1	42;23;10	42;23;10	42;23;10	;	3	42	42	42	20	22	27	28	18	35	30	1	31	26	6	8	3	7	3	17	10	4	2	6	1	20	22	27	28	18	35	30	1	31	26	6	8	3	7	3	17	10	4	2
sp|P04114|APOB_HUMANApolipoproteinB-100OS=HomosapiensGN=APOBPE=1SV=2;tr|A8MUN2|A8MUN2_HUMANApolipoproteinB-100OS=HomosapiensGN=APOBPE=1SV=2	sp|P04114|APOB_HUMANApolipoproteinB-100OS=HomosapiensGN=APOBPE=1SV=2	57;24	57;24	54;21		2	57	57	54	17	5	2	5	3	36	1	0	31	1	7	3	30	12	4	6	10	1	1	5	5	17	5	2	5	3	36	1	0	31	1	7	3	30	12	4	6	10	1	1
sp|P04196|HRG_HUMANHistidine-richglycoproteinOS=HomosapiensGN=HRGPE=1SV=1	sp|P04196|HRG_HUMANHistidine-richglycoproteinOS=HomosapiensGN=HRGPE=1SV=1	17	17	17		1	17	17	17	6	3	4	3	1	0	1	0	1	1	4	2	10	7	1	8	10	0	0	1	1	6	3	4	3	1	0	1	0	1	1	4	2	10	7	1	8	10	0	0
sp|P04211|LV743_HUMANImmunoglobulinlambdavariable7-43OS=HomosapiensGN=IGLV7-43PE=3SV=2;sp|A0A075B6I9|LV746_HUMANImmunoglobulinlambdavariable7-46OS=HomosapiensGN=IGLV7-46PE=3SV=4	sp|P04211|LV743_HUMANImmunoglobulinlambdavariable7-43OS=HomosapiensGN=IGLV7-43PE=3SV=2;sp|A0A075B6I9|LV746_HUMANImmunoglobulinlambdavariable7-46OS=HomosapiensGN=IGLV7-46PE=3SV=4	3;2	3;2	3;2	;	2	3	3	3	1	1	2	2	0	0	0	0	0	0	0	0	1	0	0	0	0	0	0	0	0	1	1	2	2	0	0	0	0	0	0	0	0	1	0	0	0	0	0	0
sp|P04217|A1BG_HUMANAlpha-1B-glycoproteinOS=HomosapiensGN=A1BGPE=1SV=4;tr|M0R009|M0R009_HUMANAlpha-1B-glycoprotein(Fragment)OS=HomosapiensGN=A1BGPE=1SV=8	sp|P04217|A1BG_HUMANAlpha-1B-glycoproteinOS=HomosapiensGN=A1BGPE=1SV=4;tr|M0R009|M0R009_HUMANAlpha-1B-glycoprotein(Fragment)OS=HomosapiensGN=A1BGPE=1SV=8	15;8	15;8	15;8	;	2	15	15	15	5	2	3	3	1	4	0	0	4	0	1	2	6	2	1	6	11	0	0	0	0	5	2	3	3	1	4	0	0	4	0	1	2	6	2	1	6	11	0	0
sp|P04264|K2C1_HUMANKeratin,typeIIcytoskeletal1OS=HomosapiensGN=KRT1PE=1SV=6;CON__P04264	sp|P04264|K2C1_HUMANKeratin,typeIIcytoskeletal1OS=HomosapiensGN=KRT1PE=1SV=6;CON__P04264	40;39	40;39	24;23	;	2	40	40	24	29	28	30	34	8	20	7	2	24	16	24	23	22	28	6	1	2	5	4	6	2	29	28	30	34	8	20	7	2	24	16	24	23	22	28	6	1	2	5	4
sp|P04275|VWF_HUMANvonWillebrandfactorOS=HomosapiensGN=VWFPE=1SV=4	sp|P04275|VWF_HUMANvonWillebrandfactorOS=HomosapiensGN=VWFPE=1SV=4	25	25	25		1	25	25	25	1	1	1	1	0	0	0	0	2	0	0	0	23	1	0	0	3	1	1	0	0	1	1	1	1	0	0	0	0	2	0	0	0	23	1	0	0	3	1	1
sp|P04279|SEMG1_HUMANSemenogelin-1OS=HomosapiensGN=SEMG1PE=1SV=2	sp|P04279|SEMG1_HUMANSemenogelin-1OS=HomosapiensGN=SEMG1PE=1SV=2	1	1	1		1	1	1	1	0	0	0	0	0	0	0	0	0	0	0	0	1	0	0	0	0	0	0	0	0	0	0	0	0	0	0	0	0	0	0	0	0	1	0	0	0	0	0	0
sp|P04350|TBB4A_HUMANTubulinbeta-4AchainOS=HomosapiensGN=TUBB4APE=1SV=2;tr|M0R2D3|M0R2D3_HUMANTubulinbeta-4Achain(Fragment)OS=HomosapiensGN=TUBB4APE=1SV=1;tr|M0QY85|M0QY85_HUMANTubulinbeta-4Achain(Fragment)OS=HomosapiensGN=TUBB4APE=1SV=1;tr|M0R0X0|M0R0X0_HUMANTubulinbeta-4AchainOS=HomosapiensGN=TUBB4APE=1SV=1;tr|M0QY37|M0QY37_HUMANTubulinbeta-4AchainOS=HomosapiensGN=TUBB4APE=1SV=1;tr|M0QX14|M0QX1…	sp|P04350|TBB4A_HUMANTubulinbeta-4AchainOS=HomosapiensGN=TUBB4APE=1SV=2	23;8;5;4;4;4;4;4;4;3;2;1;1	1;0;0;0;0;0;0;0;0;0;0;0;0	0;0;0;0;0;0;0;0;0;0;0;0;0		13	23	1	0	14	10	13	13	5	21	16	5	17	15	6	8	6	11	1	12	10	1	0	1	0	0	0	0	0	0	0	0	0	0	0	0	0	0	0	0	0	0	0	0
sp|P04406|G3P_HUMANGlyceraldehyde-3-phosphatedehydrogenaseOS=HomosapiensGN=GAPDHPE=1SV=3;tr|E7EUT5|E7EUT5_HUMANGlyceraldehyde-3-phosphatedehydrogenaseOS=HomosapiensGN=GAPDHPE=1SV=1;sp|O14556|G3PT_HUMANGlyceraldehyde-3-phosphatedehydrogenase,testis-specificOS=HomosapiensGN=GAPDHSPE=1SV=2	sp|P04406|G3P_HUMANGlyceraldehyde-3-phosphatedehydrogenaseOS=HomosapiensGN=GAPDHPE=1SV=3;tr|E7EUT5|E7EUT5_HUMANGlyceraldehyde-3-phosphatedehydrogenaseOS=HomosapiensGN=GAPDHPE=1SV=1	34;26;1	34;26;1	34;26;1	;	3	34	34	34	12	8	13	15	7	31	21	4	20	18	6	4	6	9	2	18	10	1	0	7	1	12	8	13	15	7	31	21	4	20	18	6	4	6	9	2	18	10	1	0
sp|P04430|KV116_HUMANImmunoglobulinkappavariable1-16OS=HomosapiensGN=IGKV1-16PE=1SV=2	sp|P04430|KV116_HUMANImmunoglobulinkappavariable1-16OS=HomosapiensGN=IGKV1-16PE=1SV=2	3	3	3		1	3	3	3	0	0	0	0	0	0	0	0	0	0	0	0	2	0	0	1	1	0	0	0	0	0	0	0	0	0	0	0	0	0	0	0	0	2	0	0	1	1	0	0
tr|Q5SRN7|Q5SRN7_HUMANHLAclassIhistocompatibilityantigen,A-3alphachainOS=HomosapiensGN=HLA-APE=1SV=2;tr|A0A1W2PS24|A0A1W2PS24_HUMANHLAclassIhistocompatibilityantigen,A-3alphachainOS=HomosapiensGN=HLA-APE=1SV=1;sp|P13746|1A11_HUMANHLAclassIhistocompatibilityantigen,A-11alphachainOS=HomosapiensGN=HLA-APE=1SV=1;sp|P04439|1A03_HUMANHLAclassIhistocompatibilityantigen,A-3alphachainOS=HomosapiensGN=HLA-…	tr|Q5SRN7|Q5SRN7_HUMANHLAclassIhistocompatibilityantigen,A-3alphachainOS=HomosapiensGN=HLA-APE=1SV=2;tr|A0A1W2PS24|A0A1W2PS24_HUMANHLAclassIhistocompatibilityantigen,A-3alphachainOS=HomosapiensGN=HLA-APE=1SV=1;sp|P13746|1A11_HUMANHLAclassIhistocompatibilityantigen,A-11alphachainOS=HomosapiensGN=HLA-APE=1SV=1;sp|P04439|1A03_HUMANHLAclassIhistocompatibilityantigen,A-3alphachainOS=HomosapiensGN=HLA-…	8;8;8;8;8;7;7;7;7;7;7;7;7;6;5;4	2;2;2;2;2;2;2;2;2;2;2;2;2;1;2;2	1;1;1;1;1;1;1;1;1;1;1;1;1;0;1;1	;;;;;;;;;;;;;;;	16	8	2	1	4	4	3	2	2	2	2	0	2	2	4	4	1	7	1	3	2	1	1	1	0	0	0	0	0	0	0	0	0	0	0	1	1	0	2	0	0	0	0	0
tr|U3KQE2|U3KQE2_HUMANCalpainsmallsubunit1(Fragment)OS=HomosapiensGN=CAPNS1PE=1SV=1;tr|K7EM73|K7EM73_HUMANCalpainsmallsubunit1(Fragment)OS=HomosapiensGN=CAPNS1PE=1SV=1;tr|K7EIV0|K7EIV0_HUMANCalpainsmallsubunit1(Fragment)OS=HomosapiensGN=CAPNS1PE=1SV=2;tr|A0A075B7C0|A0A075B7C0_HUMANCalpainsmallsubunit1(Fragment)OS=HomosapiensGN=CAPNS1PE=1SV=1;sp|P04632|CPNS1_HUMANCalpainsmallsubunit1OS=Homosapiens…	tr|U3KQE2|U3KQE2_HUMANCalpainsmallsubunit1(Fragment)OS=HomosapiensGN=CAPNS1PE=1SV=1;tr|K7EM73|K7EM73_HUMANCalpainsmallsubunit1(Fragment)OS=HomosapiensGN=CAPNS1PE=1SV=1;tr|K7EIV0|K7EIV0_HUMANCalpainsmallsubunit1(Fragment)OS=HomosapiensGN=CAPNS1PE=1SV=2;tr|A0A075B7C0|A0A075B7C0_HUMANCalpainsmallsubunit1(Fragment)OS=HomosapiensGN=CAPNS1PE=1SV=1;sp|P04632|CPNS1_HUMANCalpainsmallsubunit1OS=Homosapiens…	1;1;1;1;1;1;1	1;1;1;1;1;1;1	1;1;1;1;1;1;1	;;;;;;	7	1	1	1	1	1	1	1	0	0	0	0	1	0	0	0	0	1	0	0	0	0	0	0	0	1	1	1	1	0	0	0	0	1	0	0	0	0	1	0	0	0	0	0
sp|P04792|HSPB1_HUMANHeatshockproteinbeta-1OS=HomosapiensGN=HSPB1PE=1SV=2;tr|F8WE04|F8WE04_HUMANHeatshockproteinbeta-1OS=HomosapiensGN=HSPB1PE=1SV=1;tr|C9J3N8|C9J3N8_HUMANHeatshockproteinbeta-1OS=HomosapiensGN=HSPB1PE=1SV=1	sp|P04792|HSPB1_HUMANHeatshockproteinbeta-1OS=HomosapiensGN=HSPB1PE=1SV=2;tr|F8WE04|F8WE04_HUMANHeatshockproteinbeta-1OS=HomosapiensGN=HSPB1PE=1SV=1	8;5;2	8;5;2	8;5;2	;	3	8	8	8	3	1	3	1	0	5	4	0	3	4	1	4	1	4	0	2	1	0	1	0	0	3	1	3	1	0	5	4	0	3	4	1	4	1	4	0	2	1	0	1
sp|P04839|CY24B_HUMANCytochromeb-245heavychainOS=HomosapiensGN=CYBBPE=1SV=2	sp|P04839|CY24B_HUMANCytochromeb-245heavychainOS=HomosapiensGN=CYBBPE=1SV=2	11	11	11		1	11	11	11	5	6	5	5	3	6	4	0	7	2	4	6	1	5	1	1	0	0	0	1	0	5	6	5	5	3	6	4	0	7	2	4	6	1	5	1	1	0	0	0
sp|P04843|RPN1_HUMANDolichyl-diphosphooligosaccharide--proteinglycosyltransferasesubunit1OS=HomosapiensGN=RPN1PE=1SV=1;tr|B7Z4L4|B7Z4L4_HUMANDolichyl-diphosphooligosaccharide--proteinglycosyltransferasesubunit1OS=HomosapiensGN=RPN1PE=1SV=1;tr|F8WF32|F8WF32_HUMANDolichyl-diphosphooligosaccharide--proteinglycosyltransferasesubunit1OS=HomosapiensGN=RPN1PE=1SV=1	sp|P04843|RPN1_HUMANDolichyl-diphosphooligosaccharide--proteinglycosyltransferasesubunit1OS=HomosapiensGN=RPN1PE=1SV=1;tr|B7Z4L4|B7Z4L4_HUMANDolichyl-diphosphooligosaccharide--proteinglycosyltransferasesubunit1OS=HomosapiensGN=RPN1PE=1SV=1	4;3;1	4;3;1	4;3;1	;	3	4	4	4	2	2	1	1	1	1	0	0	1	0	3	3	0	4	0	0	0	0	0	1	0	2	2	1	1	1	1	0	0	1	0	3	3	0	4	0	0	0	0	0
sp|P04899|GNAI2_HUMANGuaninenucleotide-bindingproteinG(i)subunitalpha-2OS=HomosapiensGN=GNAI2PE=1SV=3;sp|P63096|GNAI1_HUMANGuaninenucleotide-bindingproteinG(i)subunitalpha-1OS=HomosapiensGN=GNAI1PE=1SV=2;sp|P11488|GNAT1_HUMANGuaninenucleotide-bindingproteinG(t)subunitalpha-1OS=HomosapiensGN=GNAT1PE=1SV=5;sp|P09471|GNAO_HUMANGuaninenucleotide-bindingproteinG(o)subunitalphaOS=HomosapiensGN=GNAO1PE=…	sp|P04899|GNAI2_HUMANGuaninenucleotide-bindingproteinG(i)subunitalpha-2OS=HomosapiensGN=GNAI2PE=1SV=3	14;5;2;2;2;2;1;1;1;1;1;1;1;1;1;1;1;1;1;1;1	14;5;2;2;2;2;1;1;1;1;1;1;1;1;1;1;1;1;1;1;1	9;0;0;0;0;0;0;0;0;0;0;0;0;0;0;0;0;0;0;0;0		21	14	14	9	11	6	10	8	4	8	7	0	8	5	4	6	5	5	1	3	2	1	0	2	1	11	6	10	8	4	8	7	0	8	5	4	6	5	5	1	3	2	1	0
sp|P05023|AT1A1_HUMANSodium/potassium-transportingATPasesubunitalpha-1OS=HomosapiensGN=ATP1A1PE=1SV=1;tr|M0R116|M0R116_HUMANSodium/potassium-transportingATPasesubunitalphaOS=HomosapiensGN=ATP1A3PE=1SV=1;sp|P13637|AT1A3_HUMANSodium/potassium-transportingATPasesubunitalpha-3OS=HomosapiensGN=ATP1A3PE=1SV=3;tr|A0A0A0MT26|A0A0A0MT26_HUMANSodium/potassium-transportingATPasesubunitalpha-3OS=HomosapiensG…	sp|P05023|AT1A1_HUMANSodium/potassium-transportingATPasesubunitalpha-1OS=HomosapiensGN=ATP1A1PE=1SV=1	9;4;4;4;3;3;2;2;2;2;1	9;4;4;4;3;3;2;2;2;2;1	9;4;4;4;3;3;2;2;2;2;1		11	9	9	9	2	0	1	3	0	4	0	0	4	0	3	5	3	6	1	2	1	1	0	1	0	2	0	1	3	0	4	0	0	4	0	3	5	3	6	1	2	1	1	0
sp|P05026|AT1B1_HUMANSodium/potassium-transportingATPasesubunitbeta-1OS=HomosapiensGN=ATP1B1PE=1SV=1;tr|V9GYR2|V9GYR2_HUMANSodium/potassium-transportingATPasesubunitbeta(Fragment)OS=HomosapiensGN=ATP1B1PE=1SV=1	sp|P05026|AT1B1_HUMANSodium/potassium-transportingATPasesubunitbeta-1OS=HomosapiensGN=ATP1B1PE=1SV=1;tr|V9GYR2|V9GYR2_HUMANSodium/potassium-transportingATPasesubunitbeta(Fragment)OS=HomosapiensGN=ATP1B1PE=1SV=1	4;3	4;3	4;3	;	2	4	4	4	1	0	1	2	0	1	0	0	1	0	1	1	0	1	1	1	0	1	1	1	0	1	0	1	2	0	1	0	0	1	0	1	1	0	1	1	1	0	1	1
sp|P05090|APOD_HUMANApolipoproteinDOS=HomosapiensGN=APODPE=1SV=1;tr|C9JF17|C9JF17_HUMANApolipoproteinD(Fragment)OS=HomosapiensGN=APODPE=1SV=1;tr|C9JX71|C9JX71_HUMANApolipoproteinD(Fragment)OS=HomosapiensGN=APODPE=1SV=1;tr|F8WBT9|F8WBT9_HUMANApolipoproteinDOS=HomosapiensGN=APODPE=1SV=1	sp|P05090|APOD_HUMANApolipoproteinDOS=HomosapiensGN=APODPE=1SV=1;tr|C9JF17|C9JF17_HUMANApolipoproteinD(Fragment)OS=HomosapiensGN=APODPE=1SV=1	7;5;3;1	7;5;3;1	7;5;3;1	;	4	7	7	7	1	0	1	0	1	0	0	0	3	0	2	2	3	2	0	6	5	1	1	3	0	1	0	1	0	1	0	0	0	3	0	2	2	3	2	0	6	5	1	1
sp|P05091|ALDH2_HUMANAldehydedehydrogenase,mitochondrialOS=HomosapiensGN=ALDH2PE=1SV=2;tr|F8VP50|F8VP50_HUMANUncharacterizedprotein(Fragment)OS=HomosapiensPE=4SV=3;tr|S4R3S4|S4R3S4_HUMANAldehydedehydrogenase,mitochondrial(Fragment)OS=HomosapiensGN=ALDH2PE=1SV=1	sp|P05091|ALDH2_HUMANAldehydedehydrogenase,mitochondrialOS=HomosapiensGN=ALDH2PE=1SV=2	15;6;3	13;4;3	13;4;3		3	15	13	13	4	0	2	2	0	6	8	0	6	6	3	6	1	9	1	0	0	1	3	3	0	4	0	1	1	0	4	7	0	5	5	2	5	1	8	0	0	0	0	1
tr|I3L4X8|I3L4X8_HUMANIntegrinbetaOS=HomosapiensGN=ITGB3PE=3SV=1;tr|H3BM21|H3BM21_HUMANIntegrinbeta(Fragment)OS=HomosapiensPE=3SV=1;sp|P05106|ITB3_HUMANIntegrinbeta-3OS=HomosapiensGN=ITGB3PE=1SV=2	tr|I3L4X8|I3L4X8_HUMANIntegrinbetaOS=HomosapiensGN=ITGB3PE=3SV=1;tr|H3BM21|H3BM21_HUMANIntegrinbeta(Fragment)OS=HomosapiensPE=3SV=1;sp|P05106|ITB3_HUMANIntegrinbeta-3OS=HomosapiensGN=ITGB3PE=1SV=2	2;2;2	2;2;2	2;2;2	;;	3	2	2	2	0	1	0	0	0	0	0	0	0	0	0	0	2	0	0	0	0	0	0	1	0	0	1	0	0	0	0	0	0	0	0	0	0	2	0	0	0	0	0	0
sp|P05107|ITB2_HUMANIntegrinbeta-2OS=HomosapiensGN=ITGB2PE=1SV=2;tr|J3KNI6|J3KNI6_HUMANIntegrinbeta(Fragment)OS=HomosapiensGN=ITGB2PE=1SV=1;tr|E5RK25|E5RK25_HUMANIntegrinbeta(Fragment)OS=HomosapiensGN=ITGB2PE=1SV=1;tr|E5RIG7|E5RIG7_HUMANIntegrinbeta-2(Fragment)OS=HomosapiensGN=ITGB2PE=1SV=1;tr|E5RHT0|E5RHT0_HUMANIntegrinbeta-2(Fragment)OS=HomosapiensGN=ITGB2PE=1SV=1;tr|E5RFI0|E5RFI0_HUMANIntegrin…	sp|P05107|ITB2_HUMANIntegrinbeta-2OS=HomosapiensGN=ITGB2PE=1SV=2	24;10;3;2;1;1;1;1	24;10;3;2;1;1;1;1	0;0;0;0;0;0;0;0		8	24	24	0	16	15	15	15	3	5	3	0	5	2	4	11	3	13	9	7	4	6	7	16	6	16	15	15	15	3	5	3	0	5	2	4	11	3	13	9	7	4	6	7
sp|P05109|S10A8_HUMANProteinS100-A8OS=HomosapiensGN=S100A8PE=1SV=1	sp|P05109|S10A8_HUMANProteinS100-A8OS=HomosapiensGN=S100A8PE=1SV=1	5	5	5		1	5	5	5	1	1	3	2	0	5	0	0	3	0	3	2	1	1	4	2	0	3	3	5	2	1	1	3	2	0	5	0	0	3	0	3	2	1	1	4	2	0	3	3
sp|P05141|ADT2_HUMANADP/ATPtranslocase2OS=HomosapiensGN=SLC25A5PE=1SV=7;sp|P12236|ADT3_HUMANADP/ATPtranslocase3OS=HomosapiensGN=SLC25A6PE=1SV=4;sp|P12235|ADT1_HUMANADP/ATPtranslocase1OS=HomosapiensGN=SLC25A4PE=1SV=4;tr|V9GYG0|V9GYG0_HUMANADP/ATPtranslocase1OS=HomosapiensGN=SLC25A4PE=1SV=1;sp|Q9H0C2|ADT4_HUMANADP/ATPtranslocase4OS=HomosapiensGN=SLC25A31PE=2SV=1	sp|P05141|ADT2_HUMANADP/ATPtranslocase2OS=HomosapiensGN=SLC25A5PE=1SV=7;sp|P12236|ADT3_HUMANADP/ATPtranslocase3OS=HomosapiensGN=SLC25A6PE=1SV=4	7;4;3;2;2	7;4;3;2;2	7;4;3;2;2	;	5	7	7	7	4	1	3	1	1	4	3	1	4	3	1	4	2	4	1	1	0	1	1	1	0	4	1	3	1	1	4	3	1	4	3	1	4	2	4	1	1	0	1	1
sp|P05155|IC1_HUMANPlasmaproteaseC1inhibitorOS=HomosapiensGN=SERPING1PE=1SV=2;tr|E9PGN7|E9PGN7_HUMANPlasmaproteaseC1inhibitorOS=HomosapiensGN=SERPING1PE=1SV=1;tr|H9KV48|H9KV48_HUMANPlasmaproteaseC1inhibitorOS=HomosapiensGN=SERPING1PE=1SV=1	sp|P05155|IC1_HUMANPlasmaproteaseC1inhibitorOS=HomosapiensGN=SERPING1PE=1SV=2;tr|E9PGN7|E9PGN7_HUMANPlasmaproteaseC1inhibitorOS=HomosapiensGN=SERPING1PE=1SV=1;tr|H9KV48|H9KV48_HUMANPlasmaproteaseC1inhibitorOS=HomosapiensGN=SERPING1PE=1SV=1	8;8;6	8;8;6	8;8;6	;;	3	8	8	8	5	1	2	2	0	3	4	0	6	2	2	5	4	6	0	4	3	0	0	0	1	5	1	2	2	0	3	4	0	6	2	2	5	4	6	0	4	3	0	0
tr|G3XAM2|G3XAM2_HUMANComplementfactorIOS=HomosapiensGN=CFIPE=1SV=1;sp|P05156|CFAI_HUMANComplementfactorIOS=HomosapiensGN=CFIPE=1SV=2;tr|E7ETH0|E7ETH0_HUMANComplementfactorIOS=HomosapiensGN=CFIPE=1SV=1;tr|A0A087X0I2|A0A087X0I2_HUMANComplementfactorIOS=HomosapiensGN=CFIPE=1SV=1;tr|D6R9Z8|D6R9Z8_HUMANComplementfactorIOS=HomosapiensGN=CFIPE=1SV=1;CON__Q32PI4	tr|G3XAM2|G3XAM2_HUMANComplementfactorIOS=HomosapiensGN=CFIPE=1SV=1;sp|P05156|CFAI_HUMANComplementfactorIOS=HomosapiensGN=CFIPE=1SV=2;tr|E7ETH0|E7ETH0_HUMANComplementfactorIOS=HomosapiensGN=CFIPE=1SV=1;tr|A0A087X0I2|A0A087X0I2_HUMANComplementfactorIOS=HomosapiensGN=CFIPE=1SV=1;tr|D6R9Z8|D6R9Z8_HUMANComplementfactorIOS=HomosapiensGN=CFIPE=1SV=1	12;12;12;10;6;1	12;12;12;10;6;1	12;12;12;10;6;1	;;;;	6	12	12	12	3	0	1	0	0	0	0	0	0	0	1	1	8	2	0	3	4	0	0	0	0	3	0	1	0	0	0	0	0	0	0	1	1	8	2	0	3	4	0	0
sp|P05160|F13B_HUMANCoagulationfactorXIIIBchainOS=HomosapiensGN=F13BPE=1SV=3	sp|P05160|F13B_HUMANCoagulationfactorXIIIBchainOS=HomosapiensGN=F13BPE=1SV=3	1	1	1		1	1	1	1	0	0	0	0	0	0	0	0	0	0	0	0	1	0	0	0	0	0	0	0	0	0	0	0	0	0	0	0	0	0	0	0	0	1	0	0	0	0	0	0
tr|A0A096LNZ9|A0A096LNZ9_HUMANUbiquitin-likeproteinISG15(Fragment)OS=HomosapiensGN=ISG15PE=1SV=6;tr|A0A096LPJ4|A0A096LPJ4_HUMANUbiquitin-likeproteinISG15OS=HomosapiensGN=ISG15PE=1SV=1;sp|P05161|ISG15_HUMANUbiquitin-likeproteinISG15OS=HomosapiensGN=ISG15PE=1SV=5	tr|A0A096LNZ9|A0A096LNZ9_HUMANUbiquitin-likeproteinISG15(Fragment)OS=HomosapiensGN=ISG15PE=1SV=6;tr|A0A096LPJ4|A0A096LPJ4_HUMANUbiquitin-likeproteinISG15OS=HomosapiensGN=ISG15PE=1SV=1;sp|P05161|ISG15_HUMANUbiquitin-likeproteinISG15OS=HomosapiensGN=ISG15PE=1SV=5	1;1;1	1;1;1	1;1;1	;;	3	1	1	1	0	0	0	0	0	0	1	0	1	0	0	0	0	0	0	0	0	0	0	0	0	0	0	0	0	0	0	1	0	1	0	0	0	0	0	0	0	0	0	0
sp|P05164|PERM_HUMANMyeloperoxidaseOS=HomosapiensGN=MPOPE=1SV=1;tr|J3QSF7|J3QSF7_HUMANMyeloperoxidase(Fragment)OS=HomosapiensGN=MPOPE=1SV=8	sp|P05164|PERM_HUMANMyeloperoxidaseOS=HomosapiensGN=MPOPE=1SV=1	71;12	71;12	64;10		2	71	71	64	38	32	38	41	8	32	7	0	24	3	13	12	4	12	14	48	23	39	53	55	6	38	32	38	41	8	32	7	0	24	3	13	12	4	12	14	48	23	39	53
sp|P05186|PPBT_HUMANAlkalinephosphatase,tissue-nonspecificisozymeOS=HomosapiensGN=ALPLPE=1SV=4;tr|B1ANL0|B1ANL0_HUMANAlkalinephosphatase,tissue-nonspecificisozyme(Fragment)OS=HomosapiensGN=ALPLPE=1SV=2	sp|P05186|PPBT_HUMANAlkalinephosphatase,tissue-nonspecificisozymeOS=HomosapiensGN=ALPLPE=1SV=4	21;6	21;6	21;6		2	21	21	21	5	6	6	5	0	9	1	0	5	0	1	0	0	2	0	16	14	0	0	1	0	5	6	6	5	0	9	1	0	5	0	1	0	0	2	0	16	14	0	0
sp|P05362|ICAM1_HUMANIntercellularadhesionmolecule1OS=HomosapiensGN=ICAM1PE=1SV=2;tr|K7EKL8|K7EKL8_HUMANIntercellularadhesionmolecule1(Fragment)OS=HomosapiensGN=ICAM1PE=1SV=1;tr|E7ESS4|E7ESS4_HUMANIntercellularadhesionmolecule1OS=HomosapiensGN=ICAM1PE=1SV=1	sp|P05362|ICAM1_HUMANIntercellularadhesionmolecule1OS=HomosapiensGN=ICAM1PE=1SV=2;tr|K7EKL8|K7EKL8_HUMANIntercellularadhesionmolecule1(Fragment)OS=HomosapiensGN=ICAM1PE=1SV=1	16;9;6	16;9;6	16;9;6	;	3	16	16	16	10	7	9	7	2	8	3	0	9	7	3	8	0	8	0	15	14	0	0	2	0	10	7	9	7	2	8	3	0	9	7	3	8	0	8	0	15	14	0	0
sp|P05386|RLA1_HUMAN60SacidicribosomalproteinP1OS=HomosapiensGN=RPLP1PE=1SV=1	sp|P05386|RLA1_HUMAN60SacidicribosomalproteinP1OS=HomosapiensGN=RPLP1PE=1SV=1	1	1	1		1	1	1	1	1	0	1	1	0	1	1	0	1	0	0	0	0	0	0	0	0	0	0	0	0	1	0	1	1	0	1	1	0	1	0	0	0	0	0	0	0	0	0	0
sp|P05387|RLA2_HUMAN60SacidicribosomalproteinP2OS=HomosapiensGN=RPLP2PE=1SV=1;tr|H0YDD8|H0YDD8_HUMAN60SacidicribosomalproteinP2(Fragment)OS=HomosapiensGN=RPLP2PE=1SV=1	sp|P05387|RLA2_HUMAN60SacidicribosomalproteinP2OS=HomosapiensGN=RPLP2PE=1SV=1;tr|H0YDD8|H0YDD8_HUMAN60SacidicribosomalproteinP2(Fragment)OS=HomosapiensGN=RPLP2PE=1SV=1	2;1	2;1	2;1	;	2	2	2	2	1	1	2	2	0	0	0	0	0	0	1	1	1	1	0	1	0	0	0	0	0	1	1	2	2	0	0	0	0	0	0	1	1	1	1	0	1	0	0	0
tr|G3V210|G3V210_HUMAN60SacidicribosomalproteinP0OS=HomosapiensGN=RPLP0PE=1SV=1;tr|F8VU65|F8VU65_HUMAN60SacidicribosomalproteinP0(Fragment)OS=HomosapiensGN=RPLP0PE=1SV=1;tr|F8VWS0|F8VWS0_HUMAN60SacidicribosomalproteinP0OS=HomosapiensGN=RPLP0PE=1SV=1;sp|Q8NHW5|RLA0L_HUMAN60SacidicribosomalproteinP0-likeOS=HomosapiensGN=RPLP0P6PE=5SV=1;sp|P05388|RLA0_HUMAN60SacidicribosomalproteinP0OS=HomosapiensGN…	tr|G3V210|G3V210_HUMAN60SacidicribosomalproteinP0OS=HomosapiensGN=RPLP0PE=1SV=1;tr|F8VU65|F8VU65_HUMAN60SacidicribosomalproteinP0(Fragment)OS=HomosapiensGN=RPLP0PE=1SV=1;tr|F8VWS0|F8VWS0_HUMAN60SacidicribosomalproteinP0OS=HomosapiensGN=RPLP0PE=1SV=1;sp|Q8NHW5|RLA0L_HUMAN60SacidicribosomalproteinP0-likeOS=HomosapiensGN=RPLP0P6PE=5SV=1;sp|P05388|RLA0_HUMAN60SacidicribosomalproteinP0OS=HomosapiensGN…	3;3;3;3;3;2;2;2;2;2;2;1	3;3;3;3;3;2;2;2;2;2;2;1	3;3;3;3;3;2;2;2;2;2;2;1	;;;;;;;;;;	12	3	3	3	2	1	2	2	0	3	1	1	2	2	0	0	1	0	0	0	0	0	0	1	0	2	1	2	2	0	3	1	1	2	2	0	0	1	0	0	0	0	0	0
sp|P05546|HEP2_HUMANHeparincofactor2OS=HomosapiensGN=SERPIND1PE=1SV=3;CON__ENSEMBL:ENSBTAP00000018574	sp|P05546|HEP2_HUMANHeparincofactor2OS=HomosapiensGN=SERPIND1PE=1SV=3	11;2	11;2	11;2		2	11	11	11	4	4	6	7	1	4	3	0	4	3	0	1	6	1	0	2	1	1	1	1	0	4	4	6	7	1	4	3	0	4	3	0	1	6	1	0	2	1	1	1
sp|P05556|ITB1_HUMANIntegrinbeta-1OS=HomosapiensGN=ITGB1PE=1SV=2;tr|H7C4N8|H7C4N8_HUMANIntegrinbeta-1(Fragment)OS=HomosapiensGN=ITGB1PE=1SV=1	sp|P05556|ITB1_HUMANIntegrinbeta-1OS=HomosapiensGN=ITGB1PE=1SV=2;tr|H7C4N8|H7C4N8_HUMANIntegrinbeta-1(Fragment)OS=HomosapiensGN=ITGB1PE=1SV=1	2;1	2;1	2;1	;	2	2	2	2	0	0	0	0	0	0	0	0	0	0	0	2	0	2	0	1	0	0	0	0	0	0	0	0	0	0	0	0	0	0	0	0	2	0	2	0	1	0	0	0
sp|P05976|MYL1_HUMANMyosinlightchain1/3,skeletalmuscleisoformOS=HomosapiensGN=MYL1PE=2SV=3;sp|P08590|MYL3_HUMANMyosinlightchain3OS=HomosapiensGN=MYL3PE=1SV=3	sp|P05976|MYL1_HUMANMyosinlightchain1/3,skeletalmuscleisoformOS=HomosapiensGN=MYL1PE=2SV=3;sp|P08590|MYL3_HUMANMyosinlightchain3OS=HomosapiensGN=MYL3PE=1SV=3	1;1	1;1	1;1	;	2	1	1	1	1	1	1	1	0	0	0	0	1	0	1	1	1	1	0	0	0	0	0	0	0	1	1	1	1	0	0	0	0	1	0	1	1	1	1	0	0	0	0	0
sp|P06310|KV230_HUMANImmunoglobulinkappavariable2-30OS=HomosapiensGN=IGKV2-30PE=3SV=2;sp|A0A075B6S6|KVD30_HUMANImmunoglobulinkappavariable2D-30OS=HomosapiensGN=IGKV2D-30PE=3SV=1;sp|A0A0A0MRZ7|KVD26_HUMANImmunoglobulinkappavariable2D-26OS=HomosapiensGN=IGKV2D-26PE=3SV=1	sp|P06310|KV230_HUMANImmunoglobulinkappavariable2-30OS=HomosapiensGN=IGKV2-30PE=3SV=2	5;2;1	5;2;1	4;1;0		3	5	5	4	2	2	2	2	1	1	0	0	1	0	1	1	3	1	0	4	4	0	0	1	0	2	2	2	2	1	1	0	0	1	0	1	1	3	1	0	4	4	0	0
sp|P06312|KV401_HUMANImmunoglobulinkappavariable4-1OS=HomosapiensGN=IGKV4-1PE=1SV=1	sp|P06312|KV401_HUMANImmunoglobulinkappavariable4-1OS=HomosapiensGN=IGKV4-1PE=1SV=1	2	2	2		1	2	2	2	1	0	1	1	0	0	0	0	0	0	1	1	2	1	0	0	0	0	0	0	0	1	0	1	1	0	0	0	0	0	0	1	1	2	1	0	0	0	0	0
sp|P06331|HV434_HUMANImmunoglobulinheavyvariable4-34OS=HomosapiensGN=IGHV4-34PE=1SV=2;sp|P01825|HV459_HUMANImmunoglobulinheavyvariable4-59OS=HomosapiensGN=IGHV4-59PE=1SV=2;sp|P0DP08|HVD82_HUMANImmunoglobulinheavyvariable4-38-2OS=HomosapiensGN=IGHV4-38-2PE=3SV=1;sp|P0DP06|HVD34_HUMANImmunoglobulinheavyvariable4-30-4OS=HomosapiensGN=IGHV4-30-4PE=3SV=1;sp|A0A0C4DH41|HV461_HUMANImmunoglobulinheavyvar…	sp|P06331|HV434_HUMANImmunoglobulinheavyvariable4-34OS=HomosapiensGN=IGHV4-34PE=1SV=2;sp|P01825|HV459_HUMANImmunoglobulinheavyvariable4-59OS=HomosapiensGN=IGHV4-59PE=1SV=2;sp|P0DP08|HVD82_HUMANImmunoglobulinheavyvariable4-38-2OS=HomosapiensGN=IGHV4-38-2PE=3SV=1;sp|P0DP06|HVD34_HUMANImmunoglobulinheavyvariable4-30-4OS=HomosapiensGN=IGHV4-30-4PE=3SV=1;sp|A0A0C4DH41|HV461_HUMANImmunoglobulinheavyvar…	3;2;2;2;2;2;1;1;1;1;1	3;2;2;2;2;2;1;1;1;1;1	3;2;2;2;2;2;1;1;1;1;1	;;;;;	11	3	3	3	1	1	1	1	0	2	1	0	1	0	0	0	1	1	0	1	1	0	0	0	0	1	1	1	1	0	2	1	0	1	0	0	0	1	1	0	1	1	0	0
sp|P06396|GELS_HUMANGelsolinOS=HomosapiensGN=GSNPE=1SV=1;tr|A0A0A0MS51|A0A0A0MS51_HUMANGelsolinOS=HomosapiensGN=GSNPE=1SV=1;tr|A0A0A0MT01|A0A0A0MT01_HUMANGelsolinOS=HomosapiensGN=GSNPE=1SV=1;CON__Q3SX14;tr|A0A0U1RQL8|A0A0U1RQL8_HUMANGelsolin(Fragment)OS=HomosapiensGN=GSNPE=1SV=1;tr|Q5T0H8|Q5T0H8_HUMANGelsolin(Fragment)OS=HomosapiensGN=GSNPE=1SV=2	sp|P06396|GELS_HUMANGelsolinOS=HomosapiensGN=GSNPE=1SV=1;tr|A0A0A0MS51|A0A0A0MS51_HUMANGelsolinOS=HomosapiensGN=GSNPE=1SV=1;tr|A0A0A0MT01|A0A0A0MT01_HUMANGelsolinOS=HomosapiensGN=GSNPE=1SV=1	36;35;35;16;5;1	36;35;35;16;5;1	31;30;30;11;0;1	;;	6	36	36	31	15	9	12	15	2	19	8	0	13	7	10	15	12	15	2	24	23	6	4	5	2	15	9	12	15	2	19	8	0	13	7	10	15	12	15	2	24	23	6	4
sp|P06576|ATPB_HUMANATPsynthasesubunitbeta,mitochondrialOS=HomosapiensGN=ATP5BPE=1SV=3;tr|H0YH81|H0YH81_HUMANATPsynthasesubunitbeta(Fragment)OS=HomosapiensGN=ATP5BPE=1SV=1;tr|F8W079|F8W079_HUMANATPsynthasesubunitbeta,mitochondrial(Fragment)OS=HomosapiensGN=ATP5BPE=1SV=1	sp|P06576|ATPB_HUMANATPsynthasesubunitbeta,mitochondrialOS=HomosapiensGN=ATP5BPE=1SV=3;tr|H0YH81|H0YH81_HUMANATPsynthasesubunitbeta(Fragment)OS=HomosapiensGN=ATP5BPE=1SV=1;tr|F8W079|F8W079_HUMANATPsynthasesubunitbeta,mitochondrial(Fragment)OS=HomosapiensGN=ATP5BPE=1SV=1	6;5;3	6;5;3	6;5;3	;;	3	6	6	6	2	0	3	2	3	3	4	2	5	5	1	3	1	4	1	0	0	0	0	0	0	2	0	3	2	3	3	4	2	5	5	1	3	1	4	1	0	0	0	0
tr|A0A0G2JIE7|A0A0G2JIE7_HUMANComplementC2OS=HomosapiensGN=C2PE=1SV=1;tr|H0Y3H6|H0Y3H6_HUMANComplementC2(Fragment)OS=HomosapiensGN=C2PE=1SV=1;tr|A0A0G2JL69|A0A0G2JL69_HUMANComplementC2OS=HomosapiensGN=C2PE=1SV=1;sp|P06681|CO2_HUMANComplementC2OS=HomosapiensGN=C2PE=1SV=2;tr|B4DQI1|B4DQI1_HUMANComplementC2OS=HomosapiensGN=C2PE=1SV=1	tr|A0A0G2JIE7|A0A0G2JIE7_HUMANComplementC2OS=HomosapiensGN=C2PE=1SV=1;tr|H0Y3H6|H0Y3H6_HUMANComplementC2(Fragment)OS=HomosapiensGN=C2PE=1SV=1;tr|A0A0G2JL69|A0A0G2JL69_HUMANComplementC2OS=HomosapiensGN=C2PE=1SV=1;sp|P06681|CO2_HUMANComplementC2OS=HomosapiensGN=C2PE=1SV=2;tr|B4DQI1|B4DQI1_HUMANComplementC2OS=HomosapiensGN=C2PE=1SV=1	9;9;9;9;7	2;2;2;2;2	2;2;2;2;2	;;;;	5	9	2	2	4	2	2	3	0	1	2	0	4	1	1	4	2	3	0	2	6	0	0	0	0	0	0	0	0	0	0	0	0	1	0	0	0	0	0	0	1	1	0	0
sp|P06702|S10A9_HUMANProteinS100-A9OS=HomosapiensGN=S100A9PE=1SV=1	sp|P06702|S10A9_HUMANProteinS100-A9OS=HomosapiensGN=S100A9PE=1SV=1	12	12	12		1	12	12	12	5	5	7	7	1	3	1	0	3	0	6	6	4	4	7	2	1	7	6	9	6	5	5	7	7	1	3	1	0	3	0	6	6	4	4	7	2	1	7	6
sp|P06703|S10A6_HUMANProteinS100-A6OS=HomosapiensGN=S100A6PE=1SV=1;tr|R4GN98|R4GN98_HUMANProteinS100(Fragment)OS=HomosapiensGN=S100A6PE=1SV=1	sp|P06703|S10A6_HUMANProteinS100-A6OS=HomosapiensGN=S100A6PE=1SV=1;tr|R4GN98|R4GN98_HUMANProteinS100(Fragment)OS=HomosapiensGN=S100A6PE=1SV=1	9;8	9;8	9;8	;	2	9	9	9	1	1	2	2	1	5	4	0	1	1	1	0	0	0	0	5	1	0	0	3	0	1	1	2	2	1	5	4	0	1	1	1	0	0	0	0	5	1	0	0
sp|P06727|APOA4_HUMANApolipoproteinA-IVOS=HomosapiensGN=APOA4PE=1SV=3;CON__Q32PJ2	sp|P06727|APOA4_HUMANApolipoproteinA-IVOS=HomosapiensGN=APOA4PE=1SV=3	31;1	31;1	31;1		2	31	31	31	17	12	13	17	1	5	3	0	8	2	12	15	19	15	0	18	12	1	0	4	1	17	12	13	17	1	5	3	0	8	2	12	15	19	15	0	18	12	1	0
tr|A0A024R0K5|A0A024R0K5_HUMANCarcinoembryonicantigen-relatedcelladhesionmolecule5OS=HomosapiensGN=CEACAM5PE=1SV=1;sp|P06731|CEAM5_HUMANCarcinoembryonicantigen-relatedcelladhesionmolecule5OS=HomosapiensGN=CEACAM5PE=1SV=3;tr|A0A087WYX0|A0A087WYX0_HUMANCarcinoembryonicantigen-relatedcelladhesionmolecule5OS=HomosapiensGN=CEACAM5PE=1SV=1;tr|T2HUW8|T2HUW8_HUMANCarcinoembryonicantigen-relatedcelladhesi…	tr|A0A024R0K5|A0A024R0K5_HUMANCarcinoembryonicantigen-relatedcelladhesionmolecule5OS=HomosapiensGN=CEACAM5PE=1SV=1;sp|P06731|CEAM5_HUMANCarcinoembryonicantigen-relatedcelladhesionmolecule5OS=HomosapiensGN=CEACAM5PE=1SV=3;tr|A0A087WYX0|A0A087WYX0_HUMANCarcinoembryonicantigen-relatedcelladhesionmolecule5OS=HomosapiensGN=CEACAM5PE=1SV=1	3;3;2;1;1	3;3;2;1;1	2;2;1;1;0	;;	5	3	3	2	1	0	1	1	1	2	0	0	1	0	1	1	0	0	0	2	2	0	0	1	0	1	0	1	1	1	2	0	0	1	0	1	1	0	0	0	2	2	0	0
sp|P06733|ENOA_HUMANAlpha-enolaseOS=HomosapiensGN=ENO1PE=1SV=2;tr|K7EM90|K7EM90_HUMANAlpha-enolase(Fragment)OS=HomosapiensGN=ENO1PE=1SV=1;tr|K7ERS8|K7ERS8_HUMANAlpha-enolase(Fragment)OS=HomosapiensGN=ENO1PE=1SV=8;tr|F5H1C3|F5H1C3_HUMANGamma-enolase(Fragment)OS=HomosapiensGN=ENO2PE=1SV=1;tr|E5RI09|E5RI09_HUMANBeta-enolase(Fragment)OS=HomosapiensGN=ENO3PE=1SV=1;tr|E5RG95|E5RG95_HUMANBeta-enolase(Fr…	sp|P06733|ENOA_HUMANAlpha-enolaseOS=HomosapiensGN=ENO1PE=1SV=2	28;12;1;1;1;1;1;1;1;1;1;1	28;12;1;1;1;1;1;1;1;1;1;1	28;12;1;1;1;1;1;1;1;1;1;1		12	28	28	28	11	10	12	11	5	18	18	5	17	11	6	9	5	7	3	16	8	2	1	3	0	11	10	12	11	5	18	18	5	17	11	6	9	5	7	3	16	8	2	1
tr|E9PK47|E9PK47_HUMANAlpha-1,4glucanphosphorylaseOS=HomosapiensGN=PYGLPE=1SV=1;sp|P06737|PYGL_HUMANGlycogenphosphorylase,liverformOS=HomosapiensGN=PYGLPE=1SV=4	tr|E9PK47|E9PK47_HUMANAlpha-1,4glucanphosphorylaseOS=HomosapiensGN=PYGLPE=1SV=1;sp|P06737|PYGL_HUMANGlycogenphosphorylase,liverformOS=HomosapiensGN=PYGLPE=1SV=4	23;23	23;23	17;17	;	2	23	23	17	13	11	9	9	4	17	4	0	14	2	7	9	2	8	1	1	0	2	1	1	2	13	11	9	9	4	17	4	0	14	2	7	9	2	8	1	1	0	2	1
sp|P06744|G6PI_HUMANGlucose-6-phosphateisomeraseOS=HomosapiensGN=GPIPE=1SV=4;tr|A0A0A0MTS2|A0A0A0MTS2_HUMANGlucose-6-phosphateisomerase(Fragment)OS=HomosapiensGN=GPIPE=1SV=1;tr|K7EQ48|K7EQ48_HUMANGlucose-6-phosphateisomeraseOS=HomosapiensGN=GPIPE=1SV=2;tr|A0A0J9YXP8|A0A0J9YXP8_HUMANGlucose-6-phosphateisomerase(Fragment)OS=HomosapiensGN=GPIPE=1SV=1;tr|A0A0J9YX90|A0A0J9YX90_HUMANGlucose-6-phosphate…	sp|P06744|G6PI_HUMANGlucose-6-phosphateisomeraseOS=HomosapiensGN=GPIPE=1SV=4;tr|A0A0A0MTS2|A0A0A0MTS2_HUMANGlucose-6-phosphateisomerase(Fragment)OS=HomosapiensGN=GPIPE=1SV=1;tr|K7EQ48|K7EQ48_HUMANGlucose-6-phosphateisomeraseOS=HomosapiensGN=GPIPE=1SV=2;tr|A0A0J9YXP8|A0A0J9YXP8_HUMANGlucose-6-phosphateisomerase(Fragment)OS=HomosapiensGN=GPIPE=1SV=1;tr|A0A0J9YX90|A0A0J9YX90_HUMANGlucose-6-phosphate…	20;19;17;13;12;12;8;7;6;4;3;3;2;2;1	20;19;17;13;12;12;8;7;6;4;3;3;2;2;1	20;19;17;13;12;12;8;7;6;4;3;3;2;2;1	;;;;;	15	20	20	20	6	5	8	4	3	18	5	0	18	5	1	6	1	7	1	3	1	1	1	4	1	6	5	8	4	3	18	5	0	18	5	1	6	1	7	1	3	1	1	1
tr|E5RGW4|E5RGW4_HUMANNucleophosmin(Fragment)OS=HomosapiensGN=NPM1PE=1SV=1;sp|P06748|NPM_HUMANNucleophosminOS=HomosapiensGN=NPM1PE=1SV=2	tr|E5RGW4|E5RGW4_HUMANNucleophosmin(Fragment)OS=HomosapiensGN=NPM1PE=1SV=1;sp|P06748|NPM_HUMANNucleophosminOS=HomosapiensGN=NPM1PE=1SV=2	1;1	1;1	1;1	;	2	1	1	1	1	1	1	1	0	0	0	0	0	0	1	1	1	1	0	0	0	0	0	0	0	1	1	1	1	0	0	0	0	0	0	1	1	1	1	0	0	0	0	0
sp|P06858|LIPL_HUMANLipoproteinlipaseOS=HomosapiensGN=LPLPE=1SV=1	sp|P06858|LIPL_HUMANLipoproteinlipaseOS=HomosapiensGN=LPLPE=1SV=1	2	2	2		1	2	2	2	1	0	1	2	0	0	0	0	0	0	1	1	0	1	0	0	0	0	0	0	0	1	0	1	2	0	0	0	0	0	0	1	1	0	1	0	0	0	0	0
sp|P07099|HYEP_HUMANEpoxidehydrolase1OS=HomosapiensGN=EPHX1PE=1SV=1;tr|B1AQP8|B1AQP8_HUMANEpoxidehydrolase1(Fragment)OS=HomosapiensGN=EPHX1PE=1SV=1;tr|B1AQP9|B1AQP9_HUMANEpoxidehydrolase1(Fragment)OS=HomosapiensGN=EPHX1PE=1SV=1	sp|P07099|HYEP_HUMANEpoxidehydrolase1OS=HomosapiensGN=EPHX1PE=1SV=1;tr|B1AQP8|B1AQP8_HUMANEpoxidehydrolase1(Fragment)OS=HomosapiensGN=EPHX1PE=1SV=1;tr|B1AQP9|B1AQP9_HUMANEpoxidehydrolase1(Fragment)OS=HomosapiensGN=EPHX1PE=1SV=1	2;1;1	2;1;1	2;1;1	;;	3	2	2	2	0	0	0	0	0	0	0	0	0	0	0	0	0	2	1	0	0	0	0	0	0	0	0	0	0	0	0	0	0	0	0	0	0	0	2	1	0	0	0	0
sp|P07195|LDHB_HUMANL-lactatedehydrogenaseBchainOS=HomosapiensGN=LDHBPE=1SV=2;tr|A8MW50|A8MW50_HUMANL-lactatedehydrogenase(Fragment)OS=HomosapiensGN=LDHBPE=1SV=1;tr|C9J7H8|C9J7H8_HUMANL-lactatedehydrogenaseBchain(Fragment)OS=HomosapiensGN=LDHBPE=1SV=8;tr|F5H793|F5H793_HUMANL-lactatedehydrogenaseBchain(Fragment)OS=HomosapiensGN=LDHBPE=1SV=1;tr|F5H5G7|F5H5G7_HUMANL-lactatedehydrogenaseOS=Homosapien…	sp|P07195|LDHB_HUMANL-lactatedehydrogenaseBchainOS=HomosapiensGN=LDHBPE=1SV=2;tr|A8MW50|A8MW50_HUMANL-lactatedehydrogenase(Fragment)OS=HomosapiensGN=LDHBPE=1SV=1	16;9;6;5;1;1;1;1;1	14;7;5;5;0;0;0;0;0	14;7;5;5;0;0;0;0;0	;	9	16	14	14	10	7	9	8	7	15	12	2	11	8	3	8	6	9	1	10	5	1	2	3	0	9	6	8	7	6	13	10	1	9	7	3	7	5	8	1	8	4	1	2
tr|A0A087WUQ6|A0A087WUQ6_HUMANGlutathioneperoxidaseOS=HomosapiensGN=GPX1PE=1SV=1;sp|P07203|GPX1_HUMANGlutathioneperoxidase1OS=HomosapiensGN=GPX1PE=1SV=4	tr|A0A087WUQ6|A0A087WUQ6_HUMANGlutathioneperoxidaseOS=HomosapiensGN=GPX1PE=1SV=1;sp|P07203|GPX1_HUMANGlutathioneperoxidase1OS=HomosapiensGN=GPX1PE=1SV=4	5;5	5;5	5;5	;	2	5	5	5	1	1	1	0	0	2	2	0	0	0	2	3	0	3	0	1	1	1	0	0	0	1	1	1	0	0	2	2	0	0	0	2	3	0	3	0	1	1	1	0
sp|P07225|PROS_HUMANVitaminK-dependentproteinSOS=HomosapiensGN=PROS1PE=1SV=1;tr|G5E9F8|G5E9F8_HUMANProteinS(Alpha),isoformCRA_bOS=HomosapiensGN=PROS1PE=1SV=1;tr|H7BXT0|H7BXT0_HUMANVitaminK-dependentproteinS(Fragment)OS=HomosapiensGN=PROS1PE=1SV=1;tr|C9K0R0|C9K0R0_HUMANVitaminK-dependentproteinS(Fragment)OS=HomosapiensGN=PROS1PE=1SV=1;CON__P07224	sp|P07225|PROS_HUMANVitaminK-dependentproteinSOS=HomosapiensGN=PROS1PE=1SV=1;tr|G5E9F8|G5E9F8_HUMANProteinS(Alpha),isoformCRA_bOS=HomosapiensGN=PROS1PE=1SV=1	14;13;3;1;1	14;13;3;1;1	14;13;3;1;1	;	5	14	14	14	6	3	4	1	2	1	0	0	1	0	4	4	13	5	1	3	3	0	0	1	0	6	3	4	1	2	1	0	0	1	0	4	4	13	5	1	3	3	0	0
sp|P07237|PDIA1_HUMANProteindisulfide-isomeraseOS=HomosapiensGN=P4HBPE=1SV=3;tr|H0Y3Z3|H0Y3Z3_HUMANProteindisulfide-isomerase(Fragment)OS=HomosapiensGN=P4HBPE=1SV=1;tr|H7BZ94|H7BZ94_HUMANProteindisulfide-isomeraseOS=HomosapiensGN=P4HBPE=1SV=2;tr|I3L398|I3L398_HUMANProteindisulfide-isomerase(Fragment)OS=HomosapiensGN=P4HBPE=1SV=1;tr|I3L4M2|I3L4M2_HUMANProteindisulfide-isomerase(Fragment)OS=Homosap…	sp|P07237|PDIA1_HUMANProteindisulfide-isomeraseOS=HomosapiensGN=P4HBPE=1SV=3;tr|H0Y3Z3|H0Y3Z3_HUMANProteindisulfide-isomerase(Fragment)OS=HomosapiensGN=P4HBPE=1SV=1;tr|H7BZ94|H7BZ94_HUMANProteindisulfide-isomeraseOS=HomosapiensGN=P4HBPE=1SV=2	7;6;6;3;1;1;1;1	7;6;6;3;1;1;1;1	7;6;6;3;1;1;1;1	;;	8	7	7	7	3	1	2	3	1	2	1	0	2	1	3	4	2	4	1	0	0	0	0	0	1	3	1	2	3	1	2	1	0	2	1	3	4	2	4	1	0	0	0	0
sp|P07305|H10_HUMANHistoneH1.0OS=HomosapiensGN=H1F0PE=1SV=3	sp|P07305|H10_HUMANHistoneH1.0OS=HomosapiensGN=H1F0PE=1SV=3	2	2	2		1	2	2	2	0	1	1	2	0	0	0	0	0	0	2	0	0	2	0	0	0	0	0	0	0	0	1	1	2	0	0	0	0	0	0	2	0	0	2	0	0	0	0	0
tr|H7C469|H7C469_HUMANUncharacterizedprotein(Fragment)OS=HomosapiensPE=1SV=7;tr|A0A1B0GW44|A0A1B0GW44_HUMANCathepsinDOS=HomosapiensGN=CTSDPE=1SV=1;tr|A0A1B0GV23|A0A1B0GV23_HUMANCathepsinDOS=HomosapiensGN=CTSDPE=1SV=1;tr|A0A1B0GVD5|A0A1B0GVD5_HUMANCathepsinDOS=HomosapiensGN=CTSDPE=1SV=1;tr|A0A1B0GWE8|A0A1B0GWE8_HUMANCathepsinDOS=HomosapiensGN=CTSDPE=1SV=1;sp|P07339|CATD_HUMANCathepsinDOS=Homosapie…	tr|H7C469|H7C469_HUMANUncharacterizedprotein(Fragment)OS=HomosapiensPE=1SV=7;tr|A0A1B0GW44|A0A1B0GW44_HUMANCathepsinDOS=HomosapiensGN=CTSDPE=1SV=1;tr|A0A1B0GV23|A0A1B0GV23_HUMANCathepsinDOS=HomosapiensGN=CTSDPE=1SV=1;tr|A0A1B0GVD5|A0A1B0GVD5_HUMANCathepsinDOS=HomosapiensGN=CTSDPE=1SV=1;tr|A0A1B0GWE8|A0A1B0GWE8_HUMANCathepsinDOS=HomosapiensGN=CTSDPE=1SV=1;sp|P07339|CATD_HUMANCathepsinDOS=Homosapie…	4;4;4;4;4;4;4;4;2;2;2;2;2	4;4;4;4;4;4;4;4;2;2;2;2;2	4;4;4;4;4;4;4;4;2;2;2;2;2	;;;;;;;;;;;;	13	4	4	4	2	2	2	2	1	2	3	0	3	2	0	2	1	2	0	1	1	0	0	0	0	2	2	2	2	1	2	3	0	3	2	0	2	1	2	0	1	1	0	0
sp|P07355|ANXA2_HUMANAnnexinA2OS=HomosapiensGN=ANXA2PE=1SV=2;tr|H0YN42|H0YN42_HUMANAnnexin(Fragment)OS=HomosapiensGN=ANXA2PE=1SV=1;tr|H0YMD0|H0YMD0_HUMANAnnexin(Fragment)OS=HomosapiensGN=ANXA2PE=1SV=1;tr|H0YMU9|H0YMU9_HUMANAnnexinOS=HomosapiensGN=ANXA2PE=1SV=1;sp|A6NMY6|AXA2L_HUMANPutativeannexinA2-likeproteinOS=HomosapiensGN=ANXA2P2PE=5SV=2;tr|H0YM50|H0YM50_HUMANAnnexin(Fragment)OS=HomosapiensGN…	sp|P07355|ANXA2_HUMANAnnexinA2OS=HomosapiensGN=ANXA2PE=1SV=2;tr|H0YN42|H0YN42_HUMANAnnexin(Fragment)OS=HomosapiensGN=ANXA2PE=1SV=1;tr|H0YMD0|H0YMD0_HUMANAnnexin(Fragment)OS=HomosapiensGN=ANXA2PE=1SV=1;tr|H0YMU9|H0YMU9_HUMANAnnexinOS=HomosapiensGN=ANXA2PE=1SV=1;sp|A6NMY6|AXA2L_HUMANPutativeannexinA2-likeproteinOS=HomosapiensGN=ANXA2P2PE=5SV=2;tr|H0YM50|H0YM50_HUMANAnnexin(Fragment)OS=HomosapiensGN…	33;30;26;26;23;22;19;18;17;17;16;13;13;13;13;11;11;11;8;8;6;6;5;3	33;30;26;26;23;22;19;18;17;17;16;13;13;13;13;11;11;11;8;8;6;6;5;3	33;30;26;26;23;22;19;18;17;17;16;13;13;13;13;11;11;11;8;8;6;6;5;3	;;;;;;;;;	24	33	33	33	22	19	22	23	14	21	25	4	15	23	10	13	15	12	2	20	4	8	4	8	0	22	19	22	23	14	21	25	4	15	23	10	13	15	12	2	20	4	8	4
sp|P07357|CO8A_HUMANComplementcomponentC8alphachainOS=HomosapiensGN=C8APE=1SV=2	sp|P07357|CO8A_HUMANComplementcomponentC8alphachainOS=HomosapiensGN=C8APE=1SV=2	9	9	9		1	9	9	9	1	1	1	2	1	0	1	0	0	1	0	1	5	1	0	6	7	0	1	0	0	1	1	1	2	1	0	1	0	0	1	0	1	5	1	0	6	7	0	1
sp|P07358|CO8B_HUMANComplementcomponentC8betachainOS=HomosapiensGN=C8BPE=1SV=3;tr|F5GY80|F5GY80_HUMANComplementcomponentC8betachainOS=HomosapiensGN=C8BPE=1SV=1;tr|F5H7G1|F5H7G1_HUMANComplementcomponentC8betachainOS=HomosapiensGN=C8BPE=1SV=1	sp|P07358|CO8B_HUMANComplementcomponentC8betachainOS=HomosapiensGN=C8BPE=1SV=3;tr|F5GY80|F5GY80_HUMANComplementcomponentC8betachainOS=HomosapiensGN=C8BPE=1SV=1;tr|F5H7G1|F5H7G1_HUMANComplementcomponentC8betachainOS=HomosapiensGN=C8BPE=1SV=1	12;11;11	12;11;11	12;11;11	;;	3	12	12	12	5	1	5	5	0	3	0	0	4	0	2	3	9	4	0	3	4	0	0	0	0	5	1	5	5	0	3	0	0	4	0	2	3	9	4	0	3	4	0	0
sp|P07360|CO8G_HUMANComplementcomponentC8gammachainOS=HomosapiensGN=C8GPE=1SV=3	sp|P07360|CO8G_HUMANComplementcomponentC8gammachainOS=HomosapiensGN=C8GPE=1SV=3	4	4	4		1	4	4	4	2	1	2	2	0	0	0	0	0	0	0	0	4	1	0	3	2	0	0	0	0	2	1	2	2	0	0	0	0	0	0	0	0	4	1	0	3	2	0	0
sp|P07384|CAN1_HUMANCalpain-1catalyticsubunitOS=HomosapiensGN=CAPN1PE=1SV=1;tr|E9PIA9|E9PIA9_HUMANCalpain-1catalyticsubunit(Fragment)OS=HomosapiensGN=CAPN1PE=1SV=1;tr|E9PLX0|E9PLX0_HUMANCalpain-1catalyticsubunit(Fragment)OS=HomosapiensGN=CAPN1PE=1SV=1;tr|E9PJJ3|E9PJJ3_HUMANCalpain-1catalyticsubunit(Fragment)OS=HomosapiensGN=CAPN1PE=1SV=8;tr|E9PLC9|E9PLC9_HUMANCalpain-1catalyticsubunit(Fragment)OS…	sp|P07384|CAN1_HUMANCalpain-1catalyticsubunitOS=HomosapiensGN=CAPN1PE=1SV=1	3;1;1;1;1;1;1;1;1;1	3;1;1;1;1;1;1;1;1;1	3;1;1;1;1;1;1;1;1;1		10	3	3	3	3	1	2	2	0	2	1	0	1	1	0	1	1	1	0	1	1	0	1	0	0	3	1	2	2	0	2	1	0	1	1	0	1	1	1	0	1	1	0	1
tr|Q5JP53|Q5JP53_HUMANTubulinbetachainOS=HomosapiensGN=TUBBPE=1SV=1;sp|P07437|TBB5_HUMANTubulinbetachainOS=HomosapiensGN=TUBBPE=1SV=2;tr|Q5ST81|Q5ST81_HUMANTubulinbetachainOS=HomosapiensGN=TUBBPE=1SV=1;tr|G3V5W4|G3V5W4_HUMANTubulinbeta-3chainOS=HomosapiensGN=TUBB3PE=1SV=1;tr|G3V2R8|G3V2R8_HUMANHCG1983504,isoformCRA_eOS=HomosapiensGN=TUBB3PE=1SV=1;tr|G3V3R4|G3V3R4_HUMANHCG1983504,isoformCRA_cOS=Ho…	tr|Q5JP53|Q5JP53_HUMANTubulinbetachainOS=HomosapiensGN=TUBBPE=1SV=1;sp|P07437|TBB5_HUMANTubulinbetachainOS=HomosapiensGN=TUBBPE=1SV=2;tr|Q5ST81|Q5ST81_HUMANTubulinbetachainOS=HomosapiensGN=TUBBPE=1SV=1	31;31;28;1;1;1;1	5;5;2;1;1;1;1	4;4;2;0;0;0;0	;;	7	31	5	4	18	12	19	19	6	30	24	8	25	20	7	9	6	13	2	12	8	2	0	1	1	3	2	3	3	1	5	5	2	5	5	1	2	1	2	0	1	1	1	0
tr|Q5BJH1|Q5BJH1_HUMANPSAPproteinOS=HomosapiensGN=PSAPPE=1SV=1;sp|P07602|SAP_HUMANProsaposinOS=HomosapiensGN=PSAPPE=1SV=2;tr|C9JIZ6|C9JIZ6_HUMANProsaposinOS=HomosapiensGN=PSAPPE=1SV=2	tr|Q5BJH1|Q5BJH1_HUMANPSAPproteinOS=HomosapiensGN=PSAPPE=1SV=1;sp|P07602|SAP_HUMANProsaposinOS=HomosapiensGN=PSAPPE=1SV=2;tr|C9JIZ6|C9JIZ6_HUMANProsaposinOS=HomosapiensGN=PSAPPE=1SV=2	2;2;2	2;2;2	2;2;2	;;	3	2	2	2	2	1	2	2	0	0	0	0	0	1	0	1	1	2	0	0	0	0	0	0	0	2	1	2	2	0	0	0	0	0	1	0	1	1	2	0	0	0	0	0
sp|P07737|PROF1_HUMANProfilin-1OS=HomosapiensGN=PFN1PE=1SV=2;tr|K7EJ44|K7EJ44_HUMANProfilinOS=HomosapiensGN=PFN1PE=1SV=1;CON__P02584;tr|I3L3D5|I3L3D5_HUMANProfilin(Fragment)OS=HomosapiensGN=PFN1PE=1SV=1	sp|P07737|PROF1_HUMANProfilin-1OS=HomosapiensGN=PFN1PE=1SV=2;tr|K7EJ44|K7EJ44_HUMANProfilinOS=HomosapiensGN=PFN1PE=1SV=1	15;11;4;4	15;11;4;4	15;11;4;4	;	4	15	15	15	7	9	9	9	6	14	10	0	12	10	5	7	4	6	3	5	5	2	1	1	0	7	9	9	9	6	14	10	0	12	10	5	7	4	6	3	5	5	2	1
sp|P07814|SYEP_HUMANBifunctionalglutamate/proline--tRNAligaseOS=HomosapiensGN=EPRSPE=1SV=5;tr|V9GYZ6|V9GYZ6_HUMANBifunctionalglutamate/proline--tRNAligase(Fragment)OS=HomosapiensGN=EPRSPE=1SV=1	sp|P07814|SYEP_HUMANBifunctionalglutamate/proline--tRNAligaseOS=HomosapiensGN=EPRSPE=1SV=5	4;1	4;1	4;1		2	4	4	4	1	0	0	0	0	1	0	0	1	0	2	1	0	3	0	2	0	1	0	1	0	1	0	0	0	0	1	0	0	1	0	2	1	0	3	0	2	0	1	0
sp|P07900|HS90A_HUMANHeatshockproteinHSP90-alphaOS=HomosapiensGN=HSP90AA1PE=1SV=5;tr|G3V2J8|G3V2J8_HUMANHeatshockproteinHSP90-alpha(Fragment)OS=HomosapiensGN=HSP90AA1PE=1SV=1;sp|Q14568|HS902_HUMANHeatshockproteinHSP90-alphaA2OS=HomosapiensGN=HSP90AA2PPE=1SV=2;sp|Q58FG0|HS905_HUMANPutativeheatshockproteinHSP90-alphaA5OS=HomosapiensGN=HSP90AA5PPE=2SV=1	sp|P07900|HS90A_HUMANHeatshockproteinHSP90-alphaOS=HomosapiensGN=HSP90AA1PE=1SV=5	47;10;8;4	47;10;8;4	29;4;2;1		4	47	47	29	24	17	21	18	11	38	23	5	35	14	20	21	15	24	4	18	11	3	3	6	3	24	17	21	18	11	38	23	5	35	14	20	21	15	24	4	18	11	3	3
sp|P07948|LYN_HUMANTyrosine-proteinkinaseLynOS=HomosapiensGN=LYNPE=1SV=3;tr|E5RJ37|E5RJ37_HUMANTyrosine-proteinkinaseLyn(Fragment)OS=HomosapiensGN=LYNPE=1SV=1	sp|P07948|LYN_HUMANTyrosine-proteinkinaseLynOS=HomosapiensGN=LYNPE=1SV=3	5;1	5;1	4;1		2	5	5	4	1	2	1	1	0	1	1	0	2	0	3	3	0	3	1	0	0	0	0	0	0	1	2	1	1	0	1	1	0	2	0	3	3	0	3	1	0	0	0	0
sp|P07988|PSPB_HUMANPulmonarysurfactant-associatedproteinBOS=HomosapiensGN=SFTPBPE=1SV=3;tr|D6W5L6|D6W5L6_HUMANPulmonarysurfactant-associatedproteinBOS=HomosapiensGN=SFTPBPE=1SV=1;tr|H0Y7V6|H0Y7V6_HUMANPulmonarysurfactant-associatedproteinB(Fragment)OS=HomosapiensGN=SFTPBPE=1SV=1;tr|U3KQT2|U3KQT2_HUMANPulmonarysurfactant-associatedproteinB(Fragment)OS=HomosapiensGN=SFTPBPE=1SV=1	sp|P07988|PSPB_HUMANPulmonarysurfactant-associatedproteinBOS=HomosapiensGN=SFTPBPE=1SV=3;tr|D6W5L6|D6W5L6_HUMANPulmonarysurfactant-associatedproteinBOS=HomosapiensGN=SFTPBPE=1SV=1;tr|H0Y7V6|H0Y7V6_HUMANPulmonarysurfactant-associatedproteinB(Fragment)OS=HomosapiensGN=SFTPBPE=1SV=1	19;19;17;3	19;19;17;3	19;19;17;3	;;	4	19	19	19	14	7	14	15	3	8	7	0	8	7	8	8	5	8	1	13	10	0	0	2	1	14	7	14	15	3	8	7	0	8	7	8	8	5	8	1	13	10	0	0
sp|P07996|TSP1_HUMANThrombospondin-1OS=HomosapiensGN=THBS1PE=1SV=2;CON__Q28194	sp|P07996|TSP1_HUMANThrombospondin-1OS=HomosapiensGN=THBS1PE=1SV=2	5;2	5;2	5;2		2	5	5	5	1	1	0	1	0	0	0	0	0	0	0	0	5	0	0	0	0	0	0	0	0	1	1	0	1	0	0	0	0	0	0	0	0	5	0	0	0	0	0	0
sp|P08133|ANXA6_HUMANAnnexinA6OS=HomosapiensGN=ANXA6PE=1SV=3;tr|E5RK69|E5RK69_HUMANAnnexinOS=HomosapiensGN=ANXA6PE=1SV=1;tr|E7EMC6|E7EMC6_HUMANAnnexinOS=HomosapiensGN=ANXA6PE=1SV=1;tr|E5RJF5|E5RJF5_HUMANAnnexin(Fragment)OS=HomosapiensGN=ANXA6PE=1SV=8;tr|E5RK63|E5RK63_HUMANAnnexin(Fragment)OS=HomosapiensGN=ANXA6PE=1SV=1;tr|E5RFF0|E5RFF0_HUMANAnnexinA6(Fragment)OS=HomosapiensGN=ANXA6PE=1SV=1;tr|E5R…	sp|P08133|ANXA6_HUMANAnnexinA6OS=HomosapiensGN=ANXA6PE=1SV=3;tr|E5RK69|E5RK69_HUMANAnnexinOS=HomosapiensGN=ANXA6PE=1SV=1;tr|E7EMC6|E7EMC6_HUMANAnnexinOS=HomosapiensGN=ANXA6PE=1SV=1	25;16;13;6;6;6;5;3;3;3	25;16;13;6;6;6;5;3;3;3	25;16;13;6;6;6;5;3;3;3	;;	10	25	25	25	18	11	20	21	3	16	5	0	13	1	3	3	2	4	3	3	1	2	1	4	3	18	11	20	21	3	16	5	0	13	1	3	3	2	4	3	3	1	2	1
tr|H3BLV0|H3BLV0_HUMANComplementdecay-acceleratingfactor(Fragment)OS=HomosapiensGN=CD55PE=1SV=1;sp|P08174|DAF_HUMANComplementdecay-acceleratingfactorOS=HomosapiensGN=CD55PE=1SV=4;tr|B1AP13|B1AP13_HUMANComplementdecay-acceleratingfactorOS=HomosapiensGN=CD55PE=1SV=1;tr|H7BY55|H7BY55_HUMANComplementdecay-acceleratingfactorOS=HomosapiensGN=CD55PE=1SV=2;tr|B1AP15|B1AP15_HUMANCD55antigen,decayaccelerat…	tr|H3BLV0|H3BLV0_HUMANComplementdecay-acceleratingfactor(Fragment)OS=HomosapiensGN=CD55PE=1SV=1;sp|P08174|DAF_HUMANComplementdecay-acceleratingfactorOS=HomosapiensGN=CD55PE=1SV=4;tr|B1AP13|B1AP13_HUMANComplementdecay-acceleratingfactorOS=HomosapiensGN=CD55PE=1SV=1;tr|H7BY55|H7BY55_HUMANComplementdecay-acceleratingfactorOS=HomosapiensGN=CD55PE=1SV=2;tr|B1AP15|B1AP15_HUMANCD55antigen,decayaccelerat…	4;4;4;4;2	4;4;4;4;2	4;4;4;4;2	;;;;	5	4	4	4	1	0	1	0	0	0	0	0	0	0	0	0	0	1	0	4	4	0	0	0	0	1	0	1	0	0	0	0	0	0	0	0	0	0	1	0	4	4	0	0
sp|P08185|CBG_HUMANCorticosteroid-bindingglobulinOS=HomosapiensGN=SERPINA6PE=1SV=1;tr|G3V4V7|G3V4V7_HUMANCorticosteroid-bindingglobulin(Fragment)OS=HomosapiensGN=SERPINA6PE=1SV=1;tr|G3V350|G3V350_HUMANCorticosteroid-bindingglobulinOS=HomosapiensGN=SERPINA6PE=1SV=1	sp|P08185|CBG_HUMANCorticosteroid-bindingglobulinOS=HomosapiensGN=SERPINA6PE=1SV=1;tr|G3V4V7|G3V4V7_HUMANCorticosteroid-bindingglobulin(Fragment)OS=HomosapiensGN=SERPINA6PE=1SV=1;tr|G3V350|G3V350_HUMANCorticosteroid-bindingglobulinOS=HomosapiensGN=SERPINA6PE=1SV=1	3;2;2	3;2;2	3;2;2	;;	3	3	3	3	2	0	1	0	0	3	0	0	3	0	0	0	0	0	0	0	0	0	0	1	0	2	0	1	0	0	3	0	0	3	0	0	0	0	0	0	0	0	0	0
tr|F5GZS6|F5GZS6_HUMAN4F2cell-surfaceantigenheavychainOS=HomosapiensGN=SLC3A2PE=1SV=1;sp|P08195|4F2_HUMAN4F2cell-surfaceantigenheavychainOS=HomosapiensGN=SLC3A2PE=1SV=3;tr|J3KPF3|J3KPF3_HUMAN4F2cell-surfaceantigenheavychainOS=HomosapiensGN=SLC3A2PE=1SV=1;tr|F5GZI0|F5GZI0_HUMAN4F2cell-surfaceantigenheavychainOS=HomosapiensGN=SLC3A2PE=1SV=1;tr|H0YFS2|H0YFS2_HUMAN4F2cell-surfaceantigenheavychain(Fra…	tr|F5GZS6|F5GZS6_HUMAN4F2cell-surfaceantigenheavychainOS=HomosapiensGN=SLC3A2PE=1SV=1;sp|P08195|4F2_HUMAN4F2cell-surfaceantigenheavychainOS=HomosapiensGN=SLC3A2PE=1SV=3;tr|J3KPF3|J3KPF3_HUMAN4F2cell-surfaceantigenheavychainOS=HomosapiensGN=SLC3A2PE=1SV=1	3;3;3;1;1	3;3;3;1;1	3;3;3;1;1	;;	5	3	3	3	2	2	2	2	0	0	1	0	0	1	3	3	1	3	0	0	0	0	0	1	0	2	2	2	2	0	0	1	0	0	1	3	3	1	3	0	0	0	0	0
sp|P08238|HS90B_HUMANHeatshockproteinHSP90-betaOS=HomosapiensGN=HSP90AB1PE=1SV=4;sp|Q58FF7|H90B3_HUMANPutativeheatshockproteinHSP90-beta-3OS=HomosapiensGN=HSP90AB3PPE=5SV=1;sp|Q58FF8|H90B2_HUMANPutativeheatshockproteinHSP90-beta2OS=HomosapiensGN=HSP90AB2PPE=1SV=2	sp|P08238|HS90B_HUMANHeatshockproteinHSP90-betaOS=HomosapiensGN=HSP90AB1PE=1SV=4	35;15;10	17;5;3	15;5;3		3	35	17	15	21	17	18	16	10	29	21	7	26	18	16	18	13	20	5	18	11	5	1	7	5	9	9	9	9	6	15	12	3	14	12	5	8	6	8	1	10	6	4	1
sp|P08246|ELNE_HUMANNeutrophilelastaseOS=HomosapiensGN=ELANEPE=1SV=1	sp|P08246|ELNE_HUMANNeutrophilelastaseOS=HomosapiensGN=ELANEPE=1SV=1	11	11	11		1	11	11	11	4	1	2	2	1	3	1	0	3	1	1	1	1	2	1	9	5	8	10	7	1	4	1	2	2	1	3	1	0	3	1	1	1	1	2	1	9	5	8	10
sp|P08263|GSTA1_HUMANGlutathioneS-transferaseA1OS=HomosapiensGN=GSTA1PE=1SV=3;tr|Q5JW85|Q5JW85_HUMANGlutathioneS-transferaseA3OS=HomosapiensGN=GSTA3PE=1SV=1;sp|Q16772|GSTA3_HUMANGlutathioneS-transferaseA3OS=HomosapiensGN=GSTA3PE=1SV=3;sp|Q7RTV2|GSTA5_HUMANGlutathioneS-transferaseA5OS=HomosapiensGN=GSTA5PE=1SV=1;tr|Q5JW84|Q5JW84_HUMANGlutathioneS-transferaseA3(Fragment)OS=HomosapiensGN=GSTA3PE=1SV…	sp|P08263|GSTA1_HUMANGlutathioneS-transferaseA1OS=HomosapiensGN=GSTA1PE=1SV=3	14;6;6;4;2	2;0;0;0;0	2;0;0;0;0		5	14	2	2	6	5	6	8	2	11	10	0	7	7	3	5	1	5	4	7	4	2	1	4	2	0	0	1	1	0	2	2	0	1	1	0	0	0	0	1	2	1	0	1
sp|P08311|CATG_HUMANCathepsinGOS=HomosapiensGN=CTSGPE=1SV=2	sp|P08311|CATG_HUMANCathepsinGOS=HomosapiensGN=CTSGPE=1SV=2	20	20	20		1	20	20	20	5	5	8	7	1	8	4	0	8	0	5	5	1	7	5	9	7	12	11	12	3	5	5	8	7	1	8	4	0	8	0	5	5	1	7	5	9	7	12	11
sp|P08473|NEP_HUMANNeprilysinOS=HomosapiensGN=MMEPE=1SV=2	sp|P08473|NEP_HUMANNeprilysinOS=HomosapiensGN=MMEPE=1SV=2	1	1	1		1	1	1	1	0	0	1	0	0	0	0	0	1	0	0	0	0	0	1	0	0	0	0	1	1	0	0	1	0	0	0	0	0	1	0	0	0	0	0	1	0	0	0	0
sp|P08514|ITA2B_HUMANIntegrinalpha-IIbOS=HomosapiensGN=ITGA2BPE=1SV=3	sp|P08514|ITA2B_HUMANIntegrinalpha-IIbOS=HomosapiensGN=ITGA2BPE=1SV=3	5	5	5		1	5	5	5	1	0	1	1	0	1	0	0	0	0	0	0	5	0	0	0	0	0	0	0	0	1	0	1	1	0	1	0	0	0	0	0	0	5	0	0	0	0	0	0
sp|P08519|APOA_HUMANApolipoprotein(a)OS=HomosapiensGN=LPAPE=1SV=1;tr|A0A087WWY0|A0A087WWY0_HUMANApolipoprotein(a)OS=HomosapiensGN=LPAPE=1SV=1	sp|P08519|APOA_HUMANApolipoprotein(a)OS=HomosapiensGN=LPAPE=1SV=1	7;2	7;2	7;2		2	7	7	7	0	1	1	1	0	0	0	0	1	0	1	1	7	1	0	0	0	0	0	0	1	0	1	1	1	0	0	0	0	1	0	1	1	7	1	0	0	0	0	0
sp|P08567|PLEK_HUMANPleckstrinOS=HomosapiensGN=PLEKPE=1SV=3	sp|P08567|PLEK_HUMANPleckstrinOS=HomosapiensGN=PLEKPE=1SV=3	1	1	1		1	1	1	1	1	0	0	0	0	0	0	0	0	0	0	0	1	0	0	0	0	0	0	0	0	1	0	0	0	0	0	0	0	0	0	0	0	1	0	0	0	0	0	0
tr|D6RFL4|D6RFL4_HUMANMonocytedifferentiationantigenCD14(Fragment)OS=HomosapiensGN=CD14PE=1SV=1;sp|P08571|CD14_HUMANMonocytedifferentiationantigenCD14OS=HomosapiensGN=CD14PE=1SV=2	tr|D6RFL4|D6RFL4_HUMANMonocytedifferentiationantigenCD14(Fragment)OS=HomosapiensGN=CD14PE=1SV=1;sp|P08571|CD14_HUMANMonocytedifferentiationantigenCD14OS=HomosapiensGN=CD14PE=1SV=2	3;3	3;3	3;3	;	2	3	3	3	2	0	1	1	0	1	1	0	2	0	1	1	0	1	0	2	2	0	0	0	0	2	0	1	1	0	1	1	0	2	0	1	1	0	1	0	2	2	0	0
sp|P08574|CY1_HUMANCytochromec1,hemeprotein,mitochondrialOS=HomosapiensGN=CYC1PE=1SV=3	sp|P08574|CY1_HUMANCytochromec1,hemeprotein,mitochondrialOS=HomosapiensGN=CYC1PE=1SV=3	1	1	1		1	1	1	1	0	0	0	0	0	0	0	0	0	0	0	1	0	1	0	0	0	0	0	0	0	0	0	0	0	0	0	0	0	0	0	0	1	0	1	0	0	0	0	0
tr|X6R433|X6R433_HUMANTyrosine-proteinphosphataseOS=HomosapiensGN=PTPRCPE=1SV=1;sp|P08575|PTPRC_HUMANReceptor-typetyrosine-proteinphosphataseCOS=HomosapiensGN=PTPRCPE=1SV=2;tr|A0A0A0MT22|A0A0A0MT22_HUMANTyrosine-proteinphosphataseOS=HomosapiensGN=PTPRCPE=1SV=1;tr|M3ZCP1|M3ZCP1_HUMANTyrosine-proteinphosphatase(Fragment)OS=HomosapiensGN=PTPRCPE=1SV=1;tr|A0A075B788|A0A075B788_HUMANTyrosine-proteinph…	tr|X6R433|X6R433_HUMANTyrosine-proteinphosphataseOS=HomosapiensGN=PTPRCPE=1SV=1;sp|P08575|PTPRC_HUMANReceptor-typetyrosine-proteinphosphataseCOS=HomosapiensGN=PTPRCPE=1SV=2;tr|A0A0A0MT22|A0A0A0MT22_HUMANTyrosine-proteinphosphataseOS=HomosapiensGN=PTPRCPE=1SV=1;tr|M3ZCP1|M3ZCP1_HUMANTyrosine-proteinphosphatase(Fragment)OS=HomosapiensGN=PTPRCPE=1SV=1;tr|A0A075B788|A0A075B788_HUMANTyrosine-proteinph…	10;10;10;9;9;7;5;5;5	10;10;10;9;9;7;5;5;5	10;10;10;9;9;7;5;5;5	;;;;;;;;	9	10	10	10	2	2	1	0	0	1	0	0	1	0	6	6	0	8	1	0	0	1	0	0	1	2	2	1	0	0	1	0	0	1	0	6	6	0	8	1	0	0	1	0
sp|P08603|CFAH_HUMANComplementfactorHOS=HomosapiensGN=CFHPE=1SV=4;tr|A0A087WYK9|A0A087WYK9_HUMANComplementfactorH-relatedprotein3OS=HomosapiensGN=CFHR3PE=1SV=1;tr|Q6NSD3|Q6NSD3_HUMANCFHR3proteinOS=HomosapiensGN=CFHR3PE=1SV=1;sp|Q02985|FHR3_HUMANComplementfactorH-relatedprotein3OS=HomosapiensGN=CFHR3PE=1SV=2	sp|P08603|CFAH_HUMANComplementfactorHOS=HomosapiensGN=CFHPE=1SV=4	45;1;1;1	45;1;1;1	16;1;1;1		4	45	45	16	3	2	6	6	1	3	0	0	1	1	3	2	37	6	0	15	24	2	2	0	0	3	2	6	6	1	3	0	0	1	1	3	2	37	6	0	15	24	2	2
tr|C9JC71|C9JC71_HUMANLowaffinityimmunoglobulingammaFcregionreceptorIII-A(Fragment)OS=HomosapiensGN=FCGR3APE=1SV=1;sp|P08637|FCG3A_HUMANLowaffinityimmunoglobulingammaFcregionreceptorIII-AOS=HomosapiensGN=FCGR3APE=1SV=2;tr|A0A1W2PQB1|A0A1W2PQB1_HUMANFcofIgGlowaffinityIIIareceptorisoform1OS=HomosapiensGN=FCGR3APE=1SV=1;tr|H0Y755|H0Y755_HUMANLowaffinityimmunoglobulingammaFcregionreceptorIII-A(Fragme…	tr|C9JC71|C9JC71_HUMANLowaffinityimmunoglobulingammaFcregionreceptorIII-A(Fragment)OS=HomosapiensGN=FCGR3APE=1SV=1;sp|P08637|FCG3A_HUMANLowaffinityimmunoglobulingammaFcregionreceptorIII-AOS=HomosapiensGN=FCGR3APE=1SV=2;tr|A0A1W2PQB1|A0A1W2PQB1_HUMANFcofIgGlowaffinityIIIareceptorisoform1OS=HomosapiensGN=FCGR3APE=1SV=1;tr|H0Y755|H0Y755_HUMANLowaffinityimmunoglobulingammaFcregionreceptorIII-A(Fragme…	2;2;2;2;2	2;2;2;2;2	2;2;2;2;2	;;;;	5	2	2	2	1	0	1	1	0	0	0	0	0	0	0	0	0	0	0	2	2	0	0	0	0	1	0	1	1	0	0	0	0	0	0	0	0	0	0	0	2	2	0	0
sp|P08670|VIME_HUMANVimentinOS=HomosapiensGN=VIMPE=1SV=4;tr|B0YJC4|B0YJC4_HUMANVimentinOS=HomosapiensGN=VIMPE=1SV=1;tr|B0YJC5|B0YJC5_HUMANVimentinOS=HomosapiensGN=VIMPE=1SV=1;tr|A0A1B0GTT5|A0A1B0GTT5_HUMANVimentin(Fragment)OS=HomosapiensGN=VIMPE=1SV=1;tr|A0A1B0GVG8|A0A1B0GVG8_HUMANVimentin(Fragment)OS=HomosapiensGN=VIMPE=1SV=1;tr|H7C5W5|H7C5W5_HUMANPeripherin(Fragment)OS=HomosapiensGN=PRPHPE=1SV=…	sp|P08670|VIME_HUMANVimentinOS=HomosapiensGN=VIMPE=1SV=4;tr|B0YJC4|B0YJC4_HUMANVimentinOS=HomosapiensGN=VIMPE=1SV=1	61;57;30;14;6;5;5;5;2;2;2;2;2	61;57;30;14;6;5;5;5;2;2;2;2;2	59;55;28;14;6;4;4;3;2;1;1;1;1	;	13	61	61	59	42	20	27	29	8	29	53	0	17	45	17	20	22	28	3	10	0	2	1	6	1	42	20	27	29	8	29	53	0	17	45	17	20	22	28	3	10	0	2	1
sp|P08697|A2AP_HUMANAlpha-2-antiplasminOS=HomosapiensGN=SERPINF2PE=1SV=3;tr|A0A0G2JPA8|A0A0G2JPA8_HUMANAlpha-2-antiplasminOS=HomosapiensGN=SERPINF2PE=1SV=1;tr|C9JMH6|C9JMH6_HUMANAlpha-2-antiplasmin(Fragment)OS=HomosapiensGN=SERPINF2PE=1SV=1;tr|A0A0J9YY65|A0A0J9YY65_HUMANAlpha-2-antiplasmin(Fragment)OS=HomosapiensGN=SERPINF2PE=1SV=1;tr|C9JPV4|C9JPV4_HUMANAlpha-2-antiplasmin(Fragment)OS=Homosapiens…	sp|P08697|A2AP_HUMANAlpha-2-antiplasminOS=HomosapiensGN=SERPINF2PE=1SV=3;tr|A0A0G2JPA8|A0A0G2JPA8_HUMANAlpha-2-antiplasminOS=HomosapiensGN=SERPINF2PE=1SV=1;tr|C9JMH6|C9JMH6_HUMANAlpha-2-antiplasmin(Fragment)OS=HomosapiensGN=SERPINF2PE=1SV=1;tr|A0A0J9YY65|A0A0J9YY65_HUMANAlpha-2-antiplasmin(Fragment)OS=HomosapiensGN=SERPINF2PE=1SV=1	7;6;4;4;3;3	7;6;4;4;3;3	7;6;4;4;3;3	;;;	6	7	7	7	3	1	2	1	0	2	1	0	3	0	1	2	5	3	0	2	0	0	0	0	0	3	1	2	1	0	2	1	0	3	0	1	2	5	3	0	2	0	0	0
sp|P08754|GNAI3_HUMANGuaninenucleotide-bindingproteinG(k)subunitalphaOS=HomosapiensGN=GNAI3PE=1SV=3	sp|P08754|GNAI3_HUMANGuaninenucleotide-bindingproteinG(k)subunitalphaOS=HomosapiensGN=GNAI3PE=1SV=3	7	2	2		1	7	2	2	5	4	5	5	1	4	1	0	5	2	2	3	3	2	1	1	1	1	0	1	1	0	0	0	0	0	1	0	0	1	0	1	1	0	1	0	0	0	0	0
sp|P08758|ANXA5_HUMANAnnexinA5OS=HomosapiensGN=ANXA5PE=1SV=2;tr|E9PHT9|E9PHT9_HUMANAnnexinOS=HomosapiensGN=ANXA5PE=1SV=1;tr|D6RBL5|D6RBL5_HUMANAnnexinOS=HomosapiensGN=ANXA5PE=1SV=1;tr|D6RBE9|D6RBE9_HUMANAnnexinOS=HomosapiensGN=ANXA5PE=1SV=1;tr|D6RCN3|D6RCN3_HUMANAnnexinA5OS=HomosapiensGN=ANXA5PE=1SV=1	sp|P08758|ANXA5_HUMANAnnexinA5OS=HomosapiensGN=ANXA5PE=1SV=2;tr|E9PHT9|E9PHT9_HUMANAnnexinOS=HomosapiensGN=ANXA5PE=1SV=1;tr|D6RBL5|D6RBL5_HUMANAnnexinOS=HomosapiensGN=ANXA5PE=1SV=1	29;21;16;13;5	29;21;16;13;5	29;21;16;13;5	;;	5	29	29	29	17	15	16	18	11	24	25	1	18	17	1	2	4	3	3	5	1	3	1	4	1	17	15	16	18	11	24	25	1	18	17	1	2	4	3	3	5	1	3	1
tr|F8WD59|F8WD59_HUMAN40SribosomalproteinSA(Fragment)OS=HomosapiensGN=RPSAPE=1SV=2;tr|C9J9K3|C9J9K3_HUMAN40SribosomalproteinSA(Fragment)OS=HomosapiensGN=RPSAPE=1SV=8;sp|P08865|RSSA_HUMAN40SribosomalproteinSAOS=HomosapiensGN=RPSAPE=1SV=4;tr|A0A0C4DG17|A0A0C4DG17_HUMAN40SribosomalproteinSAOS=HomosapiensGN=RPSAPE=1SV=1	tr|F8WD59|F8WD59_HUMAN40SribosomalproteinSA(Fragment)OS=HomosapiensGN=RPSAPE=1SV=2;tr|C9J9K3|C9J9K3_HUMAN40SribosomalproteinSA(Fragment)OS=HomosapiensGN=RPSAPE=1SV=8;sp|P08865|RSSA_HUMAN40SribosomalproteinSAOS=HomosapiensGN=RPSAPE=1SV=4;tr|A0A0C4DG17|A0A0C4DG17_HUMAN40SribosomalproteinSAOS=HomosapiensGN=RPSAPE=1SV=1	3;3;3;3	3;3;3;3	3;3;3;3	;;;	4	3	3	3	1	1	1	1	1	3	3	0	3	2	1	1	0	1	1	0	0	0	0	1	0	1	1	1	1	1	3	3	0	3	2	1	1	0	1	1	0	0	0	0
sp|P09210|GSTA2_HUMANGlutathioneS-transferaseA2OS=HomosapiensGN=GSTA2PE=1SV=4	sp|P09210|GSTA2_HUMANGlutathioneS-transferaseA2OS=HomosapiensGN=GSTA2PE=1SV=4	14	14	2		1	14	14	2	7	6	6	8	2	11	8	0	7	6	3	5	2	5	3	5	4	2	0	4	1	7	6	6	8	2	11	8	0	7	6	3	5	2	5	3	5	4	2	0
sp|P09211|GSTP1_HUMANGlutathioneS-transferasePOS=HomosapiensGN=GSTP1PE=1SV=2;tr|A8MX94|A8MX94_HUMANGlutathioneS-transferasePOS=HomosapiensGN=GSTP1PE=1SV=1;tr|A0A087X2E9|A0A087X2E9_HUMANGlutathioneS-transferaseP(Fragment)OS=HomosapiensGN=GSTP1PE=1SV=1;tr|A0A087X243|A0A087X243_HUMANGlutathioneS-transferaseP(Fragment)OS=HomosapiensGN=GSTP1PE=1SV=1	sp|P09211|GSTP1_HUMANGlutathioneS-transferasePOS=HomosapiensGN=GSTP1PE=1SV=2;tr|A8MX94|A8MX94_HUMANGlutathioneS-transferasePOS=HomosapiensGN=GSTP1PE=1SV=1	14;12;6;1	14;12;6;1	14;12;6;1	;	4	14	14	14	6	2	6	5	2	14	13	0	10	10	2	3	2	3	1	10	3	1	0	1	0	6	2	6	5	2	14	13	0	10	10	2	3	2	3	1	10	3	1	0
sp|P09382|LEG1_HUMANGalectin-1OS=HomosapiensGN=LGALS1PE=1SV=2;tr|F8WEI7|F8WEI7_HUMANGalectin-1OS=HomosapiensGN=LGALS1PE=1SV=1	sp|P09382|LEG1_HUMANGalectin-1OS=HomosapiensGN=LGALS1PE=1SV=2	6;1	6;1	6;1		2	6	6	6	3	2	2	3	2	3	3	0	3	3	2	1	1	3	0	4	1	0	0	0	0	3	2	2	3	2	3	3	0	3	3	2	1	1	3	0	4	1	0	0
sp|P09467|F16P1_HUMANFructose-1,6-bisphosphatase1OS=HomosapiensGN=FBP1PE=1SV=5;tr|Q5VZC3|Q5VZC3_HUMANFructose-1,6-bisphosphatase1(Fragment)OS=HomosapiensGN=FBP1PE=1SV=1;sp|O00757|F16P2_HUMANFructose-1,6-bisphosphataseisozyme2OS=HomosapiensGN=FBP2PE=1SV=2	sp|P09467|F16P1_HUMANFructose-1,6-bisphosphatase1OS=HomosapiensGN=FBP1PE=1SV=5	8;3;1	8;3;1	8;3;1		3	8	8	8	4	3	5	5	1	4	5	1	5	3	4	3	3	6	0	2	1	0	0	0	0	4	3	5	5	1	4	5	1	5	3	4	3	3	6	0	2	1	0	0
tr|Q6P452|Q6P452_HUMANAnnexinOS=HomosapiensGN=ANXA4PE=1SV=1;sp|P09525|ANXA4_HUMANAnnexinA4OS=HomosapiensGN=ANXA4PE=1SV=4;tr|B4E1S2|B4E1S2_HUMANAnnexinOS=HomosapiensGN=ANXA4PE=1SV=1	tr|Q6P452|Q6P452_HUMANAnnexinOS=HomosapiensGN=ANXA4PE=1SV=1;sp|P09525|ANXA4_HUMANAnnexinA4OS=HomosapiensGN=ANXA4PE=1SV=4	13;13;6	13;13;6	13;13;6	;	3	13	13	13	6	3	5	5	2	4	9	0	2	7	3	3	2	3	0	3	0	1	1	1	0	6	3	5	5	2	4	9	0	2	7	3	3	2	3	0	3	0	1	1
tr|F8W646|F8W646_HUMANHeterogeneousnuclearribonucleoproteinA1(Fragment)OS=HomosapiensGN=HNRNPA1PE=1SV=1;tr|F8W6I7|F8W6I7_HUMANHeterogeneousnuclearribonucleoproteinA1OS=HomosapiensGN=HNRNPA1PE=1SV=2;sp|P09651|ROA1_HUMANHeterogeneousnuclearribonucleoproteinA1OS=HomosapiensGN=HNRNPA1PE=1SV=5;tr|F8VYN5|F8VYN5_HUMANHeterogeneousnuclearribonucleoproteinA1(Fragment)OS=HomosapiensGN=HNRNPA1PE=1SV=1;tr|F8…	tr|F8W646|F8W646_HUMANHeterogeneousnuclearribonucleoproteinA1(Fragment)OS=HomosapiensGN=HNRNPA1PE=1SV=1;tr|F8W6I7|F8W6I7_HUMANHeterogeneousnuclearribonucleoproteinA1OS=HomosapiensGN=HNRNPA1PE=1SV=2;sp|P09651|ROA1_HUMANHeterogeneousnuclearribonucleoproteinA1OS=HomosapiensGN=HNRNPA1PE=1SV=5;tr|F8VYN5|F8VYN5_HUMANHeterogeneousnuclearribonucleoproteinA1(Fragment)OS=HomosapiensGN=HNRNPA1PE=1SV=1;tr|F8…	2;2;2;1;1;1;1	2;2;2;1;1;1;1	2;2;2;1;1;1;1	;;;;;;	7	2	2	2	0	0	0	0	0	0	0	0	0	0	2	1	1	2	0	1	0	0	0	1	1	0	0	0	0	0	0	0	0	0	0	2	1	1	2	0	1	0	0	0
tr|A0A087X0D5|A0A087X0D5_HUMANPro-cathepsinHOS=HomosapiensGN=CTSHPE=1SV=1;sp|P09668|CATH_HUMANPro-cathepsinHOS=HomosapiensGN=CTSHPE=1SV=4;tr|E9PKT6|E9PKT6_HUMANPro-cathepsinH(Fragment)OS=HomosapiensGN=CTSHPE=1SV=1	tr|A0A087X0D5|A0A087X0D5_HUMANPro-cathepsinHOS=HomosapiensGN=CTSHPE=1SV=1;sp|P09668|CATH_HUMANPro-cathepsinHOS=HomosapiensGN=CTSHPE=1SV=4;tr|E9PKT6|E9PKT6_HUMANPro-cathepsinH(Fragment)OS=HomosapiensGN=CTSHPE=1SV=1	2;2;1	2;2;1	2;2;1	;;	3	2	2	2	0	0	0	0	0	0	0	0	0	0	0	0	0	2	0	0	0	0	0	1	0	0	0	0	0	0	0	0	0	0	0	0	0	0	2	0	0	0	0	0
sp|P09669|COX6C_HUMANCytochromecoxidasesubunit6COS=HomosapiensGN=COX6CPE=1SV=2	sp|P09669|COX6C_HUMANCytochromecoxidasesubunit6COS=HomosapiensGN=COX6CPE=1SV=2	1	1	1		1	1	1	1	0	0	0	1	0	0	0	0	0	0	1	1	0	1	0	0	0	0	0	0	0	0	0	0	1	0	0	0	0	0	0	1	1	0	1	0	0	0	0	0
sp|P09758|TACD2_HUMANTumor-associatedcalciumsignaltransducer2OS=HomosapiensGN=TACSTD2PE=1SV=3	sp|P09758|TACD2_HUMANTumor-associatedcalciumsignaltransducer2OS=HomosapiensGN=TACSTD2PE=1SV=3	3	3	3		1	3	3	3	2	1	2	2	0	0	0	0	0	0	1	1	0	3	0	1	1	2	0	0	0	2	1	2	2	0	0	0	0	0	0	1	1	0	3	0	1	1	2	0
tr|A0A087X232|A0A087X232_HUMANComplementC1ssubcomponentOS=HomosapiensGN=C1SPE=1SV=1;sp|P09871|C1S_HUMANComplementC1ssubcomponentOS=HomosapiensGN=C1SPE=1SV=1;tr|F8WCZ6|F8WCZ6_HUMANComplementC1ssubcomponentOS=HomosapiensGN=C1SPE=1SV=1;tr|H0Y5D1|H0Y5D1_HUMANComplementC1ssubcomponent(Fragment)OS=HomosapiensGN=C1SPE=1SV=1;tr|F5H7T4|F5H7T4_HUMANComplementC1ssubcomponent(Fragment)OS=HomosapiensGN=C1SPE=…	tr|A0A087X232|A0A087X232_HUMANComplementC1ssubcomponentOS=HomosapiensGN=C1SPE=1SV=1;sp|P09871|C1S_HUMANComplementC1ssubcomponentOS=HomosapiensGN=C1SPE=1SV=1;tr|F8WCZ6|F8WCZ6_HUMANComplementC1ssubcomponentOS=HomosapiensGN=C1SPE=1SV=1	14;14;12;4;2;2;1	14;14;12;4;2;2;1	13;13;12;3;2;1;0	;;	7	14	14	13	0	1	1	3	0	1	0	0	0	0	1	0	14	1	0	4	2	1	0	2	0	0	1	1	3	0	1	0	0	0	0	1	0	14	1	0	4	2	1	0
sp|P09914|IFIT1_HUMANInterferon-inducedproteinwithtetratricopeptiderepeats1OS=HomosapiensGN=IFIT1PE=1SV=2	sp|P09914|IFIT1_HUMANInterferon-inducedproteinwithtetratricopeptiderepeats1OS=HomosapiensGN=IFIT1PE=1SV=2	1	1	1		1	1	1	1	1	0	0	0	0	0	0	0	0	0	0	0	0	1	0	0	0	0	0	0	0	1	0	0	0	0	0	0	0	0	0	0	0	0	1	0	0	0	0	0
tr|A0A087X109|A0A087X109_HUMANArachidonate5-lipoxygenaseOS=HomosapiensGN=ALOX5PE=1SV=1;sp|P09917|LOX5_HUMANArachidonate5-lipoxygenaseOS=HomosapiensGN=ALOX5PE=1SV=2	tr|A0A087X109|A0A087X109_HUMANArachidonate5-lipoxygenaseOS=HomosapiensGN=ALOX5PE=1SV=1;sp|P09917|LOX5_HUMANArachidonate5-lipoxygenaseOS=HomosapiensGN=ALOX5PE=1SV=2	1;1	1;1	1;1	;	2	1	1	1	0	0	0	0	0	0	0	0	0	0	0	1	0	1	0	0	0	0	0	0	0	0	0	0	0	0	0	0	0	0	0	0	1	0	1	0	0	0	0	0
sp|P09960|LKHA4_HUMANLeukotrieneA-4hydrolaseOS=HomosapiensGN=LTA4HPE=1SV=2;tr|B4DEH5|B4DEH5_HUMANLeukotrieneA-4hydrolaseOS=HomosapiensGN=LTA4HPE=1SV=1	sp|P09960|LKHA4_HUMANLeukotrieneA-4hydrolaseOS=HomosapiensGN=LTA4HPE=1SV=2	30;7	30;7	30;7		2	30	30	30	12	7	6	9	12	25	18	0	21	17	6	13	9	17	1	6	2	1	0	1	2	12	7	6	9	12	25	18	0	21	17	6	13	9	17	1	6	2	1	0
sp|P0C0L4|CO4A_HUMANComplementC4-AOS=HomosapiensGN=C4APE=1SV=2;CON__ENSEMBL:ENSBTAP00000007350	sp|P0C0L4|CO4A_HUMANComplementC4-AOS=HomosapiensGN=C4APE=1SV=2	98;10	4;1	1;0		2	98	4	1	35	22	29	28	8	67	44	0	48	21	13	24	54	37	7	62	57	4	6	6	3	1	0	0	1	0	2	3	0	2	0	1	1	1	1	0	1	1	0	0
sp|P0C0L5|CO4B_HUMANComplementC4-BOS=HomosapiensGN=C4BPE=1SV=2;tr|F5GXS0|F5GXS0_HUMANComplementC4-BOS=HomosapiensGN=C4BPE=1SV=1;tr|A0A0G2JL54|A0A0G2JL54_HUMANComplementC4-BOS=HomosapiensGN=C4B_2PE=1SV=1	sp|P0C0L5|CO4B_HUMANComplementC4-BOS=HomosapiensGN=C4BPE=1SV=2;tr|F5GXS0|F5GXS0_HUMANComplementC4-BOS=HomosapiensGN=C4BPE=1SV=1;tr|A0A0G2JL54|A0A0G2JL54_HUMANComplementC4-BOS=HomosapiensGN=C4B_2PE=1SV=1	98;96;96	98;96;96	0;0;0	;;	3	98	98	0	35	22	29	27	8	67	42	0	48	21	12	24	55	38	7	63	57	4	6	6	3	35	22	29	27	8	67	42	0	48	21	12	24	55	38	7	63	57	4	6
sp|Q71UI9|H2AV_HUMANHistoneH2A.VOS=HomosapiensGN=H2AFVPE=1SV=3;sp|P0C0S5|H2AZ_HUMANHistoneH2A.ZOS=HomosapiensGN=H2AFZPE=1SV=2;tr|C9J0D1|C9J0D1_HUMANHistoneH2AOS=HomosapiensGN=H2AFVPE=1SV=1;tr|C9J386|C9J386_HUMANHistoneH2AOS=HomosapiensGN=H2AFVPE=3SV=1	sp|Q71UI9|H2AV_HUMANHistoneH2A.VOS=HomosapiensGN=H2AFVPE=1SV=3;sp|P0C0S5|H2AZ_HUMANHistoneH2A.ZOS=HomosapiensGN=H2AFZPE=1SV=2;tr|C9J0D1|C9J0D1_HUMANHistoneH2AOS=HomosapiensGN=H2AFVPE=1SV=1;tr|C9J386|C9J386_HUMANHistoneH2AOS=HomosapiensGN=H2AFVPE=3SV=1	5;5;4;3	3;3;2;2	3;3;2;2	;;;	4	5	3	3	2	1	3	3	2	5	4	3	4	4	3	3	2	2	0	1	0	2	0	1	0	0	0	1	2	0	3	2	1	3	2	1	1	1	1	0	0	0	0	0
sp|Q99878|H2A1J_HUMANHistoneH2Atype1-JOS=HomosapiensGN=HIST1H2AJPE=1SV=3;sp|Q96KK5|H2A1H_HUMANHistoneH2Atype1-HOS=HomosapiensGN=HIST1H2AHPE=1SV=3;sp|Q9BTM1|H2AJ_HUMANHistoneH2A.JOS=HomosapiensGN=H2AFJPE=1SV=1;sp|Q16777|H2A2C_HUMANHistoneH2Atype2-COS=HomosapiensGN=HIST2H2ACPE=1SV=4;sp|Q6FI13|H2A2A_HUMANHistoneH2Atype2-AOS=HomosapiensGN=HIST2H2AA3PE=1SV=3;sp|P0C0S8|H2A1_HUMANHistoneH2Atype1OS=Homos…	sp|Q99878|H2A1J_HUMANHistoneH2Atype1-JOS=HomosapiensGN=HIST1H2AJPE=1SV=3;sp|Q96KK5|H2A1H_HUMANHistoneH2Atype1-HOS=HomosapiensGN=HIST1H2AHPE=1SV=3;sp|Q9BTM1|H2AJ_HUMANHistoneH2A.JOS=HomosapiensGN=H2AFJPE=1SV=1;sp|Q16777|H2A2C_HUMANHistoneH2Atype2-COS=HomosapiensGN=HIST2H2ACPE=1SV=4;sp|Q6FI13|H2A2A_HUMANHistoneH2Atype2-AOS=HomosapiensGN=HIST2H2AA3PE=1SV=3;sp|P0C0S8|H2A1_HUMANHistoneH2Atype1OS=Homos…	9;9;9;9;9;9;8;8;8;5;5;5	2;2;2;2;2;2;2;2;2;2;0;0	2;2;2;2;2;2;2;2;2;2;0;0	;;;;;;;;;;;	12	9	2	2	4	3	5	4	6	7	7	5	7	6	3	3	2	2	1	6	5	5	0	4	0	1	1	2	2	2	2	2	1	2	2	1	1	1	1	0	2	1	1	0
tr|J3QS39|J3QS39_HUMANPolyubiquitin-B(Fragment)OS=HomosapiensGN=UBBPE=1SV=1;tr|J3QTR3|J3QTR3_HUMANUbiquitin-40SribosomalproteinS27a(Fragment)OS=HomosapiensGN=RPS27APE=1SV=1;tr|F5H6Q2|F5H6Q2_HUMANPolyubiquitin-C(Fragment)OS=HomosapiensGN=UBCPE=1SV=8;sp|P62987|RL40_HUMANUbiquitin-60SribosomalproteinL40OS=HomosapiensGN=UBA52PE=1SV=2;tr|F5GYU3|F5GYU3_HUMANPolyubiquitin-C(Fragment)OS=HomosapiensGN=UBC…	tr|J3QS39|J3QS39_HUMANPolyubiquitin-B(Fragment)OS=HomosapiensGN=UBBPE=1SV=1;tr|J3QTR3|J3QTR3_HUMANUbiquitin-40SribosomalproteinS27a(Fragment)OS=HomosapiensGN=RPS27APE=1SV=1;tr|F5H6Q2|F5H6Q2_HUMANPolyubiquitin-C(Fragment)OS=HomosapiensGN=UBCPE=1SV=8;sp|P62987|RL40_HUMANUbiquitin-60SribosomalproteinL40OS=HomosapiensGN=UBA52PE=1SV=2;tr|F5GYU3|F5GYU3_HUMANPolyubiquitin-C(Fragment)OS=HomosapiensGN=UBC…	4;4;4;4;4;4;4;4;4;4;4;4;4;4;4;4;4;3;3;3;3;2;2	4;4;4;4;4;4;4;4;4;4;4;4;4;4;4;4;4;3;3;3;3;2;2	4;4;4;4;4;4;4;4;4;4;4;4;4;4;4;4;4;3;3;3;3;2;2	;;;;;;;;;;;;;;;;;;;;;;	23	4	4	4	3	3	2	3	1	2	1	1	1	1	3	3	0	2	2	1	0	0	0	2	1	3	3	2	3	1	2	1	1	1	1	3	3	0	2	2	1	0	0	0
tr|E9PQD6|E9PQD6_HUMANSerumamyloidAproteinOS=HomosapiensGN=SAA1PE=1SV=1;sp|P0DJI8|SAA1_HUMANSerumamyloidA-1proteinOS=HomosapiensGN=SAA1PE=1SV=1;tr|E9PR14|E9PR14_HUMANSerumamyloidAproteinOS=HomosapiensGN=SAA2PE=3SV=1;tr|G3V1D9|G3V1D9_HUMANSerumamyloidAproteinOS=HomosapiensGN=SAA2PE=3SV=1;sp|P0DJI9|SAA2_HUMANSerumamyloidA-2proteinOS=HomosapiensGN=SAA2PE=1SV=1	tr|E9PQD6|E9PQD6_HUMANSerumamyloidAproteinOS=HomosapiensGN=SAA1PE=1SV=1;sp|P0DJI8|SAA1_HUMANSerumamyloidA-1proteinOS=HomosapiensGN=SAA1PE=1SV=1;tr|E9PR14|E9PR14_HUMANSerumamyloidAproteinOS=HomosapiensGN=SAA2PE=3SV=1;tr|G3V1D9|G3V1D9_HUMANSerumamyloidAproteinOS=HomosapiensGN=SAA2PE=3SV=1;sp|P0DJI9|SAA2_HUMANSerumamyloidA-2proteinOS=HomosapiensGN=SAA2PE=1SV=1	3;3;2;2;2	1;1;0;0;0	1;1;0;0;0	;;;;	5	3	1	1	2	0	0	0	0	1	0	0	2	0	1	1	1	1	0	3	3	0	0	0	0	1	0	0	0	0	0	0	0	1	0	1	1	1	1	0	1	1	0	0
sp|P0DMV9|HS71B_HUMANHeatshock70kDaprotein1BOS=HomosapiensGN=HSPA1BPE=1SV=1;sp|P0DMV8|HS71A_HUMANHeatshock70kDaprotein1AOS=HomosapiensGN=HSPA1APE=1SV=1;tr|A0A0G2JIW1|A0A0G2JIW1_HUMANHeatshock70kDaprotein1BOS=HomosapiensGN=HSPA1BPE=1SV=1;tr|V9GZ37|V9GZ37_HUMANHeatshock70kDaprotein1AOS=HomosapiensGN=HSPA1APE=1SV=1;tr|Q53FA3|Q53FA3_HUMANHSPA1L(Fragment)OS=HomosapiensGN=HSPA1LPE=1SV=1;sp|P34931|HS71L…	sp|P0DMV9|HS71B_HUMANHeatshock70kDaprotein1BOS=HomosapiensGN=HSPA1BPE=1SV=1;sp|P0DMV8|HS71A_HUMANHeatshock70kDaprotein1AOS=HomosapiensGN=HSPA1APE=1SV=1;tr|A0A0G2JIW1|A0A0G2JIW1_HUMANHeatshock70kDaprotein1BOS=HomosapiensGN=HSPA1BPE=1SV=1;tr|V9GZ37|V9GZ37_HUMANHeatshock70kDaprotein1AOS=HomosapiensGN=HSPA1APE=1SV=1	26;26;26;15;8;8	26;26;26;15;8;8	19;19;19;10;4;4	;;;	6	26	26	19	9	5	10	7	1	21	15	1	18	9	6	8	4	9	2	15	7	1	0	2	1	9	5	10	7	1	21	15	1	18	9	6	8	4	9	2	15	7	1	0
sp|P0DOY2|IGLC2_HUMANImmunoglobulinlambdaconstant2OS=HomosapiensGN=IGLC2PE=1SV=1;sp|P0CF74|IGLC6_HUMANImmunoglobulinlambdaconstant6OS=HomosapiensGN=IGLC6PE=1SV=1	sp|P0DOY2|IGLC2_HUMANImmunoglobulinlambdaconstant2OS=HomosapiensGN=IGLC2PE=1SV=1	14;5	2;1	0;0		2	14	2	0	8	6	7	8	3	8	2	0	5	1	5	6	6	7	2	14	14	4	3	6	1	0	0	0	0	0	1	1	0	0	0	0	0	0	0	0	2	2	2	2
sp|P0DOY3|IGLC3_HUMANImmunoglobulinlambdaconstant3OS=HomosapiensGN=IGLC3PE=1SV=1	sp|P0DOY3|IGLC3_HUMANImmunoglobulinlambdaconstant3OS=HomosapiensGN=IGLC3PE=1SV=1	14	14	2		1	14	14	2	8	6	7	8	3	8	2	0	5	1	5	6	6	7	2	14	14	4	2	6	1	8	6	7	8	3	8	2	0	5	1	5	6	6	7	2	14	14	4	2
sp|P0DP25|CALM3_HUMANCalmodulin-3OS=HomosapiensGN=CALM3PE=1SV=1;sp|P0DP24|CALM2_HUMANCalmodulin-2OS=HomosapiensGN=CALM2PE=1SV=1;sp|P0DP23|CALM1_HUMANCalmodulin-1OS=HomosapiensGN=CALM1PE=1SV=1;tr|H0Y7A7|H0Y7A7_HUMANCalmodulin-2(Fragment)OS=HomosapiensGN=CALM2PE=1SV=1;tr|E7ETZ0|E7ETZ0_HUMANCalmodulin-1OS=HomosapiensGN=CALM1PE=1SV=1;tr|E7EMB3|E7EMB3_HUMANCalmodulin-2OS=HomosapiensGN=CALM2PE=1SV=1;tr…	sp|P0DP25|CALM3_HUMANCalmodulin-3OS=HomosapiensGN=CALM3PE=1SV=1;sp|P0DP24|CALM2_HUMANCalmodulin-2OS=HomosapiensGN=CALM2PE=1SV=1;sp|P0DP23|CALM1_HUMANCalmodulin-1OS=HomosapiensGN=CALM1PE=1SV=1;tr|H0Y7A7|H0Y7A7_HUMANCalmodulin-2(Fragment)OS=HomosapiensGN=CALM2PE=1SV=1;tr|E7ETZ0|E7ETZ0_HUMANCalmodulin-1OS=HomosapiensGN=CALM1PE=1SV=1;tr|E7EMB3|E7EMB3_HUMANCalmodulin-2OS=HomosapiensGN=CALM2PE=1SV=1;tr…	7;7;7;7;5;5;4;4;3;3;3;1	7;7;7;7;5;5;4;4;3;3;3;1	7;7;7;7;5;5;4;4;3;3;3;1	;;;;;;;	12	7	7	7	3	3	3	3	0	0	0	0	2	0	2	2	2	2	0	7	1	1	0	1	1	3	3	3	3	0	0	0	0	2	0	2	2	2	2	0	7	1	1	0
sp|P62070|RRAS2_HUMANRas-relatedproteinR-Ras2OS=HomosapiensGN=RRAS2PE=1SV=1;sp|P10301|RRAS_HUMANRas-relatedproteinR-RasOS=HomosapiensGN=RRASPE=1SV=1;tr|E9PQK5|E9PQK5_HUMANRas-relatedproteinR-Ras2OS=HomosapiensGN=RRAS2PE=1SV=1;tr|E9PQC5|E9PQC5_HUMANRas-relatedproteinR-Ras2OS=HomosapiensGN=RRAS2PE=1SV=1;tr|E9PK85|E9PK85_HUMANRas-relatedproteinR-Ras2(Fragment)OS=HomosapiensGN=RRAS2PE=1SV=1	sp|P62070|RRAS2_HUMANRas-relatedproteinR-Ras2OS=HomosapiensGN=RRAS2PE=1SV=1;sp|P10301|RRAS_HUMANRas-relatedproteinR-RasOS=HomosapiensGN=RRASPE=1SV=1;tr|E9PQK5|E9PQK5_HUMANRas-relatedproteinR-Ras2OS=HomosapiensGN=RRAS2PE=1SV=1;tr|E9PQC5|E9PQC5_HUMANRas-relatedproteinR-Ras2OS=HomosapiensGN=RRAS2PE=1SV=1;tr|E9PK85|E9PK85_HUMANRas-relatedproteinR-Ras2(Fragment)OS=HomosapiensGN=RRAS2PE=1SV=1	2;2;1;1;1	2;2;1;1;1	2;2;1;1;1	;;;;	5	2	2	2	0	0	0	0	0	1	0	0	1	0	1	1	0	1	0	0	0	0	0	1	0	0	0	0	0	0	1	0	0	1	0	1	1	0	1	0	0	0	0	0
tr|A0A140T975|A0A140T975_HUMANHLAclassIhistocompatibilityantigen,A-3alphachainOS=HomosapiensGN=HLA-APE=1SV=1;tr|Q9GJ45|Q9GJ45_HUMANHLAclassIhistocompatibilityantigen,A-3alphachainOS=HomosapiensGN=HLA-APE=1SV=1;tr|A0A1W2PS39|A0A1W2PS39_HUMANHLAclassIhistocompatibilityantigen,A-3alphachainOS=HomosapiensGN=HLA-APE=1SV=1;sp|P30459|1A74_HUMANHLAclassIhistocompatibilityantigen,A-74alphachainOS=Homosapi…	tr|A0A140T975|A0A140T975_HUMANHLAclassIhistocompatibilityantigen,A-3alphachainOS=HomosapiensGN=HLA-APE=1SV=1;tr|Q9GJ45|Q9GJ45_HUMANHLAclassIhistocompatibilityantigen,A-3alphachainOS=HomosapiensGN=HLA-APE=1SV=1;tr|A0A1W2PS39|A0A1W2PS39_HUMANHLAclassIhistocompatibilityantigen,A-3alphachainOS=HomosapiensGN=HLA-APE=1SV=1;sp|P30459|1A74_HUMANHLAclassIhistocompatibilityantigen,A-74alphachainOS=Homosapi…	9;9;9;9;9;8;8;8;8;8;8;6	5;5;5;5;5;4;4;4;4;4;4;4	0;0;0;0;0;0;0;0;0;0;0;0	;;;;;;;;;;;	12	9	5	0	4	3	3	2	1	4	2	0	3	1	2	2	2	4	1	4	4	1	2	1	0	2	2	1	1	0	1	0	0	2	0	1	1	0	2	0	1	1	0	2
sp|P10316|1A69_HUMANHLAclassIhistocompatibilityantigen,A-69alphachainOS=HomosapiensGN=HLA-APE=1SV=2;sp|P01891|1A68_HUMANHLAclassIhistocompatibilityantigen,A-68alphachainOS=HomosapiensGN=HLA-APE=1SV=4	sp|P10316|1A69_HUMANHLAclassIhistocompatibilityantigen,A-69alphachainOS=HomosapiensGN=HLA-APE=1SV=2;sp|P01891|1A68_HUMANHLAclassIhistocompatibilityantigen,A-68alphachainOS=HomosapiensGN=HLA-APE=1SV=4	9;8	1;0	0;0	;	2	9	1	0	5	3	3	2	1	4	2	0	2	1	2	4	2	5	2	4	4	2	3	1	0	1	0	0	0	0	0	0	0	0	0	0	1	0	1	0	0	0	0	0
tr|O19617|O19617_HUMANHLAclassIantigenOS=HomosapiensGN=HLA-CPE=1SV=1;sp|P10321|1C07_HUMANHLAclassIhistocompatibilityantigen,Cw-7alphachainOS=HomosapiensGN=HLA-CPE=1SV=3;tr|A0A140T921|A0A140T921_HUMANHLAclassIhistocompatibilityantigen,Cw-6alphachainOS=HomosapiensGN=HLA-CPE=1SV=1;tr|A2AEA2|A2AEA2_HUMANHLAclassIhistocompatibilityantigen,Cw-6alphachainOS=HomosapiensGN=HLA-CPE=1SV=2;tr|A0A140T9H5|A0A1…	tr|O19617|O19617_HUMANHLAclassIantigenOS=HomosapiensGN=HLA-CPE=1SV=1;sp|P10321|1C07_HUMANHLAclassIhistocompatibilityantigen,Cw-7alphachainOS=HomosapiensGN=HLA-CPE=1SV=3;tr|A0A140T921|A0A140T921_HUMANHLAclassIhistocompatibilityantigen,Cw-6alphachainOS=HomosapiensGN=HLA-CPE=1SV=1;tr|A2AEA2|A2AEA2_HUMANHLAclassIhistocompatibilityantigen,Cw-6alphachainOS=HomosapiensGN=HLA-CPE=1SV=2;tr|A0A140T9H5|A0A1…	8;8;8;8;8;8;7;5;5;5;5;5	1;1;1;1;1;1;1;0;0;0;0;0	1;1;1;1;1;1;1;0;0;0;0;0	;;;;;;;;;;;	12	8	1	1	5	3	4	3	1	5	3	0	3	2	4	4	3	5	1	4	4	1	0	2	0	0	0	0	0	0	1	0	0	1	0	1	0	1	1	0	0	0	0	0
sp|P10412|H14_HUMANHistoneH1.4OS=HomosapiensGN=HIST1H1EPE=1SV=2;sp|Q02539|H11_HUMANHistoneH1.1OS=HomosapiensGN=HIST1H1APE=1SV=3;sp|P22492|H1T_HUMANHistoneH1tOS=HomosapiensGN=HIST1H1TPE=2SV=4	sp|P10412|H14_HUMANHistoneH1.4OS=HomosapiensGN=HIST1H1EPE=1SV=2;sp|Q02539|H11_HUMANHistoneH1.1OS=HomosapiensGN=HIST1H1APE=1SV=3	9;5;2	1;0;0	1;0;0	;	3	9	1	1	4	4	6	4	0	9	5	1	5	4	2	0	0	0	0	5	4	1	1	0	0	0	0	1	1	0	1	0	0	0	0	1	0	0	0	0	0	0	0	0
sp|P10599|THIO_HUMANThioredoxinOS=HomosapiensGN=TXNPE=1SV=3	sp|P10599|THIO_HUMANThioredoxinOS=HomosapiensGN=TXNPE=1SV=3	3	3	3		1	3	3	3	2	2	1	2	0	0	0	0	0	0	1	1	1	1	0	0	0	0	0	0	0	2	2	1	2	0	0	0	0	0	0	1	1	1	1	0	0	0	0	0
sp|P10643|CO7_HUMANComplementcomponentC7OS=HomosapiensGN=C7PE=1SV=2;CON__Q29RQ1	sp|P10643|CO7_HUMANComplementcomponentC7OS=HomosapiensGN=C7PE=1SV=2	10;1	10;1	10;1		2	10	10	10	0	0	0	0	1	1	0	0	0	0	0	3	7	3	1	6	4	1	0	2	1	0	0	0	0	1	1	0	0	0	0	0	3	7	3	1	6	4	1	0
sp|P10809|CH60_HUMAN60kDaheatshockprotein,mitochondrialOS=HomosapiensGN=HSPD1PE=1SV=2	sp|P10809|CH60_HUMAN60kDaheatshockprotein,mitochondrialOS=HomosapiensGN=HSPD1PE=1SV=2	1	1	1		1	1	1	1	0	0	0	0	0	0	0	0	0	0	0	0	0	0	0	0	0	0	0	1	0	0	0	0	0	0	0	0	0	0	0	0	0	0	0	0	0	0	0	0
sp|P10909|CLUS_HUMANClusterinOS=HomosapiensGN=CLUPE=1SV=1;tr|E7ERK6|E7ERK6_HUMANClusterin(Fragment)OS=HomosapiensGN=CLUPE=1SV=1;tr|H0YLK8|H0YLK8_HUMANClusterin(Fragment)OS=HomosapiensGN=CLUPE=1SV=1;tr|E7ETB4|E7ETB4_HUMANClusterin(Fragment)OS=HomosapiensGN=CLUPE=1SV=1;tr|E5RJZ5|E5RJZ5_HUMANClusterin(Fragment)OS=HomosapiensGN=CLUPE=1SV=1;tr|H0YC35|H0YC35_HUMANClusterin(Fragment)OS=HomosapiensGN=CLU…	sp|P10909|CLUS_HUMANClusterinOS=HomosapiensGN=CLUPE=1SV=1;tr|E7ERK6|E7ERK6_HUMANClusterin(Fragment)OS=HomosapiensGN=CLUPE=1SV=1;tr|H0YLK8|H0YLK8_HUMANClusterin(Fragment)OS=HomosapiensGN=CLUPE=1SV=1;tr|E7ETB4|E7ETB4_HUMANClusterin(Fragment)OS=HomosapiensGN=CLUPE=1SV=1	29;16;16;15;13;12;11;11;11;9	29;16;16;15;13;12;11;11;11;9	29;16;16;15;13;12;11;11;11;9	;;;	10	29	29	29	12	12	14	13	5	12	15	0	10	11	6	9	9	10	1	25	23	3	0	2	1	12	12	14	13	5	12	15	0	10	11	6	9	9	10	1	25	23	3	0
sp|P11021|GRP78_HUMAN78kDaglucose-regulatedproteinOS=HomosapiensGN=HSPA5PE=1SV=2	sp|P11021|GRP78_HUMAN78kDaglucose-regulatedproteinOS=HomosapiensGN=HSPA5PE=1SV=2	11	11	11		1	11	11	11	3	1	1	1	0	5	2	0	1	4	2	5	7	9	1	1	0	1	1	0	1	3	1	1	1	0	5	2	0	1	4	2	5	7	9	1	1	0	1	1
sp|P11142|HSP7C_HUMANHeatshockcognate71kDaproteinOS=HomosapiensGN=HSPA8PE=1SV=1;tr|E9PKE3|E9PKE3_HUMANHeatshockcognate71kDaproteinOS=HomosapiensGN=HSPA8PE=1SV=1;tr|E9PNE6|E9PNE6_HUMANHeatshockcognate71kDaproteinOS=HomosapiensGN=HSPA8PE=1SV=1;tr|E9PN89|E9PN89_HUMANHeatshockcognate71kDaprotein(Fragment)OS=HomosapiensGN=HSPA8PE=1SV=1;tr|E9PQQ4|E9PQQ4_HUMANHeatshockcognate71kDaprotein(Fragment)OS=Hom…	sp|P11142|HSP7C_HUMANHeatshockcognate71kDaproteinOS=HomosapiensGN=HSPA8PE=1SV=1;tr|E9PKE3|E9PKE3_HUMANHeatshockcognate71kDaproteinOS=HomosapiensGN=HSPA8PE=1SV=1;tr|E9PNE6|E9PNE6_HUMANHeatshockcognate71kDaproteinOS=HomosapiensGN=HSPA8PE=1SV=1;tr|E9PN89|E9PN89_HUMANHeatshockcognate71kDaprotein(Fragment)OS=HomosapiensGN=HSPA8PE=1SV=1	24;23;16;15;10;10;10;10;9;8;7;6;6;5	22;21;14;15;9;9;9;9;7;7;6;5;5;4	11;10;4;9;9;9;9;9;3;7;6;5;0;0	;;;	14	24	22	11	10	8	14	13	5	18	15	7	14	13	6	10	7	12	3	11	4	0	0	3	1	9	8	13	13	5	16	14	6	13	12	6	10	7	11	3	10	3	0	0
sp|P11166|GTR1_HUMANSolutecarrierfamily2,facilitatedglucosetransportermember1OS=HomosapiensGN=SLC2A1PE=1SV=2	sp|P11166|GTR1_HUMANSolutecarrierfamily2,facilitatedglucosetransportermember1OS=HomosapiensGN=SLC2A1PE=1SV=2	1	1	1		1	1	1	1	0	0	0	0	0	1	0	0	0	0	0	0	0	0	0	0	0	0	0	0	0	0	0	0	0	0	1	0	0	0	0	0	0	0	0	0	0	0	0	0
sp|P11169|GTR3_HUMANSolutecarrierfamily2,facilitatedglucosetransportermember3OS=HomosapiensGN=SLC2A3PE=1SV=1;sp|Q8TDB8|GTR14_HUMANSolutecarrierfamily2,facilitatedglucosetransportermember14OS=HomosapiensGN=SLC2A14PE=2SV=1	sp|P11169|GTR3_HUMANSolutecarrierfamily2,facilitatedglucosetransportermember3OS=HomosapiensGN=SLC2A3PE=1SV=1;sp|Q8TDB8|GTR14_HUMANSolutecarrierfamily2,facilitatedglucosetransportermember14OS=HomosapiensGN=SLC2A14PE=2SV=1	1;1	1;1	1;1	;	2	1	1	1	0	1	0	0	0	0	0	0	0	0	1	1	0	1	0	0	0	0	0	0	0	0	1	0	0	0	0	0	0	0	0	1	1	0	1	0	0	0	0	0
sp|P11177|ODPB_HUMANPyruvatedehydrogenaseE1componentsubunitbeta,mitochondrialOS=HomosapiensGN=PDHBPE=1SV=3	sp|P11177|ODPB_HUMANPyruvatedehydrogenaseE1componentsubunitbeta,mitochondrialOS=HomosapiensGN=PDHBPE=1SV=3	1	1	1		1	1	1	1	0	0	0	0	0	0	0	0	0	0	1	1	0	1	0	0	0	0	0	0	1	0	0	0	0	0	0	0	0	0	0	1	1	0	1	0	0	0	0	0
sp|P11215|ITAM_HUMANIntegrinalpha-MOS=HomosapiensGN=ITGAMPE=1SV=2;sp|Q13349|ITAD_HUMANIntegrinalpha-DOS=HomosapiensGN=ITGADPE=1SV=2	sp|P11215|ITAM_HUMANIntegrinalpha-MOS=HomosapiensGN=ITGAMPE=1SV=2	17;1	17;1	16;0		2	17	17	16	5	8	11	12	3	7	1	0	8	1	3	10	1	6	1	4	0	3	2	5	0	5	8	11	12	3	7	1	0	8	1	3	10	1	6	1	4	0	3	2
sp|P11216|PYGB_HUMANGlycogenphosphorylase,brainformOS=HomosapiensGN=PYGBPE=1SV=5;sp|P11217|PYGM_HUMANGlycogenphosphorylase,muscleformOS=HomosapiensGN=PYGMPE=1SV=6;tr|H0Y4Z6|H0Y4Z6_HUMANAlpha-1,4glucanphosphorylase(Fragment)OS=HomosapiensGN=PYGBPE=1SV=1	sp|P11216|PYGB_HUMANGlycogenphosphorylase,brainformOS=HomosapiensGN=PYGBPE=1SV=5;sp|P11217|PYGM_HUMANGlycogenphosphorylase,muscleformOS=HomosapiensGN=PYGMPE=1SV=6	10;7;3	4;1;2	4;1;2	;	3	10	4	4	5	4	6	6	1	6	1	0	4	2	3	5	2	5	1	1	0	2	1	1	2	2	0	1	2	0	0	0	0	1	0	1	3	0	3	0	0	0	0	0
sp|P11226|MBL2_HUMANMannose-bindingproteinCOS=HomosapiensGN=MBL2PE=1SV=2	sp|P11226|MBL2_HUMANMannose-bindingproteinCOS=HomosapiensGN=MBL2PE=1SV=2	3	3	3		1	3	3	3	0	0	0	0	0	1	0	0	1	0	0	0	3	0	0	1	1	0	0	0	0	0	0	0	0	0	1	0	0	1	0	0	0	3	0	0	1	1	0	0
tr|H7C3P7|H7C3P7_HUMANRas-relatedproteinRal-A(Fragment)OS=HomosapiensGN=RALAPE=1SV=1;sp|P11233|RALA_HUMANRas-relatedproteinRal-AOS=HomosapiensGN=RALAPE=1SV=1;tr|F8WEQ6|F8WEQ6_HUMANRas-relatedproteinRal-BOS=HomosapiensGN=RALBPE=1SV=1;tr|C9JPE8|C9JPE8_HUMANRas-relatedproteinRal-A(Fragment)OS=HomosapiensGN=RALAPE=1SV=1;tr|C9JYR1|C9JYR1_HUMANRas-relatedproteinRal-B(Fragment)OS=HomosapiensGN=RALBPE=1S…	tr|H7C3P7|H7C3P7_HUMANRas-relatedproteinRal-A(Fragment)OS=HomosapiensGN=RALAPE=1SV=1;sp|P11233|RALA_HUMANRas-relatedproteinRal-AOS=HomosapiensGN=RALAPE=1SV=1;tr|F8WEQ6|F8WEQ6_HUMANRas-relatedproteinRal-BOS=HomosapiensGN=RALBPE=1SV=1;tr|C9JPE8|C9JPE8_HUMANRas-relatedproteinRal-A(Fragment)OS=HomosapiensGN=RALAPE=1SV=1;tr|C9JYR1|C9JYR1_HUMANRas-relatedproteinRal-B(Fragment)OS=HomosapiensGN=RALBPE=1S…	2;2;1;1;1;1;1;1	2;2;1;1;1;1;1;1	2;2;1;1;1;1;1;1	;;;;;;;	8	2	2	2	0	1	1	1	0	1	1	0	2	0	0	1	0	1	0	0	0	0	0	0	0	0	1	1	1	0	1	1	0	2	0	0	1	0	1	0	0	0	0	0
sp|P11277|SPTB1_HUMANSpectrinbetachain,erythrocyticOS=HomosapiensGN=SPTBPE=1SV=5;tr|H0YJE6|H0YJE6_HUMANSpectrinbetachain,erythrocytic(Fragment)OS=HomosapiensGN=SPTBPE=1SV=1	sp|P11277|SPTB1_HUMANSpectrinbetachain,erythrocyticOS=HomosapiensGN=SPTBPE=1SV=5	5;1	5;1	5;1		2	5	5	5	0	0	0	0	0	2	0	0	1	0	0	1	3	0	0	0	0	0	0	2	0	0	0	0	0	0	2	0	0	1	0	0	1	3	0	0	0	0	0	0
sp|P11279|LAMP1_HUMANLysosome-associatedmembraneglycoprotein1OS=HomosapiensGN=LAMP1PE=1SV=3	sp|P11279|LAMP1_HUMANLysosome-associatedmembraneglycoprotein1OS=HomosapiensGN=LAMP1PE=1SV=3	3	3	3		1	3	3	3	2	0	3	3	0	1	0	0	1	0	0	1	0	1	0	0	0	0	0	0	0	2	0	3	3	0	1	0	0	1	0	0	1	0	1	0	0	0	0	0
sp|P11413|G6PD_HUMANGlucose-6-phosphate1-dehydrogenaseOS=HomosapiensGN=G6PDPE=1SV=4;tr|E9PD92|E9PD92_HUMANGlucose-6-phosphate1-dehydrogenase(Fragment)OS=HomosapiensGN=G6PDPE=1SV=1;tr|E7EM57|E7EM57_HUMANGlucose-6-phosphate1-dehydrogenase(Fragment)OS=HomosapiensGN=G6PDPE=1SV=1;tr|E7EUI8|E7EUI8_HUMANGlucose-6-phosphate1-dehydrogenase(Fragment)OS=HomosapiensGN=G6PDPE=1SV=8	sp|P11413|G6PD_HUMANGlucose-6-phosphate1-dehydrogenaseOS=HomosapiensGN=G6PDPE=1SV=4;tr|E9PD92|E9PD92_HUMANGlucose-6-phosphate1-dehydrogenase(Fragment)OS=HomosapiensGN=G6PDPE=1SV=1;tr|E7EM57|E7EM57_HUMANGlucose-6-phosphate1-dehydrogenase(Fragment)OS=HomosapiensGN=G6PDPE=1SV=1;tr|E7EUI8|E7EUI8_HUMANGlucose-6-phosphate1-dehydrogenase(Fragment)OS=HomosapiensGN=G6PDPE=1SV=8	15;12;12;12	15;12;12;12	15;12;12;12	;;;	4	15	15	15	6	6	4	7	1	12	8	0	12	2	2	3	0	4	0	1	1	5	2	1	0	6	6	4	7	1	12	8	0	12	2	2	3	0	4	0	1	1	5	2
sp|P11586|C1TC_HUMANC-1-tetrahydrofolatesynthase,cytoplasmicOS=HomosapiensGN=MTHFD1PE=1SV=3;tr|F5H2F4|F5H2F4_HUMANC-1-tetrahydrofolatesynthase,cytoplasmicOS=HomosapiensGN=MTHFD1PE=1SV=1;tr|V9GYY3|V9GYY3_HUMANC-1-tetrahydrofolatesynthase,cytoplasmic(Fragment)OS=HomosapiensGN=MTHFD1PE=1SV=1	sp|P11586|C1TC_HUMANC-1-tetrahydrofolatesynthase,cytoplasmicOS=HomosapiensGN=MTHFD1PE=1SV=3;tr|F5H2F4|F5H2F4_HUMANC-1-tetrahydrofolatesynthase,cytoplasmicOS=HomosapiensGN=MTHFD1PE=1SV=1	7;7;3	7;7;3	7;7;3	;	3	7	7	7	3	1	1	2	0	1	0	0	1	0	2	3	1	5	2	0	1	1	1	0	0	3	1	1	2	0	1	0	0	1	0	2	3	1	5	2	0	1	1	1
sp|P11678|PERE_HUMANEosinophilperoxidaseOS=HomosapiensGN=EPXPE=1SV=2	sp|P11678|PERE_HUMANEosinophilperoxidaseOS=HomosapiensGN=EPXPE=1SV=2	23	16	16		1	23	16	16	11	8	10	10	3	6	1	0	3	1	3	2	3	1	3	14	4	16	12	10	2	6	4	5	5	0	0	0	0	0	0	0	1	0	0	1	9	1	11	7
sp|P11684|UTER_HUMANUteroglobinOS=HomosapiensGN=SCGB1A1PE=1SV=1	sp|P11684|UTER_HUMANUteroglobinOS=HomosapiensGN=SCGB1A1PE=1SV=1	5	1	1		1	5	1	1	1	1	2	2	1	3	3	0	2	2	1	2	1	2	1	5	5	1	0	2	1	0	0	0	0	0	1	0	0	0	0	0	0	0	0	0	1	1	0	0
tr|E5RI92|E5RI92_HUMANPulmonarysurfactant-associatedproteinCOS=HomosapiensGN=SFTPCPE=1SV=1;tr|C9JYF6|C9JYF6_HUMANPulmonarysurfactant-associatedproteinCOS=HomosapiensGN=SFTPCPE=1SV=2;tr|A0A0A0MTC9|A0A0A0MTC9_HUMANPulmonarysurfactant-associatedproteinCOS=HomosapiensGN=SFTPCPE=1SV=1;sp|P11686|PSPC_HUMANPulmonarysurfactant-associatedproteinCOS=HomosapiensGN=SFTPCPE=1SV=2	tr|E5RI92|E5RI92_HUMANPulmonarysurfactant-associatedproteinCOS=HomosapiensGN=SFTPCPE=1SV=1;tr|C9JYF6|C9JYF6_HUMANPulmonarysurfactant-associatedproteinCOS=HomosapiensGN=SFTPCPE=1SV=2;tr|A0A0A0MTC9|A0A0A0MTC9_HUMANPulmonarysurfactant-associatedproteinCOS=HomosapiensGN=SFTPCPE=1SV=1;sp|P11686|PSPC_HUMANPulmonarysurfactant-associatedproteinCOS=HomosapiensGN=SFTPCPE=1SV=2	1;1;1;1	1;1;1;1	1;1;1;1	;;;	4	1	1	1	1	1	1	1	0	0	0	0	0	0	1	1	1	1	0	1	1	0	0	0	0	1	1	1	1	0	0	0	0	0	0	1	1	1	1	0	1	1	0	0
sp|P11766|ADHX_HUMANAlcoholdehydrogenaseclass-3OS=HomosapiensGN=ADH5PE=1SV=4;tr|D6RFE4|D6RFE4_HUMANAlcoholdehydrogenaseclass-3OS=HomosapiensGN=ADH5PE=1SV=1;tr|H0YAG8|H0YAG8_HUMANAlcoholdehydrogenaseclass-3(Fragment)OS=HomosapiensGN=ADH5PE=1SV=1;tr|D6RAY0|D6RAY0_HUMANAlcoholdehydrogenaseclass-3OS=HomosapiensGN=ADH5PE=1SV=1;tr|D6R9G2|D6R9G2_HUMANAlcoholdehydrogenaseclass-3OS=HomosapiensGN=ADH5PE=1S…	sp|P11766|ADHX_HUMANAlcoholdehydrogenaseclass-3OS=HomosapiensGN=ADH5PE=1SV=4;tr|D6RFE4|D6RFE4_HUMANAlcoholdehydrogenaseclass-3OS=HomosapiensGN=ADH5PE=1SV=1;tr|H0YAG8|H0YAG8_HUMANAlcoholdehydrogenaseclass-3(Fragment)OS=HomosapiensGN=ADH5PE=1SV=1	3;2;2;1;1	3;2;2;1;1	3;2;2;1;1	;;	5	3	3	3	1	1	0	0	0	1	1	0	2	0	2	2	0	2	1	1	0	0	0	0	0	1	1	0	0	0	1	1	0	2	0	2	2	0	2	1	1	0	0	0
sp|P12035|K2C3_HUMANKeratin,typeIIcytoskeletal3OS=HomosapiensGN=KRT3PE=1SV=3;CON__P12035;tr|H0YID6|H0YID6_HUMANKeratin,typeIIcytoskeletal79(Fragment)OS=HomosapiensGN=KRT79PE=3SV=1	sp|P12035|K2C3_HUMANKeratin,typeIIcytoskeletal3OS=HomosapiensGN=KRT3PE=1SV=3;CON__P12035	7;6;2	1;0;0	0;0;0	;	3	7	1	0	1	1	2	2	1	3	1	0	3	1	2	2	3	4	1	1	2	1	0	2	0	0	0	0	0	1	0	1	0	1	1	0	0	0	0	0	1	0	0	0
sp|P12259|FA5_HUMANCoagulationfactorVOS=HomosapiensGN=F5PE=1SV=4;tr|A0A0A0MRJ7|A0A0A0MRJ7_HUMANCoagulationfactorVOS=HomosapiensGN=F5PE=1SV=1	sp|P12259|FA5_HUMANCoagulationfactorVOS=HomosapiensGN=F5PE=1SV=4;tr|A0A0A0MRJ7|A0A0A0MRJ7_HUMANCoagulationfactorVOS=HomosapiensGN=F5PE=1SV=1	9;9	9;9	9;9	;	2	9	9	9	2	2	0	0	1	0	0	0	0	0	0	1	9	1	0	0	0	1	1	0	0	2	2	0	0	1	0	0	0	0	0	0	1	9	1	0	0	0	1	1
tr|H0Y4R1|H0Y4R1_HUMANInosine-5'-monophosphatedehydrogenase2(Fragment)OS=HomosapiensGN=IMPDH2PE=1SV=1;sp|P12268|IMDH2_HUMANInosine-5'-monophosphatedehydrogenase2OS=HomosapiensGN=IMPDH2PE=1SV=2	tr|H0Y4R1|H0Y4R1_HUMANInosine-5'-monophosphatedehydrogenase2(Fragment)OS=HomosapiensGN=IMPDH2PE=1SV=1;sp|P12268|IMDH2_HUMANInosine-5'-monophosphatedehydrogenase2OS=HomosapiensGN=IMPDH2PE=1SV=2	1;1	1;1	1;1	;	2	1	1	1	0	0	1	1	0	0	0	0	1	0	0	0	0	0	0	0	0	0	0	0	0	0	0	1	1	0	0	0	0	1	0	0	0	0	0	0	0	0	0	0
sp|P12270|TPR_HUMANNucleoproteinTPROS=HomosapiensGN=TPRPE=1SV=3	sp|P12270|TPR_HUMANNucleoproteinTPROS=HomosapiensGN=TPRPE=1SV=3	1	1	1		1	1	1	1	0	0	1	1	0	0	0	0	1	0	0	1	0	1	0	0	0	0	1	1	0	0	0	1	1	0	0	0	0	1	0	0	1	0	1	0	0	0	0	1
sp|P12273|PIP_HUMANProlactin-inducibleproteinOS=HomosapiensGN=PIPPE=1SV=1	sp|P12273|PIP_HUMANProlactin-inducibleproteinOS=HomosapiensGN=PIPPE=1SV=1	4	4	4		1	4	4	4	0	1	0	0	0	3	0	0	1	0	1	1	0	1	0	1	0	0	0	0	0	0	1	0	0	0	3	0	0	1	0	1	1	0	1	0	1	0	0	0
sp|P12277|KCRB_HUMANCreatinekinaseB-typeOS=HomosapiensGN=CKBPE=1SV=1;tr|G3V4N7|G3V4N7_HUMANCreatinekinaseB-type(Fragment)OS=HomosapiensGN=CKBPE=1SV=1;tr|G3V461|G3V461_HUMANCreatinekinaseB-type(Fragment)OS=HomosapiensGN=CKBPE=1SV=1;tr|H0YJG0|H0YJG0_HUMANCreatinekinaseB-type(Fragment)OS=HomosapiensGN=CKBPE=1SV=1;tr|G3V2I1|G3V2I1_HUMANCreatinekinaseB-typeOS=HomosapiensGN=CKBPE=1SV=1;tr|H0YJK0|H0YJK0…	sp|P12277|KCRB_HUMANCreatinekinaseB-typeOS=HomosapiensGN=CKBPE=1SV=1;tr|G3V4N7|G3V4N7_HUMANCreatinekinaseB-type(Fragment)OS=HomosapiensGN=CKBPE=1SV=1	8;5;3;2;1;1	8;5;3;2;1;1	8;5;3;2;1;1	;	6	8	8	8	2	0	1	1	0	5	3	0	4	2	3	2	1	2	0	2	2	0	0	1	0	2	0	1	1	0	5	3	0	4	2	3	2	1	2	0	2	2	0	0
tr|F5GXY9|F5GXY9_HUMANLowaffinityimmunoglobulingammaFcregionreceptorII-aOS=HomosapiensGN=FCGR2APE=1SV=1;tr|F5GX41|F5GX41_HUMANLowaffinityimmunoglobulingammaFcregionreceptorII-aOS=HomosapiensGN=FCGR2APE=1SV=1;tr|V9GY83|V9GY83_HUMANLowaffinityimmunoglobulingammaFcregionreceptorII-a(Fragment)OS=HomosapiensGN=FCGR2APE=1SV=1;sp|P12318|FCG2A_HUMANLowaffinityimmunoglobulingammaFcregionreceptorII-aOS=Hom…	tr|F5GXY9|F5GXY9_HUMANLowaffinityimmunoglobulingammaFcregionreceptorII-aOS=HomosapiensGN=FCGR2APE=1SV=1;tr|F5GX41|F5GX41_HUMANLowaffinityimmunoglobulingammaFcregionreceptorII-aOS=HomosapiensGN=FCGR2APE=1SV=1;tr|V9GY83|V9GY83_HUMANLowaffinityimmunoglobulingammaFcregionreceptorII-a(Fragment)OS=HomosapiensGN=FCGR2APE=1SV=1;sp|P12318|FCG2A_HUMANLowaffinityimmunoglobulingammaFcregionreceptorII-aOS=Hom…	1;1;1;1	1;1;1;1	1;1;1;1	;;;	4	1	1	1	0	0	0	0	0	0	0	0	0	0	0	0	0	1	0	0	0	0	0	0	0	0	0	0	0	0	0	0	0	0	0	0	0	0	1	0	0	0	0	0
sp|P12429|ANXA3_HUMANAnnexinA3OS=HomosapiensGN=ANXA3PE=1SV=3;tr|D6RFG5|D6RFG5_HUMANAnnexin(Fragment)OS=HomosapiensGN=ANXA3PE=1SV=1;tr|D6RCA8|D6RCA8_HUMANAnnexin(Fragment)OS=HomosapiensGN=ANXA3PE=1SV=1;tr|D6RAZ8|D6RAZ8_HUMANAnnexin(Fragment)OS=HomosapiensGN=ANXA3PE=1SV=1;tr|D6RFJ9|D6RFJ9_HUMANAnnexinA3(Fragment)OS=HomosapiensGN=ANXA3PE=1SV=1	sp|P12429|ANXA3_HUMANAnnexinA3OS=HomosapiensGN=ANXA3PE=1SV=3	32;14;9;7;6	32;14;9;7;6	5;5;5;5;0		5	32	32	5	10	15	19	21	13	31	26	1	23	20	6	8	1	9	4	4	2	3	2	6	3	10	15	19	21	13	31	26	1	23	20	6	8	1	9	4	4	2	3	2
sp|P12724|ECP_HUMANEosinophilcationicproteinOS=HomosapiensGN=RNASE3PE=1SV=2	sp|P12724|ECP_HUMANEosinophilcationicproteinOS=HomosapiensGN=RNASE3PE=1SV=2	2	2	2		1	2	2	2	1	1	1	1	0	0	0	0	0	0	0	0	0	0	1	1	1	0	0	1	0	1	1	1	1	0	0	0	0	0	0	0	0	0	0	1	1	1	0	0
sp|P12814|ACTN1_HUMANAlpha-actinin-1OS=HomosapiensGN=ACTN1PE=1SV=2;tr|H9KV75|H9KV75_HUMANAlpha-actinin-1OS=HomosapiensGN=ACTN1PE=1SV=1;tr|H7C5W8|H7C5W8_HUMANAlpha-actinin-1(Fragment)OS=HomosapiensGN=ACTN1PE=1SV=1;sp|P35609|ACTN2_HUMANAlpha-actinin-2OS=HomosapiensGN=ACTN2PE=1SV=1;tr|H0YJ11|H0YJ11_HUMANAlpha-actinin-1(Fragment)OS=HomosapiensGN=ACTN1PE=1SV=1;tr|H0YJW3|H0YJW3_HUMANAlpha-actinin-1(Fra…	sp|P12814|ACTN1_HUMANAlpha-actinin-1OS=HomosapiensGN=ACTN1PE=1SV=2;tr|H9KV75|H9KV75_HUMANAlpha-actinin-1OS=HomosapiensGN=ACTN1PE=1SV=1	38;34;14;11;10;10;10;8;7;6;4;3;3	21;18;9;1;7;6;6;3;1;1;3;3;1	21;18;9;1;7;6;6;3;1;1;3;3;1	;	13	38	21	21	14	5	17	13	2	25	17	0	25	1	9	13	9	15	1	9	2	1	0	2	0	7	3	10	8	0	13	9	0	16	1	7	9	4	10	1	4	1	0	0
tr|B1AHC9|B1AHC9_HUMANX-rayrepaircross-complementingprotein6OS=HomosapiensGN=XRCC6PE=1SV=1;sp|P12956|XRCC6_HUMANX-rayrepaircross-complementingprotein6OS=HomosapiensGN=XRCC6PE=1SV=2	tr|B1AHC9|B1AHC9_HUMANX-rayrepaircross-complementingprotein6OS=HomosapiensGN=XRCC6PE=1SV=1;sp|P12956|XRCC6_HUMANX-rayrepaircross-complementingprotein6OS=HomosapiensGN=XRCC6PE=1SV=2	4;4	4;4	4;4	;	2	4	4	4	3	1	3	3	0	3	1	0	2	1	2	1	0	2	0	1	0	0	0	0	0	3	1	3	3	0	3	1	0	2	1	2	1	0	2	0	1	0	0	0
sp|P13010|XRCC5_HUMANX-rayrepaircross-complementingprotein5OS=HomosapiensGN=XRCC5PE=1SV=3	sp|P13010|XRCC5_HUMANX-rayrepaircross-complementingprotein5OS=HomosapiensGN=XRCC5PE=1SV=3	3	3	3		1	3	3	3	1	1	1	1	0	1	1	0	1	0	1	1	0	2	0	0	0	0	0	0	0	1	1	1	1	0	1	1	0	1	0	1	1	0	2	0	0	0	0	0
tr|Q86WV2|Q86WV2_HUMANCOX4I1proteinOS=HomosapiensGN=COX4I1PE=1SV=1;tr|H3BPG0|H3BPG0_HUMANCytochromecoxidasesubunit4isoform1,mitochondrial(Fragment)OS=HomosapiensGN=COX4I1PE=1SV=1;tr|H3BN72|H3BN72_HUMANCytochromecoxidasesubunit4isoform1,mitochondrialOS=HomosapiensGN=COX4I1PE=1SV=1;tr|H3BNV9|H3BNV9_HUMANCytochromecoxidasesubunit4isoform1,mitochondrialOS=HomosapiensGN=COX4I1PE=1SV=1;sp|P13073|COX41_…	tr|Q86WV2|Q86WV2_HUMANCOX4I1proteinOS=HomosapiensGN=COX4I1PE=1SV=1;tr|H3BPG0|H3BPG0_HUMANCytochromecoxidasesubunit4isoform1,mitochondrial(Fragment)OS=HomosapiensGN=COX4I1PE=1SV=1;tr|H3BN72|H3BN72_HUMANCytochromecoxidasesubunit4isoform1,mitochondrialOS=HomosapiensGN=COX4I1PE=1SV=1;tr|H3BNV9|H3BNV9_HUMANCytochromecoxidasesubunit4isoform1,mitochondrialOS=HomosapiensGN=COX4I1PE=1SV=1;sp|P13073|COX41_…	1;1;1;1;1	1;1;1;1;1	1;1;1;1;1	;;;;	5	1	1	1	0	0	0	0	0	0	0	0	1	0	0	0	0	1	0	0	0	0	0	1	0	0	0	0	0	0	0	0	0	1	0	0	0	0	1	0	0	0	0	0
sp|P13489|RINI_HUMANRibonucleaseinhibitorOS=HomosapiensGN=RNH1PE=1SV=2;tr|E9PMJ3|E9PMJ3_HUMANRibonucleaseinhibitor(Fragment)OS=HomosapiensGN=RNH1PE=1SV=1;tr|E9PLZ3|E9PLZ3_HUMANRibonucleaseinhibitor(Fragment)OS=HomosapiensGN=RNH1PE=1SV=1;tr|E9PIM9|E9PIM9_HUMANRibonucleaseinhibitor(Fragment)OS=HomosapiensGN=RNH1PE=1SV=1;tr|E9PIK5|E9PIK5_HUMANRibonucleaseinhibitor(Fragment)OS=HomosapiensGN=RNH1PE=1S…	sp|P13489|RINI_HUMANRibonucleaseinhibitorOS=HomosapiensGN=RNH1PE=1SV=2	18;8;8;8;7;7;5;4;2;2	18;8;8;8;7;7;5;4;2;2	18;8;8;8;7;7;5;4;2;2		10	18	18	18	8	6	9	7	6	10	8	0	11	8	8	9	5	9	0	5	1	0	0	0	1	8	6	9	7	6	10	8	0	11	8	8	9	5	9	0	5	1	0	0
sp|P13498|CY24A_HUMANCytochromeb-245lightchainOS=HomosapiensGN=CYBAPE=1SV=3	sp|P13498|CY24A_HUMANCytochromeb-245lightchainOS=HomosapiensGN=CYBAPE=1SV=3	3	3	3		1	3	3	3	2	1	1	2	1	1	1	0	1	0	3	2	1	3	3	1	0	2	0	2	2	2	1	1	2	1	1	1	0	1	0	3	2	1	3	3	1	0	2	0
sp|P13639|EF2_HUMANElongationfactor2OS=HomosapiensGN=EEF2PE=1SV=4;tr|K7EJ74|K7EJ74_HUMAN116kDaU5smallnuclearribonucleoproteincomponent(Fragment)OS=HomosapiensGN=EFTUD2PE=1SV=1;tr|K7EP67|K7EP67_HUMAN116kDaU5smallnuclearribonucleoproteincomponent(Fragment)OS=HomosapiensGN=EFTUD2PE=1SV=1;sp|Q15029|U5S1_HUMAN116kDaU5smallnuclearribonucleoproteincomponentOS=HomosapiensGN=EFTUD2PE=1SV=1	sp|P13639|EF2_HUMANElongationfactor2OS=HomosapiensGN=EEF2PE=1SV=4	28;1;1;1	28;1;1;1	28;1;1;1		4	28	28	28	15	5	7	8	2	17	15	1	18	7	4	6	13	13	1	11	3	0	0	1	3	15	5	7	8	2	17	15	1	18	7	4	6	13	13	1	11	3	0	0
sp|P13671|CO6_HUMANComplementcomponentC6OS=HomosapiensGN=C6PE=1SV=3	sp|P13671|CO6_HUMANComplementcomponentC6OS=HomosapiensGN=C6PE=1SV=3	12	12	12		1	12	12	12	2	1	1	0	0	3	2	0	1	0	3	2	8	2	1	5	6	0	0	1	0	2	1	1	0	0	3	2	0	1	0	3	2	8	2	1	5	6	0	0
tr|J3KPG2|J3KPG2_HUMANTranslationally-controlledtumorproteinOS=HomosapiensGN=TPT1PE=1SV=1;tr|E9PJF7|E9PJF7_HUMANTranslationally-controlledtumorprotein(Fragment)OS=HomosapiensGN=TPT1PE=1SV=1;sp|P13693|TCTP_HUMANTranslationally-controlledtumorproteinOS=HomosapiensGN=TPT1PE=1SV=1;tr|Q5W0H4|Q5W0H4_HUMANTranslationally-controlledtumorproteinOS=HomosapiensGN=TPT1PE=1SV=1;tr|A0A0B4J2C3|A0A0B4J2C3_HUMANT…	tr|J3KPG2|J3KPG2_HUMANTranslationally-controlledtumorproteinOS=HomosapiensGN=TPT1PE=1SV=1;tr|E9PJF7|E9PJF7_HUMANTranslationally-controlledtumorprotein(Fragment)OS=HomosapiensGN=TPT1PE=1SV=1;sp|P13693|TCTP_HUMANTranslationally-controlledtumorproteinOS=HomosapiensGN=TPT1PE=1SV=1;tr|Q5W0H4|Q5W0H4_HUMANTranslationally-controlledtumorproteinOS=HomosapiensGN=TPT1PE=1SV=1;tr|A0A0B4J2C3|A0A0B4J2C3_HUMANT…	2;2;2;2;2;1;1	2;2;2;2;2;1;1	2;2;2;2;2;1;1	;;;;;;	7	2	2	2	0	0	0	0	0	2	1	0	2	0	0	0	0	0	0	1	1	0	0	1	0	0	0	0	0	0	2	1	0	2	0	0	0	0	0	0	1	1	0	0
sp|P13726|TF_HUMANTissuefactorOS=HomosapiensGN=F3PE=1SV=1	sp|P13726|TF_HUMANTissuefactorOS=HomosapiensGN=F3PE=1SV=1	1	1	1		1	1	1	1	0	0	0	0	0	0	0	0	0	0	0	0	0	0	0	1	0	0	0	0	0	0	0	0	0	0	0	0	0	0	0	0	0	0	0	0	1	0	0	0
sp|P13727|PRG2_HUMANBonemarrowproteoglycanOS=HomosapiensGN=PRG2PE=1SV=2	sp|P13727|PRG2_HUMANBonemarrowproteoglycanOS=HomosapiensGN=PRG2PE=1SV=2	2	2	2		1	2	2	2	2	1	2	2	0	0	0	0	0	0	0	0	0	0	0	0	0	0	0	0	0	2	1	2	2	0	0	0	0	0	0	0	0	0	0	0	0	0	0	0
tr|A0A140T958|A0A140T958_HUMANHLAclassIIhistocompatibilityantigen,DRB1-16betachain(Fragment)OS=HomosapiensGN=HLA-DRB1PE=1SV=1;sp|P13761|2B17_HUMANHLAclassIIhistocompatibilityantigen,DRB1-7betachainOS=HomosapiensGN=HLA-DRB1PE=1SV=1;sp|Q9TQE0|2B19_HUMANHLAclassIIhistocompatibilityantigen,DRB1-9betachainOS=HomosapiensGN=HLA-DRB1PE=1SV=1;tr|A0A182DWH4|A0A182DWH4_HUMANHLAclassIIhistocompatibilityantig…	tr|A0A140T958|A0A140T958_HUMANHLAclassIIhistocompatibilityantigen,DRB1-16betachain(Fragment)OS=HomosapiensGN=HLA-DRB1PE=1SV=1;sp|P13761|2B17_HUMANHLAclassIIhistocompatibilityantigen,DRB1-7betachainOS=HomosapiensGN=HLA-DRB1PE=1SV=1;sp|Q9TQE0|2B19_HUMANHLAclassIIhistocompatibilityantigen,DRB1-9betachainOS=HomosapiensGN=HLA-DRB1PE=1SV=1	5;5;3;2;2;2	3;3;1;0;0;0	2;2;1;0;0;0	;;	6	5	3	2	2	1	1	1	0	1	0	0	0	1	1	2	1	1	1	4	1	0	0	0	0	1	0	0	0	0	1	0	0	0	1	0	1	0	0	0	3	1	0	0
sp|P13796|PLSL_HUMANPlastin-2OS=HomosapiensGN=LCP1PE=1SV=6;tr|Q5TBN3|Q5TBN3_HUMANPlastin-2(Fragment)OS=HomosapiensGN=LCP1PE=1SV=1;tr|Q5TBN5|Q5TBN5_HUMANPlastin-2(Fragment)OS=HomosapiensGN=LCP1PE=1SV=1	sp|P13796|PLSL_HUMANPlastin-2OS=HomosapiensGN=LCP1PE=1SV=6	39;9;2	39;9;2	33;6;2		3	39	39	33	25	16	23	22	7	27	25	0	27	19	12	17	13	20	9	14	7	3	2	10	2	25	16	23	22	7	27	25	0	27	19	12	17	13	20	9	14	7	3	2
tr|A0A0A0MSQ0|A0A0A0MSQ0_HUMANPlastin-3OS=HomosapiensGN=PLS3PE=1SV=1;sp|P13797|PLST_HUMANPlastin-3OS=HomosapiensGN=PLS3PE=1SV=4;tr|U3KQI3|U3KQI3_HUMANPlastin-3(Fragment)OS=HomosapiensGN=PLS3PE=1SV=1	tr|A0A0A0MSQ0|A0A0A0MSQ0_HUMANPlastin-3OS=HomosapiensGN=PLS3PE=1SV=1;sp|P13797|PLST_HUMANPlastin-3OS=HomosapiensGN=PLS3PE=1SV=4	9;9;4	3;3;1	1;1;1	;	3	9	3	1	5	3	5	5	2	8	6	0	8	4	2	7	3	7	2	1	0	1	1	2	1	1	0	1	1	0	3	1	0	3	1	0	2	0	2	0	0	0	0	0
sp|P13798|ACPH_HUMANAcylamino-acid-releasingenzymeOS=HomosapiensGN=APEHPE=1SV=4;tr|C9JIF9|C9JIF9_HUMANAcylamino-acid-releasingenzymeOS=HomosapiensGN=APEHPE=1SV=1;tr|C9JLK2|C9JLK2_HUMANAcylamino-acid-releasingenzyme(Fragment)OS=HomosapiensGN=APEHPE=1SV=1;tr|H7C393|H7C393_HUMANAcylamino-acid-releasingenzyme(Fragment)OS=HomosapiensGN=APEHPE=1SV=1;tr|H7C1U0|H7C1U0_HUMANAcylamino-acid-releasingenzyme(…	sp|P13798|ACPH_HUMANAcylamino-acid-releasingenzymeOS=HomosapiensGN=APEHPE=1SV=4;tr|C9JIF9|C9JIF9_HUMANAcylamino-acid-releasingenzymeOS=HomosapiensGN=APEHPE=1SV=1	4;4;1;1;1	4;4;1;1;1	4;4;1;1;1	;	5	4	4	4	1	1	2	1	0	2	1	0	1	0	1	0	0	1	0	0	0	0	0	2	0	1	1	2	1	0	2	1	0	1	0	1	0	0	1	0	0	0	0	0
tr|B4DTF2|B4DTF2_HUMANAnnexinOS=HomosapiensGN=ANXA8L1PE=1SV=1;sp|Q5VT79|AXA81_HUMANAnnexinA8-likeprotein1OS=HomosapiensGN=ANXA8L1PE=2SV=2;sp|P13928|ANXA8_HUMANAnnexinA8OS=HomosapiensGN=ANXA8PE=1SV=3	tr|B4DTF2|B4DTF2_HUMANAnnexinOS=HomosapiensGN=ANXA8L1PE=1SV=1;sp|Q5VT79|AXA81_HUMANAnnexinA8-likeprotein1OS=HomosapiensGN=ANXA8L1PE=2SV=2;sp|P13928|ANXA8_HUMANAnnexinA8OS=HomosapiensGN=ANXA8PE=1SV=3	1;1;1	1;1;1	1;1;1	;;	3	1	1	1	0	1	0	0	0	1	0	0	1	0	0	0	0	0	0	0	0	0	0	0	0	0	1	0	0	0	1	0	0	1	0	0	0	0	0	0	0	0	0	0
tr|E9PNW4|E9PNW4_HUMANCD59glycoproteinOS=HomosapiensGN=CD59PE=1SV=1;sp|P13987|CD59_HUMANCD59glycoproteinOS=HomosapiensGN=CD59PE=1SV=1;tr|E9PR17|E9PR17_HUMANCD59glycoproteinOS=HomosapiensGN=CD59PE=1SV=1;tr|H0YET2|H0YET2_HUMANCD59glycoprotein(Fragment)OS=HomosapiensGN=CD59PE=1SV=1	tr|E9PNW4|E9PNW4_HUMANCD59glycoproteinOS=HomosapiensGN=CD59PE=1SV=1;sp|P13987|CD59_HUMANCD59glycoproteinOS=HomosapiensGN=CD59PE=1SV=1;tr|E9PR17|E9PR17_HUMANCD59glycoproteinOS=HomosapiensGN=CD59PE=1SV=1	10;10;10;4	10;10;10;4	10;10;10;4	;;	4	10	10	10	4	3	6	7	1	7	4	0	6	3	2	1	2	2	0	10	9	1	0	1	0	4	3	6	7	1	7	4	0	6	3	2	1	2	2	0	10	9	1	0
sp|P14174|MIF_HUMANMacrophagemigrationinhibitoryfactorOS=HomosapiensGN=MIFPE=1SV=4	sp|P14174|MIF_HUMANMacrophagemigrationinhibitoryfactorOS=HomosapiensGN=MIFPE=1SV=4	3	3	3		1	3	3	3	1	0	1	1	2	2	3	0	1	1	0	0	1	0	0	2	2	0	1	1	0	1	0	1	1	2	2	3	0	1	1	0	0	1	0	0	2	2	0	1
tr|F8W111|F8W111_HUMANCarboxypeptidaseM(Fragment)OS=HomosapiensGN=CPMPE=1SV=1;sp|P14384|CBPM_HUMANCarboxypeptidaseMOS=HomosapiensGN=CPMPE=1SV=2;tr|H0YHN7|H0YHN7_HUMANCarboxypeptidaseM(Fragment)OS=HomosapiensGN=CPMPE=1SV=1	tr|F8W111|F8W111_HUMANCarboxypeptidaseM(Fragment)OS=HomosapiensGN=CPMPE=1SV=1;sp|P14384|CBPM_HUMANCarboxypeptidaseMOS=HomosapiensGN=CPMPE=1SV=2;tr|H0YHN7|H0YHN7_HUMANCarboxypeptidaseM(Fragment)OS=HomosapiensGN=CPMPE=1SV=1	2;2;1	2;2;1	2;2;1	;;	3	2	2	2	1	1	1	2	0	0	0	0	0	0	0	1	0	1	0	0	0	0	0	0	0	1	1	1	2	0	0	0	0	0	0	0	1	0	1	0	0	0	0	0
sp|P14406|CX7A2_HUMANCytochromecoxidasesubunit7A2,mitochondrialOS=HomosapiensGN=COX7A2PE=1SV=1;tr|D6RIE3|D6RIE3_HUMANCytochromecoxidasesubunit7A2,mitochondrialOS=HomosapiensGN=COX7A2PE=1SV=1;tr|D6RGV5|D6RGV5_HUMANCytochromecoxidasesubunit7A2,mitochondrial(Fragment)OS=HomosapiensGN=COX7A2PE=1SV=1;tr|H0UI06|H0UI06_HUMANCytochromecoxidasesubunit7A2,mitochondrialOS=HomosapiensGN=COX7A2PE=1SV=1;tr|D6R…	sp|P14406|CX7A2_HUMANCytochromecoxidasesubunit7A2,mitochondrialOS=HomosapiensGN=COX7A2PE=1SV=1;tr|D6RIE3|D6RIE3_HUMANCytochromecoxidasesubunit7A2,mitochondrialOS=HomosapiensGN=COX7A2PE=1SV=1;tr|D6RGV5|D6RGV5_HUMANCytochromecoxidasesubunit7A2,mitochondrial(Fragment)OS=HomosapiensGN=COX7A2PE=1SV=1;tr|H0UI06|H0UI06_HUMANCytochromecoxidasesubunit7A2,mitochondrialOS=HomosapiensGN=COX7A2PE=1SV=1;tr|D6R…	2;2;2;2;1	2;2;2;2;1	2;2;2;2;1	;;;;	5	2	2	2	2	0	0	0	0	0	0	0	0	0	0	1	1	1	0	0	0	0	0	0	0	2	0	0	0	0	0	0	0	0	0	0	1	1	1	0	0	0	0	0
sp|P14550|AK1A1_HUMANAlcoholdehydrogenase[NADP(+)]OS=HomosapiensGN=AKR1A1PE=1SV=3;tr|Q5T621|Q5T621_HUMANAlcoholdehydrogenase[NADP(+)](Fragment)OS=HomosapiensGN=AKR1A1PE=1SV=1;tr|V9GYG2|V9GYG2_HUMANAlcoholdehydrogenase[NADP(+)]OS=HomosapiensGN=AKR1A1PE=1SV=1;tr|V9GYP9|V9GYP9_HUMANAlcoholdehydrogenase[NADP(+)](Fragment)OS=HomosapiensGN=AKR1A1PE=1SV=1	sp|P14550|AK1A1_HUMANAlcoholdehydrogenase[NADP(+)]OS=HomosapiensGN=AKR1A1PE=1SV=3;tr|Q5T621|Q5T621_HUMANAlcoholdehydrogenase[NADP(+)](Fragment)OS=HomosapiensGN=AKR1A1PE=1SV=1	5;3;2;2	5;3;2;2	5;3;2;2	;	4	5	5	5	0	0	1	0	0	3	3	0	4	2	1	0	0	1	0	0	0	0	0	1	0	0	0	1	0	0	3	3	0	4	2	1	0	0	1	0	0	0	0	0
sp|P14618|KPYM_HUMANPyruvatekinasePKMOS=HomosapiensGN=PKMPE=1SV=4;tr|B4DNK4|B4DNK4_HUMANPyruvatekinaseOS=HomosapiensGN=PKMPE=1SV=1;tr|H3BTN5|H3BTN5_HUMANPyruvatekinase(Fragment)OS=HomosapiensGN=PKMPE=1SV=1;tr|H3BQ34|H3BQ34_HUMANPyruvatekinaseOS=HomosapiensGN=PKMPE=1SV=1;tr|H3BR70|H3BR70_HUMANPyruvatekinaseOS=HomosapiensGN=PKMPE=1SV=1;tr|H3BUW1|H3BUW1_HUMANPyruvatekinasePKM(Fragment)OS=Homosapiens…	sp|P14618|KPYM_HUMANPyruvatekinasePKMOS=HomosapiensGN=PKMPE=1SV=4;tr|B4DNK4|B4DNK4_HUMANPyruvatekinaseOS=HomosapiensGN=PKMPE=1SV=1;tr|H3BTN5|H3BTN5_HUMANPyruvatekinase(Fragment)OS=HomosapiensGN=PKMPE=1SV=1;tr|H3BQ34|H3BQ34_HUMANPyruvatekinaseOS=HomosapiensGN=PKMPE=1SV=1	35;29;28;22;17;11;11;10;4;2;2;1	35;29;28;22;17;11;11;10;4;2;2;1	35;29;28;22;17;11;11;10;4;2;2;1	;;;	12	35	35	35	19	14	20	18	11	32	27	6	29	23	12	12	10	17	2	16	7	2	1	3	1	19	14	20	18	11	32	27	6	29	23	12	12	10	17	2	16	7	2	1
sp|P14625|ENPL_HUMANEndoplasminOS=HomosapiensGN=HSP90B1PE=1SV=1;tr|Q96GW1|Q96GW1_HUMANEndoplasminOS=HomosapiensGN=HSP90B1PE=1SV=1;tr|A0A1W2PRR1|A0A1W2PRR1_HUMANEndoplasminOS=HomosapiensGN=HSP90B1PE=1SV=1;tr|F8W026|F8W026_HUMANEndoplasmin(Fragment)OS=HomosapiensGN=HSP90B1PE=1SV=8;tr|H0YIV0|H0YIV0_HUMANEndoplasmin(Fragment)OS=HomosapiensGN=HSP90B1PE=1SV=1	sp|P14625|ENPL_HUMANEndoplasminOS=HomosapiensGN=HSP90B1PE=1SV=1;tr|Q96GW1|Q96GW1_HUMANEndoplasminOS=HomosapiensGN=HSP90B1PE=1SV=1;tr|A0A1W2PRR1|A0A1W2PRR1_HUMANEndoplasminOS=HomosapiensGN=HSP90B1PE=1SV=1	13;9;9;3;1	11;7;7;1;1	11;7;7;1;1	;;	5	13	11	11	2	3	2	2	0	5	6	0	5	5	2	5	4	8	0	2	0	1	0	3	0	0	1	1	1	0	4	4	0	4	3	1	4	3	6	0	0	0	0	0
sp|P14780|MMP9_HUMANMatrixmetalloproteinase-9OS=HomosapiensGN=MMP9PE=1SV=3	sp|P14780|MMP9_HUMANMatrixmetalloproteinase-9OS=HomosapiensGN=MMP9PE=1SV=3	3	3	3		1	3	3	3	0	0	0	0	0	1	0	0	1	0	1	1	0	0	0	0	0	0	0	2	0	0	0	0	0	0	1	0	0	1	0	1	1	0	0	0	0	0	0	0
sp|P14902|I23O1_HUMANIndoleamine2,3-dioxygenase1OS=HomosapiensGN=IDO1PE=1SV=1	sp|P14902|I23O1_HUMANIndoleamine2,3-dioxygenase1OS=HomosapiensGN=IDO1PE=1SV=1	2	2	2		1	2	2	2	0	0	0	0	1	0	0	0	2	0	0	1	1	1	0	0	0	0	0	0	0	0	0	0	0	1	0	0	0	2	0	0	1	1	1	0	0	0	0	0
sp|P14927|QCR7_HUMANCytochromeb-c1complexsubunit7OS=HomosapiensGN=UQCRBPE=1SV=2	sp|P14927|QCR7_HUMANCytochromeb-c1complexsubunit7OS=HomosapiensGN=UQCRBPE=1SV=2	1	1	1		1	1	1	1	0	0	0	0	0	0	0	0	0	0	0	0	0	1	0	0	0	0	0	0	0	0	0	0	0	0	0	0	0	0	0	0	0	0	1	0	0	0	0	0
sp|P15090|FABP4_HUMANFattyacid-bindingprotein,adipocyteOS=HomosapiensGN=FABP4PE=1SV=3;tr|E5RIR0|E5RIR0_HUMANFattyacid-bindingprotein,adipocyteOS=HomosapiensGN=FABP4PE=1SV=1;tr|E5RH45|E5RH45_HUMANMyelinP2proteinOS=HomosapiensGN=PMP2PE=1SV=1;sp|P02689|MYP2_HUMANMyelinP2proteinOS=HomosapiensGN=PMP2PE=1SV=3	sp|P15090|FABP4_HUMANFattyacid-bindingprotein,adipocyteOS=HomosapiensGN=FABP4PE=1SV=3;tr|E5RIR0|E5RIR0_HUMANFattyacid-bindingprotein,adipocyteOS=HomosapiensGN=FABP4PE=1SV=1;tr|E5RH45|E5RH45_HUMANMyelinP2proteinOS=HomosapiensGN=PMP2PE=1SV=1;sp|P02689|MYP2_HUMANMyelinP2proteinOS=HomosapiensGN=PMP2PE=1SV=3	2;1;1;1	2;1;1;1	2;1;1;1	;;;	4	2	2	2	2	0	2	1	0	2	2	0	2	1	0	0	0	0	0	0	0	0	0	0	0	2	0	2	1	0	2	2	0	2	1	0	0	0	0	0	0	0	0	0
sp|P15144|AMPN_HUMANAminopeptidaseNOS=HomosapiensGN=ANPEPPE=1SV=4;tr|H0YLZ8|H0YLZ8_HUMANAminopeptidaseN(Fragment)OS=HomosapiensGN=ANPEPPE=1SV=1	sp|P15144|AMPN_HUMANAminopeptidaseNOS=HomosapiensGN=ANPEPPE=1SV=4	15;1	15;1	15;1		2	15	15	15	6	7	10	10	0	6	0	0	4	0	2	3	1	2	0	7	2	3	0	1	0	6	7	10	10	0	6	0	0	4	0	2	3	1	2	0	7	2	3	0
sp|P15153|RAC2_HUMANRas-relatedC3botulinumtoxinsubstrate2OS=HomosapiensGN=RAC2PE=1SV=1;tr|B1AH77|B1AH77_HUMANRas-relatedC3botulinumtoxinsubstrate2OS=HomosapiensGN=RAC2PE=1SV=1;tr|B1AH80|B1AH80_HUMANRas-relatedC3botulinumtoxinsubstrate2OS=HomosapiensGN=RAC2PE=1SV=1;tr|B1AH78|B1AH78_HUMANRas-relatedC3botulinumtoxinsubstrate2(Fragment)OS=HomosapiensGN=RAC2PE=1SV=1	sp|P15153|RAC2_HUMANRas-relatedC3botulinumtoxinsubstrate2OS=HomosapiensGN=RAC2PE=1SV=1;tr|B1AH77|B1AH77_HUMANRas-relatedC3botulinumtoxinsubstrate2OS=HomosapiensGN=RAC2PE=1SV=1;tr|B1AH80|B1AH80_HUMANRas-relatedC3botulinumtoxinsubstrate2OS=HomosapiensGN=RAC2PE=1SV=1;tr|B1AH78|B1AH78_HUMANRas-relatedC3botulinumtoxinsubstrate2(Fragment)OS=HomosapiensGN=RAC2PE=1SV=1	10;9;9;7	10;9;9;7	5;5;5;4	;;;	4	10	10	5	4	3	6	6	2	6	7	0	5	5	1	1	1	2	1	2	0	0	0	1	0	4	3	6	6	2	6	7	0	5	5	1	1	1	2	1	2	0	0	0
sp|P15169|CBPN_HUMANCarboxypeptidaseNcatalyticchainOS=HomosapiensGN=CPN1PE=1SV=1	sp|P15169|CBPN_HUMANCarboxypeptidaseNcatalyticchainOS=HomosapiensGN=CPN1PE=1SV=1	2	2	2		1	2	2	2	0	0	0	0	0	0	0	0	0	0	0	0	2	0	0	0	0	0	0	0	0	0	0	0	0	0	0	0	0	0	0	0	0	2	0	0	0	0	0	0
tr|E7EQR4|E7EQR4_HUMANEzrinOS=HomosapiensGN=EZRPE=1SV=3;sp|P15311|EZRI_HUMANEzrinOS=HomosapiensGN=EZRPE=1SV=4;sp|P35241|RADI_HUMANRadixinOS=HomosapiensGN=RDXPE=1SV=1	tr|E7EQR4|E7EQR4_HUMANEzrinOS=HomosapiensGN=EZRPE=1SV=3;sp|P15311|EZRI_HUMANEzrinOS=HomosapiensGN=EZRPE=1SV=4	45;45;11	45;45;11	35;35;1	;	3	45	45	35	22	18	23	26	3	22	12	0	16	8	9	16	7	13	5	27	21	15	14	18	1	22	18	23	26	3	22	12	0	16	8	9	16	7	13	5	27	21	15	14
sp|P15328|FOLR1_HUMANFolatereceptoralphaOS=HomosapiensGN=FOLR1PE=1SV=3	sp|P15328|FOLR1_HUMANFolatereceptoralphaOS=HomosapiensGN=FOLR1PE=1SV=3	8	8	8		1	8	8	8	0	0	0	1	0	2	0	0	0	0	1	1	0	1	0	7	8	1	0	0	0	0	0	0	1	0	2	0	0	0	0	1	1	0	1	0	7	8	1	0
tr|A0A087WTB8|A0A087WTB8_HUMANUbiquitincarboxyl-terminalhydrolaseOS=HomosapiensGN=UCHL3PE=1SV=1;sp|P15374|UCHL3_HUMANUbiquitincarboxyl-terminalhydrolaseisozymeL3OS=HomosapiensGN=UCHL3PE=1SV=1	tr|A0A087WTB8|A0A087WTB8_HUMANUbiquitincarboxyl-terminalhydrolaseOS=HomosapiensGN=UCHL3PE=1SV=1;sp|P15374|UCHL3_HUMANUbiquitincarboxyl-terminalhydrolaseisozymeL3OS=HomosapiensGN=UCHL3PE=1SV=1	1;1	1;1	1;1	;	2	1	1	1	0	0	0	0	0	0	0	0	0	0	0	1	0	1	0	0	0	0	0	0	0	0	0	0	0	0	0	0	0	0	0	0	1	0	1	0	0	0	0	0
tr|B4DLR8|B4DLR8_HUMANNAD(P)Hdehydrogenase[quinone]1OS=HomosapiensGN=NQO1PE=1SV=1;sp|P15559|NQO1_HUMANNAD(P)Hdehydrogenase[quinone]1OS=HomosapiensGN=NQO1PE=1SV=1;tr|H3BNV2|H3BNV2_HUMANNAD(P)Hdehydrogenase[quinone]1OS=HomosapiensGN=NQO1PE=1SV=1;tr|H3BRK3|H3BRK3_HUMANNAD(P)Hdehydrogenase[quinone]1OS=HomosapiensGN=NQO1PE=1SV=1	tr|B4DLR8|B4DLR8_HUMANNAD(P)Hdehydrogenase[quinone]1OS=HomosapiensGN=NQO1PE=1SV=1;sp|P15559|NQO1_HUMANNAD(P)Hdehydrogenase[quinone]1OS=HomosapiensGN=NQO1PE=1SV=1;tr|H3BNV2|H3BNV2_HUMANNAD(P)Hdehydrogenase[quinone]1OS=HomosapiensGN=NQO1PE=1SV=1;tr|H3BRK3|H3BRK3_HUMANNAD(P)Hdehydrogenase[quinone]1OS=HomosapiensGN=NQO1PE=1SV=1	6;6;5;5	6;6;5;5	6;6;5;5	;;;	4	6	6	6	2	1	2	2	0	3	1	0	3	1	1	3	1	2	0	1	1	1	1	2	0	2	1	2	2	0	3	1	0	3	1	1	3	1	2	0	1	1	1	1
tr|H0YEN5|H0YEN5_HUMAN40SribosomalproteinS2(Fragment)OS=HomosapiensGN=RPS2PE=1SV=1;sp|P15880|RS2_HUMAN40SribosomalproteinS2OS=HomosapiensGN=RPS2PE=1SV=2;tr|I3L404|I3L404_HUMAN40SribosomalproteinS2(Fragment)OS=HomosapiensGN=RPS2PE=1SV=1;tr|E9PM36|E9PM36_HUMAN40SribosomalproteinS2OS=HomosapiensGN=RPS2PE=1SV=1;tr|E9PMM9|E9PMM9_HUMAN40SribosomalproteinS2(Fragment)OS=HomosapiensGN=RPS2PE=1SV=1;tr|E9PQ…	tr|H0YEN5|H0YEN5_HUMAN40SribosomalproteinS2(Fragment)OS=HomosapiensGN=RPS2PE=1SV=1;sp|P15880|RS2_HUMAN40SribosomalproteinS2OS=HomosapiensGN=RPS2PE=1SV=2;tr|I3L404|I3L404_HUMAN40SribosomalproteinS2(Fragment)OS=HomosapiensGN=RPS2PE=1SV=1;tr|E9PM36|E9PM36_HUMAN40SribosomalproteinS2OS=HomosapiensGN=RPS2PE=1SV=1;tr|E9PMM9|E9PMM9_HUMAN40SribosomalproteinS2(Fragment)OS=HomosapiensGN=RPS2PE=1SV=1;tr|E9PQ…	5;5;3;3;3;3;1	5;5;3;3;3;3;1	5;5;3;3;3;3;1	;;;;;	7	5	5	5	1	0	1	1	0	5	2	0	3	1	1	1	1	1	0	2	0	0	0	1	0	1	0	1	1	0	5	2	0	3	1	1	1	1	1	0	2	0	0	0
tr|A0A0C4DGW3|A0A0C4DGW3_HUMANMucin-1OS=HomosapiensGN=MUC1PE=1SV=1;tr|A0A087X2A4|A0A087X2A4_HUMANMucin-1OS=HomosapiensGN=MUC1PE=1SV=1;sp|P15941|MUC1_HUMANMucin-1OS=HomosapiensGN=MUC1PE=1SV=3;tr|A0A087WWM1|A0A087WWM1_HUMANMucin-1OS=HomosapiensGN=MUC1PE=1SV=1;tr|A0A087WVJ0|A0A087WVJ0_HUMANMucin-1(Fragment)OS=HomosapiensGN=MUC1PE=1SV=1;tr|A0A0A0MSH4|A0A0A0MSH4_HUMANMucin-1OS=HomosapiensGN=MUC1PE=1SV…	tr|A0A0C4DGW3|A0A0C4DGW3_HUMANMucin-1OS=HomosapiensGN=MUC1PE=1SV=1;tr|A0A087X2A4|A0A087X2A4_HUMANMucin-1OS=HomosapiensGN=MUC1PE=1SV=1;sp|P15941|MUC1_HUMANMucin-1OS=HomosapiensGN=MUC1PE=1SV=3;tr|A0A087WWM1|A0A087WWM1_HUMANMucin-1OS=HomosapiensGN=MUC1PE=1SV=1;tr|A0A087WVJ0|A0A087WVJ0_HUMANMucin-1(Fragment)OS=HomosapiensGN=MUC1PE=1SV=1;tr|A0A0A0MSH4|A0A0A0MSH4_HUMANMucin-1OS=HomosapiensGN=MUC1PE=1SV…	8;8;8;8;7;7;6;6;5;3;3;3;3;3	8;8;8;8;7;7;6;6;5;3;3;3;3;3	8;8;8;8;7;7;6;6;5;3;3;3;3;3	;;;;;;;;	14	8	8	8	4	3	4	4	1	6	2	0	5	2	1	3	1	1	0	7	4	0	0	1	0	4	3	4	4	1	6	2	0	5	2	1	3	1	1	0	7	4	0	0
sp|P16050|LOX15_HUMANArachidonate15-lipoxygenaseOS=HomosapiensGN=ALOX15PE=1SV=3;tr|I3L175|I3L175_HUMANArachidonate15-lipoxygenase(Fragment)OS=HomosapiensGN=ALOX15PE=1SV=1	sp|P16050|LOX15_HUMANArachidonate15-lipoxygenaseOS=HomosapiensGN=ALOX15PE=1SV=3	21;1	21;1	21;1		2	21	21	21	16	12	13	15	3	13	5	0	13	5	7	5	0	8	0	7	3	0	0	1	0	16	12	13	15	3	13	5	0	13	5	7	5	0	8	0	7	3	0	0
tr|H0YD13|H0YD13_HUMANCD44antigenOS=HomosapiensGN=CD44PE=1SV=2;sp|P16070|CD44_HUMANCD44antigenOS=HomosapiensGN=CD44PE=1SV=3;tr|H0YDW7|H0YDW7_HUMANCD44antigen(Fragment)OS=HomosapiensGN=CD44PE=1SV=1;tr|H0YCV9|H0YCV9_HUMANCD44antigen(Fragment)OS=HomosapiensGN=CD44PE=1SV=1;tr|H0Y2P0|H0Y2P0_HUMANCD44antigen(Fragment)OS=HomosapiensGN=CD44PE=1SV=1;tr|H0Y5E4|H0Y5E4_HUMANCD44antigen(Fragment)OS=Homosapien…	tr|H0YD13|H0YD13_HUMANCD44antigenOS=HomosapiensGN=CD44PE=1SV=2;sp|P16070|CD44_HUMANCD44antigenOS=HomosapiensGN=CD44PE=1SV=3;tr|H0YDW7|H0YDW7_HUMANCD44antigen(Fragment)OS=HomosapiensGN=CD44PE=1SV=1;tr|H0YCV9|H0YCV9_HUMANCD44antigen(Fragment)OS=HomosapiensGN=CD44PE=1SV=1;tr|H0Y2P0|H0Y2P0_HUMANCD44antigen(Fragment)OS=HomosapiensGN=CD44PE=1SV=1;tr|H0Y5E4|H0Y5E4_HUMANCD44antigen(Fragment)OS=Homosapien…	6;6;4;4;4;4;3;2;2;2;2;1	6;6;4;4;4;4;3;2;2;2;2;1	6;6;4;4;4;4;3;2;2;2;2;1	;;;;;;	12	6	6	6	2	1	1	1	1	2	2	0	2	1	1	3	1	2	0	4	4	1	0	1	0	2	1	1	1	1	2	2	0	2	1	1	3	1	2	0	4	4	1	0
sp|P16152|CBR1_HUMANCarbonylreductase[NADPH]1OS=HomosapiensGN=CBR1PE=1SV=3;tr|E9PQ63|E9PQ63_HUMANCarbonylreductase[NADPH]1OS=HomosapiensGN=CBR1PE=1SV=1;tr|A8MTM1|A8MTM1_HUMANCarbonylreductase[NADPH]1OS=HomosapiensGN=CBR1PE=1SV=1	sp|P16152|CBR1_HUMANCarbonylreductase[NADPH]1OS=HomosapiensGN=CBR1PE=1SV=3;tr|E9PQ63|E9PQ63_HUMANCarbonylreductase[NADPH]1OS=HomosapiensGN=CBR1PE=1SV=1;tr|A8MTM1|A8MTM1_HUMANCarbonylreductase[NADPH]1OS=HomosapiensGN=CBR1PE=1SV=1	15;10;10	15;10;10	12;7;7	;;	3	15	15	12	9	2	7	6	2	12	13	0	13	12	2	5	2	5	0	3	0	0	1	0	0	9	2	7	6	2	12	13	0	13	12	2	5	2	5	0	3	0	0	1
sp|P16157|ANK1_HUMANAnkyrin-1OS=HomosapiensGN=ANK1PE=1SV=3	sp|P16157|ANK1_HUMANAnkyrin-1OS=HomosapiensGN=ANK1PE=1SV=3	1	1	1		1	1	1	1	0	0	0	0	0	1	0	0	1	0	0	0	0	0	0	1	1	0	0	0	0	0	0	0	0	0	1	0	0	1	0	0	0	0	0	0	1	1	0	0
sp|P16401|H15_HUMANHistoneH1.5OS=HomosapiensGN=HIST1H1BPE=1SV=3	sp|P16401|H15_HUMANHistoneH1.5OS=HomosapiensGN=HIST1H1BPE=1SV=3	6	3	3		1	6	3	3	2	2	5	2	0	4	2	1	3	1	2	0	0	2	0	3	2	1	1	0	0	2	2	3	2	0	1	1	0	1	1	2	0	0	2	0	1	1	0	0
sp|P16402|H13_HUMANHistoneH1.3OS=HomosapiensGN=HIST1H1DPE=1SV=2	sp|P16402|H13_HUMANHistoneH1.3OS=HomosapiensGN=HIST1H1DPE=1SV=2	9	9	1		1	9	9	1	5	5	6	4	0	9	6	1	6	4	2	0	0	1	0	5	4	1	1	0	0	5	5	6	4	0	9	6	1	6	4	2	0	0	1	0	5	4	1	1
sp|P16403|H12_HUMANHistoneH1.2OS=HomosapiensGN=HIST1H1CPE=1SV=2	sp|P16403|H12_HUMANHistoneH1.2OS=HomosapiensGN=HIST1H1CPE=1SV=2	8	1	1		1	8	1	1	5	4	5	3	0	7	5	1	5	4	2	0	0	0	0	4	3	1	1	0	0	1	0	0	0	0	0	0	0	0	0	1	0	0	0	0	0	0	0	0
tr|E7EMD0|E7EMD0_HUMANNADPH--cytochromeP450reductaseOS=HomosapiensGN=PORPE=1SV=1;sp|P16435|NCPR_HUMANNADPH--cytochromeP450reductaseOS=HomosapiensGN=PORPE=1SV=2;tr|H0Y4R2|H0Y4R2_HUMANNADPH--cytochromeP450reductase(Fragment)OS=HomosapiensGN=PORPE=1SV=1	tr|E7EMD0|E7EMD0_HUMANNADPH--cytochromeP450reductaseOS=HomosapiensGN=PORPE=1SV=1;sp|P16435|NCPR_HUMANNADPH--cytochromeP450reductaseOS=HomosapiensGN=PORPE=1SV=2;tr|H0Y4R2|H0Y4R2_HUMANNADPH--cytochromeP450reductase(Fragment)OS=HomosapiensGN=PORPE=1SV=1	2;2;2	2;2;2	2;2;2	;;	3	2	2	2	1	0	0	0	0	1	0	0	1	1	0	0	0	2	0	0	0	0	0	0	0	1	0	0	0	0	1	0	0	1	1	0	0	0	2	0	0	0	0	0
tr|H7C5W9|H7C5W9_HUMANSarcoplasmic/endoplasmicreticulumcalciumATPase2(Fragment)OS=HomosapiensGN=ATP2A2PE=1SV=1;sp|P16615|AT2A2_HUMANSarcoplasmic/endoplasmicreticulumcalciumATPase2OS=HomosapiensGN=ATP2A2PE=1SV=1;sp|O14983|AT2A1_HUMANSarcoplasmic/endoplasmicreticulumcalciumATPase1OS=HomosapiensGN=ATP2A1PE=1SV=1;sp|Q93084|AT2A3_HUMANSarcoplasmic/endoplasmicreticulumcalciumATPase3OS=HomosapiensGN=ATP…	tr|H7C5W9|H7C5W9_HUMANSarcoplasmic/endoplasmicreticulumcalciumATPase2(Fragment)OS=HomosapiensGN=ATP2A2PE=1SV=1;sp|P16615|AT2A2_HUMANSarcoplasmic/endoplasmicreticulumcalciumATPase2OS=HomosapiensGN=ATP2A2PE=1SV=1;sp|O14983|AT2A1_HUMANSarcoplasmic/endoplasmicreticulumcalciumATPase1OS=HomosapiensGN=ATP2A1PE=1SV=1;sp|Q93084|AT2A3_HUMANSarcoplasmic/endoplasmicreticulumcalciumATPase3OS=HomosapiensGN=ATP…	2;2;1;1	2;2;1;1	2;2;1;1	;;;	4	2	2	2	1	0	0	0	0	0	0	0	0	0	1	2	1	2	0	0	0	0	0	0	0	1	0	0	0	0	0	0	0	0	0	1	2	1	2	0	0	0	0	0
tr|E9PLT1|E9PLT1_HUMANPlateletglycoprotein4OS=HomosapiensGN=CD36PE=1SV=1;tr|E7EU05|E7EU05_HUMANPlateletglycoprotein4(Fragment)OS=HomosapiensGN=CD36PE=1SV=2;sp|P16671|CD36_HUMANPlateletglycoprotein4OS=HomosapiensGN=CD36PE=1SV=2	tr|E9PLT1|E9PLT1_HUMANPlateletglycoprotein4OS=HomosapiensGN=CD36PE=1SV=1;tr|E7EU05|E7EU05_HUMANPlateletglycoprotein4(Fragment)OS=HomosapiensGN=CD36PE=1SV=2;sp|P16671|CD36_HUMANPlateletglycoprotein4OS=HomosapiensGN=CD36PE=1SV=2	2;2;2	2;2;2	2;2;2	;;	3	2	2	2	1	1	2	2	0	1	0	0	1	0	1	1	0	1	0	0	0	0	0	0	0	1	1	2	2	0	1	0	0	1	0	1	1	0	1	0	0	0	0	0
sp|P17066|HSP76_HUMANHeatshock70kDaprotein6OS=HomosapiensGN=HSPA6PE=1SV=2;sp|P48741|HSP77_HUMANPutativeheatshock70kDaprotein7OS=HomosapiensGN=HSPA7PE=5SV=2	sp|P17066|HSP76_HUMANHeatshock70kDaprotein6OS=HomosapiensGN=HSPA6PE=1SV=2;sp|P48741|HSP77_HUMANPutativeheatshock70kDaprotein7OS=HomosapiensGN=HSPA7PE=5SV=2	11;6	2;2	2;2	;	2	11	2	2	4	2	6	4	1	10	7	3	6	6	2	4	3	6	1	6	3	0	0	1	0	1	1	1	1	1	2	2	1	1	1	1	1	1	1	0	0	1	0	0
sp|P17174|AATC_HUMANAspartateaminotransferase,cytoplasmicOS=HomosapiensGN=GOT1PE=1SV=3	sp|P17174|AATC_HUMANAspartateaminotransferase,cytoplasmicOS=HomosapiensGN=GOT1PE=1SV=3	7	7	7		1	7	7	7	0	0	1	0	0	5	3	0	5	1	0	1	0	1	0	0	0	0	1	0	0	0	0	1	0	0	5	3	0	5	1	0	1	0	1	0	0	0	0	1
sp|P17213|BPI_HUMANBactericidalpermeability-increasingproteinOS=HomosapiensGN=BPIPE=1SV=4;tr|H0Y738|H0Y738_HUMANBactericidalpermeability-increasingproteinOS=HomosapiensGN=BPIPE=1SV=2;tr|A0A0D9SFX6|A0A0D9SFX6_HUMANBactericidalpermeability-increasingproteinOS=HomosapiensGN=BPIPE=1SV=1	sp|P17213|BPI_HUMANBactericidalpermeability-increasingproteinOS=HomosapiensGN=BPIPE=1SV=4;tr|H0Y738|H0Y738_HUMANBactericidalpermeability-increasingproteinOS=HomosapiensGN=BPIPE=1SV=2	8;5;1	8;5;1	8;5;1	;	3	8	8	8	4	2	5	6	1	5	1	0	3	0	4	4	0	3	2	0	1	1	0	2	1	4	2	5	6	1	5	1	0	3	0	4	4	0	3	2	0	1	1	0
sp|P17655|CAN2_HUMANCalpain-2catalyticsubunitOS=HomosapiensGN=CAPN2PE=1SV=6	sp|P17655|CAN2_HUMANCalpain-2catalyticsubunitOS=HomosapiensGN=CAPN2PE=1SV=6	7	7	7		1	7	7	7	6	3	3	2	1	3	4	0	5	3	3	4	0	5	0	0	0	0	0	1	0	6	3	3	2	1	3	4	0	5	3	3	4	0	5	0	0	0	0	0
sp|P17858|PFKAL_HUMANATP-dependent6-phosphofructokinase,livertypeOS=HomosapiensGN=PFKLPE=1SV=6;sp|P08237|PFKAM_HUMANATP-dependent6-phosphofructokinase,muscletypeOS=HomosapiensGN=PFKMPE=1SV=2	sp|P17858|PFKAL_HUMANATP-dependent6-phosphofructokinase,livertypeOS=HomosapiensGN=PFKLPE=1SV=6	7;1	7;1	7;1		2	7	7	7	4	0	0	0	0	6	3	0	5	0	0	2	1	2	0	0	0	0	0	0	0	4	0	0	0	0	6	3	0	5	0	0	2	1	2	0	0	0	0	0
sp|P17931|LEG3_HUMANGalectin-3OS=HomosapiensGN=LGALS3PE=1SV=5;tr|G3V3R6|G3V3R6_HUMANGalectinOS=HomosapiensGN=LGALS3PE=1SV=1	sp|P17931|LEG3_HUMANGalectin-3OS=HomosapiensGN=LGALS3PE=1SV=5;tr|G3V3R6|G3V3R6_HUMANGalectinOS=HomosapiensGN=LGALS3PE=1SV=1	8;5	8;5	8;5	;	2	8	8	8	5	3	5	5	2	7	5	1	5	4	0	2	1	4	0	6	4	1	2	1	0	5	3	5	5	2	7	5	1	5	4	0	2	1	4	0	6	4	1	2
tr|C9JMX4|C9JMX4_HUMANInsulin-likegrowthfactor-bindingprotein3(Fragment)OS=HomosapiensGN=IGFBP3PE=1SV=1;tr|H0Y485|H0Y485_HUMANInsulin-likegrowthfactor-bindingprotein3(Fragment)OS=HomosapiensGN=IGFBP3PE=1SV=1;tr|H0Y5K2|H0Y5K2_HUMANInsulin-likegrowthfactor-bindingprotein3(Fragment)OS=HomosapiensGN=IGFBP3PE=1SV=1;tr|B3KWK7|B3KWK7_HUMANInsulin-likegrowthfactorbindingprotein3,isoformCRA_bOS=Homosapien…	tr|C9JMX4|C9JMX4_HUMANInsulin-likegrowthfactor-bindingprotein3(Fragment)OS=HomosapiensGN=IGFBP3PE=1SV=1;tr|H0Y485|H0Y485_HUMANInsulin-likegrowthfactor-bindingprotein3(Fragment)OS=HomosapiensGN=IGFBP3PE=1SV=1;tr|H0Y5K2|H0Y5K2_HUMANInsulin-likegrowthfactor-bindingprotein3(Fragment)OS=HomosapiensGN=IGFBP3PE=1SV=1;tr|B3KWK7|B3KWK7_HUMANInsulin-likegrowthfactorbindingprotein3,isoformCRA_bOS=Homosapien…	1;1;1;1;1;1;1	1;1;1;1;1;1;1	1;1;1;1;1;1;1	;;;;;;	7	1	1	1	0	0	0	0	0	0	0	0	0	0	0	0	1	0	0	0	0	0	0	0	0	0	0	0	0	0	0	0	0	0	0	0	0	1	0	0	0	0	0	0
tr|E9PM69|E9PM69_HUMAN26Sproteasomeregulatorysubunit6AOS=HomosapiensGN=PSMC3PE=1SV=1;tr|R4GNH3|R4GNH3_HUMAN26Sproteasomeregulatorysubunit6AOS=HomosapiensGN=PSMC3PE=1SV=1;sp|P17980|PRS6A_HUMAN26Sproteasomeregulatorysubunit6AOS=HomosapiensGN=PSMC3PE=1SV=3;tr|E9PN50|E9PN50_HUMAN26Sproteasomeregulatorysubunit6A(Fragment)OS=HomosapiensGN=PSMC3PE=1SV=9;tr|E9PMD8|E9PMD8_HUMAN26Sproteasomeregulatorysubun…	tr|E9PM69|E9PM69_HUMAN26Sproteasomeregulatorysubunit6AOS=HomosapiensGN=PSMC3PE=1SV=1;tr|R4GNH3|R4GNH3_HUMAN26Sproteasomeregulatorysubunit6AOS=HomosapiensGN=PSMC3PE=1SV=1;sp|P17980|PRS6A_HUMAN26Sproteasomeregulatorysubunit6AOS=HomosapiensGN=PSMC3PE=1SV=3;tr|E9PN50|E9PN50_HUMAN26Sproteasomeregulatorysubunit6A(Fragment)OS=HomosapiensGN=PSMC3PE=1SV=9;tr|E9PMD8|E9PMD8_HUMAN26Sproteasomeregulatorysubun…	2;2;2;1;1;1	2;2;2;1;1;1	2;2;2;1;1;1	;;;;;	6	2	2	2	1	1	1	0	0	1	1	0	1	1	1	1	0	1	0	0	0	0	0	0	0	1	1	1	0	0	1	1	0	1	1	1	1	0	1	0	0	0	0	0
sp|P17987|TCPA_HUMANT-complexprotein1subunitalphaOS=HomosapiensGN=TCP1PE=1SV=1;tr|E7EQR6|E7EQR6_HUMANT-complexprotein1subunitalphaOS=HomosapiensGN=TCP1PE=1SV=1;tr|F5H282|F5H282_HUMANT-complexprotein1subunitalphaOS=HomosapiensGN=TCP1PE=1SV=1;tr|E7ERF2|E7ERF2_HUMANT-complexprotein1subunitalphaOS=HomosapiensGN=TCP1PE=1SV=1;tr|F5GZI8|F5GZI8_HUMANT-complexprotein1subunitalphaOS=HomosapiensGN=TCP1PE=1S…	sp|P17987|TCPA_HUMANT-complexprotein1subunitalphaOS=HomosapiensGN=TCP1PE=1SV=1;tr|E7EQR6|E7EQR6_HUMANT-complexprotein1subunitalphaOS=HomosapiensGN=TCP1PE=1SV=1;tr|F5H282|F5H282_HUMANT-complexprotein1subunitalphaOS=HomosapiensGN=TCP1PE=1SV=1;tr|E7ERF2|E7ERF2_HUMANT-complexprotein1subunitalphaOS=HomosapiensGN=TCP1PE=1SV=1	15;10;9;9;5;4;3;3;3;3	15;10;9;9;5;4;3;3;3;3	15;10;9;9;5;4;3;3;3;3	;;;	10	15	15	15	4	3	6	4	1	12	3	0	13	3	3	4	2	5	2	3	0	0	1	0	0	4	3	6	4	1	12	3	0	13	3	3	4	2	5	2	3	0	0	1
tr|F8WBS5|F8WBS5_HUMAN60SribosomalproteinL35aOS=HomosapiensGN=RPL35APE=1SV=1;tr|F8WB72|F8WB72_HUMAN60SribosomalproteinL35aOS=HomosapiensGN=RPL35APE=1SV=1;tr|C9K025|C9K025_HUMAN60SribosomalproteinL35a(Fragment)OS=HomosapiensGN=RPL35APE=1SV=1;sp|P18077|RL35A_HUMAN60SribosomalproteinL35aOS=HomosapiensGN=RPL35APE=1SV=2	tr|F8WBS5|F8WBS5_HUMAN60SribosomalproteinL35aOS=HomosapiensGN=RPL35APE=1SV=1;tr|F8WB72|F8WB72_HUMAN60SribosomalproteinL35aOS=HomosapiensGN=RPL35APE=1SV=1;tr|C9K025|C9K025_HUMAN60SribosomalproteinL35a(Fragment)OS=HomosapiensGN=RPL35APE=1SV=1;sp|P18077|RL35A_HUMAN60SribosomalproteinL35aOS=HomosapiensGN=RPL35APE=1SV=2	2;2;2;2	2;2;2;2	2;2;2;2	;;;	4	2	2	2	0	0	0	0	0	1	1	0	1	1	1	0	1	0	0	0	0	0	0	0	0	0	0	0	0	0	1	1	0	1	1	1	0	1	0	0	0	0	0	0
tr|C9JPM4|C9JPM4_HUMANADP-ribosylationfactor4(Fragment)OS=HomosapiensGN=ARF4PE=1SV=1;sp|P18085|ARF4_HUMANADP-ribosylationfactor4OS=HomosapiensGN=ARF4PE=1SV=3;tr|C9JAK5|C9JAK5_HUMANADP-ribosylationfactor4OS=HomosapiensGN=ARF4PE=1SV=1;tr|F5H1V1|F5H1V1_HUMANADP-ribosylationfactor3(Fragment)OS=HomosapiensGN=ARF3PE=4SV=1;tr|F5H6T5|F5H6T5_HUMANADP-ribosylationfactor3(Fragment)OS=HomosapiensGN=ARF3PE=4S…	tr|C9JPM4|C9JPM4_HUMANADP-ribosylationfactor4(Fragment)OS=HomosapiensGN=ARF4PE=1SV=1;sp|P18085|ARF4_HUMANADP-ribosylationfactor4OS=HomosapiensGN=ARF4PE=1SV=3;tr|C9JAK5|C9JAK5_HUMANADP-ribosylationfactor4OS=HomosapiensGN=ARF4PE=1SV=1	3;3;2;1;1;1	1;1;1;0;0;0	1;1;1;0;0;0	;;	6	3	1	1	3	2	3	3	0	0	0	0	1	2	1	1	0	1	1	0	0	1	0	0	0	1	1	1	1	0	0	0	0	1	0	1	1	0	1	1	0	0	1	0
sp|P18124|RL7_HUMAN60SribosomalproteinL7OS=HomosapiensGN=RPL7PE=1SV=1;tr|A8MUD9|A8MUD9_HUMAN60SribosomalproteinL7OS=HomosapiensGN=RPL7PE=1SV=1;tr|C9JZ88|C9JZ88_HUMAN60SribosomalproteinL7(Fragment)OS=HomosapiensGN=RPL7PE=1SV=1;tr|C9JIJ5|C9JIJ5_HUMAN60SribosomalproteinL7(Fragment)OS=HomosapiensGN=RPL7PE=1SV=1	sp|P18124|RL7_HUMAN60SribosomalproteinL7OS=HomosapiensGN=RPL7PE=1SV=1;tr|A8MUD9|A8MUD9_HUMAN60SribosomalproteinL7OS=HomosapiensGN=RPL7PE=1SV=1	7;5;1;1	7;5;1;1	7;5;1;1	;	4	7	7	7	2	2	2	3	0	6	1	0	1	0	2	1	2	3	0	0	0	0	0	0	0	2	2	2	3	0	6	1	0	1	0	2	1	2	3	0	0	0	0	0
sp|P18206|VINC_HUMANVinculinOS=HomosapiensGN=VCLPE=1SV=4	sp|P18206|VINC_HUMANVinculinOS=HomosapiensGN=VCLPE=1SV=4	2	2	2		1	2	2	2	1	0	0	0	0	0	0	0	0	0	1	1	2	1	0	1	0	0	0	0	0	1	0	0	0	0	0	0	0	0	0	1	1	2	1	0	1	0	0	0
tr|A0A087WXM6|A0A087WXM6_HUMAN60SribosomalproteinL17(Fragment)OS=HomosapiensGN=RPL17PE=3SV=1;tr|J3QQT2|J3QQT2_HUMAN60SribosomalproteinL17(Fragment)OS=HomosapiensGN=RPL17PE=3SV=1;tr|J3QLC8|J3QLC8_HUMAN60SribosomalproteinL17OS=HomosapiensGN=RPL17PE=3SV=1;tr|J3KRX5|J3KRX5_HUMAN60SribosomalproteinL17(Fragment)OS=HomosapiensGN=RPL17PE=3SV=1;sp|P18621|RL17_HUMAN60SribosomalproteinL17OS=HomosapiensGN=RP…	tr|A0A087WXM6|A0A087WXM6_HUMAN60SribosomalproteinL17(Fragment)OS=HomosapiensGN=RPL17PE=3SV=1;tr|J3QQT2|J3QQT2_HUMAN60SribosomalproteinL17(Fragment)OS=HomosapiensGN=RPL17PE=3SV=1;tr|J3QLC8|J3QLC8_HUMAN60SribosomalproteinL17OS=HomosapiensGN=RPL17PE=3SV=1;tr|J3KRX5|J3KRX5_HUMAN60SribosomalproteinL17(Fragment)OS=HomosapiensGN=RPL17PE=3SV=1;sp|P18621|RL17_HUMAN60SribosomalproteinL17OS=HomosapiensGN=RP…	1;1;1;1;1;1;1	1;1;1;1;1;1;1	1;1;1;1;1;1;1	;;;;;;	7	1	1	1	0	0	0	0	0	0	0	0	0	0	0	0	1	0	0	0	0	0	0	0	0	0	0	0	0	0	0	0	0	0	0	0	0	1	0	0	0	0	0	0
sp|P18669|PGAM1_HUMANPhosphoglyceratemutase1OS=HomosapiensGN=PGAM1PE=1SV=2;sp|P15259|PGAM2_HUMANPhosphoglyceratemutase2OS=HomosapiensGN=PGAM2PE=1SV=3;sp|Q8N0Y7|PGAM4_HUMANProbablephosphoglyceratemutase4OS=HomosapiensGN=PGAM4PE=3SV=1	sp|P18669|PGAM1_HUMANPhosphoglyceratemutase1OS=HomosapiensGN=PGAM1PE=1SV=2	10;4;4	10;4;4	10;4;4		3	10	10	10	5	4	6	4	1	7	7	1	7	5	5	6	2	6	1	4	2	2	1	1	0	5	4	6	4	1	7	7	1	7	5	5	6	2	6	1	4	2	2	1
sp|P18859|ATP5J_HUMANATPsynthase-couplingfactor6,mitochondrialOS=HomosapiensGN=ATP5JPE=1SV=1;tr|A8MUH2|A8MUH2_HUMANATPsynthase-couplingfactor6,mitochondrialOS=HomosapiensGN=ATP5JPE=1SV=1	sp|P18859|ATP5J_HUMANATPsynthase-couplingfactor6,mitochondrialOS=HomosapiensGN=ATP5JPE=1SV=1;tr|A8MUH2|A8MUH2_HUMANATPsynthase-couplingfactor6,mitochondrialOS=HomosapiensGN=ATP5JPE=1SV=1	3;2	3;2	3;2	;	2	3	3	3	1	0	1	0	0	0	0	0	1	0	0	2	0	3	0	0	0	0	0	0	0	1	0	1	0	0	0	0	0	1	0	0	2	0	3	0	0	0	0	0
sp|P19075|TSN8_HUMANTetraspanin-8OS=HomosapiensGN=TSPAN8PE=1SV=1	sp|P19075|TSN8_HUMANTetraspanin-8OS=HomosapiensGN=TSPAN8PE=1SV=1	2	2	2		1	2	2	2	0	0	0	0	0	0	0	0	0	0	0	0	0	0	0	2	1	0	0	0	0	0	0	0	0	0	0	0	0	0	0	0	0	0	0	0	2	1	0	0
tr|H7BY16|H7BY16_HUMANNucleolin(Fragment)OS=HomosapiensGN=NCLPE=1SV=8;sp|P19338|NUCL_HUMANNucleolinOS=HomosapiensGN=NCLPE=1SV=3	tr|H7BY16|H7BY16_HUMANNucleolin(Fragment)OS=HomosapiensGN=NCLPE=1SV=8;sp|P19338|NUCL_HUMANNucleolinOS=HomosapiensGN=NCLPE=1SV=3	1;1	1;1	1;1	;	2	1	1	1	1	1	1	1	0	0	0	0	0	0	0	0	0	0	0	0	0	0	0	0	0	1	1	1	1	0	0	0	0	0	0	0	0	0	0	0	0	0	0	0
sp|P19367|HXK1_HUMANHexokinase-1OS=HomosapiensGN=HK1PE=1SV=3;tr|B1AR62|B1AR62_HUMANPhosphotransferase(Fragment)OS=HomosapiensGN=HK1PE=1SV=1;tr|B1AR61|B1AR61_HUMANPhosphotransferase(Fragment)OS=HomosapiensGN=HK1PE=1SV=1;tr|B1AR63|B1AR63_HUMANPhosphotransferase(Fragment)OS=HomosapiensGN=HK1PE=1SV=8	sp|P19367|HXK1_HUMANHexokinase-1OS=HomosapiensGN=HK1PE=1SV=3;tr|B1AR62|B1AR62_HUMANPhosphotransferase(Fragment)OS=HomosapiensGN=HK1PE=1SV=1;tr|B1AR61|B1AR61_HUMANPhosphotransferase(Fragment)OS=HomosapiensGN=HK1PE=1SV=1;tr|B1AR63|B1AR63_HUMANPhosphotransferase(Fragment)OS=HomosapiensGN=HK1PE=1SV=8	6;3;3;3	4;2;2;2	4;2;2;2	;;;	4	6	4	4	0	0	0	0	0	6	4	0	3	0	0	0	0	0	0	1	1	0	0	0	0	0	0	0	0	0	4	2	0	2	0	0	0	0	0	0	1	1	0	0
sp|P19397|CD53_HUMANLeukocytesurfaceantigenCD53OS=HomosapiensGN=CD53PE=1SV=1	sp|P19397|CD53_HUMANLeukocytesurfaceantigenCD53OS=HomosapiensGN=CD53PE=1SV=1	1	1	1		1	1	1	1	1	1	0	0	0	1	0	0	1	0	1	1	1	1	1	0	1	0	0	1	1	1	1	0	0	0	1	0	0	1	0	1	1	1	1	1	0	1	0	0
tr|E7ET76|E7ET76_HUMANGamma-glutamyltranspeptidase1(Fragment)OS=HomosapiensGN=GGT1PE=1SV=1;sp|P19440|GGT1_HUMANGlutathionehydrolase1proenzymeOS=HomosapiensGN=GGT1PE=1SV=2;tr|E7ETR7|E7ETR7_HUMANGamma-glutamyltranspeptidase1(Fragment)OS=HomosapiensGN=GGT1PE=1SV=1;tr|B5MCK8|B5MCK8_HUMANInactivegamma-glutamyltranspeptidase2OS=HomosapiensGN=GGT2PE=4SV=2;sp|A6NGU5|GGT3_HUMANPutativeglutathionehydrolase…	tr|E7ET76|E7ET76_HUMANGamma-glutamyltranspeptidase1(Fragment)OS=HomosapiensGN=GGT1PE=1SV=1;sp|P19440|GGT1_HUMANGlutathionehydrolase1proenzymeOS=HomosapiensGN=GGT1PE=1SV=2;tr|E7ETR7|E7ETR7_HUMANGamma-glutamyltranspeptidase1(Fragment)OS=HomosapiensGN=GGT1PE=1SV=1;tr|B5MCK8|B5MCK8_HUMANInactivegamma-glutamyltranspeptidase2OS=HomosapiensGN=GGT2PE=4SV=2;sp|A6NGU5|GGT3_HUMANPutativeglutathionehydrolase…	4;4;3;3;3;3	4;4;3;3;3;3	4;4;3;3;3;3	;;;;;	6	4	4	4	1	3	3	3	0	1	1	0	1	0	0	0	0	0	0	2	3	0	0	0	1	1	3	3	3	0	1	1	0	1	0	0	0	0	0	0	2	3	0	0
sp|P19652|A1AG2_HUMANAlpha-1-acidglycoprotein2OS=HomosapiensGN=ORM2PE=1SV=2	sp|P19652|A1AG2_HUMANAlpha-1-acidglycoprotein2OS=HomosapiensGN=ORM2PE=1SV=2	9	5	5		1	9	5	5	0	0	0	0	0	0	0	0	0	0	1	0	4	0	1	3	7	0	0	1	0	0	0	0	0	0	0	0	0	0	0	0	0	3	0	0	3	4	0	0
tr|Q5T985|Q5T985_HUMANInter-alpha-trypsininhibitorheavychainH2OS=HomosapiensGN=ITIH2PE=1SV=1;sp|P19823|ITIH2_HUMANInter-alpha-trypsininhibitorheavychainH2OS=HomosapiensGN=ITIH2PE=1SV=2;tr|Q5T987|Q5T987_HUMANInter-alpha-trypsininhibitorheavychainH2(Fragment)OS=HomosapiensGN=ITIH2PE=1SV=1;CON__Q9TRI1	tr|Q5T985|Q5T985_HUMANInter-alpha-trypsininhibitorheavychainH2OS=HomosapiensGN=ITIH2PE=1SV=1;sp|P19823|ITIH2_HUMANInter-alpha-trypsininhibitorheavychainH2OS=HomosapiensGN=ITIH2PE=1SV=2	15;15;5;3	15;15;5;3	15;15;5;3	;	4	15	15	15	5	2	3	3	0	7	1	0	6	1	2	2	12	3	0	8	7	0	0	0	0	5	2	3	3	0	7	1	0	6	1	2	2	12	3	0	8	7	0	0
sp|P19827|ITIH1_HUMANInter-alpha-trypsininhibitorheavychainH1OS=HomosapiensGN=ITIH1PE=1SV=3;tr|H7C0N0|H7C0N0_HUMANInter-alpha-trypsininhibitorheavychainH1(Fragment)OS=HomosapiensGN=ITIH1PE=1SV=1;CON__Q0VCM5;tr|F8WAS2|F8WAS2_HUMANInter-alpha-trypsininhibitorheavychainH1OS=HomosapiensGN=ITIH1PE=1SV=1;tr|H7C5I0|H7C5I0_HUMANInter-alpha-trypsininhibitorheavychainH1(Fragment)OS=HomosapiensGN=ITIH1PE=1S…	sp|P19827|ITIH1_HUMANInter-alpha-trypsininhibitorheavychainH1OS=HomosapiensGN=ITIH1PE=1SV=3	18;6;5;4;1	18;6;5;4;1	18;6;5;4;1		5	18	18	18	5	2	7	2	0	3	1	0	3	2	2	0	13	3	0	6	8	1	0	1	0	5	2	7	2	0	3	1	0	3	2	2	0	13	3	0	6	8	1	0
sp|P19878|NCF2_HUMANNeutrophilcytosolfactor2OS=HomosapiensGN=NCF2PE=1SV=2;tr|B1ALB7|B1ALB7_HUMANNeutrophilcytosolfactor2(Fragment)OS=HomosapiensGN=NCF2PE=1SV=1	sp|P19878|NCF2_HUMANNeutrophilcytosolfactor2OS=HomosapiensGN=NCF2PE=1SV=2	5;2	5;2	5;2		2	5	5	5	2	2	1	0	0	2	1	0	0	1	3	2	0	3	2	0	0	1	0	1	1	2	2	1	0	0	2	1	0	0	1	3	2	0	3	2	0	0	1	0
tr|C9JGI3|C9JGI3_HUMANThymidinephosphorylase(Fragment)OS=HomosapiensGN=TYMPPE=1SV=1;sp|P19971|TYPH_HUMANThymidinephosphorylaseOS=HomosapiensGN=TYMPPE=1SV=2;tr|A0A1W2PP80|A0A1W2PP80_HUMANProteinSCO2homolog,mitochondrial(Fragment)OS=HomosapiensGN=SCO2PE=4SV=1	tr|C9JGI3|C9JGI3_HUMANThymidinephosphorylase(Fragment)OS=HomosapiensGN=TYMPPE=1SV=1;sp|P19971|TYPH_HUMANThymidinephosphorylaseOS=HomosapiensGN=TYMPPE=1SV=2	11;11;3	11;11;3	11;11;3	;	3	11	11	11	5	4	7	7	0	8	10	0	8	7	2	5	0	4	1	6	1	1	1	0	0	5	4	7	7	0	8	10	0	8	7	2	5	0	4	1	6	1	1	1
tr|H0Y6F8|H0Y6F8_HUMANHLAclassIIhistocompatibilityantigen,DPalpha1chain(Fragment)OS=HomosapiensGN=HLA-DPA1PE=1SV=1;tr|A0A140T9G9|A0A140T9G9_HUMANHLAclassIIhistocompatibilityantigen,DPalpha1chain(Fragment)OS=HomosapiensGN=HLA-DPA1PE=1SV=1;tr|A0A140T9G7|A0A140T9G7_HUMANHLAclassIIhistocompatibilityantigen,DPalpha1chain(Fragment)OS=HomosapiensGN=HLA-DPA1PE=1SV=1;tr|A0A140T9A6|A0A140T9A6_HUMANHLAclass…	tr|H0Y6F8|H0Y6F8_HUMANHLAclassIIhistocompatibilityantigen,DPalpha1chain(Fragment)OS=HomosapiensGN=HLA-DPA1PE=1SV=1;tr|A0A140T9G9|A0A140T9G9_HUMANHLAclassIIhistocompatibilityantigen,DPalpha1chain(Fragment)OS=HomosapiensGN=HLA-DPA1PE=1SV=1;tr|A0A140T9G7|A0A140T9G7_HUMANHLAclassIIhistocompatibilityantigen,DPalpha1chain(Fragment)OS=HomosapiensGN=HLA-DPA1PE=1SV=1;tr|A0A140T9A6|A0A140T9A6_HUMANHLAclass…	1;1;1;1;1;1;1;1;1;1;1;1;1;1;1;1;1;1;1;1;1;1;1;1;1	1;1;1;1;1;1;1;1;1;1;1;1;1;1;1;1;1;1;1;1;1;1;1;1;1	1;1;1;1;1;1;1;1;1;1;1;1;1;1;1;1;1;1;1;1;1;1;1;1;1	;;;;;;;;;;;;;;;;;;;;;;;;	25	1	1	1	1	1	0	1	0	0	0	0	1	0	0	1	0	1	0	0	0	0	0	0	0	1	1	0	1	0	0	0	0	1	0	0	1	0	1	0	0	0	0	0
sp|P20039|2B1B_HUMANHLAclassIIhistocompatibilityantigen,DRB1-11betachainOS=HomosapiensGN=HLA-DRB1PE=1SV=1;tr|A0A182DWF4|A0A182DWF4_HUMANHLAclassIIhistocompatibilityantigen,DPbeta1chainOS=HomosapiensGN=HLA-DPB1PE=1SV=1;tr|A0A0G2JJV3|A0A0G2JJV3_HUMANHLAclassIIhistocompatibilityantigen,DPbeta1chainOS=HomosapiensGN=HLA-DPB1PE=1SV=1;tr|A0A182DWG2|A0A182DWG2_HUMANHLAclassIIhistocompatibilityantigen,DPb…	sp|P20039|2B1B_HUMANHLAclassIIhistocompatibilityantigen,DRB1-11betachainOS=HomosapiensGN=HLA-DRB1PE=1SV=1;tr|A0A182DWF4|A0A182DWF4_HUMANHLAclassIIhistocompatibilityantigen,DPbeta1chainOS=HomosapiensGN=HLA-DPB1PE=1SV=1;tr|A0A0G2JJV3|A0A0G2JJV3_HUMANHLAclassIIhistocompatibilityantigen,DPbeta1chainOS=HomosapiensGN=HLA-DPB1PE=1SV=1;tr|A0A182DWG2|A0A182DWG2_HUMANHLAclassIIhistocompatibilityantigen,DPb…	4;2;2;2;2;2;2;2;2;2;1;1;1;1;1;1;1;1;1;1;1	1;1;1;1;1;1;1;1;1;1;0;0;0;0;0;0;0;0;0;0;0	1;1;1;1;1;1;1;1;1;1;0;0;0;0;0;0;0;0;0;0;0	;;;;;;;;;	21	4	1	1	0	1	2	2	0	2	2	0	2	0	1	1	1	3	1	2	1	0	0	1	0	0	0	0	0	0	0	0	0	0	0	0	0	0	1	0	0	0	0	0
sp|P20073|ANXA7_HUMANAnnexinA7OS=HomosapiensGN=ANXA7PE=1SV=3	sp|P20073|ANXA7_HUMANAnnexinA7OS=HomosapiensGN=ANXA7PE=1SV=3	10	10	10		1	10	10	10	4	2	5	6	2	6	3	0	3	3	0	1	0	4	0	3	1	1	1	0	0	4	2	5	6	2	6	3	0	3	3	0	1	0	4	0	3	1	1	1
sp|P20142|PEPC_HUMANGastricsinOS=HomosapiensGN=PGCPE=1SV=1;tr|A2A3L9|A2A3L9_HUMANGastricsin(Fragment)OS=HomosapiensGN=PGCPE=1SV=1;tr|Q4VXA6|Q4VXA6_HUMANGastricsin(Fragment)OS=HomosapiensGN=PGCPE=1SV=8	sp|P20142|PEPC_HUMANGastricsinOS=HomosapiensGN=PGCPE=1SV=1;tr|A2A3L9|A2A3L9_HUMANGastricsin(Fragment)OS=HomosapiensGN=PGCPE=1SV=1;tr|Q4VXA6|Q4VXA6_HUMANGastricsin(Fragment)OS=HomosapiensGN=PGCPE=1SV=8	2;1;1	2;1;1	2;1;1	;;	3	2	2	2	1	1	1	1	0	1	0	0	1	0	0	0	0	0	0	1	0	0	0	0	0	1	1	1	1	0	1	0	0	1	0	0	0	0	0	0	1	0	0	0
sp|P20160|CAP7_HUMANAzurocidinOS=HomosapiensGN=AZU1PE=1SV=3;tr|A0A087WXP0|A0A087WXP0_HUMANAzurocidinOS=HomosapiensGN=AZU1PE=1SV=1	sp|P20160|CAP7_HUMANAzurocidinOS=HomosapiensGN=AZU1PE=1SV=3	12;4	12;4	12;4		2	12	12	12	3	2	2	1	0	2	0	0	0	0	3	2	0	3	1	7	5	6	8	9	1	3	2	2	1	0	2	0	0	0	0	3	2	0	3	1	7	5	6	8
sp|P20340|RAB6A_HUMANRas-relatedproteinRab-6AOS=HomosapiensGN=RAB6APE=1SV=3;tr|C9JB90|C9JB90_HUMANRas-relatedproteinRab-6B(Fragment)OS=HomosapiensGN=RAB6BPE=4SV=1;tr|F5H3K7|F5H3K7_HUMANRas-relatedproteinRab-6A(Fragment)OS=HomosapiensGN=RAB6APE=1SV=1;tr|C9JU14|C9JU14_HUMANRas-relatedproteinRab-6B(Fragment)OS=HomosapiensGN=RAB6BPE=1SV=3;tr|F5GX61|F5GX61_HUMANRas-relatedproteinRab-6AOS=HomosapiensGN…	sp|P20340|RAB6A_HUMANRas-relatedproteinRab-6AOS=HomosapiensGN=RAB6APE=1SV=3;tr|C9JB90|C9JB90_HUMANRas-relatedproteinRab-6B(Fragment)OS=HomosapiensGN=RAB6BPE=4SV=1;tr|F5H3K7|F5H3K7_HUMANRas-relatedproteinRab-6A(Fragment)OS=HomosapiensGN=RAB6APE=1SV=1;tr|C9JU14|C9JU14_HUMANRas-relatedproteinRab-6B(Fragment)OS=HomosapiensGN=RAB6BPE=1SV=3;tr|F5GX61|F5GX61_HUMANRas-relatedproteinRab-6AOS=HomosapiensGN…	2;1;1;1;1;1;1;1	2;1;1;1;1;1;1;1	2;1;1;1;1;1;1;1	;;;;;;;	8	2	2	2	1	0	1	1	0	1	1	0	1	0	1	1	0	1	1	0	0	0	0	0	0	1	0	1	1	0	1	1	0	1	0	1	1	0	1	1	0	0	0	0
tr|F8W8T1|F8W8T1_HUMANInterferon-inducedGTP-bindingproteinMx1OS=HomosapiensGN=MX1PE=1SV=1;sp|P20591|MX1_HUMANInterferon-inducedGTP-bindingproteinMx1OS=HomosapiensGN=MX1PE=1SV=4;tr|H9KVC7|H9KVC7_HUMANInterferon-inducedGTP-bindingproteinMx1(Fragment)OS=HomosapiensGN=MX1PE=1SV=1;tr|H9KVC9|H9KVC9_HUMANInterferon-inducedGTP-bindingproteinMx1(Fragment)OS=HomosapiensGN=MX1PE=1SV=1;tr|H9KVD0|H9KVD0_HUMAN…	tr|F8W8T1|F8W8T1_HUMANInterferon-inducedGTP-bindingproteinMx1OS=HomosapiensGN=MX1PE=1SV=1;sp|P20591|MX1_HUMANInterferon-inducedGTP-bindingproteinMx1OS=HomosapiensGN=MX1PE=1SV=4;tr|H9KVC7|H9KVC7_HUMANInterferon-inducedGTP-bindingproteinMx1(Fragment)OS=HomosapiensGN=MX1PE=1SV=1;tr|H9KVC9|H9KVC9_HUMANInterferon-inducedGTP-bindingproteinMx1(Fragment)OS=HomosapiensGN=MX1PE=1SV=1	5;5;3;3;1;1	5;5;3;3;1;1	5;5;3;3;1;1	;;;	6	5	5	5	1	0	1	1	0	2	2	0	3	0	1	0	0	2	0	0	0	0	0	0	0	1	0	1	1	0	2	2	0	3	0	1	0	0	2	0	0	0	0	0
sp|P20618|PSB1_HUMANProteasomesubunitbetatype-1OS=HomosapiensGN=PSMB1PE=1SV=2	sp|P20618|PSB1_HUMANProteasomesubunitbetatype-1OS=HomosapiensGN=PSMB1PE=1SV=2	2	2	2		1	2	2	2	1	0	2	2	0	1	0	0	1	0	0	0	0	0	0	1	0	0	0	0	0	1	0	2	2	0	1	0	0	1	0	0	0	0	0	0	1	0	0	0
sp|P20674|COX5A_HUMANCytochromecoxidasesubunit5A,mitochondrialOS=HomosapiensGN=COX5APE=1SV=2;tr|H3BNX8|H3BNX8_HUMANCytochromecoxidasesubunit5A,mitochondrialOS=HomosapiensGN=COX5APE=1SV=1;tr|H3BRM5|H3BRM5_HUMANCytochromecoxidasesubunit5A,mitochondrialOS=HomosapiensGN=COX5APE=1SV=1;tr|H3BV69|H3BV69_HUMANCytochromecoxidasesubunit5A,mitochondrialOS=HomosapiensGN=COX5APE=1SV=1	sp|P20674|COX5A_HUMANCytochromecoxidasesubunit5A,mitochondrialOS=HomosapiensGN=COX5APE=1SV=2;tr|H3BNX8|H3BNX8_HUMANCytochromecoxidasesubunit5A,mitochondrialOS=HomosapiensGN=COX5APE=1SV=1;tr|H3BRM5|H3BRM5_HUMANCytochromecoxidasesubunit5A,mitochondrialOS=HomosapiensGN=COX5APE=1SV=1;tr|H3BV69|H3BV69_HUMANCytochromecoxidasesubunit5A,mitochondrialOS=HomosapiensGN=COX5APE=1SV=1	2;2;1;1	2;2;1;1	2;2;1;1	;;;	4	2	2	2	1	0	0	0	0	0	0	0	0	0	0	0	1	1	0	0	0	0	0	0	0	1	0	0	0	0	0	0	0	0	0	0	0	1	1	0	0	0	0	0
sp|P20700|LMNB1_HUMANLamin-B1OS=HomosapiensGN=LMNB1PE=1SV=2;tr|A0A0D9SFE5|A0A0D9SFE5_HUMANLaminB1,isoformCRA_aOS=HomosapiensGN=LMNB1PE=1SV=1;tr|E9PBF6|E9PBF6_HUMANLamin-B1OS=HomosapiensGN=LMNB1PE=1SV=1;tr|A0A0D9SFY5|A0A0D9SFY5_HUMANLamin-B1(Fragment)OS=HomosapiensGN=LMNB1PE=1SV=1	sp|P20700|LMNB1_HUMANLamin-B1OS=HomosapiensGN=LMNB1PE=1SV=2;tr|A0A0D9SFE5|A0A0D9SFE5_HUMANLaminB1,isoformCRA_aOS=HomosapiensGN=LMNB1PE=1SV=1;tr|E9PBF6|E9PBF6_HUMANLamin-B1OS=HomosapiensGN=LMNB1PE=1SV=1	4;2;2;1	4;2;2;1	4;2;2;1	;;	4	4	4	4	1	1	0	0	0	1	0	0	0	0	2	1	1	4	0	0	0	0	0	0	0	1	1	0	0	0	1	0	0	0	0	2	1	1	4	0	0	0	0	0
sp|P20701|ITAL_HUMANIntegrinalpha-LOS=HomosapiensGN=ITGALPE=1SV=3	sp|P20701|ITAL_HUMANIntegrinalpha-LOS=HomosapiensGN=ITGALPE=1SV=3	2	2	2		1	2	2	2	2	2	0	2	0	0	0	0	1	0	0	0	0	0	0	0	0	0	0	0	0	2	2	0	2	0	0	0	0	1	0	0	0	0	0	0	0	0	0	0
sp|P20702|ITAX_HUMANIntegrinalpha-XOS=HomosapiensGN=ITGAXPE=1SV=3;tr|H3BN02|H3BN02_HUMANIntegrinalpha-XOS=HomosapiensGN=ITGAXPE=1SV=1	sp|P20702|ITAX_HUMANIntegrinalpha-XOS=HomosapiensGN=ITGAXPE=1SV=3;tr|H3BN02|H3BN02_HUMANIntegrinalpha-XOS=HomosapiensGN=ITGAXPE=1SV=1	3;3	2;2	2;2	;	2	3	2	2	2	2	3	3	2	3	0	0	3	0	0	0	0	1	0	0	0	0	0	0	0	2	1	2	2	1	2	0	0	2	0	0	0	0	1	0	0	0	0	0
sp|P20742|PZP_HUMANPregnancyzoneproteinOS=HomosapiensGN=PZPPE=1SV=4	sp|P20742|PZP_HUMANPregnancyzoneproteinOS=HomosapiensGN=PZPPE=1SV=4	15	8	8		1	15	8	8	6	5	4	6	1	5	2	0	6	0	3	3	15	4	2	4	5	2	1	1	0	0	1	0	1	0	0	0	0	1	0	0	0	8	0	0	0	1	0	0
sp|P20851|C4BPB_HUMANC4b-bindingproteinbetachainOS=HomosapiensGN=C4BPBPE=1SV=1;tr|Q5VVQ7|Q5VVQ7_HUMANC4b-bindingproteinbetachain(Fragment)OS=HomosapiensGN=C4BPBPE=1SV=1	sp|P20851|C4BPB_HUMANC4b-bindingproteinbetachainOS=HomosapiensGN=C4BPBPE=1SV=1	6;2	6;2	6;2		2	6	6	6	1	1	0	0	0	0	0	1	0	0	0	0	5	0	0	2	2	0	0	1	0	1	1	0	0	0	0	0	1	0	0	0	0	5	0	0	2	2	0	0
sp|P21281|VATB2_HUMANV-typeprotonATPasesubunitB,brainisoformOS=HomosapiensGN=ATP6V1B2PE=1SV=3;tr|H0YC04|H0YC04_HUMANV-typeprotonATPasesubunitB,brainisoform(Fragment)OS=HomosapiensGN=ATP6V1B2PE=1SV=1	sp|P21281|VATB2_HUMANV-typeprotonATPasesubunitB,brainisoformOS=HomosapiensGN=ATP6V1B2PE=1SV=3;tr|H0YC04|H0YC04_HUMANV-typeprotonATPasesubunitB,brainisoform(Fragment)OS=HomosapiensGN=ATP6V1B2PE=1SV=1	3;2	3;2	3;2	;	2	3	3	3	1	0	1	0	0	2	2	0	2	1	1	1	0	1	0	1	0	0	0	0	0	1	0	1	0	0	2	2	0	2	1	1	1	0	1	0	1	0	0	0
tr|Q5HY54|Q5HY54_HUMANFilamin-AOS=HomosapiensGN=FLNAPE=1SV=1;sp|P21333|FLNA_HUMANFilamin-AOS=HomosapiensGN=FLNAPE=1SV=4;tr|Q60FE5|Q60FE5_HUMANFilamin-AOS=HomosapiensGN=FLNAPE=1SV=1;tr|A0A087WWY3|A0A087WWY3_HUMANFilamin-AOS=HomosapiensGN=FLNAPE=1SV=1;tr|F8WE98|F8WE98_HUMANFilamin-A(Fragment)OS=HomosapiensGN=FLNAPE=1SV=2;sp|Q14315|FLNC_HUMANFilamin-COS=HomosapiensGN=FLNCPE=1SV=3;tr|H0Y5C6|H0Y5C6_HU…	tr|Q5HY54|Q5HY54_HUMANFilamin-AOS=HomosapiensGN=FLNAPE=1SV=1;sp|P21333|FLNA_HUMANFilamin-AOS=HomosapiensGN=FLNAPE=1SV=4;tr|Q60FE5|Q60FE5_HUMANFilamin-AOS=HomosapiensGN=FLNAPE=1SV=1;tr|A0A087WWY3|A0A087WWY3_HUMANFilamin-AOS=HomosapiensGN=FLNAPE=1SV=1	94;94;92;81;23;7;6;5;2	94;94;92;81;23;7;6;5;2	89;89;87;76;18;2;6;5;2	;;;	9	94	94	89	42	20	32	31	23	67	43	0	55	39	29	44	32	51	4	30	12	6	4	3	2	42	20	32	31	23	67	43	0	55	39	29	44	32	51	4	30	12	6	4
sp|P21399|ACOC_HUMANCytoplasmicaconitatehydrataseOS=HomosapiensGN=ACO1PE=1SV=3	sp|P21399|ACOC_HUMANCytoplasmicaconitatehydrataseOS=HomosapiensGN=ACO1PE=1SV=3	5	5	5		1	5	5	5	0	0	1	1	0	1	2	0	2	0	1	2	0	4	0	1	0	0	0	0	0	0	0	1	1	0	1	2	0	2	0	1	2	0	4	0	1	0	0	0
sp|P21589|5NTD_HUMAN5'-nucleotidaseOS=HomosapiensGN=NT5EPE=1SV=1;tr|Q96B60|Q96B60_HUMAN5'-nucleotidaseOS=HomosapiensGN=NT5EPE=1SV=1;tr|H0Y3X5|H0Y3X5_HUMAN5'-nucleotidase(Fragment)OS=HomosapiensGN=NT5EPE=1SV=1;tr|H0Y7R7|H0Y7R7_HUMAN5'-nucleotidase(Fragment)OS=HomosapiensGN=NT5EPE=1SV=1	sp|P21589|5NTD_HUMAN5'-nucleotidaseOS=HomosapiensGN=NT5EPE=1SV=1;tr|Q96B60|Q96B60_HUMAN5'-nucleotidaseOS=HomosapiensGN=NT5EPE=1SV=1	5;3;2;1	5;3;2;1	5;3;2;1	;	4	5	5	5	2	3	5	5	0	1	0	1	1	0	0	0	0	0	0	1	0	0	0	0	0	2	3	5	5	0	1	0	1	1	0	0	0	0	0	0	1	0	0	0
sp|P21695|GPDA_HUMANGlycerol-3-phosphatedehydrogenase[NAD(+)],cytoplasmicOS=HomosapiensGN=GPD1PE=1SV=4	sp|P21695|GPDA_HUMANGlycerol-3-phosphatedehydrogenase[NAD(+)],cytoplasmicOS=HomosapiensGN=GPD1PE=1SV=4	10	10	10		1	10	10	10	5	3	3	2	1	5	4	0	6	3	2	4	3	6	1	0	0	1	1	0	0	5	3	3	2	1	5	4	0	6	3	2	4	3	6	1	0	0	1	1
sp|P21796|VDAC1_HUMANVoltage-dependentanion-selectivechannelprotein1OS=HomosapiensGN=VDAC1PE=1SV=2	sp|P21796|VDAC1_HUMANVoltage-dependentanion-selectivechannelprotein1OS=HomosapiensGN=VDAC1PE=1SV=2	2	2	2		1	2	2	2	1	1	1	0	0	2	2	0	1	2	0	0	0	2	0	0	0	0	0	0	0	1	1	1	0	0	2	2	0	1	2	0	0	0	2	0	0	0	0	0
tr|A6NNI4|A6NNI4_HUMANTetraspaninOS=HomosapiensGN=CD9PE=1SV=1;tr|G8JLH6|G8JLH6_HUMANTetraspanin(Fragment)OS=HomosapiensGN=CD9PE=1SV=1;sp|P21926|CD9_HUMANCD9antigenOS=HomosapiensGN=CD9PE=1SV=4;tr|A0A087WU13|A0A087WU13_HUMANTetraspaninOS=HomosapiensGN=CD9PE=1SV=1	tr|A6NNI4|A6NNI4_HUMANTetraspaninOS=HomosapiensGN=CD9PE=1SV=1;tr|G8JLH6|G8JLH6_HUMANTetraspanin(Fragment)OS=HomosapiensGN=CD9PE=1SV=1;sp|P21926|CD9_HUMANCD9antigenOS=HomosapiensGN=CD9PE=1SV=4	5;5;5;1	5;5;5;1	5;5;5;1	;;	4	5	5	5	2	3	3	3	1	1	1	0	1	1	2	2	2	2	0	4	2	0	1	1	0	2	3	3	3	1	1	1	0	1	1	2	2	2	2	0	4	2	0	1
tr|F8WBW9|F8WBW9_HUMANCatecholO-methyltransferaseOS=HomosapiensGN=COMTPE=1SV=1;tr|E7EMS6|E7EMS6_HUMANCatecholO-methyltransferase(Fragment)OS=HomosapiensGN=COMTPE=1SV=1;tr|E7EUU8|E7EUU8_HUMANCatecholO-methyltransferaseOS=HomosapiensGN=COMTPE=1SV=1;sp|P21964|COMT_HUMANCatecholO-methyltransferaseOS=HomosapiensGN=COMTPE=1SV=2	tr|F8WBW9|F8WBW9_HUMANCatecholO-methyltransferaseOS=HomosapiensGN=COMTPE=1SV=1;tr|E7EMS6|E7EMS6_HUMANCatecholO-methyltransferase(Fragment)OS=HomosapiensGN=COMTPE=1SV=1;tr|E7EUU8|E7EUU8_HUMANCatecholO-methyltransferaseOS=HomosapiensGN=COMTPE=1SV=1;sp|P21964|COMT_HUMANCatecholO-methyltransferaseOS=HomosapiensGN=COMTPE=1SV=2	2;2;2;2	2;2;2;2	2;2;2;2	;;;	4	2	2	2	1	0	1	1	0	1	1	0	1	1	1	1	0	1	0	0	0	0	0	0	0	1	0	1	1	0	1	1	0	1	1	1	1	0	1	0	0	0	0	0
sp|P21980|TGM2_HUMANProtein-glutaminegamma-glutamyltransferase2OS=HomosapiensGN=TGM2PE=1SV=2;tr|A2A299|A2A299_HUMANProtein-glutaminegamma-glutamyltransferase2(Fragment)OS=HomosapiensGN=TGM2PE=1SV=8;tr|A2A2A0|A2A2A0_HUMANProtein-glutaminegamma-glutamyltransferase2(Fragment)OS=HomosapiensGN=TGM2PE=1SV=8	sp|P21980|TGM2_HUMANProtein-glutaminegamma-glutamyltransferase2OS=HomosapiensGN=TGM2PE=1SV=2	24;7;5	24;7;5	24;7;5		3	24	24	24	15	7	14	13	2	15	8	1	13	10	10	11	8	11	4	3	3	2	1	5	1	15	7	14	13	2	15	8	1	13	10	10	11	8	11	4	3	3	2	1
tr|C9JZG2|C9JZG2_HUMANTrifunctionalpurinebiosyntheticproteinadenosine-3(Fragment)OS=HomosapiensGN=GARTPE=1SV=1;tr|C9JKQ7|C9JKQ7_HUMANTrifunctionalpurinebiosyntheticproteinadenosine-3(Fragment)OS=HomosapiensGN=GARTPE=1SV=1;tr|C9JBJ1|C9JBJ1_HUMANTrifunctionalpurinebiosyntheticproteinadenosine-3(Fragment)OS=HomosapiensGN=GARTPE=1SV=8;tr|C9JTV6|C9JTV6_HUMANTrifunctionalpurinebiosyntheticproteinadenos…	tr|C9JZG2|C9JZG2_HUMANTrifunctionalpurinebiosyntheticproteinadenosine-3(Fragment)OS=HomosapiensGN=GARTPE=1SV=1;tr|C9JKQ7|C9JKQ7_HUMANTrifunctionalpurinebiosyntheticproteinadenosine-3(Fragment)OS=HomosapiensGN=GARTPE=1SV=1;tr|C9JBJ1|C9JBJ1_HUMANTrifunctionalpurinebiosyntheticproteinadenosine-3(Fragment)OS=HomosapiensGN=GARTPE=1SV=8;tr|C9JTV6|C9JTV6_HUMANTrifunctionalpurinebiosyntheticproteinadenos…	1;1;1;1;1;1	1;1;1;1;1;1	1;1;1;1;1;1	;;;;;	6	1	1	1	1	0	0	0	0	0	0	0	0	0	0	1	0	1	0	0	0	0	0	0	0	1	0	0	0	0	0	0	0	0	0	0	1	0	1	0	0	0	0	0
sp|P22314|UBA1_HUMANUbiquitin-likemodifier-activatingenzyme1OS=HomosapiensGN=UBA1PE=1SV=3;tr|Q5JRR6|Q5JRR6_HUMANUbiquitin-likemodifier-activatingenzyme1OS=HomosapiensGN=UBA1PE=1SV=1;tr|Q5JRR9|Q5JRR9_HUMANUbiquitin-likemodifier-activatingenzyme1(Fragment)OS=HomosapiensGN=UBA1PE=1SV=8;tr|Q5JRS0|Q5JRS0_HUMANUbiquitin-likemodifier-activatingenzyme1(Fragment)OS=HomosapiensGN=UBA1PE=1SV=1;tr|Q5JRS2|Q5J…	sp|P22314|UBA1_HUMANUbiquitin-likemodifier-activatingenzyme1OS=HomosapiensGN=UBA1PE=1SV=3	16;5;4;4;3;2;2	16;5;4;4;3;2;2	16;5;4;4;3;2;2		7	16	16	16	7	6	5	5	0	12	9	0	12	2	1	6	1	6	0	5	3	0	0	0	0	7	6	5	5	0	12	9	0	12	2	1	6	1	6	0	5	3	0	0
tr|A0A087X1J7|A0A087X1J7_HUMANGlutathioneperoxidaseOS=HomosapiensGN=GPX3PE=1SV=1;sp|P22352|GPX3_HUMANGlutathioneperoxidase3OS=HomosapiensGN=GPX3PE=1SV=2;tr|H0YBE4|H0YBE4_HUMANGlutathioneperoxidase3(Fragment)OS=HomosapiensGN=GPX3PE=1SV=1	tr|A0A087X1J7|A0A087X1J7_HUMANGlutathioneperoxidaseOS=HomosapiensGN=GPX3PE=1SV=1;sp|P22352|GPX3_HUMANGlutathioneperoxidase3OS=HomosapiensGN=GPX3PE=1SV=2	3;3;1	3;3;1	3;3;1	;	3	3	3	3	0	0	0	0	0	0	0	0	0	0	0	0	3	0	0	0	0	0	0	0	0	0	0	0	0	0	0	0	0	0	0	0	0	3	0	0	0	0	0	0
tr|H3BRG4|H3BRG4_HUMANCytochromeb-c1complexsubunit2,mitochondrialOS=HomosapiensGN=UQCRC2PE=1SV=1;sp|P22695|QCR2_HUMANCytochromeb-c1complexsubunit2,mitochondrialOS=HomosapiensGN=UQCRC2PE=1SV=3;tr|H3BSJ9|H3BSJ9_HUMANCytochromeb-c1complexsubunit2,mitochondrialOS=HomosapiensGN=UQCRC2PE=1SV=1	tr|H3BRG4|H3BRG4_HUMANCytochromeb-c1complexsubunit2,mitochondrialOS=HomosapiensGN=UQCRC2PE=1SV=1;sp|P22695|QCR2_HUMANCytochromeb-c1complexsubunit2,mitochondrialOS=HomosapiensGN=UQCRC2PE=1SV=3;tr|H3BSJ9|H3BSJ9_HUMANCytochromeb-c1complexsubunit2,mitochondrialOS=HomosapiensGN=UQCRC2PE=1SV=1	2;2;1	2;2;1	2;2;1	;;	3	2	2	2	1	0	1	1	0	0	0	0	0	0	1	1	0	2	1	0	0	0	0	0	0	1	0	1	1	0	0	0	0	0	0	1	1	0	2	1	0	0	0	0
sp|P22792|CPN2_HUMANCarboxypeptidaseNsubunit2OS=HomosapiensGN=CPN2PE=1SV=3	sp|P22792|CPN2_HUMANCarboxypeptidaseNsubunit2OS=HomosapiensGN=CPN2PE=1SV=3	3	3	3		1	3	3	3	0	0	0	0	0	0	0	0	0	0	0	0	3	0	0	1	1	0	0	0	0	0	0	0	0	0	0	0	0	0	0	0	0	3	0	0	1	1	0	0
tr|H7C1M3|H7C1M3_HUMANMatrixmetalloproteinase(Fragment)OS=HomosapiensGN=MMP8PE=1SV=1;sp|P22894|MMP8_HUMANNeutrophilcollagenaseOS=HomosapiensGN=MMP8PE=1SV=1	tr|H7C1M3|H7C1M3_HUMANMatrixmetalloproteinase(Fragment)OS=HomosapiensGN=MMP8PE=1SV=1;sp|P22894|MMP8_HUMANNeutrophilcollagenaseOS=HomosapiensGN=MMP8PE=1SV=1	1;1	1;1	1;1	;	2	1	1	1	1	1	0	0	0	0	0	0	0	0	1	0	0	0	1	0	0	0	0	0	0	1	1	0	0	0	0	0	0	0	0	1	0	0	0	1	0	0	0	0
sp|P22897|MRC1_HUMANMacrophagemannosereceptor1OS=HomosapiensGN=MRC1PE=1SV=1	sp|P22897|MRC1_HUMANMacrophagemannosereceptor1OS=HomosapiensGN=MRC1PE=1SV=1	11	11	11		1	11	11	11	7	2	6	6	0	1	1	0	4	4	2	6	0	9	0	0	0	0	0	0	0	7	2	6	6	0	1	1	0	4	4	2	6	0	9	0	0	0	0	0
sp|P23083|HV102_HUMANImmunoglobulinheavyvariable1-2OS=HomosapiensGN=IGHV1-2PE=1SV=2	sp|P23083|HV102_HUMANImmunoglobulinheavyvariable1-2OS=HomosapiensGN=IGHV1-2PE=1SV=2	1	1	1		1	1	1	1	1	0	0	0	0	1	1	0	1	0	0	0	0	0	0	0	0	0	0	0	0	1	0	0	0	0	1	1	0	1	0	0	0	0	0	0	0	0	0	0
sp|P23141|EST1_HUMANLivercarboxylesterase1OS=HomosapiensGN=CES1PE=1SV=2;tr|H3BSU0|H3BSU0_HUMANLivercarboxylesterase1(Fragment)OS=HomosapiensGN=CES1PE=1SV=2;tr|H3BQV8|H3BQV8_HUMANLivercarboxylesterase1(Fragment)OS=HomosapiensGN=CES1PE=1SV=2;tr|A0A140TA63|A0A140TA63_HUMANLivercarboxylesterase1(Fragment)OS=HomosapiensGN=CES1PE=1SV=1	sp|P23141|EST1_HUMANLivercarboxylesterase1OS=HomosapiensGN=CES1PE=1SV=2;tr|H3BSU0|H3BSU0_HUMANLivercarboxylesterase1(Fragment)OS=HomosapiensGN=CES1PE=1SV=2	6;3;2;2	6;3;2;2	6;3;2;2	;	4	6	6	6	0	1	1	0	0	1	1	0	0	0	0	0	0	5	0	0	1	0	0	0	0	0	1	1	0	0	1	1	0	0	0	0	0	0	5	0	0	1	0	0
sp|P23142|FBLN1_HUMANFibulin-1OS=HomosapiensGN=FBLN1PE=1SV=4	sp|P23142|FBLN1_HUMANFibulin-1OS=HomosapiensGN=FBLN1PE=1SV=4	2	1	1		1	2	1	1	0	0	0	0	0	0	0	0	0	0	0	0	1	0	0	2	2	1	0	0	0	0	0	0	0	0	0	0	0	0	0	0	0	0	0	0	1	1	0	0
sp|P23284|PPIB_HUMANPeptidyl-prolylcis-transisomeraseBOS=HomosapiensGN=PPIBPE=1SV=2	sp|P23284|PPIB_HUMANPeptidyl-prolylcis-transisomeraseBOS=HomosapiensGN=PPIBPE=1SV=2	2	2	2		1	2	2	2	2	0	1	0	0	1	0	0	0	1	1	1	1	1	0	0	0	1	1	1	0	2	0	1	0	0	1	0	0	0	1	1	1	1	1	0	0	0	1	1
sp|P23381|SYWC_HUMANTryptophan--tRNAligase,cytoplasmicOS=HomosapiensGN=WARSPE=1SV=2;tr|G3V3H8|G3V3H8_HUMANTryptophan--tRNAligase,cytoplasmic(Fragment)OS=HomosapiensGN=WARSPE=1SV=8;tr|G3V3Y5|G3V3Y5_HUMANTryptophan--tRNAligase,cytoplasmic(Fragment)OS=HomosapiensGN=WARSPE=1SV=8;tr|G3V277|G3V277_HUMANTryptophan--tRNAligase,cytoplasmic(Fragment)OS=HomosapiensGN=WARSPE=1SV=1;tr|G3V3P2|G3V3P2_HUMANTrypt…	sp|P23381|SYWC_HUMANTryptophan--tRNAligase,cytoplasmicOS=HomosapiensGN=WARSPE=1SV=2;tr|G3V3H8|G3V3H8_HUMANTryptophan--tRNAligase,cytoplasmic(Fragment)OS=HomosapiensGN=WARSPE=1SV=8;tr|G3V3Y5|G3V3Y5_HUMANTryptophan--tRNAligase,cytoplasmic(Fragment)OS=HomosapiensGN=WARSPE=1SV=8;tr|G3V277|G3V277_HUMANTryptophan--tRNAligase,cytoplasmic(Fragment)OS=HomosapiensGN=WARSPE=1SV=1	18;10;10;9;8;8;7;7;7;6;5;5;3;3;2;2;2;2;2;2;2;2	18;10;10;9;8;8;7;7;7;6;5;5;3;3;2;2;2;2;2;2;2;2	18;10;10;9;8;8;7;7;7;6;5;5;3;3;2;2;2;2;2;2;2;2	;;;	22	18	18	18	12	3	3	3	0	14	8	0	14	4	2	5	2	10	1	9	3	0	0	0	0	12	3	3	3	0	14	8	0	14	4	2	5	2	10	1	9	3	0	0
sp|P23396|RS3_HUMAN40SribosomalproteinS3OS=HomosapiensGN=RPS3PE=1SV=2;tr|E9PL09|E9PL09_HUMAN40SribosomalproteinS3OS=HomosapiensGN=RPS3PE=1SV=1;tr|E9PPU1|E9PPU1_HUMAN40SribosomalproteinS3OS=HomosapiensGN=RPS3PE=1SV=1;tr|F2Z2S8|F2Z2S8_HUMAN40SribosomalproteinS3OS=HomosapiensGN=RPS3PE=1SV=1;tr|H0YF32|H0YF32_HUMAN40SribosomalproteinS3(Fragment)OS=HomosapiensGN=RPS3PE=1SV=1;tr|H0YCJ7|H0YCJ7_HUMAN40Sri…	sp|P23396|RS3_HUMAN40SribosomalproteinS3OS=HomosapiensGN=RPS3PE=1SV=2;tr|E9PL09|E9PL09_HUMAN40SribosomalproteinS3OS=HomosapiensGN=RPS3PE=1SV=1;tr|E9PPU1|E9PPU1_HUMAN40SribosomalproteinS3OS=HomosapiensGN=RPS3PE=1SV=1;tr|F2Z2S8|F2Z2S8_HUMAN40SribosomalproteinS3OS=HomosapiensGN=RPS3PE=1SV=1;tr|H0YF32|H0YF32_HUMAN40SribosomalproteinS3(Fragment)OS=HomosapiensGN=RPS3PE=1SV=1;tr|H0YCJ7|H0YCJ7_HUMAN40Sri…	9;8;7;6;6;6;6;4;4;4;2;1;1	9;8;7;6;6;6;6;4;4;4;2;1;1	9;8;7;6;6;6;6;4;4;4;2;1;1	;;;;;;	13	9	9	9	6	1	2	4	1	6	1	0	8	4	3	2	1	6	1	1	0	1	0	0	0	6	1	2	4	1	6	1	0	8	4	3	2	1	6	1	1	0	1	0
sp|P23526|SAHH_HUMANAdenosylhomocysteinaseOS=HomosapiensGN=AHCYPE=1SV=4	sp|P23526|SAHH_HUMANAdenosylhomocysteinaseOS=HomosapiensGN=AHCYPE=1SV=4	2	2	2		1	2	2	2	1	0	0	0	0	1	0	0	2	0	1	2	0	2	0	0	0	0	0	0	1	1	0	0	0	0	1	0	0	2	0	1	2	0	2	0	0	0	0	0
sp|Q16778|H2B2E_HUMANHistoneH2Btype2-EOS=HomosapiensGN=HIST2H2BEPE=1SV=3;sp|P33778|H2B1B_HUMANHistoneH2Btype1-BOS=HomosapiensGN=HIST1H2BBPE=1SV=2;sp|P23527|H2B1O_HUMANHistoneH2Btype1-OOS=HomosapiensGN=HIST1H2BOPE=1SV=3;sp|Q8N257|H2B3B_HUMANHistoneH2Btype3-BOS=HomosapiensGN=HIST3H2BBPE=1SV=3;sp|Q96A08|H2B1A_HUMANHistoneH2Btype1-AOS=HomosapiensGN=HIST1H2BAPE=1SV=3	sp|Q16778|H2B2E_HUMANHistoneH2Btype2-EOS=HomosapiensGN=HIST2H2BEPE=1SV=3;sp|P33778|H2B1B_HUMANHistoneH2Btype1-BOS=HomosapiensGN=HIST1H2BBPE=1SV=2;sp|P23527|H2B1O_HUMANHistoneH2Btype1-OOS=HomosapiensGN=HIST1H2BOPE=1SV=3;sp|Q8N257|H2B3B_HUMANHistoneH2Btype3-BOS=HomosapiensGN=HIST3H2BBPE=1SV=3;sp|Q96A08|H2B1A_HUMANHistoneH2Btype1-AOS=HomosapiensGN=HIST1H2BAPE=1SV=3	15;15;15;11;9	1;1;1;1;0	0;0;0;0;0	;;;;	5	15	1	0	5	5	8	8	4	10	6	3	7	6	4	4	5	4	4	10	7	13	10	13	1	0	0	0	0	0	1	1	0	0	1	0	0	0	0	0	0	0	0	0
sp|P23528|COF1_HUMANCofilin-1OS=HomosapiensGN=CFL1PE=1SV=3;tr|E9PP50|E9PP50_HUMANCofilin-1(Fragment)OS=HomosapiensGN=CFL1PE=1SV=8;tr|G3V1A4|G3V1A4_HUMANCofilin1(Non-muscle),isoformCRA_aOS=HomosapiensGN=CFL1PE=1SV=1;tr|E9PK25|E9PK25_HUMANCofilin-1OS=HomosapiensGN=CFL1PE=1SV=1;tr|E9PQB7|E9PQB7_HUMANCofilin-1(Fragment)OS=HomosapiensGN=CFL1PE=1SV=1;tr|E9PS23|E9PS23_HUMANCofilin-1(Fragment)OS=Homosapi…	sp|P23528|COF1_HUMANCofilin-1OS=HomosapiensGN=CFL1PE=1SV=3;tr|E9PP50|E9PP50_HUMANCofilin-1(Fragment)OS=HomosapiensGN=CFL1PE=1SV=8;tr|G3V1A4|G3V1A4_HUMANCofilin1(Non-muscle),isoformCRA_aOS=HomosapiensGN=CFL1PE=1SV=1;tr|E9PK25|E9PK25_HUMANCofilin-1OS=HomosapiensGN=CFL1PE=1SV=1;tr|E9PQB7|E9PQB7_HUMANCofilin-1(Fragment)OS=HomosapiensGN=CFL1PE=1SV=1	13;12;10;10;7;5;5;3	13;12;10;10;7;5;5;3	11;10;8;8;5;5;3;3	;;;;	8	13	13	11	5	1	3	4	2	13	9	2	7	6	2	2	2	4	0	4	3	1	0	1	0	5	1	3	4	2	13	9	2	7	6	2	2	2	4	0	4	3	1	0
tr|U3KPS2|U3KPS2_HUMANMyeloblastinOS=HomosapiensGN=PRTN3PE=1SV=1;sp|P24158|PRTN3_HUMANMyeloblastinOS=HomosapiensGN=PRTN3PE=1SV=3	tr|U3KPS2|U3KPS2_HUMANMyeloblastinOS=HomosapiensGN=PRTN3PE=1SV=1;sp|P24158|PRTN3_HUMANMyeloblastinOS=HomosapiensGN=PRTN3PE=1SV=3	2;2	2;2	2;2	;	2	2	2	2	0	0	0	1	1	1	0	0	1	0	0	0	0	0	0	0	0	0	0	1	1	0	0	0	1	1	1	0	0	1	0	0	0	0	0	0	0	0	0	0
tr|A0A0A0MSK3|A0A0A0MSK3_HUMANHCG14925,isoformCRA_bOS=HomosapiensGN=TBXAS1PE=1SV=1;sp|P24557|THAS_HUMANThromboxane-AsynthaseOS=HomosapiensGN=TBXAS1PE=1SV=3;tr|Q53F23|Q53F23_HUMANHCG14925,isoformCRA_a(Fragment)OS=HomosapiensGN=TBXAS1PE=1SV=1;tr|A0A0C4DH47|A0A0C4DH47_HUMANThromboxane-AsynthaseOS=HomosapiensGN=TBXAS1PE=1SV=1	tr|A0A0A0MSK3|A0A0A0MSK3_HUMANHCG14925,isoformCRA_bOS=HomosapiensGN=TBXAS1PE=1SV=1;sp|P24557|THAS_HUMANThromboxane-AsynthaseOS=HomosapiensGN=TBXAS1PE=1SV=3;tr|Q53F23|Q53F23_HUMANHCG14925,isoformCRA_a(Fragment)OS=HomosapiensGN=TBXAS1PE=1SV=1;tr|A0A0C4DH47|A0A0C4DH47_HUMANThromboxane-AsynthaseOS=HomosapiensGN=TBXAS1PE=1SV=1	1;1;1;1	1;1;1;1	1;1;1;1	;;;	4	1	1	1	0	0	0	0	0	0	0	0	0	0	0	0	0	1	0	0	0	0	0	1	0	0	0	0	0	0	0	0	0	0	0	0	0	0	1	0	0	0	0	0
tr|F5H7V9|F5H7V9_HUMANTenascinOS=HomosapiensGN=TNCPE=1SV=1;tr|E9PC84|E9PC84_HUMANTenascinOS=HomosapiensGN=TNCPE=1SV=1;tr|J3QSU6|J3QSU6_HUMANTenascinOS=HomosapiensGN=TNCPE=1SV=1;sp|P24821|TENA_HUMANTenascinOS=HomosapiensGN=TNCPE=1SV=3	tr|F5H7V9|F5H7V9_HUMANTenascinOS=HomosapiensGN=TNCPE=1SV=1;tr|E9PC84|E9PC84_HUMANTenascinOS=HomosapiensGN=TNCPE=1SV=1;tr|J3QSU6|J3QSU6_HUMANTenascinOS=HomosapiensGN=TNCPE=1SV=1;sp|P24821|TENA_HUMANTenascinOS=HomosapiensGN=TNCPE=1SV=3	1;1;1;1	1;1;1;1	1;1;1;1	;;;	4	1	1	1	1	1	1	1	0	1	0	0	0	0	0	0	0	0	0	0	0	1	0	0	0	1	1	1	1	0	1	0	0	0	0	0	0	0	0	0	0	0	1	0
tr|C9JEV0|C9JEV0_HUMANZinc-alpha-2-glycoproteinOS=HomosapiensGN=AZGP1PE=1SV=1;sp|P25311|ZA2G_HUMANZinc-alpha-2-glycoproteinOS=HomosapiensGN=AZGP1PE=1SV=2;tr|H7BZJ8|H7BZJ8_HUMANZinc-alpha-2-glycoprotein(Fragment)OS=HomosapiensGN=AZGP1PE=1SV=1	tr|C9JEV0|C9JEV0_HUMANZinc-alpha-2-glycoproteinOS=HomosapiensGN=AZGP1PE=1SV=1;sp|P25311|ZA2G_HUMANZinc-alpha-2-glycoproteinOS=HomosapiensGN=AZGP1PE=1SV=2	3;3;1	3;3;1	3;3;1	;	3	3	3	3	0	0	0	0	0	0	0	0	0	0	0	0	0	0	0	2	3	0	0	0	0	0	0	0	0	0	0	0	0	0	0	0	0	0	0	0	2	3	0	0
sp|P25705|ATPA_HUMANATPsynthasesubunitalpha,mitochondrialOS=HomosapiensGN=ATP5A1PE=1SV=1;tr|K7EQH4|K7EQH4_HUMANATPsynthasesubunitalpha,mitochondrial(Fragment)OS=HomosapiensGN=ATP5A1PE=1SV=1;tr|K7EJP1|K7EJP1_HUMANATPsynthasesubunitalpha,mitochondrial(Fragment)OS=HomosapiensGN=ATP5A1PE=1SV=8;tr|K7ENJ4|K7ENJ4_HUMANATPsynthasesubunitalpha,mitochondrial(Fragment)OS=HomosapiensGN=ATP5A1PE=1SV=1;tr|K7ER…	sp|P25705|ATPA_HUMANATPsynthasesubunitalpha,mitochondrialOS=HomosapiensGN=ATP5A1PE=1SV=1	3;1;1;1;1;1	3;1;1;1;1;1	3;1;1;1;1;1		6	3	3	3	2	1	1	1	0	2	3	1	2	2	1	1	0	1	0	0	1	0	0	0	0	2	1	1	1	0	2	3	1	2	2	1	1	0	1	0	0	1	0	0
sp|P25786|PSA1_HUMANProteasomesubunitalphatype-1OS=HomosapiensGN=PSMA1PE=1SV=1;tr|F5GX11|F5GX11_HUMANProteasomeendopeptidasecomplexOS=HomosapiensGN=PSMA1PE=1SV=1;tr|B4DEV8|B4DEV8_HUMANProteasomesubunitalphatypeOS=HomosapiensPE=2SV=1	sp|P25786|PSA1_HUMANProteasomesubunitalphatype-1OS=HomosapiensGN=PSMA1PE=1SV=1;tr|F5GX11|F5GX11_HUMANProteasomeendopeptidasecomplexOS=HomosapiensGN=PSMA1PE=1SV=1;tr|B4DEV8|B4DEV8_HUMANProteasomesubunitalphatypeOS=HomosapiensPE=2SV=1	8;6;5	8;6;5	8;6;5	;;	3	8	8	8	2	1	2	2	0	3	3	0	1	1	0	0	0	0	1	5	4	0	1	4	0	2	1	2	2	0	3	3	0	1	1	0	0	0	0	1	5	4	0	1
tr|A0A024RA52|A0A024RA52_HUMANProteasomesubunitalphatypeOS=HomosapiensGN=PSMA2PE=1SV=1;sp|P25787|PSA2_HUMANProteasomesubunitalphatype-2OS=HomosapiensGN=PSMA2PE=1SV=2;tr|H3BT36|H3BT36_HUMANUncharacterizedproteinOS=HomosapiensPE=1SV=1;tr|H7C402|H7C402_HUMANProteasomesubunitalphatype-2(Fragment)OS=HomosapiensGN=PSMA2PE=1SV=1;tr|C9JCK5|C9JCK5_HUMANProteasomeendopeptidasecomplexOS=HomosapiensGN=PSMA2P…	tr|A0A024RA52|A0A024RA52_HUMANProteasomesubunitalphatypeOS=HomosapiensGN=PSMA2PE=1SV=1;sp|P25787|PSA2_HUMANProteasomesubunitalphatype-2OS=HomosapiensGN=PSMA2PE=1SV=2	5;5;2;1;1	5;5;2;1;1	5;5;2;1;1	;	5	5	5	5	2	2	3	2	0	4	1	0	4	2	0	0	0	0	0	2	1	0	0	0	0	2	2	3	2	0	4	1	0	4	2	0	0	0	0	0	2	1	0	0
tr|G3V4X5|G3V4X5_HUMANProteasomeendopeptidasecomplexOS=HomosapiensGN=PSMA3PE=1SV=1;sp|P25788|PSA3_HUMANProteasomesubunitalphatype-3OS=HomosapiensGN=PSMA3PE=1SV=2;tr|H0YJ03|H0YJ03_HUMANProteasomesubunitalphatype-3(Fragment)OS=HomosapiensGN=PSMA3PE=1SV=1	tr|G3V4X5|G3V4X5_HUMANProteasomeendopeptidasecomplexOS=HomosapiensGN=PSMA3PE=1SV=1;sp|P25788|PSA3_HUMANProteasomesubunitalphatype-3OS=HomosapiensGN=PSMA3PE=1SV=2	4;4;1	4;4;1	4;4;1	;	3	4	4	4	2	1	3	2	0	3	1	0	3	0	0	0	0	0	0	3	0	1	1	0	0	2	1	3	2	0	3	1	0	3	0	0	0	0	0	0	3	0	1	1
tr|H0YMZ1|H0YMZ1_HUMANProteasomesubunitalphatype(Fragment)OS=HomosapiensGN=PSMA4PE=1SV=8;tr|H0YL69|H0YL69_HUMANProteasomesubunitalphatype(Fragment)OS=HomosapiensGN=PSMA4PE=1SV=1;sp|P25789|PSA4_HUMANProteasomesubunitalphatype-4OS=HomosapiensGN=PSMA4PE=1SV=1;tr|H0YLS6|H0YLS6_HUMANProteasomesubunitalphatypeOS=HomosapiensGN=PSMA4PE=1SV=1;tr|H0YLC2|H0YLC2_HUMANProteasomesubunitalphatypeOS=HomosapiensG…	tr|H0YMZ1|H0YMZ1_HUMANProteasomesubunitalphatype(Fragment)OS=HomosapiensGN=PSMA4PE=1SV=8;tr|H0YL69|H0YL69_HUMANProteasomesubunitalphatype(Fragment)OS=HomosapiensGN=PSMA4PE=1SV=1;sp|P25789|PSA4_HUMANProteasomesubunitalphatype-4OS=HomosapiensGN=PSMA4PE=1SV=1;tr|H0YLS6|H0YLS6_HUMANProteasomesubunitalphatypeOS=HomosapiensGN=PSMA4PE=1SV=1;tr|H0YLC2|H0YLC2_HUMANProteasomesubunitalphatypeOS=HomosapiensG…	3;3;3;2;2;2;2;2;1	3;3;3;2;2;2;2;2;1	3;3;3;2;2;2;2;2;1	;;;;;;;	9	3	3	3	1	0	2	1	0	2	0	0	3	0	0	0	1	2	0	2	0	1	1	1	1	1	0	2	1	0	2	0	0	3	0	0	0	1	2	0	2	0	1	1
sp|P25815|S100P_HUMANProteinS100-POS=HomosapiensGN=S100PPE=1SV=2	sp|P25815|S100P_HUMANProteinS100-POS=HomosapiensGN=S100PPE=1SV=2	5	5	5		1	5	5	5	3	4	4	4	2	0	0	0	1	0	2	1	1	2	2	0	0	0	0	3	2	3	4	4	4	2	0	0	0	1	0	2	1	1	2	2	0	0	0	0
sp|P26038|MOES_HUMANMoesinOS=HomosapiensGN=MSNPE=1SV=3	sp|P26038|MOES_HUMANMoesinOS=HomosapiensGN=MSNPE=1SV=3	26	18	16		1	26	18	16	11	8	18	18	1	13	9	0	11	4	4	7	5	10	1	10	7	3	2	5	3	6	3	12	13	1	7	7	0	6	2	3	2	1	5	1	8	7	2	0
tr|J3QSB4|J3QSB4_HUMAN60SribosomalproteinL13(Fragment)OS=HomosapiensGN=RPL13PE=1SV=1;sp|P26373|RL13_HUMAN60SribosomalproteinL13OS=HomosapiensGN=RPL13PE=1SV=4	tr|J3QSB4|J3QSB4_HUMAN60SribosomalproteinL13(Fragment)OS=HomosapiensGN=RPL13PE=1SV=1;sp|P26373|RL13_HUMAN60SribosomalproteinL13OS=HomosapiensGN=RPL13PE=1SV=4	2;2	2;2	2;2	;	2	2	2	2	2	2	1	2	0	1	0	0	0	1	0	0	0	0	0	0	0	0	1	0	0	2	2	1	2	0	1	0	0	0	1	0	0	0	0	0	0	0	0	1
sp|P26447|S10A4_HUMANProteinS100-A4OS=HomosapiensGN=S100A4PE=1SV=1	sp|P26447|S10A4_HUMANProteinS100-A4OS=HomosapiensGN=S100A4PE=1SV=1	6	6	6		1	6	6	6	6	6	5	4	1	5	2	0	4	2	0	1	0	1	0	0	0	0	0	0	0	6	6	5	4	1	5	2	0	4	2	0	1	0	1	0	0	0	0	0
tr|D6R9A6|D6R9A6_HUMANHighmobilitygroupproteinB2(Fragment)OS=HomosapiensGN=HMGB2PE=1SV=1;sp|P26583|HMGB2_HUMANHighmobilitygroupproteinB2OS=HomosapiensGN=HMGB2PE=1SV=2	tr|D6R9A6|D6R9A6_HUMANHighmobilitygroupproteinB2(Fragment)OS=HomosapiensGN=HMGB2PE=1SV=1;sp|P26583|HMGB2_HUMANHighmobilitygroupproteinB2OS=HomosapiensGN=HMGB2PE=1SV=2	1;1	1;1	1;1	;	2	1	1	1	0	0	0	0	0	0	0	0	0	0	1	1	0	1	1	0	0	0	0	1	0	0	0	0	0	0	0	0	0	0	0	1	1	0	1	1	0	0	0	0
sp|P26640|SYVC_HUMANValine--tRNAligaseOS=HomosapiensGN=VARSPE=1SV=4;tr|A2ABF4|A2ABF4_HUMANValine--tRNAligase(Fragment)OS=HomosapiensGN=VARSPE=1SV=1;tr|A0A0G2JJT9|A0A0G2JJT9_HUMANValine--tRNAligase(Fragment)OS=HomosapiensGN=VARSPE=1SV=1;tr|A0A140T954|A0A140T954_HUMANValine--tRNAligase(Fragment)OS=HomosapiensGN=VARSPE=1SV=1;tr|A0A140T936|A0A140T936_HUMANValine--tRNAligase(Fragment)OS=HomosapiensGN=…	sp|P26640|SYVC_HUMANValine--tRNAligaseOS=HomosapiensGN=VARSPE=1SV=4;tr|A2ABF4|A2ABF4_HUMANValine--tRNAligase(Fragment)OS=HomosapiensGN=VARSPE=1SV=1;tr|A0A0G2JJT9|A0A0G2JJT9_HUMANValine--tRNAligase(Fragment)OS=HomosapiensGN=VARSPE=1SV=1;tr|A0A140T954|A0A140T954_HUMANValine--tRNAligase(Fragment)OS=HomosapiensGN=VARSPE=1SV=1	3;2;2;2;1	3;2;2;2;1	3;2;2;2;1	;;;	5	3	3	3	1	1	0	0	0	3	1	0	2	0	1	1	0	1	1	0	0	0	0	0	0	1	1	0	0	0	3	1	0	2	0	1	1	0	1	1	0	0	0	0
sp|P26641|EF1G_HUMANElongationfactor1-gammaOS=HomosapiensGN=EEF1GPE=1SV=3	sp|P26641|EF1G_HUMANElongationfactor1-gammaOS=HomosapiensGN=EEF1GPE=1SV=3	7	7	7		1	7	7	7	2	3	3	2	0	6	3	0	7	4	0	2	0	2	0	1	1	0	0	0	0	2	3	3	2	0	6	3	0	7	4	0	2	0	2	0	1	1	0	0
sp|P27105|STOM_HUMANErythrocyteband7integralmembraneproteinOS=HomosapiensGN=STOMPE=1SV=3;tr|F8VSL7|F8VSL7_HUMANErythrocyteband7integralmembraneproteinOS=HomosapiensGN=STOMPE=1SV=1	sp|P27105|STOM_HUMANErythrocyteband7integralmembraneproteinOS=HomosapiensGN=STOMPE=1SV=3	15;3	15;3	15;3		2	15	15	15	6	1	6	9	2	9	5	0	9	3	7	6	3	6	1	10	3	3	5	6	1	6	1	6	9	2	9	5	0	9	3	7	6	3	6	1	10	3	3	5
sp|P27169|PON1_HUMANSerumparaoxonase/arylesterase1OS=HomosapiensGN=PON1PE=1SV=3;tr|F8WF42|F8WF42_HUMANSerumparaoxonase/arylesterase1OS=HomosapiensGN=PON1PE=1SV=1	sp|P27169|PON1_HUMANSerumparaoxonase/arylesterase1OS=HomosapiensGN=PON1PE=1SV=3	4;1	4;1	4;1		2	4	4	4	1	0	0	0	0	2	1	1	1	0	1	0	3	2	0	0	0	1	0	0	0	1	0	0	0	0	2	1	1	1	0	1	0	3	2	0	0	0	1	0
sp|P27348|1433T_HUMAN14-3-3proteinthetaOS=HomosapiensGN=YWHAQPE=1SV=1;tr|E9PG15|E9PG15_HUMAN14-3-3proteintheta(Fragment)OS=HomosapiensGN=YWHAQPE=1SV=1	sp|P27348|1433T_HUMAN14-3-3proteinthetaOS=HomosapiensGN=YWHAQPE=1SV=1;tr|E9PG15|E9PG15_HUMAN14-3-3proteintheta(Fragment)OS=HomosapiensGN=YWHAQPE=1SV=1	8;6	6;6	6;6	;	2	8	6	6	4	4	3	4	1	3	3	0	3	1	1	4	1	4	0	1	0	0	0	0	1	3	3	2	3	1	1	2	0	1	0	0	3	0	3	0	1	0	0	0
tr|F8W7C6|F8W7C6_HUMAN60SribosomalproteinL10OS=HomosapiensGN=RPL10PE=1SV=2;tr|A0A087WV22|A0A087WV22_HUMAN60SribosomalproteinL10OS=HomosapiensGN=RPL10PE=1SV=1;tr|X1WI28|X1WI28_HUMAN60SribosomalproteinL10(Fragment)OS=HomosapiensGN=RPL10PE=1SV=7;sp|P27635|RL10_HUMAN60SribosomalproteinL10OS=HomosapiensGN=RPL10PE=1SV=4;tr|H7C123|H7C123_HUMAN60SribosomalproteinL10(Fragment)OS=HomosapiensGN=RPL10PE=1SV=…	tr|F8W7C6|F8W7C6_HUMAN60SribosomalproteinL10OS=HomosapiensGN=RPL10PE=1SV=2;tr|A0A087WV22|A0A087WV22_HUMAN60SribosomalproteinL10OS=HomosapiensGN=RPL10PE=1SV=1;tr|X1WI28|X1WI28_HUMAN60SribosomalproteinL10(Fragment)OS=HomosapiensGN=RPL10PE=1SV=7;sp|P27635|RL10_HUMAN60SribosomalproteinL10OS=HomosapiensGN=RPL10PE=1SV=4;tr|H7C123|H7C123_HUMAN60SribosomalproteinL10(Fragment)OS=HomosapiensGN=RPL10PE=1SV=…	5;5;5;5;4;4	5;5;5;5;4;4	3;3;3;3;2;2	;;;;;	6	5	5	3	0	1	0	0	0	2	0	0	2	0	2	0	2	2	0	0	0	1	0	0	0	0	1	0	0	0	2	0	0	2	0	2	0	2	2	0	0	0	1	0
sp|P27797|CALR_HUMANCalreticulinOS=HomosapiensGN=CALRPE=1SV=1;tr|K7EJB9|K7EJB9_HUMANCalreticulin(Fragment)OS=HomosapiensGN=CALRPE=1SV=1;tr|K7EL50|K7EL50_HUMANCalreticulin(Fragment)OS=HomosapiensGN=CALRPE=1SV=1	sp|P27797|CALR_HUMANCalreticulinOS=HomosapiensGN=CALRPE=1SV=1;tr|K7EJB9|K7EJB9_HUMANCalreticulin(Fragment)OS=HomosapiensGN=CALRPE=1SV=1	6;4;2	6;4;2	6;4;2	;	3	6	6	6	3	2	2	2	0	0	0	0	1	0	5	6	3	6	4	0	0	0	0	0	2	3	2	2	2	0	0	0	0	1	0	5	6	3	6	4	0	0	0	0
sp|P27824|CALX_HUMANCalnexinOS=HomosapiensGN=CANXPE=1SV=2;tr|H0Y9Q7|H0Y9Q7_HUMANCalnexin(Fragment)OS=HomosapiensGN=CANXPE=1SV=1;tr|D6RAU8|D6RAU8_HUMANCalnexin(Fragment)OS=HomosapiensGN=CANXPE=1SV=1;tr|D6RB85|D6RB85_HUMANCalnexin(Fragment)OS=HomosapiensGN=CANXPE=1SV=1;tr|D6RDP7|D6RDP7_HUMANCalnexin(Fragment)OS=HomosapiensGN=CANXPE=1SV=1;tr|D6RGY2|D6RGY2_HUMANCalnexin(Fragment)OS=HomosapiensGN=CANX…	sp|P27824|CALX_HUMANCalnexinOS=HomosapiensGN=CANXPE=1SV=2	12;4;3;3;3;2;1;1;1	12;4;3;3;3;2;1;1;1	12;4;3;3;3;2;1;1;1		9	12	12	12	4	0	1	1	1	2	3	0	3	0	6	6	2	8	3	0	0	0	0	2	3	4	0	1	1	1	2	3	0	3	0	6	6	2	8	3	0	0	0	0
tr|E9PAQ1|E9PAQ1_HUMANProperdinOS=HomosapiensGN=CFPPE=1SV=1;sp|P27918|PROP_HUMANProperdinOS=HomosapiensGN=CFPPE=1SV=2;tr|C9J7V5|C9J7V5_HUMANProperdin(Fragment)OS=HomosapiensGN=CFPPE=1SV=1	tr|E9PAQ1|E9PAQ1_HUMANProperdinOS=HomosapiensGN=CFPPE=1SV=1;sp|P27918|PROP_HUMANProperdinOS=HomosapiensGN=CFPPE=1SV=2;tr|C9J7V5|C9J7V5_HUMANProperdin(Fragment)OS=HomosapiensGN=CFPPE=1SV=1	3;3;2	3;3;2	3;3;2	;;	3	3	3	3	0	0	0	0	0	0	0	0	0	0	1	0	3	0	0	0	0	0	0	0	0	0	0	0	0	0	0	0	0	0	0	1	0	3	0	0	0	0	0	0
tr|X5D2R7|X5D2R7_HUMANProteasomesubunitbetatypeOS=HomosapiensGN=PSM8PE=1SV=1;sp|P28062|PSB8_HUMANProteasomesubunitbetatype-8OS=HomosapiensGN=PSMB8PE=1SV=3;tr|Q5JNW7|Q5JNW7_HUMANProteasomesubunitbetatype-8OS=HomosapiensGN=PSMB8PE=1SV=1;tr|A0A140T998|A0A140T998_HUMANProteasomesubunitbetatype-8OS=HomosapiensGN=PSMB8PE=1SV=1	tr|X5D2R7|X5D2R7_HUMANProteasomesubunitbetatypeOS=HomosapiensGN=PSM8PE=1SV=1;sp|P28062|PSB8_HUMANProteasomesubunitbetatype-8OS=HomosapiensGN=PSMB8PE=1SV=3;tr|Q5JNW7|Q5JNW7_HUMANProteasomesubunitbetatype-8OS=HomosapiensGN=PSMB8PE=1SV=1;tr|A0A140T998|A0A140T998_HUMANProteasomesubunitbetatype-8OS=HomosapiensGN=PSMB8PE=1SV=1	5;5;4;4	5;5;4;4	5;5;4;4	;;;	4	5	5	5	2	3	3	2	1	3	3	0	3	1	1	0	0	1	0	3	2	0	0	1	0	2	3	3	2	1	3	3	0	3	1	1	0	0	1	0	3	2	0	0
tr|A2ACR0|A2ACR0_HUMANProteasomesubunitbetatype-9(Fragment)OS=HomosapiensGN=PSMB9PE=1SV=1;tr|A0A0G2JJQ0|A0A0G2JJQ0_HUMANProteasomesubunitbetatype-9(Fragment)OS=HomosapiensGN=PSMB9PE=1SV=1;tr|A0A0G2JJ13|A0A0G2JJ13_HUMANProteasomesubunitbetatype-9OS=HomosapiensGN=PSMB9PE=1SV=1;tr|A0A0G2JHI2|A0A0G2JHI2_HUMANProteasomesubunitbetatype-9OS=HomosapiensGN=PSMB9PE=1SV=1;tr|A2ACR1|A2ACR1_HUMANProteasomesub…	tr|A2ACR0|A2ACR0_HUMANProteasomesubunitbetatype-9(Fragment)OS=HomosapiensGN=PSMB9PE=1SV=1;tr|A0A0G2JJQ0|A0A0G2JJQ0_HUMANProteasomesubunitbetatype-9(Fragment)OS=HomosapiensGN=PSMB9PE=1SV=1;tr|A0A0G2JJ13|A0A0G2JJ13_HUMANProteasomesubunitbetatype-9OS=HomosapiensGN=PSMB9PE=1SV=1;tr|A0A0G2JHI2|A0A0G2JHI2_HUMANProteasomesubunitbetatype-9OS=HomosapiensGN=PSMB9PE=1SV=1;tr|A2ACR1|A2ACR1_HUMANProteasomesub…	1;1;1;1;1;1;1	1;1;1;1;1;1;1	1;1;1;1;1;1;1	;;;;;;	7	1	1	1	1	1	1	1	1	1	0	0	1	0	0	0	0	0	0	0	0	0	0	0	0	1	1	1	1	1	1	0	0	1	0	0	0	0	0	0	0	0	0	0
sp|P28066|PSA5_HUMANProteasomesubunitalphatype-5OS=HomosapiensGN=PSMA5PE=1SV=3	sp|P28066|PSA5_HUMANProteasomesubunitalphatype-5OS=HomosapiensGN=PSMA5PE=1SV=3	5	5	5		1	5	5	5	2	3	1	1	1	2	1	0	2	1	3	3	1	4	1	4	0	3	1	3	1	2	3	1	1	1	2	1	0	2	1	3	3	1	4	1	4	0	3	1
tr|F6UB75|F6UB75_HUMANUncharacterizedprotein(Fragment)OS=HomosapiensPE=4SV=1;tr|A0A140T9U6|A0A140T9U6_HUMANHLAclassIIhistocompatibilityantigen,DMbetachain(Fragment)OS=HomosapiensGN=HLA-DMBPE=4SV=1;tr|A0A140T9T8|A0A140T9T8_HUMANHLAclassIIhistocompatibilityantigen,DMbetachain(Fragment)OS=HomosapiensGN=HLA-DMBPE=4SV=1;tr|A0A140T9R2|A0A140T9R2_HUMANHLAclassIIhistocompatibilityantigen,DMbetachain(Frag…	tr|F6UB75|F6UB75_HUMANUncharacterizedprotein(Fragment)OS=HomosapiensPE=4SV=1;tr|A0A140T9U6|A0A140T9U6_HUMANHLAclassIIhistocompatibilityantigen,DMbetachain(Fragment)OS=HomosapiensGN=HLA-DMBPE=4SV=1;tr|A0A140T9T8|A0A140T9T8_HUMANHLAclassIIhistocompatibilityantigen,DMbetachain(Fragment)OS=HomosapiensGN=HLA-DMBPE=4SV=1;tr|A0A140T9R2|A0A140T9R2_HUMANHLAclassIIhistocompatibilityantigen,DMbetachain(Frag…	1;1;1;1;1;1;1;1;1;1;1	1;1;1;1;1;1;1;1;1;1;1	1;1;1;1;1;1;1;1;1;1;1	;;;;;;;;;;	11	1	1	1	1	1	1	1	0	0	0	0	1	0	0	1	0	1	0	0	0	0	0	0	0	1	1	1	1	0	0	0	0	1	0	0	1	0	1	0	0	0	0	0
sp|P28070|PSB4_HUMANProteasomesubunitbetatype-4OS=HomosapiensGN=PSMB4PE=1SV=4	sp|P28070|PSB4_HUMANProteasomesubunitbetatype-4OS=HomosapiensGN=PSMB4PE=1SV=4	6	6	6		1	6	6	6	3	2	4	3	0	3	0	0	3	1	1	1	0	1	0	1	1	0	0	2	0	3	2	4	3	0	3	0	0	3	1	1	1	0	1	0	1	1	0	0
sp|P28072|PSB6_HUMANProteasomesubunitbetatype-6OS=HomosapiensGN=PSMB6PE=1SV=4;tr|I3L3X7|I3L3X7_HUMANProteasomesubunitbetatype-6(Fragment)OS=HomosapiensGN=PSMB6PE=1SV=1;tr|A0A087X2I4|A0A087X2I4_HUMANProteasomesubunitbetatypeOS=HomosapiensGN=PSMB6PE=1SV=1	sp|P28072|PSB6_HUMANProteasomesubunitbetatype-6OS=HomosapiensGN=PSMB6PE=1SV=4;tr|I3L3X7|I3L3X7_HUMANProteasomesubunitbetatype-6(Fragment)OS=HomosapiensGN=PSMB6PE=1SV=1;tr|A0A087X2I4|A0A087X2I4_HUMANProteasomesubunitbetatypeOS=HomosapiensGN=PSMB6PE=1SV=1	2;1;1	2;1;1	2;1;1	;;	3	2	2	2	0	1	1	1	0	0	0	0	0	0	0	0	0	0	0	1	0	0	0	0	1	0	1	1	1	0	0	0	0	0	0	0	0	0	0	0	1	0	0	0
sp|P28482|MK01_HUMANMitogen-activatedproteinkinase1OS=HomosapiensGN=MAPK1PE=1SV=3;tr|H0YDH9|H0YDH9_HUMANMitogen-activatedproteinkinase3(Fragment)OS=HomosapiensGN=MAPK3PE=1SV=2;tr|K7ELV1|K7ELV1_HUMANMitogen-activatedproteinkinase4OS=HomosapiensGN=MAPK4PE=1SV=1;tr|B3KR49|B3KR49_HUMANMitogen-activatedproteinkinase3OS=HomosapiensGN=MAPK3PE=1SV=1;tr|K7EN18|K7EN18_HUMANMitogen-activatedproteinkinase4OS…	sp|P28482|MK01_HUMANMitogen-activatedproteinkinase1OS=HomosapiensGN=MAPK1PE=1SV=3	4;1;1;1;1;1;1;1;1;1;1	4;1;1;1;1;1;1;1;1;1;1	4;1;1;1;1;1;1;1;1;1;1		11	4	4	4	0	0	0	0	0	4	0	0	2	0	1	0	0	2	0	0	0	0	0	1	1	0	0	0	0	0	4	0	0	2	0	1	0	0	2	0	0	0	0	0
tr|H7C2Z6|H7C2Z6_HUMANGrancalcin(Fragment)OS=HomosapiensGN=GCAPE=1SV=1;tr|H7BXD5|H7BXD5_HUMANGrancalcinOS=HomosapiensGN=GCAPE=1SV=1;sp|P28676|GRAN_HUMANGrancalcinOS=HomosapiensGN=GCAPE=1SV=2;tr|C9JIZ3|C9JIZ3_HUMANGrancalcin(Fragment)OS=HomosapiensGN=GCAPE=1SV=1	tr|H7C2Z6|H7C2Z6_HUMANGrancalcin(Fragment)OS=HomosapiensGN=GCAPE=1SV=1;tr|H7BXD5|H7BXD5_HUMANGrancalcinOS=HomosapiensGN=GCAPE=1SV=1;sp|P28676|GRAN_HUMANGrancalcinOS=HomosapiensGN=GCAPE=1SV=2	5;5;5;2	5;5;5;2	5;5;5;2	;;	4	5	5	5	1	1	3	4	0	3	2	0	5	0	1	2	0	1	0	0	0	0	0	0	0	1	1	3	4	0	3	2	0	5	0	1	2	0	1	0	0	0	0	0
sp|P28838|AMPL_HUMANCytosolaminopeptidaseOS=HomosapiensGN=LAP3PE=1SV=3;tr|H0Y9Q1|H0Y9Q1_HUMANCytosolaminopeptidase(Fragment)OS=HomosapiensGN=LAP3PE=1SV=8	sp|P28838|AMPL_HUMANCytosolaminopeptidaseOS=HomosapiensGN=LAP3PE=1SV=3;tr|H0Y9Q1|H0Y9Q1_HUMANCytosolaminopeptidase(Fragment)OS=HomosapiensGN=LAP3PE=1SV=8	12;7	12;7	12;7	;	2	12	12	12	4	0	1	3	1	8	8	0	6	2	0	2	2	4	1	3	2	0	0	0	0	4	0	1	3	1	8	8	0	6	2	0	2	2	4	1	3	2	0	0
sp|P29350|PTN6_HUMANTyrosine-proteinphosphatasenon-receptortype6OS=HomosapiensGN=PTPN6PE=1SV=1;tr|F5H0N8|F5H0N8_HUMANTyrosine-proteinphosphatase(Fragment)OS=HomosapiensGN=PTPN6PE=1SV=1;tr|F5H5H9|F5H5H9_HUMANTyrosine-proteinphosphatase(Fragment)OS=HomosapiensGN=PTPN6PE=1SV=1;tr|F5GY79|F5GY79_HUMANTyrosine-proteinphosphatase(Fragment)OS=HomosapiensGN=PTPN6PE=1SV=1;tr|F5H1Z8|F5H1Z8_HUMANTyrosine-pro…	sp|P29350|PTN6_HUMANTyrosine-proteinphosphatasenon-receptortype6OS=HomosapiensGN=PTPN6PE=1SV=1	11;4;3;3;3;1;1;1;1	11;4;3;3;3;1;1;1;1	11;4;3;3;3;1;1;1;1		9	11	11	11	8	6	6	4	2	6	5	0	6	2	3	8	0	8	1	1	0	0	0	0	1	8	6	6	4	2	6	5	0	6	2	3	8	0	8	1	1	0	0	0
sp|P29401|TKT_HUMANTransketolaseOS=HomosapiensGN=TKTPE=1SV=3;tr|A0A0B4J1R6|A0A0B4J1R6_HUMANTransketolaseOS=HomosapiensGN=TKTPE=1SV=1;tr|E9PFF2|E9PFF2_HUMANTransketolaseOS=HomosapiensGN=TKTPE=1SV=1;tr|F8W888|F8W888_HUMANTransketolaseOS=HomosapiensGN=TKTPE=1SV=1;tr|F8WAX4|F8WAX4_HUMANTransketolaseOS=HomosapiensGN=TKTPE=1SV=1	sp|P29401|TKT_HUMANTransketolaseOS=HomosapiensGN=TKTPE=1SV=3;tr|A0A0B4J1R6|A0A0B4J1R6_HUMANTransketolaseOS=HomosapiensGN=TKTPE=1SV=1;tr|E9PFF2|E9PFF2_HUMANTransketolaseOS=HomosapiensGN=TKTPE=1SV=1	21;16;12;5;2	21;16;12;5;2	21;16;12;5;2	;;	5	21	21	21	10	8	11	12	8	16	13	2	15	7	6	9	2	10	5	5	1	2	4	9	2	10	8	11	12	8	16	13	2	15	7	6	9	2	10	5	5	1	2	4
sp|P29508|SPB3_HUMANSerpinB3OS=HomosapiensGN=SERPINB3PE=1SV=2;sp|P48594|SPB4_HUMANSerpinB4OS=HomosapiensGN=SERPINB4PE=1SV=2;tr|C9JZ65|C9JZ65_HUMANSerpinB4(Fragment)OS=HomosapiensGN=SERPINB4PE=1SV=1;tr|H0Y5H9|H0Y5H9_HUMANSerpinB4(Fragment)OS=HomosapiensGN=SERPINB4PE=1SV=1	sp|P29508|SPB3_HUMANSerpinB3OS=HomosapiensGN=SERPINB3PE=1SV=2;sp|P48594|SPB4_HUMANSerpinB4OS=HomosapiensGN=SERPINB4PE=1SV=2	12;6;4;4	12;6;4;4	12;6;4;4	;	4	12	12	12	6	9	10	10	1	6	3	0	5	2	1	2	2	4	1	3	1	1	0	1	0	6	9	10	10	1	6	3	0	5	2	1	2	2	4	1	3	1	1	0
sp|P29966|MARCS_HUMANMyristoylatedalanine-richC-kinasesubstrateOS=HomosapiensGN=MARCKSPE=1SV=4	sp|P29966|MARCS_HUMANMyristoylatedalanine-richC-kinasesubstrateOS=HomosapiensGN=MARCKSPE=1SV=4	1	1	1		1	1	1	1	0	0	0	0	0	0	0	0	0	0	1	1	0	1	0	0	0	0	0	0	0	0	0	0	0	0	0	0	0	0	0	1	1	0	1	0	0	0	0	0
sp|P29972|AQP1_HUMANAquaporin-1OS=HomosapiensGN=AQP1PE=1SV=3;tr|K7N7A8|K7N7A8_HUMANUncharacterizedprotein(Fragment)OS=HomosapiensPE=3SV=2	sp|P29972|AQP1_HUMANAquaporin-1OS=HomosapiensGN=AQP1PE=1SV=3;tr|K7N7A8|K7N7A8_HUMANUncharacterizedprotein(Fragment)OS=HomosapiensPE=3SV=2	2;2	2;2	2;2	;	2	2	2	2	0	0	0	0	0	0	0	0	0	0	0	0	0	0	0	2	0	0	0	0	0	0	0	0	0	0	0	0	0	0	0	0	0	0	0	0	2	0	0	0
sp|P29992|GNA11_HUMANGuaninenucleotide-bindingproteinsubunitalpha-11OS=HomosapiensGN=GNA11PE=1SV=2;tr|A0A087WVZ3|A0A087WVZ3_HUMANGuaninenucleotide-bindingproteinsubunitalpha-11(Fragment)OS=HomosapiensGN=GNA11PE=1SV=1;tr|K7EL62|K7EL62_HUMANGuaninenucleotide-bindingproteinsubunitalpha-11(Fragment)OS=HomosapiensGN=GNA11PE=1SV=1	sp|P29992|GNA11_HUMANGuaninenucleotide-bindingproteinsubunitalpha-11OS=HomosapiensGN=GNA11PE=1SV=2	4;1;1	4;1;1	2;1;1		3	4	4	2	1	2	3	3	0	2	2	0	1	1	1	1	1	2	0	0	1	2	1	1	0	1	2	3	3	0	2	2	0	1	1	1	1	1	2	0	0	1	2	1
sp|P30041|PRDX6_HUMANPeroxiredoxin-6OS=HomosapiensGN=PRDX6PE=1SV=3	sp|P30041|PRDX6_HUMANPeroxiredoxin-6OS=HomosapiensGN=PRDX6PE=1SV=3	14	14	14		1	14	14	14	8	4	4	5	1	6	9	0	9	4	3	3	0	4	1	2	1	1	1	2	0	8	4	4	5	1	6	9	0	9	4	3	3	0	4	1	2	1	1	1
sp|P30043|BLVRB_HUMANFlavinreductase(NADPH)OS=HomosapiensGN=BLVRBPE=1SV=3;tr|M0R192|M0R192_HUMANFlavinreductase(NADPH)OS=HomosapiensGN=BLVRBPE=1SV=1;tr|M0QZL1|M0QZL1_HUMANFlavinreductase(NADPH)OS=HomosapiensGN=BLVRBPE=1SV=1	sp|P30043|BLVRB_HUMANFlavinreductase(NADPH)OS=HomosapiensGN=BLVRBPE=1SV=3;tr|M0R192|M0R192_HUMANFlavinreductase(NADPH)OS=HomosapiensGN=BLVRBPE=1SV=1	6;5;2	6;5;2	6;5;2	;	3	6	6	6	1	1	1	1	0	2	3	0	2	0	1	1	0	3	0	0	0	0	0	0	0	1	1	1	1	0	2	3	0	2	0	1	1	0	3	0	0	0	0	0
sp|P30044|PRDX5_HUMANPeroxiredoxin-5,mitochondrialOS=HomosapiensGN=PRDX5PE=1SV=4	sp|P30044|PRDX5_HUMANPeroxiredoxin-5,mitochondrialOS=HomosapiensGN=PRDX5PE=1SV=4	6	6	6		1	6	6	6	4	2	3	4	0	3	2	0	2	2	3	3	1	3	0	3	2	0	0	1	0	4	2	3	4	0	3	2	0	2	2	3	3	1	3	0	3	2	0	0
sp|P30048|PRDX3_HUMANThioredoxin-dependentperoxidereductase,mitochondrialOS=HomosapiensGN=PRDX3PE=1SV=3	sp|P30048|PRDX3_HUMANThioredoxin-dependentperoxidereductase,mitochondrialOS=HomosapiensGN=PRDX3PE=1SV=3	3	3	3		1	3	3	3	1	1	1	1	0	0	0	0	1	0	1	2	1	2	0	2	0	0	0	0	0	1	1	1	1	0	0	0	0	1	0	1	2	1	2	0	2	0	0	0
sp|P30050|RL12_HUMAN60SribosomalproteinL12OS=HomosapiensGN=RPL12PE=1SV=1	sp|P30050|RL12_HUMAN60SribosomalproteinL12OS=HomosapiensGN=RPL12PE=1SV=1	1	1	1		1	1	1	1	0	1	0	0	0	1	0	0	1	1	0	1	1	1	0	0	0	0	0	0	0	0	1	0	0	0	1	0	0	1	1	0	1	1	1	0	0	0	0	0
sp|P30085|KCY_HUMANUMP-CMPkinaseOS=HomosapiensGN=CMPK1PE=1SV=3;tr|Q5T0D2|Q5T0D2_HUMANUMP-CMPkinaseOS=HomosapiensGN=CMPK1PE=1SV=1	sp|P30085|KCY_HUMANUMP-CMPkinaseOS=HomosapiensGN=CMPK1PE=1SV=3;tr|Q5T0D2|Q5T0D2_HUMANUMP-CMPkinaseOS=HomosapiensGN=CMPK1PE=1SV=1	5;4	5;4	5;4	;	2	5	5	5	1	1	1	0	0	1	1	0	2	1	0	3	0	2	0	3	0	1	1	0	0	1	1	1	0	0	1	1	0	2	1	0	3	0	2	0	3	0	1	1
sp|P30101|PDIA3_HUMANProteindisulfide-isomeraseA3OS=HomosapiensGN=PDIA3PE=1SV=4	sp|P30101|PDIA3_HUMANProteindisulfide-isomeraseA3OS=HomosapiensGN=PDIA3PE=1SV=4	9	9	9		1	9	9	9	3	2	2	4	0	6	4	0	4	3	3	6	2	6	2	0	1	0	0	0	2	3	2	2	4	0	6	4	0	4	3	3	6	2	6	2	0	1	0	0
sp|P30153|2AAA_HUMANSerine/threonine-proteinphosphatase2A65kDaregulatorysubunitAalphaisoformOS=HomosapiensGN=PPP2R1APE=1SV=4;tr|C9J9C1|C9J9C1_HUMANSerine/threonine-proteinphosphatase2A65kDaregulatorysubunitAalphaisoform(Fragment)OS=HomosapiensGN=PPP2R1APE=1SV=2;tr|B3KQV6|B3KQV6_HUMANSerine/threonine-proteinphosphatase2A65kDaregulatorysubunitAalphaisoformOS=HomosapiensGN=PPP2R1APE=1SV=1;tr|E9PH38|…	sp|P30153|2AAA_HUMANSerine/threonine-proteinphosphatase2A65kDaregulatorysubunitAalphaisoformOS=HomosapiensGN=PPP2R1APE=1SV=4;tr|C9J9C1|C9J9C1_HUMANSerine/threonine-proteinphosphatase2A65kDaregulatorysubunitAalphaisoform(Fragment)OS=HomosapiensGN=PPP2R1APE=1SV=2;tr|B3KQV6|B3KQV6_HUMANSerine/threonine-proteinphosphatase2A65kDaregulatorysubunitAalphaisoformOS=HomosapiensGN=PPP2R1APE=1SV=1	9;6;5;3;2;1;1;1	9;6;5;3;2;1;1;1	9;6;5;3;2;1;1;1	;;	8	9	9	9	4	4	3	3	1	7	4	0	5	1	3	3	3	3	1	1	2	1	0	1	0	4	4	3	3	1	7	4	0	5	1	3	3	3	3	1	1	2	1	0
sp|P30273|FCERG_HUMANHighaffinityimmunoglobulinepsilonreceptorsubunitgammaOS=HomosapiensGN=FCER1GPE=1SV=1	sp|P30273|FCERG_HUMANHighaffinityimmunoglobulinepsilonreceptorsubunitgammaOS=HomosapiensGN=FCER1GPE=1SV=1	1	1	1		1	1	1	1	1	0	0	0	0	0	0	0	1	0	1	1	1	1	0	0	0	0	0	1	0	1	0	0	0	0	0	0	0	1	0	1	1	1	1	0	0	0	0	0
sp|P30480|1B42_HUMANHLAclassIhistocompatibilityantigen,B-42alphachainOS=HomosapiensGN=HLA-BPE=1SV=1;sp|P30460|1B08_HUMANHLAclassIhistocompatibilityantigen,B-8alphachainOS=HomosapiensGN=HLA-BPE=1SV=1;sp|P30462|1B14_HUMANHLAclassIhistocompatibilityantigen,B-14alphachainOS=HomosapiensGN=HLA-BPE=1SV=1;sp|P30466|1B18_HUMANHLAclassIhistocompatibilityantigen,B-18alphachainOS=HomosapiensGN=HLA-BPE=1SV=1;…	sp|P30480|1B42_HUMANHLAclassIhistocompatibilityantigen,B-42alphachainOS=HomosapiensGN=HLA-BPE=1SV=1;sp|P30460|1B08_HUMANHLAclassIhistocompatibilityantigen,B-8alphachainOS=HomosapiensGN=HLA-BPE=1SV=1;sp|P30462|1B14_HUMANHLAclassIhistocompatibilityantigen,B-14alphachainOS=HomosapiensGN=HLA-BPE=1SV=1;sp|P30466|1B18_HUMANHLAclassIhistocompatibilityantigen,B-18alphachainOS=HomosapiensGN=HLA-BPE=1SV=1;…	10;10;9;8;8;8;7;7;6;6;6;6;5;4;4;2;2;2;2	10;10;9;8;8;8;7;7;6;6;6;6;5;4;4;2;2;2;2	0;0;0;0;0;0;0;0;0;0;0;0;0;0;0;0;0;0;0	;;;;;;;;;;;;	19	10	10	0	4	3	5	2	1	5	3	0	3	2	3	4	1	5	1	4	3	2	1	1	0	4	3	5	2	1	5	3	0	3	2	3	4	1	5	1	4	3	2	1
sp|P30479|1B41_HUMANHLAclassIhistocompatibilityantigen,B-41alphachainOS=HomosapiensGN=HLA-BPE=1SV=1	sp|P30479|1B41_HUMANHLAclassIhistocompatibilityantigen,B-41alphachainOS=HomosapiensGN=HLA-BPE=1SV=1	9	1	0		1	9	1	0	3	3	3	1	1	5	3	0	3	2	3	5	1	6	1	4	3	1	1	0	0	0	1	0	0	0	0	0	0	0	0	0	1	0	1	0	0	0	0	0
sp|Q29940|1B59_HUMANHLAclassIhistocompatibilityantigen,B-59alphachainOS=HomosapiensGN=HLA-BPE=1SV=1;sp|P30493|1B55_HUMANHLAclassIhistocompatibilityantigen,B-55alphachainOS=HomosapiensGN=HLA-BPE=1SV=1;sp|P18463|1B37_HUMANHLAclassIhistocompatibilityantigen,B-37alphachainOS=HomosapiensGN=HLA-BPE=1SV=1;sp|P30492|1B54_HUMANHLAclassIhistocompatibilityantigen,B-54alphachainOS=HomosapiensGN=HLA-BPE=1SV=1…	sp|Q29940|1B59_HUMANHLAclassIhistocompatibilityantigen,B-59alphachainOS=HomosapiensGN=HLA-BPE=1SV=1;sp|P30493|1B55_HUMANHLAclassIhistocompatibilityantigen,B-55alphachainOS=HomosapiensGN=HLA-BPE=1SV=1;sp|P18463|1B37_HUMANHLAclassIhistocompatibilityantigen,B-37alphachainOS=HomosapiensGN=HLA-BPE=1SV=1;sp|P30492|1B54_HUMANHLAclassIhistocompatibilityantigen,B-54alphachainOS=HomosapiensGN=HLA-BPE=1SV=1…	10;10;9;8;8;8;8;8;8;8;7;7;4;3	1;1;1;1;1;1;1;1;1;1;1;1;1;1	0;0;0;0;0;0;0;0;0;0;0;0;0;0	;;;;;;;;;;;	14	10	1	0	5	4	6	3	2	5	3	0	3	2	3	4	2	5	2	5	4	3	1	2	0	1	1	1	1	1	1	1	0	1	1	1	1	1	1	1	1	1	1	0
sp|P30501|1C02_HUMANHLAclassIhistocompatibilityantigen,Cw-2alphachainOS=HomosapiensGN=HLA-CPE=1SV=1	sp|P30501|1C02_HUMANHLAclassIhistocompatibilityantigen,Cw-2alphachainOS=HomosapiensGN=HLA-CPE=1SV=1	6	1	1		1	6	1	1	3	3	3	2	1	4	2	0	2	2	3	4	0	4	1	2	1	0	0	1	0	0	0	0	0	0	1	0	0	0	0	0	1	0	1	1	0	0	0	0
sp|P30520|PURA2_HUMANAdenylosuccinatesynthetaseisozyme2OS=HomosapiensGN=ADSSPE=1SV=3	sp|P30520|PURA2_HUMANAdenylosuccinatesynthetaseisozyme2OS=HomosapiensGN=ADSSPE=1SV=3	3	3	3		1	3	3	3	2	0	1	0	0	1	0	0	1	0	1	0	0	1	0	0	0	0	0	1	0	2	0	1	0	0	1	0	0	1	0	1	0	0	1	0	0	0	0	0
tr|C9J0K6|C9J0K6_HUMANSorcinOS=HomosapiensGN=SRIPE=1SV=1;sp|P30626|SORCN_HUMANSorcinOS=HomosapiensGN=SRIPE=1SV=1;tr|B4DHQ6|B4DHQ6_HUMANSorcinOS=HomosapiensGN=SRIPE=1SV=1	tr|C9J0K6|C9J0K6_HUMANSorcinOS=HomosapiensGN=SRIPE=1SV=1;sp|P30626|SORCN_HUMANSorcinOS=HomosapiensGN=SRIPE=1SV=1;tr|B4DHQ6|B4DHQ6_HUMANSorcinOS=HomosapiensGN=SRIPE=1SV=1	2;2;1	2;2;1	2;2;1	;;	3	2	2	2	1	1	0	1	0	0	0	0	0	0	2	1	1	2	1	0	0	0	0	0	0	1	1	0	1	0	0	0	0	0	0	2	1	1	2	1	0	0	0	0
sp|P30711|GSTT1_HUMANGlutathioneS-transferasetheta-1OS=HomosapiensGN=GSTT1PE=1SV=4;tr|A0A0G2JQD2|A0A0G2JQD2_HUMANGlutathioneS-transferasetheta-1(Fragment)OS=HomosapiensGN=GSTT1PE=1SV=1;tr|A0A0G2JQM0|A0A0G2JQM0_HUMANGlutathioneS-transferasetheta1,isoformCRA_fOS=HomosapiensGN=GSTT1PE=1SV=1;tr|A0A0G2JRN4|A0A0G2JRN4_HUMANGlutathioneS-transferasetheta1,isoformCRA_aOS=HomosapiensGN=GSTT1PE=1SV=1;tr|A0A…	sp|P30711|GSTT1_HUMANGlutathioneS-transferasetheta-1OS=HomosapiensGN=GSTT1PE=1SV=4;tr|A0A0G2JQD2|A0A0G2JQD2_HUMANGlutathioneS-transferasetheta-1(Fragment)OS=HomosapiensGN=GSTT1PE=1SV=1;tr|A0A0G2JQM0|A0A0G2JQM0_HUMANGlutathioneS-transferasetheta1,isoformCRA_fOS=HomosapiensGN=GSTT1PE=1SV=1;tr|A0A0G2JRN4|A0A0G2JRN4_HUMANGlutathioneS-transferasetheta1,isoformCRA_aOS=HomosapiensGN=GSTT1PE=1SV=1;tr|A0A…	4;3;3;3;3;2;2;2;2;2	4;3;3;3;3;2;2;2;2;2	4;3;3;3;3;2;2;2;2;2	;;;;;;;;;	10	4	4	4	0	0	0	0	1	3	0	0	2	2	2	0	1	2	0	0	0	0	0	0	0	0	0	0	0	1	3	0	0	2	2	2	0	1	2	0	0	0	0	0
sp|P30740|ILEU_HUMANLeukocyteelastaseinhibitorOS=HomosapiensGN=SERPINB1PE=1SV=1;tr|H7BXK7|H7BXK7_HUMANSerpinB8(Fragment)OS=HomosapiensGN=SERPINB8PE=1SV=1;tr|C9J7N5|C9J7N5_HUMANSerpinI2(Fragment)OS=HomosapiensGN=SERPINI2PE=1SV=1;tr|A0A1B0GU38|A0A1B0GU38_HUMANSerpinB8OS=HomosapiensGN=SERPINB8PE=1SV=1;sp|P50452|SPB8_HUMANSerpinB8OS=HomosapiensGN=SERPINB8PE=1SV=2;sp|P50453|SPB9_HUMANSerpinB9OS=Homosa…	sp|P30740|ILEU_HUMANLeukocyteelastaseinhibitorOS=HomosapiensGN=SERPINB1PE=1SV=1	15;1;1;1;1;1;1;1	15;1;1;1;1;1;1;1	15;1;1;1;1;1;1;1		8	15	15	15	7	4	6	5	1	12	7	0	9	5	0	0	1	1	0	0	0	1	0	1	0	7	4	6	5	1	12	7	0	9	5	0	0	1	1	0	0	0	1	0
tr|I3L3I9|I3L3I9_HUMANAldehydedehydrogenase,dimericNADP-preferringOS=HomosapiensGN=ALDH3A1PE=1SV=1;tr|A8MYB8|A8MYB8_HUMANAldehydedehydrogenase,dimericNADP-preferringOS=HomosapiensGN=ALDH3A1PE=1SV=1;sp|P30838|AL3A1_HUMANAldehydedehydrogenase,dimericNADP-preferringOS=HomosapiensGN=ALDH3A1PE=1SV=3;tr|C9JMC5|C9JMC5_HUMANAldehydedehydrogenase,dimericNADP-preferring(Fragment)OS=HomosapiensGN=ALDH3A1PE=…	tr|I3L3I9|I3L3I9_HUMANAldehydedehydrogenase,dimericNADP-preferringOS=HomosapiensGN=ALDH3A1PE=1SV=1;tr|A8MYB8|A8MYB8_HUMANAldehydedehydrogenase,dimericNADP-preferringOS=HomosapiensGN=ALDH3A1PE=1SV=1;sp|P30838|AL3A1_HUMANAldehydedehydrogenase,dimericNADP-preferringOS=HomosapiensGN=ALDH3A1PE=1SV=3;tr|C9JMC5|C9JMC5_HUMANAldehydedehydrogenase,dimericNADP-preferring(Fragment)OS=HomosapiensGN=ALDH3A1PE=…	2;2;2;1;1	2;2;2;1;1	2;2;2;1;1	;;;;	5	2	2	2	0	0	0	0	0	0	1	0	1	0	0	0	0	0	0	2	2	0	0	0	0	0	0	0	0	0	0	1	0	1	0	0	0	0	0	0	2	2	0	0
sp|P31025|LCN1_HUMANLipocalin-1OS=HomosapiensGN=LCN1PE=1SV=1;sp|Q5VSP4|LC1L1_HUMANPutativelipocalin1-likeprotein1OS=HomosapiensGN=LCN1P1PE=5SV=1	sp|P31025|LCN1_HUMANLipocalin-1OS=HomosapiensGN=LCN1PE=1SV=1	3;1	3;1	3;1		2	3	3	3	0	0	0	0	1	3	2	0	0	0	1	1	0	0	0	1	0	0	0	0	0	0	0	0	0	1	3	2	0	0	0	1	1	0	0	0	1	0	0	0
sp|P31146|COR1A_HUMANCoronin-1AOS=HomosapiensGN=CORO1APE=1SV=4;tr|H3BRY3|H3BRY3_HUMANCoroninOS=HomosapiensGN=CORO1APE=1SV=1;tr|H3BTU6|H3BTU6_HUMANCoronin(Fragment)OS=HomosapiensGN=CORO1APE=1SV=1;tr|H3BRJ0|H3BRJ0_HUMANCoronin(Fragment)OS=HomosapiensGN=CORO1APE=1SV=1;tr|H3BNA2|H3BNA2_HUMANCoronin(Fragment)OS=HomosapiensGN=CORO1APE=1SV=1;tr|H3BU76|H3BU76_HUMANCoronin(Fragment)OS=HomosapiensGN=CORO1A…	sp|P31146|COR1A_HUMANCoronin-1AOS=HomosapiensGN=CORO1APE=1SV=4;tr|H3BRY3|H3BRY3_HUMANCoroninOS=HomosapiensGN=CORO1APE=1SV=1	15;13;7;7;4;4;4	15;13;7;7;4;4;4	14;12;7;7;4;4;4	;	7	15	15	14	5	3	6	6	1	9	4	0	10	0	3	5	2	5	2	4	3	0	0	2	0	5	3	6	6	1	9	4	0	10	0	3	5	2	5	2	4	3	0	0
sp|P31689|DNJA1_HUMANDnaJhomologsubfamilyAmember1OS=HomosapiensGN=DNAJA1PE=1SV=2	sp|P31689|DNJA1_HUMANDnaJhomologsubfamilyAmember1OS=HomosapiensGN=DNAJA1PE=1SV=2	1	1	1		1	1	1	1	1	1	1	0	0	1	0	0	1	1	1	1	0	1	0	1	0	0	0	0	0	1	1	1	0	0	1	0	0	1	1	1	1	0	1	0	1	0	0	0
sp|P31939|PUR9_HUMANBifunctionalpurinebiosynthesisproteinPURHOS=HomosapiensGN=ATICPE=1SV=3;tr|H7C1S2|H7C1S2_HUMANBifunctionalpurinebiosynthesisproteinPURH(Fragment)OS=HomosapiensGN=ATICPE=1SV=1;tr|F8WEF0|F8WEF0_HUMANBifunctionalpurinebiosynthesisproteinPURHOS=HomosapiensGN=ATICPE=1SV=1;tr|C9JLK0|C9JLK0_HUMANBifunctionalpurinebiosynthesisproteinPURH(Fragment)OS=HomosapiensGN=ATICPE=1SV=1	sp|P31939|PUR9_HUMANBifunctionalpurinebiosynthesisproteinPURHOS=HomosapiensGN=ATICPE=1SV=3	8;3;2;2	8;3;2;2	8;3;2;2		4	8	8	8	2	2	2	3	0	8	4	0	6	0	1	0	0	1	0	2	1	1	0	1	0	2	2	2	3	0	8	4	0	6	0	1	0	0	1	0	2	1	1	0
tr|E5RGH4|E5RGH4_HUMANHeterogeneousnuclearribonucleoproteinH(Fragment)OS=HomosapiensGN=HNRNPH1PE=1SV=1;tr|E7EQJ0|E7EQJ0_HUMANHeterogeneousnuclearribonucleoproteinH(Fragment)OS=HomosapiensGN=HNRNPH1PE=1SV=1;tr|D6RAM1|D6RAM1_HUMANHeterogeneousnuclearribonucleoproteinH(Fragment)OS=HomosapiensGN=HNRNPH1PE=1SV=1;tr|H0YAQ2|H0YAQ2_HUMANHeterogeneousnuclearribonucleoproteinH(Fragment)OS=HomosapiensGN=HNR…	tr|E5RGH4|E5RGH4_HUMANHeterogeneousnuclearribonucleoproteinH(Fragment)OS=HomosapiensGN=HNRNPH1PE=1SV=1;tr|E7EQJ0|E7EQJ0_HUMANHeterogeneousnuclearribonucleoproteinH(Fragment)OS=HomosapiensGN=HNRNPH1PE=1SV=1;tr|D6RAM1|D6RAM1_HUMANHeterogeneousnuclearribonucleoproteinH(Fragment)OS=HomosapiensGN=HNRNPH1PE=1SV=1;tr|H0YAQ2|H0YAQ2_HUMANHeterogeneousnuclearribonucleoproteinH(Fragment)OS=HomosapiensGN=HNR…	1;1;1;1;1;1;1;1;1;1;1;1;1;1;1;1;1	1;1;1;1;1;1;1;1;1;1;1;1;1;1;1;1;1	1;1;1;1;1;1;1;1;1;1;1;1;1;1;1;1;1	;;;;;;;;;;;;;;;;	17	1	1	1	1	1	0	0	0	1	0	0	0	0	1	0	1	1	1	0	0	0	0	0	0	1	1	0	0	0	1	0	0	0	0	1	0	1	1	1	0	0	0	0
sp|P31946|1433B_HUMAN14-3-3proteinbeta/alphaOS=HomosapiensGN=YWHABPE=1SV=3;tr|Q4VY20|Q4VY20_HUMAN14-3-3proteinbeta/alpha(Fragment)OS=HomosapiensGN=YWHABPE=1SV=1;tr|Q4VY19|Q4VY19_HUMAN14-3-3proteinbeta/alpha(Fragment)OS=HomosapiensGN=YWHABPE=1SV=1;tr|A0A0J9YWE8|A0A0J9YWE8_HUMAN14-3-3proteinbeta/alphaOS=HomosapiensGN=YWHABPE=1SV=1;tr|A0A0J9YWZ2|A0A0J9YWZ2_HUMAN14-3-3proteinbeta/alpha(Fragment)OS=Ho…	sp|P31946|1433B_HUMAN14-3-3proteinbeta/alphaOS=HomosapiensGN=YWHABPE=1SV=3	8;3;3;3;2	5;2;2;2;1	4;1;1;1;1		5	8	5	4	4	3	3	4	1	4	3	0	3	1	5	4	3	5	2	2	1	0	0	0	1	3	2	2	3	1	1	1	0	1	0	4	3	2	4	2	1	0	0	0
sp|P31949|S10AB_HUMANProteinS100-A11OS=HomosapiensGN=S100A11PE=1SV=2	sp|P31949|S10AB_HUMANProteinS100-A11OS=HomosapiensGN=S100A11PE=1SV=2	8	8	8		1	8	8	8	3	4	4	4	1	2	2	1	2	2	2	2	2	2	0	5	4	1	2	2	2	3	4	4	4	1	2	2	1	2	2	2	2	2	2	0	5	4	1	2
sp|P31997|CEAM8_HUMANCarcinoembryonicantigen-relatedcelladhesionmolecule8OS=HomosapiensGN=CEACAM8PE=1SV=2	sp|P31997|CEAM8_HUMANCarcinoembryonicantigen-relatedcelladhesionmolecule8OS=HomosapiensGN=CEACAM8PE=1SV=2	2	1	1		1	2	1	1	1	0	1	1	1	1	0	0	1	0	2	1	0	1	0	0	0	0	0	1	0	0	0	0	0	0	0	0	0	0	0	1	1	0	1	0	0	0	0	0
sp|P32119|PRDX2_HUMANPeroxiredoxin-2OS=HomosapiensGN=PRDX2PE=1SV=5;tr|A6NIW5|A6NIW5_HUMANPeroxiredoxin2,isoformCRA_aOS=HomosapiensGN=PRDX2PE=1SV=2	sp|P32119|PRDX2_HUMANPeroxiredoxin-2OS=HomosapiensGN=PRDX2PE=1SV=5	3;1	2;1	2;1		2	3	2	2	3	1	2	2	2	3	3	0	3	2	0	1	1	1	1	1	1	0	0	0	0	2	1	1	1	1	2	2	0	2	1	0	0	0	0	1	0	0	0	0
sp|Q14409|GLPK3_HUMANGlycerolkinase3OS=HomosapiensGN=GK3PPE=2SV=2;sp|P32189|GLPK_HUMANGlycerolkinaseOS=HomosapiensGN=GKPE=1SV=3	sp|Q14409|GLPK3_HUMANGlycerolkinase3OS=HomosapiensGN=GK3PPE=2SV=2;sp|P32189|GLPK_HUMANGlycerolkinaseOS=HomosapiensGN=GKPE=1SV=3	1;1	1;1	1;1	;	2	1	1	1	0	0	1	1	0	0	0	0	0	0	0	1	0	1	0	0	0	0	0	0	0	0	0	1	1	0	0	0	0	0	0	0	1	0	1	0	0	0	0	0
sp|P32320|CDD_HUMANCytidinedeaminaseOS=HomosapiensGN=CDAPE=1SV=2	sp|P32320|CDD_HUMANCytidinedeaminaseOS=HomosapiensGN=CDAPE=1SV=2	1	1	1		1	1	1	1	0	0	1	1	0	0	0	0	0	0	1	1	0	1	0	0	0	0	0	0	0	0	0	1	1	0	0	0	0	0	0	1	1	0	1	0	0	0	0	0
sp|P32455|GBP1_HUMANGuanylate-bindingprotein1OS=HomosapiensGN=GBP1PE=1SV=2	sp|P32455|GBP1_HUMANGuanylate-bindingprotein1OS=HomosapiensGN=GBP1PE=1SV=2	6	6	6		1	6	6	6	2	0	1	0	2	2	5	1	3	0	0	1	0	2	0	0	0	0	0	0	0	2	0	1	0	2	2	5	1	3	0	0	1	0	2	0	0	0	0	0
tr|H0Y9U7|H0Y9U7_HUMANLong-chain-fatty-acid--CoAligase1(Fragment)OS=HomosapiensGN=ACSL1PE=1SV=1;tr|B7Z3Z9|B7Z3Z9_HUMANLong-chain-fatty-acid--CoAligase1OS=HomosapiensGN=ACSL1PE=1SV=1;tr|E7EPM6|E7EPM6_HUMANLong-chain-fatty-acid--CoAligase1OS=HomosapiensGN=ACSL1PE=1SV=1;sp|P33121|ACSL1_HUMANLong-chain-fatty-acid--CoAligase1OS=HomosapiensGN=ACSL1PE=1SV=1	tr|H0Y9U7|H0Y9U7_HUMANLong-chain-fatty-acid--CoAligase1(Fragment)OS=HomosapiensGN=ACSL1PE=1SV=1;tr|B7Z3Z9|B7Z3Z9_HUMANLong-chain-fatty-acid--CoAligase1OS=HomosapiensGN=ACSL1PE=1SV=1;tr|E7EPM6|E7EPM6_HUMANLong-chain-fatty-acid--CoAligase1OS=HomosapiensGN=ACSL1PE=1SV=1;sp|P33121|ACSL1_HUMANLong-chain-fatty-acid--CoAligase1OS=HomosapiensGN=ACSL1PE=1SV=1	1;1;1;1	1;1;1;1	1;1;1;1	;;;	4	1	1	1	0	0	0	0	0	0	0	0	1	0	0	1	0	1	0	0	0	0	0	0	0	0	0	0	0	0	0	0	0	1	0	0	1	0	1	0	0	0	0	0
tr|C9JKF7|C9JKF7_HUMANLymphocyte-specificprotein1(Fragment)OS=HomosapiensGN=LSP1PE=1SV=1;tr|C9JU59|C9JU59_HUMANLymphocyte-specificprotein1(Fragment)OS=HomosapiensGN=LSP1PE=1SV=1;tr|E9PBD8|E9PBD8_HUMANLymphocyte-specificprotein1(Fragment)OS=HomosapiensGN=LSP1PE=1SV=1;tr|E7EMG9|E7EMG9_HUMANLymphocyte-specificprotein1(Fragment)OS=HomosapiensGN=LSP1PE=1SV=1;sp|P33241|LSP1_HUMANLymphocyte-specificprot…	tr|C9JKF7|C9JKF7_HUMANLymphocyte-specificprotein1(Fragment)OS=HomosapiensGN=LSP1PE=1SV=1;tr|C9JU59|C9JU59_HUMANLymphocyte-specificprotein1(Fragment)OS=HomosapiensGN=LSP1PE=1SV=1;tr|E9PBD8|E9PBD8_HUMANLymphocyte-specificprotein1(Fragment)OS=HomosapiensGN=LSP1PE=1SV=1;tr|E7EMG9|E7EMG9_HUMANLymphocyte-specificprotein1(Fragment)OS=HomosapiensGN=LSP1PE=1SV=1;sp|P33241|LSP1_HUMANLymphocyte-specificprot…	1;1;1;1;1	1;1;1;1;1	1;1;1;1;1	;;;;	5	1	1	1	0	0	0	0	0	0	0	0	0	0	0	1	0	1	1	0	0	0	0	0	0	0	0	0	0	0	0	0	0	0	0	0	1	0	1	1	0	0	0	0
sp|P34932|HSP74_HUMANHeatshock70kDaprotein4OS=HomosapiensGN=HSPA4PE=1SV=4;tr|A0A087WTS8|A0A087WTS8_HUMANHeatshock70kDaprotein4OS=HomosapiensGN=HSPA4PE=1SV=1;tr|A0A087WYC1|A0A087WYC1_HUMANHeatshock70kDaprotein4OS=HomosapiensGN=HSPA4PE=1SV=1	sp|P34932|HSP74_HUMANHeatshock70kDaprotein4OS=HomosapiensGN=HSPA4PE=1SV=4;tr|A0A087WTS8|A0A087WTS8_HUMANHeatshock70kDaprotein4OS=HomosapiensGN=HSPA4PE=1SV=1;tr|A0A087WYC1|A0A087WYC1_HUMANHeatshock70kDaprotein4OS=HomosapiensGN=HSPA4PE=1SV=1	9;8;8	7;6;6	7;6;6	;;	3	9	7	7	2	1	1	0	0	8	5	0	6	1	0	1	0	3	0	0	0	1	1	0	1	2	0	0	0	0	6	4	0	4	1	0	1	0	3	0	0	0	1	1
tr|C9J712|C9J712_HUMANProfilinOS=HomosapiensGN=PFN2PE=1SV=1;tr|C9J0J7|C9J0J7_HUMANProfilinOS=HomosapiensGN=PFN2PE=1SV=1;tr|C9JQ45|C9JQ45_HUMANProfilinOS=HomosapiensGN=PFN2PE=1SV=1;sp|P35080|PROF2_HUMANProfilin-2OS=HomosapiensGN=PFN2PE=1SV=3;tr|G5E9Q6|G5E9Q6_HUMANProfilinOS=HomosapiensGN=PFN2PE=1SV=1;tr|C9J2N0|C9J2N0_HUMANProfilinOS=HomosapiensGN=PFN2PE=1SV=1	tr|C9J712|C9J712_HUMANProfilinOS=HomosapiensGN=PFN2PE=1SV=1;tr|C9J0J7|C9J0J7_HUMANProfilinOS=HomosapiensGN=PFN2PE=1SV=1;tr|C9JQ45|C9JQ45_HUMANProfilinOS=HomosapiensGN=PFN2PE=1SV=1;sp|P35080|PROF2_HUMANProfilin-2OS=HomosapiensGN=PFN2PE=1SV=3;tr|G5E9Q6|G5E9Q6_HUMANProfilinOS=HomosapiensGN=PFN2PE=1SV=1;tr|C9J2N0|C9J2N0_HUMANProfilinOS=HomosapiensGN=PFN2PE=1SV=1	2;2;2;2;2;1	2;2;2;2;2;1	2;2;2;2;2;1	;;;;;	6	2	2	2	1	0	0	0	1	2	1	0	2	1	1	0	0	0	0	0	0	0	0	0	0	1	0	0	0	1	2	1	0	2	1	1	0	0	0	0	0	0	0	0
tr|C9JZ20|C9JZ20_HUMANProhibitin(Fragment)OS=HomosapiensGN=PHBPE=1SV=1;tr|E7ESE2|E7ESE2_HUMANProhibitin(Fragment)OS=HomosapiensGN=PHBPE=1SV=2;tr|E9PCW0|E9PCW0_HUMANProhibitin(Fragment)OS=HomosapiensGN=PHBPE=1SV=2;tr|C9JW96|C9JW96_HUMANProhibitin(Fragment)OS=HomosapiensGN=PHBPE=1SV=2;sp|P35232|PHB_HUMANProhibitinOS=HomosapiensGN=PHBPE=1SV=1;tr|D6RBK0|D6RBK0_HUMANProhibitin(Fragment)OS=HomosapiensG…	tr|C9JZ20|C9JZ20_HUMANProhibitin(Fragment)OS=HomosapiensGN=PHBPE=1SV=1;tr|E7ESE2|E7ESE2_HUMANProhibitin(Fragment)OS=HomosapiensGN=PHBPE=1SV=2;tr|E9PCW0|E9PCW0_HUMANProhibitin(Fragment)OS=HomosapiensGN=PHBPE=1SV=2;tr|C9JW96|C9JW96_HUMANProhibitin(Fragment)OS=HomosapiensGN=PHBPE=1SV=2;sp|P35232|PHB_HUMANProhibitinOS=HomosapiensGN=PHBPE=1SV=1	3;3;3;3;3;1	3;3;3;3;3;1	3;3;3;3;3;1	;;;;	6	3	3	3	0	0	0	0	0	1	1	0	1	0	0	2	1	3	0	0	0	0	0	0	0	0	0	0	0	0	1	1	0	1	0	0	2	1	3	0	0	0	0	0
sp|P35237|SPB6_HUMANSerpinB6OS=HomosapiensGN=SERPINB6PE=1SV=3;tr|A0A024QZX5|A0A024QZX5_HUMANSerpinB6OS=HomosapiensGN=SERPINB6PE=1SV=1;tr|A0A087X1N8|A0A087X1N8_HUMANSerpinB6OS=HomosapiensGN=SERPINB6PE=1SV=1	sp|P35237|SPB6_HUMANSerpinB6OS=HomosapiensGN=SERPINB6PE=1SV=3;tr|A0A024QZX5|A0A024QZX5_HUMANSerpinB6OS=HomosapiensGN=SERPINB6PE=1SV=1;tr|A0A087X1N8|A0A087X1N8_HUMANSerpinB6OS=HomosapiensGN=SERPINB6PE=1SV=1	6;6;6	6;6;6	6;6;6	;;	3	6	6	6	4	3	1	2	1	5	4	0	4	4	1	1	0	2	0	3	0	1	0	1	0	4	3	1	2	1	5	4	0	4	4	1	1	0	2	0	3	0	1	0
sp|P35247|SFTPD_HUMANPulmonarysurfactant-associatedproteinDOS=HomosapiensGN=SFTPDPE=1SV=3;tr|Q5T0M2|Q5T0M2_HUMANPulmonarysurfactant-associatedproteinD(Fragment)OS=HomosapiensGN=SFTPDPE=4SV=1	sp|P35247|SFTPD_HUMANPulmonarysurfactant-associatedproteinDOS=HomosapiensGN=SFTPDPE=1SV=3	16;4	16;4	16;4		2	16	16	16	12	10	12	12	6	9	7	0	9	8	8	7	6	7	0	10	11	1	1	1	1	12	10	12	12	6	9	7	0	9	8	8	7	6	7	0	10	11	1	1
sp|P35573|GDE_HUMANGlycogendebranchingenzymeOS=HomosapiensGN=AGLPE=1SV=3	sp|P35573|GDE_HUMANGlycogendebranchingenzymeOS=HomosapiensGN=AGLPE=1SV=3	2	2	2		1	2	2	2	0	1	0	0	0	1	0	0	1	0	1	2	0	2	0	0	0	0	0	0	0	0	1	0	0	0	1	0	0	1	0	1	2	0	2	0	0	0	0	0
sp|P35579|MYH9_HUMANMyosin-9OS=HomosapiensGN=MYH9PE=1SV=4;sp|P35580|MYH10_HUMANMyosin-10OS=HomosapiensGN=MYH10PE=1SV=3;sp|P35749|MYH11_HUMANMyosin-11OS=HomosapiensGN=MYH11PE=1SV=3;tr|Q5BKV1|Q5BKV1_HUMANMYH9proteinOS=HomosapiensGN=MYH9PE=1SV=1;tr|B1AH99|B1AH99_HUMANMyosin-9(Fragment)OS=HomosapiensGN=MYH9PE=1SV=1;tr|E7ERA5|E7ERA5_HUMANMyosin-10(Fragment)OS=HomosapiensGN=MYH10PE=1SV=8;sp|P12883|MYH7…	sp|P35579|MYH9_HUMANMyosin-9OS=HomosapiensGN=MYH9PE=1SV=4	149;18;14;12;7;2;1;1;1;1;1;1;1;1;1;1	149;18;14;12;7;2;1;1;1;1;1;1;1;1;1;1	139;12;5;10;7;1;0;0;0;0;0;0;0;0;0;0		16	149	149	139	85	59	74	78	44	105	81	3	94	60	62	63	30	75	5	56	24	7	4	16	4	85	59	74	78	44	105	81	3	94	60	62	63	30	75	5	56	24	7	4
tr|H0YAC7|H0YAC7_HUMANCoatomersubunitbeta'(Fragment)OS=HomosapiensGN=COPB2PE=1SV=1;sp|P35606|COPB2_HUMANCoatomersubunitbeta'OS=HomosapiensGN=COPB2PE=1SV=2	tr|H0YAC7|H0YAC7_HUMANCoatomersubunitbeta'(Fragment)OS=HomosapiensGN=COPB2PE=1SV=1;sp|P35606|COPB2_HUMANCoatomersubunitbeta'OS=HomosapiensGN=COPB2PE=1SV=2	1;1	1;1	1;1	;	2	1	1	1	0	0	0	0	0	0	0	0	0	0	0	0	0	1	0	0	0	0	0	0	0	0	0	0	0	0	0	0	0	0	0	0	0	0	1	0	0	0	0	0
tr|A0A087WUV8|A0A087WUV8_HUMANBasiginOS=HomosapiensGN=BSGPE=1SV=1;tr|A0A087X2B5|A0A087X2B5_HUMANBasigin(Fragment)OS=HomosapiensGN=BSGPE=1SV=1;sp|P35613|BASI_HUMANBasiginOS=HomosapiensGN=BSGPE=1SV=2;tr|R4GN83|R4GN83_HUMANBasigin(Fragment)OS=HomosapiensGN=BSGPE=1SV=1;tr|R4GMX5|R4GMX5_HUMANBasigin(Fragment)OS=HomosapiensGN=BSGPE=1SV=1;tr|I3L192|I3L192_HUMANBasigin(Fragment)OS=HomosapiensGN=BSGPE=1SV…	tr|A0A087WUV8|A0A087WUV8_HUMANBasiginOS=HomosapiensGN=BSGPE=1SV=1;tr|A0A087X2B5|A0A087X2B5_HUMANBasigin(Fragment)OS=HomosapiensGN=BSGPE=1SV=1;sp|P35613|BASI_HUMANBasiginOS=HomosapiensGN=BSGPE=1SV=2;tr|R4GN83|R4GN83_HUMANBasigin(Fragment)OS=HomosapiensGN=BSGPE=1SV=1;tr|R4GMX5|R4GMX5_HUMANBasigin(Fragment)OS=HomosapiensGN=BSGPE=1SV=1;tr|I3L192|I3L192_HUMANBasigin(Fragment)OS=HomosapiensGN=BSGPE=1SV…	2;2;2;1;1;1	2;2;2;1;1;1	2;2;2;1;1;1	;;;;;	6	2	2	2	1	1	1	1	0	0	0	0	0	0	2	2	0	2	0	0	0	1	0	0	0	1	1	1	1	0	0	0	0	0	0	2	2	0	2	0	0	0	1	0
sp|P35858|ALS_HUMANInsulin-likegrowthfactor-bindingproteincomplexacidlabilesubunitOS=HomosapiensGN=IGFALSPE=1SV=1	sp|P35858|ALS_HUMANInsulin-likegrowthfactor-bindingproteincomplexacidlabilesubunitOS=HomosapiensGN=IGFALSPE=1SV=1	2	2	2		1	2	2	2	1	0	0	0	0	1	0	0	1	0	0	1	1	0	1	0	0	0	0	1	0	1	0	0	0	0	1	0	0	1	0	0	1	1	0	1	0	0	0	0
sp|P35908|K22E_HUMANKeratin,typeIIcytoskeletal2epidermalOS=HomosapiensGN=KRT2PE=1SV=2;CON__P35908;sp|Q01546|K22O_HUMANKeratin,typeIIcytoskeletal2oralOS=HomosapiensGN=KRT76PE=1SV=2;CON__Q01546;CON__Q6NXH9;sp|Q7Z794|K2C1B_HUMANKeratin,typeIIcytoskeletal1bOS=HomosapiensGN=KRT77PE=1SV=3;CON__Q7Z794;CON__Q9R0H5	sp|P35908|K22E_HUMANKeratin,typeIIcytoskeletal2epidermalOS=HomosapiensGN=KRT2PE=1SV=2;CON__P35908	32;31;8;7;4;3;3;2	29;28;7;6;3;1;1;1	17;16;0;0;0;0;0;0	;	8	32	29	17	21	14	17	18	6	12	5	1	13	7	16	21	17	22	4	1	2	1	2	7	2	19	13	15	16	4	10	4	0	11	5	14	19	14	20	3	1	2	1	2
sp|P35998|PRS7_HUMAN26Sproteasomeregulatorysubunit7OS=HomosapiensGN=PSMC2PE=1SV=3;tr|A0A1W2PQS1|A0A1W2PQS1_HUMAN26Sproteasomeregulatorysubunit7OS=HomosapiensGN=PSMC2PE=1SV=1;tr|C9JLS9|C9JLS9_HUMAN26Sproteasomeregulatorysubunit7(Fragment)OS=HomosapiensGN=PSMC2PE=1SV=1	sp|P35998|PRS7_HUMAN26Sproteasomeregulatorysubunit7OS=HomosapiensGN=PSMC2PE=1SV=3;tr|A0A1W2PQS1|A0A1W2PQS1_HUMAN26Sproteasomeregulatorysubunit7OS=HomosapiensGN=PSMC2PE=1SV=1	3;2;1	3;2;1	3;2;1	;	3	3	3	3	0	0	0	1	0	2	0	0	1	0	1	2	0	1	0	1	1	0	0	0	0	0	0	0	1	0	2	0	0	1	0	1	2	0	1	0	1	1	0	0
sp|P36405|ARL3_HUMANADP-ribosylationfactor-likeprotein3OS=HomosapiensGN=ARL3PE=1SV=2	sp|P36405|ARL3_HUMANADP-ribosylationfactor-likeprotein3OS=HomosapiensGN=ARL3PE=1SV=2	1	1	1		1	1	1	1	0	0	1	1	0	1	0	1	1	0	0	0	0	0	0	0	0	0	0	0	0	0	0	1	1	0	1	0	1	1	0	0	0	0	0	0	0	0	0	0
sp|P36507|MP2K2_HUMANDualspecificitymitogen-activatedproteinkinasekinase2OS=HomosapiensGN=MAP2K2PE=1SV=1;tr|M0R1B6|M0R1B6_HUMANDual-specificitymitogen-activatedproteinkinasekinase2(Fragment)OS=HomosapiensGN=MAP2K2PE=1SV=1;tr|G5E9C7|G5E9C7_HUMANDual-specificitymitogen-activatedproteinkinasekinase2OS=HomosapiensGN=MAP2K2PE=1SV=1	sp|P36507|MP2K2_HUMANDualspecificitymitogen-activatedproteinkinasekinase2OS=HomosapiensGN=MAP2K2PE=1SV=1	3;1;1	2;1;1	2;1;1		3	3	2	2	2	0	0	0	0	1	1	0	1	1	1	1	0	1	0	0	0	2	2	0	0	2	0	0	0	0	1	0	0	1	0	1	1	0	1	0	0	0	1	1
tr|H3BM89|H3BM89_HUMAN60SribosomalproteinL4OS=HomosapiensGN=RPL4PE=1SV=1;sp|P36578|RL4_HUMAN60SribosomalproteinL4OS=HomosapiensGN=RPL4PE=1SV=5;tr|H3BU31|H3BU31_HUMAN60SribosomalproteinL4(Fragment)OS=HomosapiensGN=RPL4PE=1SV=1	tr|H3BM89|H3BM89_HUMAN60SribosomalproteinL4OS=HomosapiensGN=RPL4PE=1SV=1;sp|P36578|RL4_HUMAN60SribosomalproteinL4OS=HomosapiensGN=RPL4PE=1SV=5	9;9;1	9;9;1	9;9;1	;	3	9	9	9	1	2	1	2	0	5	1	1	5	1	3	2	4	3	0	3	2	1	1	1	0	1	2	1	2	0	5	1	1	5	1	3	2	4	3	0	3	2	1	1
sp|P36871|PGM1_HUMANPhosphoglucomutase-1OS=HomosapiensGN=PGM1PE=1SV=3	sp|P36871|PGM1_HUMANPhosphoglucomutase-1OS=HomosapiensGN=PGM1PE=1SV=3	8	8	8		1	8	8	8	1	1	2	1	0	5	3	0	4	0	2	4	0	5	0	0	1	3	1	0	0	1	1	2	1	0	5	3	0	4	0	2	4	0	5	0	0	1	3	1
tr|E9PMD7|E9PMD7_HUMANSerine/threonine-proteinphosphatase(Fragment)OS=HomosapiensGN=PPP1CAPE=1SV=1;tr|F8VYE8|F8VYE8_HUMANSerine/threonine-proteinphosphataseOS=HomosapiensGN=PPP1CCPE=1SV=1;sp|P36873|PP1G_HUMANSerine/threonine-proteinphosphatasePP1-gammacatalyticsubunitOS=HomosapiensGN=PPP1CCPE=1SV=1;sp|P62140|PP1B_HUMANSerine/threonine-proteinphosphatasePP1-betacatalyticsubunitOS=HomosapiensGN=PPP…	tr|E9PMD7|E9PMD7_HUMANSerine/threonine-proteinphosphatase(Fragment)OS=HomosapiensGN=PPP1CAPE=1SV=1;tr|F8VYE8|F8VYE8_HUMANSerine/threonine-proteinphosphataseOS=HomosapiensGN=PPP1CCPE=1SV=1;sp|P36873|PP1G_HUMANSerine/threonine-proteinphosphatasePP1-gammacatalyticsubunitOS=HomosapiensGN=PPP1CCPE=1SV=1;sp|P62140|PP1B_HUMANSerine/threonine-proteinphosphatasePP1-betacatalyticsubunitOS=HomosapiensGN=PPP…	2;2;2;2;2;2;1	2;2;2;2;2;2;1	2;2;2;2;2;2;1	;;;;;;	7	2	2	2	0	1	1	1	0	0	0	0	0	0	1	2	0	1	0	0	0	0	0	0	0	0	1	1	1	0	0	0	0	0	0	1	2	0	1	0	0	0	0	0
sp|P36955|PEDF_HUMANPigmentepithelium-derivedfactorOS=HomosapiensGN=SERPINF1PE=1SV=4;tr|I3L4N7|I3L4N7_HUMANPigmentepithelium-derivedfactor(Fragment)OS=HomosapiensGN=SERPINF1PE=1SV=1;CON__Q95121;tr|I3L4F9|I3L4F9_HUMANPigmentepithelium-derivedfactor(Fragment)OS=HomosapiensGN=SERPINF1PE=1SV=8;tr|I3L107|I3L107_HUMANPigmentepithelium-derivedfactor(Fragment)OS=HomosapiensGN=SERPINF1PE=1SV=1;tr|I3L4Z0|I…	sp|P36955|PEDF_HUMANPigmentepithelium-derivedfactorOS=HomosapiensGN=SERPINF1PE=1SV=4	14;6;5;3;3;2;2;1;1;1	14;6;5;3;3;2;2;1;1;1	14;6;5;3;3;2;2;1;1;1		10	14	14	14	7	4	6	6	0	10	11	0	7	3	1	3	5	3	0	4	1	0	0	0	0	7	4	6	6	0	10	11	0	7	3	1	3	5	3	0	4	1	0	0
tr|K7ERP4|K7ERP4_HUMANGlutathioneperoxidase(Fragment)OS=HomosapiensGN=GPX4PE=1SV=1;tr|A0A087X2I2|A0A087X2I2_HUMANGlutathioneperoxidaseOS=HomosapiensGN=GPX4PE=1SV=1;sp|P36969|GPX4_HUMANPhospholipidhydroperoxideglutathioneperoxidase,mitochondrialOS=HomosapiensGN=GPX4PE=1SV=3;tr|A0A087WT12|A0A087WT12_HUMANGlutathioneperoxidaseOS=HomosapiensGN=GPX4PE=1SV=1;tr|A0A0A0MTT1|A0A0A0MTT1_HUMANGlutathioneper…	tr|K7ERP4|K7ERP4_HUMANGlutathioneperoxidase(Fragment)OS=HomosapiensGN=GPX4PE=1SV=1;tr|A0A087X2I2|A0A087X2I2_HUMANGlutathioneperoxidaseOS=HomosapiensGN=GPX4PE=1SV=1;sp|P36969|GPX4_HUMANPhospholipidhydroperoxideglutathioneperoxidase,mitochondrialOS=HomosapiensGN=GPX4PE=1SV=3;tr|A0A087WT12|A0A087WT12_HUMANGlutathioneperoxidaseOS=HomosapiensGN=GPX4PE=1SV=1;tr|A0A0A0MTT1|A0A0A0MTT1_HUMANGlutathioneper…	3;3;3;3;2;2;2;2;2	3;3;3;3;2;2;2;2;2	3;3;3;3;2;2;2;2;2	;;;;;;;;	9	3	3	3	1	0	0	0	1	2	1	0	1	1	1	2	0	2	0	0	0	0	0	0	0	1	0	0	0	1	2	1	0	1	1	1	2	0	2	0	0	0	0	0
sp|P37802|TAGL2_HUMANTransgelin-2OS=HomosapiensGN=TAGLN2PE=1SV=3;tr|X6RJP6|X6RJP6_HUMANTransgelin-2(Fragment)OS=HomosapiensGN=TAGLN2PE=1SV=1;tr|C9J5W6|C9J5W6_HUMANTransgelin-3OS=HomosapiensGN=TAGLN3PE=1SV=1;sp|Q9UI15|TAGL3_HUMANTransgelin-3OS=HomosapiensGN=TAGLN3PE=1SV=2	sp|P37802|TAGL2_HUMANTransgelin-2OS=HomosapiensGN=TAGLN2PE=1SV=3;tr|X6RJP6|X6RJP6_HUMANTransgelin-2(Fragment)OS=HomosapiensGN=TAGLN2PE=1SV=1	11;10;1;1	11;10;1;1	11;10;1;1	;	4	11	11	11	6	4	3	4	1	5	4	0	5	5	2	3	2	4	0	4	0	2	1	1	1	6	4	3	4	1	5	4	0	5	5	2	3	2	4	0	4	0	2	1
sp|P37837|TALDO_HUMANTransaldolaseOS=HomosapiensGN=TALDO1PE=1SV=2;tr|F2Z393|F2Z393_HUMANTransaldolaseOS=HomosapiensGN=TALDO1PE=1SV=1	sp|P37837|TALDO_HUMANTransaldolaseOS=HomosapiensGN=TALDO1PE=1SV=2;tr|F2Z393|F2Z393_HUMANTransaldolaseOS=HomosapiensGN=TALDO1PE=1SV=1	5;4	5;4	5;4	;	2	5	5	5	3	1	1	1	0	3	2	0	3	0	3	3	2	3	2	0	1	0	0	1	0	3	1	1	1	0	3	2	0	3	0	3	3	2	3	2	0	1	0	0
sp|P38606|VATA_HUMANV-typeprotonATPasecatalyticsubunitAOS=HomosapiensGN=ATP6V1APE=1SV=2;tr|C9JA17|C9JA17_HUMANV-typeprotonATPasecatalyticsubunitA(Fragment)OS=HomosapiensGN=ATP6V1APE=1SV=8;tr|C9JVW8|C9JVW8_HUMANV-typeprotonATPasecatalyticsubunitA(Fragment)OS=HomosapiensGN=ATP6V1APE=1SV=1	sp|P38606|VATA_HUMANV-typeprotonATPasecatalyticsubunitAOS=HomosapiensGN=ATP6V1APE=1SV=2	6;1;1	6;1;1	6;1;1		3	6	6	6	1	1	0	1	0	3	2	0	5	0	1	0	1	2	0	1	0	1	1	0	0	1	1	0	1	0	3	2	0	5	0	1	0	1	2	0	1	0	1	1
sp|P39023|RL3_HUMAN60SribosomalproteinL3OS=HomosapiensGN=RPL3PE=1SV=2;tr|H7C3M2|H7C3M2_HUMAN60SribosomalproteinL3(Fragment)OS=HomosapiensGN=RPL3PE=1SV=1;tr|B5MCW2|B5MCW2_HUMAN60SribosomalproteinL3(Fragment)OS=HomosapiensGN=RPL3PE=1SV=1;tr|H7C422|H7C422_HUMAN60SribosomalproteinL3(Fragment)OS=HomosapiensGN=RPL3PE=1SV=1;tr|G5E9G0|G5E9G0_HUMAN60SribosomalproteinL3OS=HomosapiensGN=RPL3PE=1SV=1;tr|F8WC…	sp|P39023|RL3_HUMAN60SribosomalproteinL3OS=HomosapiensGN=RPL3PE=1SV=2;tr|H7C3M2|H7C3M2_HUMAN60SribosomalproteinL3(Fragment)OS=HomosapiensGN=RPL3PE=1SV=1;tr|B5MCW2|B5MCW2_HUMAN60SribosomalproteinL3(Fragment)OS=HomosapiensGN=RPL3PE=1SV=1;tr|H7C422|H7C422_HUMAN60SribosomalproteinL3(Fragment)OS=HomosapiensGN=RPL3PE=1SV=1;tr|G5E9G0|G5E9G0_HUMAN60SribosomalproteinL3OS=HomosapiensGN=RPL3PE=1SV=1;tr|F8WC…	4;3;3;3;3;2	4;3;3;3;3;2	4;3;3;3;3;2	;;;;;	6	4	4	4	0	0	1	1	0	1	1	0	1	0	1	1	3	1	0	0	0	0	0	0	0	0	0	1	1	0	1	1	0	1	0	1	1	3	1	0	0	0	0	0
sp|P40121|CAPG_HUMANMacrophage-cappingproteinOS=HomosapiensGN=CAPGPE=1SV=2;tr|E7ENU9|E7ENU9_HUMANMacrophage-cappingprotein(Fragment)OS=HomosapiensGN=CAPGPE=1SV=1;tr|B8ZZL6|B8ZZL6_HUMANMacrophage-cappingprotein(Fragment)OS=HomosapiensGN=CAPGPE=1SV=1;tr|H7C0X8|H7C0X8_HUMANMacrophage-cappingprotein(Fragment)OS=HomosapiensGN=CAPGPE=1SV=1	sp|P40121|CAPG_HUMANMacrophage-cappingproteinOS=HomosapiensGN=CAPGPE=1SV=2;tr|E7ENU9|E7ENU9_HUMANMacrophage-cappingprotein(Fragment)OS=HomosapiensGN=CAPGPE=1SV=1;tr|B8ZZL6|B8ZZL6_HUMANMacrophage-cappingprotein(Fragment)OS=HomosapiensGN=CAPGPE=1SV=1	10;7;6;2	10;7;6;2	10;7;6;2	;;	4	10	10	10	8	3	5	5	0	6	3	0	6	2	2	4	2	5	1	6	4	1	1	0	1	8	3	5	5	0	6	3	0	6	2	2	4	2	5	1	6	4	1	1
sp|P40227|TCPZ_HUMANT-complexprotein1subunitzetaOS=HomosapiensGN=CCT6APE=1SV=3	sp|P40227|TCPZ_HUMANT-complexprotein1subunitzetaOS=HomosapiensGN=CCT6APE=1SV=3	5	5	5		1	5	5	5	1	1	1	2	1	4	4	0	3	1	1	0	0	4	0	0	1	2	0	1	0	1	1	1	2	1	4	4	0	3	1	1	0	0	4	0	0	1	2	0
tr|J3QQN1|J3QQN1_HUMANProteasomesubunitbetatype-10(Fragment)OS=HomosapiensGN=PSMB10PE=1SV=1;sp|P40306|PSB10_HUMANProteasomesubunitbetatype-10OS=HomosapiensGN=PSMB10PE=1SV=1;tr|J3QL48|J3QL48_HUMANUncharacterizedprotein(Fragment)OS=HomosapiensPE=4SV=1	tr|J3QQN1|J3QQN1_HUMANProteasomesubunitbetatype-10(Fragment)OS=HomosapiensGN=PSMB10PE=1SV=1;sp|P40306|PSB10_HUMANProteasomesubunitbetatype-10OS=HomosapiensGN=PSMB10PE=1SV=1;tr|J3QL48|J3QL48_HUMANUncharacterizedprotein(Fragment)OS=HomosapiensPE=4SV=1	2;2;1	2;2;1	2;2;1	;;	3	2	2	2	2	1	2	2	0	2	0	0	2	0	1	1	0	1	0	1	0	0	0	0	0	2	1	2	2	0	2	0	0	2	0	1	1	0	1	0	1	0	0	0
tr|M0QZU1|M0QZU1_HUMAN60SribosomalproteinL13aOS=HomosapiensGN=RPL13APE=1SV=1;tr|A0A096LPE0|A0A096LPE0_HUMAN60SribosomalproteinL13aOS=HomosapiensGN=RPL13APE=1SV=1;sp|P40429|RL13A_HUMAN60SribosomalproteinL13aOS=HomosapiensGN=RPL13APE=1SV=2	tr|M0QZU1|M0QZU1_HUMAN60SribosomalproteinL13aOS=HomosapiensGN=RPL13APE=1SV=1;tr|A0A096LPE0|A0A096LPE0_HUMAN60SribosomalproteinL13aOS=HomosapiensGN=RPL13APE=1SV=1;sp|P40429|RL13A_HUMAN60SribosomalproteinL13aOS=HomosapiensGN=RPL13APE=1SV=2	1;1;1	1;1;1	1;1;1	;;	3	1	1	1	0	0	0	0	0	1	0	0	1	1	0	0	0	0	0	0	0	0	0	0	0	0	0	0	0	0	1	0	0	1	1	0	0	0	0	0	0	0	0	0
tr|G8JLH9|G8JLH9_HUMANSignaltransducerandactivatoroftranscriptionOS=HomosapiensGN=STAT3PE=1SV=1;sp|P40763|STAT3_HUMANSignaltransducerandactivatoroftranscription3OS=HomosapiensGN=STAT3PE=1SV=2	tr|G8JLH9|G8JLH9_HUMANSignaltransducerandactivatoroftranscriptionOS=HomosapiensGN=STAT3PE=1SV=1;sp|P40763|STAT3_HUMANSignaltransducerandactivatoroftranscription3OS=HomosapiensGN=STAT3PE=1SV=2	3;3	3;3	3;3	;	2	3	3	3	1	0	0	0	0	0	0	0	1	0	1	2	0	2	0	0	0	0	0	0	1	1	0	0	0	0	0	0	0	1	0	1	2	0	2	0	0	0	0	0
sp|P40925|MDHC_HUMANMalatedehydrogenase,cytoplasmicOS=HomosapiensGN=MDH1PE=1SV=4;tr|B9A041|B9A041_HUMANMalatedehydrogenase,cytoplasmicOS=HomosapiensGN=MDH1PE=1SV=1;tr|B8ZZ51|B8ZZ51_HUMANMalatedehydrogenase,cytoplasmicOS=HomosapiensGN=MDH1PE=1SV=1;tr|C9JF79|C9JF79_HUMANMalatedehydrogenase(Fragment)OS=HomosapiensGN=MDH1PE=1SV=1;tr|C9JRL4|C9JRL4_HUMANMalatedehydrogenase,cytoplasmic(Fragment)OS=Homos…	sp|P40925|MDHC_HUMANMalatedehydrogenase,cytoplasmicOS=HomosapiensGN=MDH1PE=1SV=4;tr|B9A041|B9A041_HUMANMalatedehydrogenase,cytoplasmicOS=HomosapiensGN=MDH1PE=1SV=1;tr|B8ZZ51|B8ZZ51_HUMANMalatedehydrogenase,cytoplasmicOS=HomosapiensGN=MDH1PE=1SV=1;tr|C9JF79|C9JF79_HUMANMalatedehydrogenase(Fragment)OS=HomosapiensGN=MDH1PE=1SV=1	11;10;7;6;4	11;10;7;6;4	11;10;7;6;4	;;;	5	11	11	11	7	3	4	3	1	9	7	0	9	6	4	4	3	5	1	3	0	0	1	1	0	7	3	4	3	1	9	7	0	9	6	4	4	3	5	1	3	0	0	1
sp|P40939|ECHA_HUMANTrifunctionalenzymesubunitalpha,mitochondrialOS=HomosapiensGN=HADHAPE=1SV=2;tr|H0YFD6|H0YFD6_HUMANTrifunctionalenzymesubunitalpha,mitochondrial(Fragment)OS=HomosapiensGN=HADHAPE=1SV=1	sp|P40939|ECHA_HUMANTrifunctionalenzymesubunitalpha,mitochondrialOS=HomosapiensGN=HADHAPE=1SV=2	3;1	3;1	3;1		2	3	3	3	0	1	1	0	0	0	0	0	0	0	2	2	0	3	1	0	0	0	0	1	1	0	1	1	0	0	0	0	0	0	0	2	2	0	3	1	0	0	0	0
sp|P41218|MNDA_HUMANMyeloidcellnucleardifferentiationantigenOS=HomosapiensGN=MNDAPE=1SV=1;tr|H0Y6P3|H0Y6P3_HUMANMyeloidcellnucleardifferentiationantigen(Fragment)OS=HomosapiensGN=MNDAPE=1SV=1	sp|P41218|MNDA_HUMANMyeloidcellnucleardifferentiationantigenOS=HomosapiensGN=MNDAPE=1SV=1	6;1	6;1	6;1		2	6	6	6	5	2	4	3	1	2	1	0	3	1	2	1	1	1	0	0	0	0	0	0	0	5	2	4	3	1	2	1	0	3	1	2	1	1	1	0	0	0	0	0
tr|A0A1B0GVS3|A0A1B0GVS3_HUMANAlpha-centractinOS=HomosapiensGN=ACTR1APE=1SV=1;tr|R4GMT0|R4GMT0_HUMANAlpha-centractinOS=HomosapiensGN=ACTR1APE=1SV=1;sp|P61163|ACTZ_HUMANAlpha-centractinOS=HomosapiensGN=ACTR1APE=1SV=1;sp|P42025|ACTY_HUMANBeta-centractinOS=HomosapiensGN=ACTR1BPE=1SV=1	tr|A0A1B0GVS3|A0A1B0GVS3_HUMANAlpha-centractinOS=HomosapiensGN=ACTR1APE=1SV=1;tr|R4GMT0|R4GMT0_HUMANAlpha-centractinOS=HomosapiensGN=ACTR1APE=1SV=1;sp|P61163|ACTZ_HUMANAlpha-centractinOS=HomosapiensGN=ACTR1APE=1SV=1;sp|P42025|ACTY_HUMANBeta-centractinOS=HomosapiensGN=ACTR1BPE=1SV=1	1;1;1;1	1;1;1;1	1;1;1;1	;;;	4	1	1	1	0	0	0	1	0	1	1	0	1	0	0	0	0	0	0	0	0	0	0	0	0	0	0	0	1	0	1	1	0	1	0	0	0	0	0	0	0	0	0	0
sp|P42224|STAT1_HUMANSignaltransducerandactivatoroftranscription1-alpha/betaOS=HomosapiensGN=STAT1PE=1SV=2;tr|J3KPM9|J3KPM9_HUMANSignaltransducerandactivatoroftranscriptionOS=HomosapiensGN=STAT1PE=1SV=1;tr|E7EPD2|E7EPD2_HUMANSignaltransducerandactivatoroftranscription1-alpha/beta(Fragment)OS=HomosapiensGN=STAT1PE=1SV=1;tr|D2KFR9|D2KFR9_HUMANSignaltransducerandactivatoroftranscription1-alpha/betaO…	sp|P42224|STAT1_HUMANSignaltransducerandactivatoroftranscription1-alpha/betaOS=HomosapiensGN=STAT1PE=1SV=2;tr|J3KPM9|J3KPM9_HUMANSignaltransducerandactivatoroftranscriptionOS=HomosapiensGN=STAT1PE=1SV=1	9;8;3;3;2;1;1	9;8;3;3;2;1;1	9;8;3;3;2;1;1	;	7	9	9	9	3	1	2	2	2	6	3	0	7	0	4	5	1	7	1	0	0	0	0	0	0	3	1	2	2	2	6	3	0	7	0	4	5	1	7	1	0	0	0	0
tr|Q5T4L4|Q5T4L4_HUMAN40SribosomalproteinS27OS=HomosapiensGN=RPS27PE=1SV=1;sp|P42677|RS27_HUMAN40SribosomalproteinS27OS=HomosapiensGN=RPS27PE=1SV=3	tr|Q5T4L4|Q5T4L4_HUMAN40SribosomalproteinS27OS=HomosapiensGN=RPS27PE=1SV=1;sp|P42677|RS27_HUMAN40SribosomalproteinS27OS=HomosapiensGN=RPS27PE=1SV=3	1;1	1;1	1;1	;	2	1	1	1	0	0	0	0	0	0	0	0	0	0	0	1	1	1	1	0	0	0	0	0	0	0	0	0	0	0	0	0	0	0	0	0	1	1	1	1	0	0	0	0
tr|K7EME0|K7EME0_HUMAN3-ketoacyl-CoAthiolase,mitochondrialOS=HomosapiensGN=ACAA2PE=1SV=1;tr|A0A0B4J2A4|A0A0B4J2A4_HUMAN3-ketoacyl-CoAthiolase,mitochondrialOS=HomosapiensGN=ACAA2PE=1SV=1;sp|P42765|THIM_HUMAN3-ketoacyl-CoAthiolase,mitochondrialOS=HomosapiensGN=ACAA2PE=1SV=2	tr|K7EME0|K7EME0_HUMAN3-ketoacyl-CoAthiolase,mitochondrialOS=HomosapiensGN=ACAA2PE=1SV=1;tr|A0A0B4J2A4|A0A0B4J2A4_HUMAN3-ketoacyl-CoAthiolase,mitochondrialOS=HomosapiensGN=ACAA2PE=1SV=1;sp|P42765|THIM_HUMAN3-ketoacyl-CoAthiolase,mitochondrialOS=HomosapiensGN=ACAA2PE=1SV=2	1;1;1	1;1;1	1;1;1	;;	3	1	1	1	0	0	0	0	0	0	0	0	0	0	1	1	1	1	0	1	0	0	0	0	0	0	0	0	0	0	0	0	0	0	0	1	1	1	1	0	1	0	0	0
sp|P43034|LIS1_HUMANPlatelet-activatingfactoracetylhydrolaseIBsubunitalphaOS=HomosapiensGN=PAFAH1B1PE=1SV=2;tr|I3L3N5|I3L3N5_HUMANPlatelet-activatingfactoracetylhydrolaseIBsubunitalpha(Fragment)OS=HomosapiensGN=PAFAH1B1PE=1SV=1	sp|P43034|LIS1_HUMANPlatelet-activatingfactoracetylhydrolaseIBsubunitalphaOS=HomosapiensGN=PAFAH1B1PE=1SV=2;tr|I3L3N5|I3L3N5_HUMANPlatelet-activatingfactoracetylhydrolaseIBsubunitalpha(Fragment)OS=HomosapiensGN=PAFAH1B1PE=1SV=1	5;3	5;3	5;3	;	2	5	5	5	1	2	1	1	0	3	0	0	4	0	3	3	1	3	0	0	0	0	0	1	0	1	2	1	1	0	3	0	0	4	0	3	3	1	3	0	0	0	0	0
sp|P43353|AL3B1_HUMANAldehydedehydrogenasefamily3memberB1OS=HomosapiensGN=ALDH3B1PE=1SV=1;tr|A0A087X2D4|A0A087X2D4_HUMANAldehydedehydrogenasefamily3memberB1OS=HomosapiensGN=ALDH3B1PE=1SV=1;tr|Q9BUJ8|Q9BUJ8_HUMANALDH3B1proteinOS=HomosapiensGN=ALDH3B1PE=1SV=1;tr|A0A087WUF8|A0A087WUF8_HUMANAldehydedehydrogenasefamily3memberB1OS=HomosapiensGN=ALDH3B1PE=1SV=1;tr|A0A087X192|A0A087X192_HUMANAldehydedehy…	sp|P43353|AL3B1_HUMANAldehydedehydrogenasefamily3memberB1OS=HomosapiensGN=ALDH3B1PE=1SV=1;tr|A0A087X2D4|A0A087X2D4_HUMANAldehydedehydrogenasefamily3memberB1OS=HomosapiensGN=ALDH3B1PE=1SV=1;tr|Q9BUJ8|Q9BUJ8_HUMANALDH3B1proteinOS=HomosapiensGN=ALDH3B1PE=1SV=1	22;15;11;8;6;2;2	22;15;11;8;6;2;2	22;15;11;8;6;2;2	;;	7	22	22	22	10	6	13	13	4	13	9	0	9	9	4	9	4	8	2	9	5	3	1	1	0	10	6	13	13	4	13	9	0	9	9	4	9	4	8	2	9	5	3	1
sp|P43490|NAMPT_HUMANNicotinamidephosphoribosyltransferaseOS=HomosapiensGN=NAMPTPE=1SV=1;tr|A0A0C4DFS8|A0A0C4DFS8_HUMANNicotinamidephosphoribosyltransferaseOS=HomosapiensGN=NAMPTPE=1SV=1;tr|C9JF35|C9JF35_HUMANNicotinamidephosphoribosyltransferase(Fragment)OS=HomosapiensGN=NAMPTPE=1SV=1;tr|C9JG65|C9JG65_HUMANNicotinamidephosphoribosyltransferase(Fragment)OS=HomosapiensGN=NAMPTPE=1SV=1	sp|P43490|NAMPT_HUMANNicotinamidephosphoribosyltransferaseOS=HomosapiensGN=NAMPTPE=1SV=1;tr|A0A0C4DFS8|A0A0C4DFS8_HUMANNicotinamidephosphoribosyltransferaseOS=HomosapiensGN=NAMPTPE=1SV=1	9;6;1;1	9;6;1;1	9;6;1;1	;	4	9	9	9	6	5	6	6	2	7	5	0	5	2	2	2	0	2	0	1	0	0	0	0	1	6	5	6	6	2	7	5	0	5	2	2	2	0	2	0	1	0	0	0
sp|P43652|AFAM_HUMANAfaminOS=HomosapiensGN=AFMPE=1SV=1	sp|P43652|AFAM_HUMANAfaminOS=HomosapiensGN=AFMPE=1SV=1	3	3	3		1	3	3	3	0	0	0	0	0	0	0	0	0	0	0	0	3	0	0	0	0	0	0	0	0	0	0	0	0	0	0	0	0	0	0	0	0	3	0	0	0	0	0	0
sp|P43686|PRS6B_HUMAN26Sproteasomeregulatorysubunit6BOS=HomosapiensGN=PSMC4PE=1SV=2	sp|P43686|PRS6B_HUMAN26Sproteasomeregulatorysubunit6BOS=HomosapiensGN=PSMC4PE=1SV=2	2	2	2		1	2	2	2	0	0	0	0	0	1	1	0	2	0	1	1	0	0	0	1	0	0	0	0	0	0	0	0	0	0	1	1	0	2	0	1	1	0	0	0	1	0	0	0
tr|F5H2L2|F5H2L2_HUMANATP-dependentDNAhelicaseQ1(Fragment)OS=HomosapiensGN=RECQLPE=1SV=1;tr|F8WA66|F8WA66_HUMANATP-dependentDNAhelicaseQ1(Fragment)OS=HomosapiensGN=RECQLPE=1SV=1;tr|F8WD97|F8WD97_HUMANATP-dependentDNAhelicaseQ1(Fragment)OS=HomosapiensGN=RECQLPE=1SV=1;sp|P46063|RECQ1_HUMANATP-dependentDNAhelicaseQ1OS=HomosapiensGN=RECQLPE=1SV=3	tr|F5H2L2|F5H2L2_HUMANATP-dependentDNAhelicaseQ1(Fragment)OS=HomosapiensGN=RECQLPE=1SV=1;tr|F8WA66|F8WA66_HUMANATP-dependentDNAhelicaseQ1(Fragment)OS=HomosapiensGN=RECQLPE=1SV=1;tr|F8WD97|F8WD97_HUMANATP-dependentDNAhelicaseQ1(Fragment)OS=HomosapiensGN=RECQLPE=1SV=1;sp|P46063|RECQ1_HUMANATP-dependentDNAhelicaseQ1OS=HomosapiensGN=RECQLPE=1SV=3	1;1;1;1	1;1;1;1	1;1;1;1	;;;	4	1	1	1	0	0	0	0	0	0	0	0	0	0	0	0	0	1	0	0	0	0	0	0	0	0	0	0	0	0	0	0	0	0	0	0	0	0	1	0	0	0	0	0
tr|A0A096LNW1|A0A096LNW1_HUMANTranscriptionalregulatorATRX(Fragment)OS=HomosapiensGN=ATRXPE=1SV=1;tr|A0A096LNL9|A0A096LNL9_HUMANTranscriptionalregulatorATRX(Fragment)OS=HomosapiensGN=ATRXPE=1SV=1;sp|P46100|ATRX_HUMANTranscriptionalregulatorATRXOS=HomosapiensGN=ATRXPE=1SV=5	tr|A0A096LNW1|A0A096LNW1_HUMANTranscriptionalregulatorATRX(Fragment)OS=HomosapiensGN=ATRXPE=1SV=1;tr|A0A096LNL9|A0A096LNL9_HUMANTranscriptionalregulatorATRX(Fragment)OS=HomosapiensGN=ATRXPE=1SV=1;sp|P46100|ATRX_HUMANTranscriptionalregulatorATRXOS=HomosapiensGN=ATRXPE=1SV=5	1;1;1	1;1;1	1;1;1	;;	3	1	1	1	0	0	0	0	0	0	0	0	0	0	0	0	0	0	0	0	0	1	1	0	0	0	0	0	0	0	0	0	0	0	0	0	0	0	0	0	0	0	1	1
tr|I3L0N3|I3L0N3_HUMANVesicle-fusingATPaseOS=HomosapiensGN=NSFPE=1SV=1;sp|P46459|NSF_HUMANVesicle-fusingATPaseOS=HomosapiensGN=NSFPE=1SV=3;tr|I3L0L3|I3L0L3_HUMANVesicle-fusingATPase(Fragment)OS=HomosapiensGN=NSFPE=1SV=1;tr|I3L338|I3L338_HUMANVesicle-fusingATPase(Fragment)OS=HomosapiensGN=NSFPE=1SV=1;tr|I3L4Q9|I3L4Q9_HUMANVesicle-fusingATPaseOS=HomosapiensGN=NSFPE=1SV=1;tr|I3L2G1|I3L2G1_HUMANVesic…	tr|I3L0N3|I3L0N3_HUMANVesicle-fusingATPaseOS=HomosapiensGN=NSFPE=1SV=1;sp|P46459|NSF_HUMANVesicle-fusingATPaseOS=HomosapiensGN=NSFPE=1SV=3;tr|I3L0L3|I3L0L3_HUMANVesicle-fusingATPase(Fragment)OS=HomosapiensGN=NSFPE=1SV=1	4;4;2;1;1;1;1	4;4;2;1;1;1;1	4;4;2;1;1;1;1	;;	7	4	4	4	2	0	0	0	0	2	1	0	2	1	2	1	0	3	0	0	0	0	0	0	0	2	0	0	0	0	2	1	0	2	1	2	1	0	3	0	0	0	0	0
tr|E9PJD9|E9PJD9_HUMAN60SribosomalproteinL27aOS=HomosapiensGN=RPL27APE=1SV=1;tr|E9PLL6|E9PLL6_HUMAN60SribosomalproteinL27aOS=HomosapiensGN=RPL27APE=1SV=1;sp|P46776|RL27A_HUMAN60SribosomalproteinL27aOS=HomosapiensGN=RPL27APE=1SV=2;tr|E9PLX7|E9PLX7_HUMAN60SribosomalproteinL27aOS=HomosapiensGN=RPL27APE=1SV=1	tr|E9PJD9|E9PJD9_HUMAN60SribosomalproteinL27aOS=HomosapiensGN=RPL27APE=1SV=1;tr|E9PLL6|E9PLL6_HUMAN60SribosomalproteinL27aOS=HomosapiensGN=RPL27APE=1SV=1;sp|P46776|RL27A_HUMAN60SribosomalproteinL27aOS=HomosapiensGN=RPL27APE=1SV=2;tr|E9PLX7|E9PLX7_HUMAN60SribosomalproteinL27aOS=HomosapiensGN=RPL27APE=1SV=1	2;2;2;1	2;2;2;1	2;2;2;1	;;;	4	2	2	2	1	0	0	0	0	1	1	0	0	0	0	0	1	1	0	0	0	0	0	0	0	1	0	0	0	0	1	1	0	0	0	0	0	1	1	0	0	0	0	0
sp|P46777|RL5_HUMAN60SribosomalproteinL5OS=HomosapiensGN=RPL5PE=1SV=3;tr|Q5T7N0|Q5T7N0_HUMAN60SribosomalproteinL5(Fragment)OS=HomosapiensGN=RPL5PE=1SV=2	sp|P46777|RL5_HUMAN60SribosomalproteinL5OS=HomosapiensGN=RPL5PE=1SV=3	3;1	3;1	3;1		2	3	3	3	3	2	1	1	0	0	0	0	0	0	1	0	2	1	0	0	0	0	0	0	0	3	2	1	1	0	0	0	0	0	0	1	0	2	1	0	0	0	0	0
tr|B5MCT8|B5MCT8_HUMAN40SribosomalproteinS9OS=HomosapiensGN=RPS9PE=1SV=1;tr|C9JM19|C9JM19_HUMAN40SribosomalproteinS9OS=HomosapiensGN=RPS9PE=1SV=1;tr|A0A024R4M0|A0A024R4M0_HUMAN40SribosomalproteinS9OS=HomosapiensGN=RPS9PE=1SV=1;sp|P46781|RS9_HUMAN40SribosomalproteinS9OS=HomosapiensGN=RPS9PE=1SV=3;tr|F2Z3C0|F2Z3C0_HUMAN40SribosomalproteinS9OS=HomosapiensGN=RPS9PE=1SV=1;tr|A8MXK4|A8MXK4_HUMAN40Sribo…	tr|B5MCT8|B5MCT8_HUMAN40SribosomalproteinS9OS=HomosapiensGN=RPS9PE=1SV=1;tr|C9JM19|C9JM19_HUMAN40SribosomalproteinS9OS=HomosapiensGN=RPS9PE=1SV=1;tr|A0A024R4M0|A0A024R4M0_HUMAN40SribosomalproteinS9OS=HomosapiensGN=RPS9PE=1SV=1;sp|P46781|RS9_HUMAN40SribosomalproteinS9OS=HomosapiensGN=RPS9PE=1SV=3	6;6;6;6;2;2	6;6;6;6;2;2	6;6;6;6;2;2	;;;	6	6	6	6	2	2	4	4	0	2	1	0	2	2	2	1	1	2	1	1	0	0	1	0	1	2	2	4	4	0	2	1	0	2	2	2	1	1	2	1	1	0	0	1
tr|M0QZN2|M0QZN2_HUMAN40SribosomalproteinS5OS=HomosapiensGN=RPS5PE=1SV=1;tr|M0R0F0|M0R0F0_HUMAN40SribosomalproteinS5(Fragment)OS=HomosapiensGN=RPS5PE=1SV=1;sp|P46782|RS5_HUMAN40SribosomalproteinS5OS=HomosapiensGN=RPS5PE=1SV=4;tr|M0R0R2|M0R0R2_HUMAN40SribosomalproteinS5OS=HomosapiensGN=RPS5PE=1SV=1	tr|M0QZN2|M0QZN2_HUMAN40SribosomalproteinS5OS=HomosapiensGN=RPS5PE=1SV=1;tr|M0R0F0|M0R0F0_HUMAN40SribosomalproteinS5(Fragment)OS=HomosapiensGN=RPS5PE=1SV=1;sp|P46782|RS5_HUMAN40SribosomalproteinS5OS=HomosapiensGN=RPS5PE=1SV=4;tr|M0R0R2|M0R0R2_HUMAN40SribosomalproteinS5OS=HomosapiensGN=RPS5PE=1SV=1	2;2;2;2	2;2;2;2	2;2;2;2	;;;	4	2	2	2	1	1	1	0	0	0	0	0	0	0	0	0	0	1	0	0	0	0	0	0	0	1	1	1	0	0	0	0	0	0	0	0	0	0	1	0	0	0	0	0
sp|P46940|IQGA1_HUMANRasGTPase-activating-likeproteinIQGAP1OS=HomosapiensGN=IQGAP1PE=1SV=1;tr|A0A0J9YXZ5|A0A0J9YXZ5_HUMANRasGTPase-activating-likeproteinIQGAP1OS=HomosapiensGN=IQGAP1PE=1SV=1;tr|H0YLE8|H0YLE8_HUMANRasGTPase-activating-likeproteinIQGAP1OS=HomosapiensGN=IQGAP1PE=1SV=1;tr|H0YKA5|H0YKA5_HUMANRasGTPase-activating-likeproteinIQGAP1(Fragment)OS=HomosapiensGN=IQGAP1PE=1SV=1;tr|A0A087WWP1|…	sp|P46940|IQGA1_HUMANRasGTPase-activating-likeproteinIQGAP1OS=HomosapiensGN=IQGAP1PE=1SV=1;tr|A0A0J9YXZ5|A0A0J9YXZ5_HUMANRasGTPase-activating-likeproteinIQGAP1OS=HomosapiensGN=IQGAP1PE=1SV=1;tr|H0YLE8|H0YLE8_HUMANRasGTPase-activating-likeproteinIQGAP1OS=HomosapiensGN=IQGAP1PE=1SV=1	37;28;26;2;2;1;1;1;1	37;28;26;2;2;1;1;1;1	35;26;24;2;2;1;0;0;0	;;	9	37	37	35	19	9	13	14	3	27	16	0	21	10	13	15	4	19	3	8	3	1	1	3	1	19	9	13	14	3	27	16	0	21	10	13	15	4	19	3	8	3	1	1
sp|P46977|STT3A_HUMANDolichyl-diphosphooligosaccharide--proteinglycosyltransferasesubunitSTT3AOS=HomosapiensGN=STT3APE=1SV=2;tr|H0YET6|H0YET6_HUMANDolichyl-diphosphooligosaccharide--proteinglycosyltransferasesubunitSTT3A(Fragment)OS=HomosapiensGN=STT3APE=1SV=1	sp|P46977|STT3A_HUMANDolichyl-diphosphooligosaccharide--proteinglycosyltransferasesubunitSTT3AOS=HomosapiensGN=STT3APE=1SV=2;tr|H0YET6|H0YET6_HUMANDolichyl-diphosphooligosaccharide--proteinglycosyltransferasesubunitSTT3A(Fragment)OS=HomosapiensGN=STT3APE=1SV=1	2;1	2;1	2;1	;	2	2	2	2	0	0	0	0	0	0	0	0	0	0	2	2	0	2	1	1	0	0	0	1	0	0	0	0	0	0	0	0	0	0	0	2	2	0	2	1	1	0	0	0
sp|P47755|CAZA2_HUMANF-actin-cappingproteinsubunitalpha-2OS=HomosapiensGN=CAPZA2PE=1SV=3;tr|C9JUG7|C9JUG7_HUMANF-actin-cappingproteinsubunitalpha-2OS=HomosapiensGN=CAPZA2PE=1SV=1;tr|F8W9N7|F8W9N7_HUMANF-actin-cappingproteinsubunitalpha-2OS=HomosapiensGN=CAPZA2PE=1SV=1;tr|A0A0D9SET8|A0A0D9SET8_HUMANF-actin-cappingproteinsubunitalpha-2OS=HomosapiensGN=CAPZA2PE=1SV=1	sp|P47755|CAZA2_HUMANF-actin-cappingproteinsubunitalpha-2OS=HomosapiensGN=CAPZA2PE=1SV=3;tr|C9JUG7|C9JUG7_HUMANF-actin-cappingproteinsubunitalpha-2OS=HomosapiensGN=CAPZA2PE=1SV=1;tr|F8W9N7|F8W9N7_HUMANF-actin-cappingproteinsubunitalpha-2OS=HomosapiensGN=CAPZA2PE=1SV=1	5;3;3;2	3;2;2;1	3;2;2;1	;;	4	5	3	3	1	0	2	1	0	4	4	0	2	1	1	1	1	1	0	1	1	0	1	0	0	1	0	1	0	0	2	2	0	2	1	1	1	1	1	0	0	0	0	1
sp|P47756|CAPZB_HUMANF-actin-cappingproteinsubunitbetaOS=HomosapiensGN=CAPZBPE=1SV=4;tr|B1AK87|B1AK87_HUMANCappingprotein(Actinfilament)muscleZ-line,beta,isoformCRA_aOS=HomosapiensGN=CAPZBPE=1SV=1;tr|B1AK88|B1AK88_HUMANCappingprotein(Actinfilament)muscleZ-line,beta,isoformCRA_dOS=HomosapiensGN=CAPZBPE=1SV=1;tr|B1AK85|B1AK85_HUMANF-actin-cappingproteinsubunitbetaOS=HomosapiensGN=CAPZBPE=1SV=1	sp|P47756|CAPZB_HUMANF-actin-cappingproteinsubunitbetaOS=HomosapiensGN=CAPZBPE=1SV=4;tr|B1AK87|B1AK87_HUMANCappingprotein(Actinfilament)muscleZ-line,beta,isoformCRA_aOS=HomosapiensGN=CAPZBPE=1SV=1;tr|B1AK88|B1AK88_HUMANCappingprotein(Actinfilament)muscleZ-line,beta,isoformCRA_dOS=HomosapiensGN=CAPZBPE=1SV=1;tr|B1AK85|B1AK85_HUMANF-actin-cappingproteinsubunitbetaOS=HomosapiensGN=CAPZBPE=1SV=1	8;7;7;6	8;7;7;6	8;7;7;6	;;;	4	8	8	8	5	3	4	3	0	5	2	0	6	2	2	4	1	4	0	2	2	0	0	0	0	5	3	4	3	0	5	2	0	6	2	2	4	1	4	0	2	2	0	0
sp|P48047|ATPO_HUMANATPsynthasesubunitO,mitochondrialOS=HomosapiensGN=ATP5OPE=1SV=1	sp|P48047|ATPO_HUMANATPsynthasesubunitO,mitochondrialOS=HomosapiensGN=ATP5OPE=1SV=1	1	1	1		1	1	1	1	0	0	0	0	0	0	0	0	0	0	0	1	0	1	0	0	0	0	0	0	0	0	0	0	0	0	0	0	0	0	0	0	1	0	1	0	0	0	0	0
sp|P48444|COPD_HUMANCoatomersubunitdeltaOS=HomosapiensGN=ARCN1PE=1SV=1;tr|B0YIW6|B0YIW6_HUMANArchain1,isoformCRA_aOS=HomosapiensGN=ARCN1PE=1SV=1;tr|Q6P1Q5|Q6P1Q5_HUMANCoatomersubunitdeltaOS=HomosapiensGN=ARCN1PE=1SV=1	sp|P48444|COPD_HUMANCoatomersubunitdeltaOS=HomosapiensGN=ARCN1PE=1SV=1;tr|B0YIW6|B0YIW6_HUMANArchain1,isoformCRA_aOS=HomosapiensGN=ARCN1PE=1SV=1;tr|Q6P1Q5|Q6P1Q5_HUMANCoatomersubunitdeltaOS=HomosapiensGN=ARCN1PE=1SV=1	2;2;1	2;2;1	2;2;1	;;	3	2	2	2	1	1	1	1	0	1	0	0	0	0	1	1	0	1	0	0	0	0	0	0	0	1	1	1	1	0	1	0	0	0	0	1	1	0	1	0	0	0	0	0
tr|A0A0C4DGB2|A0A0C4DGB2_HUMANGlutamate--cysteineligasecatalyticsubunitOS=HomosapiensGN=GCLCPE=1SV=1;sp|P48506|GSH1_HUMANGlutamate--cysteineligasecatalyticsubunitOS=HomosapiensGN=GCLCPE=1SV=2;tr|D6R959|D6R959_HUMANGlutamate--cysteineligasecatalyticsubunit(Fragment)OS=HomosapiensGN=GCLCPE=1SV=1;tr|H0Y9I7|H0Y9I7_HUMANGlutamate--cysteineligasecatalyticsubunit(Fragment)OS=HomosapiensGN=GCLCPE=1SV=1;t…	tr|A0A0C4DGB2|A0A0C4DGB2_HUMANGlutamate--cysteineligasecatalyticsubunitOS=HomosapiensGN=GCLCPE=1SV=1;sp|P48506|GSH1_HUMANGlutamate--cysteineligasecatalyticsubunitOS=HomosapiensGN=GCLCPE=1SV=2;tr|D6R959|D6R959_HUMANGlutamate--cysteineligasecatalyticsubunit(Fragment)OS=HomosapiensGN=GCLCPE=1SV=1;tr|H0Y9I7|H0Y9I7_HUMANGlutamate--cysteineligasecatalyticsubunit(Fragment)OS=HomosapiensGN=GCLCPE=1SV=1;t…	2;2;1;1;1	2;2;1;1;1	2;2;1;1;1	;;;;	5	2	2	2	0	1	0	0	0	2	1	0	1	0	0	0	0	0	0	0	0	0	0	0	0	0	1	0	0	0	2	1	0	1	0	0	0	0	0	0	0	0	0	0
tr|E7ENZ3|E7ENZ3_HUMANT-complexprotein1subunitepsilonOS=HomosapiensGN=CCT5PE=1SV=1;tr|B7ZAR1|B7ZAR1_HUMANT-complexprotein1subunitepsilonOS=HomosapiensGN=CCT5PE=1SV=1;tr|E9PCA1|E9PCA1_HUMANT-complexprotein1subunitepsilonOS=HomosapiensGN=CCT5PE=1SV=1;sp|P48643|TCPE_HUMANT-complexprotein1subunitepsilonOS=HomosapiensGN=CCT5PE=1SV=1	tr|E7ENZ3|E7ENZ3_HUMANT-complexprotein1subunitepsilonOS=HomosapiensGN=CCT5PE=1SV=1;tr|B7ZAR1|B7ZAR1_HUMANT-complexprotein1subunitepsilonOS=HomosapiensGN=CCT5PE=1SV=1;tr|E9PCA1|E9PCA1_HUMANT-complexprotein1subunitepsilonOS=HomosapiensGN=CCT5PE=1SV=1;sp|P48643|TCPE_HUMANT-complexprotein1subunitepsilonOS=HomosapiensGN=CCT5PE=1SV=1	2;2;2;2	2;2;2;2	2;2;2;2	;;;	4	2	2	2	1	0	0	0	0	1	2	0	1	0	1	1	1	1	0	0	0	0	0	0	0	1	0	0	0	0	1	2	0	1	0	1	1	1	1	0	0	0	0	0
sp|P48735|IDHP_HUMANIsocitratedehydrogenase[NADP],mitochondrialOS=HomosapiensGN=IDH2PE=1SV=2;tr|H0YL11|H0YL11_HUMANIsocitratedehydrogenase[NADP],mitochondrialOS=HomosapiensGN=IDH2PE=1SV=1	sp|P48735|IDHP_HUMANIsocitratedehydrogenase[NADP],mitochondrialOS=HomosapiensGN=IDH2PE=1SV=2;tr|H0YL11|H0YL11_HUMANIsocitratedehydrogenase[NADP],mitochondrialOS=HomosapiensGN=IDH2PE=1SV=1	2;1	1;1	1;1	;	2	2	1	1	2	0	0	0	0	0	0	0	1	0	1	1	0	1	0	0	0	0	0	0	1	1	0	0	0	0	0	0	0	0	0	1	1	0	1	0	0	0	0	0
tr|F8W876|F8W876_HUMANMannan-bindinglectinserineprotease1OS=HomosapiensGN=MASP1PE=1SV=1;sp|P48740|MASP1_HUMANMannan-bindinglectinserineprotease1OS=HomosapiensGN=MASP1PE=1SV=3	tr|F8W876|F8W876_HUMANMannan-bindinglectinserineprotease1OS=HomosapiensGN=MASP1PE=1SV=1;sp|P48740|MASP1_HUMANMannan-bindinglectinserineprotease1OS=HomosapiensGN=MASP1PE=1SV=3	2;2	1;1	1;1	;	2	2	1	1	0	0	0	0	0	0	0	0	0	0	0	0	2	0	0	0	0	0	0	0	0	0	0	0	0	0	0	0	0	0	0	0	0	1	0	0	0	0	0	0
sp|P49189|AL9A1_HUMAN4-trimethylaminobutyraldehydedehydrogenaseOS=HomosapiensGN=ALDH9A1PE=1SV=3	sp|P49189|AL9A1_HUMAN4-trimethylaminobutyraldehydedehydrogenaseOS=HomosapiensGN=ALDH9A1PE=1SV=3	2	2	2		1	2	2	2	0	0	0	0	0	1	0	0	0	0	0	0	0	1	0	1	1	0	0	0	0	0	0	0	0	0	1	0	0	0	0	0	0	0	1	0	1	1	0	0
sp|P49257|LMAN1_HUMANProteinERGIC-53OS=HomosapiensGN=LMAN1PE=1SV=2	sp|P49257|LMAN1_HUMANProteinERGIC-53OS=HomosapiensGN=LMAN1PE=1SV=2	3	3	3		1	3	3	3	0	0	0	0	0	0	0	0	0	0	2	2	0	3	0	0	0	0	0	0	0	0	0	0	0	0	0	0	0	0	0	2	2	0	3	0	0	0	0	0
tr|A0A0U1RQF0|A0A0U1RQF0_HUMANFattyacidsynthaseOS=HomosapiensGN=FASNPE=1SV=1;sp|P49327|FAS_HUMANFattyacidsynthaseOS=HomosapiensGN=FASNPE=1SV=3	tr|A0A0U1RQF0|A0A0U1RQF0_HUMANFattyacidsynthaseOS=HomosapiensGN=FASNPE=1SV=1;sp|P49327|FAS_HUMANFattyacidsynthaseOS=HomosapiensGN=FASNPE=1SV=3	1;1	1;1	1;1	;	2	1	1	1	1	1	0	0	0	1	1	0	1	0	0	0	0	0	0	0	0	0	0	0	0	1	1	0	0	0	1	1	0	1	0	0	0	0	0	0	0	0	0	0
tr|B4DUR8|B4DUR8_HUMANT-complexprotein1subunitgammaOS=HomosapiensGN=CCT3PE=1SV=1;sp|P49368|TCPG_HUMANT-complexprotein1subunitgammaOS=HomosapiensGN=CCT3PE=1SV=4;tr|E9PRC8|E9PRC8_HUMANT-complexprotein1subunitgamma(Fragment)OS=HomosapiensGN=CCT3PE=1SV=1;tr|Q5SZX6|Q5SZX6_HUMANT-complexprotein1subunitgamma(Fragment)OS=HomosapiensGN=CCT3PE=1SV=1;tr|E9PQ35|E9PQ35_HUMANT-complexprotein1subunitgamma(Fragm…	tr|B4DUR8|B4DUR8_HUMANT-complexprotein1subunitgammaOS=HomosapiensGN=CCT3PE=1SV=1;sp|P49368|TCPG_HUMANT-complexprotein1subunitgammaOS=HomosapiensGN=CCT3PE=1SV=4	13;13;4;4;3;2;2;1	13;13;4;4;3;2;2;1	13;13;4;4;3;2;2;1	;	8	13	13	13	4	2	3	2	0	11	6	0	8	4	3	4	3	6	1	3	2	1	0	1	0	4	2	3	2	0	11	6	0	8	4	3	4	3	6	1	3	2	1	0
tr|E9PM35|E9PM35_HUMANBeta-arrestin-1(Fragment)OS=HomosapiensGN=ARRB1PE=1SV=8;sp|P49407|ARRB1_HUMANBeta-arrestin-1OS=HomosapiensGN=ARRB1PE=1SV=2	tr|E9PM35|E9PM35_HUMANBeta-arrestin-1(Fragment)OS=HomosapiensGN=ARRB1PE=1SV=8;sp|P49407|ARRB1_HUMANBeta-arrestin-1OS=HomosapiensGN=ARRB1PE=1SV=2	1;1	1;1	1;1	;	2	1	1	1	1	0	0	0	0	0	0	0	0	0	1	1	0	1	0	0	0	0	0	0	0	1	0	0	0	0	0	0	0	0	0	1	1	0	1	0	0	0	0	0
sp|P49411|EFTU_HUMANElongationfactorTu,mitochondrialOS=HomosapiensGN=TUFMPE=1SV=2;tr|H3BNU3|H3BNU3_HUMANElongationfactorTu,mitochondrialOS=HomosapiensGN=TUFMPE=1SV=1	sp|P49411|EFTU_HUMANElongationfactorTu,mitochondrialOS=HomosapiensGN=TUFMPE=1SV=2	5;1	5;1	5;1		2	5	5	5	0	0	0	0	0	0	1	0	0	0	2	4	2	5	0	0	0	0	0	0	0	0	0	0	0	0	0	1	0	0	0	2	4	2	5	0	0	0	0	0
tr|A0A087WXQ8|A0A087WXQ8_HUMANProteasomesubunitbetatype-3OS=HomosapiensGN=PSMB3PE=1SV=1;tr|A0A087WY10|A0A087WY10_HUMANProteasomesubunitbetatype-3OS=HomosapiensGN=PSMB3PE=1SV=1;sp|P49720|PSB3_HUMANProteasomesubunitbetatype-3OS=HomosapiensGN=PSMB3PE=1SV=2	tr|A0A087WXQ8|A0A087WXQ8_HUMANProteasomesubunitbetatype-3OS=HomosapiensGN=PSMB3PE=1SV=1;tr|A0A087WY10|A0A087WY10_HUMANProteasomesubunitbetatype-3OS=HomosapiensGN=PSMB3PE=1SV=1;sp|P49720|PSB3_HUMANProteasomesubunitbetatype-3OS=HomosapiensGN=PSMB3PE=1SV=2	1;1;1	1;1;1	1;1;1	;;	3	1	1	1	1	0	0	0	0	1	0	0	1	0	0	0	0	0	0	0	0	0	0	0	0	1	0	0	0	0	1	0	0	1	0	0	0	0	0	0	0	0	0	0
tr|A0A087WVV1|A0A087WVV1_HUMANProteasomesubunitbetatype-2OS=HomosapiensGN=PSMB2PE=1SV=1;sp|P49721|PSB2_HUMANProteasomesubunitbetatype-2OS=HomosapiensGN=PSMB2PE=1SV=1	tr|A0A087WVV1|A0A087WVV1_HUMANProteasomesubunitbetatype-2OS=HomosapiensGN=PSMB2PE=1SV=1;sp|P49721|PSB2_HUMANProteasomesubunitbetatype-2OS=HomosapiensGN=PSMB2PE=1SV=1	2;2	2;2	2;2	;	2	2	2	2	0	0	1	0	0	1	0	0	1	0	1	1	1	1	0	0	0	1	1	1	0	0	0	1	0	0	1	0	0	1	0	1	1	1	1	0	0	0	1	1
tr|D6RC06|D6RC06_HUMANHistidinetriadnucleotide-bindingprotein1OS=HomosapiensGN=HINT1PE=1SV=1;tr|D6REP8|D6REP8_HUMANHistidinetriadnucleotide-bindingprotein1OS=HomosapiensGN=HINT1PE=1SV=1;tr|D6RE99|D6RE99_HUMANHistidinetriadnucleotide-bindingprotein1OS=HomosapiensGN=HINT1PE=1SV=1;tr|D6RD60|D6RD60_HUMANHistidinetriadnucleotide-bindingprotein1OS=HomosapiensGN=HINT1PE=1SV=1;sp|P49773|HINT1_HUMANHistid…	tr|D6RC06|D6RC06_HUMANHistidinetriadnucleotide-bindingprotein1OS=HomosapiensGN=HINT1PE=1SV=1;tr|D6REP8|D6REP8_HUMANHistidinetriadnucleotide-bindingprotein1OS=HomosapiensGN=HINT1PE=1SV=1;tr|D6RE99|D6RE99_HUMANHistidinetriadnucleotide-bindingprotein1OS=HomosapiensGN=HINT1PE=1SV=1;tr|D6RD60|D6RD60_HUMANHistidinetriadnucleotide-bindingprotein1OS=HomosapiensGN=HINT1PE=1SV=1;sp|P49773|HINT1_HUMANHistid…	1;1;1;1;1	1;1;1;1;1	1;1;1;1;1	;;;;	5	1	1	1	0	0	0	0	0	1	0	0	1	0	0	0	0	0	0	1	0	0	0	0	0	0	0	0	0	0	1	0	0	1	0	0	0	0	0	0	1	0	0	0
sp|P49788|TIG1_HUMANRetinoicacidreceptorresponderprotein1OS=HomosapiensGN=RARRES1PE=1SV=2	sp|P49788|TIG1_HUMANRetinoicacidreceptorresponderprotein1OS=HomosapiensGN=RARRES1PE=1SV=2	1	1	1		1	1	1	1	1	1	1	1	0	1	0	0	1	0	0	0	0	0	0	0	0	0	0	0	0	1	1	1	1	0	1	0	0	1	0	0	0	0	0	0	0	0	0	0
tr|C9JHQ8|C9JHQ8_HUMANTranscriptioninitiationfactorTFIIDsubunit6(Fragment)OS=HomosapiensGN=TAF6PE=1SV=1;tr|F8WEJ7|F8WEJ7_HUMANTranscriptioninitiationfactorTFIIDsubunit6OS=HomosapiensGN=TAF6PE=1SV=1;tr|C9J7C4|C9J7C4_HUMANTranscriptioninitiationfactorTFIIDsubunit6(Fragment)OS=HomosapiensGN=TAF6PE=1SV=1;tr|C9JIS2|C9JIS2_HUMANTranscriptioninitiationfactorTFIIDsubunit6(Fragment)OS=HomosapiensGN=TAF6PE…	tr|C9JHQ8|C9JHQ8_HUMANTranscriptioninitiationfactorTFIIDsubunit6(Fragment)OS=HomosapiensGN=TAF6PE=1SV=1;tr|F8WEJ7|F8WEJ7_HUMANTranscriptioninitiationfactorTFIIDsubunit6OS=HomosapiensGN=TAF6PE=1SV=1;tr|C9J7C4|C9J7C4_HUMANTranscriptioninitiationfactorTFIIDsubunit6(Fragment)OS=HomosapiensGN=TAF6PE=1SV=1;tr|C9JIS2|C9JIS2_HUMANTranscriptioninitiationfactorTFIIDsubunit6(Fragment)OS=HomosapiensGN=TAF6PE…	1;1;1;1;1;1;1;1;1	1;1;1;1;1;1;1;1;1	1;1;1;1;1;1;1;1;1	;;;;;;;;	9	1	1	1	0	0	0	0	0	0	0	0	0	0	1	1	0	1	0	1	1	0	0	0	0	0	0	0	0	0	0	0	0	0	0	1	1	0	1	0	1	1	0	0
tr|A0A182DWH7|A0A182DWH7_HUMANSelenoproteinP(Fragment)OS=HomosapiensGN=SELENOPPE=1SV=1;sp|P49908|SEPP1_HUMANSelenoproteinPOS=HomosapiensGN=SELENOPPE=1SV=3	tr|A0A182DWH7|A0A182DWH7_HUMANSelenoproteinP(Fragment)OS=HomosapiensGN=SELENOPPE=1SV=1;sp|P49908|SEPP1_HUMANSelenoproteinPOS=HomosapiensGN=SELENOPPE=1SV=3	1;1	1;1	1;1	;	2	1	1	1	0	0	0	0	0	0	0	0	0	0	0	0	1	0	0	0	1	0	0	0	1	0	0	0	0	0	0	0	0	0	0	0	0	1	0	0	0	1	0	0
sp|P49913|CAMP_HUMANCathelicidinantimicrobialpeptideOS=HomosapiensGN=CAMPPE=1SV=1;tr|J3KNB4|J3KNB4_HUMANCathelicidinantimicrobialpeptideOS=HomosapiensGN=CAMPPE=1SV=1	sp|P49913|CAMP_HUMANCathelicidinantimicrobialpeptideOS=HomosapiensGN=CAMPPE=1SV=1;tr|J3KNB4|J3KNB4_HUMANCathelicidinantimicrobialpeptideOS=HomosapiensGN=CAMPPE=1SV=1	7;7	7;7	7;7	;	2	7	7	7	3	3	3	3	1	0	0	0	2	1	4	4	1	3	4	3	0	3	6	6	3	3	3	3	3	1	0	0	0	2	1	4	4	1	3	4	3	0	3	6
sp|P50135|HNMT_HUMANHistamineN-methyltransferaseOS=HomosapiensGN=HNMTPE=1SV=1	sp|P50135|HNMT_HUMANHistamineN-methyltransferaseOS=HomosapiensGN=HNMTPE=1SV=1	4	4	4		1	4	4	4	0	0	0	0	0	3	3	0	2	1	0	1	0	2	0	1	0	0	0	0	0	0	0	0	0	0	3	3	0	2	1	0	1	0	2	0	1	0	0	0
sp|P50151|GBG10_HUMANGuaninenucleotide-bindingproteinG(I)/G(S)/G(O)subunitgamma-10OS=HomosapiensGN=GNG10PE=1SV=1;tr|A0A024R161|A0A024R161_HUMANGuaninenucleotide-bindingproteinsubunitgammaOS=HomosapiensGN=DNAJC25-GNG10PE=3SV=1	sp|P50151|GBG10_HUMANGuaninenucleotide-bindingproteinG(I)/G(S)/G(O)subunitgamma-10OS=HomosapiensGN=GNG10PE=1SV=1;tr|A0A024R161|A0A024R161_HUMANGuaninenucleotide-bindingproteinsubunitgammaOS=HomosapiensGN=DNAJC25-GNG10PE=3SV=1	1;1	1;1	1;1	;	2	1	1	1	1	0	0	0	0	0	0	0	0	0	1	0	0	0	0	1	0	0	0	0	0	1	0	0	0	0	0	0	0	0	0	1	0	0	0	0	1	0	0	0
tr|H3BRY5|H3BRY5_HUMANSulfotransferase(Fragment)OS=HomosapiensGN=SULT1A1PE=1SV=1;sp|P50225|ST1A1_HUMANSulfotransferase1A1OS=HomosapiensGN=SULT1A1PE=1SV=3;tr|H3BQX5|H3BQX5_HUMANSulfotransferase(Fragment)OS=HomosapiensGN=SULT1A1PE=1SV=8;sp|P50226|ST1A2_HUMANSulfotransferase1A2OS=HomosapiensGN=SULT1A2PE=1SV=2;sp|P0DMN0|ST1A4_HUMANSulfotransferase1A4OS=HomosapiensGN=SULT1A4PE=1SV=1;sp|P0DMM9|ST1A3_HU…	tr|H3BRY5|H3BRY5_HUMANSulfotransferase(Fragment)OS=HomosapiensGN=SULT1A1PE=1SV=1;sp|P50225|ST1A1_HUMANSulfotransferase1A1OS=HomosapiensGN=SULT1A1PE=1SV=3;tr|H3BQX5|H3BQX5_HUMANSulfotransferase(Fragment)OS=HomosapiensGN=SULT1A1PE=1SV=8;sp|P50226|ST1A2_HUMANSulfotransferase1A2OS=HomosapiensGN=SULT1A2PE=1SV=2;sp|P0DMN0|ST1A4_HUMANSulfotransferase1A4OS=HomosapiensGN=SULT1A4PE=1SV=1;sp|P0DMM9|ST1A3_HU…	4;4;3;2;2;2;2;1;1;1	4;4;3;2;2;2;2;1;1;1	4;4;3;2;2;2;2;1;1;1	;;;;;;	10	4	4	4	1	0	0	1	0	3	2	0	3	1	0	1	0	1	1	1	0	0	0	0	1	1	0	0	1	0	3	2	0	3	1	0	1	0	1	1	1	0	0	0
sp|P50238|CRIP1_HUMANCysteine-richprotein1OS=HomosapiensGN=CRIP1PE=1SV=3	sp|P50238|CRIP1_HUMANCysteine-richprotein1OS=HomosapiensGN=CRIP1PE=1SV=3	2	2	2		1	2	2	2	0	0	0	0	0	1	0	0	1	0	0	0	0	0	0	2	2	0	0	0	0	0	0	0	0	0	1	0	0	1	0	0	0	0	0	0	2	2	0	0
sp|P50395|GDIB_HUMANRabGDPdissociationinhibitorbetaOS=HomosapiensGN=GDI2PE=1SV=2;tr|Q5SX87|Q5SX87_HUMANRabGDPdissociationinhibitor(Fragment)OS=HomosapiensGN=GDI2PE=1SV=1;tr|V9GYJ7|V9GYJ7_HUMANRabGDPdissociationinhibitor(Fragment)OS=HomosapiensGN=GDI2PE=1SV=8;tr|V9GYF8|V9GYF8_HUMANRabGDPdissociationinhibitor(Fragment)OS=HomosapiensGN=GDI2PE=1SV=1;tr|Q5SX90|Q5SX90_HUMANRabGDPdissociationinhibitor(F…	sp|P50395|GDIB_HUMANRabGDPdissociationinhibitorbetaOS=HomosapiensGN=GDI2PE=1SV=2;tr|Q5SX87|Q5SX87_HUMANRabGDPdissociationinhibitor(Fragment)OS=HomosapiensGN=GDI2PE=1SV=1	19;11;7;7;7;7;6	19;11;7;7;7;7;6	10;5;3;3;3;2;2	;	7	19	19	10	6	1	4	4	2	14	9	0	11	3	3	7	1	9	0	3	2	0	0	0	0	6	1	4	4	2	14	9	0	11	3	3	7	1	9	0	3	2	0	0
sp|P50552|VASP_HUMANVasodilator-stimulatedphosphoproteinOS=HomosapiensGN=VASPPE=1SV=3;tr|K7ENL7|K7ENL7_HUMANVasodilator-stimulatedphosphoproteinOS=HomosapiensGN=VASPPE=1SV=1;tr|K7ENR7|K7ENR7_HUMANVasodilator-stimulatedphosphoprotein(Fragment)OS=HomosapiensGN=VASPPE=1SV=1;tr|K7EQD0|K7EQD0_HUMANVasodilator-stimulatedphosphoprotein(Fragment)OS=HomosapiensGN=VASPPE=1SV=8;tr|K7EM16|K7EM16_HUMANVasodil…	sp|P50552|VASP_HUMANVasodilator-stimulatedphosphoproteinOS=HomosapiensGN=VASPPE=1SV=3	8;3;2;1;1	8;3;2;1;1	8;3;2;1;1		5	8	8	8	2	1	3	3	0	7	3	0	4	1	0	1	0	1	0	0	0	0	0	0	0	2	1	3	3	0	7	3	0	4	1	0	1	0	1	0	0	0	0	0
tr|K7EMQ3|K7EMQ3_HUMANDynamin-2(Fragment)OS=HomosapiensGN=DNM2PE=1SV=2;sp|P50570|DYN2_HUMANDynamin-2OS=HomosapiensGN=DNM2PE=1SV=2	tr|K7EMQ3|K7EMQ3_HUMANDynamin-2(Fragment)OS=HomosapiensGN=DNM2PE=1SV=2;sp|P50570|DYN2_HUMANDynamin-2OS=HomosapiensGN=DNM2PE=1SV=2	1;1	1;1	1;1	;	2	1	1	1	1	1	1	1	0	1	1	0	1	0	0	0	0	0	0	0	0	0	0	0	0	1	1	1	1	0	1	1	0	1	0	0	0	0	0	0	0	0	0	0
tr|E7EPB3|E7EPB3_HUMAN60SribosomalproteinL14OS=HomosapiensGN=RPL14PE=1SV=1;sp|P50914|RL14_HUMAN60SribosomalproteinL14OS=HomosapiensGN=RPL14PE=1SV=4	tr|E7EPB3|E7EPB3_HUMAN60SribosomalproteinL14OS=HomosapiensGN=RPL14PE=1SV=1;sp|P50914|RL14_HUMAN60SribosomalproteinL14OS=HomosapiensGN=RPL14PE=1SV=4	2;2	2;2	2;2	;	2	2	2	2	0	0	1	2	0	2	1	1	2	1	0	0	0	0	0	1	0	0	0	0	0	0	0	1	2	0	2	1	1	2	1	0	0	0	0	0	1	0	0	0
sp|P50991|TCPD_HUMANT-complexprotein1subunitdeltaOS=HomosapiensGN=CCT4PE=1SV=4	sp|P50991|TCPD_HUMANT-complexprotein1subunitdeltaOS=HomosapiensGN=CCT4PE=1SV=4	3	3	3		1	3	3	3	1	1	2	2	0	2	1	0	2	0	0	0	0	1	0	1	0	0	0	0	0	1	1	2	2	0	2	1	0	2	0	0	0	0	1	0	1	0	0	0
sp|P50995|ANX11_HUMANAnnexinA11OS=HomosapiensGN=ANXA11PE=1SV=1;tr|H0Y6E1|H0Y6E1_HUMANAnnexinA11(Fragment)OS=HomosapiensGN=ANXA11PE=1SV=1	sp|P50995|ANX11_HUMANAnnexinA11OS=HomosapiensGN=ANXA11PE=1SV=1	9;1	9;1	9;1		2	9	9	9	3	3	4	5	2	7	6	0	6	6	4	4	1	3	0	2	0	1	1	1	0	3	3	4	5	2	7	6	0	6	6	4	4	1	3	0	2	0	1	1
sp|P51149|RAB7A_HUMANRas-relatedproteinRab-7aOS=HomosapiensGN=RAB7APE=1SV=1;tr|C9J592|C9J592_HUMANRas-relatedproteinRab-7a(Fragment)OS=HomosapiensGN=RAB7APE=1SV=1;tr|C9J8S3|C9J8S3_HUMANRas-relatedproteinRab-7aOS=HomosapiensGN=RAB7APE=1SV=1;tr|C9IZZ0|C9IZZ0_HUMANRas-relatedproteinRab-7a(Fragment)OS=HomosapiensGN=RAB7APE=1SV=1;tr|C9J4V0|C9J4V0_HUMANRas-relatedproteinRab-7aOS=HomosapiensGN=RAB7APE=1…	sp|P51149|RAB7A_HUMANRas-relatedproteinRab-7aOS=HomosapiensGN=RAB7APE=1SV=1;tr|C9J592|C9J592_HUMANRas-relatedproteinRab-7a(Fragment)OS=HomosapiensGN=RAB7APE=1SV=1;tr|C9J8S3|C9J8S3_HUMANRas-relatedproteinRab-7aOS=HomosapiensGN=RAB7APE=1SV=1;tr|C9IZZ0|C9IZZ0_HUMANRas-relatedproteinRab-7a(Fragment)OS=HomosapiensGN=RAB7APE=1SV=1;tr|C9J4V0|C9J4V0_HUMANRas-relatedproteinRab-7aOS=HomosapiensGN=RAB7APE=1…	6;4;4;3;3;2;1	6;4;4;3;3;2;1	6;4;4;3;3;2;1	;;;;	7	6	6	6	2	1	4	2	0	4	4	0	2	4	2	1	1	1	0	1	0	1	2	1	0	2	1	4	2	0	4	4	0	2	4	2	1	1	1	0	1	0	1	2
tr|K7EII7|K7EII7_HUMANGalactokinase(Fragment)OS=HomosapiensGN=GALK1PE=1SV=1;sp|P51570|GALK1_HUMANGalactokinaseOS=HomosapiensGN=GALK1PE=1SV=1	tr|K7EII7|K7EII7_HUMANGalactokinase(Fragment)OS=HomosapiensGN=GALK1PE=1SV=1;sp|P51570|GALK1_HUMANGalactokinaseOS=HomosapiensGN=GALK1PE=1SV=1	1;1	1;1	1;1	;	2	1	1	1	0	0	0	0	0	0	1	0	0	0	0	1	0	1	0	0	0	0	0	0	0	0	0	0	0	0	0	1	0	0	0	0	1	0	1	0	0	0	0	0
sp|P51572|BAP31_HUMANB-cellreceptor-associatedprotein31OS=HomosapiensGN=BCAP31PE=1SV=3;tr|C9JMD7|C9JMD7_HUMANB-cellreceptor-associatedprotein31(Fragment)OS=HomosapiensGN=BCAP31PE=1SV=1;tr|C9JSP1|C9JSP1_HUMANB-cellreceptor-associatedprotein31(Fragment)OS=HomosapiensGN=BCAP31PE=1SV=1;tr|C9JQ75|C9JQ75_HUMANB-cellreceptor-associatedprotein31(Fragment)OS=HomosapiensGN=BCAP31PE=1SV=1;tr|C9J0M4|C9J0M4_H…	sp|P51572|BAP31_HUMANB-cellreceptor-associatedprotein31OS=HomosapiensGN=BCAP31PE=1SV=3;tr|C9JMD7|C9JMD7_HUMANB-cellreceptor-associatedprotein31(Fragment)OS=HomosapiensGN=BCAP31PE=1SV=1;tr|C9JSP1|C9JSP1_HUMANB-cellreceptor-associatedprotein31(Fragment)OS=HomosapiensGN=BCAP31PE=1SV=1;tr|C9JQ75|C9JQ75_HUMANB-cellreceptor-associatedprotein31(Fragment)OS=HomosapiensGN=BCAP31PE=1SV=1;tr|C9J0M4|C9J0M4_H…	2;1;1;1;1	2;1;1;1;1	2;1;1;1;1	;;;;	5	2	2	2	0	0	0	0	0	0	0	0	0	0	0	2	1	2	0	0	0	0	0	1	1	0	0	0	0	0	0	0	0	0	0	0	2	1	2	0	0	0	0	0
tr|I3L1M4|I3L1M4_HUMANFattyaldehydedehydrogenase(Fragment)OS=HomosapiensGN=ALDH3A2PE=1SV=1;tr|J3QRD1|J3QRD1_HUMANFattyaldehydedehydrogenaseOS=HomosapiensGN=ALDH3A2PE=1SV=1;sp|P51648|AL3A2_HUMANFattyaldehydedehydrogenaseOS=HomosapiensGN=ALDH3A2PE=1SV=1	tr|I3L1M4|I3L1M4_HUMANFattyaldehydedehydrogenase(Fragment)OS=HomosapiensGN=ALDH3A2PE=1SV=1;tr|J3QRD1|J3QRD1_HUMANFattyaldehydedehydrogenaseOS=HomosapiensGN=ALDH3A2PE=1SV=1;sp|P51648|AL3A2_HUMANFattyaldehydedehydrogenaseOS=HomosapiensGN=ALDH3A2PE=1SV=1	1;1;1	1;1;1	1;1;1	;;	3	1	1	1	1	0	0	0	0	0	0	0	0	0	0	0	0	1	0	0	0	0	0	0	0	1	0	0	0	0	0	0	0	0	0	0	0	0	1	0	0	0	0	0
sp|P51884|LUM_HUMANLumicanOS=HomosapiensGN=LUMPE=1SV=2	sp|P51884|LUM_HUMANLumicanOS=HomosapiensGN=LUMPE=1SV=2	3	3	3		1	3	3	3	0	0	0	0	0	1	0	0	0	0	0	1	2	0	0	0	1	0	0	0	0	0	0	0	0	0	1	0	0	0	0	0	1	2	0	0	0	1	0	0
sp|P52209|6PGD_HUMAN6-phosphogluconatedehydrogenase,decarboxylatingOS=HomosapiensGN=PGDPE=1SV=3;tr|K7EM49|K7EM49_HUMAN6-phosphogluconatedehydrogenase,decarboxylating(Fragment)OS=HomosapiensGN=PGDPE=1SV=1;tr|K7EPF6|K7EPF6_HUMAN6-phosphogluconatedehydrogenase,decarboxylating(Fragment)OS=HomosapiensGN=PGDPE=1SV=1;tr|K7EMN2|K7EMN2_HUMAN6-phosphogluconatedehydrogenase,decarboxylating(Fragment)OS=Homos…	sp|P52209|6PGD_HUMAN6-phosphogluconatedehydrogenase,decarboxylatingOS=HomosapiensGN=PGDPE=1SV=3;tr|K7EM49|K7EM49_HUMAN6-phosphogluconatedehydrogenase,decarboxylating(Fragment)OS=HomosapiensGN=PGDPE=1SV=1;tr|K7EPF6|K7EPF6_HUMAN6-phosphogluconatedehydrogenase,decarboxylating(Fragment)OS=HomosapiensGN=PGDPE=1SV=1;tr|K7EMN2|K7EMN2_HUMAN6-phosphogluconatedehydrogenase,decarboxylating(Fragment)OS=Homos…	18;11;11;9;4	18;11;11;9;4	18;11;11;9;4	;;;	5	18	18	18	7	6	6	8	2	16	9	0	15	5	1	7	3	6	1	3	1	1	2	1	0	7	6	6	8	2	16	9	0	15	5	1	7	3	6	1	3	1	1	2
tr|J3KTF8|J3KTF8_HUMANRhoGDP-dissociationinhibitor1(Fragment)OS=HomosapiensGN=ARHGDIAPE=1SV=8;sp|P52565|GDIR1_HUMANRhoGDP-dissociationinhibitor1OS=HomosapiensGN=ARHGDIAPE=1SV=3;tr|J3QQX2|J3QQX2_HUMANRhoGDP-dissociationinhibitor1OS=HomosapiensGN=ARHGDIAPE=1SV=1;tr|J3KRE2|J3KRE2_HUMANRhoGDP-dissociationinhibitor1OS=HomosapiensGN=ARHGDIAPE=1SV=1;tr|J3KRY1|J3KRY1_HUMANRhoGDP-dissociationinhibitor1(Fr…	tr|J3KTF8|J3KTF8_HUMANRhoGDP-dissociationinhibitor1(Fragment)OS=HomosapiensGN=ARHGDIAPE=1SV=8;sp|P52565|GDIR1_HUMANRhoGDP-dissociationinhibitor1OS=HomosapiensGN=ARHGDIAPE=1SV=3;tr|J3QQX2|J3QQX2_HUMANRhoGDP-dissociationinhibitor1OS=HomosapiensGN=ARHGDIAPE=1SV=1;tr|J3KRE2|J3KRE2_HUMANRhoGDP-dissociationinhibitor1OS=HomosapiensGN=ARHGDIAPE=1SV=1;tr|J3KRY1|J3KRY1_HUMANRhoGDP-dissociationinhibitor1(Fr…	5;5;5;4;4;3	5;5;5;4;4;3	5;5;5;4;4;3	;;;;;	6	5	5	5	2	2	3	2	0	1	1	0	0	1	2	2	1	1	1	3	0	0	0	0	0	2	2	3	2	0	1	1	0	0	1	2	2	1	1	1	3	0	0	0
sp|P52566|GDIR2_HUMANRhoGDP-dissociationinhibitor2OS=HomosapiensGN=ARHGDIBPE=1SV=3;tr|F5H3P3|F5H3P3_HUMANRhoGDP-dissociationinhibitor2(Fragment)OS=HomosapiensGN=ARHGDIBPE=1SV=8;tr|H0YGX7|H0YGX7_HUMANRhoGDP-dissociationinhibitor2(Fragment)OS=HomosapiensGN=ARHGDIBPE=1SV=1;tr|F5H6Q0|F5H6Q0_HUMANRhoGDP-dissociationinhibitor2(Fragment)OS=HomosapiensGN=ARHGDIBPE=1SV=1;tr|F5H2R5|F5H2R5_HUMANRhoGDP-disso…	sp|P52566|GDIR2_HUMANRhoGDP-dissociationinhibitor2OS=HomosapiensGN=ARHGDIBPE=1SV=3;tr|F5H3P3|F5H3P3_HUMANRhoGDP-dissociationinhibitor2(Fragment)OS=HomosapiensGN=ARHGDIBPE=1SV=8;tr|H0YGX7|H0YGX7_HUMANRhoGDP-dissociationinhibitor2(Fragment)OS=HomosapiensGN=ARHGDIBPE=1SV=1;tr|F5H6Q0|F5H6Q0_HUMANRhoGDP-dissociationinhibitor2(Fragment)OS=HomosapiensGN=ARHGDIBPE=1SV=1;tr|F5H2R5|F5H2R5_HUMANRhoGDP-disso…	6;5;5;4;3	6;5;5;4;3	6;5;5;4;3	;;;;	5	6	6	6	2	1	4	4	1	4	2	0	4	2	3	3	1	3	1	0	0	0	0	2	0	2	1	4	4	1	4	2	0	4	2	3	3	1	3	1	0	0	0	0
sp|P52790|HXK3_HUMANHexokinase-3OS=HomosapiensGN=HK3PE=1SV=2;tr|H0Y9N6|H0Y9N6_HUMANPhosphotransferase(Fragment)OS=HomosapiensGN=HK3PE=1SV=8;sp|Q2TB90|HKDC1_HUMANPutativehexokinaseHKDC1OS=HomosapiensGN=HKDC1PE=1SV=3	sp|P52790|HXK3_HUMANHexokinase-3OS=HomosapiensGN=HK3PE=1SV=2	11;1;1	11;1;1	9;1;0		3	11	11	9	5	1	6	4	0	6	5	0	5	1	0	1	0	1	0	0	0	0	0	1	0	5	1	6	4	0	6	5	0	5	1	0	1	0	1	0	0	0	0	0
tr|B4DK69|B4DK69_HUMANAldo-ketoreductasefamily1memberC2OS=HomosapiensGN=AKR1C2PE=1SV=1;sp|Q04828|AK1C1_HUMANAldo-ketoreductasefamily1memberC1OS=HomosapiensGN=AKR1C1PE=1SV=1;sp|P52895|AK1C2_HUMANAldo-ketoreductasefamily1memberC2OS=HomosapiensGN=AKR1C2PE=1SV=3;tr|S4R3P0|S4R3P0_HUMANAldo-ketoreductasefamily1memberC2(Fragment)OS=HomosapiensGN=AKR1C2PE=1SV=1;tr|H0Y804|H0Y804_HUMANAldo-ketoreductasefam…	tr|B4DK69|B4DK69_HUMANAldo-ketoreductasefamily1memberC2OS=HomosapiensGN=AKR1C2PE=1SV=1;sp|Q04828|AK1C1_HUMANAldo-ketoreductasefamily1memberC1OS=HomosapiensGN=AKR1C1PE=1SV=1;sp|P52895|AK1C2_HUMANAldo-ketoreductasefamily1memberC2OS=HomosapiensGN=AKR1C2PE=1SV=3;tr|S4R3P0|S4R3P0_HUMANAldo-ketoreductasefamily1memberC2(Fragment)OS=HomosapiensGN=AKR1C2PE=1SV=1;tr|H0Y804|H0Y804_HUMANAldo-ketoreductasefam…	2;2;2;1;1;1;1;1	2;2;2;1;1;1;1;1	2;2;2;1;1;1;1;1	;;;;;;;	8	2	2	2	1	0	0	0	0	2	2	0	1	1	0	0	0	0	0	0	0	0	0	0	0	1	0	0	0	0	2	2	0	1	1	0	0	0	0	0	0	0	0	0
sp|P52907|CAZA1_HUMANF-actin-cappingproteinsubunitalpha-1OS=HomosapiensGN=CAPZA1PE=1SV=3	sp|P52907|CAZA1_HUMANF-actin-cappingproteinsubunitalpha-1OS=HomosapiensGN=CAPZA1PE=1SV=3	6	6	4		1	6	6	4	2	1	3	2	0	6	4	0	1	2	1	0	1	1	0	3	1	0	0	0	0	2	1	3	2	0	6	4	0	1	2	1	0	1	1	0	3	1	0	0
tr|H0YHD8|H0YHD8_HUMANCysteine-richprotein2(Fragment)OS=HomosapiensGN=CRIP2PE=1SV=1;tr|H0YFA4|H0YFA4_HUMANCysteine-richprotein2(Fragment)OS=HomosapiensGN=CRIP2PE=1SV=1;sp|P52943|CRIP2_HUMANCysteine-richprotein2OS=HomosapiensGN=CRIP2PE=1SV=1	tr|H0YHD8|H0YHD8_HUMANCysteine-richprotein2(Fragment)OS=HomosapiensGN=CRIP2PE=1SV=1;tr|H0YFA4|H0YFA4_HUMANCysteine-richprotein2(Fragment)OS=HomosapiensGN=CRIP2PE=1SV=1;sp|P52943|CRIP2_HUMANCysteine-richprotein2OS=HomosapiensGN=CRIP2PE=1SV=1	1;1;1	1;1;1	1;1;1	;;	3	1	1	1	0	0	0	0	0	1	0	0	1	0	1	1	0	1	0	0	0	0	0	0	0	0	0	0	0	0	1	0	0	1	0	1	1	0	1	0	0	0	0	0
sp|P53004|BIEA_HUMANBiliverdinreductaseAOS=HomosapiensGN=BLVRAPE=1SV=2;tr|C9J1E1|C9J1E1_HUMANBiliverdinreductaseA(Fragment)OS=HomosapiensGN=BLVRAPE=1SV=1	sp|P53004|BIEA_HUMANBiliverdinreductaseAOS=HomosapiensGN=BLVRAPE=1SV=2;tr|C9J1E1|C9J1E1_HUMANBiliverdinreductaseA(Fragment)OS=HomosapiensGN=BLVRAPE=1SV=1	2;1	2;1	2;1	;	2	2	2	2	2	0	1	0	0	1	1	0	2	1	0	1	1	1	0	1	1	1	0	1	0	2	0	1	0	0	1	1	0	2	1	0	1	1	1	0	1	1	1	0
tr|B4DP62|B4DP62_HUMANSolutecarrierfamily25(Mitochondrialcarriercitratetransporter),member1,isoformCRA_bOS=HomosapiensGN=SLC25A1PE=1SV=1;sp|P53007|TXTP_HUMANTricarboxylatetransportprotein,mitochondrialOS=HomosapiensGN=SLC25A1PE=1SV=2	tr|B4DP62|B4DP62_HUMANSolutecarrierfamily25(Mitochondrialcarriercitratetransporter),member1,isoformCRA_bOS=HomosapiensGN=SLC25A1PE=1SV=1;sp|P53007|TXTP_HUMANTricarboxylatetransportprotein,mitochondrialOS=HomosapiensGN=SLC25A1PE=1SV=2	1;1	1;1	1;1	;	2	1	1	1	0	0	0	0	0	0	0	0	0	0	0	1	0	1	0	0	0	0	0	0	0	0	0	0	0	0	0	0	0	0	0	0	1	0	1	0	0	0	0	0
sp|P53396|ACLY_HUMANATP-citratesynthaseOS=HomosapiensGN=ACLYPE=1SV=3;tr|K7ESG8|K7ESG8_HUMANATP-citratesynthase(Fragment)OS=HomosapiensGN=ACLYPE=1SV=1	sp|P53396|ACLY_HUMANATP-citratesynthaseOS=HomosapiensGN=ACLYPE=1SV=3	8;2	8;2	8;2		2	8	8	8	5	4	2	3	2	7	3	0	6	0	2	2	0	0	1	3	2	1	0	1	1	5	4	2	3	2	7	3	0	6	0	2	2	0	0	1	3	2	1	0
sp|P53618|COPB_HUMANCoatomersubunitbetaOS=HomosapiensGN=COPB1PE=1SV=3;tr|E9PP73|E9PP73_HUMANCoatomersubunitbeta(Fragment)OS=HomosapiensGN=COPB1PE=1SV=8;tr|E9PP63|E9PP63_HUMANCoatomersubunitbeta(Fragment)OS=HomosapiensGN=COPB1PE=1SV=1;tr|E9PKQ1|E9PKQ1_HUMANCoatomersubunitbeta(Fragment)OS=HomosapiensGN=COPB1PE=1SV=1	sp|P53618|COPB_HUMANCoatomersubunitbetaOS=HomosapiensGN=COPB1PE=1SV=3;tr|E9PP73|E9PP73_HUMANCoatomersubunitbeta(Fragment)OS=HomosapiensGN=COPB1PE=1SV=8	4;3;1;1	4;3;1;1	4;3;1;1	;	4	4	4	4	1	1	1	1	0	0	0	0	1	0	2	2	0	2	0	0	0	0	0	0	0	1	1	1	1	0	0	0	0	1	0	2	2	0	2	0	0	0	0	0
sp|P53621|COPA_HUMANCoatomersubunitalphaOS=HomosapiensGN=COPAPE=1SV=2	sp|P53621|COPA_HUMANCoatomersubunitalphaOS=HomosapiensGN=COPAPE=1SV=2	5	5	5		1	5	5	5	3	0	3	1	0	4	1	0	4	1	1	0	0	1	0	1	0	0	0	0	0	3	0	3	1	0	4	1	0	4	1	1	0	0	1	0	1	0	0	0
sp|P53634|CATC_HUMANDipeptidylpeptidase1OS=HomosapiensGN=CTSCPE=1SV=2	sp|P53634|CATC_HUMANDipeptidylpeptidase1OS=HomosapiensGN=CTSCPE=1SV=2	1	1	1		1	1	1	1	1	1	1	1	0	1	1	0	1	0	0	1	0	1	0	0	0	0	0	0	0	1	1	1	1	0	1	1	0	1	0	0	1	0	1	0	0	0	0	0
sp|P53990|IST1_HUMANIST1homologOS=HomosapiensGN=IST1PE=1SV=1;tr|F5GXM3|F5GXM3_HUMANIST1homolog(Fragment)OS=HomosapiensGN=IST1PE=1SV=1;tr|H3BQF7|H3BQF7_HUMANIST1homolog(Fragment)OS=HomosapiensGN=IST1PE=1SV=1;tr|H3BMU1|H3BMU1_HUMANIST1homolog(Fragment)OS=HomosapiensGN=IST1PE=1SV=1;tr|H3BUI0|H3BUI0_HUMANIST1homolog(Fragment)OS=HomosapiensGN=IST1PE=1SV=1;tr|H3BPP6|H3BPP6_HUMANIST1homolog(Fragment)OS=…	sp|P53990|IST1_HUMANIST1homologOS=HomosapiensGN=IST1PE=1SV=1;tr|F5GXM3|F5GXM3_HUMANIST1homolog(Fragment)OS=HomosapiensGN=IST1PE=1SV=1;tr|H3BQF7|H3BQF7_HUMANIST1homolog(Fragment)OS=HomosapiensGN=IST1PE=1SV=1;tr|H3BMU1|H3BMU1_HUMANIST1homolog(Fragment)OS=HomosapiensGN=IST1PE=1SV=1;tr|H3BUI0|H3BUI0_HUMANIST1homolog(Fragment)OS=HomosapiensGN=IST1PE=1SV=1;tr|H3BPP6|H3BPP6_HUMANIST1homolog(Fragment)OS=…	4;3;3;3;3;2;2;1;1;1	4;3;3;3;3;2;2;1;1;1	4;3;3;3;3;2;2;1;1;1	;;;;;;	10	4	4	4	0	0	0	2	0	0	2	0	0	0	0	0	0	2	0	1	1	0	0	0	0	0	0	0	2	0	0	2	0	0	0	0	0	0	2	0	1	1	0	0
tr|M0R0Y2|M0R0Y2_HUMANAlpha-solubleNSFattachmentproteinOS=HomosapiensGN=NAPAPE=1SV=1;sp|P54920|SNAA_HUMANAlpha-solubleNSFattachmentproteinOS=HomosapiensGN=NAPAPE=1SV=3;tr|M0R2M1|M0R2M1_HUMANAlpha-solubleNSFattachmentprotein(Fragment)OS=HomosapiensGN=NAPAPE=1SV=1;tr|M0R213|M0R213_HUMANAlpha-solubleNSFattachmentprotein(Fragment)OS=HomosapiensGN=NAPAPE=1SV=1;tr|M0R027|M0R027_HUMANAlpha-solubleNSFatt…	tr|M0R0Y2|M0R0Y2_HUMANAlpha-solubleNSFattachmentproteinOS=HomosapiensGN=NAPAPE=1SV=1;sp|P54920|SNAA_HUMANAlpha-solubleNSFattachmentproteinOS=HomosapiensGN=NAPAPE=1SV=3;tr|M0R2M1|M0R2M1_HUMANAlpha-solubleNSFattachmentprotein(Fragment)OS=HomosapiensGN=NAPAPE=1SV=1	3;3;2;1;1;1;1;1	3;3;2;1;1;1;1;1	3;3;2;1;1;1;1;1	;;	8	3	3	3	2	0	1	3	0	1	1	0	1	0	1	1	1	2	0	0	0	0	0	1	0	2	0	1	3	0	1	1	0	1	0	1	1	1	2	0	0	0	0	0
tr|J3QL90|J3QL90_HUMANDevelopmentally-regulatedGTP-bindingprotein2OS=HomosapiensGN=DRG2PE=1SV=1;tr|J3KRL5|J3KRL5_HUMANDevelopmentally-regulatedGTP-bindingprotein2(Fragment)OS=HomosapiensGN=DRG2PE=1SV=1;tr|J3QR71|J3QR71_HUMANDevelopmentally-regulatedGTP-bindingprotein2(Fragment)OS=HomosapiensGN=DRG2PE=1SV=1;tr|J3QKV7|J3QKV7_HUMANDevelopmentally-regulatedGTP-bindingprotein2OS=HomosapiensGN=DRG2PE=1…	tr|J3QL90|J3QL90_HUMANDevelopmentally-regulatedGTP-bindingprotein2OS=HomosapiensGN=DRG2PE=1SV=1;tr|J3KRL5|J3KRL5_HUMANDevelopmentally-regulatedGTP-bindingprotein2(Fragment)OS=HomosapiensGN=DRG2PE=1SV=1;tr|J3QR71|J3QR71_HUMANDevelopmentally-regulatedGTP-bindingprotein2(Fragment)OS=HomosapiensGN=DRG2PE=1SV=1;tr|J3QKV7|J3QKV7_HUMANDevelopmentally-regulatedGTP-bindingprotein2OS=HomosapiensGN=DRG2PE=1…	1;1;1;1;1;1;1;1	1;1;1;1;1;1;1;1	1;1;1;1;1;1;1;1	;;;;;;;	8	1	1	1	0	0	0	0	0	0	0	0	0	0	0	0	0	0	0	0	1	0	0	0	0	0	0	0	0	0	0	0	0	0	0	0	0	0	0	0	0	1	0	0
tr|J3KRG9|J3KRG9_HUMANGTP-bindingproteinRAD(Fragment)OS=HomosapiensGN=RRADPE=1SV=1;tr|J3KSM6|J3KSM6_HUMANGTP-bindingproteinRAD(Fragment)OS=HomosapiensGN=RRADPE=1SV=1;sp|P55042|RAD_HUMANGTP-bindingproteinRADOS=HomosapiensGN=RRADPE=1SV=2	tr|J3KRG9|J3KRG9_HUMANGTP-bindingproteinRAD(Fragment)OS=HomosapiensGN=RRADPE=1SV=1;tr|J3KSM6|J3KSM6_HUMANGTP-bindingproteinRAD(Fragment)OS=HomosapiensGN=RRADPE=1SV=1;sp|P55042|RAD_HUMANGTP-bindingproteinRADOS=HomosapiensGN=RRADPE=1SV=2	1;1;1	1;1;1	1;1;1	;;	3	1	1	1	0	0	0	0	0	0	0	0	0	0	1	1	0	1	0	0	0	0	0	0	0	0	0	0	0	0	0	0	0	0	0	1	1	0	1	0	0	0	0	0
sp|P55058|PLTP_HUMANPhospholipidtransferproteinOS=HomosapiensGN=PLTPPE=1SV=1	sp|P55058|PLTP_HUMANPhospholipidtransferproteinOS=HomosapiensGN=PLTPPE=1SV=1	2	2	2		1	2	2	2	2	1	2	1	0	1	0	0	1	0	0	1	1	2	0	1	0	0	0	1	0	2	1	2	1	0	1	0	0	1	0	0	1	1	2	0	1	0	0	0
sp|P55060|XPO2_HUMANExportin-2OS=HomosapiensGN=CSE1LPE=1SV=3	sp|P55060|XPO2_HUMANExportin-2OS=HomosapiensGN=CSE1LPE=1SV=3	2	2	2		1	2	2	2	1	0	0	0	0	0	0	0	0	0	1	2	0	1	0	0	0	1	0	0	0	1	0	0	0	0	0	0	0	0	0	1	2	0	1	0	0	0	1	0
sp|P55064|AQP5_HUMANAquaporin-5OS=HomosapiensGN=AQP5PE=1SV=1	sp|P55064|AQP5_HUMANAquaporin-5OS=HomosapiensGN=AQP5PE=1SV=1	1	1	1		1	1	1	1	0	0	0	1	0	0	0	0	0	0	0	0	0	0	0	1	0	0	0	0	0	0	0	0	1	0	0	0	0	0	0	0	0	0	0	0	1	0	0	0
sp|P55072|TERA_HUMANTransitionalendoplasmicreticulumATPaseOS=HomosapiensGN=VCPPE=1SV=4	sp|P55072|TERA_HUMANTransitionalendoplasmicreticulumATPaseOS=HomosapiensGN=VCPPE=1SV=4	24	24	21		1	24	24	21	13	8	10	7	2	21	18	0	18	9	5	6	3	6	0	10	4	1	0	1	2	13	8	10	7	2	21	18	0	18	9	5	6	3	6	0	10	4	1	0
tr|F5GZQ3|F5GZQ3_HUMANTrifunctionalenzymesubunitbeta,mitochondrialOS=HomosapiensGN=HADHBPE=1SV=1;sp|P55084|ECHB_HUMANTrifunctionalenzymesubunitbeta,mitochondrialOS=HomosapiensGN=HADHBPE=1SV=3;tr|B5MD38|B5MD38_HUMANTrifunctionalenzymesubunitbeta,mitochondrialOS=HomosapiensGN=HADHBPE=1SV=1	tr|F5GZQ3|F5GZQ3_HUMANTrifunctionalenzymesubunitbeta,mitochondrialOS=HomosapiensGN=HADHBPE=1SV=1;sp|P55084|ECHB_HUMANTrifunctionalenzymesubunitbeta,mitochondrialOS=HomosapiensGN=HADHBPE=1SV=3;tr|B5MD38|B5MD38_HUMANTrifunctionalenzymesubunitbeta,mitochondrialOS=HomosapiensGN=HADHBPE=1SV=1	2;2;1	2;2;1	2;2;1	;;	3	2	2	2	0	0	0	0	0	1	0	0	0	0	1	1	0	2	0	0	0	2	0	1	0	0	0	0	0	0	1	0	0	0	0	1	1	0	2	0	0	0	2	0
tr|F8W050|F8W050_HUMANNck-associatedprotein1-likeOS=HomosapiensGN=NCKAP1LPE=1SV=1;sp|P55160|NCKPL_HUMANNck-associatedprotein1-likeOS=HomosapiensGN=NCKAP1LPE=1SV=3	tr|F8W050|F8W050_HUMANNck-associatedprotein1-likeOS=HomosapiensGN=NCKAP1LPE=1SV=1;sp|P55160|NCKPL_HUMANNck-associatedprotein1-likeOS=HomosapiensGN=NCKAP1LPE=1SV=3	2;2	2;2	2;2	;	2	2	2	2	0	0	0	0	0	0	0	0	1	0	0	1	1	1	1	0	0	0	0	1	1	0	0	0	0	0	0	0	0	1	0	0	1	1	1	1	0	0	0	0
tr|H0YH88|H0YH88_HUMANNucleosomeassemblyprotein1-like1(Fragment)OS=HomosapiensGN=NAP1L1PE=1SV=1;tr|H0YHC3|H0YHC3_HUMANNucleosomeassemblyprotein1-like1(Fragment)OS=HomosapiensGN=NAP1L1PE=1SV=1;tr|F8W020|F8W020_HUMANNucleosomeassemblyprotein1-like1(Fragment)OS=HomosapiensGN=NAP1L1PE=1SV=1;tr|F8W118|F8W118_HUMANNucleosomeassemblyprotein1-like1(Fragment)OS=HomosapiensGN=NAP1L1PE=1SV=1;tr|F8VXI6|F8VXI…	tr|H0YH88|H0YH88_HUMANNucleosomeassemblyprotein1-like1(Fragment)OS=HomosapiensGN=NAP1L1PE=1SV=1;tr|H0YHC3|H0YHC3_HUMANNucleosomeassemblyprotein1-like1(Fragment)OS=HomosapiensGN=NAP1L1PE=1SV=1;tr|F8W020|F8W020_HUMANNucleosomeassemblyprotein1-like1(Fragment)OS=HomosapiensGN=NAP1L1PE=1SV=1;tr|F8W118|F8W118_HUMANNucleosomeassemblyprotein1-like1(Fragment)OS=HomosapiensGN=NAP1L1PE=1SV=1;tr|F8VXI6|F8VXI…	1;1;1;1;1;1;1;1;1;1;1;1;1;1	1;1;1;1;1;1;1;1;1;1;1;1;1;1	1;1;1;1;1;1;1;1;1;1;1;1;1;1	;;;;;;;;;;;;;	14	1	1	1	1	0	1	1	0	0	0	0	0	0	0	0	0	0	0	0	0	0	0	0	0	1	0	1	1	0	0	0	0	0	0	0	0	0	0	0	0	0	0	0
tr|E9PLK3|E9PLK3_HUMANAminopeptidaseOS=HomosapiensGN=NPEPPSPE=1SV=1;sp|P55786|PSA_HUMANPuromycin-sensitiveaminopeptidaseOS=HomosapiensGN=NPEPPSPE=1SV=2;tr|H0YDG0|H0YDG0_HUMANPuromycin-sensitiveaminopeptidase(Fragment)OS=HomosapiensGN=NPEPPSPE=1SV=1;tr|H0YCQ5|H0YCQ5_HUMANPuromycin-sensitiveaminopeptidase(Fragment)OS=HomosapiensGN=NPEPPSPE=1SV=1;tr|E9PP11|E9PP11_HUMANPuromycin-sensitiveaminopeptida…	tr|E9PLK3|E9PLK3_HUMANAminopeptidaseOS=HomosapiensGN=NPEPPSPE=1SV=1;sp|P55786|PSA_HUMANPuromycin-sensitiveaminopeptidaseOS=HomosapiensGN=NPEPPSPE=1SV=2	10;10;3;2;1;1	10;10;3;2;1;1	10;10;3;2;1;1	;	6	10	10	10	1	2	1	1	0	8	3	0	7	1	1	4	0	4	0	1	0	0	0	0	0	1	2	1	1	0	8	3	0	7	1	1	4	0	4	0	1	0	0	0
tr|C9JQN7|C9JQN7_HUMANEukaryotictranslationinitiationfactor3subunitB(Fragment)OS=HomosapiensGN=EIF3BPE=1SV=1;tr|C9JZG1|C9JZG1_HUMANEukaryotictranslationinitiationfactor3subunitB(Fragment)OS=HomosapiensGN=EIF3BPE=1SV=1;sp|P55884|EIF3B_HUMANEukaryotictranslationinitiationfactor3subunitBOS=HomosapiensGN=EIF3BPE=1SV=3	tr|C9JQN7|C9JQN7_HUMANEukaryotictranslationinitiationfactor3subunitB(Fragment)OS=HomosapiensGN=EIF3BPE=1SV=1;tr|C9JZG1|C9JZG1_HUMANEukaryotictranslationinitiationfactor3subunitB(Fragment)OS=HomosapiensGN=EIF3BPE=1SV=1;sp|P55884|EIF3B_HUMANEukaryotictranslationinitiationfactor3subunitBOS=HomosapiensGN=EIF3BPE=1SV=3	1;1;1	1;1;1	1;1;1	;;	3	1	1	1	0	0	0	0	0	0	0	0	0	0	0	0	1	1	0	0	0	0	0	0	0	0	0	0	0	0	0	0	0	0	0	0	0	1	1	0	0	0	0	0
sp|P55957|BID_HUMANBH3-interactingdomaindeathagonistOS=HomosapiensGN=BIDPE=1SV=1	sp|P55957|BID_HUMANBH3-interactingdomaindeathagonistOS=HomosapiensGN=BIDPE=1SV=1	1	1	1		1	1	1	1	1	1	1	0	0	0	0	0	0	0	1	1	1	1	0	0	0	0	0	0	0	1	1	1	0	0	0	0	0	0	0	1	1	1	1	0	0	0	0	0
tr|C9JJT5|C9JJT5_HUMANATP5J2-PTCD1readthroughOS=HomosapiensGN=ATP5J2-PTCD1PE=4SV=2;sp|P56134|ATPK_HUMANATPsynthasesubunitf,mitochondrialOS=HomosapiensGN=ATP5J2PE=1SV=3;tr|C9JU26|C9JU26_HUMANATPsynthasesubunitf,mitochondrialOS=HomosapiensGN=ATP5J2PE=1SV=1;tr|G3V325|G3V325_HUMANATP5J2-PTCD1readthroughOS=HomosapiensGN=ATP5J2-PTCD1PE=4SV=1	tr|C9JJT5|C9JJT5_HUMANATP5J2-PTCD1readthroughOS=HomosapiensGN=ATP5J2-PTCD1PE=4SV=2;sp|P56134|ATPK_HUMANATPsynthasesubunitf,mitochondrialOS=HomosapiensGN=ATP5J2PE=1SV=3;tr|C9JU26|C9JU26_HUMANATPsynthasesubunitf,mitochondrialOS=HomosapiensGN=ATP5J2PE=1SV=1;tr|G3V325|G3V325_HUMANATP5J2-PTCD1readthroughOS=HomosapiensGN=ATP5J2-PTCD1PE=4SV=1	1;1;1;1	1;1;1;1	1;1;1;1	;;;	4	1	1	1	1	0	0	0	0	1	0	0	0	0	0	0	0	0	0	0	0	0	0	0	0	1	0	0	0	0	1	0	0	0	0	0	0	0	0	0	0	0	0	0
sp|P56597|NDK5_HUMANNucleosidediphosphatekinasehomolog5OS=HomosapiensGN=NME5PE=1SV=1	sp|P56597|NDK5_HUMANNucleosidediphosphatekinasehomolog5OS=HomosapiensGN=NME5PE=1SV=1	2	2	2		1	2	2	2	2	0	1	1	0	0	0	0	0	0	1	1	0	1	0	0	0	0	1	0	0	2	0	1	1	0	0	0	0	0	0	1	1	0	1	0	0	0	0	1
sp|P57078|RIPK4_HUMANReceptor-interactingserine/threonine-proteinkinase4OS=HomosapiensGN=RIPK4PE=1SV=1	sp|P57078|RIPK4_HUMANReceptor-interactingserine/threonine-proteinkinase4OS=HomosapiensGN=RIPK4PE=1SV=1	1	1	1		1	1	1	1	0	0	0	0	0	0	0	0	0	0	0	0	0	0	0	0	0	1	1	1	0	0	0	0	0	0	0	0	0	0	0	0	0	0	0	0	0	0	1	1
sp|P57737|CORO7_HUMANCoronin-7OS=HomosapiensGN=CORO7PE=1SV=2;tr|A0A0A6YYL4|A0A0A6YYL4_HUMANCoroninOS=HomosapiensGN=CORO7-PAM16PE=3SV=1;tr|E7EP81|E7EP81_HUMANCoronin-7OS=HomosapiensGN=CORO7PE=4SV=1;tr|I3L167|I3L167_HUMANCoroninOS=HomosapiensGN=CORO7-PAM16PE=3SV=1	sp|P57737|CORO7_HUMANCoronin-7OS=HomosapiensGN=CORO7PE=1SV=2;tr|A0A0A6YYL4|A0A0A6YYL4_HUMANCoroninOS=HomosapiensGN=CORO7-PAM16PE=3SV=1;tr|E7EP81|E7EP81_HUMANCoronin-7OS=HomosapiensGN=CORO7PE=4SV=1;tr|I3L167|I3L167_HUMANCoroninOS=HomosapiensGN=CORO7-PAM16PE=3SV=1	4;4;2;2	4;4;2;2	4;4;2;2	;;;	4	4	4	4	3	2	0	0	1	1	1	0	2	1	1	1	0	1	0	0	0	0	0	0	0	3	2	0	0	1	1	1	0	2	1	1	1	0	1	0	0	0	0	0
tr|E9PQ48|E9PQ48_HUMANGasdermin-D(Fragment)OS=HomosapiensGN=GSDMDPE=1SV=1;tr|E9PNZ0|E9PNZ0_HUMANGasdermin-D(Fragment)OS=HomosapiensGN=GSDMDPE=1SV=8;tr|E9PQR9|E9PQR9_HUMANGasdermin-D(Fragment)OS=HomosapiensGN=GSDMDPE=1SV=1;tr|E9PIB2|E9PIB2_HUMANGasdermin-D(Fragment)OS=HomosapiensGN=GSDMDPE=1SV=1;sp|P57764|GSDMD_HUMANGasdermin-DOS=HomosapiensGN=GSDMDPE=1SV=1;tr|G3V1A6|G3V1A6_HUMANGasdermindomaincon…	tr|E9PQ48|E9PQ48_HUMANGasdermin-D(Fragment)OS=HomosapiensGN=GSDMDPE=1SV=1;tr|E9PNZ0|E9PNZ0_HUMANGasdermin-D(Fragment)OS=HomosapiensGN=GSDMDPE=1SV=8;tr|E9PQR9|E9PQR9_HUMANGasdermin-D(Fragment)OS=HomosapiensGN=GSDMDPE=1SV=1;tr|E9PIB2|E9PIB2_HUMANGasdermin-D(Fragment)OS=HomosapiensGN=GSDMDPE=1SV=1;sp|P57764|GSDMD_HUMANGasdermin-DOS=HomosapiensGN=GSDMDPE=1SV=1;tr|G3V1A6|G3V1A6_HUMANGasdermindomaincon…	1;1;1;1;1;1	1;1;1;1;1;1	1;1;1;1;1;1	;;;;;	6	1	1	1	0	0	0	0	0	0	0	0	0	0	1	0	0	0	0	0	0	0	0	0	1	0	0	0	0	0	0	0	0	0	0	1	0	0	0	0	0	0	0	0
tr|C9J3M3|C9J3M3_HUMANMyeloidleukemiafactor1(Fragment)OS=HomosapiensGN=MLF1PE=1SV=1;sp|P58340|MLF1_HUMANMyeloidleukemiafactor1OS=HomosapiensGN=MLF1PE=1SV=1;tr|C9K0D3|C9K0D3_HUMANMyeloidleukemiafactor1(Fragment)OS=HomosapiensGN=MLF1PE=1SV=1;tr|C9K0D4|C9K0D4_HUMANMyeloidleukemiafactor1(Fragment)OS=HomosapiensGN=MLF1PE=1SV=1;tr|C9JNE5|C9JNE5_HUMANMyeloidleukemiafactor1(Fragment)OS=HomosapiensGN=MLF1…	tr|C9J3M3|C9J3M3_HUMANMyeloidleukemiafactor1(Fragment)OS=HomosapiensGN=MLF1PE=1SV=1;sp|P58340|MLF1_HUMANMyeloidleukemiafactor1OS=HomosapiensGN=MLF1PE=1SV=1;tr|C9K0D3|C9K0D3_HUMANMyeloidleukemiafactor1(Fragment)OS=HomosapiensGN=MLF1PE=1SV=1;tr|C9K0D4|C9K0D4_HUMANMyeloidleukemiafactor1(Fragment)OS=HomosapiensGN=MLF1PE=1SV=1;tr|C9JNE5|C9JNE5_HUMANMyeloidleukemiafactor1(Fragment)OS=HomosapiensGN=MLF1…	4;4;3;3;3	4;4;3;3;3	4;4;3;3;3	;;;;	5	4	4	4	2	0	3	4	0	2	0	0	0	0	1	0	0	1	0	0	0	0	0	0	0	2	0	3	4	0	2	0	0	0	0	1	0	0	1	0	0	0	0	0
sp|Q99879|H2B1M_HUMANHistoneH2Btype1-MOS=HomosapiensGN=HIST1H2BMPE=1SV=3;sp|Q99877|H2B1N_HUMANHistoneH2Btype1-NOS=HomosapiensGN=HIST1H2BNPE=1SV=3;sp|Q93079|H2B1H_HUMANHistoneH2Btype1-HOS=HomosapiensGN=HIST1H2BHPE=1SV=3;sp|Q5QNW6|H2B2F_HUMANHistoneH2Btype2-FOS=HomosapiensGN=HIST2H2BFPE=1SV=3;sp|P62807|H2B1C_HUMANHistoneH2Btype1-C/E/F/G/IOS=HomosapiensGN=HIST1H2BCPE=1SV=4;sp|P58876|H2B1D_HUMANHisto…	sp|Q99879|H2B1M_HUMANHistoneH2Btype1-MOS=HomosapiensGN=HIST1H2BMPE=1SV=3;sp|Q99877|H2B1N_HUMANHistoneH2Btype1-NOS=HomosapiensGN=HIST1H2BNPE=1SV=3;sp|Q93079|H2B1H_HUMANHistoneH2Btype1-HOS=HomosapiensGN=HIST1H2BHPE=1SV=3;sp|Q5QNW6|H2B2F_HUMANHistoneH2Btype2-FOS=HomosapiensGN=HIST2H2BFPE=1SV=3;sp|P62807|H2B1C_HUMANHistoneH2Btype1-C/E/F/G/IOS=HomosapiensGN=HIST1H2BCPE=1SV=4;sp|P58876|H2B1D_HUMANHisto…	16;16;16;16;16;16;16;14	16;16;16;16;16;16;16;14	0;0;0;0;0;0;0;0	;;;;;;;	8	16	16	0	6	6	9	9	4	10	5	3	9	5	4	4	5	4	4	10	7	13	10	13	1	6	6	9	9	4	10	5	3	9	5	4	4	5	4	4	10	7	13	10
sp|P59666|DEF3_HUMANNeutrophildefensin3OS=HomosapiensGN=DEFA3PE=1SV=1;sp|P59665|DEF1_HUMANNeutrophildefensin1OS=HomosapiensGN=DEFA1PE=1SV=1	sp|P59666|DEF3_HUMANNeutrophildefensin3OS=HomosapiensGN=DEFA3PE=1SV=1;sp|P59665|DEF1_HUMANNeutrophildefensin1OS=HomosapiensGN=DEFA1PE=1SV=1	5;5	5;5	5;5	;	2	5	5	5	2	2	4	4	3	4	4	0	3	3	2	4	0	4	1	5	4	5	4	3	1	2	2	4	4	3	4	4	0	3	3	2	4	0	4	1	5	4	5	4
sp|P59768|GBG2_HUMANGuaninenucleotide-bindingproteinG(I)/G(S)/G(O)subunitgamma-2OS=HomosapiensGN=GNG2PE=1SV=2;tr|G3V3J9|G3V3J9_HUMANGuaninenucleotide-bindingproteinsubunitgammaOS=HomosapiensGN=GNG2PE=1SV=1;tr|G3V2N0|G3V2N0_HUMANGuaninenucleotide-bindingproteinsubunitgammaOS=HomosapiensGN=GNG2PE=1SV=1	sp|P59768|GBG2_HUMANGuaninenucleotide-bindingproteinG(I)/G(S)/G(O)subunitgamma-2OS=HomosapiensGN=GNG2PE=1SV=2;tr|G3V3J9|G3V3J9_HUMANGuaninenucleotide-bindingproteinsubunitgammaOS=HomosapiensGN=GNG2PE=1SV=1;tr|G3V2N0|G3V2N0_HUMANGuaninenucleotide-bindingproteinsubunitgammaOS=HomosapiensGN=GNG2PE=1SV=1	1;1;1	1;1;1	1;1;1	;;	3	1	1	1	0	0	0	0	0	0	0	0	0	0	1	0	0	0	0	0	0	0	0	0	0	0	0	0	0	0	0	0	0	0	0	1	0	0	0	0	0	0	0	0
tr|H0YFX2|H0YFX2_HUMANDnaJhomologsubfamilyBmember13(Fragment)OS=HomosapiensGN=DNAJB13PE=1SV=1;sp|P59910|DJB13_HUMANDnaJhomologsubfamilyBmember13OS=HomosapiensGN=DNAJB13PE=1SV=1	tr|H0YFX2|H0YFX2_HUMANDnaJhomologsubfamilyBmember13(Fragment)OS=HomosapiensGN=DNAJB13PE=1SV=1;sp|P59910|DJB13_HUMANDnaJhomologsubfamilyBmember13OS=HomosapiensGN=DNAJB13PE=1SV=1	1;1	1;1	1;1	;	2	1	1	1	1	1	1	1	0	1	0	0	1	0	0	0	0	0	0	0	0	0	0	0	0	1	1	1	1	0	1	0	0	1	0	0	0	0	0	0	0	0	0	0
tr|F8WDD7|F8WDD7_HUMANActin-relatedprotein2/3complexsubunit4OS=HomosapiensGN=ARPC4PE=4SV=1;sp|P59998|ARPC4_HUMANActin-relatedprotein2/3complexsubunit4OS=HomosapiensGN=ARPC4PE=1SV=3;tr|F8WCF6|F8WCF6_HUMANActin-relatedprotein2/3complexsubunit4OS=HomosapiensGN=ARPC4-TTLL3PE=3SV=1;tr|A0A0A6YYG9|A0A0A6YYG9_HUMANProteinARPC4-TTLL3OS=HomosapiensGN=ARPC4-TTLL3PE=4SV=1;tr|H7C0A3|H7C0A3_HUMANARPC4-TTLL3rea…	tr|F8WDD7|F8WDD7_HUMANActin-relatedprotein2/3complexsubunit4OS=HomosapiensGN=ARPC4PE=4SV=1;sp|P59998|ARPC4_HUMANActin-relatedprotein2/3complexsubunit4OS=HomosapiensGN=ARPC4PE=1SV=3;tr|F8WCF6|F8WCF6_HUMANActin-relatedprotein2/3complexsubunit4OS=HomosapiensGN=ARPC4-TTLL3PE=3SV=1;tr|A0A0A6YYG9|A0A0A6YYG9_HUMANProteinARPC4-TTLL3OS=HomosapiensGN=ARPC4-TTLL3PE=4SV=1;tr|H7C0A3|H7C0A3_HUMANARPC4-TTLL3rea…	4;4;4;4;2;1;1;1	4;4;4;4;2;1;1;1	4;4;4;4;2;1;1;1	;;;;	8	4	4	4	4	1	4	4	2	4	4	0	3	3	0	1	1	3	0	2	1	0	0	0	0	4	1	4	4	2	4	4	0	3	3	0	1	1	3	0	2	1	0	0
tr|E9PJK1|E9PJK1_HUMANTetraspaninOS=HomosapiensGN=CD81PE=1SV=1;tr|E9PRJ8|E9PRJ8_HUMANTetraspanin(Fragment)OS=HomosapiensGN=CD81PE=1SV=1;tr|H0YDL9|H0YDL9_HUMANTetraspanin(Fragment)OS=HomosapiensGN=CD81PE=1SV=1;tr|H0YDJ9|H0YDJ9_HUMANTetraspanin(Fragment)OS=HomosapiensGN=CD81PE=1SV=1;sp|P60033|CD81_HUMANCD81antigenOS=HomosapiensGN=CD81PE=1SV=1;tr|E9PIF1|E9PIF1_HUMANTetraspaninOS=HomosapiensGN=CD81PE…	tr|E9PJK1|E9PJK1_HUMANTetraspaninOS=HomosapiensGN=CD81PE=1SV=1;tr|E9PRJ8|E9PRJ8_HUMANTetraspanin(Fragment)OS=HomosapiensGN=CD81PE=1SV=1;tr|H0YDL9|H0YDL9_HUMANTetraspanin(Fragment)OS=HomosapiensGN=CD81PE=1SV=1;tr|H0YDJ9|H0YDJ9_HUMANTetraspanin(Fragment)OS=HomosapiensGN=CD81PE=1SV=1;sp|P60033|CD81_HUMANCD81antigenOS=HomosapiensGN=CD81PE=1SV=1;tr|E9PIF1|E9PIF1_HUMANTetraspaninOS=HomosapiensGN=CD81PE…	3;3;3;3;3;3;3;1	3;3;3;3;3;3;3;1	2;2;2;2;2;2;2;0	;;;;;;	8	3	3	2	1	1	1	1	1	1	1	0	1	1	1	1	0	1	0	2	2	0	0	0	0	1	1	1	1	1	1	1	0	1	1	1	1	0	1	0	2	2	0	0
sp|P60174|TPIS_HUMANTriosephosphateisomeraseOS=HomosapiensGN=TPI1PE=1SV=3;tr|U3KPZ0|U3KPZ0_HUMANTriosephosphateisomerase(Fragment)OS=HomosapiensGN=TPI1PE=1SV=1;tr|U3KQF3|U3KQF3_HUMANTriosephosphateisomerase(Fragment)OS=HomosapiensGN=TPI1PE=1SV=1;tr|U3KPS5|U3KPS5_HUMANTriosephosphateisomerase(Fragment)OS=HomosapiensGN=TPI1PE=1SV=8	sp|P60174|TPIS_HUMANTriosephosphateisomeraseOS=HomosapiensGN=TPI1PE=1SV=3;tr|U3KPZ0|U3KPZ0_HUMANTriosephosphateisomerase(Fragment)OS=HomosapiensGN=TPI1PE=1SV=1	7;4;3;2	7;4;3;2	7;4;3;2	;	4	7	7	7	2	2	2	2	2	4	3	1	2	2	1	1	0	3	1	2	1	0	1	0	1	2	2	2	2	2	4	3	1	2	2	1	1	0	3	1	2	1	0	1
sp|P60201|MYPR_HUMANMyelinproteolipidproteinOS=HomosapiensGN=PLP1PE=1SV=2	sp|P60201|MYPR_HUMANMyelinproteolipidproteinOS=HomosapiensGN=PLP1PE=1SV=2	1	1	1		1	1	1	1	0	0	0	0	0	0	0	0	0	0	0	0	0	0	0	1	1	0	0	0	0	0	0	0	0	0	0	0	0	0	0	0	0	0	0	0	1	1	0	0
tr|E5RIT4|E5RIT4_HUMANEukaryotictranslationinitiationfactor3subunitE(Fragment)OS=HomosapiensGN=EIF3EPE=1SV=1;tr|H0YBR5|H0YBR5_HUMANEukaryotictranslationinitiationfactor3subunitE(Fragment)OS=HomosapiensGN=EIF3EPE=1SV=1;sp|P60228|EIF3E_HUMANEukaryotictranslationinitiationfactor3subunitEOS=HomosapiensGN=EIF3EPE=1SV=1	tr|E5RIT4|E5RIT4_HUMANEukaryotictranslationinitiationfactor3subunitE(Fragment)OS=HomosapiensGN=EIF3EPE=1SV=1;tr|H0YBR5|H0YBR5_HUMANEukaryotictranslationinitiationfactor3subunitE(Fragment)OS=HomosapiensGN=EIF3EPE=1SV=1;sp|P60228|EIF3E_HUMANEukaryotictranslationinitiationfactor3subunitEOS=HomosapiensGN=EIF3EPE=1SV=1	1;1;1	1;1;1	1;1;1	;;	3	1	1	1	0	0	0	0	0	0	0	0	0	0	0	1	0	1	0	1	1	0	0	0	0	0	0	0	0	0	0	0	0	0	0	0	1	0	1	0	1	1	0	0
sp|P60468|SC61B_HUMANProteintransportproteinSec61subunitbetaOS=HomosapiensGN=SEC61BPE=1SV=2	sp|P60468|SC61B_HUMANProteintransportproteinSec61subunitbetaOS=HomosapiensGN=SEC61BPE=1SV=2	1	1	1		1	1	1	1	0	0	0	0	0	0	0	0	0	0	1	1	0	1	0	0	0	0	0	0	0	0	0	0	0	0	0	0	0	0	0	1	1	0	1	0	0	0	0	0
tr|F8W1R7|F8W1R7_HUMANMyosinlightpolypeptide6OS=HomosapiensGN=MYL6PE=1SV=1;sp|P60660|MYL6_HUMANMyosinlightpolypeptide6OS=HomosapiensGN=MYL6PE=1SV=2;tr|G3V1V0|G3V1V0_HUMANMyosinlightpolypeptide6OS=HomosapiensGN=MYL6PE=1SV=1;tr|G3V1Y7|G3V1Y7_HUMANMyosinlightpolypeptide6OS=HomosapiensGN=MYL6PE=1SV=1;tr|J3KND3|J3KND3_HUMANMyosinlightpolypeptide6OS=HomosapiensGN=MYL6PE=1SV=1;tr|G8JLA2|G8JLA2_HUMANMyos…	tr|F8W1R7|F8W1R7_HUMANMyosinlightpolypeptide6OS=HomosapiensGN=MYL6PE=1SV=1;sp|P60660|MYL6_HUMANMyosinlightpolypeptide6OS=HomosapiensGN=MYL6PE=1SV=2;tr|G3V1V0|G3V1V0_HUMANMyosinlightpolypeptide6OS=HomosapiensGN=MYL6PE=1SV=1;tr|G3V1Y7|G3V1Y7_HUMANMyosinlightpolypeptide6OS=HomosapiensGN=MYL6PE=1SV=1;tr|J3KND3|J3KND3_HUMANMyosinlightpolypeptide6OS=HomosapiensGN=MYL6PE=1SV=1;tr|G8JLA2|G8JLA2_HUMANMyos…	6;6;6;5;5;5;5;4;3;3;2;1;1;1	6;6;6;5;5;5;5;4;3;3;2;1;1;1	6;6;6;5;5;5;5;4;3;3;2;1;1;1	;;;;;;;;;	14	6	6	6	6	5	6	4	3	4	2	0	4	3	4	4	4	4	0	3	2	0	1	1	0	6	5	6	4	3	4	2	0	4	3	4	4	4	4	0	3	2	0	1
sp|P60709|ACTB_HUMANActin,cytoplasmic1OS=HomosapiensGN=ACTBPE=1SV=1;tr|G5E9R0|G5E9R0_HUMANActin,cytoplasmic1OS=HomosapiensGN=ACTBPE=1SV=1;tr|E7EVS6|E7EVS6_HUMANActin,cytoplasmic1(Fragment)OS=HomosapiensGN=ACTBPE=1SV=8;tr|C9JZR7|C9JZR7_HUMANActin,cytoplasmic1(Fragment)OS=HomosapiensGN=ACTBPE=1SV=8;tr|C9JTX5|C9JTX5_HUMANActin,cytoplasmic1(Fragment)OS=HomosapiensGN=ACTBPE=1SV=1;tr|C9JUM1|C9JUM1_HUMA…	sp|P60709|ACTB_HUMANActin,cytoplasmic1OS=HomosapiensGN=ACTBPE=1SV=1	43;16;16;13;12;11;9;4	43;16;16;13;12;11;9;4	2;2;2;2;2;0;0;0		8	43	43	2	24	19	28	30	21	40	37	20	34	28	18	20	16	25	13	31	24	15	13	13	4	24	19	28	30	21	40	37	20	34	28	18	20	16	25	13	31	24	15	13
sp|P60842|IF4A1_HUMANEukaryoticinitiationfactor4A-IOS=HomosapiensGN=EIF4A1PE=1SV=1;tr|J3KT12|J3KT12_HUMANEukaryoticinitiationfactor4A-IOS=HomosapiensGN=EIF4A1PE=1SV=1;tr|J3KTB5|J3KTB5_HUMANEukaryoticinitiationfactor4A-I(Fragment)OS=HomosapiensGN=EIF4A1PE=1SV=1;tr|J3QL43|J3QL43_HUMANEukaryoticinitiationfactor4A-I(Fragment)OS=HomosapiensGN=EIF4A1PE=1SV=1;tr|J3QS69|J3QS69_HUMANEukaryoticinitiationfa…	sp|P60842|IF4A1_HUMANEukaryoticinitiationfactor4A-IOS=HomosapiensGN=EIF4A1PE=1SV=1;tr|J3KT12|J3KT12_HUMANEukaryoticinitiationfactor4A-IOS=HomosapiensGN=EIF4A1PE=1SV=1;tr|J3KTB5|J3KTB5_HUMANEukaryoticinitiationfactor4A-I(Fragment)OS=HomosapiensGN=EIF4A1PE=1SV=1;tr|J3QL43|J3QL43_HUMANEukaryoticinitiationfactor4A-I(Fragment)OS=HomosapiensGN=EIF4A1PE=1SV=1;tr|J3QS69|J3QS69_HUMANEukaryoticinitiationfa…	16;14;12;12;12;10;10;8;7;7;6;2;2;2;2;2;1;1;1;1	16;14;12;12;12;10;10;8;7;7;6;2;2;2;2;2;1;1;1;1	7;6;5;4;5;4;5;2;2;2;3;1;0;0;0;0;0;0;0;0	;;;;;;;	20	16	16	7	9	5	7	10	1	8	6	2	8	5	2	4	6	6	0	3	1	1	0	1	0	9	5	7	10	1	8	6	2	8	5	2	4	6	6	0	3	1	1	0
sp|P60866|RS20_HUMAN40SribosomalproteinS20OS=HomosapiensGN=RPS20PE=1SV=1;tr|E5RIP1|E5RIP1_HUMAN40SribosomalproteinS20OS=HomosapiensGN=RPS20PE=1SV=1;tr|E5RJX2|E5RJX2_HUMAN40SribosomalproteinS20OS=HomosapiensGN=RPS20PE=1SV=1;tr|G3XAN0|G3XAN0_HUMAN40SribosomalproteinS20OS=HomosapiensGN=RPS20PE=1SV=1	sp|P60866|RS20_HUMAN40SribosomalproteinS20OS=HomosapiensGN=RPS20PE=1SV=1;tr|E5RIP1|E5RIP1_HUMAN40SribosomalproteinS20OS=HomosapiensGN=RPS20PE=1SV=1;tr|E5RJX2|E5RJX2_HUMAN40SribosomalproteinS20OS=HomosapiensGN=RPS20PE=1SV=1	3;2;2;1	3;2;2;1	3;2;2;1	;;	4	3	3	3	1	0	1	2	0	1	1	0	2	1	0	1	3	2	0	1	1	0	0	0	0	1	0	1	2	0	1	1	0	2	1	0	1	3	2	0	1	1	0	0
tr|G3V295|G3V295_HUMANProteasomesubunitalphatypeOS=HomosapiensGN=PSMA6PE=1SV=1;sp|P60900|PSA6_HUMANProteasomesubunitalphatype-6OS=HomosapiensGN=PSMA6PE=1SV=1;tr|G3V5Z7|G3V5Z7_HUMANProteasomesubunitalphatypeOS=HomosapiensGN=PSMA6PE=1SV=1;tr|G3V3U4|G3V3U4_HUMANProteasomesubunitalphatypeOS=HomosapiensGN=PSMA6PE=1SV=1;tr|G3V3I1|G3V3I1_HUMANProteasomesubunitalphatypeOS=HomosapiensGN=PSMA6PE=1SV=1;tr|G…	tr|G3V295|G3V295_HUMANProteasomesubunitalphatypeOS=HomosapiensGN=PSMA6PE=1SV=1;sp|P60900|PSA6_HUMANProteasomesubunitalphatype-6OS=HomosapiensGN=PSMA6PE=1SV=1;tr|G3V5Z7|G3V5Z7_HUMANProteasomesubunitalphatypeOS=HomosapiensGN=PSMA6PE=1SV=1;tr|G3V3U4|G3V3U4_HUMANProteasomesubunitalphatypeOS=HomosapiensGN=PSMA6PE=1SV=1;tr|G3V3I1|G3V3I1_HUMANProteasomesubunitalphatypeOS=HomosapiensGN=PSMA6PE=1SV=1	5;5;5;4;4;1;1	5;5;5;4;4;1;1	5;5;5;4;4;1;1	;;;;	7	5	5	5	1	1	2	2	1	4	3	0	4	2	1	1	1	1	0	1	0	0	0	2	1	1	1	2	2	1	4	3	0	4	2	1	1	1	1	0	1	0	0	0
sp|P60903|S10AA_HUMANProteinS100-A10OS=HomosapiensGN=S100A10PE=1SV=2	sp|P60903|S10AA_HUMANProteinS100-A10OS=HomosapiensGN=S100A10PE=1SV=2	6	6	6		1	6	6	6	4	2	3	3	1	4	2	0	4	3	0	1	2	1	0	1	0	0	0	0	0	4	2	3	3	1	4	2	0	4	3	0	1	2	1	0	1	0	0	0
sp|P60953|CDC42_HUMANCelldivisioncontrolprotein42homologOS=HomosapiensGN=CDC42PE=1SV=2;tr|Q5JYX0|Q5JYX0_HUMANCelldivisioncontrolprotein42homolog(Fragment)OS=HomosapiensGN=CDC42PE=1SV=1;tr|F8WET9|F8WET9_HUMANRho-relatedGTP-bindingproteinRhoQOS=HomosapiensGN=RHOQPE=4SV=1;tr|B1AH79|B1AH79_HUMANRas-relatedC3botulinumtoxinsubstrate2OS=HomosapiensGN=RAC2PE=4SV=1;tr|G3V4H1|G3V4H1_HUMANRho-relatedGTP-bin…	sp|P60953|CDC42_HUMANCelldivisioncontrolprotein42homologOS=HomosapiensGN=CDC42PE=1SV=2;tr|Q5JYX0|Q5JYX0_HUMANCelldivisioncontrolprotein42homolog(Fragment)OS=HomosapiensGN=CDC42PE=1SV=1	5;4;1;1;1;1;1;1	4;3;0;0;0;0;0;0	4;3;0;0;0;0;0;0	;	8	5	4	4	3	2	2	2	2	4	2	0	5	3	0	0	0	1	0	2	1	0	0	0	0	2	1	1	1	2	4	2	0	4	3	0	0	0	1	0	2	1	0	0
sp|P60981|DEST_HUMANDestrinOS=HomosapiensGN=DSTNPE=1SV=3;tr|F6RFD5|F6RFD5_HUMANDestrinOS=HomosapiensGN=DSTNPE=1SV=1	sp|P60981|DEST_HUMANDestrinOS=HomosapiensGN=DSTNPE=1SV=3;tr|F6RFD5|F6RFD5_HUMANDestrinOS=HomosapiensGN=DSTNPE=1SV=1	8;6	6;4	6;4	;	2	8	6	6	4	3	3	3	0	7	4	0	3	2	2	2	0	5	0	1	0	0	0	0	0	4	3	3	3	0	5	3	0	3	2	2	2	0	4	0	1	0	0	0
sp|P61006|RAB8A_HUMANRas-relatedproteinRab-8AOS=HomosapiensGN=RAB8APE=1SV=1;tr|H0YMN7|H0YMN7_HUMANRas-relatedproteinRab-8BOS=HomosapiensGN=RAB8BPE=1SV=1;sp|P51153|RAB13_HUMANRas-relatedproteinRab-13OS=HomosapiensGN=RAB13PE=1SV=1	sp|P61006|RAB8A_HUMANRas-relatedproteinRab-8AOS=HomosapiensGN=RAB8APE=1SV=1;tr|H0YMN7|H0YMN7_HUMANRas-relatedproteinRab-8BOS=HomosapiensGN=RAB8BPE=1SV=1;sp|P51153|RAB13_HUMANRas-relatedproteinRab-13OS=HomosapiensGN=RAB13PE=1SV=1	4;3;2	1;0;0	1;0;0	;;	3	4	1	1	1	1	3	1	0	2	1	0	2	1	3	2	0	2	0	1	0	1	0	1	0	0	0	1	0	0	0	0	0	0	0	1	0	0	1	0	0	0	0	0
sp|P61019|RAB2A_HUMANRas-relatedproteinRab-2AOS=HomosapiensGN=RAB2APE=1SV=1;tr|H7C125|H7C125_HUMANRas-relatedproteinRab-2A(Fragment)OS=HomosapiensGN=RAB2APE=1SV=1	sp|P61019|RAB2A_HUMANRas-relatedproteinRab-2AOS=HomosapiensGN=RAB2APE=1SV=1;tr|H7C125|H7C125_HUMANRas-relatedproteinRab-2A(Fragment)OS=HomosapiensGN=RAB2APE=1SV=1	2;1	2;1	2;1	;	2	2	2	2	0	0	1	1	0	1	0	0	1	1	1	1	0	2	0	2	0	0	0	0	0	0	0	1	1	0	1	0	0	1	1	1	1	0	2	0	2	0	0	0
sp|P61026|RAB10_HUMANRas-relatedproteinRab-10OS=HomosapiensGN=RAB10PE=1SV=1;tr|H0YLJ8|H0YLJ8_HUMANRas-relatedproteinRab-8BOS=HomosapiensGN=RAB8BPE=4SV=1;tr|H0YL94|H0YL94_HUMANRas-relatedproteinRab-8BOS=HomosapiensGN=RAB8BPE=4SV=1;sp|P59190|RAB15_HUMANRas-relatedproteinRab-15OS=HomosapiensGN=RAB15PE=1SV=1	sp|P61026|RAB10_HUMANRas-relatedproteinRab-10OS=HomosapiensGN=RAB10PE=1SV=1	3;1;1;1	2;0;0;0	2;0;0;0		4	3	2	2	1	2	2	2	0	2	2	0	1	1	1	2	1	2	1	2	0	0	0	1	1	1	1	1	1	0	1	1	0	0	0	1	1	1	1	1	1	0	0	0
tr|D6RAW0|D6RAW0_HUMANUbiquitin-conjugatingenzymeE2D3(Fragment)OS=HomosapiensGN=UBE2D3PE=3SV=1;tr|D6RFM0|D6RFM0_HUMANUbiquitin-conjugatingenzymeE2D2(Fragment)OS=HomosapiensGN=UBE2D2PE=3SV=1;tr|D6RAH7|D6RAH7_HUMANUbiquitin-conjugatingenzymeE2D3OS=HomosapiensGN=UBE2D3PE=1SV=1;tr|H9KV45|H9KV45_HUMANUbiquitin-conjugatingenzymeE2D3OS=HomosapiensGN=UBE2D3PE=1SV=1;tr|A0A0A0MQU3|A0A0A0MQU3_HUMANUbiquitin…	tr|D6RAW0|D6RAW0_HUMANUbiquitin-conjugatingenzymeE2D3(Fragment)OS=HomosapiensGN=UBE2D3PE=3SV=1;tr|D6RFM0|D6RFM0_HUMANUbiquitin-conjugatingenzymeE2D2(Fragment)OS=HomosapiensGN=UBE2D2PE=3SV=1;tr|D6RAH7|D6RAH7_HUMANUbiquitin-conjugatingenzymeE2D3OS=HomosapiensGN=UBE2D3PE=1SV=1;tr|H9KV45|H9KV45_HUMANUbiquitin-conjugatingenzymeE2D3OS=HomosapiensGN=UBE2D3PE=1SV=1;tr|A0A0A0MQU3|A0A0A0MQU3_HUMANUbiquitin…	2;2;2;2;2;2;2;2;1;1;1;1;1	2;2;2;2;2;2;2;2;1;1;1;1;1	2;2;2;2;2;2;2;2;1;1;1;1;1	;;;;;;;;;;;;	13	2	2	2	1	1	1	1	0	1	1	0	1	1	0	0	0	0	0	0	0	0	0	0	0	1	1	1	1	0	1	1	0	1	1	0	0	0	0	0	0	0	0	0
sp|P61088|UBE2N_HUMANUbiquitin-conjugatingenzymeE2NOS=HomosapiensGN=UBE2NPE=1SV=1;tr|F8VSD4|F8VSD4_HUMANUbiquitin-conjugatingenzymeE2NOS=HomosapiensGN=UBE2NPE=1SV=1;tr|F8VV71|F8VV71_HUMANUbiquitin-conjugatingenzymeE2NOS=HomosapiensGN=UBE2NPE=1SV=1;tr|F8VZ29|F8VZ29_HUMANUbiquitin-conjugatingenzymeE2NOS=HomosapiensGN=UBE2NPE=1SV=1;tr|F8VQQ8|F8VQQ8_HUMANUbiquitin-conjugatingenzymeE2NOS=HomosapiensGN…	sp|P61088|UBE2N_HUMANUbiquitin-conjugatingenzymeE2NOS=HomosapiensGN=UBE2NPE=1SV=1;tr|F8VSD4|F8VSD4_HUMANUbiquitin-conjugatingenzymeE2NOS=HomosapiensGN=UBE2NPE=1SV=1;tr|F8VV71|F8VV71_HUMANUbiquitin-conjugatingenzymeE2NOS=HomosapiensGN=UBE2NPE=1SV=1;tr|F8VZ29|F8VZ29_HUMANUbiquitin-conjugatingenzymeE2NOS=HomosapiensGN=UBE2NPE=1SV=1;tr|F8VQQ8|F8VQQ8_HUMANUbiquitin-conjugatingenzymeE2NOS=HomosapiensGN…	4;3;3;2;2;2	4;3;3;2;2;2	4;3;3;2;2;2	;;;;;	6	4	4	4	2	2	3	3	1	1	3	0	2	1	1	2	1	2	1	1	1	0	0	1	0	2	2	3	3	1	1	3	0	2	1	1	2	1	2	1	1	1	0	0
sp|P61106|RAB14_HUMANRas-relatedproteinRab-14OS=HomosapiensGN=RAB14PE=1SV=4;tr|X6RFL8|X6RFL8_HUMANRas-relatedproteinRab-14(Fragment)OS=HomosapiensGN=RAB14PE=1SV=1	sp|P61106|RAB14_HUMANRas-relatedproteinRab-14OS=HomosapiensGN=RAB14PE=1SV=4;tr|X6RFL8|X6RFL8_HUMANRas-relatedproteinRab-14(Fragment)OS=HomosapiensGN=RAB14PE=1SV=1	3;2	3;2	3;2	;	2	3	3	3	1	0	1	0	0	0	0	0	0	0	3	3	0	3	0	0	0	0	0	0	0	1	0	1	0	0	0	0	0	0	0	3	3	0	3	0	0	0	0	0
sp|P61158|ARP3_HUMANActin-relatedprotein3OS=HomosapiensGN=ACTR3PE=1SV=3;tr|B4DXW1|B4DXW1_HUMANActin-relatedprotein3OS=HomosapiensGN=ACTR3PE=1SV=1;tr|F8WDR7|F8WDR7_HUMANActin-relatedprotein3(Fragment)OS=HomosapiensGN=ACTR3PE=1SV=2;tr|F8WEW2|F8WEW2_HUMANActin-relatedprotein3OS=HomosapiensGN=ACTR3PE=1SV=1;tr|F8WE84|F8WE84_HUMANActin-relatedprotein3OS=HomosapiensGN=ACTR3PE=1SV=1;sp|Q9P1U1|ARP3B_HUMAN…	sp|P61158|ARP3_HUMANActin-relatedprotein3OS=HomosapiensGN=ACTR3PE=1SV=3;tr|B4DXW1|B4DXW1_HUMANActin-relatedprotein3OS=HomosapiensGN=ACTR3PE=1SV=1	18;15;3;2;2;2	18;15;3;2;2;2	18;15;3;2;2;2	;	6	18	18	18	13	8	8	9	2	14	9	0	10	8	4	5	3	6	0	3	2	0	0	0	0	13	8	8	9	2	14	9	0	10	8	4	5	3	6	0	3	2	0	0
sp|P61160|ARP2_HUMANActin-relatedprotein2OS=HomosapiensGN=ACTR2PE=1SV=1;tr|F5H6T1|F5H6T1_HUMANARP2actin-relatedprotein2homolog(Yeast),isoformCRA_dOS=HomosapiensGN=ACTR2PE=1SV=2;tr|A0A1B0GWD0|A0A1B0GWD0_HUMANActin-relatedprotein2OS=HomosapiensGN=ACTR2PE=1SV=1;tr|A0A1B0GWH0|A0A1B0GWH0_HUMANActin-relatedprotein2OS=HomosapiensGN=ACTR2PE=1SV=1	sp|P61160|ARP2_HUMANActin-relatedprotein2OS=HomosapiensGN=ACTR2PE=1SV=1;tr|F5H6T1|F5H6T1_HUMANARP2actin-relatedprotein2homolog(Yeast),isoformCRA_dOS=HomosapiensGN=ACTR2PE=1SV=2	17;12;3;3	17;12;3;3	17;12;3;3	;	4	17	17	17	8	10	6	8	4	17	11	0	12	5	3	5	3	7	1	4	1	2	3	2	1	8	10	6	8	4	17	11	0	12	5	3	5	3	7	1	4	1	2	3
sp|P84077|ARF1_HUMANADP-ribosylationfactor1OS=HomosapiensGN=ARF1PE=1SV=2;sp|P61204|ARF3_HUMANADP-ribosylationfactor3OS=HomosapiensGN=ARF3PE=1SV=2;tr|F5H423|F5H423_HUMANUncharacterizedproteinOS=HomosapiensPE=3SV=1;tr|F5H0C7|F5H0C7_HUMANADP-ribosylationfactor3(Fragment)OS=HomosapiensGN=ARF3PE=3SV=1;tr|H0YGG7|H0YGG7_HUMANUncharacterizedprotein(Fragment)OS=HomosapiensPE=4SV=1	sp|P84077|ARF1_HUMANADP-ribosylationfactor1OS=HomosapiensGN=ARF1PE=1SV=2;sp|P61204|ARF3_HUMANADP-ribosylationfactor3OS=HomosapiensGN=ARF3PE=1SV=2;tr|F5H423|F5H423_HUMANUncharacterizedproteinOS=HomosapiensPE=3SV=1	7;7;5;3;2	7;7;5;3;2	5;5;3;1;2	;;	5	7	7	5	6	3	6	6	0	0	0	0	2	3	1	2	2	2	1	1	0	1	0	1	0	6	3	6	6	0	0	0	0	2	3	1	2	2	2	1	1	0	1	0
sp|P61224|RAP1B_HUMANRas-relatedproteinRap-1bOS=HomosapiensGN=RAP1BPE=1SV=1;tr|E7ESV4|E7ESV4_HUMANRas-relatedproteinRap-1b(Fragment)OS=HomosapiensGN=RAP1BPE=1SV=1;tr|F5H7Y6|F5H7Y6_HUMANRas-relatedproteinRap-1bOS=HomosapiensGN=RAP1BPE=1SV=1;tr|F5H6R7|F5H6R7_HUMANRas-relatedproteinRap-1b(Fragment)OS=HomosapiensGN=RAP1BPE=1SV=1;tr|F5H004|F5H004_HUMANRas-relatedproteinRap-1b(Fragment)OS=HomosapiensGN…	sp|P61224|RAP1B_HUMANRas-relatedproteinRap-1bOS=HomosapiensGN=RAP1BPE=1SV=1;tr|E7ESV4|E7ESV4_HUMANRas-relatedproteinRap-1b(Fragment)OS=HomosapiensGN=RAP1BPE=1SV=1;tr|F5H7Y6|F5H7Y6_HUMANRas-relatedproteinRap-1bOS=HomosapiensGN=RAP1BPE=1SV=1;tr|F5H6R7|F5H6R7_HUMANRas-relatedproteinRap-1b(Fragment)OS=HomosapiensGN=RAP1BPE=1SV=1;tr|F5H004|F5H004_HUMANRas-relatedproteinRap-1b(Fragment)OS=HomosapiensGN…	6;5;5;4;4;4;4;4;3;3;3;3;3;3;3;3;3;3;1	6;5;5;4;4;4;4;4;3;3;3;3;3;3;3;3;3;3;1	0;0;0;0;0;0;0;0;0;0;0;0;0;0;0;0;0;0;0	;;;;;;;;;;;;;;;;;	19	6	6	0	4	2	4	4	1	3	3	0	2	3	2	3	3	3	2	3	1	0	1	2	2	4	2	4	4	1	3	3	0	2	3	2	3	3	3	2	3	1	0	1
tr|J3QRI7|J3QRI7_HUMAN60SribosomalproteinL26(Fragment)OS=HomosapiensGN=RPL26PE=4SV=1;tr|J3QQQ9|J3QQQ9_HUMANUncharacterizedproteinOS=HomosapiensPE=4SV=1;tr|J3QQV1|J3QQV1_HUMAN60SribosomalproteinL26OS=HomosapiensGN=RPL26PE=4SV=1;tr|J3QRC4|J3QRC4_HUMAN60SribosomalproteinL26(Fragment)OS=HomosapiensGN=RPL26PE=4SV=1;sp|P61254|RL26_HUMAN60SribosomalproteinL26OS=HomosapiensGN=RPL26PE=1SV=1;tr|J3KTJ8|J3KT…	tr|J3QRI7|J3QRI7_HUMAN60SribosomalproteinL26(Fragment)OS=HomosapiensGN=RPL26PE=4SV=1;tr|J3QQQ9|J3QQQ9_HUMANUncharacterizedproteinOS=HomosapiensPE=4SV=1;tr|J3QQV1|J3QQV1_HUMAN60SribosomalproteinL26OS=HomosapiensGN=RPL26PE=4SV=1;tr|J3QRC4|J3QRC4_HUMAN60SribosomalproteinL26(Fragment)OS=HomosapiensGN=RPL26PE=4SV=1;sp|P61254|RL26_HUMAN60SribosomalproteinL26OS=HomosapiensGN=RPL26PE=1SV=1;tr|J3KTJ8|J3KT…	3;3;3;3;3;2;2;2;1;1	3;3;3;3;3;2;2;2;1;1	3;3;3;3;3;2;2;2;1;1	;;;;;;;	10	3	3	3	1	0	1	0	0	2	1	1	0	0	0	0	1	1	0	0	0	0	0	0	0	1	0	1	0	0	2	1	1	0	0	0	0	1	1	0	0	0	0	0
tr|E7EX53|E7EX53_HUMANRibosomalproteinL15(Fragment)OS=HomosapiensGN=RPL15PE=1SV=1;tr|E7EQV9|E7EQV9_HUMANRibosomalproteinL15(Fragment)OS=HomosapiensGN=RPL15PE=1SV=1;sp|P61313|RL15_HUMAN60SribosomalproteinL15OS=HomosapiensGN=RPL15PE=1SV=2;tr|E7ENU7|E7ENU7_HUMANRibosomalproteinL15(Fragment)OS=HomosapiensGN=RPL15PE=1SV=1;tr|E7ERA2|E7ERA2_HUMANRibosomalproteinL15OS=HomosapiensGN=RPL15PE=1SV=1	tr|E7EX53|E7EX53_HUMANRibosomalproteinL15(Fragment)OS=HomosapiensGN=RPL15PE=1SV=1;tr|E7EQV9|E7EQV9_HUMANRibosomalproteinL15(Fragment)OS=HomosapiensGN=RPL15PE=1SV=1;sp|P61313|RL15_HUMAN60SribosomalproteinL15OS=HomosapiensGN=RPL15PE=1SV=2;tr|E7ENU7|E7ENU7_HUMANRibosomalproteinL15(Fragment)OS=HomosapiensGN=RPL15PE=1SV=1	3;3;3;2;1	3;3;3;2;1	3;3;3;2;1	;;;	5	3	3	3	2	1	1	2	0	2	2	1	1	2	0	1	2	1	0	1	2	0	1	1	0	2	1	1	2	0	2	2	1	1	2	0	1	2	1	0	1	2	0	1
tr|K7ERY7|K7ERY7_HUMAN60SribosomalproteinL27OS=HomosapiensGN=RPL27PE=1SV=1;sp|P61353|RL27_HUMAN60SribosomalproteinL27OS=HomosapiensGN=RPL27PE=1SV=2	tr|K7ERY7|K7ERY7_HUMAN60SribosomalproteinL27OS=HomosapiensGN=RPL27PE=1SV=1;sp|P61353|RL27_HUMAN60SribosomalproteinL27OS=HomosapiensGN=RPL27PE=1SV=2	1;1	1;1	1;1	;	2	1	1	1	0	0	0	0	0	1	0	0	0	1	0	0	0	0	0	0	0	0	0	0	0	0	0	0	0	0	1	0	0	0	1	0	0	0	0	0	0	0	0	0
sp|P61586|RHOA_HUMANTransformingproteinRhoAOS=HomosapiensGN=RHOAPE=1SV=1;tr|Q5JR07|Q5JR07_HUMANRho-relatedGTP-bindingproteinRhoC(Fragment)OS=HomosapiensGN=RHOCPE=1SV=1;tr|C9JNR4|C9JNR4_HUMANTransformingproteinRhoA(Fragment)OS=HomosapiensGN=RHOAPE=1SV=1;tr|E9PQH6|E9PQH6_HUMANRho-relatedGTP-bindingproteinRhoC(Fragment)OS=HomosapiensGN=RHOCPE=1SV=1;tr|C9JX21|C9JX21_HUMANTransformingproteinRhoAOS=Hom…	sp|P61586|RHOA_HUMANTransformingproteinRhoAOS=HomosapiensGN=RHOAPE=1SV=1;tr|Q5JR07|Q5JR07_HUMANRho-relatedGTP-bindingproteinRhoC(Fragment)OS=HomosapiensGN=RHOCPE=1SV=1;tr|C9JNR4|C9JNR4_HUMANTransformingproteinRhoA(Fragment)OS=HomosapiensGN=RHOAPE=1SV=1;tr|E9PQH6|E9PQH6_HUMANRho-relatedGTP-bindingproteinRhoC(Fragment)OS=HomosapiensGN=RHOCPE=1SV=1;tr|C9JX21|C9JX21_HUMANTransformingproteinRhoAOS=Hom…	6;4;4;4;4;4;4;4;3;3;3;3;3;3	6;4;4;4;4;4;4;4;3;3;3;3;3;3	6;4;4;4;4;4;4;4;3;3;3;3;3;3	;;;;;;;;;;;;;	14	6	6	6	3	3	3	3	2	5	3	0	4	3	0	1	1	2	1	3	1	1	1	1	0	3	3	3	3	2	5	3	0	4	3	0	1	1	2	1	3	1	1	1
sp|P61626|LYSC_HUMANLysozymeCOS=HomosapiensGN=LYZPE=1SV=1;tr|F8VV32|F8VV32_HUMANLysozymeCOS=HomosapiensGN=LYZPE=1SV=1;tr|A0A0B4J259|A0A0B4J259_HUMANLysozymeCOS=HomosapiensGN=LYZPE=1SV=1	sp|P61626|LYSC_HUMANLysozymeCOS=HomosapiensGN=LYZPE=1SV=1;tr|F8VV32|F8VV32_HUMANLysozymeCOS=HomosapiensGN=LYZPE=1SV=1;tr|A0A0B4J259|A0A0B4J259_HUMANLysozymeCOS=HomosapiensGN=LYZPE=1SV=1	5;3;3	5;3;3	5;3;3	;;	3	5	5	5	2	2	2	4	1	2	0	0	2	1	0	0	0	1	0	5	4	0	0	0	0	2	2	2	4	1	2	0	0	2	1	0	0	0	1	0	5	4	0	0
sp|P61769|B2MG_HUMANBeta-2-microglobulinOS=HomosapiensGN=B2MPE=1SV=1;tr|H0YLF3|H0YLF3_HUMANBeta-2-microglobulin(Fragment)OS=HomosapiensGN=B2MPE=1SV=1;tr|F5H6I0|F5H6I0_HUMANBeta-2-microglobulinOS=HomosapiensGN=B2MPE=1SV=2	sp|P61769|B2MG_HUMANBeta-2-microglobulinOS=HomosapiensGN=B2MPE=1SV=1;tr|H0YLF3|H0YLF3_HUMANBeta-2-microglobulin(Fragment)OS=HomosapiensGN=B2MPE=1SV=1;tr|F5H6I0|F5H6I0_HUMANBeta-2-microglobulinOS=HomosapiensGN=B2MPE=1SV=2	6;4;4	6;4;4	6;4;4	;;	3	6	6	6	2	2	2	3	0	4	1	0	4	1	2	2	1	2	1	5	6	0	0	0	0	2	2	2	3	0	4	1	0	4	1	2	2	1	2	1	5	6	0	0
[truncated: 449 more rows]
[truncated: 152 more columns]

## Sheet: AllgroupsLFQ
Protein IDs	LFQ intensity 1Y1	LFQ intensity 1Y2	LFQ intensity 1Y3	LFQ intensity 1Y4	LFQ intensity 1Y5	LFQ intensity 1Y6	LFQ intensity 5Y1	LFQ intensity 5Y2	LFQ intensity 5Y3	LFQ intensity 5Y4	LFQ intensity 5Y5	LFQ intensity 10Y1	LFQ intensity 10Y2	LFQ intensity 10Y3	LFQ intensity 10Y4	LFQ intensity ADULT1	LFQ intensity ADULT3	LFQ intensity ADULT4	LFQ intensity ADULT5	LFQ intensity ADULT7	Mean 1-2 yrs	Mean 5-6yrs	Mean 9- 11 yrs	Mean Adult 18+ yrs
[truncated: 1,151 more rows]
