# Supplementary material
Source: HighWire-hosted journal article supplement (https://thorax.bmj.com/content/75/6/449)
Supplement: inline-supplementary-material-6 [file inline-supplementary-material-6.xlsx]

## Sheet: Grp1vs2
Significant Changes Group 1( 1-2yrs) vs Group 2(5-6yrs)
Protein IDs	LFQ intensity 1Y1	LFQ intensity 1Y2	LFQ intensity 1Y3	LFQ intensity 1Y4	LFQ intensity 1Y5	LFQ intensity 1Y6	LFQ intensity 5Y1	LFQ intensity 5Y2	LFQ intensity 5Y3	LFQ intensity 5Y4	LFQ intensity 5Y5	Mean 1yr	Mean 5yr	Ratio	Ttest
sp|Q93077|H2A1C_HUMANHistoneH2Atype1-COS=HomosapiensGN=HIST1H2ACPE=1SV=3;sp|Q7L7L0|H2A3_HUMANHistoneH2Atype3OS=HomosapiensGN=HIST3H2APE=1SV=3;sp|P04908|H2A1B_HUMANHistoneH2Atype1-B/EOS=HomosapiensGN=HIST1H2ABPE=1SV=2	1474500000	1710900000	603840000	922250000	1952300000	867300000	120840000	42887000	197860000	24183000	96479000	1.25518e+09	96449800	0.0768413	0.00101029
sp|P08758|ANXA5_HUMANAnnexinA5OS=HomosapiensGN=ANXA5PE=1SV=2;tr|E9PHT9|E9PHT9_HUMANAnnexinOS=HomosapiensGN=ANXA5PE=1SV=1;tr|D6RBL5|D6RBL5_HUMANAnnexinOS=HomosapiensGN=ANXA5PE=1SV=1;tr|D6RBE9|D6RBE9_HUMANAnnexinOS=HomosapiensGN=ANXA5PE=1SV=1;tr|D6RCN3|D6RCN3_HUMANAnnexinA5OS=HomosapiensGN=ANXA5PE=1SV=1	4527800000	5594900000	5739400000	187420000	3087700000	3971300000	26245000	42323000	44449000	55094000	61395000	3851420000	45901200	0.011918	0.00265303
sp|P12429|ANXA3_HUMANAnnexinA3OS=HomosapiensGN=ANXA3PE=1SV=3;tr|D6RFG5|D6RFG5_HUMANAnnexin(Fragment)OS=HomosapiensGN=ANXA3PE=1SV=1;tr|D6RCA8|D6RCA8_HUMANAnnexin(Fragment)OS=HomosapiensGN=ANXA3PE=1SV=1;tr|D6RAZ8|D6RAZ8_HUMANAnnexin(Fragment)OS=HomosapiensGN=ANXA3PE=1SV=1;tr|D6RFJ9|D6RFJ9_HUMANAnnexinA3(Fragment)OS=HomosapiensGN=ANXA3PE=1SV=1	6523500000	5615000000	2221600000	92101000	5114900000	3442600000	120850000	442350000	11992000	207650000	343570000	3.83495e+09	225282400	0.0587445	0.00886168
sp|P31949|S10AB_HUMANProteinS100-A11OS=HomosapiensGN=S100A11PE=1SV=2	144970000	104510000	40736000	215680000	97402000	97490000	33501000	42122000	30549000	29394000	1	116798000	2.71132e+07	0.232138	0.00942601
sp|P01591|IGJ_HUMANImmunoglobulinJchainOS=HomosapiensGN=JCHAINPE=1SV=4;tr|D6RD17|D6RD17_HUMANImmunoglobulinJchain(Fragment)OS=HomosapiensGN=JCHAINPE=1SV=8;tr|D6RHJ6|D6RHJ6_HUMANImmunoglobulinJchain(Fragment)OS=HomosapiensGN=JCHAINPE=1SV=1;tr|C9JA05|C9JA05_HUMANImmunoglobulinJchain(Fragment)OS=HomosapiensGN=JCHAINPE=1SV=1	99399000	502460000	402650000	1	28987000	1	1837800000	571050000	3019500000	888840000	1089200000	1.72249e+08	1481278000	8.59962	0.0106044
sp|P13498|CY24A_HUMANCytochromeb-245lightchainOS=HomosapiensGN=CYBAPE=1SV=3	18053000	3810100	25780000	1	27768000	1	758170000	307070000	59677000	405980000	178230000	12568517	341825400	27.197	0.0137711
sp|P62328|TYB4_HUMANThymosinbeta-4OS=HomosapiensGN=TMSB4XPE=1SV=2	1	1	18485000	1	1	46390000	70080000	47577000	60476000	63518000	188350000	1.08125e+07	86000200	7.95378	0.0143404
sp|P19105|ML12A_HUMANMyosinregulatorylightchain12AOS=HomosapiensGN=MYL12APE=1SV=2;sp|O14950|ML12B_HUMANMyosinregulatorylightchain12BOS=HomosapiensGN=MYL12BPE=1SV=2;tr|J3QRS3|J3QRS3_HUMANMyosinregulatorylightchain12AOS=HomosapiensGN=MYL12APE=1SV=1;sp|P24844|MYL9_HUMANMyosinregulatorylightpolypeptide9OS=HomosapiensGN=MYL9PE=1SV=4;tr|J3KTJ1|J3KTJ1_HUMANMyosinregulatorylightchain12A(Fragment)OS=Homos…	1	76992000	1	1	114780000	1	353970000	365210000	46061000	226290000	95552000	3.1962e+07	217416600	6.80235	0.0165219
sp|Q9H1X1|RSPH9_HUMANRadialspokeheadprotein9homologOS=HomosapiensGN=RSPH9PE=1SV=1	1	13406000	4853200	1	1	13139000	26151000	33634000	1	25741000	40227000	5.23303e+06	2.51506e+07	4.80612	0.0171289
tr|Q5JP53|Q5JP53_HUMANTubulinbetachainOS=HomosapiensGN=TUBBPE=1SV=1;sp|P07437|TBB5_HUMANTubulinbetachainOS=HomosapiensGN=TUBBPE=1SV=2;tr|Q5ST81|Q5ST81_HUMANTubulinbetachainOS=HomosapiensGN=TUBBPE=1SV=1;tr|G3V5W4|G3V5W4_HUMANTubulinbeta-3chainOS=HomosapiensGN=TUBB3PE=1SV=1;tr|G3V2R8|G3V2R8_HUMANHCG1983504,isoformCRA_eOS=HomosapiensGN=TUBB3PE=1SV=1;tr|G3V3R4|G3V3R4_HUMANHCG1983504,isoformCRA_cOS=Ho…	147310000	551490000	263400000	173340000	246580000	171100000	68492000	70973000	48874000	98887000	1	258870000	5.74452e+07	0.221908	0.0176814
sp|P19397|CD53_HUMANLeukocytesurfaceantigenCD53OS=HomosapiensGN=CD53PE=1SV=1	1	3442300	1	1	18649000	1	13092000	18144000	6587700	32763000	39177000	3681884	21952740	5.96237	0.0196264
tr|F8W0G4|F8W0G4_HUMANPoly(rC)-bindingprotein2(Fragment)OS=HomosapiensGN=PCBP2PE=1SV=1;tr|F8VZX2|F8VZX2_HUMANPoly(rC)-bindingprotein2OS=HomosapiensGN=PCBP2PE=1SV=1;sp|Q15366|PCBP2_HUMANPoly(rC)-bindingprotein2OS=HomosapiensGN=PCBP2PE=1SV=1;tr|F8VXH9|F8VXH9_HUMANPoly(rC)-bindingprotein2(Fragment)OS=HomosapiensGN=PCBP2PE=1SV=1;tr|F8W1G6|F8W1G6_HUMANPoly(rC)-bindingprotein2(Fragment)OS=HomosapiensGN…	53327000	54642000	21543000	54703000	90186000	52373000	1	35130000	9245200	45335000	1	5.44623e+07	1.7942e+07	0.329439	0.020207
sp|P03973|SLPI_HUMANAntileukoproteinaseOS=HomosapiensGN=SLPIPE=1SV=2	33837000	9823900	1	1	1	1	600450000	668890000	22917000	439130000	41911000	7.27682e+06	354659600	48.7383	0.0203712
sp|P04083|ANXA1_HUMANAnnexinA1OS=HomosapiensGN=ANXA1PE=1SV=2;tr|Q5T3N1|Q5T3N1_HUMANAnnexin(Fragment)OS=HomosapiensGN=ANXA1PE=1SV=1;tr|Q5T3N0|Q5T3N0_HUMANAnnexin(Fragment)OS=HomosapiensGN=ANXA1PE=1SV=1	7918800000	10366000000	2867200000	12798000	6348300000	3004900000	476210000	605250000	10286000	539860000	74165000	5086333000	341154200	0.0670727	0.0222794
sp|Q9BV40|VAMP8_HUMANVesicle-associatedmembraneprotein8OS=HomosapiensGN=VAMP8PE=1SV=1;tr|C9JXZ5|C9JXZ5_HUMANVesicle-associatedmembraneprotein8OS=HomosapiensGN=VAMP8PE=1SV=1;tr|B8ZZT4|B8ZZT4_HUMANVesicle-associatedmembraneprotein8OS=HomosapiensGN=VAMP8PE=1SV=1	1	5144000	1	1	6029800	1	178190000	128520000	14878000	201840000	1	1.8623e+06	1.04686e+08	56.213	0.0227146
sp|P35908|K22E_HUMANKeratin,typeIIcytoskeletal2epidermalOS=HomosapiensGN=KRT2PE=1SV=2;CON__P35908;sp|Q01546|K22O_HUMANKeratin,typeIIcytoskeletal2oralOS=HomosapiensGN=KRT76PE=1SV=2;CON__Q01546;CON__Q6NXH9;sp|Q7Z794|K2C1B_HUMANKeratin,typeIIcytoskeletal1bOS=HomosapiensGN=KRT77PE=1SV=3;CON__Q7Z794;CON__Q9R0H5	63566000	28656000	36309000	1	265470000	70580000	567980000	1432600000	416740000	1060900000	12910000	7.74302e+07	698226000	9.01749	0.0237629
sp|P07237|PDIA1_HUMANProteindisulfide-isomeraseOS=HomosapiensGN=P4HBPE=1SV=3;tr|H0Y3Z3|H0Y3Z3_HUMANProteindisulfide-isomerase(Fragment)OS=HomosapiensGN=P4HBPE=1SV=1;tr|H7BZ94|H7BZ94_HUMANProteindisulfide-isomeraseOS=HomosapiensGN=P4HBPE=1SV=2;tr|I3L398|I3L398_HUMANProteindisulfide-isomerase(Fragment)OS=HomosapiensGN=P4HBPE=1SV=1;tr|I3L4M2|I3L4M2_HUMANProteindisulfide-isomerase(Fragment)OS=Homosap…	63375000	26315000	29378000	1	31512000	39827000	122220000	103460000	6534600	100150000	172060000	3.17345e+07	100884920	3.17903	0.0258775
sp|P02765|FETUA_HUMANAlpha-2-HS-glycoproteinOS=HomosapiensGN=AHSGPE=1SV=1;tr|C9JV77|C9JV77_HUMANAlpha-2-HS-glycoproteinOS=HomosapiensGN=AHSGPE=1SV=1	9334200	21475000	7540600	1	19577000	17536000	448130000	355870000	1022300000	248920000	1	1.25771e+07	4.15044e+08	32.9999	0.0272312
sp|P63104|1433Z_HUMAN14-3-3proteinzeta/deltaOS=HomosapiensGN=YWHAZPE=1SV=1;tr|E7EX29|E7EX29_HUMAN14-3-3proteinzeta/delta(Fragment)OS=HomosapiensGN=YWHAZPE=1SV=1;tr|B0AZS6|B0AZS6_HUMAN14-3-3proteinzeta/deltaOS=HomosapiensGN=YWHAZPE=1SV=1;tr|B7Z2E6|B7Z2E6_HUMAN14-3-3proteinzeta/deltaOS=HomosapiensGN=YWHAZPE=1SV=1;tr|H0YB80|H0YB80_HUMAN14-3-3proteinzeta/delta(Fragment)OS=HomosapiensGN=YWHAZPE=1SV=1;…	83771000	83154000	210760000	1	221070000	46017000	636920000	400550000	145820000	682200000	141010000	1.07462e+08	401300000	3.73434	0.0275717
sp|A0A0B4J1V0|HV315_HUMANImmunoglobulinheavyvariable3-15OS=HomosapiensGN=IGHV3-15PE=3SV=1	1	86626000	6493100	1	5972900	5765300	104810000	104120000	292140000	39478000	94577000	17476217	127025000	7.26845	0.0276282
tr|K7EMS3|K7EMS3_HUMANKeratin,typeIcytoskeletal19(Fragment)OS=HomosapiensGN=KRT19PE=1SV=1	28887000	1	1	1	20610000	13575000	62824000	303360000	141790000	151600000	1	1.0512e+07	1.31915e+08	12.549	0.0279609
sp|Q3ZCM7|TBB8_HUMANTubulinbeta-8chainOS=HomosapiensGN=TUBB8PE=1SV=2;tr|A0A075B736|A0A075B736_HUMANTubulinbetachainOS=HomosapiensGN=TUBB8PE=1SV=1;tr|Q5SQY0|Q5SQY0_HUMANTubulinbetachainOS=HomosapiensGN=TUBB8PE=1SV=1	1	188360000	99336000	158620000	73739000	303310000	1	33147000	1	30021000	1	1.37228e+08	1.26336e+07	0.0920632	0.0285095
sp|P80723|BASP1_HUMANBrainacidsolubleprotein1OS=HomosapiensGN=BASP1PE=1SV=2;tr|U3KQP0|U3KQP0_HUMANBrainacidsolubleprotein1(Fragment)OS=HomosapiensGN=BASP1PE=1SV=8	1	5427700	1	1	8129600	1	1182100000	671920000	1	463860000	131640000	2.25955e+06	4.89904e+08	216.815	0.030019
sp|P01833|PIGR_HUMANPolymericimmunoglobulinreceptorOS=HomosapiensGN=PIGRPE=1SV=4	689240000	1131000000	598520000	1	233120000	483930000	3554000000	3426000000	1184900000	2536200000	48814000	5.22635e+08	2149982800	4.11374	0.0302876
sp|P01717|LV325_HUMANImmunoglobulinlambdavariable3-25OS=HomosapiensGN=IGLV3-25PE=1SV=2	1	1963100	1	1	1	1	25958000	7865700	57284000	11067000	7647400	327184	21964420	67.1317	0.0320065
sp|Q12805|FBLN3_HUMANEGF-containingfibulin-likeextracellularmatrixprotein1OS=HomosapiensGN=EFEMP1PE=1SV=2;tr|A0A0U1RQV3|A0A0U1RQV3_HUMANEGF-containingfibulin-likeextracellularmatrixprotein1(Fragment)OS=HomosapiensGN=EFEMP1PE=1SV=1;tr|C9JQX7|C9JQX7_HUMANEGF-containingfibulin-likeextracellularmatrixprotein1(Fragment)OS=HomosapiensGN=EFEMP1PE=1SV=1;tr|C9J4J8|C9J4J8_HUMANEGF-containingfibulin-likeext…	1	3820100	6795900	1	1	1	16707000	23882000	11859000	47554000	1	1769334	2.00004e+07	11.3039	0.0332299
sp|P05090|APOD_HUMANApolipoproteinDOS=HomosapiensGN=APODPE=1SV=1;tr|C9JF17|C9JF17_HUMANApolipoproteinD(Fragment)OS=HomosapiensGN=APODPE=1SV=1;tr|C9JX71|C9JX71_HUMANApolipoproteinD(Fragment)OS=HomosapiensGN=APODPE=1SV=1;tr|F8WBT9|F8WBT9_HUMANApolipoproteinDOS=HomosapiensGN=APODPE=1SV=1	5936700	1	1	1	6636400	1	30898000	73591000	20027000	23557000	1	2.09552e+06	2.96146e+07	14.1324	0.0343304
tr|J3QQN1|J3QQN1_HUMANProteasomesubunitbetatype-10(Fragment)OS=HomosapiensGN=PSMB10PE=1SV=1;sp|P40306|PSB10_HUMANProteasomesubunitbetatype-10OS=HomosapiensGN=PSMB10PE=1SV=1;tr|J3QL48|J3QL48_HUMANUncharacterizedprotein(Fragment)OS=HomosapiensPE=4SV=1	1	2256700	1	1	2486500	1	35616000	26361000	1	24179000	1	790534	1.72312e+07	21.7969	0.034482
tr|K7ERI9|K7ERI9_HUMANApolipoproteinC-I(Fragment)OS=HomosapiensGN=APOC1PE=1SV=1;sp|P02654|APOC1_HUMANApolipoproteinC-IOS=HomosapiensGN=APOC1PE=1SV=1;tr|K7EJI9|K7EJI9_HUMANApolipoproteinC-IOS=HomosapiensGN=APOC1PE=1SV=1;tr|K7ELM9|K7ELM9_HUMANApolipoproteinC-IOS=HomosapiensGN=APOC1PE=1SV=1;tr|K7EPF9|K7EPF9_HUMANApolipoproteinC-IOS=HomosapiensGN=APOC1PE=1SV=1;tr|K7EKP1|K7EKP1_HUMANApolipoproteinC-I(…	1	54351000	1	1	18867000	1	48376000	303770000	321950000	132130000	1	1.2203e+07	1.61245e+08	13.2136	0.0345837
tr|H0Y512|H0Y512_HUMANAdipocyteplasmamembrane-associatedprotein(Fragment)OS=HomosapiensGN=APMAPPE=1SV=1;sp|Q9HDC9|APMAP_HUMANAdipocyteplasmamembrane-associatedproteinOS=HomosapiensGN=APMAPPE=1SV=2	1	43267000	1	1	59635000	33441000	31061000	151060000	56108000	59619000	86210000	2.27238e+07	76811600	3.38022	0.0361653
sp|Q15185|TEBP_HUMANProstaglandinEsynthase3OS=HomosapiensGN=PTGES3PE=1SV=1;tr|A0A087WYT3|A0A087WYT3_HUMANProstaglandinEsynthase3OS=HomosapiensGN=PTGES3PE=1SV=1;tr|B4DDC6|B4DDC6_HUMANProstaglandinEsynthase3OS=HomosapiensGN=PTGES3PE=1SV=1	1	4669200	1	1	3074400	1	1	15252000	5810600	6458100	20604000	1.2906e+06	9.62494e+06	7.45772	0.0384931
sp|P17213|BPI_HUMANBactericidalpermeability-increasingproteinOS=HomosapiensGN=BPIPE=1SV=4;tr|H0Y738|H0Y738_HUMANBactericidalpermeability-increasingproteinOS=HomosapiensGN=BPIPE=1SV=2;tr|A0A0D9SFX6|A0A0D9SFX6_HUMANBactericidalpermeability-increasingproteinOS=HomosapiensGN=BPIPE=1SV=1	18764000	142420000	7856200	1	81562000	1	219150000	220710000	1	137290000	171870000	4.1767e+07	1.49804e+08	3.58666	0.0400012
tr|H3BVC8|H3BVC8_HUMANProstasin(Fragment)OS=HomosapiensGN=PRSS8PE=1SV=8;sp|Q16651|PRSS8_HUMANProstasinOS=HomosapiensGN=PRSS8PE=1SV=1	1	3068700	1	1	2422000	1	43199000	39777000	1	21361000	1	915117	2.08674e+07	22.803	0.0418169
tr|F5GZS6|F5GZS6_HUMAN4F2cell-surfaceantigenheavychainOS=HomosapiensGN=SLC3A2PE=1SV=1;sp|P08195|4F2_HUMAN4F2cell-surfaceantigenheavychainOS=HomosapiensGN=SLC3A2PE=1SV=3;tr|J3KPF3|J3KPF3_HUMAN4F2cell-surfaceantigenheavychainOS=HomosapiensGN=SLC3A2PE=1SV=1;tr|F5GZI0|F5GZI0_HUMAN4F2cell-surfaceantigenheavychainOS=HomosapiensGN=SLC3A2PE=1SV=1;tr|H0YFS2|H0YFS2_HUMAN4F2cell-surfaceantigenheavychain(Fra…	1	1	11832000	1	1	16658000	36094000	61043000	8248100	60037000	1	4748334	3.30844e+07	6.96758	0.0419564
sp|P0DOY3|IGLC3_HUMANImmunoglobulinlambdaconstant3OS=HomosapiensGN=IGLC3PE=1SV=1	164960000	164950000	94164000	1	165160000	7068100	835350000	1377300000	3926200000	1331400000	27327000	9.93837e+07	1499515400	15.0881	0.0419577
sp|P61769|B2MG_HUMANBeta-2-microglobulinOS=HomosapiensGN=B2MPE=1SV=1;tr|H0YLF3|H0YLF3_HUMANBeta-2-microglobulin(Fragment)OS=HomosapiensGN=B2MPE=1SV=1;tr|F5H6I0|F5H6I0_HUMANBeta-2-microglobulinOS=HomosapiensGN=B2MPE=1SV=2	1	18761000	10866000	1	11167000	81559000	117610000	226010000	43840000	289530000	11591000	20392167	137716200	6.75339	0.0426785
tr|A0A087WVV1|A0A087WVV1_HUMANProteasomesubunitbetatype-2OS=HomosapiensGN=PSMB2PE=1SV=1;sp|P49721|PSB2_HUMANProteasomesubunitbetatype-2OS=HomosapiensGN=PSMB2PE=1SV=1	1	5020400	1	1	12198000	1	26798000	23480000	6700700	44131000	1	2869734	2.02219e+07	7.04663	0.0435272
sp|P04264|K2C1_HUMANKeratin,typeIIcytoskeletal1OS=HomosapiensGN=KRT1PE=1SV=6;CON__P04264	802950000	331560000	60386000	64364000	1625000000	609660000	2044100000	7951400000	2562500000	4583700000	103800000	582320000	3449100000	5.92303	0.0449579
sp|P31946|1433B_HUMAN14-3-3proteinbeta/alphaOS=HomosapiensGN=YWHABPE=1SV=3;tr|Q4VY20|Q4VY20_HUMAN14-3-3proteinbeta/alpha(Fragment)OS=HomosapiensGN=YWHABPE=1SV=1;tr|Q4VY19|Q4VY19_HUMAN14-3-3proteinbeta/alpha(Fragment)OS=HomosapiensGN=YWHABPE=1SV=1;tr|A0A0J9YWE8|A0A0J9YWE8_HUMAN14-3-3proteinbeta/alphaOS=HomosapiensGN=YWHABPE=1SV=1;tr|A0A0J9YWZ2|A0A0J9YWZ2_HUMAN14-3-3proteinbeta/alpha(Fragment)OS=Ho…	10511000	5891600	34623000	1	12170000	1	115830000	231430000	15771000	355670000	20837000	1.05326e+07	147907600	14.0428	0.0450264
sp|P40227|TCPZ_HUMANT-complexprotein1subunitzetaOS=HomosapiensGN=CCT6APE=1SV=3	19987000	83154000	36893000	1	60910000	26706000	20064000	1	1	8323100	1	3.79417e+07	5.67742e+06	0.149636	0.045931
tr|C9JS50|C9JS50_HUMANMetalloreductaseSTEAP4OS=HomosapiensGN=STEAP4PE=1SV=1;sp|Q687X5|STEA4_HUMANMetalloreductaseSTEAP4OS=HomosapiensGN=STEAP4PE=1SV=1	1	12550000	18801000	1	1	1	62046000	22306000	1	29960000	24003000	5.22517e+06	2.7663e+07	5.29418	0.0472245
sp|P84095|RHOG_HUMANRho-relatedGTP-bindingproteinRhoGOS=HomosapiensGN=RHOGPE=1SV=1	1	11889000	1	1	14541000	1	207140000	90964000	10966000	97956000	1	4.405e+06	8.14052e+07	18.4802	0.0485757
sp|P15144|AMPN_HUMANAminopeptidaseNOS=HomosapiensGN=ANPEPPE=1SV=4;tr|H0YLZ8|H0YLZ8_HUMANAminopeptidaseN(Fragment)OS=HomosapiensGN=ANPEPPE=1SV=1	1	13648000	1	1	9127100	1	51035000	57019000	2584200	94719000	1	3.79585e+06	4.10714e+07	10.8201	0.0488691
sp|P06727|APOA4_HUMANApolipoproteinA-IVOS=HomosapiensGN=APOA4PE=1SV=3;CON__Q32PJ2	40466000	92965000	9060900	1	56135000	24096000	723740000	414640000	2123300000	610190000	1	3.71205e+07	7.74374e+08	20.8611	0.0491822
sp|Q07954|LRP1_HUMANProlow-densitylipoproteinreceptor-relatedprotein1OS=HomosapiensGN=LRP1PE=1SV=2;tr|Q6PJ72|Q6PJ72_HUMANLRP1proteinOS=HomosapiensGN=LRP1PE=1SV=1	1	1	48722000	1	69179000	88153000	137970000	288950000	1148200000	1020000000	1	3.43423e+07	5.19024e+08	15.1132	0.0496259
sp|Q15582|BGH3_HUMANTransforminggrowthfactor-beta-inducedproteinig-h3OS=HomosapiensGN=TGFBIPE=1SV=1;tr|H0Y8L3|H0Y8L3_HUMANTransforminggrowthfactor-beta-inducedproteinig-h3(Fragment)OS=HomosapiensGN=TGFBIPE=1SV=1;tr|S4R3C6|S4R3C6_HUMANTransforminggrowthfactor-beta-inducedproteinig-h3(Fragment)OS=HomosapiensGN=TGFBIPE=1SV=1;tr|H0Y9D7|H0Y9D7_HUMANTransforminggrowthfactor-beta-inducedproteinig-h3(Fra…	1	10645000	6221900	1	22983000	1	81580000	36796000	12604000	70871000	1	6.64165e+06	4.03702e+07	6.07834	0.0500174

## Sheet: Grp1vs3
Significant Changes Group 1( 1-2yrs) vs Group 3 (8-11yrs)
Protein IDs	LFQ intensity 1Y1	LFQ intensity 1Y2	LFQ intensity 1Y3	LFQ intensity 1Y4	LFQ intensity 1Y5	LFQ intensity 1Y6	LFQ intensity 10Y1	LFQ intensity 10Y2	LFQ intensity 10Y3	LFQ intensity 10Y4	Mean1yr	Mean 10 yr	Ratio	Ttest
sp|P80723|BASP1_HUMANBrainacidsolubleprotein1OS=HomosapiensGN=BASP1PE=1SV=2;tr|U3KQP0|U3KQP0_HUMANBrainacidsolubleprotein1(Fragment)OS=HomosapiensGN=BASP1PE=1SV=8	1	5427700	1	1	8129600	1	101340000	71157000	83308000	88685000	2.25955e+06	86122500	38.1149	2.46541e-07
tr|F5GZS6|F5GZS6_HUMAN4F2cell-surfaceantigenheavychainOS=HomosapiensGN=SLC3A2PE=1SV=1;sp|P08195|4F2_HUMAN4F2cell-surfaceantigenheavychainOS=HomosapiensGN=SLC3A2PE=1SV=3;tr|J3KPF3|J3KPF3_HUMAN4F2cell-surfaceantigenheavychainOS=HomosapiensGN=SLC3A2PE=1SV=1;tr|F5GZI0|F5GZI0_HUMAN4F2cell-surfaceantigenheavychainOS=HomosapiensGN=SLC3A2PE=1SV=1;tr|H0YFS2|H0YFS2_HUMAN4F2cell-surfaceantigenheavychain(Fra…	1	1	11832000	1	1	16658000	60269000	49690000	49815000	50641000	4748334	52603750	11.0784	4.04995e-06
sp|P35247|SFTPD_HUMANPulmonarysurfactant-associatedproteinDOS=HomosapiensGN=SFTPDPE=1SV=3;tr|Q5T0M2|Q5T0M2_HUMANPulmonarysurfactant-associatedproteinD(Fragment)OS=HomosapiensGN=SFTPDPE=4SV=1	1055800000	489020000	818130000	1	1824700000	360060000	10097000000	6776600000	11362000000	9283600000	7.57952e+08	9379800000	12.3752	6.45388e-06
tr|A0A0G2JMB2|A0A0G2JMB2_HUMANImmunoglobulinheavyconstantalpha2(Fragment)OS=HomosapiensGN=IGHA2PE=1SV=1;sp|P01877|IGHA2_HUMANImmunoglobulinheavyconstantalpha2OS=HomosapiensGN=IGHA2PE=1SV=4	147720000	115630000	1	1	62844000	13191000	859160000	1540400000	1234600000	1235300000	56564167	1217365000	21.5218	7.85508e-06
sp|P01833|PIGR_HUMANPolymericimmunoglobulinreceptorOS=HomosapiensGN=PIGRPE=1SV=4	689240000	1131000000	598520000	1	233120000	483930000	7777200000	7542600000	7648700000	11781000000	5.22635e+08	8687375000	16.6223	1.04975e-05
sp|P02747|C1QC_HUMANComplementC1qsubcomponentsubunitCOS=HomosapiensGN=C1QCPE=1SV=3	123750000	37204000	72010000	1	56383000	86015000	262020000	326760000	347820000	303480000	6.25603e+07	310020000	4.95554	1.24562e-05
tr|A0A087WXI2|A0A087WXI2_HUMANIgGFc-bindingproteinOS=HomosapiensGN=FCGBPPE=1SV=1;sp|Q9Y6R7|FCGBP_HUMANIgGFc-bindingproteinOS=HomosapiensGN=FCGBPPE=1SV=3;tr|A0A087WUZ2|A0A087WUZ2_HUMANIgGFc-bindingproteinOS=HomosapiensGN=FCGBPPE=1SV=1	1308600000	1541900000	322030000	1	699220000	82421000	4393800000	4302500000	6189400000	6025500000	6.59029e+08	5227800000	7.93259	2.21774e-05
sp|P21980|TGM2_HUMANProtein-glutaminegamma-glutamyltransferase2OS=HomosapiensGN=TGM2PE=1SV=2;tr|A2A299|A2A299_HUMANProtein-glutaminegamma-glutamyltransferase2(Fragment)OS=HomosapiensGN=TGM2PE=1SV=8;tr|A2A2A0|A2A2A0_HUMANProtein-glutaminegamma-glutamyltransferase2(Fragment)OS=HomosapiensGN=TGM2PE=1SV=8	31641000	314860000	128270000	30365000	279660000	123970000	996310000	833940000	733260000	734850000	151461000	824590000	5.44424	2.73191e-05
sp|P01834|IGKC_HUMANImmunoglobulinkappaconstantOS=HomosapiensGN=IGKCPE=1SV=2	176520000	926970000	294400000	1	534000000	64965000	5192400000	3374200000	3151100000	3252100000	3.32809e+08	3742450000	11.245	4.11221e-05
sp|P80188|NGAL_HUMANNeutrophilgelatinase-associatedlipocalinOS=HomosapiensGN=LCN2PE=1SV=2;tr|X6R8F3|X6R8F3_HUMANNeutrophilgelatinase-associatedlipocalinOS=HomosapiensGN=LCN2PE=1SV=1	281200000	301520000	67257000	1	296360000	60817000	874150000	1588400000	1492700000	1227200000	1.67859e+08	1295612500	7.71846	5.35473e-05
sp|P05546|HEP2_HUMANHeparincofactor2OS=HomosapiensGN=SERPIND1PE=1SV=3;CON__ENSEMBL:ENSBTAP00000018574	68630000	36792000	21371000	1	137070000	45428000	303790000	225600000	294320000	342490000	5.15485e+07	291550000	5.65584	5.61027e-05
sp|P10909|CLUS_HUMANClusterinOS=HomosapiensGN=CLUPE=1SV=1;tr|E7ERK6|E7ERK6_HUMANClusterin(Fragment)OS=HomosapiensGN=CLUPE=1SV=1;tr|H0YLK8|H0YLK8_HUMANClusterin(Fragment)OS=HomosapiensGN=CLUPE=1SV=1;tr|E7ETB4|E7ETB4_HUMANClusterin(Fragment)OS=HomosapiensGN=CLUPE=1SV=1;tr|E5RJZ5|E5RJZ5_HUMANClusterin(Fragment)OS=HomosapiensGN=CLUPE=1SV=1;tr|H0YC35|H0YC35_HUMANClusterin(Fragment)OS=HomosapiensGN=CLU…	377100000	626130000	691980000	1	194640000	360610000	1519700000	2045700000	1569400000	1422400000	3.75077e+08	1639300000	4.37057	8.00742e-05
tr|A6NNI4|A6NNI4_HUMANTetraspaninOS=HomosapiensGN=CD9PE=1SV=1;tr|G8JLH6|G8JLH6_HUMANTetraspanin(Fragment)OS=HomosapiensGN=CD9PE=1SV=1;sp|P21926|CD9_HUMANCD9antigenOS=HomosapiensGN=CD9PE=1SV=4;tr|A0A087WU13|A0A087WU13_HUMANTetraspaninOS=HomosapiensGN=CD9PE=1SV=1	109570000	41276000	29494000	1	118290000	208070000	520750000	731420000	1054800000	1070000000	8.445e+07	844242500	9.99695	0.000141948
sp|P00450|CERU_HUMANCeruloplasminOS=HomosapiensGN=CPPE=1SV=1;tr|E9PFZ2|E9PFZ2_HUMANCeruloplasminOS=HomosapiensGN=CPPE=1SV=1;tr|H7C5R1|H7C5R1_HUMANCeruloplasmin(Fragment)OS=HomosapiensGN=CPPE=1SV=1;tr|D6RE86|D6RE86_HUMANCeruloplasmin(Fragment)OS=HomosapiensGN=CPPE=1SV=8;CON__ENSEMBL:ENSBTAP00000031900;tr|H7C5N5|H7C5N5_HUMANCeruloplasmin(Fragment)OS=HomosapiensGN=CPPE=1SV=1	31909000	337400000	29033000	1	271860000	1	820420000	1299000000	1692800000	1884800000	1.117e+08	1424255000	12.7507	0.000185128
sp|P01591|IGJ_HUMANImmunoglobulinJchainOS=HomosapiensGN=JCHAINPE=1SV=4;tr|D6RD17|D6RD17_HUMANImmunoglobulinJchain(Fragment)OS=HomosapiensGN=JCHAINPE=1SV=8;tr|D6RHJ6|D6RHJ6_HUMANImmunoglobulinJchain(Fragment)OS=HomosapiensGN=JCHAINPE=1SV=1;tr|C9JA05|C9JA05_HUMANImmunoglobulinJchain(Fragment)OS=HomosapiensGN=JCHAINPE=1SV=1	99399000	502460000	402650000	1	28987000	1	3119700000	4928800000	7718700000	7395000000	1.72249e+08	5790550000	33.6173	0.000191307
sp|Q9H1X1|RSPH9_HUMANRadialspokeheadprotein9homologOS=HomosapiensGN=RSPH9PE=1SV=1	1	13406000	4853200	1	1	13139000	33079000	30679000	53917000	39202000	5.23303e+06	39219250	7.49455	0.000204981
sp|P55058|PLTP_HUMANPhospholipidtransferproteinOS=HomosapiensGN=PLTPPE=1SV=1	1	5382500	1	1	7353600	1	24676000	28995000	23966000	47155000	2122684	31198000	14.6974	0.000235464
sp|Q8NCM8|DYHC2_HUMANCytoplasmicdynein2heavychain1OS=HomosapiensGN=DYNC2H1PE=1SV=4	1	6955400	1	1	10811000	1	24940000	16147000	25855000	20274000	2.96107e+06	21804000	7.36356	0.000239649
sp|A0A075B6I0|LV861_HUMANImmunoglobulinlambdavariable8-61OS=HomosapiensGN=IGLV8-61PE=3SV=7	1	10900000	1	1	1	1	61954000	46158000	33283000	25971000	1.81667e+06	41841500	23.032	0.000314466
sp|P05107|ITB2_HUMANIntegrinbeta-2OS=HomosapiensGN=ITGB2PE=1SV=2;tr|J3KNI6|J3KNI6_HUMANIntegrinbeta(Fragment)OS=HomosapiensGN=ITGB2PE=1SV=1;tr|E5RK25|E5RK25_HUMANIntegrinbeta(Fragment)OS=HomosapiensGN=ITGB2PE=1SV=1;tr|E5RIG7|E5RIG7_HUMANIntegrinbeta-2(Fragment)OS=HomosapiensGN=ITGB2PE=1SV=1;tr|E5RHT0|E5RHT0_HUMANIntegrinbeta-2(Fragment)OS=HomosapiensGN=ITGB2PE=1SV=1;tr|E5RFI0|E5RFI0_HUMANIntegrin…	56740000	92843000	18271000	1	342690000	38190000	392560000	679940000	783700000	701780000	9.14557e+07	639495000	6.9924	0.000380262
tr|S4R460|S4R460_HUMANImmunoglobulinheavyvariable3/OR16-9(non-functional)OS=HomosapiensGN=IGHV3OR16-9PE=1SV=2;tr|A0A0B4J2B5|A0A0B4J2B5_HUMANImmunoglobulinheavyvariable3/OR16-9(non-functional)(Fragment)OS=HomosapiensGN=IGHV3OR16-9PE=1SV=1	139710000	278240000	68397000	1	93876000	40583000	764160000	678720000	994130000	424530000	1.03468e+08	715385000	6.91409	0.000406083
sp|P84095|RHOG_HUMANRho-relatedGTP-bindingproteinRhoGOS=HomosapiensGN=RHOGPE=1SV=1	1	11889000	1	1	14541000	1	29516000	39852000	21710000	32413000	4.405e+06	30872750	7.00857	0.000423264
sp|P06310|KV230_HUMANImmunoglobulinkappavariable2-30OS=HomosapiensGN=IGKV2-30PE=3SV=2;sp|A0A075B6S6|KVD30_HUMANImmunoglobulinkappavariable2D-30OS=HomosapiensGN=IGKV2D-30PE=3SV=1;sp|A0A0A0MRZ7|KVD26_HUMANImmunoglobulinkappavariable2D-26OS=HomosapiensGN=IGKV2D-26PE=3SV=1	71444000	27288000	1	1	40306000	1	363090000	137910000	231960000	238840000	2.3173e+07	242950000	10.4842	0.000526385
sp|P0DOY3|IGLC3_HUMANImmunoglobulinlambdaconstant3OS=HomosapiensGN=IGLC3PE=1SV=1	164960000	164950000	94164000	1	165160000	7068100	1773400000	1726900000	3763100000	4012900000	9.93837e+07	2819075000	28.3656	0.000549983
sp|P27348|1433T_HUMAN14-3-3proteinthetaOS=HomosapiensGN=YWHAQPE=1SV=1;tr|E9PG15|E9PG15_HUMAN14-3-3proteintheta(Fragment)OS=HomosapiensGN=YWHAQPE=1SV=1	8017900	12884000	16375000	1	3238400	1	29653000	23917000	27423000	26154000	6.75255e+06	26786750	3.96691	0.000558052
sp|Q96NY7|CLIC6_HUMANChlorideintracellularchannelprotein6OS=HomosapiensGN=CLIC6PE=2SV=3	1	104490000	68079000	1	100270000	1	165650000	254180000	213080000	207580000	4.54732e+07	210122500	4.6208	0.000565945
tr|H3BVC8|H3BVC8_HUMANProstasin(Fragment)OS=HomosapiensGN=PRSS8PE=1SV=8;sp|Q16651|PRSS8_HUMANProstasinOS=HomosapiensGN=PRSS8PE=1SV=1	1	3068700	1	1	2422000	1	16002000	66462000	63479000	51534000	915117	49369250	53.9485	0.000750076
tr|K7ERI9|K7ERI9_HUMANApolipoproteinC-I(Fragment)OS=HomosapiensGN=APOC1PE=1SV=1;sp|P02654|APOC1_HUMANApolipoproteinC-IOS=HomosapiensGN=APOC1PE=1SV=1;tr|K7EJI9|K7EJI9_HUMANApolipoproteinC-IOS=HomosapiensGN=APOC1PE=1SV=1;tr|K7ELM9|K7ELM9_HUMANApolipoproteinC-IOS=HomosapiensGN=APOC1PE=1SV=1;tr|K7EPF9|K7EPF9_HUMANApolipoproteinC-IOS=HomosapiensGN=APOC1PE=1SV=1;tr|K7EKP1|K7EKP1_HUMANApolipoproteinC-I(…	1	54351000	1	1	18867000	1	150210000	111090000	56622000	114620000	1.2203e+07	108135500	8.86139	0.00097256
sp|P28066|PSA5_HUMANProteasomesubunitalphatype-5OS=HomosapiensGN=PSMA5PE=1SV=3	83223000	42387000	22879000	1	63879000	32305000	119670000	99536000	141400000	135170000	4.07788e+07	123944000	3.03942	0.00113243
sp|P31946|1433B_HUMAN14-3-3proteinbeta/alphaOS=HomosapiensGN=YWHABPE=1SV=3;tr|Q4VY20|Q4VY20_HUMAN14-3-3proteinbeta/alpha(Fragment)OS=HomosapiensGN=YWHABPE=1SV=1;tr|Q4VY19|Q4VY19_HUMAN14-3-3proteinbeta/alpha(Fragment)OS=HomosapiensGN=YWHABPE=1SV=1;tr|A0A0J9YWE8|A0A0J9YWE8_HUMAN14-3-3proteinbeta/alphaOS=HomosapiensGN=YWHABPE=1SV=1;tr|A0A0J9YWZ2|A0A0J9YWZ2_HUMAN14-3-3proteinbeta/alpha(Fragment)OS=Ho…	10511000	5891600	34623000	1	12170000	1	78180000	102100000	44143000	55481000	1.05326e+07	69976000	6.64375	0.00116457
sp|P00738|HPT_HUMANHaptoglobinOS=HomosapiensGN=HPPE=1SV=1;tr|J3QR68|J3QR68_HUMANHaptoglobin(Fragment)OS=HomosapiensGN=HPPE=1SV=1;tr|A0A0C4DGL8|A0A0C4DGL8_HUMANHaptoglobinOS=HomosapiensGN=HPPE=1SV=1;tr|J3QLC9|J3QLC9_HUMANHaptoglobin(Fragment)OS=HomosapiensGN=HPPE=1SV=1;tr|A0A087WU08|A0A087WU08_HUMANHaptoglobinOS=HomosapiensGN=HPPE=1SV=1;tr|H3BS21|H3BS21_HUMANHaptoglobin(Fragment)OS=HomosapiensGN=H…	10001000	168590000	10798000	27766000	120070000	21602000	202490000	370970000	244730000	307920000	59804500	281527500	4.70746	0.00117684
sp|P28070|PSB4_HUMANProteasomesubunitbetatype-4OS=HomosapiensGN=PSMB4PE=1SV=4	1	12694000	1	1	11466000	12400000	22134000	40415000	41556000	61340000	6.09333e+06	41361250	6.78795	0.00118902
sp|P03973|SLPI_HUMANAntileukoproteinaseOS=HomosapiensGN=SLPIPE=1SV=2	33837000	9823900	1	1	1	1	153830000	501890000	481650000	239660000	7.27682e+06	344257500	47.3088	0.00123675
sp|A0A075B6K5|LV39_HUMANImmunoglobulinlambdavariable3-9OS=HomosapiensGN=IGLV3-9PE=3SV=1;sp|A0A075B6K2|LV312_HUMANImmunoglobulinlambdavariable3-12OS=HomosapiensGN=IGLV3-12PE=3SV=2	1	52746000	1	1	31923000	1	84685000	184420000	231470000	308970000	1.41115e+07	202386250	14.3419	0.00127934
sp|P63218|GBG5_HUMANGuaninenucleotide-bindingproteinG(I)/G(S)/G(O)subunitgamma-5OS=HomosapiensGN=GNG5PE=1SV=3	1	17956000	43085000	1	1	1	45861000	59791000	60039000	56473000	1.01735e+07	55541000	5.45938	0.00129675
sp|P05362|ICAM1_HUMANIntercellularadhesionmolecule1OS=HomosapiensGN=ICAM1PE=1SV=2;tr|K7EKL8|K7EKL8_HUMANIntercellularadhesionmolecule1(Fragment)OS=HomosapiensGN=ICAM1PE=1SV=1;tr|E7ESS4|E7ESS4_HUMANIntercellularadhesionmolecule1OS=HomosapiensGN=ICAM1PE=1SV=1	13269000	40650000	74629000	1	126450000	95904000	277920000	181130000	451750000	497260000	5.84837e+07	352015000	6.01903	0.00172979
tr|H0YD14|H0YD14_HUMANMyoferlin(Fragment)OS=HomosapiensGN=MYOFPE=1SV=1;sp|Q9NZM1|MYOF_HUMANMyoferlinOS=HomosapiensGN=MYOFPE=1SV=1	1	11752000	1	1	11754000	1	27499000	21545000	16064000	17823000	3.91767e+06	20732750	5.29212	0.00184579
tr|E9PN95|E9PN95_HUMANUteroglobinOS=HomosapiensGN=SCGB1A1PE=1SV=1	299580000	499230000	139690000	1	204210000	171430000	551050000	817140000	1135300000	1455300000	2.19023e+08	989697500	4.51869	0.00243674
tr|F5H100|F5H100_HUMANGuaninenucleotide-bindingproteinG(I)/G(S)/G(T)subunitbeta-3(Fragment)OS=HomosapiensGN=GNB3PE=1SV=2	32910000	18254000	22356000	1	43865000	10094000	44049000	68229000	98972000	85734000	2.12465e+07	74246000	3.4945	0.00263722
sp|A0A0A0MS15|HV349_HUMANImmunoglobulinheavyvariable3-49OS=HomosapiensGN=IGHV3-49PE=3SV=1	1	7124400	1	1	7420500	1	8879500	18408000	12488000	12238000	2.42415e+06	13003375	5.3641	0.00270902
sp|P49788|TIG1_HUMANRetinoicacidreceptorresponderprotein1OS=HomosapiensGN=RARRES1PE=1SV=2	1	2819400	1	1	1928800	1	3078400	17236000	22257000	21046000	791367	15904350	20.0973	0.00273947
sp|P29508|SPB3_HUMANSerpinB3OS=HomosapiensGN=SERPINB3PE=1SV=2;sp|P48594|SPB4_HUMANSerpinB4OS=HomosapiensGN=SERPINB4PE=1SV=2;tr|C9JZ65|C9JZ65_HUMANSerpinB4(Fragment)OS=HomosapiensGN=SERPINB4PE=1SV=1;tr|H0Y5H9|H0Y5H9_HUMANSerpinB4(Fragment)OS=HomosapiensGN=SERPINB4PE=1SV=1	34137000	69181000	22732000	1	74365000	17998000	123100000	180570000	393190000	288700000	3.64022e+07	246390000	6.76855	0.00286385
sp|P49913|CAMP_HUMANCathelicidinantimicrobialpeptideOS=HomosapiensGN=CAMPPE=1SV=1;tr|J3KNB4|J3KNB4_HUMANCathelicidinantimicrobialpeptideOS=HomosapiensGN=CAMPPE=1SV=1	46011000	1	1	1	5687300	24048000	82073000	239490000	147620000	91255000	1.26244e+07	140109500	11.0983	0.00288567
sp|P05164|PERM_HUMANMyeloperoxidaseOS=HomosapiensGN=MPOPE=1SV=1;tr|J3QSF7|J3QSF7_HUMANMyeloperoxidase(Fragment)OS=HomosapiensGN=MPOPE=1SV=8	249460000	1122600000	99700000	1	1108800000	50689000	2305400000	4459000000	9296800000	9228300000	4.38542e+08	6322375000	14.4168	0.00314201
sp|Q9NP55|BPIA1_HUMANBPIfold-containingfamilyAmember1OS=HomosapiensGN=BPIFA1PE=1SV=1	222680000	87567000	1	1	74596000	48164000	171300000	306420000	447070000	358100000	7.21678e+07	320722500	4.44412	0.00389741
tr|J3QQN1|J3QQN1_HUMANProteasomesubunitbetatype-10(Fragment)OS=HomosapiensGN=PSMB10PE=1SV=1;sp|P40306|PSB10_HUMANProteasomesubunitbetatype-10OS=HomosapiensGN=PSMB10PE=1SV=1;tr|J3QL48|J3QL48_HUMANUncharacterizedprotein(Fragment)OS=HomosapiensPE=4SV=1	1	2256700	1	1	2486500	1	4432000	8212000	10182000	3121000	790534	6486750	8.20553	0.00417135		f
sp|Q96E40|SACA9_HUMANSpermacrosome-associatedprotein9OS=HomosapiensGN=SPACA9PE=1SV=1	1	8449600	1	1	9156000	1	20366000	15219000	11119000	10910000	2.93427e+06	14403500	4.90872	0.00430183
sp|O00391|QSOX1_HUMANSulfhydryloxidase1OS=HomosapiensGN=QSOX1PE=1SV=3;tr|A8MXT8|A8MXT8_HUMANSulfhydryloxidase1OS=HomosapiensGN=QSOX1PE=1SV=2	1	22933000	58792000	1	19129000	30180000	174190000	55138000	134580000	89506000	2.1839e+07	113353500	5.19042	0.00446821
tr|A0A0C4DGW3|A0A0C4DGW3_HUMANMucin-1OS=HomosapiensGN=MUC1PE=1SV=1;tr|A0A087X2A4|A0A087X2A4_HUMANMucin-1OS=HomosapiensGN=MUC1PE=1SV=1;sp|P15941|MUC1_HUMANMucin-1OS=HomosapiensGN=MUC1PE=1SV=3;tr|A0A087WWM1|A0A087WWM1_HUMANMucin-1OS=HomosapiensGN=MUC1PE=1SV=1;tr|A0A087WVJ0|A0A087WVJ0_HUMANMucin-1(Fragment)OS=HomosapiensGN=MUC1PE=1SV=1;tr|A0A0A0MSH4|A0A0A0MSH4_HUMANMucin-1OS=HomosapiensGN=MUC1PE=1SV…	406140000	221430000	7777100	1	103120000	42155000	695310000	1571200000	600900000	711140000	1.30104e+08	894637500	6.87634	0.00462063
sp|P01871|IGHM_HUMANImmunoglobulinheavyconstantmuOS=HomosapiensGN=IGHMPE=1SV=4;tr|A0A1B0GUU9|A0A1B0GUU9_HUMANImmunoglobulinheavyconstantmu(Fragment)OS=HomosapiensGN=IGHMPE=1SV=1	906420000	1621000000	115070000	1	440020000	1	4523500000	4632100000	2116500000	1662300000	513751667	3233600000	6.29409	0.00463997
sp|P02765|FETUA_HUMANAlpha-2-HS-glycoproteinOS=HomosapiensGN=AHSGPE=1SV=1;tr|C9JV77|C9JV77_HUMANAlpha-2-HS-glycoproteinOS=HomosapiensGN=AHSGPE=1SV=1	9334200	21475000	7540600	1	19577000	17536000	480060000	259160000	178290000	109850000	1.25771e+07	256840000	20.4212	0.00499372
sp|P15153|RAC2_HUMANRas-relatedC3botulinumtoxinsubstrate2OS=HomosapiensGN=RAC2PE=1SV=1;tr|B1AH77|B1AH77_HUMANRas-relatedC3botulinumtoxinsubstrate2OS=HomosapiensGN=RAC2PE=1SV=1;tr|B1AH80|B1AH80_HUMANRas-relatedC3botulinumtoxinsubstrate2OS=HomosapiensGN=RAC2PE=1SV=1;tr|B1AH78|B1AH78_HUMANRas-relatedC3botulinumtoxinsubstrate2(Fragment)OS=HomosapiensGN=RAC2PE=1SV=1	133750000	269300000	190140000	1	224320000	89537000	396670000	349500000	331490000	317030000	1.51175e+08	348672500	2.30642	0.00510538
tr|E9PNW4|E9PNW4_HUMANCD59glycoproteinOS=HomosapiensGN=CD59PE=1SV=1;sp|P13987|CD59_HUMANCD59glycoproteinOS=HomosapiensGN=CD59PE=1SV=1;tr|E9PR17|E9PR17_HUMANCD59glycoproteinOS=HomosapiensGN=CD59PE=1SV=1;tr|H0YET2|H0YET2_HUMANCD59glycoprotein(Fragment)OS=HomosapiensGN=CD59PE=1SV=1	11071000	274480000	77524000	1	81177000	36865000	310850000	370660000	1009500000	770080000	8.01862e+07	615272500	7.67305	0.00531258
tr|C9JIS1|C9JIS1_HUMANGuaninenucleotide-bindingproteinG(I)/G(S)/G(T)subunitbeta-2(Fragment)OS=HomosapiensGN=GNB2PE=1SV=1	48163000	64004000	26155000	1	82226000	9094800	53906000	200820000	207510000	190720000	3.82738e+07	163239000	4.26503	0.00556387
sp|P01876|IGHA1_HUMANImmunoglobulinheavyconstantalpha1OS=HomosapiensGN=IGHA1PE=1SV=2	3805800000	9395900000	5930500000	1	2619100000	795430000	8760900000	15207000000	31664000000	29047000000	3757788334	21169725000	5.63356	0.00593793
sp|Q5TD94|RSH4A_HUMANRadialspokeheadprotein4homologAOS=HomosapiensGN=RSPH4APE=1SV=1	1	15323000	12152000	1	16439000	1	76424000	12531000	54344000	51177000	7.319e+06	48619000	6.64285	0.00641024
tr|E7EQR4|E7EQR4_HUMANEzrinOS=HomosapiensGN=EZRPE=1SV=3;sp|P15311|EZRI_HUMANEzrinOS=HomosapiensGN=EZRPE=1SV=4;sp|P35241|RADI_HUMANRadixinOS=HomosapiensGN=RDXPE=1SV=1	60044000	632720000	507260000	1	662730000	70351000	912720000	660620000	1397100000	1479600000	3.22184e+08	1112510000	3.45303	0.00732375
sp|P06702|S10A9_HUMANProteinS100-A9OS=HomosapiensGN=S100A9PE=1SV=1	216420000	92580000	16278000	1	120960000	1	200900000	274750000	615590000	659740000	7.4373e+07	437745000	5.88581	0.00746385
sp|P30044|PRDX5_HUMANPeroxiredoxin-5,mitochondrialOS=HomosapiensGN=PRDX5PE=1SV=4	1	78537000	79716000	1	158710000	38318000	130400000	186290000	184450000	257560000	5.92135e+07	189675000	3.20324	0.00779144
sp|P98088|MUC5A_HUMANMucin-5ACOS=HomosapiensGN=MUC5ACPE=1SV=4	7442400000	1871500000	366960000	1	3273400000	669810000	3651300000	12505000000	11709000000	11891000000	2270678334	9939075000	4.37714	0.00811293
sp|Q96CX2|KCD12_HUMANBTB/POZdomain-containingproteinKCTD12OS=HomosapiensGN=KCTD12PE=1SV=1	1	24603000	1	1	1	1	47936000	15118000	34132000	24321000	4.1005e+06	30376750	7.40806	0.00835303
sp|Q08380|LG3BP_HUMANGalectin-3-bindingproteinOS=HomosapiensGN=LGALS3BPPE=1SV=1;tr|K7EP36|K7EP36_HUMANGalectin-3-bindingprotein(Fragment)OS=HomosapiensGN=LGALS3BPPE=1SV=1;tr|K7ESM3|K7ESM3_HUMANGalectin-3-bindingprotein(Fragment)OS=HomosapiensGN=LGALS3BPPE=1SV=1;tr|K7EKQ5|K7EKQ5_HUMANGalectin-3-bindingproteinOS=HomosapiensGN=LGALS3BPPE=1SV=1;tr|K7ERZ6|K7ERZ6_HUMANGalectin-3-bindingproteinOS=Homosa…	20080000	41339000	183220000	1	137340000	48143000	177110000	236720000	559620000	368520000	7.1687e+07	335492500	4.67996	0.00868124
sp|P07225|PROS_HUMANVitaminK-dependentproteinSOS=HomosapiensGN=PROS1PE=1SV=1;tr|G5E9F8|G5E9F8_HUMANProteinS(Alpha),isoformCRA_bOS=HomosapiensGN=PROS1PE=1SV=1;tr|H7BXT0|H7BXT0_HUMANVitaminK-dependentproteinS(Fragment)OS=HomosapiensGN=PROS1PE=1SV=1;tr|C9K0R0|C9K0R0_HUMANVitaminK-dependentproteinS(Fragment)OS=HomosapiensGN=PROS1PE=1SV=1;CON__P07224	5090600	2694700	1	1	3405000	1	20404000	13193000	7122300	5739300	1.86505e+06	11614650	6.22753	0.00943029
sp|P01615|KVD28_HUMANImmunoglobulinkappavariable2D-28OS=HomosapiensGN=IGKV2D-28PE=1SV=2;sp|A0A075B6P5|KV228_HUMANImmunoglobulinkappavariable2-28OS=HomosapiensGN=IGKV2-28PE=3SV=1;tr|A0A087X0Q4|A0A087X0Q4_HUMANImmunoglobulinkappavariable2-40OS=HomosapiensGN=IGKV2-40PE=1SV=1;sp|P01614|KVD40_HUMANImmunoglobulinkappavariable2D-40OS=HomosapiensGN=IGKV2D-40PE=1SV=2;sp|A0A087WW87|KV240_HUMANImmunoglobuli…	1	116290000	1	1	41383000	1	72643000	108310000	190160000	204160000	26278834	143818250	5.47278	0.00963059
sp|B9A064|IGLL5_HUMANImmunoglobulinlambda-likepolypeptide5OS=HomosapiensGN=IGLL5PE=2SV=2;tr|A0A0B4J231|A0A0B4J231_HUMANImmunoglobulinlambda-likepolypeptide5OS=HomosapiensGN=IGLL5PE=1SV=1;sp|P0CG04|IGLC1_HUMANImmunoglobulinlambdaconstant1OS=HomosapiensGN=IGLC1PE=1SV=1	29937000	7354600	1	1	18881000	1	116580000	45763000	256290000	348940000	9.3621e+06	191893250	20.4968	0.00991216
sp|P04264|K2C1_HUMANKeratin,typeIIcytoskeletal1OS=HomosapiensGN=KRT1PE=1SV=6;CON__P04264	802950000	331560000	60386000	64364000	1625000000	609660000	1470900000	1439800000	3774000000	3591400000	582320000	2569025000	4.41171	0.00995335
sp|Q12805|FBLN3_HUMANEGF-containingfibulin-likeextracellularmatrixprotein1OS=HomosapiensGN=EFEMP1PE=1SV=2;tr|A0A0U1RQV3|A0A0U1RQV3_HUMANEGF-containingfibulin-likeextracellularmatrixprotein1(Fragment)OS=HomosapiensGN=EFEMP1PE=1SV=1;tr|C9JQX7|C9JQX7_HUMANEGF-containingfibulin-likeextracellularmatrixprotein1(Fragment)OS=HomosapiensGN=EFEMP1PE=1SV=1;tr|C9J4J8|C9J4J8_HUMANEGF-containingfibulin-likeext…	1	3820100	6795900	1	1	1	256870000	69528000	71184000	85669000	1769334	120812750	68.2815	0.0107485
sp|P06727|APOA4_HUMANApolipoproteinA-IVOS=HomosapiensGN=APOA4PE=1SV=3;CON__Q32PJ2	40466000	92965000	9060900	1	56135000	24096000	874080000	236310000	220470000	417170000	3.71205e+07	437007500	11.7727	0.0110955
tr|C9JS50|C9JS50_HUMANMetalloreductaseSTEAP4OS=HomosapiensGN=STEAP4PE=1SV=1;sp|Q687X5|STEA4_HUMANMetalloreductaseSTEAP4OS=HomosapiensGN=STEAP4PE=1SV=1	1	12550000	18801000	1	1	1	17419000	55315000	122410000	155570000	5.22517e+06	87678500	16.78	0.0112182
sp|P63104|1433Z_HUMAN14-3-3proteinzeta/deltaOS=HomosapiensGN=YWHAZPE=1SV=1;tr|E7EX29|E7EX29_HUMAN14-3-3proteinzeta/delta(Fragment)OS=HomosapiensGN=YWHAZPE=1SV=1;tr|B0AZS6|B0AZS6_HUMAN14-3-3proteinzeta/deltaOS=HomosapiensGN=YWHAZPE=1SV=1;tr|B7Z2E6|B7Z2E6_HUMAN14-3-3proteinzeta/deltaOS=HomosapiensGN=YWHAZPE=1SV=1;tr|H0YB80|H0YB80_HUMAN14-3-3proteinzeta/delta(Fragment)OS=HomosapiensGN=YWHAZPE=1SV=1;…	83771000	83154000	210760000	1	221070000	46017000	237750000	647870000	383320000	281950000	1.07462e+08	387722500	3.608	0.0114336
sp|Q16348|S15A2_HUMANSolutecarrierfamily15member2OS=HomosapiensGN=SLC15A2PE=1SV=2	1	1	15620000	1	24454000	1	21584000	30094000	24554000	24066000	6.679e+06	25074500	3.75423	0.0116031
sp|P35908|K22E_HUMANKeratin,typeIIcytoskeletal2epidermalOS=HomosapiensGN=KRT2PE=1SV=2;CON__P35908;sp|Q01546|K22O_HUMANKeratin,typeIIcytoskeletal2oralOS=HomosapiensGN=KRT76PE=1SV=2;CON__Q01546;CON__Q6NXH9;sp|Q7Z794|K2C1B_HUMANKeratin,typeIIcytoskeletal1bOS=HomosapiensGN=KRT77PE=1SV=3;CON__Q7Z794;CON__Q9R0H5	63566000	28656000	36309000	1	265470000	70580000	402310000	202450000	262090000	218080000	7.74302e+07	271232500	3.50293	0.0126385
sp|P80511|S10AC_HUMANProteinS100-A12OS=HomosapiensGN=S100A12PE=1SV=2	1	143610000	33952000	1	343630000	1	262940000	269040000	664340000	468510000	8.68653e+07	416207500	4.79141	0.0127117
sp|P62879|GBB2_HUMANGuaninenucleotide-bindingproteinG(I)/G(S)/G(T)subunitbeta-2OS=HomosapiensGN=GNB2PE=1SV=3;tr|C9JXA5|C9JXA5_HUMANGuaninenucleotide-bindingproteinG(I)/G(S)/G(T)subunitbeta-2(Fragment)OS=HomosapiensGN=GNB2PE=1SV=1;tr|C9JZN1|C9JZN1_HUMANGuaninenucleotide-bindingproteinG(I)/G(S)/G(T)subunitbeta-2(Fragment)OS=HomosapiensGN=GNB2PE=1SV=1;tr|E7EP32|E7EP32_HUMANGuaninenucleotide-bindingp…	80582000	175800000	102340000	1	117840000	22883000	183250000	146930000	372770000	307910000	8.32408e+07	252715000	3.03595	0.0127993
sp|P01023|A2MG_HUMANAlpha-2-macroglobulinOS=HomosapiensGN=A2MPE=1SV=3;tr|F8W7L3|F8W7L3_HUMANAlpha-2-macroglobulin(Fragment)OS=HomosapiensGN=A2MPE=1SV=1;tr|F5H1E8|F5H1E8_HUMANAlpha-2-macroglobulinOS=HomosapiensGN=A2MPE=1SV=1	77491000	4322500000	207600000	48476000	4702700000	55368000	11029000000	7879700000	4538600000	4390200000	1569022500	6959375000	4.43548	0.0134434
sp|P31949|S10AB_HUMANProteinS100-A11OS=HomosapiensGN=S100A11PE=1SV=2	144970000	104510000	40736000	215680000	97402000	97490000	147910000	294920000	247140000	272290000	116798000	240565000	2.05967	0.0138227
sp|Q8WXI7|MUC16_HUMANMucin-16OS=HomosapiensGN=MUC16PE=1SV=3;tr|M0QZZ9|M0QZZ9_HUMANMucin-16(Fragment)OS=HomosapiensGN=MUC16PE=1SV=1;tr|M0R2S7|M0R2S7_HUMANMucin-16(Fragment)OS=HomosapiensGN=MUC16PE=1SV=1;tr|M0R2Y5|M0R2Y5_HUMANMucin-16(Fragment)OS=HomosapiensGN=MUC16PE=1SV=1	1	104580000	4501400	1	67380000	41979000	45272000	188590000	381950000	342680000	3.64067e+07	239623000	6.58183	0.0138631
sp|O00560|SDCB1_HUMANSyntenin-1OS=HomosapiensGN=SDCBPPE=1SV=1;tr|B4DHN5|B4DHN5_HUMANSyntenin-1OS=HomosapiensGN=SDCBPPE=1SV=1;tr|E9PBU7|E9PBU7_HUMANSyntenin-1OS=HomosapiensGN=SDCBPPE=1SV=1;tr|G5EA09|G5EA09_HUMANSyndecanbindingprotein(Syntenin),isoformCRA_aOS=HomosapiensGN=SDCBPPE=1SV=1	127300000	104370000	124180000	1	146520000	35073000	134550000	188500000	328450000	359770000	8.95738e+07	252817500	2.82245	0.0141002
sp|Q9UGT4|SUSD2_HUMANSushidomain-containingprotein2OS=HomosapiensGN=SUSD2PE=1SV=1	31887000	40420000	19611000	1	22171000	29735000	60915000	30376000	110520000	118450000	2.39707e+07	80065250	3.34013	0.0141943
sp|O43866|CD5L_HUMANCD5antigen-likeOS=HomosapiensGN=CD5LPE=1SV=1	1	1	2589900	1	4944900	1	31141000	33623000	7370800	6424800	1.2558e+06	19639900	15.6393	0.0146364
sp|P25815|S100P_HUMANProteinS100-POS=HomosapiensGN=S100PPE=1SV=2	120380000	1	1	1	54201000	1	281410000	1146800000	327760000	360840000	29096834	529202500	18.1876	0.0163854
tr|F8W0G4|F8W0G4_HUMANPoly(rC)-bindingprotein2(Fragment)OS=HomosapiensGN=PCBP2PE=1SV=1;tr|F8VZX2|F8VZX2_HUMANPoly(rC)-bindingprotein2OS=HomosapiensGN=PCBP2PE=1SV=1;sp|Q15366|PCBP2_HUMANPoly(rC)-bindingprotein2OS=HomosapiensGN=PCBP2PE=1SV=1;tr|F8VXH9|F8VXH9_HUMANPoly(rC)-bindingprotein2(Fragment)OS=HomosapiensGN=PCBP2PE=1SV=1;tr|F8W1G6|F8W1G6_HUMANPoly(rC)-bindingprotein2(Fragment)OS=HomosapiensGN…	53327000	54642000	21543000	54703000	90186000	52373000	25990000	12845000	22750000	20346000	5.44623e+07	20482750	0.37609	0.0170124
sp|Q9UHG3|PCYOX_HUMANPrenylcysteineoxidase1OS=HomosapiensGN=PCYOX1PE=1SV=3;tr|C9JGT6|C9JGT6_HUMANPrenylcysteineoxidase1(Fragment)OS=HomosapiensGN=PCYOX1PE=1SV=8;tr|C9JM55|C9JM55_HUMANPrenylcysteineoxidase1(Fragment)OS=HomosapiensGN=PCYOX1PE=1SV=1;tr|C9K055|C9K055_HUMANPrenylcysteineoxidase1(Fragment)OS=HomosapiensGN=PCYOX1PE=1SV=1;tr|F8W8W4|F8W8W4_HUMANPrenylcysteineoxidase1OS=HomosapiensGN=PCYOX…	1	1	8186000	1	4739000	1	11119000	7398800	7033600	6684400	2.15417e+06	8058950	3.7411	0.0170637
tr|A0A075B6R9|A0A075B6R9_HUMANImmunoglobulinkappavariable2D-24(non-functional)(Fragment)OS=HomosapiensGN=IGKV2D-24PE=4SV=1;sp|A0A0C4DH68|KV224_HUMANImmunoglobulinkappavariable2-24OS=HomosapiensGN=IGKV2-24PE=3SV=1	1	20013000	1	1	20312000	1	20355000	19220000	75279000	77377000	6720834	48057750	7.15056	0.0181161
sp|P04040|CATA_HUMANCatalaseOS=HomosapiensGN=CATPE=1SV=3	1	50678000	27620000	1	26627000	36887000	27696000	92194000	185980000	118120000	2.36353e+07	105997500	4.48471	0.0182831
sp|P06331|HV434_HUMANImmunoglobulinheavyvariable4-34OS=HomosapiensGN=IGHV4-34PE=1SV=2;sp|P01825|HV459_HUMANImmunoglobulinheavyvariable4-59OS=HomosapiensGN=IGHV4-59PE=1SV=2;sp|P0DP08|HVD82_HUMANImmunoglobulinheavyvariable4-38-2OS=HomosapiensGN=IGHV4-38-2PE=3SV=1;sp|P0DP06|HVD34_HUMANImmunoglobulinheavyvariable4-30-4OS=HomosapiensGN=IGHV4-30-4PE=3SV=1;sp|A0A0C4DH41|HV461_HUMANImmunoglobulinheavyvar…	1	34309000	27311000	1	31723000	1	29098000	43322000	123060000	103580000	1.55572e+07	74765000	4.80582	0.0183175
sp|Q15582|BGH3_HUMANTransforminggrowthfactor-beta-inducedproteinig-h3OS=HomosapiensGN=TGFBIPE=1SV=1;tr|H0Y8L3|H0Y8L3_HUMANTransforminggrowthfactor-beta-inducedproteinig-h3(Fragment)OS=HomosapiensGN=TGFBIPE=1SV=1;tr|S4R3C6|S4R3C6_HUMANTransforminggrowthfactor-beta-inducedproteinig-h3(Fragment)OS=HomosapiensGN=TGFBIPE=1SV=1;tr|H0Y9D7|H0Y9D7_HUMANTransforminggrowthfactor-beta-inducedproteinig-h3(Fra…	1	10645000	6221900	1	22983000	1	82416000	26544000	53362000	14723000	6.64165e+06	44261250	6.66419	0.0186687
sp|P63261|ACTG_HUMANActin,cytoplasmic2OS=HomosapiensGN=ACTG1PE=1SV=1;tr|I3L3I0|I3L3I0_HUMANActin,cytoplasmic2(Fragment)OS=HomosapiensGN=ACTG1PE=1SV=1;tr|I3L1U9|I3L1U9_HUMANActin,cytoplasmic2(Fragment)OS=HomosapiensGN=ACTG1PE=1SV=1;tr|I3L4N8|I3L4N8_HUMANActin,cytoplasmic2(Fragment)OS=HomosapiensGN=ACTG1PE=1SV=8;tr|I3L3R2|I3L3R2_HUMANActin,cytoplasmic2(Fragment)OS=HomosapiensGN=ACTG1PE=1SV=1;tr|J3K…	49144000	271100000	392660000	96396000	247840000	191840000	28772000	1	23885000	30992000	2.08163e+08	2.09123e+07	0.100461	0.0188959
sp|P84077|ARF1_HUMANADP-ribosylationfactor1OS=HomosapiensGN=ARF1PE=1SV=2;sp|P61204|ARF3_HUMANADP-ribosylationfactor3OS=HomosapiensGN=ARF3PE=1SV=2;tr|F5H423|F5H423_HUMANUncharacterizedproteinOS=HomosapiensPE=3SV=1;tr|F5H0C7|F5H0C7_HUMANADP-ribosylationfactor3(Fragment)OS=HomosapiensGN=ARF3PE=3SV=1;tr|H0YGG7|H0YGG7_HUMANUncharacterizedprotein(Fragment)OS=HomosapiensPE=4SV=1	1	1	1	1	11058000	69153000	315690000	48294000	76740000	197600000	1.33685e+07	159581000	11.9371	0.0199723
sp|Q93077|H2A1C_HUMANHistoneH2Atype1-COS=HomosapiensGN=HIST1H2ACPE=1SV=3;sp|Q7L7L0|H2A3_HUMANHistoneH2Atype3OS=HomosapiensGN=HIST3H2APE=1SV=3;sp|P04908|H2A1B_HUMANHistoneH2Atype1-B/EOS=HomosapiensGN=HIST1H2ABPE=1SV=2	1474500000	1710900000	603840000	922250000	1952300000	867300000	1739200000	9842300000	5056100000	4213700000	1255181667	5212825000	4.15304	0.0201269
sp|P08603|CFAH_HUMANComplementfactorHOS=HomosapiensGN=CFHPE=1SV=4;tr|A0A087WYK9|A0A087WYK9_HUMANComplementfactorH-relatedprotein3OS=HomosapiensGN=CFHR3PE=1SV=1;tr|Q6NSD3|Q6NSD3_HUMANCFHR3proteinOS=HomosapiensGN=CFHR3PE=1SV=1;sp|Q02985|FHR3_HUMANComplementfactorH-relatedprotein3OS=HomosapiensGN=CFHR3PE=1SV=2	29861000	63122000	1	1	13464000	14896000	90373000	23992000	83025000	137040000	2.02238e+07	83607500	4.13411	0.0204171
sp|P15144|AMPN_HUMANAminopeptidaseNOS=HomosapiensGN=ANPEPPE=1SV=4;tr|H0YLZ8|H0YLZ8_HUMANAminopeptidaseN(Fragment)OS=HomosapiensGN=ANPEPPE=1SV=1	1	13648000	1	1	9127100	1	20221000	101810000	211800000	380030000	3.79585e+06	178465250	47.0159	0.0219518
sp|P04196|HRG_HUMANHistidine-richglycoproteinOS=HomosapiensGN=HRGPE=1SV=1	3429700	1	4780000	1	977630	8317600	65092000	5791800	19002000	38425000	2.91749e+06	32077700	10.995	0.0223241
sp|Q99878|H2A1J_HUMANHistoneH2Atype1-JOS=HomosapiensGN=HIST1H2AJPE=1SV=3;sp|Q96KK5|H2A1H_HUMANHistoneH2Atype1-HOS=HomosapiensGN=HIST1H2AHPE=1SV=3;sp|Q9BTM1|H2AJ_HUMANHistoneH2A.JOS=HomosapiensGN=H2AFJPE=1SV=1;sp|Q16777|H2A2C_HUMANHistoneH2Atype2-COS=HomosapiensGN=HIST2H2ACPE=1SV=4;sp|Q6FI13|H2A2A_HUMANHistoneH2Atype2-AOS=HomosapiensGN=HIST2H2AA3PE=1SV=3;sp|P0C0S8|H2A1_HUMANHistoneH2Atype1OS=Homos…	887510000	544710000	49016000	144280000	772250000	195180000	1096100000	4368200000	1592800000	1600800000	4.32158e+08	2164475000	5.00853	0.0226191
tr|E9PJK1|E9PJK1_HUMANTetraspaninOS=HomosapiensGN=CD81PE=1SV=1;tr|E9PRJ8|E9PRJ8_HUMANTetraspanin(Fragment)OS=HomosapiensGN=CD81PE=1SV=1;tr|H0YDL9|H0YDL9_HUMANTetraspanin(Fragment)OS=HomosapiensGN=CD81PE=1SV=1;tr|H0YDJ9|H0YDJ9_HUMANTetraspanin(Fragment)OS=HomosapiensGN=CD81PE=1SV=1;sp|P60033|CD81_HUMANCD81antigenOS=HomosapiensGN=CD81PE=1SV=1;tr|E9PIF1|E9PIF1_HUMANTetraspaninOS=HomosapiensGN=CD81PE…	22245000	16755000	17146000	1	14978000	38283000	32930000	29623000	46855000	66506000	1.82345e+07	43978500	2.41183	0.0227473
sp|P62805|H4_HUMANHistoneH4OS=HomosapiensGN=HIST1H4APE=1SV=2	546020000	2357300000	915360000	988790000	614750000	865880000	1621900000	5138800000	2403500000	2743600000	1048016667	2976950000	2.84056	0.0231383
sp|P07357|CO8A_HUMANComplementcomponentC8alphachainOS=HomosapiensGN=C8APE=1SV=2	5687500	1	6116800	1	1	8035900	10954000	11233000	9803200	5402100	3.3067e+06	9348075	2.82701	0.0239068
tr|E9PLT1|E9PLT1_HUMANPlateletglycoprotein4OS=HomosapiensGN=CD36PE=1SV=1;tr|E7EU05|E7EU05_HUMANPlateletglycoprotein4(Fragment)OS=HomosapiensGN=CD36PE=1SV=2;sp|P16671|CD36_HUMANPlateletglycoprotein4OS=HomosapiensGN=CD36PE=1SV=2	1	1956200	1	1	6317600	1	4966800	7752200	22971000	8207300	1.37897e+06	10974325	7.95836	0.0242941
tr|Q5T985|Q5T985_HUMANInter-alpha-trypsininhibitorheavychainH2OS=HomosapiensGN=ITIH2PE=1SV=1;sp|P19823|ITIH2_HUMANInter-alpha-trypsininhibitorheavychainH2OS=HomosapiensGN=ITIH2PE=1SV=2;tr|Q5T987|Q5T987_HUMANInter-alpha-trypsininhibitorheavychainH2(Fragment)OS=HomosapiensGN=ITIH2PE=1SV=1;CON__Q9TRI1	1	29765000	27498000	1	74090000	24092000	91131000	29348000	87947000	107250000	2.59075e+07	78919000	3.04618	0.0253619
tr|Q5TEC6|Q5TEC6_HUMANHistoneH3OS=HomosapiensGN=HIST2H3PS2PE=1SV=1	696030000	86940000	41721000	1	171890000	58336000	307430000	1275300000	661750000	716660000	1.7582e+08	740285000	4.21048	0.0258948
sp|P01602|KV105_HUMANImmunoglobulinkappavariable1-5OS=HomosapiensGN=IGKV1-5PE=1SV=2	1	3863300	1620000	1	5774100	1	12340000	14211000	82276000	109990000	1.87623e+06	54704250	29.1564	0.0265418
sp|P02790|HEMO_HUMANHemopexinOS=HomosapiensGN=HPXPE=1SV=2;tr|Q9BS19|Q9BS19_HUMANHPXproteinOS=HomosapiensGN=HPXPE=1SV=1	1	5710900	19023000	1	2532200	1	79499000	1	39564000	44309000	4.54435e+06	4.0843e+07	8.98764	0.0267952
sp|P06576|ATPB_HUMANATPsynthasesubunitbeta,mitochondrialOS=HomosapiensGN=ATP5BPE=1SV=3;tr|H0YH81|H0YH81_HUMANATPsynthasesubunitbeta(Fragment)OS=HomosapiensGN=ATP5BPE=1SV=1;tr|F8W079|F8W079_HUMANATPsynthasesubunitbeta,mitochondrial(Fragment)OS=HomosapiensGN=ATP5BPE=1SV=1	67048000	17621000	68831000	70761000	37468000	67928000	38741000	1	17712000	23629000	5.49428e+07	2.00205e+07	0.364388	0.0273233
sp|P17213|BPI_HUMANBactericidalpermeability-increasingproteinOS=HomosapiensGN=BPIPE=1SV=4;tr|H0Y738|H0Y738_HUMANBactericidalpermeability-increasingproteinOS=HomosapiensGN=BPIPE=1SV=2;tr|A0A0D9SFX6|A0A0D9SFX6_HUMANBactericidalpermeability-increasingproteinOS=HomosapiensGN=BPIPE=1SV=1	18764000	142420000	7856200	1	81562000	1	153860000	115160000	93569000	142140000	4.1767e+07	126182250	3.0211	0.0280463
sp|P21589|5NTD_HUMAN5'-nucleotidaseOS=HomosapiensGN=NT5EPE=1SV=1;tr|Q96B60|Q96B60_HUMAN5'-nucleotidaseOS=HomosapiensGN=NT5EPE=1SV=1;tr|H0Y3X5|H0Y3X5_HUMAN5'-nucleotidase(Fragment)OS=HomosapiensGN=NT5EPE=1SV=1;tr|H0Y7R7|H0Y7R7_HUMAN5'-nucleotidase(Fragment)OS=HomosapiensGN=NT5EPE=1SV=1	1	1061100	1	20609000	930260	1	19888000	11457000	113990000	114010000	3.76673e+06	64836250	17.2129	0.0283678
sp|Q06830|PRDX1_HUMANPeroxiredoxin-1OS=HomosapiensGN=PRDX1PE=1SV=1;tr|A0A0A0MSI0|A0A0A0MSI0_HUMANPeroxiredoxin-1(Fragment)OS=HomosapiensGN=PRDX1PE=1SV=1;tr|A0A0A0MRQ5|A0A0A0MRQ5_HUMANPeroxiredoxin-1OS=HomosapiensGN=PRDX1PE=1SV=1	46576000	442110000	373180000	159480000	523900000	357960000	1025200000	227380000	1398800000	842940000	317201000	873580000	2.75403	0.0315725
sp|P16050|LOX15_HUMANArachidonate15-lipoxygenaseOS=HomosapiensGN=ALOX15PE=1SV=3;tr|I3L175|I3L175_HUMANArachidonate15-lipoxygenase(Fragment)OS=HomosapiensGN=ALOX15PE=1SV=1	46463000	506940000	74519000	1	328970000	114660000	752480000	564620000	331970000	365650000	1.78592e+08	503680000	2.82028	0.0334812
sp|P13798|ACPH_HUMANAcylamino-acid-releasingenzymeOS=HomosapiensGN=APEHPE=1SV=4;tr|C9JIF9|C9JIF9_HUMANAcylamino-acid-releasingenzymeOS=HomosapiensGN=APEHPE=1SV=1;tr|C9JLK2|C9JLK2_HUMANAcylamino-acid-releasingenzyme(Fragment)OS=HomosapiensGN=APEHPE=1SV=1;tr|H7C393|H7C393_HUMANAcylamino-acid-releasingenzyme(Fragment)OS=HomosapiensGN=APEHPE=1SV=1;tr|H7C1U0|H7C1U0_HUMANAcylamino-acid-releasingenzyme(…	1	1	34542000	1	20597000	1	22187000	38100000	23390000	39351000	9189834	30757000	3.34685	0.0338162
sp|Q07954|LRP1_HUMANProlow-densitylipoproteinreceptor-relatedprotein1OS=HomosapiensGN=LRP1PE=1SV=2;tr|Q6PJ72|Q6PJ72_HUMANLRP1proteinOS=HomosapiensGN=LRP1PE=1SV=1	1	1	48722000	1	69179000	88153000	227420000	706270000	153490000	148510000	3.43423e+07	308922500	8.99538	0.0340699
tr|A0A140T975|A0A140T975_HUMANHLAclassIhistocompatibilityantigen,A-3alphachainOS=HomosapiensGN=HLA-APE=1SV=1;tr|Q9GJ45|Q9GJ45_HUMANHLAclassIhistocompatibilityantigen,A-3alphachainOS=HomosapiensGN=HLA-APE=1SV=1;tr|A0A1W2PS39|A0A1W2PS39_HUMANHLAclassIhistocompatibilityantigen,A-3alphachainOS=HomosapiensGN=HLA-APE=1SV=1;sp|P30459|1A74_HUMANHLAclassIhistocompatibilityantigen,A-74alphachainOS=Homosapi…	1	26500000	1	1	36710000	1	52723000	36466000	24374000	28611000	1.0535e+07	35543500	3.37385	0.0343974
sp|P06396|GELS_HUMANGelsolinOS=HomosapiensGN=GSNPE=1SV=1;tr|A0A0A0MS51|A0A0A0MS51_HUMANGelsolinOS=HomosapiensGN=GSNPE=1SV=1;tr|A0A0A0MT01|A0A0A0MT01_HUMANGelsolinOS=HomosapiensGN=GSNPE=1SV=1;CON__Q3SX14;tr|A0A0U1RQL8|A0A0U1RQL8_HUMANGelsolin(Fragment)OS=HomosapiensGN=GSNPE=1SV=1;tr|Q5T0H8|Q5T0H8_HUMANGelsolin(Fragment)OS=HomosapiensGN=GSNPE=1SV=2	48171000	425300000	91756000	1	667430000	127010000	1262800000	427140000	662130000	564710000	2.26611e+08	729195000	3.21782	0.0347941
sp|P11279|LAMP1_HUMANLysosome-associatedmembraneglycoprotein1OS=HomosapiensGN=LAMP1PE=1SV=3	1	7482100	1	1	54033000	1	58382000	1	98388000	97174000	1.02525e+07	6.3486e+07	6.19224	0.0373473
sp|Q15599|NHRF2_HUMANNa(+)/H(+)exchangeregulatorycofactorNHE-RF2OS=HomosapiensGN=SLC9A3R2PE=1SV=2;tr|H3BUQ9|H3BUQ9_HUMANNa(+)/H(+)exchangeregulatorycofactorNHE-RF2(Fragment)OS=HomosapiensGN=SLC9A3R2PE=1SV=1;tr|H3BN50|H3BN50_HUMANNa(+)/H(+)exchangeregulatorycofactorNHE-RF2(Fragment)OS=HomosapiensGN=SLC9A3R2PE=1SV=1;tr|H3BQS0|H3BQS0_HUMANNa(+)/H(+)exchangeregulatorycofactorNHE-RF2OS=HomosapiensGN=S…	1	18454000	1	1	10998000	1	1	24743000	29164000	37544000	4.90867e+06	2.28628e+07	4.65763	0.0449845
sp|P61626|LYSC_HUMANLysozymeCOS=HomosapiensGN=LYZPE=1SV=1;tr|F8VV32|F8VV32_HUMANLysozymeCOS=HomosapiensGN=LYZPE=1SV=1;tr|A0A0B4J259|A0A0B4J259_HUMANLysozymeCOS=HomosapiensGN=LYZPE=1SV=1	17581000	42207000	1	1	23023000	28135000	250500000	26045000	71094000	99564000	1.8491e+07	111800750	6.04623	0.0452386
sp|P62258|1433E_HUMAN14-3-3proteinepsilonOS=HomosapiensGN=YWHAEPE=1SV=1;tr|B4DJF2|B4DJF2_HUMAN14-3-3proteinepsilonOS=HomosapiensGN=YWHAEPE=1SV=1;tr|I3L3T1|I3L3T1_HUMAN14-3-3proteinepsilonOS=HomosapiensGN=YWHAEPE=1SV=1;tr|K7EM20|K7EM20_HUMAN14-3-3proteinepsilon(Fragment)OS=HomosapiensGN=YWHAEPE=1SV=1;tr|I3L0W5|I3L0W5_HUMAN14-3-3proteinepsilonOS=HomosapiensGN=YWHAEPE=1SV=1	43031000	88545000	87420000	1	46770000	29363000	131690000	1361500000	396650000	341400000	4.91882e+07	557810000	11.3403	0.0473259
sp|P07988|PSPB_HUMANPulmonarysurfactant-associatedproteinBOS=HomosapiensGN=SFTPBPE=1SV=3;tr|D6W5L6|D6W5L6_HUMANPulmonarysurfactant-associatedproteinBOS=HomosapiensGN=SFTPBPE=1SV=1;tr|H0Y7V6|H0Y7V6_HUMANPulmonarysurfactant-associatedproteinB(Fragment)OS=HomosapiensGN=SFTPBPE=1SV=1;tr|U3KQT2|U3KQT2_HUMANPulmonarysurfactant-associatedproteinB(Fragment)OS=HomosapiensGN=SFTPBPE=1SV=1	883960000	1008600000	566280000	1	483840000	302790000	1326300000	657460000	1238800000	1012900000	5.40912e+08	1058865000	1.95756	0.0488964
sp|P61224|RAP1B_HUMANRas-relatedproteinRap-1bOS=HomosapiensGN=RAP1BPE=1SV=1;tr|E7ESV4|E7ESV4_HUMANRas-relatedproteinRap-1b(Fragment)OS=HomosapiensGN=RAP1BPE=1SV=1;tr|F5H7Y6|F5H7Y6_HUMANRas-relatedproteinRap-1bOS=HomosapiensGN=RAP1BPE=1SV=1;tr|F5H6R7|F5H6R7_HUMANRas-relatedproteinRap-1b(Fragment)OS=HomosapiensGN=RAP1BPE=1SV=1;tr|F5H004|F5H004_HUMANRas-relatedproteinRap-1b(Fragment)OS=HomosapiensGN…	244270000	314680000	363470000	1	262050000	146820000	55285000	29619000	112840000	77806000	2.21882e+08	68887500	0.31047	0.0552192

## Sheet: Grp1vs4
Significant Changes Group 1( 1-2yrs) vs Group 4 (18+yrs)
Protein IDs	LFQ intensity 1Y1	LFQ intensity 1Y2	LFQ intensity 1Y3	LFQ intensity 1Y4	LFQ intensity 1Y5	LFQ intensity 1Y6	LFQ intensity ADULT1	LFQ intensity ADULT3	LFQ intensity ADULT4	LFQ intensity ADULT5	LFQ intensity ADULT7	Mean 1yr	Mean Adult	Ratio	Ttest
sp|P06702|S10A9_HUMANProteinS100-A9OS=HomosapiensGN=S100A9PE=1SV=1	216420000	92580000	16278000	1	120960000	1	480920000	1346900000	1732500000	1057300000	2142800000	7.4373e+07	1352084000	18.1798	0.000820404
tr|F8W0G4|F8W0G4_HUMANPoly(rC)-bindingprotein2(Fragment)OS=HomosapiensGN=PCBP2PE=1SV=1;tr|F8VZX2|F8VZX2_HUMANPoly(rC)-bindingprotein2OS=HomosapiensGN=PCBP2PE=1SV=1;sp|Q15366|PCBP2_HUMANPoly(rC)-bindingprotein2OS=HomosapiensGN=PCBP2PE=1SV=1;tr|F8VXH9|F8VXH9_HUMANPoly(rC)-bindingprotein2(Fragment)OS=HomosapiensGN=PCBP2PE=1SV=1;tr|F8W1G6|F8W1G6_HUMANPoly(rC)-bindingprotein2(Fragment)OS=HomosapiensGN…	53327000	54642000	21543000	54703000	90186000	52373000	5166700	19293000	1	1	1	5.44623e+07	4.89194e+06	0.0898225	0.00100779
sp|P49913|CAMP_HUMANCathelicidinantimicrobialpeptideOS=HomosapiensGN=CAMPPE=1SV=1;tr|J3KNB4|J3KNB4_HUMANCathelicidinantimicrobialpeptideOS=HomosapiensGN=CAMPPE=1SV=1	46011000	1	1	1	5687300	24048000	29377000	540390000	286420000	525200000	632020000	1.26244e+07	402681400	31.8971	0.00343347
sp|Q5VTE0|EF1A3_HUMANPutativeelongationfactor1-alpha-like3OS=HomosapiensGN=EEF1A1P5PE=5SV=1;sp|P68104|EF1A1_HUMANElongationfactor1-alpha1OS=HomosapiensGN=EEF1A1PE=1SV=1;tr|A0A087WVQ9|A0A087WVQ9_HUMANElongationfactor1-alpha1OS=HomosapiensGN=EEF1A1PE=1SV=1;tr|A0A087WV01|A0A087WV01_HUMANElongationfactor1-alphaOS=HomosapiensGN=EEF1A1PE=1SV=1;sp|Q05639|EF1A2_HUMANElongationfactor1-alpha2OS=Homosapiens…	1466600000	4032800000	2545600000	1239300000	4512900000	3098100000	1387300000	56980000	1	1	1	2.81588e+09	2.88856e+08	0.102581	0.00364549
sp|P08758|ANXA5_HUMANAnnexinA5OS=HomosapiensGN=ANXA5PE=1SV=2;tr|E9PHT9|E9PHT9_HUMANAnnexinOS=HomosapiensGN=ANXA5PE=1SV=1;tr|D6RBL5|D6RBL5_HUMANAnnexinOS=HomosapiensGN=ANXA5PE=1SV=1;tr|D6RBE9|D6RBE9_HUMANAnnexinOS=HomosapiensGN=ANXA5PE=1SV=1;tr|D6RCN3|D6RCN3_HUMANAnnexinA5OS=HomosapiensGN=ANXA5PE=1SV=1	4527800000	5594900000	5739400000	187420000	3087700000	3971300000	43470000	633440000	483900000	67529000	124070000	3851420000	270481800	0.0702291	0.00398312
sp|P02788|TRFL_HUMANLactotransferrinOS=HomosapiensGN=LTFPE=1SV=6;tr|E7EQB2|E7EQB2_HUMANLactotransferrin(Fragment)OS=HomosapiensGN=LTFPE=1SV=1;tr|E7ER44|E7ER44_HUMANLactotransferrinOS=HomosapiensGN=LTFPE=1SV=1;tr|C9JCF5|C9JCF5_HUMANLactotransferrin(Fragment)OS=HomosapiensGN=LTFPE=1SV=1	24120000	1068100000	84977000	1	382230000	1	33196000000	18838000000	37451000000	47098000000	123710000	2.59905e+08	27341342000	105.198	0.00520178
sp|P12429|ANXA3_HUMANAnnexinA3OS=HomosapiensGN=ANXA3PE=1SV=3;tr|D6RFG5|D6RFG5_HUMANAnnexin(Fragment)OS=HomosapiensGN=ANXA3PE=1SV=1;tr|D6RCA8|D6RCA8_HUMANAnnexin(Fragment)OS=HomosapiensGN=ANXA3PE=1SV=1;tr|D6RAZ8|D6RAZ8_HUMANAnnexin(Fragment)OS=HomosapiensGN=ANXA3PE=1SV=1;tr|D6RFJ9|D6RFJ9_HUMANAnnexinA3(Fragment)OS=HomosapiensGN=ANXA3PE=1SV=1	6523500000	5615000000	2221600000	92101000	5114900000	3442600000	64726000	44879000	132930000	203470000	69931000	3.83495e+09	103187200	0.0269071	0.00734343
sp|P80511|S10AC_HUMANProteinS100-A12OS=HomosapiensGN=S100A12PE=1SV=2	1	143610000	33952000	1	343630000	1	36358000	2942800000	3524100000	4691300000	7183300000	8.68653e+07	3675571600	42.3134	0.00778711
tr|Q5JP53|Q5JP53_HUMANTubulinbetachainOS=HomosapiensGN=TUBBPE=1SV=1;sp|P07437|TBB5_HUMANTubulinbetachainOS=HomosapiensGN=TUBBPE=1SV=2;tr|Q5ST81|Q5ST81_HUMANTubulinbetachainOS=HomosapiensGN=TUBBPE=1SV=1;tr|G3V5W4|G3V5W4_HUMANTubulinbeta-3chainOS=HomosapiensGN=TUBB3PE=1SV=1;tr|G3V2R8|G3V2R8_HUMANHCG1983504,isoformCRA_eOS=HomosapiensGN=TUBB3PE=1SV=1;tr|G3V3R4|G3V3R4_HUMANHCG1983504,isoformCRA_cOS=Ho…	147310000	551490000	263400000	173340000	246580000	171100000	102390000	46185000	1	1	1	258870000	2.9715e+07	0.114787	0.00987746
sp|P80723|BASP1_HUMANBrainacidsolubleprotein1OS=HomosapiensGN=BASP1PE=1SV=2;tr|U3KQP0|U3KQP0_HUMANBrainacidsolubleprotein1(Fragment)OS=HomosapiensGN=BASP1PE=1SV=8	1	5427700	1	1	8129600	1	80558000	9453500	19987000	108610000	66974000	2.25955e+06	57116500	25.2778	0.0100736
sp|P60709|ACTB_HUMANActin,cytoplasmic1OS=HomosapiensGN=ACTBPE=1SV=1;tr|G5E9R0|G5E9R0_HUMANActin,cytoplasmic1OS=HomosapiensGN=ACTBPE=1SV=1;tr|E7EVS6|E7EVS6_HUMANActin,cytoplasmic1(Fragment)OS=HomosapiensGN=ACTBPE=1SV=8;tr|C9JZR7|C9JZR7_HUMANActin,cytoplasmic1(Fragment)OS=HomosapiensGN=ACTBPE=1SV=8;tr|C9JTX5|C9JTX5_HUMANActin,cytoplasmic1(Fragment)OS=HomosapiensGN=ACTBPE=1SV=1;tr|C9JUM1|C9JUM1_HUMA…	13276000000	33492000000	43909000000	8203400000	30142000000	17106000000	11974000000	2651800000	2390700000	3415100000	181180000	2.43547e+10	4122556000	0.169271	0.011907
sp|O60635|TSN1_HUMANTetraspanin-1OS=HomosapiensGN=TSPAN1PE=1SV=2	28252000	97801000	18484000	1	59528000	1	203830000	189950000	204930000	168270000	1	3.40108e+07	1.53396e+08	4.51021	0.0137819
tr|Q5HY54|Q5HY54_HUMANFilamin-AOS=HomosapiensGN=FLNAPE=1SV=1;sp|P21333|FLNA_HUMANFilamin-AOS=HomosapiensGN=FLNAPE=1SV=4;tr|Q60FE5|Q60FE5_HUMANFilamin-AOS=HomosapiensGN=FLNAPE=1SV=1;tr|A0A087WWY3|A0A087WWY3_HUMANFilamin-AOS=HomosapiensGN=FLNAPE=1SV=1;tr|F8WE98|F8WE98_HUMANFilamin-A(Fragment)OS=HomosapiensGN=FLNAPE=1SV=2;sp|Q14315|FLNC_HUMANFilamin-COS=HomosapiensGN=FLNCPE=1SV=3;tr|H0Y5C6|H0Y5C6_HU…	1713900000	3651600000	2988900000	1	2629500000	1058800000	639670000	27646000	11766000	26190000	56150000	2.00712e+09	152284400	0.0758722	0.0148961
sp|P14618|KPYM_HUMANPyruvatekinasePKMOS=HomosapiensGN=PKMPE=1SV=4;tr|B4DNK4|B4DNK4_HUMANPyruvatekinaseOS=HomosapiensGN=PKMPE=1SV=1;tr|H3BTN5|H3BTN5_HUMANPyruvatekinase(Fragment)OS=HomosapiensGN=PKMPE=1SV=1;tr|H3BQ34|H3BQ34_HUMANPyruvatekinaseOS=HomosapiensGN=PKMPE=1SV=1;tr|H3BR70|H3BR70_HUMANPyruvatekinaseOS=HomosapiensGN=PKMPE=1SV=1;tr|H3BUW1|H3BUW1_HUMANPyruvatekinasePKM(Fragment)OS=Homosapiens…	752300000	1286800000	1985700000	434780000	2753100000	781450000	318030000	13095000	282530000	23051000	34649000	1332355000	134271000	0.100777	0.0156224
sp|Q71U36|TBA1A_HUMANTubulinalpha-1AchainOS=HomosapiensGN=TUBA1APE=1SV=1;sp|Q9BQE3|TBA1C_HUMANTubulinalpha-1CchainOS=HomosapiensGN=TUBA1CPE=1SV=1;tr|F5H5D3|F5H5D3_HUMANTubulinalphachainOS=HomosapiensGN=TUBA1CPE=1SV=1;sp|Q13748|TBA3C_HUMANTubulinalpha-3C/DchainOS=HomosapiensGN=TUBA3CPE=1SV=3;sp|Q6PEY2|TBA3E_HUMANTubulinalpha-3EchainOS=HomosapiensGN=TUBA3EPE=1SV=2;tr|F8VQQ4|F8VQQ4_HUMANTubulinalpha…	1405400000	7098800000	2337000000	722860000	5241900000	3551500000	673750000	35794000	12244000	1	1	3392910000	1.44358e+08	0.0425468	0.016166
sp|P15153|RAC2_HUMANRas-relatedC3botulinumtoxinsubstrate2OS=HomosapiensGN=RAC2PE=1SV=1;tr|B1AH77|B1AH77_HUMANRas-relatedC3botulinumtoxinsubstrate2OS=HomosapiensGN=RAC2PE=1SV=1;tr|B1AH80|B1AH80_HUMANRas-relatedC3botulinumtoxinsubstrate2OS=HomosapiensGN=RAC2PE=1SV=1;tr|B1AH78|B1AH78_HUMANRas-relatedC3botulinumtoxinsubstrate2(Fragment)OS=HomosapiensGN=RAC2PE=1SV=1	133750000	269300000	190140000	1	224320000	89537000	67076000	1	1	23117000	1	1.51175e+08	1.80386e+07	0.119323	0.017158
sp|P03973|SLPI_HUMANAntileukoproteinaseOS=HomosapiensGN=SLPIPE=1SV=2	33837000	9823900	1	1	1	1	409560000	248940000	64623000	353310000	1	7.27682e+06	2.15287e+08	29.5853	0.0181295
sp|P08246|ELNE_HUMANNeutrophilelastaseOS=HomosapiensGN=ELANEPE=1SV=1	522690000	10139000	4122400	1	319050000	23108000	524920000	4402100000	4298800000	2681800000	319450000	1.46518e+08	2445414000	16.6902	0.0185472
sp|P08238|HS90B_HUMANHeatshockproteinHSP90-betaOS=HomosapiensGN=HSP90AB1PE=1SV=4;sp|Q58FF7|H90B3_HUMANPutativeheatshockproteinHSP90-beta-3OS=HomosapiensGN=HSP90AB3PPE=5SV=1;sp|Q58FF8|H90B2_HUMANPutativeheatshockproteinHSP90-beta2OS=HomosapiensGN=HSP90AB2PPE=1SV=2	337090000	718780000	765510000	274520000	1350700000	407360000	298700000	70015000	82366000	9289400	74032000	6.42327e+08	106880480	0.166396	0.0185513
sp|P07737|PROF1_HUMANProfilin-1OS=HomosapiensGN=PFN1PE=1SV=2;tr|K7EJ44|K7EJ44_HUMANProfilinOS=HomosapiensGN=PFN1PE=1SV=1;CON__P02584;tr|I3L3D5|I3L3D5_HUMANProfilin(Fragment)OS=HomosapiensGN=PFN1PE=1SV=1	561060000	1047700000	742630000	1	864670000	324620000	288580000	63924000	18228000	33354000	1	5.90113e+08	8.08172e+07	0.136952	0.0190844
sp|Q15907|RB11B_HUMANRas-relatedproteinRab-11BOS=HomosapiensGN=RAB11BPE=1SV=4;tr|H3BMH2|H3BMH2_HUMANRas-relatedproteinRab-11A(Fragment)OS=HomosapiensGN=RAB11APE=4SV=1;tr|H3BSC1|H3BSC1_HUMANRas-relatedproteinRab-11AOS=HomosapiensGN=RAB11APE=1SV=1;sp|P62491|RB11A_HUMANRas-relatedproteinRab-11AOS=HomosapiensGN=RAB11APE=1SV=3;tr|B4DQU5|B4DQU5_HUMANRas-relatedproteinRab-11AOS=HomosapiensGN=RAB11APE=1S…	45690000	127150000	188180000	1	201390000	113790000	15692000	1	1	35632000	1	1.127e+08	1.02648e+07	0.0910808	0.0194332
sp|P04083|ANXA1_HUMANAnnexinA1OS=HomosapiensGN=ANXA1PE=1SV=2;tr|Q5T3N1|Q5T3N1_HUMANAnnexin(Fragment)OS=HomosapiensGN=ANXA1PE=1SV=1;tr|Q5T3N0|Q5T3N0_HUMANAnnexin(Fragment)OS=HomosapiensGN=ANXA1PE=1SV=1	7918800000	10366000000	2867200000	12798000	6348300000	3004900000	570310000	46487000	17883000	383950000	26515000	5086333000	209029000	0.0410962	0.0196227
sp|P04040|CATA_HUMANCatalaseOS=HomosapiensGN=CATPE=1SV=3	1	50678000	27620000	1	26627000	36887000	185420000	100320000	65070000	433900000	164880000	2.36353e+07	189918000	8.03534	0.0203156
sp|P61224|RAP1B_HUMANRas-relatedproteinRap-1bOS=HomosapiensGN=RAP1BPE=1SV=1;tr|E7ESV4|E7ESV4_HUMANRas-relatedproteinRap-1b(Fragment)OS=HomosapiensGN=RAP1BPE=1SV=1;tr|F5H7Y6|F5H7Y6_HUMANRas-relatedproteinRap-1bOS=HomosapiensGN=RAP1BPE=1SV=1;tr|F5H6R7|F5H6R7_HUMANRas-relatedproteinRap-1b(Fragment)OS=HomosapiensGN=RAP1BPE=1SV=1;tr|F5H004|F5H004_HUMANRas-relatedproteinRap-1b(Fragment)OS=HomosapiensGN…	244270000	314680000	363470000	1	262050000	146820000	61267000	1	27358000	115890000	55049000	2.21882e+08	5.19128e+07	0.233966	0.0221336
sp|P11142|HSP7C_HUMANHeatshockcognate71kDaproteinOS=HomosapiensGN=HSPA8PE=1SV=1;tr|E9PKE3|E9PKE3_HUMANHeatshockcognate71kDaproteinOS=HomosapiensGN=HSPA8PE=1SV=1;tr|E9PNE6|E9PNE6_HUMANHeatshockcognate71kDaproteinOS=HomosapiensGN=HSPA8PE=1SV=1;tr|E9PN89|E9PN89_HUMANHeatshockcognate71kDaprotein(Fragment)OS=HomosapiensGN=HSPA8PE=1SV=1;tr|E9PQQ4|E9PQQ4_HUMANHeatshockcognate71kDaprotein(Fragment)OS=Hom…	224020000	863270000	374280000	138800000	573180000	190390000	161460000	1	1	35746000	13019000	393990000	4.2045e+07	0.106716	0.0230879
sp|P05164|PERM_HUMANMyeloperoxidaseOS=HomosapiensGN=MPOPE=1SV=1;tr|J3QSF7|J3QSF7_HUMANMyeloperoxidase(Fragment)OS=HomosapiensGN=MPOPE=1SV=8	249460000	1122600000	99700000	1	1108800000	50689000	13012000000	33906000000	77732000000	40798000000	459130000	4.38542e+08	33181426000	75.6631	0.0230983
sp|P13489|RINI_HUMANRibonucleaseinhibitorOS=HomosapiensGN=RNH1PE=1SV=2;tr|E9PMJ3|E9PMJ3_HUMANRibonucleaseinhibitor(Fragment)OS=HomosapiensGN=RNH1PE=1SV=1;tr|E9PLZ3|E9PLZ3_HUMANRibonucleaseinhibitor(Fragment)OS=HomosapiensGN=RNH1PE=1SV=1;tr|E9PIM9|E9PIM9_HUMANRibonucleaseinhibitor(Fragment)OS=HomosapiensGN=RNH1PE=1SV=1;tr|E9PIK5|E9PIK5_HUMANRibonucleaseinhibitor(Fragment)OS=HomosapiensGN=RNH1PE=1S…	129170000	354560000	523180000	1	582690000	142460000	24597000	1	1	1	31884000	2.88677e+08	1.12962e+07	0.039131	0.028202
sp|P35579|MYH9_HUMANMyosin-9OS=HomosapiensGN=MYH9PE=1SV=4;sp|P35580|MYH10_HUMANMyosin-10OS=HomosapiensGN=MYH10PE=1SV=3;sp|P35749|MYH11_HUMANMyosin-11OS=HomosapiensGN=MYH11PE=1SV=3;tr|Q5BKV1|Q5BKV1_HUMANMYH9proteinOS=HomosapiensGN=MYH9PE=1SV=1;tr|B1AH99|B1AH99_HUMANMyosin-9(Fragment)OS=HomosapiensGN=MYH9PE=1SV=1;tr|E7ERA5|E7ERA5_HUMANMyosin-10(Fragment)OS=HomosapiensGN=MYH10PE=1SV=8;sp|P12883|MYH7…	2109700000	3628200000	3298400000	40517000	3875600000	1136200000	1708100000	26859000	13580000	161300000	17752000	2.3481e+09	385518200	0.164183	0.0284826
sp|Q99879|H2B1M_HUMANHistoneH2Btype1-MOS=HomosapiensGN=HIST1H2BMPE=1SV=3;sp|Q99877|H2B1N_HUMANHistoneH2Btype1-NOS=HomosapiensGN=HIST1H2BNPE=1SV=3;sp|Q93079|H2B1H_HUMANHistoneH2Btype1-HOS=HomosapiensGN=HIST1H2BHPE=1SV=3;sp|Q5QNW6|H2B2F_HUMANHistoneH2Btype2-FOS=HomosapiensGN=HIST2H2BFPE=1SV=3;sp|P62807|H2B1C_HUMANHistoneH2Btype1-C/E/F/G/IOS=HomosapiensGN=HIST1H2BCPE=1SV=4;sp|P58876|H2B1D_HUMANHisto…	1728500000	1366600000	743850000	1030100000	739710000	1068500000	1866300000	12688000000	6072300000	15599000000	2132300000	1.11288e+09	7671580000	6.89347	0.0285368
sp|P02747|C1QC_HUMANComplementC1qsubcomponentsubunitCOS=HomosapiensGN=C1QCPE=1SV=3	123750000	37204000	72010000	1	56383000	86015000	166650000	1390700000	753250000	1172100000	1	6.25603e+07	6.9654e+08	11.1339	0.0298683
sp|Q99832|TCPH_HUMANT-complexprotein1subunitetaOS=HomosapiensGN=CCT7PE=1SV=2;tr|F8WAM2|F8WAM2_HUMANT-complexprotein1subuniteta(Fragment)OS=HomosapiensGN=CCT7PE=1SV=1	21329000	57231000	59419000	1	179790000	38781000	53793000	511790000	351880000	283710000	110880000	5.9425e+07	262410600	4.41583	0.031826
sp|Q15365|PCBP1_HUMANPoly(rC)-bindingprotein1OS=HomosapiensGN=PCBP1PE=1SV=2	46414000	262280000	125000000	68483000	357010000	81751000	23862000	1	1	1	43350000	156823000	1.34424e+07	0.085717	0.0327033
sp|P07355|ANXA2_HUMANAnnexinA2OS=HomosapiensGN=ANXA2PE=1SV=2;tr|H0YN42|H0YN42_HUMANAnnexin(Fragment)OS=HomosapiensGN=ANXA2PE=1SV=1;tr|H0YMD0|H0YMD0_HUMANAnnexin(Fragment)OS=HomosapiensGN=ANXA2PE=1SV=1;tr|H0YMU9|H0YMU9_HUMANAnnexinOS=HomosapiensGN=ANXA2PE=1SV=1;sp|A6NMY6|AXA2L_HUMANPutativeannexinA2-likeproteinOS=HomosapiensGN=ANXA2P2PE=5SV=2;tr|H0YM50|H0YM50_HUMANAnnexin(Fragment)OS=HomosapiensGN…	1656800000	1875000000	3596800000	431440000	1135200000	4816000000	1217800000	305650000	149070000	136090000	1	2.25187e+09	3.61722e+08	0.160632	0.0357202
sp|Q8WUM4|PDC6I_HUMANProgrammedcelldeath6-interactingproteinOS=HomosapiensGN=PDCD6IPPE=1SV=1;tr|F8WEQ7|F8WEQ7_HUMANProgrammedcelldeath6-interactingproteinOS=HomosapiensGN=PDCD6IPPE=1SV=1;tr|F8WBR8|F8WBR8_HUMANProgrammedcelldeath6-interactingproteinOS=HomosapiensGN=PDCD6IPPE=1SV=1;tr|C9IZF9|C9IZF9_HUMANProgrammedcelldeath6-interactingprotein(Fragment)OS=HomosapiensGN=PDCD6IPPE=1SV=1;tr|F8WDK9|F8WD…	114680000	439260000	346690000	1	337320000	79793000	73033000	1	35883000	14868000	1	2.19624e+08	2.47568e+07	0.112724	0.0394131
sp|P62258|1433E_HUMAN14-3-3proteinepsilonOS=HomosapiensGN=YWHAEPE=1SV=1;tr|B4DJF2|B4DJF2_HUMAN14-3-3proteinepsilonOS=HomosapiensGN=YWHAEPE=1SV=1;tr|I3L3T1|I3L3T1_HUMAN14-3-3proteinepsilonOS=HomosapiensGN=YWHAEPE=1SV=1;tr|K7EM20|K7EM20_HUMAN14-3-3proteinepsilon(Fragment)OS=HomosapiensGN=YWHAEPE=1SV=1;tr|I3L0W5|I3L0W5_HUMAN14-3-3proteinepsilonOS=HomosapiensGN=YWHAEPE=1SV=1	43031000	88545000	87420000	1	46770000	29363000	35523000	1591100000	1781400000	2989800000	1	4.91882e+07	1.27956e+09	26.0137	0.0400638
sp|Q8IWL2|SFTA1_HUMANPulmonarysurfactant-associatedproteinA1OS=HomosapiensGN=SFTPA1PE=1SV=2;sp|Q8IWL1|SFPA2_HUMANPulmonarysurfactant-associatedproteinA2OS=HomosapiensGN=SFTPA2PE=1SV=1;tr|X6REF7|X6REF7_HUMANPulmonarysurfactant-associatedproteinA2(Fragment)OS=HomosapiensGN=SFTPA2PE=4SV=1;tr|A0A0C4DG36|A0A0C4DG36_HUMANPulmonarysurfactant-associatedproteinA1(Fragment)OS=HomosapiensGN=SFTPA1PE=4SV=1	27944000000	26481000000	50882000000	2170000000	19284000000	85499000000	16415000000	29437000	64589000	44356000	1	3.53767e+10	3.31068e+09	0.0935836	0.0413676
tr|H3BM89|H3BM89_HUMAN60SribosomalproteinL4OS=HomosapiensGN=RPL4PE=1SV=1;sp|P36578|RL4_HUMAN60SribosomalproteinL4OS=HomosapiensGN=RPL4PE=1SV=5;tr|H3BU31|H3BU31_HUMAN60SribosomalproteinL4(Fragment)OS=HomosapiensGN=RPL4PE=1SV=1	1	72866000	211610000	275350000	59884000	95267000	49040000	1760700000	2087700000	1349900000	1	1.19163e+08	1.04947e+09	8.80701	0.0429362
sp|P14550|AK1A1_HUMANAlcoholdehydrogenase[NADP(+)]OS=HomosapiensGN=AKR1A1PE=1SV=3;tr|Q5T621|Q5T621_HUMANAlcoholdehydrogenase[NADP(+)](Fragment)OS=HomosapiensGN=AKR1A1PE=1SV=1;tr|V9GYG2|V9GYG2_HUMANAlcoholdehydrogenase[NADP(+)]OS=HomosapiensGN=AKR1A1PE=1SV=1;tr|V9GYP9|V9GYP9_HUMANAlcoholdehydrogenase[NADP(+)](Fragment)OS=HomosapiensGN=AKR1A1PE=1SV=1	1	50021000	61908000	1	72215000	37375000	1	1	1	17120000	1	3.69198e+07	3.424e+06	0.0927415	0.0435708
tr|A6NKB8|A6NKB8_HUMANAminopeptidaseBOS=HomosapiensGN=RNPEPPE=1SV=1;sp|Q9H4A4|AMPB_HUMANAminopeptidaseBOS=HomosapiensGN=RNPEPPE=1SV=2;tr|A0A087WUS4|A0A087WUS4_HUMANAminopeptidaseB(Fragment)OS=HomosapiensGN=RNPEPPE=1SV=1;tr|A0A087WU27|A0A087WU27_HUMANAminopeptidaseB(Fragment)OS=HomosapiensGN=RNPEPPE=1SV=1;tr|C9JMZ3|C9JMZ3_HUMANAminopeptidaseB(Fragment)OS=HomosapiensGN=RNPEPPE=1SV=1	1	113290000	72958000	112270000	64284000	30308000	15086000	30824000	1	16539000	24040000	6.55183e+07	1.72978e+07	0.264015	0.0453758
sp|P09960|LKHA4_HUMANLeukotrieneA-4hydrolaseOS=HomosapiensGN=LTA4HPE=1SV=2;tr|B4DEH5|B4DEH5_HUMANLeukotrieneA-4hydrolaseOS=HomosapiensGN=LTA4HPE=1SV=1	174830000	1695700000	1952300000	1	1646300000	340160000	112550000	12821000	1	26206000	63559000	9.68215e+08	4.30272e+07	0.0444397	0.0460087
sp|P16152|CBR1_HUMANCarbonylreductase[NADPH]1OS=HomosapiensGN=CBR1PE=1SV=3;tr|E9PQ63|E9PQ63_HUMANCarbonylreductase[NADPH]1OS=HomosapiensGN=CBR1PE=1SV=1;tr|A8MTM1|A8MTM1_HUMANCarbonylreductase[NADPH]1OS=HomosapiensGN=CBR1PE=1SV=1	12804000	471800000	677560000	1	605120000	144450000	6406200	1	6111200	1	1	3.18622e+08	2.50348e+06	0.0078572	0.0462625
sp|Q9H0U4|RAB1B_HUMANRas-relatedproteinRab-1BOS=HomosapiensGN=RAB1BPE=1SV=1;tr|E9PLD0|E9PLD0_HUMANRas-relatedproteinRab-1BOS=HomosapiensGN=RAB1BPE=1SV=1;sp|P62820|RAB1A_HUMANRas-relatedproteinRab-1AOS=HomosapiensGN=RAB1APE=1SV=3;tr|E7END7|E7END7_HUMANRas-relatedproteinRab-1AOS=HomosapiensGN=RAB1APE=1SV=1;sp|Q92928|RAB1C_HUMANPutativeRas-relatedproteinRab-1COS=HomosapiensGN=RAB1CPE=5SV=2	91517000	115800000	85227000	1	78761000	67216000	3904200	67324000	1	45331000	1	7.30868e+07	2.33118e+07	0.318961	0.0478433
sp|P08311|CATG_HUMANCathepsinGOS=HomosapiensGN=CTSGPE=1SV=2	85904000	85787000	50574000	1	371710000	1	1356300000	13789000000	5848700000	4025500000	204950000	9.89958e+07	5044890000	50.9606	0.048382
