# Supplementary material
Source: HighWire-hosted journal article supplement (https://thorax.bmj.com/content/75/6/449)
Supplement: inline-supplementary-material-7 [file inline-supplementary-material-7.xlsx]

## Sheet: AdultvCon
Protein IDs	LFQ intensity Adult1	LFQ intensity ADULT2	LFQ intensity ADULT3	LFQ intensity ADULT4	LFQ intensity ADULT5	LFQ intensity CTL1	LFQ intensity CTL2	LFQ intensity CTL3	LFQ intensity CTL4	LFQ intensity CTL5	Mean Adults	Mean CTL	Ratio	sig
sp|P35247|SFTPD_HUMANPulmonarysurfactant-associatedproteinDOS=HomosapiensGN=SFTPDPE=1SV=3;tr|Q5T0M2|Q5T0M2_HUMANPulmonarysurfactant-associatedproteinD(Fragment)OS=HomosapiensGN=SFTPDPE=4SV=1	882410000	183650000	29934000	1	259890000	32091000000	33286000000	1	20255000000	31860000000	2.71177e+08	2.34984e+10	0.0115402	0.00634379
sp|P07195|LDHB_HUMANL-lactatedehydrogenaseBchainOS=HomosapiensGN=LDHBPE=1SV=2;tr|A8MW50|A8MW50_HUMANL-lactatedehydrogenase(Fragment)OS=HomosapiensGN=LDHBPE=1SV=1;tr|F5H793|F5H793_HUMANL-lactatedehydrogenaseBchain(Fragment)OS=HomosapiensGN=LDHBPE=1SV=1;tr|C9J7H8|C9J7H8_HUMANL-lactatedehydrogenaseBchain(Fragment)OS=HomosapiensGN=LDHBPE=1SV=8;tr|F5H5G7|F5H5G7_HUMANL-lactatedehydrogenaseOS=Homosapien…	20763000	1	1	1	1	87776000	64250000	1	107520000	120710000	4.1526e+06	7.60512e+07	0.0546027	0.0105686
sp|P05155|IC1_HUMANPlasmaproteaseC1inhibitorOS=HomosapiensGN=SERPING1PE=1SV=2;tr|E9PGN7|E9PGN7_HUMANPlasmaproteaseC1inhibitorOS=HomosapiensGN=SERPING1PE=1SV=1;tr|H9KV48|H9KV48_HUMANPlasmaproteaseC1inhibitorOS=HomosapiensGN=SERPING1PE=1SV=1;tr|H0YCA1|H0YCA1_HUMANPlasmaproteaseC1inhibitor(Fragment)OS=HomosapiensGN=SERPING1PE=1SV=1	51098000	1	33909000	14865000	1	417370000	256430000	1	450150000	568380000	1.99744e+07	3.38466e+08	0.0590145	0.0121141
sp|P35527|K1C9_HUMANKeratin,typeIcytoskeletal9OS=HomosapiensGN=KRT9PE=1SV=3;CON__P35527;tr|K7EQQ3|K7EQQ3_HUMANKeratin,typeIcytoskeletal9OS=HomosapiensGN=KRT9PE=1SV=1	5549000	483840000	331440000	200790000	1	2138100000	2439600000	1	1495400000	2022000000	2.04324e+08	1.61902e+09	0.126202	0.0126771
sp|P01594|KV133_HUMANImmunoglobulinkappavariable1-33OS=HomosapiensGN=IGKV1-33PE=1SV=2;sp|P01593|KVD33_HUMANImmunoglobulinkappavariable1D-33OS=HomosapiensGN=IGKV1D-33PE=1SV=2	4739100	1	1	1	1	23871000	31384000	1	25285000	11556000	947821	1.84192e+07	0.0514583	0.0154327
sp|Q9UGT4|SUSD2_HUMANSushidomain-containingprotein2OS=HomosapiensGN=SUSD2PE=1SV=1	366570000	70225000	82996000	36952000	1	4969800000	5731100000	1	2666500000	2516900000	1.11349e+08	3.17686e+09	0.0350499	0.0165696
sp|Q16348|S15A2_HUMANSolutecarrierfamily15member2OS=HomosapiensGN=SLC15A2PE=1SV=2	28244000	1	1	1	1	102150000	60763000	1	139630000	83859000	5.6488e+06	7.72804e+07	0.0730949	0.0171748
sp|P35908|K22E_HUMANKeratin,typeIIcytoskeletal2epidermalOS=HomosapiensGN=KRT2PE=1SV=2	78252000	64676000	83082000	84597000	138680000	809720000	613080000	1	543270000	993440000	89857400	5.91902e+08	0.151811	0.0174184
sp|O95436|NPT2B_HUMANSodium-dependentphosphatetransportprotein2BOS=HomosapiensGN=SLC34A2PE=1SV=3	48275000	1	1	64694000	1	168530000	199840000	1	267310000	325910000	2.25938e+07	1.92318e+08	0.117481	0.0177033
sp|P01743|HV146_HUMANImmunoglobulinheavyvariable1-46OS=HomosapiensGN=IGHV1-46PE=1SV=2;sp|P0DP01|HV108_HUMANImmunoglobulinheavyvariable1-8OS=HomosapiensGN=IGHV1-8PE=3SV=1;sp|P01742|HV169_HUMANImmunoglobulinheavyvariable1-69OS=HomosapiensGN=IGHV1-69PE=1SV=2;sp|A0A0B4J2H0|HV69D_HUMANImmunoglobulinheavyvariable1-69DOS=HomosapiensGN=IGHV1-69DPE=3SV=1	17411000	1	1	1	1	38544000	74555000	1	34462000	63729000	3.4822e+06	4.2258e+07	0.0824034	0.0202798
tr|H3BLV0|H3BLV0_HUMANComplementdecay-acceleratingfactor(Fragment)OS=HomosapiensGN=CD55PE=1SV=1;sp|P08174|DAF_HUMANComplementdecay-acceleratingfactorOS=HomosapiensGN=CD55PE=1SV=4;tr|B1AP13|B1AP13_HUMANComplementdecay-acceleratingfactorOS=HomosapiensGN=CD55PE=1SV=1;tr|H7BY55|H7BY55_HUMANComplementdecay-acceleratingfactorOS=HomosapiensGN=CD55PE=1SV=2;tr|B1AP15|B1AP15_HUMANCD55antigen,decayaccelerat…	45337000	1	1	1	1	1559800000	2245100000	1	595150000	1236400000	9.0674e+06	1.12729e+09	0.00804354	0.0203459
sp|P08246|ELNE_HUMANNeutrophilelastaseOS=HomosapiensGN=ELANEPE=1SV=1	17827000	5083800000	5292200000	2781100000	1664600000	2741000	2243300	1	427740000	38248000	2967905400	9.41945e+07	31.5083	0.0217614
sp|B9A064|IGLL5_HUMANImmunoglobulinlambda-likepolypeptide5OS=HomosapiensGN=IGLL5PE=2SV=2;tr|A0A0B4J231|A0A0B4J231_HUMANImmunoglobulinlambda-likepolypeptide5OS=HomosapiensGN=IGLL5PE=1SV=1;sp|P0CG04|IGLC1_HUMANImmunoglobulinlambdaconstant1OS=HomosapiensGN=IGLC1PE=1SV=1	376190000	1	1	1	1	1301300000	1041700000	1	805990000	555010000	7.5238e+07	7.408e+08	0.101563	0.0221183
sp|P05107|ITB2_HUMANIntegrinbeta-2OS=HomosapiensGN=ITGB2PE=1SV=2;tr|J3KNI6|J3KNI6_HUMANIntegrinbeta(Fragment)OS=HomosapiensGN=ITGB2PE=1SV=1;tr|E5RK25|E5RK25_HUMANIntegrinbeta(Fragment)OS=HomosapiensGN=ITGB2PE=1SV=1;tr|E5RIG7|E5RIG7_HUMANIntegrinbeta-2(Fragment)OS=HomosapiensGN=ITGB2PE=1SV=1;tr|E5RHE6|E5RHE6_HUMANIntegrinbeta-2(Fragment)OS=HomosapiensGN=ITGB2PE=1SV=1;tr|E5RHT0|E5RHT0_HUMANIntegrin…	101300000	597880000	344400000	638160000	909660000	111100000	51876000	1	250510000	145660000	518280000	1.11829e+08	4.63457	0.0223755
sp|P04839|CY24B_HUMANCytochromeb-245heavychainOS=HomosapiensGN=CYBBPE=1SV=2	4533200	1	1	1	1	11034000	22522000	1	10747000	11960000	906641	1.12526e+07	0.0805717	0.0227967
sp|P01780|HV307_HUMANImmunoglobulinheavyvariable3-7OS=HomosapiensGN=IGHV3-7PE=1SV=2;sp|P01763|HV348_HUMANImmunoglobulinheavyvariable3-48OS=HomosapiensGN=IGHV3-48PE=1SV=2;sp|P01762|HV311_HUMANImmunoglobulinheavyvariable3-11OS=HomosapiensGN=IGHV3-11PE=1SV=2;sp|A0A0B4J1V1|HV321_HUMANImmunoglobulinheavyvariable3-21OS=HomosapiensGN=IGHV3-21PE=1SV=1;tr|A0A075B7F0|A0A075B7F0_HUMANImmunoglobulinheavyvari…	81907000	1	1	17782000	1	179500000	153570000	1	351230000	268980000	1.99378e+07	1.90656e+08	0.104575	0.0235062
sp|P04075|ALDOA_HUMANFructose-bisphosphatealdolaseAOS=HomosapiensGN=ALDOAPE=1SV=2;tr|J3KPS3|J3KPS3_HUMANFructose-bisphosphatealdolaseOS=HomosapiensGN=ALDOAPE=1SV=1;tr|H3BPS8|H3BPS8_HUMANFructose-bisphosphatealdolaseA(Fragment)OS=HomosapiensGN=ALDOAPE=1SV=1;tr|H3BQN4|H3BQN4_HUMANFructose-bisphosphatealdolaseOS=HomosapiensGN=ALDOAPE=1SV=1;tr|H3BUH7|H3BUH7_HUMANFructose-bisphosphatealdolaseA(Fragmen…	26116000	1	1	1	1	46110000	56313000	1	32499000	67140000	5.2232e+06	4.04124e+07	0.129247	0.0245128
sp|P05362|ICAM1_HUMANIntercellularadhesionmolecule1OS=HomosapiensGN=ICAM1PE=1SV=2;tr|K7EKL8|K7EKL8_HUMANIntercellularadhesionmolecule1(Fragment)OS=HomosapiensGN=ICAM1PE=1SV=1;tr|E7ESS4|E7ESS4_HUMANIntercellularadhesionmolecule1OS=HomosapiensGN=ICAM1PE=1SV=1	600340000	11310000	1	1	3572800	6255600000	6340000000	1	1779800000	3410800000	1.23045e+08	3.55724e+09	0.0345899	0.0249813
sp|O14745|NHRF1_HUMANNa(+)/H(+)exchangeregulatorycofactorNHE-RF1OS=HomosapiensGN=SLC9A3R1PE=1SV=4;tr|J3QRP6|J3QRP6_HUMANNa(+)/H(+)exchangeregulatorycofactorNHE-RF1(Fragment)OS=HomosapiensGN=SLC9A3R1PE=1SV=1	71583000	27028000	45044000	59749000	80202000	21788000	13670000	1	38177000	43642000	56721200	2.34554e+07	2.41826	0.0277547
sp|P04264|K2C1_HUMANKeratin,typeIIcytoskeletal1OS=HomosapiensGN=KRT1PE=1SV=6;CON__P04264;CON__H-INV:HIT000016045;tr|F8VP67|F8VP67_HUMANKeratin,typeIIcytoskeletal8(Fragment)OS=HomosapiensGN=KRT8PE=1SV=1	1	19504000	83264000	32529000	49423000	2037100000	1795600000	1	2507700000	5279600000	3.6944e+07	2.324e+09	0.0158967	0.0278093
sp|P01008|ANT3_HUMANAntithrombin-IIIOS=HomosapiensGN=SERPINC1PE=1SV=1;tr|Q8TCE1|Q8TCE1_HUMANAntithrombin-IIIOS=HomosapiensGN=SERPINC1PE=1SV=1;CON__P41361	61105000	1	1	1	1	513940000	489230000	1	117680000	302120000	1.2221e+07	2.84594e+08	0.0429419	0.0279382
sp|Q71U36|TBA1A_HUMANTubulinalpha-1AchainOS=HomosapiensGN=TUBA1APE=1SV=1;sp|P68363|TBA1B_HUMANTubulinalpha-1BchainOS=HomosapiensGN=TUBA1BPE=1SV=1;sp|Q9BQE3|TBA1C_HUMANTubulinalpha-1CchainOS=HomosapiensGN=TUBA1CPE=1SV=1;tr|F5H5D3|F5H5D3_HUMANTubulinalphachainOS=HomosapiensGN=TUBA1CPE=1SV=1;tr|A0A1W2PQM2|A0A1W2PQM2_HUMANTubulinalpha-1CchainOS=HomosapiensGN=TUBA1CPE=1SV=1;sp|P68366|TBA4A_HUMANTubuli…	71201000	17960000	13679000	1	1	187030000	344260000	1	237990000	540850000	2.0568e+07	2.62026e+08	0.078496	0.0280985
sp|P61769|B2MG_HUMANBeta-2-microglobulinOS=HomosapiensGN=B2MPE=1SV=1;tr|H0YLF3|H0YLF3_HUMANBeta-2-microglobulin(Fragment)OS=HomosapiensGN=B2MPE=1SV=1;tr|F5H6I0|F5H6I0_HUMANBeta-2-microglobulinOS=HomosapiensGN=B2MPE=1SV=2	156540000	23162000	1	1	1	836180000	956100000	1	603830000	213430000	3.59404e+07	5.21908e+08	0.0688635	0.029932
sp|Q08380|LG3BP_HUMANGalectin-3-bindingproteinOS=HomosapiensGN=LGALS3BPPE=1SV=1;tr|K7EP36|K7EP36_HUMANGalectin-3-bindingprotein(Fragment)OS=HomosapiensGN=LGALS3BPPE=1SV=1;tr|K7ESM3|K7ESM3_HUMANGalectin-3-bindingprotein(Fragment)OS=HomosapiensGN=LGALS3BPPE=1SV=1;tr|K7EKQ5|K7EKQ5_HUMANGalectin-3-bindingproteinOS=HomosapiensGN=LGALS3BPPE=1SV=1;tr|K7ERZ6|K7ERZ6_HUMANGalectin-3-bindingproteinOS=Homosa…	2361200000	1387500000	442030000	1143200000	26734000	4406300000	4515100000	1	5082100000	4598300000	1072132800	3.72036e+09	0.28818	0.0318507
sp|Q6UXB3|LYPD2_HUMANLy6/PLAURdomain-containingprotein2OS=HomosapiensGN=LYPD2PE=2SV=1	28310000	1	1	1	1	128420000	120670000	1	23835000	148870000	5.662e+06	8.4359e+07	0.0671179	0.0334418
sp|P01911|2B1F_HUMANHLAclassIIhistocompatibilityantigen,DRB1-15betachainOS=HomosapiensGN=HLA-DRB1PE=1SV=2	34995000	1	1	13138000	1	64849000	89266000	1	46868000	120580000	9.6266e+06	6.43126e+07	0.149685	0.0339178
sp|P00352|AL1A1_HUMANRetinaldehydrogenase1OS=HomosapiensGN=ALDH1A1PE=1SV=2;tr|Q5SYQ7|Q5SYQ7_HUMANRetinaldehydrogenase1(Fragment)OS=HomosapiensGN=ALDH1A1PE=1SV=1;tr|Q5SYQ9|Q5SYQ9_HUMANRetinaldehydrogenase1OS=HomosapiensGN=ALDH1A1PE=1SV=1;tr|Q5SYQ8|Q5SYQ8_HUMANRetinaldehydrogenase1(Fragment)OS=HomosapiensGN=ALDH1A1PE=1SV=1	44348000	72878000	18792000	1	39867000	152060000	252290000	1	164400000	146810000	3.5177e+07	1.43112e+08	0.2458	0.0344568
sp|P07988|PSPB_HUMANPulmonarysurfactant-associatedproteinBOS=HomosapiensGN=SFTPBPE=1SV=3;tr|D6W5L6|D6W5L6_HUMANPulmonarysurfactant-associatedproteinBOS=HomosapiensGN=SFTPBPE=1SV=1;tr|H0Y7V6|H0Y7V6_HUMANPulmonarysurfactant-associatedproteinB(Fragment)OS=HomosapiensGN=SFTPBPE=1SV=1;tr|U3KQT2|U3KQT2_HUMANPulmonarysurfactant-associatedproteinB(Fragment)OS=HomosapiensGN=SFTPBPE=1SV=1	697560000	1	1	1	36120000	1434000000	541140000	1	1810900000	1781200000	1.46736e+08	1.11345e+09	0.131785	0.0367526
sp|O96009|NAPSA_HUMANNapsin-AOS=HomosapiensGN=NAPSAPE=1SV=1;tr|M0QXC5|M0QXC5_HUMANNapsin-A(Fragment)OS=HomosapiensGN=NAPSAPE=1SV=1	54322000	39957000	1	1	1	214400000	249540000	1	713350000	393930000	1.88558e+07	3.14244e+08	0.0600037	0.0374833
sp|P01011|AACT_HUMANAlpha-1-antichymotrypsinOS=HomosapiensGN=SERPINA3PE=1SV=2;tr|G3V3A0|G3V3A0_HUMANAlpha-1-antichymotrypsinOS=HomosapiensGN=SERPINA3PE=1SV=1;tr|G3V595|G3V595_HUMANAlpha-1-antichymotrypsin(Fragment)OS=HomosapiensGN=SERPINA3PE=1SV=3;tr|A0A087WY93|A0A087WY93_HUMANAlpha-1-antichymotrypsin(Fragment)OS=HomosapiensGN=SERPINA3PE=1SV=1	14214000	1	1	1	1	181250000	178920000	1	24232000	274300000	2.8428e+06	1.3174e+08	0.0215788	0.038177
sp|P19440|GGT1_HUMANGlutathionehydrolase1proenzymeOS=HomosapiensGN=GGT1PE=1SV=2;sp|A6NGU5|GGT3_HUMANPutativeglutathionehydrolase3proenzymeOS=HomosapiensGN=GGT3PPE=5SV=2;tr|E7ET76|E7ET76_HUMANGamma-glutamyltranspeptidase1(Fragment)OS=HomosapiensGN=GGT1PE=1SV=1;tr|B5MCK8|B5MCK8_HUMANInactivegamma-glutamyltranspeptidase2OS=HomosapiensGN=GGT2PE=4SV=2;sp|P36268|GGT2_HUMANInactiveglutathionehydrolase2O…	50727000	1	1	1	1	156790000	166750000	1	117050000	37073000	1.01454e+07	9.55326e+07	0.106198	0.0386751
sp|Q9UGM3|DMBT1_HUMANDeletedinmalignantbraintumors1proteinOS=HomosapiensGN=DMBT1PE=1SV=2	4156300000	819760000	32170000	221040000	7809100	17687000000	16340000000	1	4217400000	26837000000	1047415820	1.30163e+10	0.0804697	0.040885
sp|P26038|MOES_HUMANMoesinOS=HomosapiensGN=MSNPE=1SV=3	152490000	17767000	1	103040000	1	420800000	441860000	1	147380000	420730000	5.46594e+07	2.86154e+08	0.191014	0.0409294
tr|C9JE82|C9JE82_HUMANVoltage-dependentcalciumchannelsubunitalpha-2/delta-2OS=HomosapiensGN=CACNA2D2PE=1SV=1;sp|Q9NY47|CA2D2_HUMANVoltage-dependentcalciumchannelsubunitalpha-2/delta-2OS=HomosapiensGN=CACNA2D2PE=1SV=2	29788000	70168000	1	124930000	12180000	618140000	525510000	1	390110000	1314000000	4.74132e+07	5.69552e+08	0.0832465	0.0413732
tr|E9PJK1|E9PJK1_HUMANTetraspaninOS=HomosapiensGN=CD81PE=1SV=1;tr|E9PRJ8|E9PRJ8_HUMANTetraspanin(Fragment)OS=HomosapiensGN=CD81PE=1SV=1;tr|H0YDL9|H0YDL9_HUMANTetraspanin(Fragment)OS=HomosapiensGN=CD81PE=1SV=1;tr|H0YDJ9|H0YDJ9_HUMANTetraspanin(Fragment)OS=HomosapiensGN=CD81PE=1SV=1;sp|P60033|CD81_HUMANCD81antigenOS=HomosapiensGN=CD81PE=1SV=1;tr|E9PIF1|E9PIF1_HUMANTetraspaninOS=HomosapiensGN=CD81PE…	5455700	1	1	1	1	188190000	105530000	1	98134000	382580000	1.09114e+06	1.54887e+08	0.00704476	0.0436648
sp|P08133|ANXA6_HUMANAnnexinA6OS=HomosapiensGN=ANXA6PE=1SV=3;tr|E5RK69|E5RK69_HUMANAnnexinOS=HomosapiensGN=ANXA6PE=1SV=1;tr|E5RJF5|E5RJF5_HUMANAnnexin(Fragment)OS=HomosapiensGN=ANXA6PE=1SV=8;tr|E5RK63|E5RK63_HUMANAnnexin(Fragment)OS=HomosapiensGN=ANXA6PE=1SV=1;tr|E7EMC6|E7EMC6_HUMANAnnexinOS=HomosapiensGN=ANXA6PE=1SV=1	1	86187000	65222000	53434000	97491000	1	1	1	25417000	45863000	6.04668e+07	1.4256e+07	4.2415	0.0440419
sp|P02790|HEMO_HUMANHemopexinOS=HomosapiensGN=HPXPE=1SV=2;tr|Q9BS19|Q9BS19_HUMANHPXproteinOS=HomosapiensGN=HPXPE=1SV=1	644130000	1	204620000	1	1	1439300000	1652700000	1	652760000	815290000	1.6975e+08	9.1201e+08	0.186127	0.0489391
sp|P15328|FOLR1_HUMANFolatereceptoralphaOS=HomosapiensGN=FOLR1PE=1SV=3	693490000	182450000	1	21425000	1	1815100000	1905200000	1	2567000000	420520000	1.79473e+08	1.34156e+09	0.133779	0.049402
sp|P04899|GNAI2_HUMANGuaninenucleotide-bindingproteinG(i)subunitalpha-2OS=HomosapiensGN=GNAI2PE=1SV=3;sp|P63096|GNAI1_HUMANGuaninenucleotide-bindingproteinG(i)subunitalpha-1OS=HomosapiensGN=GNAI1PE=1SV=2;sp|P08754|GNAI3_HUMANGuaninenucleotide-bindingproteinG(k)subunitalphaOS=HomosapiensGN=GNAI3PE=1SV=3;sp|P11488|GNAT1_HUMANGuaninenucleotide-bindingproteinG(t)subunitalpha-1OS=HomosapiensGN=GNAT1PE…	9108100	1	26100000	1	1	56221000	26687000	1	36545000	36054000	7.04162e+06	3.11014e+07	0.226408	0.0504555
sp|P68133|ACTS_HUMANActin,alphaskeletalmuscleOS=HomosapiensGN=ACTA1PE=1SV=1;sp|P68032|ACTC_HUMANActin,alphacardiacmuscle1OS=HomosapiensGN=ACTC1PE=1SV=1;sp|P63267|ACTH_HUMANActin,gamma-entericsmoothmuscleOS=HomosapiensGN=ACTG2PE=1SV=1;sp|P62736|ACTA_HUMANActin,aorticsmoothmuscleOS=HomosapiensGN=ACTA2PE=1SV=1;tr|A6NL76|A6NL76_HUMANActin,alphaskeletalmuscleOS=HomosapiensGN=ACTA1PE=1SV=3;tr|F8WB63|F8…	46187000	1	1	1	1	125070000	108830000	1	51431000	248220000	9.2374e+06	1.0671e+08	0.0865653	0.0519768
sp|P09211|GSTP1_HUMANGlutathioneS-transferasePOS=HomosapiensGN=GSTP1PE=1SV=2;tr|A8MX94|A8MX94_HUMANGlutathioneS-transferasePOS=HomosapiensGN=GSTP1PE=1SV=1;tr|A0A087X2E9|A0A087X2E9_HUMANGlutathioneS-transferaseP(Fragment)OS=HomosapiensGN=GSTP1PE=1SV=1;tr|A0A087X243|A0A087X243_HUMANGlutathioneS-transferaseP(Fragment)OS=HomosapiensGN=GSTP1PE=1SV=1	28697000	1	1	1	1	160200000	307050000	1	67385000	90954000	5.7394e+06	1.25118e+08	0.045872	0.0526031
sp|Q8IWL1|SFPA2_HUMANPulmonarysurfactant-associatedproteinA2OS=HomosapiensGN=SFTPA2PE=1SV=1;sp|Q8IWL2|SFTA1_HUMANPulmonarysurfactant-associatedproteinA1OS=HomosapiensGN=SFTPA1PE=1SV=2;tr|X6REF7|X6REF7_HUMANPulmonarysurfactant-associatedproteinA2(Fragment)OS=HomosapiensGN=SFTPA2PE=4SV=1;tr|A0A0C4DG36|A0A0C4DG36_HUMANPulmonarysurfactant-associatedproteinA1(Fragment)OS=HomosapiensGN=SFTPA1PE=4SV=1	8925000000	7559600	66593000	75497000	1	13322000000	7439000000	1	17055000000	9531600000	1.81493e+09	9.46952e+09	0.19166	0.0536985
tr|A0A0G2JII1|A0A0G2JII1_HUMANHLAclassIIhistocompatibilityantigen,DPbeta1chainOS=HomosapiensGN=HLA-DPB1PE=1SV=1;tr|H0Y7G7|H0Y7G7_HUMANHLAclassIIhistocompatibilityantigen,DPbeta1chain(Fragment)OS=HomosapiensGN=HLA-DPB1PE=1SV=1;tr|A0A140T9P1|A0A140T9P1_HUMANHLAclassIIhistocompatibilityantigen,DPbeta1chain(Fragment)OS=HomosapiensGN=HLA-DPB1PE=1SV=1;tr|A0A140T976|A0A140T976_HUMANHLAclassIIhistocompat…	13809000	1	1	1	1	23663000	17809000	1	71225000	37821000	2.7618e+06	3.01036e+07	0.0917432	0.0561456
sp|P02766|TTHY_HUMANTransthyretinOS=HomosapiensGN=TTRPE=1SV=1;tr|A0A087WV45|A0A087WV45_HUMANTransthyretinOS=HomosapiensGN=TTRPE=1SV=1;tr|A0A087WT59|A0A087WT59_HUMANTransthyretinOS=HomosapiensGN=TTRPE=1SV=1	184840000	1	1	1	1	841050000	924790000	1	263440000	229550000	3.6968e+07	4.51766e+08	0.08183	0.0562383
tr|Q5VY30|Q5VY30_HUMANRetinolbindingprotein4,plasma,isoformCRA_bOS=HomosapiensGN=RBP4PE=1SV=2;sp|P02753|RET4_HUMANRetinol-bindingprotein4OS=HomosapiensGN=RBP4PE=1SV=3	17827000	1	1	1	1	154540000	155040000	1	31866000	38764000	3.5654e+06	7.6042e+07	0.0468873	0.0593408
sp|O00757|F16P2_HUMANFructose-1,6-bisphosphataseisozyme2OS=HomosapiensGN=FBP2PE=1SV=2	6954700	1	1	1	1	9845900	10175000	1	3980700	10859000	1.39094e+06	6.97212e+06	0.1995	0.0599074
sp|P02749|APOH_HUMANBeta-2-glycoprotein1OS=HomosapiensGN=APOHPE=1SV=3;tr|J3QLI0|J3QLI0_HUMANBeta-2-glycoprotein1(Fragment)OS=HomosapiensGN=APOHPE=1SV=1;tr|J3KS17|J3KS17_HUMANBeta-2-glycoprotein1(Fragment)OS=HomosapiensGN=APOHPE=1SV=1;tr|J3QRN2|J3QRN2_HUMANBeta-2-glycoprotein1(Fragment)OS=HomosapiensGN=APOHPE=1SV=1;CON__P17690	279460000	1	1	1	145940000	627750000	532680000	1	249250000	369360000	8.508e+07	3.55808e+08	0.239118	0.0602352
sp|P02765|FETUA_HUMANAlpha-2-HS-glycoproteinOS=HomosapiensGN=AHSGPE=1SV=1;tr|C9JV77|C9JV77_HUMANAlpha-2-HS-glycoproteinOS=HomosapiensGN=AHSGPE=1SV=1;CON__P12763	810980000	23477000	1	25644000	1	1147100000	1234500000	1	455250000	1462100000	1.7202e+08	8.5979e+08	0.200072	0.0613238
sp|P61158|ARP3_HUMANActin-relatedprotein3OS=HomosapiensGN=ACTR3PE=1SV=3;tr|B4DXW1|B4DXW1_HUMANActin-relatedprotein3OS=HomosapiensGN=ACTR3PE=1SV=1;tr|F8WEW2|F8WEW2_HUMANActin-relatedprotein3OS=HomosapiensGN=ACTR3PE=1SV=1;tr|F8WE84|F8WE84_HUMANActin-relatedprotein3OS=HomosapiensGN=ACTR3PE=1SV=1;sp|Q9P1U1|ARP3B_HUMANActin-relatedprotein3BOS=HomosapiensGN=ACTR3BPE=2SV=1	13005000	1	1	1	1	11201000	18401000	1	13669000	30274000	2.601e+06	1.4709e+07	0.176831	0.0615299
sp|P09758|TACD2_HUMANTumor-associatedcalciumsignaltransducer2OS=HomosapiensGN=TACSTD2PE=1SV=3	13665000	44897000	1	1	1	53591000	67256000	1	56896000	39489000	1.17124e+07	4.34464e+07	0.269583	0.0616552
sp|Q9H4M9|EHD1_HUMANEHdomain-containingprotein1OS=HomosapiensGN=EHD1PE=1SV=2;tr|A0A024R571|A0A024R571_HUMANEHdomain-containingprotein1OS=HomosapiensGN=EHD1PE=1SV=1;tr|C9J2Z4|C9J2Z4_HUMANEHdomain-containingprotein1(Fragment)OS=HomosapiensGN=EHD1PE=1SV=1;tr|C9JC03|C9JC03_HUMANEHdomain-containingprotein1(Fragment)OS=HomosapiensGN=EHD1PE=1SV=1;tr|C9JIJ3|C9JIJ3_HUMANEHdomain-containingprotein1(Fragmen…	1	1	1	1	42141000	94497000	74046000	1	24694000	53347000	8.4282e+06	4.93168e+07	0.170899	0.0622194
sp|P04004|VTNC_HUMANVitronectinOS=HomosapiensGN=VTNPE=1SV=1;tr|F5GX75|F5GX75_HUMANVitronectin(Fragment)OS=HomosapiensGN=VTNPE=1SV=2;tr|H0YJW9|H0YJW9_HUMANUncharacterizedprotein(Fragment)OS=HomosapiensPE=1SV=3	128200000	1	1	1	1	270690000	317930000	1	75299000	160580000	2.564e+07	1.649e+08	0.155488	0.0626163
sp|P61626|LYSC_HUMANLysozymeCOS=HomosapiensGN=LYZPE=1SV=1;tr|F8VV32|F8VV32_HUMANLysozymeCOS=HomosapiensGN=LYZPE=1SV=1;tr|A0A0B4J259|A0A0B4J259_HUMANLysozymeCOS=HomosapiensGN=LYZPE=1SV=1	169850000	160550000	27770000	128780000	1	1897200000	2178600000	1	639180000	5106800000	9.739e+07	1.96436e+09	0.0495786	0.0672092
tr|A0A0C4DGW3|A0A0C4DGW3_HUMANMucin-1OS=HomosapiensGN=MUC1PE=1SV=1;tr|A0A087X2A4|A0A087X2A4_HUMANMucin-1OS=HomosapiensGN=MUC1PE=1SV=1;sp|P15941|MUC1_HUMANMucin-1OS=HomosapiensGN=MUC1PE=1SV=3;tr|A0A087WWM1|A0A087WWM1_HUMANMucin-1OS=HomosapiensGN=MUC1PE=1SV=1;tr|A0A087WVJ0|A0A087WVJ0_HUMANMucin-1(Fragment)OS=HomosapiensGN=MUC1PE=1SV=1;tr|A0A0A0MSH4|A0A0A0MSH4_HUMANMucin-1OS=HomosapiensGN=MUC1PE=1SV…	33965000	1	1	155320000	1	521250000	381610000	1	517300000	1610700000	3.7857e+07	6.06172e+08	0.0624526	0.068584
sp|P05186|PPBT_HUMANAlkalinephosphatase,tissue-nonspecificisozymeOS=HomosapiensGN=ALPLPE=1SV=4;tr|B1ANL0|B1ANL0_HUMANAlkalinephosphatase,tissue-nonspecificisozyme(Fragment)OS=HomosapiensGN=ALPLPE=1SV=2	218060000	24839000	1	4085500	44261000	592850000	568360000	1	3222200000	2507500000	5.82491e+07	1.37818e+09	0.0422652	0.0686475
sp|Q8WUM4|PDC6I_HUMANProgrammedcelldeath6-interactingproteinOS=HomosapiensGN=PDCD6IPPE=1SV=1;tr|F8WEQ7|F8WEQ7_HUMANProgrammedcelldeath6-interactingproteinOS=HomosapiensGN=PDCD6IPPE=1SV=1;tr|F8WBR8|F8WBR8_HUMANProgrammedcelldeath6-interactingproteinOS=HomosapiensGN=PDCD6IPPE=1SV=1;tr|C9IZF9|C9IZF9_HUMANProgrammedcelldeath6-interactingprotein(Fragment)OS=HomosapiensGN=PDCD6IPPE=1SV=1	12689000	1	66892000	23037000	1	80829000	114270000	1	52870000	116400000	2.05236e+07	7.28738e+07	0.281632	0.0690607
sp|P0DOY2|IGLC2_HUMANImmunoglobulinlambdaconstant2OS=HomosapiensGN=IGLC2PE=1SV=1;sp|P0CF74|IGLC6_HUMANImmunoglobulinlambdaconstant6OS=HomosapiensGN=IGLC6PE=1SV=1	4576300000	2115300000	208220000	1808800000	1	1	1	1	66483000	16415000	1.74172e+09	1.65796e+07	105.052	0.0695239
sp|P00558|PGK1_HUMANPhosphoglyceratekinase1OS=HomosapiensGN=PGK1PE=1SV=3;sp|P07205|PGK2_HUMANPhosphoglyceratekinase2OS=HomosapiensGN=PGK2PE=1SV=3	10574000	62234000	35577000	19593000	45510000	108720000	270150000	1	157140000	465970000	34697600	2.00396e+08	0.173145	0.0716519
tr|E7EX53|E7EX53_HUMANRibosomalproteinL15(Fragment)OS=HomosapiensGN=RPL15PE=1SV=1;tr|E7EQV9|E7EQV9_HUMANRibosomalproteinL15(Fragment)OS=HomosapiensGN=RPL15PE=1SV=1;sp|P61313|RL15_HUMAN60SribosomalproteinL15OS=HomosapiensGN=RPL15PE=1SV=2;tr|E7ERA2|E7ERA2_HUMANRibosomalproteinL15OS=HomosapiensGN=RPL15PE=1SV=1;tr|E7ENU7|E7ENU7_HUMANRibosomalproteinL15(Fragment)OS=HomosapiensGN=RPL15PE=1SV=1	1	15361000	1	1	1	15128000	12201000	1	18096000	15717000	3.0722e+06	1.22284e+07	0.251235	0.0728231
sp|P14384|CBPM_HUMANCarboxypeptidaseMOS=HomosapiensGN=CPMPE=1SV=2;tr|F8W111|F8W111_HUMANCarboxypeptidaseM(Fragment)OS=HomosapiensGN=CPMPE=1SV=1;tr|F8VVI6|F8VVI6_HUMANCarboxypeptidaseM(Fragment)OS=HomosapiensGN=CPMPE=1SV=1;tr|H0YHN7|H0YHN7_HUMANCarboxypeptidaseM(Fragment)OS=HomosapiensGN=CPMPE=1SV=1	2591400	34141000	67035000	8579400	14398000	123970000	137240000	1	68855000	74522000	25348960	8.09174e+07	0.31327	0.0728833
sp|P30479|1B41_HUMANHLAclassIhistocompatibilityantigen,B-41alphachainOS=HomosapiensGN=HLA-BPE=1SV=1	9391900	1	1	1	1	9143600	12771000	1	42628000	21797000	1.87838e+06	1.72679e+07	0.108779	0.0736132
sp|Q9H4G4|GAPR1_HUMANGolgi-associatedplantpathogenesis-relatedprotein1OS=HomosapiensGN=GLIPR2PE=1SV=3;tr|Q5VZR0|Q5VZR0_HUMANGolgi-associatedplantpathogenesis-relatedprotein1OS=HomosapiensGN=GLIPR2PE=1SV=1;tr|A0A087WUM5|A0A087WUM5_HUMANGolgi-associatedplantpathogenesis-relatedprotein1OS=HomosapiensGN=GLIPR2PE=1SV=1	22463000	1	1	1	1	70987000	99667000	1	24340000	20284000	4.4926e+06	4.30556e+07	0.104344	0.0750787
sp|P07900|HS90A_HUMANHeatshockproteinHSP90-alphaOS=HomosapiensGN=HSP90AA1PE=1SV=5;tr|G3V2J8|G3V2J8_HUMANHeatshockproteinHSP90-alpha(Fragment)OS=HomosapiensGN=HSP90AA1PE=1SV=1;sp|Q58FG0|HS905_HUMANPutativeheatshockproteinHSP90-alphaA5OS=HomosapiensGN=HSP90AA5PPE=2SV=1;sp|Q14568|HS902_HUMANHeatshockproteinHSP90-alphaA2OS=HomosapiensGN=HSP90AA2PPE=1SV=2;sp|Q58FF6|H90B4_HUMANPutativeheatshockproteinH…	80522000	1	104990000	1	28005000	173780000	180130000	1	138920000	380690000	4.27034e+07	1.74704e+08	0.244433	0.0752415
sp|P06396|GELS_HUMANGelsolinOS=HomosapiensGN=GSNPE=1SV=1;tr|A0A0A0MS51|A0A0A0MS51_HUMANGelsolinOS=HomosapiensGN=GSNPE=1SV=1;tr|A0A0A0MT01|A0A0A0MT01_HUMANGelsolinOS=HomosapiensGN=GSNPE=1SV=1;CON__Q3SX14;tr|A0A0U1RQL8|A0A0U1RQL8_HUMANGelsolin(Fragment)OS=HomosapiensGN=GSNPE=1SV=1;tr|Q5T0H8|Q5T0H8_HUMANGelsolin(Fragment)OS=HomosapiensGN=GSNPE=1SV=2	821420000	233450000	1	94984000	1	734460000	756880000	1	1360600000	1111700000	2.29971e+08	7.92728e+08	0.290101	0.076394
sp|O00560|SDCB1_HUMANSyntenin-1OS=HomosapiensGN=SDCBPPE=1SV=1;tr|G5EA09|G5EA09_HUMANSyndecanbindingprotein(Syntenin),isoformCRA_aOS=HomosapiensGN=SDCBPPE=1SV=1;tr|B4DHN5|B4DHN5_HUMANSyntenin-1OS=HomosapiensGN=SDCBPPE=1SV=1;tr|E9PBU7|E9PBU7_HUMANSyntenin-1OS=HomosapiensGN=SDCBPPE=1SV=1	1	47295000	83359000	65374000	1	209140000	185440000	1	56664000	239330000	3.92056e+07	1.38115e+08	0.283862	0.0807648
sp|Q13421|MSLN_HUMANMesothelinOS=HomosapiensGN=MSLNPE=1SV=2;tr|H3BMA1|H3BMA1_HUMANMesothelin(Fragment)OS=HomosapiensGN=MSLNPE=1SV=2;tr|H3BUX1|H3BUX1_HUMANMesothelin(Fragment)OS=HomosapiensGN=MSLNPE=1SV=1;tr|H3BR90|H3BR90_HUMANMesothelin(Fragment)OS=HomosapiensGN=MSLNPE=1SV=8;tr|H3BV92|H3BV92_HUMANMesothelin(Fragment)OS=HomosapiensGN=MSLNPE=1SV=2	32874000	1	1	1	1	165510000	126780000	1	14679000	49492000	6.5748e+06	7.12922e+07	0.0922233	0.0843374
tr|Q30118|Q30118_HUMANHLAclassIIhistocompatibilityantigen,DRalphachainOS=HomosapiensGN=HLA-DRAPE=1SV=1;tr|A0A0G2JH46|A0A0G2JH46_HUMANHLAclassIIhistocompatibilityantigen,DRalphachainOS=HomosapiensGN=HLA-DRAPE=1SV=1;tr|A0A0G2JMH6|A0A0G2JMH6_HUMANHLAclassIIhistocompatibilityantigen,DRalphachainOS=HomosapiensGN=HLA-DRAPE=1SV=1;sp|P01903|DRA_HUMANHLAclassIIhistocompatibilityantigen,DRalphachainOS=Homo…	1	1	1	1	15801000	48546000	24940000	1	141520000	39047000	3.1602e+06	5.08106e+07	0.0621957	0.0856749
sp|P60174|TPIS_HUMANTriosephosphateisomeraseOS=HomosapiensGN=TPI1PE=1SV=3	11616000	1	1	1	1	42327000	28337000	1	25316000	1	2.3232e+06	1.9196e+07	0.121025	0.0873057
sp|A0A0B4J1X5|HV374_HUMANImmunoglobulinheavyvariable3-74OS=HomosapiensGN=IGHV3-74PE=3SV=1;tr|A0A075B7E8|A0A075B7E8_HUMANImmunoglobulinheavyvariable3/OR16-13(non-functional)(Fragment)OS=HomosapiensGN=IGHV3OR16-13PE=4SV=1	579590000	993790000	651440000	47737000	1	35021000	25709000	1	240990000	84259000	4.54511e+08	7.71958e+07	5.88777	0.0879987
tr|E7ER44|E7ER44_HUMANLactotransferrinOS=HomosapiensGN=LTFPE=1SV=1;sp|P02788|TRFL_HUMANLactotransferrinOS=HomosapiensGN=LTFPE=1SV=6;tr|E7EQB2|E7EQB2_HUMANLactotransferrin(Fragment)OS=HomosapiensGN=LTFPE=1SV=1;tr|C9JCF5|C9JCF5_HUMANLactotransferrin(Fragment)OS=HomosapiensGN=LTFPE=1SV=1	4184100000	28233000000	33672000000	67811000000	3561200000	420200000	426110000	1	15121000000	3780000000	27492260000	3.94946e+09	6.96101	0.088356
sp|P06733|ENOA_HUMANAlpha-enolaseOS=HomosapiensGN=ENO1PE=1SV=2;tr|K7EM90|K7EM90_HUMANAlpha-enolase(Fragment)OS=HomosapiensGN=ENO1PE=1SV=1;tr|K7ERS8|K7ERS8_HUMANAlpha-enolase(Fragment)OS=HomosapiensGN=ENO1PE=1SV=8;tr|F5H1C3|F5H1C3_HUMANGamma-enolase(Fragment)OS=HomosapiensGN=ENO2PE=1SV=1;tr|E5RI09|E5RI09_HUMANBeta-enolase(Fragment)OS=HomosapiensGN=ENO3PE=1SV=1;tr|E5RG95|E5RG95_HUMANBeta-enolase(Fr…	28315000	36144000	1	19707000	1	138710000	60685000	1	65609000	266160000	1.68332e+07	1.06233e+08	0.158456	0.089125
sp|Q9Y624|JAM1_HUMANJunctionaladhesionmoleculeAOS=HomosapiensGN=F11RPE=1SV=1;tr|A0A087WY82|A0A087WY82_HUMANJunctionaladhesionmoleculeAOS=HomosapiensGN=F11RPE=1SV=1	6378500	1	1	1	1	151080000	174180000	1	10214000	28601000	1.2757e+06	7.2815e+07	0.0175198	0.0903496
sp|P0DOY3|IGLC3_HUMANImmunoglobulinlambdaconstant3OS=HomosapiensGN=IGLC3PE=1SV=1	7399000000	229400000	53606000	2682700000	73675000	9033600000	6387700000	14866000	12614000000	6478300000	2087676200	6905693200	0.302312	0.090385
sp|P60953|CDC42_HUMANCelldivisioncontrolprotein42homologOS=HomosapiensGN=CDC42PE=1SV=2;tr|Q5JYX0|Q5JYX0_HUMANCelldivisioncontrolprotein42homolog(Fragment)OS=HomosapiensGN=CDC42PE=1SV=1;tr|F8WET9|F8WET9_HUMANRho-relatedGTP-bindingproteinRhoQOS=HomosapiensGN=RHOQPE=4SV=1;tr|B1AH79|B1AH79_HUMANRas-relatedC3botulinumtoxinsubstrate2OS=HomosapiensGN=RAC2PE=4SV=1;tr|G3V4H1|G3V4H1_HUMANRho-relatedGTP-bin…	9561600	1	1	1	1	16461000	17924000	1	56789000	11665000	1.91232e+06	2.05678e+07	0.0929764	0.0927649
sp|P16070|CD44_HUMANCD44antigenOS=HomosapiensGN=CD44PE=1SV=3;tr|H0YD13|H0YD13_HUMANCD44antigenOS=HomosapiensGN=CD44PE=1SV=2;tr|H0Y2P0|H0Y2P0_HUMANCD44antigen(Fragment)OS=HomosapiensGN=CD44PE=1SV=1;tr|H0YE40|H0YE40_HUMANCD44antigen(Fragment)OS=HomosapiensGN=CD44PE=1SV=1;tr|H0YDW7|H0YDW7_HUMANCD44antigen(Fragment)OS=HomosapiensGN=CD44PE=1SV=1;tr|H0YCV9|H0YCV9_HUMANCD44antigen(Fragment)OS=Homosapien…	129680000	41521000	1	1	1	1126500000	833970000	1	68932000	263710000	3.42402e+07	4.58622e+08	0.0746588	0.0942468
tr|Q5TEC6|Q5TEC6_HUMANHistoneH3OS=HomosapiensGN=HIST2H3PS2PE=1SV=1	1	212360000	148440000	435380000	1	3218500	1	1	30079000	3563900	1.59236e+08	7.37228e+06	21.5993	0.0969688
sp|Q8NFJ5|RAI3_HUMANRetinoicacid-inducedprotein3OS=HomosapiensGN=GPRC5APE=1SV=2;tr|F5GWG3|F5GWG3_HUMANRetinoicacid-inducedprotein3(Fragment)OS=HomosapiensGN=GPRC5APE=1SV=8	253040000	196680000	31316000	1	1	1698100000	3614000000	1	392040000	825440000	9.62072e+07	1.30592e+09	0.0736703	0.0973969
sp|P49913|CAMP_HUMANCathelicidinantimicrobialpeptideOS=HomosapiensGN=CAMPPE=1SV=1;tr|J3KNB4|J3KNB4_HUMANCathelicidinantimicrobialpeptideOS=HomosapiensGN=CAMPPE=1SV=1	48043000	609550000	357440000	1458500000	453320000	1	1	1	503470000	28727000	585370600	1.06439e+08	5.49957	0.0991434
sp|P08311|CATG_HUMANCathepsinGOS=HomosapiensGN=CTSGPE=1SV=2	29830000	15658000000	5742100000	8662200000	141980000	1	1	1	2589100000	16699000	6046822000	5.2116e+08	11.6026	0.0992944
sp|P02763|A1AG1_HUMANAlpha-1-acidglycoprotein1OS=HomosapiensGN=ORM1PE=1SV=1	1460100000	1	1	33195000	86409000	1404300000	905010000	1	1563700000	1530900000	3.15941e+08	1.08078e+09	0.292326	0.0998902
sp|P60709|ACTB_HUMANActin,cytoplasmic1OS=HomosapiensGN=ACTBPE=1SV=1;tr|G5E9R0|G5E9R0_HUMANActin,cytoplasmic1OS=HomosapiensGN=ACTBPE=1SV=1;tr|E7EVS6|E7EVS6_HUMANActin,cytoplasmic1(Fragment)OS=HomosapiensGN=ACTBPE=1SV=8;tr|C9JZR7|C9JZR7_HUMANActin,cytoplasmic1(Fragment)OS=HomosapiensGN=ACTBPE=1SV=8;tr|C9JTX5|C9JTX5_HUMANActin,cytoplasmic1(Fragment)OS=HomosapiensGN=ACTBPE=1SV=1;tr|C9JUM1|C9JUM1_HUMA…	3448700000	1584400000	777860000	1561400000	178830000	4221200000	3943400000	6821800	4150300000	7938000000	1510238000	4051944360	0.372719	0.100857
sp|Q96QR1|SG3A1_HUMANSecretoglobinfamily3Amember1OS=HomosapiensGN=SCGB3A1PE=1SV=2	101130000	1	1	1	1	342520000	166380000	1	2723600000	1838300000	2.0226e+07	1.01416e+09	0.0199436	0.102348
tr|A2A2V1|A2A2V1_HUMANMajorprionprotein(Fragment)OS=HomosapiensGN=PRNPPE=1SV=1;sp|P04156|PRIO_HUMANMajorprionproteinOS=HomosapiensGN=PRNPPE=1SV=1	3642300	1	1	1	1	9743400	9859300	1	5189400	1	728461	4.95842e+06	0.146914	0.104495
sp|P01024|CO3_HUMANComplementC3OS=HomosapiensGN=C3PE=1SV=2;tr|M0QXZ3|M0QXZ3_HUMANComplementC3(Fragment)OS=HomosapiensGN=C3PE=1SV=1;tr|M0QYC8|M0QYC8_HUMANComplementC3(Fragment)OS=HomosapiensGN=C3PE=1SV=1;CON__Q2UVX4;tr|M0R0Q9|M0R0Q9_HUMANComplementC3(Fragment)OS=HomosapiensGN=C3PE=1SV=1;tr|M0R1Q1|M0R1Q1_HUMANComplementC3(Fragment)OS=HomosapiensGN=C3PE=1SV=1;sp|O95568|MET18_HUMANHistidineproteinmet…	12809000000	81491000	40434000	26983000	68382000	10156000000	14205000000	1	7095700000	19031000000	2605258000	1.00975e+10	0.258009	0.105757
tr|H7BXY6|H7BXY6_HUMANTetraspaninOS=HomosapiensGN=TSPAN14PE=1SV=1;sp|Q8NG11|TSN14_HUMANTetraspanin-14OS=HomosapiensGN=TSPAN14PE=1SV=1;tr|A6NEP9|A6NEP9_HUMANTetraspanin(Fragment)OS=HomosapiensGN=TSPAN14PE=1SV=2	1	1	1	1	10371000	18869000	11798000	1	6365700	7312800	2.0742e+06	8.8691e+06	0.233868	0.107948
tr|S4R460|S4R460_HUMANImmunoglobulinheavyvariable3/OR16-9(non-functional)OS=HomosapiensGN=IGHV3OR16-9PE=1SV=2;tr|A0A0B4J2B5|A0A0B4J2B5_HUMANImmunoglobulinheavyvariable3/OR16-9(non-functional)(Fragment)OS=HomosapiensGN=IGHV3OR16-9PE=1SV=1	262870000	136930000	1	212680000	14520000	460620000	312660000	1	955780000	361700000	1.254e+08	4.18152e+08	0.299891	0.11116
tr|E9PP50|E9PP50_HUMANCofilin-1(Fragment)OS=HomosapiensGN=CFL1PE=1SV=8;sp|P23528|COF1_HUMANCofilin-1OS=HomosapiensGN=CFL1PE=1SV=3;tr|E9PS23|E9PS23_HUMANCofilin-1(Fragment)OS=HomosapiensGN=CFL1PE=1SV=8;tr|E9PLJ3|E9PLJ3_HUMANCofilin-1(Fragment)OS=HomosapiensGN=CFL1PE=1SV=1;tr|E9PQB7|E9PQB7_HUMANCofilin-1(Fragment)OS=HomosapiensGN=CFL1PE=1SV=1;tr|G3V1A4|G3V1A4_HUMANCofilin1(Non-muscle),isoformCRA_aO…	24474000	1	1	1	1	74794000	63829000	1	1	32178000	4.8948e+06	3.41602e+07	0.14329	0.111303
sp|P68371|TBB4B_HUMANTubulinbeta-4BchainOS=HomosapiensGN=TUBB4BPE=1SV=1;tr|Q5ST81|Q5ST81_HUMANTubulinbetachainOS=HomosapiensGN=TUBBPE=1SV=1;tr|M0QY85|M0QY85_HUMANTubulinbeta-4Achain(Fragment)OS=HomosapiensGN=TUBB4APE=1SV=1;tr|M0R0X0|M0R0X0_HUMANTubulinbeta-4AchainOS=HomosapiensGN=TUBB4APE=1SV=1;tr|M0QY37|M0QY37_HUMANTubulinbeta-4AchainOS=HomosapiensGN=TUBB4APE=1SV=1;tr|M0QX14|M0QX14_HUMANTubulinb…	313830000	332670000	1	98612000	159380000	515580000	359070000	1	584550000	573880000	1.80898e+08	4.06616e+08	0.444888	0.112076
sp|Q99879|H2B1M_HUMANHistoneH2Btype1-MOS=HomosapiensGN=HIST1H2BMPE=1SV=3;sp|Q99877|H2B1N_HUMANHistoneH2Btype1-NOS=HomosapiensGN=HIST1H2BNPE=1SV=3;sp|Q93079|H2B1H_HUMANHistoneH2Btype1-HOS=HomosapiensGN=HIST1H2BHPE=1SV=3;sp|Q5QNW6|H2B2F_HUMANHistoneH2Btype2-FOS=HomosapiensGN=HIST2H2BFPE=1SV=3;sp|P62807|H2B1C_HUMANHistoneH2Btype1-C/E/F/G/IOS=HomosapiensGN=HIST1H2BCPE=1SV=4;sp|P58876|H2B1D_HUMANHisto…	386610000	10486000000	5142300000	21428000000	1289000000	298360000	223130000	147550000	3272900000	208160000	7746382000	830020000	9.33277	0.114397
tr|C9JUG7|C9JUG7_HUMANF-actin-cappingproteinsubunitalpha-2OS=HomosapiensGN=CAPZA2PE=1SV=1;tr|F8W9N7|F8W9N7_HUMANF-actin-cappingproteinsubunitalpha-2OS=HomosapiensGN=CAPZA2PE=1SV=1;tr|A0A0D9SET8|A0A0D9SET8_HUMANF-actin-cappingproteinsubunitalpha-2OS=HomosapiensGN=CAPZA2PE=1SV=1;sp|P52907|CAZA1_HUMANF-actin-cappingproteinsubunitalpha-1OS=HomosapiensGN=CAPZA1PE=1SV=3;sp|P47755|CAZA2_HUMANF-actin-cap…	1315200	1	1	1	1	4144100	4478500	1	5907600	24840000	263041	7.87404e+06	0.0334061	0.119162
sp|P15144|AMPN_HUMANAminopeptidaseNOS=HomosapiensGN=ANPEPPE=1SV=4;tr|H0YLZ8|H0YLZ8_HUMANAminopeptidaseN(Fragment)OS=HomosapiensGN=ANPEPPE=1SV=1;tr|H0YKT6|H0YKT6_HUMANAminopeptidaseN(Fragment)OS=HomosapiensGN=ANPEPPE=1SV=1	13520000	222090000	30299000	1	1	128470000	129970000	1	605990000	464760000	5.31818e+07	2.65838e+08	0.200053	0.12048
sp|P04196|HRG_HUMANHistidine-richglycoproteinOS=HomosapiensGN=HRGPE=1SV=1	446030000	1	1	1	15323000	714200000	689530000	1	98455000	1739600000	9.22706e+07	6.48357e+08	0.142314	0.122638
tr|Q5JP53|Q5JP53_HUMANTubulinbetachainOS=HomosapiensGN=TUBBPE=1SV=1;sp|P07437|TBB5_HUMANTubulinbetachainOS=HomosapiensGN=TUBBPE=1SV=2;tr|G3V5W4|G3V5W4_HUMANTubulinbeta-3chainOS=HomosapiensGN=TUBB3PE=1SV=1;tr|G3V2R8|G3V2R8_HUMANHCG1983504,isoformCRA_eOS=HomosapiensGN=TUBB3PE=1SV=1;tr|G3V3R4|G3V3R4_HUMANHCG1983504,isoformCRA_cOS=HomosapiensGN=TUBB3PE=1SV=1;tr|G3V2N6|G3V2N6_HUMANHCG1983504,isoformCR…	7376100	1	1	1	1	8677100	16826000	1	1	15979000	1.47522e+06	8.29642e+06	0.177814	0.123003
tr|Q5HY54|Q5HY54_HUMANFilamin-AOS=HomosapiensGN=FLNAPE=1SV=1;tr|Q60FE5|Q60FE5_HUMANFilamin-AOS=HomosapiensGN=FLNAPE=1SV=1;sp|P21333|FLNA_HUMANFilamin-AOS=HomosapiensGN=FLNAPE=1SV=4;tr|A0A087WWY3|A0A087WWY3_HUMANFilamin-AOS=HomosapiensGN=FLNAPE=1SV=1;tr|H0Y5F3|H0Y5F3_HUMANFilamin-A(Fragment)OS=HomosapiensGN=FLNAPE=1SV=1;tr|F8WE98|F8WE98_HUMANFilamin-A(Fragment)OS=HomosapiensGN=FLNAPE=1SV=2;tr|H0Y5…	13475000	1	1	35491000	1	72322000	63395000	1	30077000	228580000	9.7932e+06	7.88748e+07	0.124161	0.123725
sp|P07355|ANXA2_HUMANAnnexinA2OS=HomosapiensGN=ANXA2PE=1SV=2;tr|H0YN42|H0YN42_HUMANAnnexin(Fragment)OS=HomosapiensGN=ANXA2PE=1SV=1;tr|H0YMD0|H0YMD0_HUMANAnnexin(Fragment)OS=HomosapiensGN=ANXA2PE=1SV=1;tr|H0YMU9|H0YMU9_HUMANAnnexinOS=HomosapiensGN=ANXA2PE=1SV=1;sp|A6NMY6|AXA2L_HUMANPutativeannexinA2-likeproteinOS=HomosapiensGN=ANXA2P2PE=5SV=2;tr|H0YKS4|H0YKS4_HUMANAnnexin(Fragment)OS=HomosapiensGN…	194820000	252460000	85374000	54294000	144860000	435830000	577790000	1	185680000	516300000	146361600	3.4312e+08	0.426561	0.123904
tr|K7EMV3|K7EMV3_HUMANHistoneH3OS=HomosapiensGN=H3F3BPE=1SV=1;tr|B4DEB1|B4DEB1_HUMANHistoneH3OS=HomosapiensGN=H3F3APE=1SV=1;tr|K7EK07|K7EK07_HUMANHistoneH3(Fragment)OS=HomosapiensGN=H3F3BPE=1SV=1;sp|Q71DI3|H32_HUMANHistoneH3.2OS=HomosapiensGN=HIST2H3APE=1SV=3;sp|P84243|H33_HUMANHistoneH3.3OS=HomosapiensGN=H3F3APE=1SV=2;sp|P68431|H31_HUMANHistoneH3.1OS=HomosapiensGN=HIST1H3APE=1SV=2;tr|K7ES00|K7ES…	1	4265500000	1474700000	2774900000	55530000	155360000	160390000	1	964150000	172660000	1.71413e+09	2.90512e+08	5.90036	0.126886
tr|H0Y5I3|H0Y5I3_HUMANCholinetransporter-likeprotein4(Fragment)OS=HomosapiensGN=SLC44A4PE=1SV=1;tr|A0A0G2JIN1|A0A0G2JIN1_HUMANCholinetransporter-likeprotein4(Fragment)OS=HomosapiensGN=SLC44A4PE=1SV=1;sp|Q53GD3|CTL4_HUMANCholinetransporter-likeprotein4OS=HomosapiensGN=SLC44A4PE=1SV=2;tr|A0A0G2JL76|A0A0G2JL76_HUMANCholinetransporter-likeprotein4OS=HomosapiensGN=SLC44A4PE=1SV=1	24488000	1	1	24057000	1	34288000	30178000	1	285780000	152950000	9.709e+06	1.00639e+08	0.0964733	0.127542
sp|P29508|SPB3_HUMANSerpinB3OS=HomosapiensGN=SERPINB3PE=1SV=2;sp|P48594|SPB4_HUMANSerpinB4OS=HomosapiensGN=SERPINB4PE=1SV=2;tr|H0Y5H9|H0Y5H9_HUMANSerpinB4(Fragment)OS=HomosapiensGN=SERPINB4PE=1SV=1;tr|C9JZ65|C9JZ65_HUMANSerpinB4(Fragment)OS=HomosapiensGN=SERPINB4PE=1SV=1	1	21350000	1	1	1	31785000	18363000	1	11574000	16342000	4.27e+06	1.56128e+07	0.273494	0.128288
tr|K7EQ48|K7EQ48_HUMANGlucose-6-phosphateisomeraseOS=HomosapiensGN=GPIPE=1SV=2;sp|P06744|G6PI_HUMANGlucose-6-phosphateisomeraseOS=HomosapiensGN=GPIPE=1SV=4;tr|A0A0J9YXP8|A0A0J9YXP8_HUMANGlucose-6-phosphateisomerase(Fragment)OS=HomosapiensGN=GPIPE=1SV=1;tr|A0A0A0MTS2|A0A0A0MTS2_HUMANGlucose-6-phosphateisomerase(Fragment)OS=HomosapiensGN=GPIPE=1SV=1;tr|K7EP41|K7EP41_HUMANGlucose-6-phosphateisomeras…	1	25819000	20061000	40159000	58591000	1	22400000	1	13989000	16608000	2.8926e+07	1.05994e+07	2.72902	0.128848
sp|P61586|RHOA_HUMANTransformingproteinRhoAOS=HomosapiensGN=RHOAPE=1SV=1;tr|Q5JR07|Q5JR07_HUMANRho-relatedGTP-bindingproteinRhoC(Fragment)OS=HomosapiensGN=RHOCPE=1SV=1;tr|C9JNR4|C9JNR4_HUMANTransformingproteinRhoA(Fragment)OS=HomosapiensGN=RHOAPE=1SV=1;tr|E9PQH6|E9PQH6_HUMANRho-relatedGTP-bindingproteinRhoC(Fragment)OS=HomosapiensGN=RHOCPE=1SV=1;tr|C9JX21|C9JX21_HUMANTransformingproteinRhoAOS=Hom…	10177000	1	1	1	1	7216600	5068300	1	68718000	42056000	2.0354e+06	2.46118e+07	0.0827003	0.131978
sp|Q9Y6R7|FCGBP_HUMANIgGFc-bindingproteinOS=HomosapiensGN=FCGBPPE=1SV=3;tr|A0A087WXI2|A0A087WXI2_HUMANIgGFc-bindingproteinOS=HomosapiensGN=FCGBPPE=1SV=1;tr|A0A087WUZ2|A0A087WUZ2_HUMANIgGFc-bindingproteinOS=HomosapiensGN=FCGBPPE=1SV=1	840350000	28713000	35569000	261390000	20496000	620440000	672300000	1	1165200000	2547500000	237303600	1.00109e+09	0.237046	0.132883
sp|O14672|ADA10_HUMANDisintegrinandmetalloproteinasedomain-containingprotein10OS=HomosapiensGN=ADAM10PE=1SV=1;tr|H0YNC5|H0YNC5_HUMANDisintegrinandmetalloproteinasedomain-containingprotein10(Fragment)OS=HomosapiensGN=ADAM10PE=1SV=1	1	1	1	22971000	1	16199000	16456000	1	18109000	21789000	4.5942e+06	1.45106e+07	0.31661	0.133483
tr|E9PN95|E9PN95_HUMANUteroglobinOS=HomosapiensGN=SCGB1A1PE=1SV=1	39094000	1	1	1	1	53977000	52142000	1	74905000	1	7.8188e+06	3.62048e+07	0.21596	0.137335
sp|Q9HC84|MUC5B_HUMANMucin-5BOS=HomosapiensGN=MUC5BPE=1SV=3	4683900000	5439800000	572280000	4526600000	958030000	8991500000	9290400000	1	5756700000	8638000000	3236122000	6.53532e+09	0.495174	0.142445
sp|P04080|CYTB_HUMANCystatin-BOS=HomosapiensGN=CSTBPE=1SV=2;tr|A0A1W2PS52|A0A1W2PS52_HUMANCystatin-BOS=HomosapiensGN=CSTBPE=1SV=1;tr|A0A1W2PQG6|A0A1W2PQG6_HUMANCystatin-B(Fragment)OS=HomosapiensGN=CSTBPE=1SV=1	31607000	1	1	1	1	218920000	250800000	1	1	21329000	6.3214e+06	9.82098e+07	0.0643663	0.142556
tr|E7EQR4|E7EQR4_HUMANEzrinOS=HomosapiensGN=EZRPE=1SV=3;sp|P15311|EZRI_HUMANEzrinOS=HomosapiensGN=EZRPE=1SV=4;tr|E9PQ82|E9PQ82_HUMANRadixin(Fragment)OS=HomosapiensGN=RDXPE=1SV=1;tr|E9PNV3|E9PNV3_HUMANRadixin(Fragment)OS=HomosapiensGN=RDXPE=1SV=1	608310000	1211900000	1384000000	765010000	1	487540000	398190000	1	454990000	515570000	7.93844e+08	3.71258e+08	2.13825	0.144854
tr|C9JVL0|C9JVL0_HUMANSelenium-bindingprotein1(Fragment)OS=HomosapiensGN=SELENBP1PE=1SV=8;tr|F2Z2W8|F2Z2W8_HUMANSelenium-bindingprotein1OS=HomosapiensGN=SELENBP1PE=1SV=1;tr|F8WCR4|F8WCR4_HUMANSelenium-bindingprotein1OS=HomosapiensGN=SELENBP1PE=1SV=1;tr|H0Y532|H0Y532_HUMANSelenium-bindingprotein1(Fragment)OS=HomosapiensGN=SELENBP1PE=1SV=8;sp|Q13228|SBP1_HUMANSelenium-bindingprotein1OS=HomosapiensG…	1	29205000	1	1	1	50812000	72817000	1	29194000	1	5.841e+06	3.05646e+07	0.191103	0.14724
tr|E9PKE3|E9PKE3_HUMANHeatshockcognate71kDaproteinOS=HomosapiensGN=HSPA8PE=1SV=1;sp|P11142|HSP7C_HUMANHeatshockcognate71kDaproteinOS=HomosapiensGN=HSPA8PE=1SV=1;sp|P54652|HSP72_HUMANHeatshock-related70kDaprotein2OS=HomosapiensGN=HSPA2PE=1SV=1;tr|E9PI65|E9PI65_HUMANHeatshockcognate71kDaprotein(Fragment)OS=HomosapiensGN=HSPA8PE=1SV=1;tr|E9PLF4|E9PLF4_HUMANHeatshockcognate71kDaprotein(Fragment)OS=Ho…	6646500	8476600	1	1	1	69756000	25575000	1	36804000	263400000	3.02462e+06	7.9107e+07	0.0382346	0.147528
tr|M0R116|M0R116_HUMANSodium/potassium-transportingATPasesubunitalphaOS=HomosapiensGN=ATP1A3PE=1SV=1;sp|P13637|AT1A3_HUMANSodium/potassium-transportingATPasesubunitalpha-3OS=HomosapiensGN=ATP1A3PE=1SV=3;sp|P05023|AT1A1_HUMANSodium/potassium-transportingATPasesubunitalpha-1OS=HomosapiensGN=ATP1A1PE=1SV=1;tr|A0A0A0MT26|A0A0A0MT26_HUMANSodium/potassium-transportingATPasesubunitalpha-3OS=HomosapiensG…	10043000	39392000	17450000	21251000	33875000	22966000	1	1	21638000	18301000	24402200	1.2581e+07	1.93961	0.15252
sp|P20701|ITAL_HUMANIntegrinalpha-LOS=HomosapiensGN=ITGALPE=1SV=3	988120	1	1	1	1	1	1	1	29060000	21876000	197625	1.01872e+07	0.0193993	0.153986
tr|E7EU05|E7EU05_HUMANPlateletglycoprotein4(Fragment)OS=HomosapiensGN=CD36PE=1SV=2;sp|P16671|CD36_HUMANPlateletglycoprotein4OS=HomosapiensGN=CD36PE=1SV=2;tr|E9PLT1|E9PLT1_HUMANPlateletglycoprotein4OS=HomosapiensGN=CD36PE=1SV=1;tr|E7EX47|E7EX47_HUMANPlateletglycoprotein4(Fragment)OS=HomosapiensGN=CD36PE=1SV=1;tr|E7ERZ9|E7ERZ9_HUMANPlateletglycoprotein4(Fragment)OS=HomosapiensGN=CD36PE=1SV=1;tr|E7E…	1	1	53219000	1	1	32486000	36634000	1	44485000	43814000	1.06438e+07	3.14838e+07	0.338072	0.159238
tr|F8W1R7|F8W1R7_HUMANMyosinlightpolypeptide6OS=HomosapiensGN=MYL6PE=1SV=1;sp|P60660|MYL6_HUMANMyosinlightpolypeptide6OS=HomosapiensGN=MYL6PE=1SV=2;tr|G3V1V0|G3V1V0_HUMANMyosinlightpolypeptide6OS=HomosapiensGN=MYL6PE=1SV=1;tr|J3KND3|J3KND3_HUMANMyosinlightpolypeptide6OS=HomosapiensGN=MYL6PE=1SV=1;tr|G8JLA2|G8JLA2_HUMANMyosinlightpolypeptide6OS=HomosapiensGN=MYL6PE=1SV=1;tr|B7Z6Z4|B7Z6Z4_HUMANMyos…	13793000	1	14913000	1	16101000	51571000	59072000	1	68982000	361090000	8.9614e+06	1.08143e+08	0.0828662	0.162422
sp|P05164|PERM_HUMANMyeloperoxidaseOS=HomosapiensGN=MPOPE=1SV=1	360420000	46550000000	81041000000	79405000000	393360000	30675000	41804000	1	50045000000	887110000	41549956000	1.02009e+10	4.07316	0.164469
tr|E7EM57|E7EM57_HUMANGlucose-6-phosphate1-dehydrogenase(Fragment)OS=HomosapiensGN=G6PDPE=1SV=1;tr|E7EUI8|E7EUI8_HUMANGlucose-6-phosphate1-dehydrogenase(Fragment)OS=HomosapiensGN=G6PDPE=1SV=8;sp|P11413|G6PD_HUMANGlucose-6-phosphate1-dehydrogenaseOS=HomosapiensGN=G6PDPE=1SV=4;tr|E9PD92|E9PD92_HUMANGlucose-6-phosphate1-dehydrogenase(Fragment)OS=HomosapiensGN=G6PDPE=1SV=1	1	34110000	17785000	24209000	1	1	1	1	1	18002000	1.52208e+07	3.6004e+06	4.22753	0.166653
tr|R4GN98|R4GN98_HUMANProteinS100(Fragment)OS=HomosapiensGN=S100A6PE=1SV=1;sp|P06703|S10A6_HUMANProteinS100-A6OS=HomosapiensGN=S100A6PE=1SV=1	1	1	1	18530000	1	17803000	12129000	1	54916000	10439000	3.706e+06	1.90574e+07	0.194465	0.16769
tr|A0A087WWF4|A0A087WWF4_HUMANKanadaptin(Fragment)OS=HomosapiensGN=SLC4A1APPE=1SV=1;tr|A0A087X0M4|A0A087X0M4_HUMANKanadaptinOS=HomosapiensGN=SLC4A1APPE=1SV=1;sp|Q9BWU0|NADAP_HUMANKanadaptinOS=HomosapiensGN=SLC4A1APPE=1SV=1	1	999210000	410650000	130500000	1	1	1	1	96688000	14557000	3.08072e+08	2.2249e+07	13.8466	0.169495
sp|P43652|AFAM_HUMANAfaminOS=HomosapiensGN=AFMPE=1SV=1	8841400	1	1	1	1	65870000	89051000	1	1	1	1.76828e+06	3.09842e+07	0.0570704	0.170599
sp|P0C0L5|CO4B_HUMANComplementC4-BOS=HomosapiensGN=C4BPE=1SV=2;tr|F5GXS0|F5GXS0_HUMANComplementC4-BOS=HomosapiensGN=C4BPE=1SV=1;tr|A0A0G2JL54|A0A0G2JL54_HUMANComplementC4-BOS=HomosapiensGN=C4B_2PE=1SV=1	1334800000	19646000	12400000	39045000	41897000	1716700000	1810800000	1	1373300000	10243000000	289557600	3.02876e+09	0.0956027	0.177198
sp|O14818|PSA7_HUMANProteasomesubunitalphatype-7OS=HomosapiensGN=PSMA7PE=1SV=1;sp|Q8TAA3|PSA7L_HUMANProteasomesubunitalphatype-7-likeOS=HomosapiensGN=PSMA8PE=2SV=3;tr|H0Y586|H0Y586_HUMANProteasomeendopeptidasecomplex(Fragment)OS=HomosapiensGN=PSMA7PE=1SV=1;tr|A0A087WYS6|A0A087WYS6_HUMANProteasomeendopeptidasecomplexOS=HomosapiensGN=PSMA8PE=1SV=1;tr|F5GY34|F5GY34_HUMANProteasomesubunitalphatype-7-…	8016800	1	1	9965900	9265600	11221000	7280000	1	117660000	53170000	5.44966e+06	3.78662e+07	0.143919	0.180869
tr|A0A0G2JPR0|A0A0G2JPR0_HUMANComplementC4-AOS=HomosapiensGN=C4APE=1SV=1;tr|A0A140TA49|A0A140TA49_HUMANComplementC4-AOS=HomosapiensGN=C4APE=1SV=1	14359000	1	1	1	1	43810000	40973000	1	1	5288600	2.8718e+06	1.80143e+07	0.159418	0.183957
sp|P22897|MRC1_HUMANMacrophagemannosereceptor1OS=HomosapiensGN=MRC1PE=1SV=1	13848000	1	1	1	1	35908000	129530000	1	8499400	13092000	2.7696e+06	3.74059e+07	0.0740419	0.186076
sp|P80511|S10AC_HUMANProteinS100-A12OS=HomosapiensGN=S100A12PE=1SV=2	24260000	1257300000	1111800000	8290600000	3363700000	6147700	5181900	1	2732700000	8593800	2809532000	5.50525e+08	5.10337	0.188354
tr|G3V2V8|G3V2V8_HUMANEpididymalsecretoryproteinE1(Fragment)OS=HomosapiensGN=NPC2PE=1SV=1;tr|J3KMY5|J3KMY5_HUMANEpididymalsecretoryproteinE1OS=HomosapiensGN=NPC2PE=1SV=1;sp|P61916|NPC2_HUMANEpididymalsecretoryproteinE1OS=HomosapiensGN=NPC2PE=1SV=1;tr|G3V3E8|G3V3E8_HUMANEpididymalsecretoryproteinE1OS=HomosapiensGN=NPC2PE=1SV=1;tr|E7EMS2|E7EMS2_HUMANEpididymalsecretoryproteinE1OS=HomosapiensGN=NPC2…	11014000	11723000	1	1	1	73170000	146300000	1	9119400	1	4.5474e+06	4.57179e+07	0.0994666	0.190198
sp|P12429|ANXA3_HUMANAnnexinA3OS=HomosapiensGN=ANXA3PE=1SV=3;tr|D6RA82|D6RA82_HUMANAnnexinOS=HomosapiensGN=ANXA3PE=1SV=1;tr|D6RFG5|D6RFG5_HUMANAnnexin(Fragment)OS=HomosapiensGN=ANXA3PE=1SV=1;tr|D6RCA8|D6RCA8_HUMANAnnexin(Fragment)OS=HomosapiensGN=ANXA3PE=1SV=1;tr|D6RFJ9|D6RFJ9_HUMANAnnexinA3(Fragment)OS=HomosapiensGN=ANXA3PE=1SV=1;tr|D6RAZ8|D6RAZ8_HUMANAnnexin(Fragment)OS=HomosapiensGN=ANXA3PE=1S…	20037000	67063000	1	111870000	205220000	54911000	16167000	1	56395000	1	8.0838e+07	2.54946e+07	3.17079	0.191288
tr|H3BTQ8|H3BTQ8_HUMANKunitz-typeproteaseinhibitor1(Fragment)OS=HomosapiensGN=SPINT1PE=1SV=8;tr|H3BVD9|H3BVD9_HUMANKunitz-typeproteaseinhibitor1(Fragment)OS=HomosapiensGN=SPINT1PE=1SV=1;sp|O43278|SPIT1_HUMANKunitz-typeproteaseinhibitor1OS=HomosapiensGN=SPINT1PE=1SV=2;tr|H3BSM2|H3BSM2_HUMANKunitz-typeproteaseinhibitor1(Fragment)OS=HomosapiensGN=SPINT1PE=1SV=1;tr|H3BR01|H3BR01_HUMANKunitz-typeprote…	11967000	1	1	1	1	17546000	16006000	1	10315000	1	2.3934e+06	8.7734e+06	0.272802	0.191609
sp|O75882|ATRN_HUMANAttractinOS=HomosapiensGN=ATRNPE=1SV=2	6430500	1	1	1	1	31560000	27315000	1	1	1	1.2861e+06	1.1775e+07	0.109223	0.191685
sp|P13671|CO6_HUMANComplementcomponentC6OS=HomosapiensGN=C6PE=1SV=3	66959000	1	1	1	1	54041000	30809000	1	32915000	110150000	1.33918e+07	4.5583e+07	0.293789	0.193486
tr|A0A087WVQ9|A0A087WVQ9_HUMANElongationfactor1-alpha1OS=HomosapiensGN=EEF1A1PE=1SV=1;sp|Q5VTE0|EF1A3_HUMANPutativeelongationfactor1-alpha-like3OS=HomosapiensGN=EEF1A1P5PE=5SV=1;sp|P68104|EF1A1_HUMANElongationfactor1-alpha1OS=HomosapiensGN=EEF1A1PE=1SV=1;tr|A6PW80|A6PW80_HUMANElongationfactor1-alpha1(Fragment)OS=HomosapiensGN=EEF1A1PE=4SV=8;tr|Q5JR01|Q5JR01_HUMANElongationfactor1-alpha1(Fragment)…	85205000	140130000	1	1	1	120220000	84596000	1	127080000	210780000	4.5067e+07	1.08535e+08	0.415229	0.193752
sp|P07998|RNAS1_HUMANRibonucleasepancreaticOS=HomosapiensGN=RNASE1PE=1SV=4;tr|G3V357|G3V357_HUMANRibonucleasepancreaticOS=HomosapiensGN=RNASE1PE=1SV=1	1	48810000	1	38599000	1	224440000	162430000	1	35591000	1	1.74818e+07	8.44922e+07	0.206904	0.193984
sp|P01860|IGHG3_HUMANImmunoglobulinheavyconstantgamma3OS=HomosapiensGN=IGHG3PE=1SV=2	1978100000	9563100	1	5350900	154360000	2072400000	2496100000	1	1015300000	758460000	4.29475e+08	1.26845e+09	0.338582	0.196786
sp|P01833|PIGR_HUMANPolymericimmunoglobulinreceptorOS=HomosapiensGN=PIGRPE=1SV=4	22133000000	140770000	171640000	277230000	6533200	7294000000	16735000000	1	27261000000	16235000000	4545834640	1.3505e+10	0.336604	0.198018
sp|A0A0C4DH67|KV108_HUMANImmunoglobulinkappavariable1-8OS=HomosapiensGN=IGKV1-8PE=3SV=1;sp|A0A0C4DH69|KV109_HUMANImmunoglobulinkappavariable1-9OS=HomosapiensGN=IGKV1-9PE=3SV=1;sp|A0A075B6S5|KV127_HUMANImmunoglobulinkappavariable1-27OS=HomosapiensGN=IGKV1-27PE=3SV=1	1	14162000	1	1	1	14670000	10847000	1	11314000	4379900	2.8324e+06	8.24218e+06	0.343647	0.20057
sp|P05109|S10A8_HUMANProteinS100-A8OS=HomosapiensGN=S100A8PE=1SV=1	1	141280000	156580000	237590000	966910000	1	9528800	1	189830000	86690000	3.00472e+08	5.72098e+07	5.25211	0.201697
sp|P36955|PEDF_HUMANPigmentepithelium-derivedfactorOS=HomosapiensGN=SERPINF1PE=1SV=4;tr|I3L4F9|I3L4F9_HUMANPigmentepithelium-derivedfactor(Fragment)OS=HomosapiensGN=SERPINF1PE=1SV=8;tr|I3L107|I3L107_HUMANPigmentepithelium-derivedfactor(Fragment)OS=HomosapiensGN=SERPINF1PE=1SV=1;tr|I3L4N7|I3L4N7_HUMANPigmentepithelium-derivedfactor(Fragment)OS=HomosapiensGN=SERPINF1PE=1SV=1;CON__Q95121;tr|I3L4Z0|I…	1354700	1	1	1	1	22882000	28433000	1	6226900	188520000	270941	4.92124e+07	0.00550554	0.202051
sp|P01859|IGHG2_HUMANImmunoglobulinheavyconstantgamma2OS=HomosapiensGN=IGHG2PE=1SV=2	3795100000	15473000	61265000	26243000	1	6458000000	7017800000	1	1108000000	955940000	7.79616e+08	3.10795e+09	0.250846	0.202171
sp|P13796|PLSL_HUMANPlastin-2OS=HomosapiensGN=LCP1PE=1SV=6;tr|Q5TBN3|Q5TBN3_HUMANPlastin-2(Fragment)OS=HomosapiensGN=LCP1PE=1SV=1;tr|A0A0A0MSQ0|A0A0A0MSQ0_HUMANPlastin-3OS=HomosapiensGN=PLS3PE=1SV=1;sp|P13797|PLST_HUMANPlastin-3OS=HomosapiensGN=PLS3PE=1SV=4;tr|U3KQI3|U3KQI3_HUMANPlastin-3(Fragment)OS=HomosapiensGN=PLS3PE=1SV=1;tr|Q5TBN5|Q5TBN5_HUMANPlastin-2(Fragment)OS=HomosapiensGN=LCP1PE=1SV=1	90643000	101440000	623380000	160490000	181110000	72731000	50179000	1	88691000	214110000	231412600	8.51422e+07	2.71795	0.203546
sp|P62873|GBB1_HUMANGuaninenucleotide-bindingproteinG(I)/G(S)/G(T)subunitbeta-1OS=HomosapiensGN=GNB1PE=1SV=3;tr|F6X3N5|F6X3N5_HUMANGuaninenucleotide-bindingproteinG(I)/G(S)/G(T)subunitbeta-1(Fragment)OS=HomosapiensGN=GNB1PE=1SV=1;tr|F6UT28|F6UT28_HUMANGuaninenucleotide-bindingproteinG(I)/G(S)/G(T)subunitbeta-1(Fragment)OS=HomosapiensGN=GNB1PE=1SV=1;tr|B1AKQ8|B1AKQ8_HUMANGuaninenucleotide-bindingp…	12289000	163860000	58982000	69820000	1	22997000	17436000	1	27213000	33198000	6.09902e+07	2.01688e+07	3.02399	0.20372
tr|F8WDF8|F8WDF8_HUMANProbableUDP-sugartransporterproteinSLC35A5OS=HomosapiensGN=SLC35A5PE=4SV=1;tr|H7BXF8|H7BXF8_HUMANProbableUDP-sugartransporterproteinSLC35A5OS=HomosapiensGN=SLC35A5PE=4SV=1;sp|Q9BS91|S35A5_HUMANProbableUDP-sugartransporterproteinSLC35A5OS=HomosapiensGN=SLC35A5PE=1SV=2	1	155290000	216520000	1166700000	1	1	1	1	31064000	1	3.07702e+08	6.2128e+06	49.5271	0.205983
sp|P62805|H4_HUMANHistoneH4OS=HomosapiensGN=HIST1H4APE=1SV=2	55519000	858330000	1336000000	3590100000	32564000	488310000	525800000	1	240400000	171200000	1174502600	2.85142e+08	4.11901	0.21475
tr|A0A075B7D0|A0A075B7D0_HUMANImmunoglobulinheavyvariable1/OR15-1(non-functional)(Fragment)OS=HomosapiensGN=IGHV1OR15-1PE=1SV=1	32175000	1	1	1	1	10626000	18981000	1	24746000	72494000	6.435e+06	2.53694e+07	0.253652	0.214851
tr|C9J4S4|C9J4S4_HUMANRas-relatedproteinRab-7aOS=HomosapiensGN=RAB7APE=1SV=1;tr|C9J4V0|C9J4V0_HUMANRas-relatedproteinRab-7aOS=HomosapiensGN=RAB7APE=1SV=1;tr|C9J8S3|C9J8S3_HUMANRas-relatedproteinRab-7aOS=HomosapiensGN=RAB7APE=1SV=1;sp|P51149|RAB7A_HUMANRas-relatedproteinRab-7aOS=HomosapiensGN=RAB7APE=1SV=1;tr|C9J7D1|C9J7D1_HUMANRas-relatedproteinRab-7aOS=HomosapiensGN=RAB7APE=1SV=1;tr|C9IZZ0|C9IZZ…	1333700	1	1	1	1	4159400	4910300	1	1	1	266741	1.81394e+06	0.14705	0.214858
sp|P10643|CO7_HUMANComplementcomponentC7OS=HomosapiensGN=C7PE=1SV=2;CON__Q29RQ1	61317000	1	1	1	1	32820000	35333000	1	34663000	68098000	1.22634e+07	3.41828e+07	0.358759	0.216215
sp|O00391|QSOX1_HUMANSulfhydryloxidase1OS=HomosapiensGN=QSOX1PE=1SV=3	12548000	1	1	1	1	1	20937000	1	24889000	129890000	2.5096e+06	3.51432e+07	0.0714107	0.217376
sp|P06312|KV401_HUMANImmunoglobulinkappavariable4-1OS=HomosapiensGN=IGKV4-1PE=1SV=1	1	1	1	375760000	751900000	1	1	1	87258000	29068000	2.25532e+08	2.32652e+07	9.69396	0.218101
sp|P35579|MYH9_HUMANMyosin-9OS=HomosapiensGN=MYH9PE=1SV=4;sp|P35749|MYH11_HUMANMyosin-11OS=HomosapiensGN=MYH11PE=1SV=3;tr|B1AH99|B1AH99_HUMANMyosin-9(Fragment)OS=HomosapiensGN=MYH9PE=1SV=1;tr|Q5BKV1|Q5BKV1_HUMANMYH9proteinOS=HomosapiensGN=MYH9PE=1SV=1;sp|P35580|MYH10_HUMANMyosin-10OS=HomosapiensGN=MYH10PE=1SV=3;sp|Q7Z406|MYH14_HUMANMyosin-14OS=HomosapiensGN=MYH14PE=1SV=2;tr|A0A0C4DFM8|A0A0C4DFM8_…	27127000	49241000	61200000	54037000	143920000	94933000	150200000	1	599500000	2104900000	67105000	5.89907e+08	0.113755	0.220142
tr|A0A0G2JMP8|A0A0G2JMP8_HUMANTransmembranechannel-likeproteinOS=HomosapiensGN=TMC4PE=1SV=1;tr|A0A0G2JMM6|A0A0G2JMM6_HUMANTransmembranechannel-likeproteinOS=HomosapiensGN=TMC4PE=1SV=1;tr|A0A087WVI4|A0A087WVI4_HUMANTransmembranechannel-likeproteinOS=HomosapiensGN=TMC4PE=1SV=1;tr|A0A0G2JPL6|A0A0G2JPL6_HUMANTransmembranechannel-likeproteinOS=HomosapiensGN=TMC4PE=1SV=1;tr|A0A0G2JP95|A0A0G2JP95_HUMANT…	105030000	44668000	111560000	1	1	21449000	21238000	1	12165000	39957000	5.22516e+07	1.89618e+07	2.75562	0.222664
sp|P57078|RIPK4_HUMANReceptor-interactingserine/threonine-proteinkinase4OS=HomosapiensGN=RIPK4PE=1SV=1	1	97316000	131690000	881480000	1	1	1	1	12962000	1	2.22097e+08	2.5924e+06	85.6724	0.224968
sp|A0A0B4J1V0|HV315_HUMANImmunoglobulinheavyvariable3-15OS=HomosapiensGN=IGHV3-15PE=3SV=1	121690000	1	1	1	1	46930000	58845000	1	431370000	115590000	2.4338e+07	1.30547e+08	0.186431	0.227001
tr|K7ERI9|K7ERI9_HUMANApolipoproteinC-I(Fragment)OS=HomosapiensGN=APOC1PE=1SV=1;sp|P02654|APOC1_HUMANApolipoproteinC-IOS=HomosapiensGN=APOC1PE=1SV=1;tr|K7EJI9|K7EJI9_HUMANApolipoproteinC-IOS=HomosapiensGN=APOC1PE=1SV=1;tr|K7ELM9|K7ELM9_HUMANApolipoproteinC-IOS=HomosapiensGN=APOC1PE=1SV=1;tr|K7EPF9|K7EPF9_HUMANApolipoproteinC-IOS=HomosapiensGN=APOC1PE=1SV=1;tr|K7EKP1|K7EKP1_HUMANApolipoproteinC-I(…	23432000	16005000	1	1	69479000	47344000	62471000	1	40555000	248300000	2.17832e+07	7.9734e+07	0.273198	0.235991
sp|P00739|HPTR_HUMANHaptoglobin-relatedproteinOS=HomosapiensGN=HPRPE=2SV=2;tr|A0A0A0MRD9|A0A0A0MRD9_HUMANHaptoglobin-relatedproteinOS=HomosapiensGN=HPRPE=1SV=1	5802400	1	1	1	1	4959100	5543600	1	20346000	1	1.16048e+06	6.16974e+06	0.188092	0.236121
tr|Q5T0I0|Q5T0I0_HUMANGelsolin(Fragment)OS=HomosapiensGN=GSNPE=1SV=1	12736000	1	1	17462000	1	1	1	1	1	5233900	6.0396e+06	1.04678e+06	5.76969	0.238066
sp|P26572|MGAT1_HUMANAlpha-1,3-mannosyl-glycoprotein2-beta-N-acetylglucosaminyltransferaseOS=HomosapiensGN=MGAT1PE=1SV=2	3381400	1	1	1	1	2608700	1	1	2989200	9740900	676281	3.06776e+06	0.220448	0.245177
sp|P01042|KNG1_HUMANKininogen-1OS=HomosapiensGN=KNG1PE=1SV=2	307010000	1	1	1	1	167090000	259800000	1	73235000	358210000	6.1402e+07	1.71667e+08	0.357681	0.248736
sp|Q8WXI7|MUC16_HUMANMucin-16OS=HomosapiensGN=MUC16PE=1SV=3;tr|M0R2S7|M0R2S7_HUMANMucin-16(Fragment)OS=HomosapiensGN=MUC16PE=1SV=1;tr|M0QZZ9|M0QZZ9_HUMANMucin-16(Fragment)OS=HomosapiensGN=MUC16PE=1SV=1;tr|M0R2Y5|M0R2Y5_HUMANMucin-16(Fragment)OS=HomosapiensGN=MUC16PE=1SV=1	554410000	58935000	50070000	54059000	1	207730000	189930000	1	603630000	1426800000	1.43495e+08	4.85618e+08	0.295489	0.248833
sp|P20618|PSB1_HUMANProteasomesubunitbetatype-1OS=HomosapiensGN=PSMB1PE=1SV=2	8750500	1	1	1	18299000	6701400	8264700	1	70233000	23301000	5.4099e+06	2.17e+07	0.249304	0.253102
sp|P01009|A1AT_HUMANAlpha-1-antitrypsinOS=HomosapiensGN=SERPINA1PE=1SV=3;tr|A0A024R6I7|A0A024R6I7_HUMANAlpha-1-antitrypsinOS=HomosapiensGN=SERPINA1PE=1SV=1;tr|A0A0G2JRN3|A0A0G2JRN3_HUMANAlpha-1-antitrypsinOS=HomosapiensGN=SERPINA1PE=1SV=1;tr|G3V2B9|G3V2B9_HUMANAlpha-1-antitrypsin(Fragment)OS=HomosapiensGN=SERPINA1PE=1SV=1;tr|G3V544|G3V544_HUMANAlpha-1-antitrypsin(Fragment)OS=HomosapiensGN=SERPINA…	2620000000	23793000	9407800	7816900	4518200	1335400000	1650900000	1	2374700000	17024000000	533107180	4.477e+09	0.119077	0.25318
tr|H7C1V0|H7C1V0_HUMANCathepsinD(Fragment)OS=HomosapiensGN=CTSDPE=1SV=1;tr|H7C469|H7C469_HUMANUncharacterizedprotein(Fragment)OS=HomosapiensPE=1SV=7;tr|A0A1B0GW44|A0A1B0GW44_HUMANCathepsinDOS=HomosapiensGN=CTSDPE=1SV=1;tr|A0A1B0GV23|A0A1B0GV23_HUMANCathepsinDOS=HomosapiensGN=CTSDPE=1SV=1;tr|A0A1B0GVD5|A0A1B0GVD5_HUMANCathepsinDOS=HomosapiensGN=CTSDPE=1SV=1;tr|A0A1B0GWE8|A0A1B0GWE8_HUMANCathepsinD…	1505500	1	1	1	1	3654500	10004000	1	1	1	301101	2.7317e+06	0.110225	0.253187
sp|P02774|VTDB_HUMANVitaminD-bindingproteinOS=HomosapiensGN=GCPE=1SV=1;tr|D6RBJ7|D6RBJ7_HUMANVitaminD-bindingproteinOS=HomosapiensGN=GCPE=1SV=1;tr|D6RF20|D6RF20_HUMANVitaminD-bindingprotein(Fragment)OS=HomosapiensGN=GCPE=1SV=1;CON__Q3MHN5;CON__ENSEMBL:ENSBTAP00000018229	10254000	1	1	1	1	21858000	28179000	1	1	1	2.0508e+06	1.00074e+07	0.204928	0.258368
sp|P01782|HV309_HUMANImmunoglobulinheavyvariable3-9OS=HomosapiensGN=IGHV3-9PE=1SV=2	47243000	1	1	1	1	24280000	19616000	1	50260000	28564000	9.4486e+06	2.4544e+07	0.384966	0.259186
sp|Q15599|NHRF2_HUMANNa(+)/H(+)exchangeregulatorycofactorNHE-RF2OS=HomosapiensGN=SLC9A3R2PE=1SV=2;tr|H3BUQ9|H3BUQ9_HUMANNa(+)/H(+)exchangeregulatorycofactorNHE-RF2(Fragment)OS=HomosapiensGN=SLC9A3R2PE=1SV=1;tr|H3BN50|H3BN50_HUMANNa(+)/H(+)exchangeregulatorycofactorNHE-RF2(Fragment)OS=HomosapiensGN=SLC9A3R2PE=1SV=1;tr|H3BQS0|H3BQS0_HUMANNa(+)/H(+)exchangeregulatorycofactorNHE-RF2OS=HomosapiensGN=S…	37398000	135340000	1	155780000	1	32101000	46707000	1	29057000	13352000	6.57036e+07	2.42434e+07	2.71016	0.262798
sp|P04083|ANXA1_HUMANAnnexinA1OS=HomosapiensGN=ANXA1PE=1SV=2;tr|Q5T3N1|Q5T3N1_HUMANAnnexin(Fragment)OS=HomosapiensGN=ANXA1PE=1SV=1;tr|Q5T3N0|Q5T3N0_HUMANAnnexin(Fragment)OS=HomosapiensGN=ANXA1PE=1SV=1	46549000	132720000	76814000	112510000	737110000	86040000	38642000	1	129690000	58371000	221140600	6.25486e+07	3.5355	0.262817
sp|P04114|APOB_HUMANApolipoproteinB-100OS=HomosapiensGN=APOBPE=1SV=2;tr|A8MUN2|A8MUN2_HUMANApolipoproteinB-100OS=HomosapiensGN=APOBPE=1SV=2;CON__ENSEMBL:ENSBTAP00000032840	73956000	1	1	1	176640000	1	1	1	18387000	21817000	5.01192e+07	8.0408e+06	6.23311	0.264563
sp|P01857|IGHG1_HUMANImmunoglobulinheavyconstantgamma1OS=HomosapiensGN=IGHG1PE=1SV=1;tr|A0A0A0MS08|A0A0A0MS08_HUMANImmunoglobulinheavyconstantgamma1(Fragment)OS=HomosapiensGN=IGHG1PE=1SV=1;tr|A0A0A0MS07|A0A0A0MS07_HUMANImmunoglobulinheavyconstantgamma1(Fragment)OS=HomosapiensGN=IGHG1PE=1SV=1	24913000000	102020000	68431000	40355000	15200000	16587000000	18835000000	1	14319000000	11186000000	5027801200	1.21854e+10	0.412609	0.264579
sp|P04275|VWF_HUMANvonWillebrandfactorOS=HomosapiensGN=VWFPE=1SV=4	59130000	16426000	1	1	1	1	1	1	1	6572700	1.51112e+07	1.31454e+06	11.4954	0.265737
sp|Q9BYL1|SAM10_HUMANSterilealphamotifdomain-containingprotein10OS=HomosapiensGN=SAMD10PE=2SV=1	13357000	1	1	1	1	24244000	103230000	1	4514700	1	2.6714e+06	2.63977e+07	0.101198	0.267396
sp|A0A0C4DH68|KV224_HUMANImmunoglobulinkappavariable2-24OS=HomosapiensGN=IGKV2-24PE=3SV=1;tr|A0A075B6R9|A0A075B6R9_HUMANImmunoglobulinkappavariable2D-24(non-functional)(Fragment)OS=HomosapiensGN=IGKV2D-24PE=4SV=1	38871000	9613600	13577000	14663000	1	32296000	48586000	1	297050000	25312000	1.53449e+07	8.06488e+07	0.190268	0.269468
sp|P63104|1433Z_HUMAN14-3-3proteinzeta/deltaOS=HomosapiensGN=YWHAZPE=1SV=1;tr|E7EX29|E7EX29_HUMAN14-3-3proteinzeta/delta(Fragment)OS=HomosapiensGN=YWHAZPE=1SV=1;tr|E7ESK7|E7ESK7_HUMAN14-3-3proteinzeta/delta(Fragment)OS=HomosapiensGN=YWHAZPE=1SV=1;tr|B0AZS6|B0AZS6_HUMAN14-3-3proteinzeta/deltaOS=HomosapiensGN=YWHAZPE=1SV=1;tr|E5RGE1|E5RGE1_HUMAN14-3-3proteinzeta/delta(Fragment)OS=HomosapiensGN=YWHA…	126850000	1	1	1	52686000	154300000	202450000	1	46174000	45586000	3.59072e+07	8.9702e+07	0.400294	0.269892
sp|P01699|LV144_HUMANImmunoglobulinlambdavariable1-44OS=HomosapiensGN=IGLV1-44PE=1SV=2	8219500	1	1	1	1	16965000	19345000	1	1	1	1.6439e+06	7.262e+06	0.22637	0.271428
sp|P01834|IGKC_HUMANImmunoglobulinkappaconstantOS=HomosapiensGN=IGKCPE=1SV=2	16026000000	106830000	90432000	744760000	498600000	8324500000	9033400000	1	14329000000	8733800000	3493324400	8.08414e+09	0.432121	0.271638
tr|C9JIS1|C9JIS1_HUMANGuaninenucleotide-bindingproteinG(I)/G(S)/G(T)subunitbeta-2(Fragment)OS=HomosapiensGN=GNB2PE=1SV=1	14448000	224250000	155900000	145530000	1	105300000	78104000	1	57508000	22356000	1.08026e+08	5.26536e+07	2.05163	0.275527
sp|Q12805|FBLN3_HUMANEGF-containingfibulin-likeextracellularmatrixprotein1OS=HomosapiensGN=EFEMP1PE=1SV=2;tr|A0A0U1RQV3|A0A0U1RQV3_HUMANEGF-containingfibulin-likeextracellularmatrixprotein1(Fragment)OS=HomosapiensGN=EFEMP1PE=1SV=1;tr|Q580Q6|Q580Q6_HUMANEGF-containingfibulin-likeextracellularmatrixprotein1(Fragment)OS=HomosapiensGN=EFEMP1PE=1SV=1;tr|C9JQX7|C9JQX7_HUMANEGF-containingfibulin-likeext…	217280000	1	53893000	112560000	1	243810000	240910000	1	56458000	230880000	7.67466e+07	1.54412e+08	0.497026	0.275591
tr|R4GN83|R4GN83_HUMANBasigin(Fragment)OS=HomosapiensGN=BSGPE=1SV=1;tr|R4GMX5|R4GMX5_HUMANBasigin(Fragment)OS=HomosapiensGN=BSGPE=1SV=1;tr|I3L192|I3L192_HUMANBasigin(Fragment)OS=HomosapiensGN=BSGPE=1SV=8;tr|A0A087WUV8|A0A087WUV8_HUMANBasiginOS=HomosapiensGN=BSGPE=1SV=1;tr|A0A087X2B5|A0A087X2B5_HUMANBasigin(Fragment)OS=HomosapiensGN=BSGPE=1SV=1;sp|P35613|BASI_HUMANBasiginOS=HomosapiensGN=BSGPE=1SV…	7896400	1	1	1	1	18190000	15572000	1	1	1	1.57928e+06	6.7524e+06	0.233884	0.278098
sp|P14618|KPYM_HUMANPyruvatekinasePKMOS=HomosapiensGN=PKMPE=1SV=4;tr|H3BTN5|H3BTN5_HUMANPyruvatekinase(Fragment)OS=HomosapiensGN=PKMPE=1SV=1;tr|H3BQ34|H3BQ34_HUMANPyruvatekinaseOS=HomosapiensGN=PKMPE=1SV=1;tr|B4DNK4|B4DNK4_HUMANPyruvatekinaseOS=HomosapiensGN=PKMPE=1SV=1;tr|H3BT25|H3BT25_HUMANPyruvatekinasePKM(Fragment)OS=HomosapiensGN=PKMPE=1SV=1;tr|H3BUW1|H3BUW1_HUMANPyruvatekinasePKM(Fragment)O…	323990000	12931000	1	15371000	1	93505000	72840000	1	422470000	382980000	7.04584e+07	1.94359e+08	0.362517	0.282124
sp|A0A0C4DH72|KV106_HUMANImmunoglobulinkappavariable1-6OS=HomosapiensGN=IGKV1-6PE=3SV=1;sp|P01599|KV117_HUMANImmunoglobulinkappavariable1-17OS=HomosapiensGN=IGKV1-17PE=1SV=2	46710000	1	1	1	1	38080000	34748000	1	59420000	1	9.342e+06	2.64496e+07	0.3532	0.283852
tr|H0Y9Q1|H0Y9Q1_HUMANCytosolaminopeptidase(Fragment)OS=HomosapiensGN=LAP3PE=1SV=8;sp|P28838|AMPL_HUMANCytosolaminopeptidaseOS=HomosapiensGN=LAP3PE=1SV=3	2654700	1	1	1	1	1	1	1	4303600	9481500	530941	2.75702e+06	0.192578	0.286651
sp|P06310|KV230_HUMANImmunoglobulinkappavariable2-30OS=HomosapiensGN=IGKV2-30PE=3SV=2;sp|A0A075B6S6|KVD30_HUMANImmunoglobulinkappavariable2D-30OS=HomosapiensGN=IGKV2D-30PE=3SV=1;sp|A2NJV5|KV229_HUMANImmunoglobulinkappavariable2-29OS=HomosapiensGN=IGKV2-29PE=3SV=2;sp|A0A0A0MRZ7|KVD26_HUMANImmunoglobulinkappavariable2D-26OS=HomosapiensGN=IGKV2D-26PE=3SV=1;sp|A0A075B6S2|KVD29_HUMANImmunoglobulinkapp…	362710000	1	1	1	1	129460000	159940000	1	511010000	197900000	7.2542e+07	1.99662e+08	0.363324	0.287152
sp|Q29940|1B59_HUMANHLAclassIhistocompatibilityantigen,B-59alphachainOS=HomosapiensGN=HLA-BPE=1SV=1;sp|P30493|1B55_HUMANHLAclassIhistocompatibilityantigen,B-55alphachainOS=HomosapiensGN=HLA-BPE=1SV=1;sp|P30495|1B56_HUMANHLAclassIhistocompatibilityantigen,B-56alphachainOS=HomosapiensGN=HLA-BPE=1SV=1;sp|Q29718|1B82_HUMANHLAclassIhistocompatibilityantigen,B-82alphachainOS=HomosapiensGN=HLA-BPE=1SV=1…	1	49866000	1	9561900	1	28899000	22216000	1	178610000	22085000	1.18856e+07	5.0362e+07	0.236003	0.288492
sp|A0A0C4DH25|KVD20_HUMANImmunoglobulinkappavariable3D-20OS=HomosapiensGN=IGKV3D-20PE=3SV=1	137340000	1	1	1	1	72437000	67340000	1	77862000	100230000	2.7468e+07	6.35738e+07	0.432065	0.29507
sp|P06727|APOA4_HUMANApolipoproteinA-IVOS=HomosapiensGN=APOA4PE=1SV=3;CON__Q32PJ2	247560000	495110000	46538000	560100000	68893000	305860000	280150000	1	6323700000	1199100000	283640200	1.62176e+09	0.174896	0.296189
sp|P15291|B4GT1_HUMANBeta-1,4-galactosyltransferase1OS=HomosapiensGN=B4GALT1PE=1SV=5	8733400	1	1	1	1	1	15302000	1	1	18070000	1.74668e+06	6.6744e+06	0.261699	0.301971
sp|A0A075B6I0|LV861_HUMANImmunoglobulinlambdavariable8-61OS=HomosapiensGN=IGLV8-61PE=3SV=7	539140000	1	1	1	1	168960000	182550000	1	1255500000	290090000	1.07828e+08	3.7942e+08	0.284192	0.306242
sp|O75923|DYSF_HUMANDysferlinOS=HomosapiensGN=DYSFPE=1SV=1	1	1	9542600	1	46434000	1	1	1	6319500	1	1.11953e+07	1.2639e+06	8.85775	0.306375
sp|P29401|TKT_HUMANTransketolaseOS=HomosapiensGN=TKTPE=1SV=3;tr|A0A0B4J1R6|A0A0B4J1R6_HUMANTransketolaseOS=HomosapiensGN=TKTPE=1SV=1;tr|E9PFF2|E9PFF2_HUMANTransketolaseOS=HomosapiensGN=TKTPE=1SV=1;tr|F8WAX4|F8WAX4_HUMANTransketolaseOS=HomosapiensGN=TKTPE=1SV=1;tr|F8W888|F8W888_HUMANTransketolaseOS=HomosapiensGN=TKTPE=1SV=1	9430600	17765000	14897000	70747000	56413000	1	1	1	61570000	14660000	33850520	1.5246e+07	2.22029	0.311368
tr|J3QSF7|J3QSF7_HUMANMyeloperoxidase(Fragment)OS=HomosapiensGN=MPOPE=1SV=8	1	137970000	257770000	261340000	1	1	1	1	246080000	1	1.31416e+08	4.9216e+07	2.67019	0.311652
sp|P80188|NGAL_HUMANNeutrophilgelatinase-associatedlipocalinOS=HomosapiensGN=LCN2PE=1SV=2;tr|X6R8F3|X6R8F3_HUMANNeutrophilgelatinase-associatedlipocalinOS=HomosapiensGN=LCN2PE=1SV=1	21831000	1	166340000	51851000	1	6108400	5242400	1	48410000	6057400	4.80044e+07	1.31636e+07	3.64674	0.312454
tr|A0A0G2JMB2|A0A0G2JMB2_HUMANImmunoglobulinheavyconstantalpha2(Fragment)OS=HomosapiensGN=IGHA2PE=1SV=1;sp|P01877|IGHA2_HUMANImmunoglobulinheavyconstantalpha2OS=HomosapiensGN=IGHA2PE=1SV=4	3702500000	1	1	152960000	1	2546100000	2636600000	1	1995000000	1407900000	7.71092e+08	1.71712e+09	0.449061	0.312611
tr|E9PNW4|E9PNW4_HUMANCD59glycoproteinOS=HomosapiensGN=CD59PE=1SV=1;sp|P13987|CD59_HUMANCD59glycoproteinOS=HomosapiensGN=CD59PE=1SV=1;tr|E9PR17|E9PR17_HUMANCD59glycoproteinOS=HomosapiensGN=CD59PE=1SV=1;tr|H0YET2|H0YET2_HUMANCD59glycoprotein(Fragment)OS=HomosapiensGN=CD59PE=1SV=1	6343700000	56010000	1	8248900	1	3685500000	5211600000	1	2274800000	3435000000	1.28159e+09	2.92138e+09	0.438694	0.316352
sp|P01861|IGHG4_HUMANImmunoglobulinheavyconstantgamma4OS=HomosapiensGN=IGHG4PE=1SV=1	139500000	1	1	1	1	211870000	175140000	1	9599200	25782000	2.79e+07	8.44782e+07	0.330263	0.316993
sp|P02794|FRIH_HUMANFerritinheavychainOS=HomosapiensGN=FTH1PE=1SV=2;tr|G3V1D1|G3V1D1_HUMANFerritinOS=HomosapiensGN=FTH1PE=1SV=1;tr|G3V192|G3V192_HUMANFerritinOS=HomosapiensGN=FTH1PE=1SV=1;tr|E9PQR3|E9PQR3_HUMANFerritinOS=HomosapiensGN=FTH1PE=1SV=1;tr|E9PKM5|E9PKM5_HUMANFerritinheavychainOS=HomosapiensGN=FTH1PE=1SV=1;tr|E9PRK8|E9PRK8_HUMANFerritinOS=HomosapiensGN=FTH1PE=1SV=1;tr|E9PK45|E9PK45_HUMA…	9201000	1	12457000	1	1	1	1	1	39068000	394300000	4.3316e+06	8.66736e+07	0.049976	0.318011
sp|P29622|KAIN_HUMANKallistatinOS=HomosapiensGN=SERPINA4PE=1SV=3	1	19282000	1	1	1	4277100	7649500	1	10205000	109000000	3.8564e+06	2.62263e+07	0.147043	0.320426
tr|D6RF35|D6RF35_HUMANVitaminD-bindingproteinOS=HomosapiensGN=GCPE=1SV=1	1590600000	1	1	197530000	1	2343600000	2546500000	1	71526000	270870000	3.57626e+08	1.0465e+09	0.341736	0.321768
sp|P03973|SLPI_HUMANAntileukoproteinaseOS=HomosapiensGN=SLPIPE=1SV=2	546450000	271830000	71540000	524870000	1	448300000	881150000	1	848180000	298620000	2.82938e+08	4.9525e+08	0.571303	0.322935
sp|Q16378|PROL4_HUMANProline-richprotein4OS=HomosapiensGN=PRR4PE=1SV=3;tr|A0A087WY73|A0A087WY73_HUMANProline-richprotein4OS=HomosapiensGN=PRR4PE=4SV=1	255180000	1	1	1	1	394600000	225680000	1	1	110570000	5.1036e+07	1.4617e+08	0.349155	0.324331
sp|P63261|ACTG_HUMANActin,cytoplasmic2OS=HomosapiensGN=ACTG1PE=1SV=1;tr|I3L3I0|I3L3I0_HUMANActin,cytoplasmic2(Fragment)OS=HomosapiensGN=ACTG1PE=1SV=1;tr|I3L1U9|I3L1U9_HUMANActin,cytoplasmic2(Fragment)OS=HomosapiensGN=ACTG1PE=1SV=1;tr|I3L3R2|I3L3R2_HUMANActin,cytoplasmic2(Fragment)OS=HomosapiensGN=ACTG1PE=1SV=1;tr|J3KT65|J3KT65_HUMANActin,cytoplasmic2OS=HomosapiensGN=ACTG1PE=1SV=1;tr|I3L4N8|I3L4N8…	15015000	1	1	1	1	24426000	27490000	1	1	1	3.003e+06	1.03832e+07	0.289217	0.325675
sp|Q14508|WFDC2_HUMANWAPfour-disulfidecoredomainprotein2OS=HomosapiensGN=WFDC2PE=1SV=2	34936000	1	1	1	1	54702000	67001000	1	1	1	6.9872e+06	2.43406e+07	0.28706	0.325754
sp|Q9BYV2|TRI54_HUMANTripartitemotif-containingprotein54OS=HomosapiensGN=TRIM54PE=1SV=3	10509000	8266900000	201770000	96525000	1	1	1	1	5371400	3681300	1.71514e+09	1.81054e+06	947.309	0.326233
tr|Q5T985|Q5T985_HUMANInter-alpha-trypsininhibitorheavychainH2OS=HomosapiensGN=ITIH2PE=1SV=1;sp|P19823|ITIH2_HUMANInter-alpha-trypsininhibitorheavychainH2OS=HomosapiensGN=ITIH2PE=1SV=2;tr|Q5T987|Q5T987_HUMANInter-alpha-trypsininhibitorheavychainH2(Fragment)OS=HomosapiensGN=ITIH2PE=1SV=1;CON__Q9TRI1	706360000	32049000	12107000	1	10981000	273390000	233740000	1	293490000	1873000000	1.52299e+08	5.34724e+08	0.284819	0.326549
sp|P11678|PERE_HUMANEosinophilperoxidaseOS=HomosapiensGN=EPXPE=1SV=2	73383000	16186000000	1335900000	289060000	67257000	58349000	1	1	1419800000	43049000	3590320000	3.0424e+08	11.801	0.330221
sp|P30453|1A34_HUMANHLAclassIhistocompatibilityantigen,A-34alphachainOS=HomosapiensGN=HLA-APE=1SV=1;sp|P30457|1A66_HUMANHLAclassIhistocompatibilityantigen,A-66alphachainOS=HomosapiensGN=HLA-APE=1SV=1;tr|A0A140T8W8|A0A140T8W8_HUMANHLAclassIhistocompatibilityantigen,A-3alphachainOS=HomosapiensGN=HLA-APE=1SV=1;tr|A0A1W2PR61|A0A1W2PR61_HUMANHLAclassIhistocompatibilityantigen,A-3alphachainOS=Homosapie…	85190000	86014000	132690000	75193000	1	92785000	71911000	1	397790000	183250000	7.58174e+07	1.49147e+08	0.508339	0.337974
tr|F8WCZ6|F8WCZ6_HUMANComplementC1ssubcomponentOS=HomosapiensGN=C1SPE=1SV=1;tr|A0A087X232|A0A087X232_HUMANComplementC1ssubcomponentOS=HomosapiensGN=C1SPE=1SV=1;sp|P09871|C1S_HUMANComplementC1ssubcomponentOS=HomosapiensGN=C1SPE=1SV=1	187020000	33842000	1	1	1	7169000	7566900	1	9429200	12760000	4.41724e+07	7.38502e+06	5.98135	0.341381
sp|P11684|UTER_HUMANUteroglobinOS=HomosapiensGN=SCGB1A1PE=1SV=1	12100000000	422780000	1	120910000	101440000	14677000000	16305000000	1	2645600000	639840000	2.54903e+09	6.85349e+09	0.371931	0.34498
tr|G3V3I1|G3V3I1_HUMANProteasomesubunitalphatypeOS=HomosapiensGN=PSMA6PE=1SV=1;tr|G3V295|G3V295_HUMANProteasomesubunitalphatypeOS=HomosapiensGN=PSMA6PE=1SV=1;sp|P60900|PSA6_HUMANProteasomesubunitalphatype-6OS=HomosapiensGN=PSMA6PE=1SV=1;tr|G3V5Z7|G3V5Z7_HUMANProteasomesubunitalphatypeOS=HomosapiensGN=PSMA6PE=1SV=1;tr|G3V3U4|G3V3U4_HUMANProteasomesubunitalphatypeOS=HomosapiensGN=PSMA6PE=1SV=1;tr|G…	19822000	1	1	38129000	1	15166000	23723000	1	59169000	21969000	1.15902e+07	2.40054e+07	0.482816	0.345663
sp|Q15828|CYTM_HUMANCystatin-MOS=HomosapiensGN=CST6PE=1SV=1	6533700	1	1	1	1	9699400	11338000	1	1	1	1.30674e+06	4.20748e+06	0.310576	0.346566
tr|J3KRY2|J3KRY2_HUMANTestis-expressedprotein2(Fragment)OS=HomosapiensGN=TEX2PE=1SV=1;tr|J3QKY0|J3QKY0_HUMANTestis-expressedprotein2(Fragment)OS=HomosapiensGN=TEX2PE=1SV=1;tr|A0A087WVA8|A0A087WVA8_HUMANTestis-expressedprotein2OS=HomosapiensGN=TEX2PE=1SV=1;sp|Q8IWB9|TEX2_HUMANTestis-expressedprotein2OS=HomosapiensGN=TEX2PE=1SV=2	398740000	17371000	8272900	1	1	12039000	6178000	1	13312000	1	8.48768e+07	6.3058e+06	13.4601	0.346662
sp|O00602|FCN1_HUMANFicolin-1OS=HomosapiensGN=FCN1PE=1SV=2;tr|A0A087WVE2|A0A087WVE2_HUMANFicolin-1OS=HomosapiensGN=FCN1PE=1SV=1	1	1	1	1	26443000	1	1	1	25149000	125110000	5.2886e+06	3.00518e+07	0.175983	0.347787
tr|A0A024RA52|A0A024RA52_HUMANProteasomesubunitalphatypeOS=HomosapiensGN=PSMA2PE=1SV=1;sp|P25787|PSA2_HUMANProteasomesubunitalphatype-2OS=HomosapiensGN=PSMA2PE=1SV=2	14001000	1	1	1	1	1	1	1	31378000	17240000	2.8002e+06	9.7236e+06	0.28798	0.348298
tr|Q6P163|Q6P163_HUMANAPOC2proteinOS=HomosapiensGN=APOC2PE=1SV=1;tr|A0A024R0T9|A0A024R0T9_HUMANApolipoproteinC-IIisoform1OS=HomosapiensGN=APOC2PE=1SV=1;sp|P02655|APOC2_HUMANApolipoproteinC-IIOS=HomosapiensGN=APOC2PE=1SV=1;tr|K7ER74|K7ER74_HUMANAPOC4-APOC2readthrough(NMDcandidate)OS=HomosapiensGN=APOC4-APOC2PE=1SV=1;tr|V9GYJ8|V9GYJ8_HUMANApolipoproteinC-IIOS=HomosapiensGN=APOC2PE=4SV=1	271440000	1	1	1	1	1	2376300	1	1	1	5.4288e+07	475261	114.228	0.350614
tr|E9PRJ3|E9PRJ3_HUMANTetraspanin(Fragment)OS=HomosapiensGN=CD151PE=1SV=1;tr|E9PMR4|E9PMR4_HUMANTetraspaninOS=HomosapiensGN=CD151PE=1SV=1;sp|P48509|CD151_HUMANCD151antigenOS=HomosapiensGN=CD151PE=1SV=3	1	1	1	1	41354000	1	1	1	54798000	80330000	8.2708e+06	2.70256e+07	0.306036	0.350986
tr|Q53FA3|Q53FA3_HUMANHSPA1L(Fragment)OS=HomosapiensGN=HSPA1LPE=1SV=1;sp|P34931|HS71L_HUMANHeatshock70kDaprotein1-likeOS=HomosapiensGN=HSPA1LPE=1SV=2	6429500	1	1	1	1	11866000	8745200	1	1	1	1.2859e+06	4.12224e+06	0.311942	0.352858
sp|P09210|GSTA2_HUMANGlutathioneS-transferaseA2OS=HomosapiensGN=GSTA2PE=1SV=4;sp|P08263|GSTA1_HUMANGlutathioneS-transferaseA1OS=HomosapiensGN=GSTA1PE=1SV=3;tr|Q5JW85|Q5JW85_HUMANGlutathioneS-transferaseA3OS=HomosapiensGN=GSTA3PE=1SV=1;sp|Q16772|GSTA3_HUMANGlutathioneS-transferaseA3OS=HomosapiensGN=GSTA3PE=1SV=3	1	1	1	81921000	30699000	66747000	78674000	1	20397000	53293000	2.2524e+07	4.38222e+07	0.513986	0.355053
sp|P50148|GNAQ_HUMANGuaninenucleotide-bindingproteinG(q)subunitalphaOS=HomosapiensGN=GNAQPE=1SV=4;tr|B1AM21|B1AM21_HUMANGuaninenucleotide-bindingproteinG(q)subunitalpha(Fragment)OS=HomosapiensGN=GNAQPE=1SV=1;sp|O95837|GNA14_HUMANGuaninenucleotide-bindingproteinsubunitalpha-14OS=HomosapiensGN=GNA14PE=1SV=1	4636800	11365000	30208000	12298000	1	15264000	45044000	1	8466900	39931000	1.17016e+07	2.17412e+07	0.538221	0.355303
sp|P19827|ITIH1_HUMANInter-alpha-trypsininhibitorheavychainH1OS=HomosapiensGN=ITIH1PE=1SV=3;tr|F8WAS2|F8WAS2_HUMANInter-alpha-trypsininhibitorheavychainH1OS=HomosapiensGN=ITIH1PE=1SV=1;tr|H7C0N0|H7C0N0_HUMANInter-alpha-trypsininhibitorheavychainH1(Fragment)OS=HomosapiensGN=ITIH1PE=1SV=1;CON__Q0VCM5;tr|H7C5I0|H7C5I0_HUMANInter-alpha-trypsininhibitorheavychainH1(Fragment)OS=HomosapiensGN=ITIH1PE=1S…	290100000	170590000	37119000	1	1	149360000	276580000	1	160060000	292560000	9.95618e+07	1.75712e+08	0.566619	0.355708
sp|P01718|LV327_HUMANImmunoglobulinlambdavariable3-27OS=HomosapiensGN=IGLV3-27PE=1SV=2;sp|A0A075B6K0|LV316_HUMANImmunoglobulinlambdavariable3-16OS=HomosapiensGN=IGLV3-16PE=3SV=2	64089000	1	1	1	1	1	1670700	1	1	1	1.28178e+07	334141	38.3605	0.35877
sp|A0A0C4DH43|HV70D_HUMANImmunoglobulinheavyvariable2-70DOS=HomosapiensGN=IGHV2-70DPE=3SV=1;tr|A0A0J9YVU5|A0A0J9YVU5_HUMANImmunoglobulinheavyvariable2-70(Fragment)OS=HomosapiensGN=IGHV2-70PE=4SV=1;sp|P01814|HV270_HUMANImmunoglobulinheavyvariable2-70OS=HomosapiensGN=IGHV2-70PE=1SV=2;sp|A0A0B4J1V2|HV226_HUMANImmunoglobulinheavyvariable2-26OS=HomosapiensGN=IGHV2-26PE=3SV=1	4480400	1	1	10699000	1	1	1	1	97244000	11046000	3.03588e+06	2.1658e+07	0.140174	0.358914
tr|H0YNA7|H0YNA7_HUMANSignalpeptidepeptidase-like2A(Fragment)OS=HomosapiensGN=SPPL2APE=1SV=8;sp|Q8TCT8|SPP2A_HUMANSignalpeptidepeptidase-like2AOS=HomosapiensGN=SPPL2APE=1SV=2	1	1	12165000	7147300	1	1	1	1	46468000	18676000	3.86246e+06	1.30288e+07	0.296456	0.360176
sp|P01023|A2MG_HUMANAlpha-2-macroglobulinOS=HomosapiensGN=A2MPE=1SV=3;sp|P20742|PZP_HUMANPregnancyzoneproteinOS=HomosapiensGN=PZPPE=1SV=4;tr|F8W7L3|F8W7L3_HUMANAlpha-2-macroglobulin(Fragment)OS=HomosapiensGN=A2MPE=1SV=1;CON__ENSEMBL:ENSBTAP00000024146	12312000000	236890000	206220000	198050000	4786600000	2389100000	3002300000	1	30361000000	11350000000	3547952000	9.42048e+09	0.376621	0.360532
tr|F2Z3H1|F2Z3H1_HUMANUTP--glucose-1-phosphateuridylyltransferaseOS=HomosapiensGN=UGP2PE=1SV=1;tr|C9JTZ5|C9JTZ5_HUMANUTP--glucose-1-phosphateuridylyltransferase(Fragment)OS=HomosapiensGN=UGP2PE=1SV=8;tr|C9JUW1|C9JUW1_HUMANUTP--glucose-1-phosphateuridylyltransferase(Fragment)OS=HomosapiensGN=UGP2PE=1SV=1;tr|C9JWG0|C9JWG0_HUMANUTP--glucose-1-phosphateuridylyltransferase(Fragment)OS=HomosapiensGN=UG…	6495400	1	1	1	1	1	1	1	12205000	8259300	1.29908e+06	4.09286e+06	0.317402	0.36218
sp|O60635|TSN1_HUMANTetraspanin-1OS=HomosapiensGN=TSPAN1PE=1SV=2	1	168650000	232310000	250300000	1	1	1	1	114010000	205280000	1.30252e+08	6.3858e+07	2.03971	0.363542
sp|P02787|TRFE_HUMANSerotransferrinOS=HomosapiensGN=TFPE=1SV=3;tr|H7C5E8|H7C5E8_HUMANSerotransferrin(Fragment)OS=HomosapiensGN=TFPE=1SV=1;tr|C9JVG0|C9JVG0_HUMANSerotransferrin(Fragment)OS=HomosapiensGN=TFPE=1SV=1;tr|F8WCI6|F8WCI6_HUMANSerotransferrinOS=HomosapiensGN=TFPE=1SV=1;tr|F8WEK9|F8WEK9_HUMANSerotransferrinOS=HomosapiensGN=TFPE=1SV=1;tr|C9JB55|C9JB55_HUMANSerotransferrin(Fragment)OS=Homosa…	34489000000	79220000	20464000	27839000	27072000	39451000000	25441000000	1	9219200000	7907200000	6928719000	1.64037e+10	0.422388	0.365978
tr|A0A0J9YY99|A0A0J9YY99_HUMANUncharacterizedprotein(Fragment)OS=HomosapiensPE=1SV=1;sp|P0DP03|HV335_HUMANImmunoglobulinheavyvariable3-30-5OS=HomosapiensGN=IGHV3-30-5PE=3SV=1;sp|P01768|HV330_HUMANImmunoglobulinheavyvariable3-30OS=HomosapiensGN=IGHV3-30PE=1SV=2;sp|P01764|HV323_HUMANImmunoglobulinheavyvariable3-23OS=HomosapiensGN=IGHV3-23PE=1SV=2	538100000	55038000	26748000	1	1	314740000	148410000	1	736850000	198190000	1.23977e+08	2.79638e+08	0.443349	0.366435
sp|Q9NV96|CC50A_HUMANCellcyclecontrolprotein50AOS=HomosapiensGN=TMEM30APE=1SV=1;sp|Q3MIR4|CC50B_HUMANCellcyclecontrolprotein50BOS=HomosapiensGN=TMEM30BPE=1SV=1	1	1	1	20338000	1	1	7731200	1	30859000	15496000	4.0676e+06	1.08172e+07	0.376029	0.367307
sp|Q9HD89|RETN_HUMANResistinOS=HomosapiensGN=RETNPE=1SV=1	41096000	1	1	1	1	1	12494000	1	38354000	55126000	8.2192e+06	2.11948e+07	0.387793	0.372341
sp|P07360|CO8G_HUMANComplementcomponentC8gammachainOS=HomosapiensGN=C8GPE=1SV=3	19812000	1	1	1	1	1	1	1	14333000	84984000	3.9624e+06	1.98634e+07	0.199482	0.376543
sp|O43707|ACTN4_HUMANAlpha-actinin-4OS=HomosapiensGN=ACTN4PE=1SV=2;tr|H7C144|H7C144_HUMANAlpha-actinin-4(Fragment)OS=HomosapiensGN=ACTN4PE=1SV=1;tr|F5GXS2|F5GXS2_HUMANAlpha-actinin-4OS=HomosapiensGN=ACTN4PE=1SV=2;tr|H9KV75|H9KV75_HUMANAlpha-actinin-1OS=HomosapiensGN=ACTN1PE=1SV=1;sp|P12814|ACTN1_HUMANAlpha-actinin-1OS=HomosapiensGN=ACTN1PE=1SV=2;tr|K7EJH8|K7EJH8_HUMANAlpha-actinin-4(Fragment)OS=H…	3558500	1	1	1	1	4329900	6332500	1	1	1	711701	2.13248e+06	0.333743	0.377447
sp|P01871|IGHM_HUMANImmunoglobulinheavyconstantmuOS=HomosapiensGN=IGHMPE=1SV=4;tr|A0A1B0GUU9|A0A1B0GUU9_HUMANImmunoglobulinheavyconstantmu(Fragment)OS=HomosapiensGN=IGHMPE=1SV=1	12181000000	455740000	191020000	220160000	3174900000	2503100000	2741600000	1	46078000000	6409300000	3244564000	1.15464e+10	0.281002	0.382941
tr|C9JC71|C9JC71_HUMANLowaffinityimmunoglobulingammaFcregionreceptorIII-A(Fragment)OS=HomosapiensGN=FCGR3APE=1SV=1;sp|P08637|FCG3A_HUMANLowaffinityimmunoglobulingammaFcregionreceptorIII-AOS=HomosapiensGN=FCGR3APE=1SV=2;tr|A0A1W2PQB1|A0A1W2PQB1_HUMANFcofIgGlowaffinityIIIareceptorisoform1OS=HomosapiensGN=FCGR3APE=1SV=1;tr|H0Y755|H0Y755_HUMANLowaffinityimmunoglobulingammaFcregionreceptorIII-A(Fragme…	70054000	1	1	1	1	72733000	59268000	1	1	32380000	1.40108e+07	3.28762e+07	0.426168	0.383484
sp|P17931|LEG3_HUMANGalectin-3OS=HomosapiensGN=LGALS3PE=1SV=5;tr|G3V3R6|G3V3R6_HUMANGalectinOS=HomosapiensGN=LGALS3PE=1SV=1	146080000	76227000	139400000	35217000	1	99385000	114720000	1	224780000	177700000	7.93848e+07	1.23317e+08	0.643746	0.383544
sp|Q02763|TIE2_HUMANAngiopoietin-1receptorOS=HomosapiensGN=TEKPE=1SV=2	2871300000	1	1	1	1	57664000	57949000	1	11272000	106840000	5.7426e+08	4.6745e+07	12.285	0.385414
sp|P50995|ANX11_HUMANAnnexinA11OS=HomosapiensGN=ANXA11PE=1SV=1	1	72884000	1	1	30363000	1	1	1	15710000	19151000	2.06494e+07	6.9722e+06	2.96168	0.387132
sp|P02747|C1QC_HUMANComplementC1qsubcomponentsubunitCOS=HomosapiensGN=C1QCPE=1SV=3	353780000	53469000	1	1	1	216380000	98472000	1	145070000	359150000	8.14498e+07	1.63814e+08	0.497208	0.394027
sp|P02675|FIBB_HUMANFibrinogenbetachainOS=HomosapiensGN=FGBPE=1SV=2;tr|D6REL8|D6REL8_HUMANFibrinogenbetachainOS=HomosapiensGN=FGBPE=1SV=1;CON__P02676	424440000	1	1	1	1749700000	91617000	184050000	1	159280000	209650000	4.34828e+08	1.28919e+08	3.37287	0.395775
sp|P00450|CERU_HUMANCeruloplasminOS=HomosapiensGN=CPPE=1SV=1;tr|E9PFZ2|E9PFZ2_HUMANCeruloplasminOS=HomosapiensGN=CPPE=1SV=1;tr|H7C5R1|H7C5R1_HUMANCeruloplasmin(Fragment)OS=HomosapiensGN=CPPE=1SV=1;CON__ENSEMBL:ENSBTAP00000031900;tr|D6RE86|D6RE86_HUMANCeruloplasmin(Fragment)OS=HomosapiensGN=CPPE=1SV=8;tr|H7C5N5|H7C5N5_HUMANCeruloplasmin(Fragment)OS=HomosapiensGN=CPPE=1SV=1	1015200000	805390000	115640000	121850000	1601400000	1769400000	1908200000	1	2053800000	269320000	731896000	1.20014e+09	0.60984	0.396097
tr|A0A0G2JNJ5|A0A0G2JNJ5_HUMANMucin-4(Fragment)OS=HomosapiensGN=MUC4PE=1SV=1;tr|A0A0G2JPA4|A0A0G2JPA4_HUMANMucin-4OS=HomosapiensGN=MUC4PE=1SV=1;sp|Q99102|MUC4_HUMANMucin-4OS=HomosapiensGN=MUC4PE=1SV=4;tr|A0A0G2JMX1|A0A0G2JMX1_HUMANMucin-4(Fragment)OS=HomosapiensGN=MUC4PE=1SV=1;tr|E7ENC5|E7ENC5_HUMANMucin-4OS=HomosapiensGN=MUC4PE=1SV=1;tr|A0A0G2JNM3|A0A0G2JNM3_HUMANMucin-4(Fragment)OS=HomosapiensG…	153180000	74053000	143580000	122180000	1	78602000	73802000	1	252990000	538280000	9.85986e+07	1.88735e+08	0.522419	0.397248
sp|A0A0C4DH31|HV118_HUMANImmunoglobulinheavyvariable1-18OS=HomosapiensGN=IGHV1-18PE=3SV=1	112260000	1	1	1	1	75888000	65223000	1	32766000	55188000	2.2452e+07	4.5813e+07	0.490079	0.398465
sp|Q9BW30|TPPP3_HUMANTubulinpolymerization-promotingproteinfamilymember3OS=HomosapiensGN=TPPP3PE=1SV=1	24678000	1	32692000	80914000	16078000	40903000	21916000	1	13070000	11680000	3.08724e+07	1.75138e+07	1.76275	0.406264
sp|P16403|H12_HUMANHistoneH1.2OS=HomosapiensGN=HIST1H1CPE=1SV=2	20879000	1	1	1	1	23381000	33571000	1	1	1	4.1758e+06	1.13904e+07	0.366607	0.409378
sp|O43866|CD5L_HUMANCD5antigen-likeOS=HomosapiensGN=CD5LPE=1SV=1	2127300000	556790000	461380000	59077000	126380000	366650000	171700000	1	755880000	310290000	666185400	3.20904e+08	2.07596	0.410722
tr|G3V1N2|G3V1N2_HUMANHCG1745306,isoformCRA_aOS=HomosapiensGN=HBA2PE=1SV=1	1	66624000	40122000	49188000	1	1	1	1	968680000	23067000	3.11868e+07	1.98349e+08	0.157232	0.411877
sp|P07737|PROF1_HUMANProfilin-1OS=HomosapiensGN=PFN1PE=1SV=2;tr|K7EJ44|K7EJ44_HUMANProfilinOS=HomosapiensGN=PFN1PE=1SV=1;tr|I3L3D5|I3L3D5_HUMANProfilin(Fragment)OS=HomosapiensGN=PFN1PE=1SV=1	41010000	147840000	28596000	48686000	1	82413000	86356000	1	116180000	123460000	5.32264e+07	8.16818e+07	0.651631	0.417806
sp|P61224|RAP1B_HUMANRas-relatedproteinRap-1bOS=HomosapiensGN=RAP1BPE=1SV=1;tr|E7ESV4|E7ESV4_HUMANRas-relatedproteinRap-1b(Fragment)OS=HomosapiensGN=RAP1BPE=1SV=1;tr|A0A0J9YXB3|A0A0J9YXB3_HUMANRas-relatedproteinRap-1b-likeproteinOS=HomosapiensPE=4SV=1;tr|F5H7Y6|F5H7Y6_HUMANRas-relatedproteinRap-1bOS=HomosapiensGN=RAP1BPE=1SV=1;sp|P62834|RAP1A_HUMANRas-relatedproteinRap-1AOS=HomosapiensGN=RAP1APE=…	1	1	1	1	105190000	1	1	1	14733000	1	2.1038e+07	2.9466e+06	7.13975	0.419183
sp|O43490|PROM1_HUMANProminin-1OS=HomosapiensGN=PROM1PE=1SV=1	179100000	74403000	167170000	632550000	33411000	169500000	150570000	1	1367100000	543750000	217326800	4.46184e+08	0.487079	0.420253
tr|A0A096LPE2|A0A096LPE2_HUMANSAA2-SAA4readthroughOS=HomosapiensGN=SAA2-SAA4PE=4SV=1;sp|P35542|SAA4_HUMANSerumamyloidA-4proteinOS=HomosapiensGN=SAA4PE=1SV=2	355080000	1	1	1	1	1	1	1	29119000	26033000	7.1016e+07	1.10304e+07	6.43821	0.424843
sp|Q96CX2|KCD12_HUMANBTB/POZdomain-containingproteinKCTD12OS=HomosapiensGN=KCTD12PE=1SV=1	1	1	1	51996000	1	1	1	1	1	7976300	1.03992e+07	1.59526e+06	6.51881	0.426988
sp|P31146|COR1A_HUMANCoronin-1AOS=HomosapiensGN=CORO1APE=1SV=4;tr|H3BRY3|H3BRY3_HUMANCoroninOS=HomosapiensGN=CORO1APE=1SV=1	132910000	1	1	35832000	1	10610000	1	1	12244000	35330000	3.37484e+07	1.16368e+07	2.90014	0.428942
sp|P01704|LV214_HUMANImmunoglobulinlambdavariable2-14OS=HomosapiensGN=IGLV2-14PE=1SV=2	150200000	1	1	1	1	87080000	88896000	1	1	143600000	3.004e+07	6.39152e+07	0.469998	0.433338
tr|G5E9F8|G5E9F8_HUMANProteinS(Alpha),isoformCRA_bOS=HomosapiensGN=PROS1PE=1SV=1;sp|P07225|PROS_HUMANVitaminK-dependentproteinSOS=HomosapiensGN=PROS1PE=1SV=1;tr|C9K0R0|C9K0R0_HUMANVitaminK-dependentproteinS(Fragment)OS=HomosapiensGN=PROS1PE=1SV=1;tr|H7BXT0|H7BXT0_HUMANVitaminK-dependentproteinS(Fragment)OS=HomosapiensGN=PROS1PE=1SV=1	110710000	1	1	1	1	1401400	3300200	1	5539800	10248000	2.2142e+07	4.09788e+06	5.40328	0.440143
sp|P30041|PRDX6_HUMANPeroxiredoxin-6OS=HomosapiensGN=PRDX6PE=1SV=3	10790000	114730000	45073000	1	186890000	69165000	90795000	1	30385000	9037600	7.14966e+07	3.98765e+07	1.79295	0.443401
sp|Q14624|ITIH4_HUMANInter-alpha-trypsininhibitorheavychainH4OS=HomosapiensGN=ITIH4PE=1SV=4;tr|B7ZKJ8|B7ZKJ8_HUMANITIH4proteinOS=HomosapiensGN=ITIH4PE=1SV=1;CON__Q3T052	1245700000	1	1	1	1	1	7367800	1	22323000	224090000	2.4914e+08	5.07562e+07	4.90857	0.455405
sp|P23142|FBLN1_HUMANFibulin-1OS=HomosapiensGN=FBLN1PE=1SV=4;CON__ENSEMBL:ENSBTAP00000016046;tr|B1AHL2|B1AHL2_HUMANFibulin-1OS=HomosapiensGN=FBLN1PE=1SV=1	70429000	1	1	1	1	7045400	7880700	1	1	1	1.40858e+07	2.98522e+06	4.71851	0.457021
sp|P02656|APOC3_HUMANApolipoproteinC-IIIOS=HomosapiensGN=APOC3PE=1SV=1;tr|B0YIW2|B0YIW2_HUMANApolipoproteinC-IIIOS=HomosapiensGN=APOC3PE=1SV=1	935310000	1	14948000	1	17420000	34425000	69347000	1	99975000	36274000	1.93536e+08	4.80042e+07	4.03164	0.457096
sp|P06702|S10A9_HUMANProteinS100-A9OS=HomosapiensGN=S100A9PE=1SV=1	12139000	1085700000	560200000	555100000	1729500000	74287000	16313000	1	1621800000	573900000	788527800	4.5726e+08	1.72446	0.457583
sp|Q16651|PRSS8_HUMANProstasinOS=HomosapiensGN=PRSS8PE=1SV=1;tr|H3BVC8|H3BVC8_HUMANProstasin(Fragment)OS=HomosapiensGN=PRSS8PE=1SV=8	7341000	90794000	1	1	1	78442000	91759000	1	15914000	12566000	1.9627e+07	3.97362e+07	0.493932	0.460554
sp|Q96Q06|PLIN4_HUMANPerilipin-4OS=HomosapiensGN=PLIN4PE=1SV=2;tr|A0A0J9YXN7|A0A0J9YXN7_HUMANPerilipin-4OS=HomosapiensGN=PLIN4PE=1SV=1	1	1	1	25280000	1	1	1	1	5387500	1	5.056e+06	1.0775e+06	4.69234	0.46365
sp|O43897|TLL1_HUMANTolloid-likeprotein1OS=HomosapiensGN=TLL1PE=1SV=1;tr|E9PD25|E9PD25_HUMANMetalloendopeptidaseOS=HomosapiensGN=TLL1PE=3SV=1	257300000	1	1	1	1	1	1	1	30375000	28036000	5.146e+07	1.16822e+07	4.40499	0.465898
sp|P31949|S10AB_HUMANProteinS100-A11OS=HomosapiensGN=S100A11PE=1SV=2	1	1	1	56769000	1	45568000	38639000	1	29059000	1	1.13538e+07	2.26532e+07	0.501201	0.469312
tr|F5GYU8|F5GYU8_HUMANTransmembranechannel-likeproteinOS=HomosapiensGN=TMC5PE=1SV=1;sp|Q6UXY8|TMC5_HUMANTransmembranechannel-likeprotein5OS=HomosapiensGN=TMC5PE=2SV=3;tr|H3BN68|H3BN68_HUMANTransmembranechannel-likeproteinOS=HomosapiensGN=TMC5PE=1SV=1	57740000	43679000	17090000	121480000	1	40645000	25819000	1	49748000	39233000	4.79978e+07	3.1089e+07	1.54388	0.476961
sp|Q13938|CAYP1_HUMANCalcyphosinOS=HomosapiensGN=CAPSPE=1SV=1;tr|K7EL21|K7EL21_HUMANCalcyphosinOS=HomosapiensGN=CAPSPE=1SV=1;tr|K7ES72|K7ES72_HUMANCalcyphosin(Fragment)OS=HomosapiensGN=CAPSPE=1SV=2;tr|A0A0X1KG78|A0A0X1KG78_HUMANCalcyphosinOS=HomosapiensGN=CAPSPE=1SV=1	255650000	397760000	131120000	22518000	121560000	511980000	1176500000	1	38058000	58206000	185721600	3.56949e+08	0.520303	0.485692
tr|A0A087WYX0|A0A087WYX0_HUMANCarcinoembryonicantigen-relatedcelladhesionmolecule5OS=HomosapiensGN=CEACAM5PE=1SV=1;tr|A0A024R0K5|A0A024R0K5_HUMANCarcinoembryonicantigen-relatedcelladhesionmolecule5OS=HomosapiensGN=CEACAM5PE=1SV=1;sp|P06731|CEAM5_HUMANCarcinoembryonicantigen-relatedcelladhesionmolecule5OS=HomosapiensGN=CEACAM5PE=1SV=3;tr|T2HUW8|T2HUW8_HUMANCarcinoembryonicantigen-relatedcelladhesi…	56440000	1	1	1	1	39437000	46571000	1	23695000	1	1.1288e+07	2.19406e+07	0.51448	0.494356
sp|P69905|HBA_HUMANHemoglobinsubunitalphaOS=HomosapiensGN=HBA1PE=1SV=2	24351000000	792630000	215860000	739950000	5307000000	2374700000	2612600000	1	9009000000	284460000	6281288000	2.85615e+09	2.19921	0.50341
sp|P00734|THRB_HUMANProthrombinOS=HomosapiensGN=F2PE=1SV=2;tr|E9PIT3|E9PIT3_HUMANProthrombinOS=HomosapiensGN=F2PE=1SV=1;tr|C9JV37|C9JV37_HUMANProthrombin(Fragment)OS=HomosapiensGN=F2PE=1SV=1;CON__P00735	321060000	202260000	1	31251000	1	215840000	121620000	1	115420000	445600000	1.10914e+08	1.79696e+08	0.617232	0.506075
sp|P02751|FINC_HUMANFibronectinOS=HomosapiensGN=FN1PE=1SV=4;tr|H0Y7Z1|H0Y7Z1_HUMANFibronectin(Fragment)OS=HomosapiensGN=FN1PE=1SV=1;tr|H0Y4K8|H0Y4K8_HUMANFibronectin(Fragment)OS=HomosapiensGN=FN1PE=1SV=1	6707200000	43133000	16472000	91023000	14749000	1812600000	2048900000	1	2761500000	5936300000	1374515400	2.51186e+09	0.54721	0.509761
sp|Q96NY7|CLIC6_HUMANChlorideintracellularchannelprotein6OS=HomosapiensGN=CLIC6PE=2SV=3	1	37297000	27594000	18587000	1	1	1	1	26623000	24010000	1.66956e+07	1.01266e+07	1.64869	0.516825
sp|P05546|HEP2_HUMANHeparincofactor2OS=HomosapiensGN=SERPIND1PE=1SV=3;CON__ENSEMBL:ENSBTAP00000018574	88449000	1	155640000	135330000	1	38836000	75366000	1	181480000	296280000	7.58838e+07	1.18392e+08	0.640952	0.518889
sp|P01701|LV151_HUMANImmunoglobulinlambdavariable1-51OS=HomosapiensGN=IGLV1-51PE=1SV=2	81805000	1	1	1	1	1	1	1	138580000	49307000	1.6361e+07	3.75774e+07	0.435395	0.520444
sp|P02745|C1QA_HUMANComplementC1qsubcomponentsubunitAOS=HomosapiensGN=C1QAPE=1SV=2;tr|X6RLJ0|X6RLJ0_HUMANComplementC1qsubcomponentsubunitA(Fragment)OS=HomosapiensGN=C1QAPE=1SV=7	42970000	1	1	1	1	8648200	8270100	1	12918000	57898000	8.594e+06	1.75469e+07	0.489774	0.52335
sp|P00441|SODC_HUMANSuperoxidedismutase[Cu-Zn]OS=HomosapiensGN=SOD1PE=1SV=2;tr|H7BYH4|H7BYH4_HUMANSuperoxidedismutase[Cu-Zn]OS=HomosapiensGN=SOD1PE=1SV=1	6788800	1	1	9233900	1	7859700	26603000	1	1	1	3.20454e+06	6.89254e+06	0.464929	0.523711
sp|P31997|CEAM8_HUMANCarcinoembryonicantigen-relatedcelladhesionmolecule8OS=HomosapiensGN=CEACAM8PE=1SV=2;sp|P13688|CEAM1_HUMANCarcinoembryonicantigen-relatedcelladhesionmolecule1OS=HomosapiensGN=CEACAM1PE=1SV=2	1	1	1	38243000	1	1	1	1	122540000	1	7.6486e+06	2.4508e+07	0.312086	0.529821
sp|Q06830|PRDX1_HUMANPeroxiredoxin-1OS=HomosapiensGN=PRDX1PE=1SV=1;tr|A0A0A0MSI0|A0A0A0MSI0_HUMANPeroxiredoxin-1(Fragment)OS=HomosapiensGN=PRDX1PE=1SV=1;tr|A0A0A0MRQ5|A0A0A0MRQ5_HUMANPeroxiredoxin-1OS=HomosapiensGN=PRDX1PE=1SV=1;tr|H7C3T4|H7C3T4_HUMANPeroxiredoxin-4(Fragment)OS=HomosapiensGN=PRDX4PE=1SV=1;sp|Q13162|PRDX4_HUMANPeroxiredoxin-4OS=HomosapiensGN=PRDX4PE=1SV=1;sp|P32119|PRDX2_HUMANPero…	64166000	259830000	40528000	73139000	1	123780000	152680000	1	164940000	177260000	8.75326e+07	1.23732e+08	0.707437	0.530632
sp|P09525|ANXA4_HUMANAnnexinA4OS=HomosapiensGN=ANXA4PE=1SV=4;tr|B4E1S2|B4E1S2_HUMANAnnexinOS=HomosapiensGN=ANXA4PE=1SV=1;tr|Q6P452|Q6P452_HUMANAnnexinOS=HomosapiensGN=ANXA4PE=1SV=1	1	1	1	9361900	1	1	1	1	11663000	7824000	1.87238e+06	3.8974e+06	0.480418	0.531101
tr|B4DJF2|B4DJF2_HUMAN14-3-3proteinepsilonOS=HomosapiensGN=YWHAEPE=1SV=1;tr|I3L3T1|I3L3T1_HUMAN14-3-3proteinepsilonOS=HomosapiensGN=YWHAEPE=1SV=1;sp|P62258|1433E_HUMAN14-3-3proteinepsilonOS=HomosapiensGN=YWHAEPE=1SV=1;tr|I3L0W5|I3L0W5_HUMAN14-3-3proteinepsilonOS=HomosapiensGN=YWHAEPE=1SV=1;tr|K7EIT4|K7EIT4_HUMAN14-3-3proteinepsilon(Fragment)OS=HomosapiensGN=YWHAEPE=1SV=1	1	1	1603600000	1	1	30215000	23226000	1	402380000	70108000	3.2072e+08	1.05186e+08	3.04908	0.531268
sp|P01619|KV320_HUMANImmunoglobulinkappavariable3-20OS=HomosapiensGN=IGKV3-20PE=1SV=2	1021200000	1	26357000	1	1	267290000	446100000	1	769620000	336110000	2.09511e+08	3.63824e+08	0.575859	0.535798
sp|P02649|APOE_HUMANApolipoproteinEOS=HomosapiensGN=APOEPE=1SV=1;tr|H0Y7L5|H0Y7L5_HUMANApolipoproteinE(Fragment)OS=HomosapiensGN=APOEPE=1SV=2;tr|E9PEV4|E9PEV4_HUMANApolipoproteinE(Fragment)OS=HomosapiensGN=APOEPE=1SV=1;tr|E7ERP7|E7ERP7_HUMANApolipoproteinE(Fragment)OS=HomosapiensGN=APOEPE=1SV=1;CON__Q03247	204030000	137640000	102250000	104070000	81130000	60549000	46210000	1	1048900000	117380000	125824000	2.54608e+08	0.494188	0.538864
sp|Q93077|H2A1C_HUMANHistoneH2Atype1-COS=HomosapiensGN=HIST1H2ACPE=1SV=3;sp|Q7L7L0|H2A3_HUMANHistoneH2Atype3OS=HomosapiensGN=HIST3H2APE=1SV=3;sp|P04908|H2A1B_HUMANHistoneH2Atype1-B/EOS=HomosapiensGN=HIST1H2ABPE=1SV=2	74275000	626280000	81310000	1089200000	41478000	296610000	224070000	283830000	2597400000	141450000	382508600	708672000	0.539754	0.545323
sp|P51884|LUM_HUMANLumicanOS=HomosapiensGN=LUMPE=1SV=2	112170000	1	1	1	1	3771400	1	1	29445000	6789600	2.2434e+07	8.0012e+06	2.80383	0.549519
sp|P25786|PSA1_HUMANProteasomesubunitalphatype-1OS=HomosapiensGN=PSMA1PE=1SV=1;tr|F5GX11|F5GX11_HUMANProteasomeendopeptidasecomplexOS=HomosapiensGN=PSMA1PE=1SV=1;tr|B4DEV8|B4DEV8_HUMANProteasomesubunitalphatypeOS=HomosapiensPE=2SV=1	18481000	1	1	27835000	75223000	20398000	22630000	1	20319000	13239000	2.43078e+07	1.53172e+07	1.58696	0.550561
sp|O75531|BAF_HUMANBarrier-to-autointegrationfactorOS=HomosapiensGN=BANF1PE=1SV=1	1	1	1	15415000	1	1	1	1	5777800	1	3.083e+06	1.15556e+06	2.66797	0.574408
tr|H3BQU1|H3BQU1_HUMANFanconianemiagroupAproteinOS=HomosapiensGN=FANCAPE=4SV=1	1	1	1	36022000	1	1	1	1	8302500	6701400	7.2044e+06	3.00078e+06	2.40084	0.58753
sp|P60903|S10AA_HUMANProteinS100-A10OS=HomosapiensGN=S100A10PE=1SV=2	1	1	1	1	15950000	4559200	5625300	1	10172000	5529000	3.19e+06	5.1771e+06	0.616175	0.593786
tr|A0A087X0Q4|A0A087X0Q4_HUMANImmunoglobulinkappavariable2-40OS=HomosapiensGN=IGKV2-40PE=1SV=1;sp|P01615|KVD28_HUMANImmunoglobulinkappavariable2D-28OS=HomosapiensGN=IGKV2D-28PE=1SV=2;sp|A0A075B6P5|KV228_HUMANImmunoglobulinkappavariable2-28OS=HomosapiensGN=IGKV2-28PE=3SV=1;sp|P01614|KVD40_HUMANImmunoglobulinkappavariable2D-40OS=HomosapiensGN=IGKV2D-40PE=1SV=2;sp|A0A087WW87|KV240_HUMANImmunoglobuli…	565440000	18708000	1	19116000	1	82689000	101750000	1	542050000	281620000	1.20653e+08	2.01622e+08	0.598411	0.597858
sp|P01703|LV140_HUMANImmunoglobulinlambdavariable1-40OS=HomosapiensGN=IGLV1-40PE=1SV=2	172160000	1	1	105130000	1	95049000	166360000	1	98992000	39919000	5.5458e+07	8.0064e+07	0.692671	0.603207
tr|U3KPS2|U3KPS2_HUMANMyeloblastinOS=HomosapiensGN=PRTN3PE=1SV=1;sp|P24158|PRTN3_HUMANMyeloblastinOS=HomosapiensGN=PRTN3PE=1SV=3	1	1	1	124520000	1	1	1	1	260290000	17401000	2.4904e+07	5.55382e+07	0.448412	0.605736
sp|Q99828|CIB1_HUMANCalciumandintegrin-bindingprotein1OS=HomosapiensGN=CIB1PE=1SV=4	8238000	34062000	15650000	1	1	11838000	14129000	1	18704000	36094000	1.159e+07	1.6153e+07	0.717514	0.611293
sp|P27105|STOM_HUMANErythrocyteband7integralmembraneproteinOS=HomosapiensGN=STOMPE=1SV=3;tr|F8VSL7|F8VSL7_HUMANErythrocyteband7integralmembraneproteinOS=HomosapiensGN=STOMPE=1SV=1	12369000	83113000	304900000	210800000	1	91176000	73099000	1	120610000	157430000	1.22236e+08	8.8463e+07	1.38178	0.615583
tr|K7EQ23|K7EQ23_HUMANNiemann-PickC1protein(Fragment)OS=HomosapiensGN=NPC1PE=1SV=1;sp|O15118|NPC1_HUMANNiemann-PickC1proteinOS=HomosapiensGN=NPC1PE=1SV=2	1	10310000	1	1	1	1	1	1	1	4459400	2.062e+06	891881	2.31197	0.616586
sp|P62328|TYB4_HUMANThymosinbeta-4OS=HomosapiensGN=TMSB4XPE=1SV=2	48440000	1	1	52458000	136310000	119610000	154000000	1	44915000	17458000	4.74416e+07	6.71966e+07	0.706012	0.624866
sp|P13473|LAMP2_HUMANLysosome-associatedmembraneglycoprotein2OS=HomosapiensGN=LAMP2PE=1SV=2;tr|H0YCG2|H0YCG2_HUMANLysosome-associatedmembraneglycoprotein2(Fragment)OS=HomosapiensGN=LAMP2PE=1SV=1	13322000	1	1	16465000	1	1	1	1	46845000	7902400	5.9574e+06	1.09495e+07	0.544081	0.624913
sp|Q9C0J9|BHE41_HUMANClassEbasichelix-loop-helixprotein41OS=HomosapiensGN=BHLHE41PE=1SV=1	1	1	1	55263000	1	1	1	1	24536000	1	1.10526e+07	4.9072e+06	2.25232	0.625041
sp|P01876|IGHA1_HUMANImmunoglobulinheavyconstantalpha1OS=HomosapiensGN=IGHA1PE=1SV=2	95883000000	24543000000	7358900000	15887000000	7488200000	56195000000	54761000000	1	40357000000	49875000000	30232020000	4.02376e+10	0.751338	0.625326
sp|Q8TDL5|BPIB1_HUMANBPIfold-containingfamilyBmember1OS=HomosapiensGN=BPIFB1PE=1SV=1;tr|A2A2R0|A2A2R0_HUMANBPIfold-containingfamilyBmember1(Fragment)OS=HomosapiensGN=BPIFB1PE=1SV=1	3498700000	4846700000	3491700000	7001000000	1590900000	1146400000	1128800000	1	8452300000	5109400000	4085800000	3.16738e+09	1.28996	0.626721
sp|P00748|FA12_HUMANCoagulationfactorXIIOS=HomosapiensGN=F12PE=1SV=3	105310000	1	1	1	1	22953000	15824000	1	1	12306000	2.1062e+07	1.02166e+07	2.06155	0.628172
sp|Q9P121|NTRI_HUMANNeurotriminOS=HomosapiensGN=NTMPE=1SV=1;tr|F6WFR7|F6WFR7_HUMANNeurotriminOS=HomosapiensGN=NTMPE=1SV=1;tr|F8W8Y1|F8W8Y1_HUMANNeurotriminOS=HomosapiensGN=NTMPE=1SV=1;tr|H7BZ62|H7BZ62_HUMANNeurotrimin(Fragment)OS=HomosapiensGN=NTMPE=1SV=1;tr|F8VTR5|F8VTR5_HUMANNeurotrimin(Fragment)OS=HomosapiensGN=NTMPE=1SV=1	7496900	1	121500000	27583000	1	1	1	1	29237000	62166000	3.1316e+07	1.82806e+07	1.71307	0.632143
sp|P02671|FIBA_HUMANFibrinogenalphachainOS=HomosapiensGN=FGAPE=1SV=2;tr|A0A087WUA0|A0A087WUA0_HUMANFibrinogenalphachainOS=HomosapiensGN=FGAPE=1SV=1	2019000000	104560000	91973000	72883000	382420000	406180000	467310000	1	236080000	595000000	534167200	3.40914e+08	1.56687	0.63304
tr|G3V0E5|G3V0E5_HUMANTransferrinreceptor(P90,CD71),isoformCRA_cOS=HomosapiensGN=TFRCPE=1SV=1;sp|P02786|TFR1_HUMANTransferrinreceptorprotein1OS=HomosapiensGN=TFRCPE=1SV=2	34296000	1	1	1	1	23242000	22674000	1	1	8525700	6.8592e+06	1.08883e+07	0.629958	0.651488
sp|P01717|LV325_HUMANImmunoglobulinlambdavariable3-25OS=HomosapiensGN=IGLV3-25PE=1SV=2	90641000	1	1	1	1	33546000	52331000	1	4799800	48823000	1.81282e+07	2.79e+07	0.649757	0.656454
sp|P08493|MGP_HUMANMatrixGlaproteinOS=HomosapiensGN=MGPPE=1SV=2	8902700	1	1	1	1	6482600	8305500	1	1	1	1.78054e+06	2.95762e+06	0.602018	0.657419
sp|Q04917|1433F_HUMAN14-3-3proteinetaOS=HomosapiensGN=YWHAHPE=1SV=4;tr|F8WEB6|F8WEB6_HUMAN14-3-3proteinetaOS=HomosapiensGN=YWHAHPE=1SV=1;tr|A2IDB1|A2IDB1_HUMAN14-3-3proteinetaOS=HomosapiensGN=YWHAHPE=1SV=1	29655000	1	1	1	1	17612000	31997000	1	1	1	5.931e+06	9.9218e+06	0.597775	0.661885
sp|P04433|KV311_HUMANImmunoglobulinkappavariable3-11OS=HomosapiensGN=IGKV3-11PE=1SV=1;sp|A0A0A0MRZ8|KVD11_HUMANImmunoglobulinkappavariable3D-11OS=HomosapiensGN=IGKV3D-11PE=3SV=6	367550000	306030000	1	1	1	156060000	1	1	535100000	271350000	1.34716e+08	1.92502e+08	0.699816	0.668016
tr|A0A0J9YXZ5|A0A0J9YXZ5_HUMANRasGTPase-activating-likeproteinIQGAP1OS=HomosapiensGN=IQGAP1PE=1SV=1;sp|P46940|IQGA1_HUMANRasGTPase-activating-likeproteinIQGAP1OS=HomosapiensGN=IQGAP1PE=1SV=1;tr|H0YLE8|H0YLE8_HUMANRasGTPase-activating-likeproteinIQGAP1OS=HomosapiensGN=IQGAP1PE=1SV=1	9160500	1	1	1	1	1	4635300	1	1	1	1.8321e+06	927061	1.97625	0.671045
sp|P02042|HBD_HUMANHemoglobinsubunitdeltaOS=HomosapiensGN=HBDPE=1SV=2;tr|E9PFT6|E9PFT6_HUMANHemoglobinsubunitdeltaOS=HomosapiensGN=HBDPE=1SV=1;tr|E9PEW8|E9PEW8_HUMANHemoglobinsubunitdelta(Fragment)OS=HomosapiensGN=HBDPE=1SV=1;CON__Q3SX09;tr|C9JRG0|C9JRG0_HUMANHemoglobinsubunitdelta(Fragment)OS=HomosapiensGN=HBDPE=1SV=1;tr|A8MUF7|A8MUF7_HUMANHemoglobinsubunitepsilon(Fragment)OS=HomosapiensGN=HBE1P…	137560000	1	1	1	1	33824000	62306000	1	111610000	4953500	2.7512e+07	4.25387e+07	0.646752	0.673345
sp|P25311|ZA2G_HUMANZinc-alpha-2-glycoproteinOS=HomosapiensGN=AZGP1PE=1SV=2;tr|C9JEV0|C9JEV0_HUMANZinc-alpha-2-glycoproteinOS=HomosapiensGN=AZGP1PE=1SV=1;tr|H7BZJ8|H7BZJ8_HUMANZinc-alpha-2-glycoprotein(Fragment)OS=HomosapiensGN=AZGP1PE=1SV=1	163710000	1	1	1	1	138830000	123720000	1	1	1	3.2742e+07	5.251e+07	0.623538	0.678423
sp|P25788|PSA3_HUMANProteasomesubunitalphatype-3OS=HomosapiensGN=PSMA3PE=1SV=2;tr|G3V4X5|G3V4X5_HUMANProteasomeendopeptidasecomplexOS=HomosapiensGN=PSMA3PE=1SV=1;tr|G3V3W4|G3V3W4_HUMANProteasomesubunitalphatype-3OS=HomosapiensGN=PSMA3PE=1SV=1;tr|G3V5N4|G3V5N4_HUMANProteasomesubunitalphatype-3OS=HomosapiensGN=PSMA3PE=1SV=1	9582000	1	11116000	31308000	1	9917900	12533000	1	36909000	10508000	1.04012e+07	1.39736e+07	0.744348	0.68134
sp|P01019|ANGT_HUMANAngiotensinogenOS=HomosapiensGN=AGTPE=1SV=1	158810000	1	1	1	1	79513000	78329000	1	18075000	58298000	3.1762e+07	4.6843e+07	0.678052	0.68324
sp|P21980|TGM2_HUMANProtein-glutaminegamma-glutamyltransferase2OS=HomosapiensGN=TGM2PE=1SV=2;tr|A2A299|A2A299_HUMANProtein-glutaminegamma-glutamyltransferase2(Fragment)OS=HomosapiensGN=TGM2PE=1SV=8;tr|A2A2A0|A2A2A0_HUMANProtein-glutaminegamma-glutamyltransferase2(Fragment)OS=HomosapiensGN=TGM2PE=1SV=8	1	167090000	184070000	190580000	7144800	132000000	87035000	1	214700000	245770000	1.09777e+08	1.35901e+08	0.807772	0.684953
tr|B4E1Z4|B4E1Z4_HUMANcDNAFLJ55673,highlysimilartoComplementfactorB(EC3.4.21.47)OS=HomosapiensPE=1SV=1;tr|E7ETN3|E7ETN3_HUMANUncharacterizedproteinOS=HomosapiensPE=1SV=1;sp|P00751|CFAB_HUMANComplementfactorBOS=HomosapiensGN=CFBPE=1SV=2;tr|A0A0G2JH38|A0A0G2JH38_HUMANComplementfactorB(Fragment)OS=HomosapiensGN=CFBPE=3SV=1;tr|H7C5H1|H7C5H1_HUMANComplementfactorB(Fragment)OS=HomosapiensGN=CFBPE=1SV=1…	1628600000	175230000	1	1	1	608560000	950850000	1	144860000	866740000	3.60766e+08	5.14202e+08	0.701604	0.690268
sp|P04406|G3P_HUMANGlyceraldehyde-3-phosphatedehydrogenaseOS=HomosapiensGN=GAPDHPE=1SV=3;tr|E7EUT5|E7EUT5_HUMANGlyceraldehyde-3-phosphatedehydrogenaseOS=HomosapiensGN=GAPDHPE=1SV=1;tr|H0Y4M7|H0Y4M7_HUMAN85/88kDacalcium-independentphospholipaseA2(Fragment)OS=HomosapiensGN=PLA2G6PE=1SV=1;tr|E7EX67|E7EX67_HUMAN85/88kDacalcium-independentphospholipaseA2OS=HomosapiensGN=PLA2G6PE=1SV=1;tr|H0Y6T3|H0Y6T3…	322070000	36921000	13531000	54269000	1311400000	152860000	197350000	1	1331800000	745550000	347638200	4.85512e+08	0.716024	0.703182
sp|P00738|HPT_HUMANHaptoglobinOS=HomosapiensGN=HPPE=1SV=1;tr|J3QLC9|J3QLC9_HUMANHaptoglobin(Fragment)OS=HomosapiensGN=HPPE=1SV=1;tr|J3QR68|J3QR68_HUMANHaptoglobin(Fragment)OS=HomosapiensGN=HPPE=1SV=1;tr|H0Y300|H0Y300_HUMANHaptoglobinOS=HomosapiensGN=HPPE=1SV=4;tr|A0A0C4DGL8|A0A0C4DGL8_HUMANHaptoglobinOS=HomosapiensGN=HPPE=1SV=1;tr|A0A087WU08|A0A087WU08_HUMANHaptoglobinOS=HomosapiensGN=HPPE=1SV=1;…	28703000000	633870000	628840000	690770000	641890000	7827300000	9341100000	1	26219000000	1354000000	6259674000	8.94828e+09	0.699539	0.722359
sp|Q10588|BST1_HUMANADP-ribosylcyclase/cyclicADP-ribosehydrolase2OS=HomosapiensGN=BST1PE=1SV=2;tr|A6NC48|A6NC48_HUMANADP-ribosylcyclase/cyclicADP-ribosehydrolase2OS=HomosapiensGN=BST1PE=1SV=1;tr|H0Y984|H0Y984_HUMANADP-ribosylcyclase/cyclicADP-ribosehydrolase2(Fragment)OS=HomosapiensGN=BST1PE=1SV=1	1	1	1	150730000	1	24608000	23576000	1	40466000	5882200	3.0146e+07	1.89064e+07	1.59448	0.726333
sp|P11215|ITAM_HUMANIntegrinalpha-MOS=HomosapiensGN=ITGAMPE=1SV=2;sp|Q13349|ITAD_HUMANIntegrinalpha-DOS=HomosapiensGN=ITGADPE=1SV=2;sp|P20702|ITAX_HUMANIntegrinalpha-XOS=HomosapiensGN=ITGAXPE=1SV=3;tr|H3BN02|H3BN02_HUMANIntegrinalpha-XOS=HomosapiensGN=ITGAXPE=1SV=1	1	164030000	42528000	113180000	30115000	17269000	11542000	1	462700000	29804000	6.99706e+07	1.04263e+08	0.671097	0.726388
tr|B1AKG0|B1AKG0_HUMANComplementfactorH-relatedprotein1OS=HomosapiensGN=CFHR1PE=1SV=1;sp|Q03591|FHR1_HUMANComplementfactorH-relatedprotein1OS=HomosapiensGN=CFHR1PE=1SV=2;tr|V9GYE7|V9GYE7_HUMANComplementfactorH-relatedprotein2OS=HomosapiensGN=CFHR2PE=1SV=1;sp|P36980|FHR2_HUMANComplementfactorH-relatedprotein2OS=HomosapiensGN=CFHR2PE=1SV=1	1	19139000	1	1	1	6092500	5693200	1	1	1	3.8278e+06	2.35714e+06	1.62392	0.728561
sp|P04040|CATA_HUMANCatalaseOS=HomosapiensGN=CATPE=1SV=3	116840000	61443000	24124000	77729000	106500000	8585000	10408000	1	554360000	11067000	77327200	1.16884e+08	0.661572	0.729936
sp|P08238|HS90B_HUMANHeatshockproteinHSP90-betaOS=HomosapiensGN=HSP90AB1PE=1SV=4;sp|Q58FF8|H90B2_HUMANPutativeheatshockproteinHSP90-beta2OS=HomosapiensGN=HSP90AB2PPE=1SV=2;sp|Q58FF7|H90B3_HUMANPutativeheatshockproteinHSP90-beta-3OS=HomosapiensGN=HSP90AB3PPE=5SV=1;tr|F8W026|F8W026_HUMANEndoplasmin(Fragment)OS=HomosapiensGN=HSP90B1PE=1SV=8	36139000	44149000	1	1	61199000	21876000	33156000	1	35587000	83630000	2.82974e+07	3.48498e+07	0.811982	0.730803
sp|P07358|CO8B_HUMANComplementcomponentC8betachainOS=HomosapiensGN=C8BPE=1SV=3;tr|F5GY80|F5GY80_HUMANComplementcomponentC8betachainOS=HomosapiensGN=C8BPE=1SV=1;tr|F5H7G1|F5H7G1_HUMANComplementcomponentC8betachainOS=HomosapiensGN=C8BPE=1SV=1	98355000	1	1	1	1	26246000	17108000	1	20132000	76810000	1.9671e+07	2.80592e+07	0.701054	0.730876
sp|P01889|1B07_HUMANHLAclassIhistocompatibilityantigen,B-7alphachainOS=HomosapiensGN=HLA-BPE=1SV=3;tr|A0A1W2PPR8|A0A1W2PPR8_HUMANHLAclassIhistocompatibilityantigen,B-46alphachainOS=HomosapiensGN=HLA-BPE=1SV=1;tr|F6U0H7|F6U0H7_HUMANHLAclassIhistocompatibilityantigen,B-46alphachain(Fragment)OS=HomosapiensGN=HLA-BPE=1SV=1;sp|Q31610|1B81_HUMANHLAclassIhistocompatibilityantigen,B-81alphachainOS=Homosa…	1	1	18977000	1	1	1	1	1	1	11139000	3.7954e+06	2.2278e+06	1.70365	0.730904
tr|I3L1H9|I3L1H9_HUMANZymogengranuleprotein16homologB(Fragment)OS=HomosapiensGN=ZG16BPE=1SV=1;tr|I3L3X0|I3L3X0_HUMANZymogengranuleprotein16homologB(Fragment)OS=HomosapiensGN=ZG16BPE=1SV=1;tr|A0A0C4DGN4|A0A0C4DGN4_HUMANZymogengranuleprotein16homologBOS=HomosapiensGN=ZG16BPE=1SV=1;sp|Q96DA0|ZG16B_HUMANZymogengranuleprotein16homologBOS=HomosapiensGN=ZG16BPE=1SV=3	1	1	1	23212000	1	1	1	1	11619000	23221000	4.6424e+06	6.968e+06	0.666246	0.732388
sp|P04003|C4BPA_HUMANC4b-bindingproteinalphachainOS=HomosapiensGN=C4BPAPE=1SV=2;tr|F2Z2V7|F2Z2V7_HUMANC4b-bindingproteinalphachainOS=HomosapiensGN=C4BPAPE=1SV=1;tr|A6PVY5|A6PVY5_HUMANC4b-bindingproteinalphachain(Fragment)OS=HomosapiensGN=C4BPAPE=1SV=1	907400000	1	1	10195000	18844000	34853000	55166000	1	265400000	1036500000	1.87288e+08	2.78384e+08	0.672768	0.740373
sp|P00338|LDHA_HUMANL-lactatedehydrogenaseAchainOS=HomosapiensGN=LDHAPE=1SV=2;tr|F5GXH2|F5GXH2_HUMANL-lactatedehydrogenaseAchain(Fragment)OS=HomosapiensGN=LDHAPE=1SV=1;tr|F5GYU2|F5GYU2_HUMANL-lactatedehydrogenaseAchain(Fragment)OS=HomosapiensGN=LDHAPE=1SV=1;tr|F5GXY2|F5GXY2_HUMANL-lactatedehydrogenaseAchain(Fragment)OS=HomosapiensGN=LDHAPE=1SV=8;tr|F5H8H6|F5H8H6_HUMANL-lactatedehydrogenaseAchainO…	1	1	1	1	313860000	18064000	38613000	1	117070000	31440000	6.2772e+07	4.10374e+07	1.52963	0.750069
sp|Q99878|H2A1J_HUMANHistoneH2Atype1-JOS=HomosapiensGN=HIST1H2AJPE=1SV=3;sp|Q96KK5|H2A1H_HUMANHistoneH2Atype1-HOS=HomosapiensGN=HIST1H2AHPE=1SV=3;sp|Q9BTM1|H2AJ_HUMANHistoneH2A.JOS=HomosapiensGN=H2AFJPE=1SV=1;sp|Q16777|H2A2C_HUMANHistoneH2Atype2-COS=HomosapiensGN=HIST2H2ACPE=1SV=4;sp|Q6FI13|H2A2A_HUMANHistoneH2Atype2-AOS=HomosapiensGN=HIST2H2AA3PE=1SV=3;sp|P0C0S8|H2A1_HUMANHistoneH2Atype1OS=Homos…	1	109990000	1	801650000	68392000	1	1	1	1408900000	86192000	1.96006e+08	2.99018e+08	0.655499	0.753719
sp|P01031|CO5_HUMANComplementC5OS=HomosapiensGN=C5PE=1SV=4	116720000	1	1	1	1	45210000	41975000	1	18252000	49549000	2.3344e+07	3.09972e+07	0.7531	0.769001
sp|P50238|CRIP1_HUMANCysteine-richprotein1OS=HomosapiensGN=CRIP1PE=1SV=3;tr|K4DIB9|K4DIB9_HUMANUncharacterizedprotein(Fragment)OS=HomosapiensPE=4SV=1;tr|H3BRQ4|H3BRQ4_HUMANUncharacterizedprotein(Fragment)OS=HomosapiensPE=1SV=1	217230000	1	1	1	1	13504000	28950000	1	63436000	43615000	4.3446e+07	2.9901e+07	1.45299	0.770341
sp|P02750|A2GL_HUMANLeucine-richalpha-2-glycoproteinOS=HomosapiensGN=LRG1PE=1SV=2	32878000	43980000	26910000	1	1	39356000	44199000	1	1	1	2.07536e+07	1.6711e+07	1.24191	0.773633
sp|P37802|TAGL2_HUMANTransgelin-2OS=HomosapiensGN=TAGLN2PE=1SV=3;tr|X6RJP6|X6RJP6_HUMANTransgelin-2(Fragment)OS=HomosapiensGN=TAGLN2PE=1SV=1;tr|C9J5W6|C9J5W6_HUMANTransgelin-3OS=HomosapiensGN=TAGLN3PE=1SV=1;sp|Q9UI15|TAGL3_HUMANTransgelin-3OS=HomosapiensGN=TAGLN3PE=1SV=2	1	90629000	46096000	31320000	1	34888000	57093000	1	24030000	23822000	3.3609e+07	2.79666e+07	1.20175	0.776478
sp|P28066|PSA5_HUMANProteasomesubunitalphatype-5OS=HomosapiensGN=PSMA5PE=1SV=3	65221000	86860000	61716000	206560000	1	63059000	69305000	1	169840000	54450000	8.40714e+07	7.13308e+07	1.17861	0.77774
tr|B4DLR8|B4DLR8_HUMANNAD(P)Hdehydrogenase[quinone]1OS=HomosapiensGN=NQO1PE=1SV=1;tr|H3BNV2|H3BNV2_HUMANNAD(P)Hdehydrogenase[quinone]1OS=HomosapiensGN=NQO1PE=1SV=1;sp|P15559|NQO1_HUMANNAD(P)Hdehydrogenase[quinone]1OS=HomosapiensGN=NQO1PE=1SV=1;tr|H3BRK3|H3BRK3_HUMANNAD(P)Hdehydrogenase[quinone]1OS=HomosapiensGN=NQO1PE=1SV=1	1	19843000	10025000	9743000	1	1	1	1	24369000	6531500	7.9222e+06	6.1801e+06	1.28189	0.779067
sp|A0M8Q6|IGLC7_HUMANImmunoglobulinlambdaconstant7OS=HomosapiensGN=IGLC7PE=1SV=3	29241000	25025000	19521000	19084000	1	23672000	18168000	1	16095000	25334000	1.85742e+07	1.66538e+07	1.11531	0.782654
sp|P19652|A1AG2_HUMANAlpha-1-acidglycoprotein2OS=HomosapiensGN=ORM2PE=1SV=2	275030000	287390000	176900000	1	1	275920000	326250000	1	1	1	1.47864e+08	1.20434e+08	1.22776	0.785667
sp|P59666|DEF3_HUMANNeutrophildefensin3OS=HomosapiensGN=DEFA3PE=1SV=1;sp|P59665|DEF1_HUMANNeutrophildefensin1OS=HomosapiensGN=DEFA1PE=1SV=1	1567800000	2205500000	876250000	1628000000	1	742120000	589260000	1	5233900000	1112200000	1.25551e+09	1.5355e+09	0.817658	0.789628
sp|A0A075B6H9|LV469_HUMANImmunoglobulinlambdavariable4-69OS=HomosapiensGN=IGLV4-69PE=1SV=1	1	1	1	40018000	1	1	1	1	29356000	24180000	8.0036e+06	1.07072e+07	0.747497	0.801063
sp|A0A0A0MT36|KVD21_HUMANImmunoglobulinkappavariable6D-21OS=HomosapiensGN=IGKV6D-21PE=3SV=1;tr|A0A0C4DH26|A0A0C4DH26_HUMANImmunoglobulinkappavariable6D-41(non-functional)(Fragment)OS=HomosapiensGN=IGKV6D-41PE=4SV=1	48450000	1	1	1	1	1	1	1	36681000	27720000	9.69e+06	1.28802e+07	0.752318	0.806122
sp|P25815|S100P_HUMANProteinS100-POS=HomosapiensGN=S100PPE=1SV=2	1	1	1	50029000	1	1	1	1	45613000	19815000	1.00058e+07	1.30856e+07	0.764642	0.824659
tr|E7ENL6|E7ENL6_HUMANCollagenalpha-3(VI)chainOS=HomosapiensGN=COL6A3PE=1SV=2;sp|P12111|CO6A3_HUMANCollagenalpha-3(VI)chainOS=HomosapiensGN=COL6A3PE=1SV=5	1	1	35309000	1	1	1	1	1	16781000	9603900	7.0618e+06	5.27698e+06	1.33823	0.82581
sp|P61981|1433G_HUMAN14-3-3proteingammaOS=HomosapiensGN=YWHAGPE=1SV=2	1	1	45107000	1	1	24721000	33391000	1	1	1	9.0214e+06	1.16224e+07	0.776208	0.827801
sp|Q9H3R2|MUC13_HUMANMucin-13OS=HomosapiensGN=MUC13PE=1SV=3	10951000	1	1	1	1	7430000	6613300	1	1	1	2.1902e+06	2.80866e+06	0.779803	0.829993
sp|P07357|CO8A_HUMANComplementcomponentC8alphachainOS=HomosapiensGN=C8APE=1SV=2	237270000	1	9356500	1	1	31930000	36984000	1	13009000	108740000	4.93253e+07	3.81326e+07	1.29352	0.830678
tr|A0A1W2PP80|A0A1W2PP80_HUMANProteinSCO2homolog,mitochondrial(Fragment)OS=HomosapiensGN=SCO2PE=4SV=1;tr|C9JGI3|C9JGI3_HUMANThymidinephosphorylase(Fragment)OS=HomosapiensGN=TYMPPE=1SV=1;sp|P19971|TYPH_HUMANThymidinephosphorylaseOS=HomosapiensGN=TYMPPE=1SV=2	23728000	1	1	1	1	1	1	1	1	31937000	4.7456e+06	6.3874e+06	0.742963	0.841691
sp|P02760|AMBP_HUMANProteinAMBPOS=HomosapiensGN=AMBPPE=1SV=1;tr|S4R471|S4R471_HUMANProteinAMBP(Fragment)OS=HomosapiensGN=AMBPPE=1SV=1;tr|S4R3Y4|S4R3Y4_HUMANProteinAMBPOS=HomosapiensGN=AMBPPE=1SV=1;CON__P00978	526430000	1	1	8454600	1	63499000	64230000	1	60939000	234200000	1.06977e+08	8.45736e+07	1.2649	0.846466
sp|P10909|CLUS_HUMANClusterinOS=HomosapiensGN=CLUPE=1SV=1;tr|E7ETB4|E7ETB4_HUMANClusterin(Fragment)OS=HomosapiensGN=CLUPE=1SV=1;tr|H0YLK8|H0YLK8_HUMANClusterin(Fragment)OS=HomosapiensGN=CLUPE=1SV=1;tr|E7ERK6|E7ERK6_HUMANClusterin(Fragment)OS=HomosapiensGN=CLUPE=1SV=1;tr|E5RJZ5|E5RJZ5_HUMANClusterin(Fragment)OS=HomosapiensGN=CLUPE=1SV=1;tr|H0YC35|H0YC35_HUMANClusterin(Fragment)OS=HomosapiensGN=CLU…	3818800000	72299000	1	1	11459000	945260000	983210000	1	1014300000	1741200000	7.80512e+08	9.36794e+08	0.833173	0.851554
tr|E9PDH4|E9PDH4_HUMAN1-phosphatidylinositol3-phosphate5-kinase(Fragment)OS=HomosapiensGN=PIKFYVEPE=1SV=1;sp|Q9Y2I7|FYV1_HUMAN1-phosphatidylinositol3-phosphate5-kinaseOS=HomosapiensGN=PIKFYVEPE=1SV=3	2724000000	1	1	1	1	655270000	1478500000	1	1	1	5.448e+08	4.26754e+08	1.27661	0.853297
sp|P01700|LV147_HUMANImmunoglobulinlambdavariable1-47OS=HomosapiensGN=IGLV1-47PE=1SV=2	1096800000	1	1	1	28415000	237780000	344780000	1	127170000	208960000	2.25043e+08	1.83738e+08	1.2248	0.859221
sp|P00747|PLMN_HUMANPlasminogenOS=HomosapiensGN=PLGPE=1SV=2;tr|Q5TEH5|Q5TEH5_HUMANHCG2029799,isoformCRA_bOS=HomosapiensGN=PLGPE=1SV=1;tr|A6PVI2|A6PVI2_HUMANPlasminogen(Fragment)OS=HomosapiensGN=PLGPE=1SV=1	764920000	1	1	1	1	201010000	169630000	1	43686000	206930000	1.52984e+08	1.24251e+08	1.23125	0.860978
tr|F8VV56|F8VV56_HUMANCD63antigenOS=HomosapiensGN=CD63PE=1SV=1;tr|F8W022|F8W022_HUMANTetraspanin(Fragment)OS=HomosapiensGN=CD63PE=1SV=1;tr|F8VWK8|F8VWK8_HUMANTetraspanin(Fragment)OS=HomosapiensGN=CD63PE=1SV=1;sp|P08962|CD63_HUMANCD63antigenOS=HomosapiensGN=CD63PE=1SV=2	1	1	1	8682000	1	1	1	1	11016000	1	1.7364e+06	2.2032e+06	0.788126	0.871967
tr|A0A0A0MSV6|A0A0A0MSV6_HUMANComplementC1qsubcomponentsubunitB(Fragment)OS=HomosapiensGN=C1QBPE=1SV=6;tr|D6R934|D6R934_HUMANComplementC1qsubcomponentsubunitBOS=HomosapiensGN=C1QBPE=1SV=1;sp|P02746|C1QB_HUMANComplementC1qsubcomponentsubunitBOS=HomosapiensGN=C1QBPE=1SV=3;tr|D6RGJ1|D6RGJ1_HUMANComplementC1qsubcomponentsubunitB(Fragment)OS=HomosapiensGN=C1QBPE=1SV=1	884770000	1	1	1	1	135380000	125700000	1	137560000	660510000	1.76954e+08	2.1183e+08	0.835359	0.872873
sp|P08571|CD14_HUMANMonocytedifferentiationantigenCD14OS=HomosapiensGN=CD14PE=1SV=2;tr|D6RFL4|D6RFL4_HUMANMonocytedifferentiationantigenCD14(Fragment)OS=HomosapiensGN=CD14PE=1SV=1	5899100	1	1	1	1	1	4768300	1	1	1	1.17982e+06	953661	1.23715	0.885181
tr|Q5JNW7|Q5JNW7_HUMANProteasomesubunitbetatype-8OS=HomosapiensGN=PSMB8PE=1SV=1;tr|A0A140T998|A0A140T998_HUMANProteasomesubunitbetatype-8OS=HomosapiensGN=PSMB8PE=1SV=1;tr|X5D2R7|X5D2R7_HUMANProteasomesubunitbetatypeOS=HomosapiensGN=PSM8PE=1SV=1;sp|P28062|PSB8_HUMANProteasomesubunitbetatype-8OS=HomosapiensGN=PSMB8PE=1SV=3	1	24381000	19104000	61819000	1	1	1	1	67120000	25964000	2.10608e+07	1.86168e+07	1.13128	0.891361
sp|P05090|APOD_HUMANApolipoproteinDOS=HomosapiensGN=APODPE=1SV=1;tr|C9JF17|C9JF17_HUMANApolipoproteinD(Fragment)OS=HomosapiensGN=APODPE=1SV=1;tr|C9JX71|C9JX71_HUMANApolipoproteinD(Fragment)OS=HomosapiensGN=APODPE=1SV=1	229720000	66334000	31525000	141530000	1	47697000	46366000	1	264290000	67889000	9.38218e+07	8.52484e+07	1.10057	0.893332
sp|P68871|HBB_HUMANHemoglobinsubunitbetaOS=HomosapiensGN=HBBPE=1SV=2;tr|F8W6P5|F8W6P5_HUMANHemoglobinsubunitbeta(Fragment)OS=HomosapiensGN=HBBPE=1SV=1;tr|A0A0J9YWK4|A0A0J9YWK4_HUMANHemoglobinsubunitbetaOS=HomosapiensGN=HBBPE=1SV=1	13862000000	1326500000	457180000	873110000	5344400000	2660700000	2658300000	1	13598000000	530680000	4372638000	3.88954e+09	1.12421	0.89501
tr|G3XAM2|G3XAM2_HUMANComplementfactorIOS=HomosapiensGN=CFIPE=1SV=1;sp|P05156|CFAI_HUMANComplementfactorIOS=HomosapiensGN=CFIPE=1SV=2;tr|E7ETH0|E7ETH0_HUMANComplementfactorIOS=HomosapiensGN=CFIPE=1SV=1;tr|A0A087X0I2|A0A087X0I2_HUMANComplementfactorIOS=HomosapiensGN=CFIPE=1SV=1;tr|D6R9Z8|D6R9Z8_HUMANComplementfactorIOS=HomosapiensGN=CFIPE=1SV=1;CON__Q32PI4	100710000	1	1	1	1	38643000	42748000	1	15603000	18272000	2.0142e+07	2.30532e+07	0.873718	0.896247
sp|P14174|MIF_HUMANMacrophagemigrationinhibitoryfactorOS=HomosapiensGN=MIFPE=1SV=4	18427000	1	1	1	1	6994800	8874200	1	1	1	3.6854e+06	3.1738e+06	1.16119	0.905541
tr|S4R3V8|S4R3V8_HUMANLipolysis-stimulatedlipoproteinreceptorOS=HomosapiensGN=LSRPE=1SV=2;sp|Q86X29|LSR_HUMANLipolysis-stimulatedlipoproteinreceptorOS=HomosapiensGN=LSRPE=1SV=4	15652000	1	1	1	1	5033800	2547400	1	1	6027300	3.1304e+06	2.7217e+06	1.15016	0.906457
sp|Q96PD5|PGRP2_HUMANN-acetylmuramoyl-L-alanineamidaseOS=HomosapiensGN=PGLYRP2PE=1SV=1;tr|M0R2W8|M0R2W8_HUMANN-acetylmuramoyl-L-alanineamidase(Fragment)OS=HomosapiensGN=PGLYRP2PE=1SV=2;CON__ENSEMBL:ENSBTAP00000016285	80104000	1	1	1	1	10599000	13744000	1	1	67878000	1.60208e+07	1.84442e+07	0.868609	0.908465
sp|P08603|CFAH_HUMANComplementfactorHOS=HomosapiensGN=CFHPE=1SV=4;tr|A0A0D9SG88|A0A0D9SG88_HUMANComplementfactorHOS=HomosapiensGN=CFHPE=1SV=1;tr|Q5TFM2|Q5TFM2_HUMANComplementfactorHOS=HomosapiensGN=CFHPE=1SV=1;tr|A0A087WYK9|A0A087WYK9_HUMANComplementfactorH-relatedprotein3OS=HomosapiensGN=CFHR3PE=1SV=1;tr|Q6NSD3|Q6NSD3_HUMANCFHR3proteinOS=HomosapiensGN=CFHR3PE=1SV=1;sp|Q02985|FHR3_HUMANComplement…	981750000	1	42307000	1	32302000	363050000	428320000	1	25801000	359060000	2.11272e+08	2.35246e+08	0.898088	0.913358
sp|P02748|CO9_HUMANComplementcomponentC9OS=HomosapiensGN=C9PE=1SV=2;CON__Q3MHN2	868260000	1	1	1	1	70111000	62013000	1	210050000	642350000	1.73652e+08	1.96905e+08	0.881908	0.914208
sp|A0A075B6J9|LV218_HUMANImmunoglobulinlambdavariable2-18OS=HomosapiensGN=IGLV2-18PE=3SV=2	20976000	1	1	1	22040000	4462100	10970000	1	23925000	1	8.6032e+06	7.87142e+06	1.09297	0.91842
sp|P27824|CALX_HUMANCalnexinOS=HomosapiensGN=CANXPE=1SV=2	1	1	1	10043000	1	1	8836300	1	1	1	2.0086e+06	1.76726e+06	1.13656	0.93034
sp|P80748|LV321_HUMANImmunoglobulinlambdavariable3-21OS=HomosapiensGN=IGLV3-21PE=1SV=2;sp|A0A075B6K5|LV39_HUMANImmunoglobulinlambdavariable3-9OS=HomosapiensGN=IGLV3-9PE=3SV=1;sp|A0A075B6K2|LV312_HUMANImmunoglobulinlambdavariable3-12OS=HomosapiensGN=IGLV3-12PE=3SV=2	339900000	139020000	107200000	55692000	1	81415000	104190000	1	358670000	66696000	1.28362e+08	1.22194e+08	1.05048	0.943637
sp|P01591|IGJ_HUMANImmunoglobulinJchainOS=HomosapiensGN=JCHAINPE=1SV=4;tr|D6RD17|D6RD17_HUMANImmunoglobulinJchain(Fragment)OS=HomosapiensGN=JCHAINPE=1SV=8;tr|D6RHJ6|D6RHJ6_HUMANImmunoglobulinJchain(Fragment)OS=HomosapiensGN=JCHAINPE=1SV=1;tr|C9JA05|C9JA05_HUMANImmunoglobulinJchain(Fragment)OS=HomosapiensGN=JCHAINPE=1SV=1	30528000000	2901300000	586340000	2175100000	1947200000	5623200000	7978100000	1	13766000000	13046000000	7627588000	8.08266e+09	0.943698	0.943937
sp|P28070|PSB4_HUMANProteasomesubunitbetatype-4OS=HomosapiensGN=PSMB4PE=1SV=4	1	1	1	27578000	1	1	1	1	15990000	9433300	5.5156e+06	5.08466e+06	1.08475	0.948114
sp|Q8N4F0|BPIB2_HUMANBPIfold-containingfamilyBmember2OS=HomosapiensGN=BPIFB2PE=1SV=2	82828000	1	1	1	1	12295000	12518000	1	1	51917000	1.65656e+07	1.5346e+07	1.07947	0.950714
tr|A0A1B0GV06|A0A1B0GV06_HUMANAcidceramidase(Fragment)OS=HomosapiensGN=ASAH1PE=1SV=1;tr|A0A1B0GTP7|A0A1B0GTP7_HUMANAcidceramidaseOS=HomosapiensGN=ASAH1PE=1SV=1;tr|A0A1B0GUE3|A0A1B0GUE3_HUMANAcidceramidaseOS=HomosapiensGN=ASAH1PE=1SV=1;tr|A0A1B0GUG1|A0A1B0GUG1_HUMANAcidceramidaseOS=HomosapiensGN=ASAH1PE=1SV=1;tr|A0A1B0GUW4|A0A1B0GUW4_HUMANAcidceramidase(Fragment)OS=HomosapiensGN=ASAH1PE=1SV=1;tr|E…	25671000	1	1	1	1	8928700	10239000	1	8221400	1	5.1342e+06	5.47782e+06	0.937271	0.952657
tr|E9PQD6|E9PQD6_HUMANSerumamyloidAproteinOS=HomosapiensGN=SAA1PE=1SV=1;sp|P0DJI8|SAA1_HUMANSerumamyloidA-1proteinOS=HomosapiensGN=SAA1PE=1SV=1;tr|E9PR14|E9PR14_HUMANSerumamyloidAproteinOS=HomosapiensGN=SAA2PE=3SV=1;tr|G3V1D9|G3V1D9_HUMANSerumamyloidAproteinOS=HomosapiensGN=SAA2PE=3SV=1;sp|P0DJI9|SAA2_HUMANSerumamyloidA-2proteinOS=HomosapiensGN=SAA2PE=1SV=1	15024000	1	1	1	1	1	1	1	16328000	1	3.0048e+06	3.2656e+06	0.920137	0.954577
sp|P01709|LV208_HUMANImmunoglobulinlambdavariable2-8OS=HomosapiensGN=IGLV2-8PE=1SV=2;sp|P01706|LV211_HUMANImmunoglobulinlambdavariable2-11OS=HomosapiensGN=IGLV2-11PE=1SV=2	27790000	1	1	1	1	1	1	1	7919400	21850000	5.558e+06	5.95388e+06	0.933509	0.956303
tr|C9JS50|C9JS50_HUMANMetalloreductaseSTEAP4OS=HomosapiensGN=STEAP4PE=1SV=1;sp|Q687X5|STEA4_HUMANMetalloreductaseSTEAP4OS=HomosapiensGN=STEAP4PE=1SV=1	1	1	1	1	12139000	3108300	1	1	8317200	1	2.4278e+06	2.2851e+06	1.06245	0.96223
sp|P98088|MUC5A_HUMANMucin-5ACOS=HomosapiensGN=MUC5ACPE=1SV=4	6326700000	172390000	16773000	1827600000	269570000	1880700000	2280700000	1	3285400000	853590000	1722606600	1.66008e+09	1.03767	0.963519
sp|P43353|AL3B1_HUMANAldehydedehydrogenasefamily3memberB1OS=HomosapiensGN=ALDH3B1PE=1SV=1;tr|A0A087X2D4|A0A087X2D4_HUMANAldehydedehydrogenasefamily3memberB1OS=HomosapiensGN=ALDH3B1PE=1SV=1;tr|A0A087WUF8|A0A087WUF8_HUMANAldehydedehydrogenasefamily3memberB1OS=HomosapiensGN=ALDH3B1PE=1SV=1;tr|Q9BUJ8|Q9BUJ8_HUMANALDH3B1proteinOS=HomosapiensGN=ALDH3B1PE=1SV=1;tr|A0A087X192|A0A087X192_HUMANAldehydedehy…	22331000	529470000	54231000	1	1	195450000	199770000	1	62144000	123200000	1.21206e+08	1.16113e+08	1.04387	0.964058
tr|C9JIZ3|C9JIZ3_HUMANGrancalcin(Fragment)OS=HomosapiensGN=GCAPE=1SV=1;tr|H7C2Z6|H7C2Z6_HUMANGrancalcin(Fragment)OS=HomosapiensGN=GCAPE=1SV=1;tr|H7BXD5|H7BXD5_HUMANGrancalcinOS=HomosapiensGN=GCAPE=1SV=1;sp|P28676|GRAN_HUMANGrancalcinOS=HomosapiensGN=GCAPE=1SV=2	1	1	1	23376000	1	1	1	1	11212000	10920000	4.6752e+06	4.4264e+06	1.05621	0.964409
sp|P01624|KV315_HUMANImmunoglobulinkappavariable3-15OS=HomosapiensGN=IGKV3-15PE=1SV=2;sp|A0A087WSY6|KVD15_HUMANImmunoglobulinkappavariable3D-15OS=HomosapiensGN=IGKV3D-15PE=3SV=6;tr|A0A0C4DH90|A0A0C4DH90_HUMANImmunoglobulinkappavariable3/OR2-268(non-functional)(Fragment)OS=HomosapiensGN=IGKV3OR2-268PE=4SV=5;tr|A0A075B6H7|A0A075B6H7_HUMANImmunoglobulinkappavariable3-7(non-functional)(Fragment)OS=Ho…	1302200000	1	1	28669000	1	161070000	91588000	1	876320000	269630000	2.66174e+08	2.79722e+08	0.951567	0.965337
sp|P20160|CAP7_HUMANAzurocidinOS=HomosapiensGN=AZU1PE=1SV=3;tr|A0A087WXP0|A0A087WXP0_HUMANAzurocidinOS=HomosapiensGN=AZU1PE=1SV=1	15131000	477650000	2318000000	5856300000	1	1	1	1	8194600000	98871000	1.73342e+09	1.65869e+09	1.04505	0.970797
sp|P04217|A1BG_HUMANAlpha-1B-glycoproteinOS=HomosapiensGN=A1BGPE=1SV=4;tr|M0R009|M0R009_HUMANAlpha-1B-glycoprotein(Fragment)OS=HomosapiensGN=A1BGPE=1SV=8;CON__Q2KJF1	815120000	1	1	1	1	226120000	244130000	1	156490000	161500000	1.63024e+08	1.57648e+08	1.0341	0.975345
sp|P01602|KV105_HUMANImmunoglobulinkappavariable1-5OS=HomosapiensGN=IGKV1-5PE=1SV=2	1	1	1	1	225960000	16242000	18850000	1	157180000	42040000	4.5192e+07	4.68624e+07	0.964355	0.975796
sp|P02647|APOA1_HUMANApolipoproteinA-IOS=HomosapiensGN=APOA1PE=1SV=1;tr|F8W696|F8W696_HUMANApolipoproteinA-IOS=HomosapiensGN=APOA1PE=1SV=1;CON__P15497	14742000000	504020000	1	179880000	1070200000	1464200000	1300800000	1	7348700000	6873300000	3.29922e+09	3.3974e+09	0.971101	0.976665
sp|Q14764|MVP_HUMANMajorvaultproteinOS=HomosapiensGN=MVPPE=1SV=4;tr|H3BRL2|H3BRL2_HUMANMajorvaultprotein(Fragment)OS=HomosapiensGN=MVPPE=1SV=8;tr|H3BQK6|H3BQK6_HUMANMajorvaultprotein(Fragment)OS=HomosapiensGN=MVPPE=1SV=1;tr|H3BUK7|H3BUK7_HUMANMajorvaultprotein(Fragment)OS=HomosapiensGN=MVPPE=1SV=1;tr|H3BNF6|H3BNF6_HUMANMajorvaultprotein(Fragment)OS=HomosapiensGN=MVPPE=1SV=1;tr|H3BP76|H3BP76_HUMAN…	306420000	187170000	95122000	89340000	151400000	151330000	99272000	1	315700000	253180000	165890400	1.63896e+08	1.01217	0.977448
sp|P80723|BASP1_HUMANBrainacidsolubleprotein1OS=HomosapiensGN=BASP1PE=1SV=2;tr|U3KQP0|U3KQP0_HUMANBrainacidsolubleprotein1(Fragment)OS=HomosapiensGN=BASP1PE=1SV=8	34533000	1	1	1	1	16667000	16794000	1	1	1	6.9066e+06	6.6922e+06	1.03204	0.979356
sp|P02679|FIBG_HUMANFibrinogengammachainOS=HomosapiensGN=FGGPE=1SV=3;tr|C9JEU5|C9JEU5_HUMANFibrinogengammachainOS=HomosapiensGN=FGGPE=1SV=1;tr|C9JC84|C9JC84_HUMANFibrinogengammachainOS=HomosapiensGN=FGGPE=1SV=1;tr|C9JPQ9|C9JPQ9_HUMANFibrinogengammachain(Fragment)OS=HomosapiensGN=FGGPE=1SV=1;tr|C9JU00|C9JU00_HUMANFibrinogengammachain(Fragment)OS=HomosapiensGN=FGGPE=1SV=1	291270000	1	1	1	641790000	148720000	242230000	1	202680000	323290000	1.86612e+08	1.83384e+08	1.0176	0.98191
sp|O75594|PGRP1_HUMANPeptidoglycanrecognitionprotein1OS=HomosapiensGN=PGLYRP1PE=1SV=1	1	1	1	27891000	1	1	1	1	27057000	1	5.5782e+06	5.4114e+06	1.03082	0.983402
sp|P01705|LV223_HUMANImmunoglobulinlambdavariable2-23OS=HomosapiensGN=IGLV2-23PE=1SV=2	14855000	1	12320000	1	1	4396600	5549500	1	9706800	7876200	5.435e+06	5.50582e+06	0.987137	0.985351
tr|V9GYG9|V9GYG9_HUMANApolipoproteinA-II(Fragment)OS=HomosapiensGN=APOA2PE=1SV=1;sp|P02652|APOA2_HUMANApolipoproteinA-IIOS=HomosapiensGN=APOA2PE=1SV=1;tr|V9GYM3|V9GYM3_HUMANApolipoproteinA-IIOS=HomosapiensGN=APOA2PE=1SV=1;tr|V9GYE3|V9GYE3_HUMANApolipoproteinA-IIOS=HomosapiensGN=APOA2PE=1SV=1;tr|V9GYC1|V9GYC1_HUMANApolipoproteinA-II(Fragment)OS=HomosapiensGN=APOA2PE=1SV=1;tr|V9GYS1|V9GYS1_HUMANApo…	2337000000	199980000	1	214030000	1	459930000	373270000	1	902320000	982710000	5.50202e+08	5.43646e+08	1.01206	0.989526
sp|P63218|GBG5_HUMANGuaninenucleotide-bindingproteinG(I)/G(S)/G(O)subunitgamma-5OS=HomosapiensGN=GNG5PE=1SV=3	111080000	1	1	25196000	1	1	1	1	67398000	68250000	2.72552e+07	2.71296e+07	1.00463	0.996427
sp|Q99536|VAT1_HUMANSynapticvesiclemembraneproteinVAT-1homologOS=HomosapiensGN=VAT1PE=1SV=2;tr|K7ESA3|K7ESA3_HUMANSynapticvesiclemembraneproteinVAT-1homolog(Fragment)OS=HomosapiensGN=VAT1PE=1SV=1;tr|K7EJM4|K7EJM4_HUMANSynapticvesiclemembraneproteinVAT-1homolog(Fragment)OS=HomosapiensGN=VAT1PE=1SV=1;tr|K7ERT7|K7ERT7_HUMANSynapticvesiclemembraneproteinVAT-1homolog(Fragment)OS=HomosapiensGN=VAT1PE=1…	1	1	40946000	1	1	1	1	1	16954000	23820000	8.1892e+06	8.1548e+06	1.00422	0.997244

## Sheet: PaedvCon
Protein IDs	LFQ intensity Paed 1	LFQ intensity Paed2	LFQ intensity Paed3	LFQ intensity Paed4	LFQ intensity Paed5	LFQ intensity CTL1	LFQ intensity CTL2	LFQ intensity CTL3	LFQ intensity CTL4	LFQ intensity CTL5	Mean Adults	Mean CTL	Ratio	sig
sp|P60709|ACTB_HUMANActin,cytoplasmic1OS=HomosapiensGN=ACTBPE=1SV=1;tr|G5E9R0|G5E9R0_HUMANActin,cytoplasmic1OS=HomosapiensGN=ACTBPE=1SV=1;tr|E7EVS6|E7EVS6_HUMANActin,cytoplasmic1(Fragment)OS=HomosapiensGN=ACTBPE=1SV=8;tr|C9JTX5|C9JTX5_HUMANActin,cytoplasmic1(Fragment)OS=HomosapiensGN=ACTBPE=1SV=1;tr|C9JZR7|C9JZR7_HUMANActin,cytoplasmic1(Fragment)OS=HomosapiensGN=ACTBPE=1SV=8;tr|C9JUM1|C9JUM1_HUMA…	1	1	1	63808000	1	587280000	551360000	701220000	501010000	1084300000	1.27616e+07	685034000	0.0186291	0.000220792		Paediatric Group 2(5-6yrs)
tr|B4DQI4|B4DQI4_HUMANProteinABHD14BOS=HomosapiensGN=ABHD14BPE=1SV=1;tr|F8W9U3|F8W9U3_HUMANProteinABHD14BOS=HomosapiensGN=ABHD14BPE=1SV=1;sp|Q96IU4|ABHEB_HUMANProteinABHD14BOS=HomosapiensGN=ABHD14BPE=1SV=1	1	1	1	5107900	1	39920000	39463000	74799000	55086000	25872000	1.02158e+06	47028000	0.0217228	0.00059115
sp|P02679|FIBG_HUMANFibrinogengammachainOS=HomosapiensGN=FGGPE=1SV=3;tr|C9JEU5|C9JEU5_HUMANFibrinogengammachainOS=HomosapiensGN=FGGPE=1SV=1;tr|C9JC84|C9JC84_HUMANFibrinogengammachainOS=HomosapiensGN=FGGPE=1SV=1;tr|C9JPQ9|C9JPQ9_HUMANFibrinogengammachain(Fragment)OS=HomosapiensGN=FGGPE=1SV=1;tr|C9JU00|C9JU00_HUMANFibrinogengammachain(Fragment)OS=HomosapiensGN=FGGPE=1SV=1	30289000	7871700	33234000	26670000	1	88083000	132740000	110800000	77083000	61796000	1.96129e+07	94100400	0.208426	0.000765942
sp|P30740|ILEU_HUMANLeukocyteelastaseinhibitorOS=HomosapiensGN=SERPINB1PE=1SV=1	20277000	8900400	31165000	60607000	1	190630000	156210000	346940000	156420000	387820000	2.41899e+07	247604000	0.0976958	0.00229809
sp|P50990|TCPQ_HUMANT-complexprotein1subunitthetaOS=HomosapiensGN=CCT8PE=1SV=4;tr|H7C4C8|H7C4C8_HUMANT-complexprotein1subunittheta(Fragment)OS=HomosapiensGN=CCT8PE=1SV=1;tr|H7C2U0|H7C2U0_HUMANT-complexprotein1subunittheta(Fragment)OS=HomosapiensGN=CCT8PE=1SV=1	1	1	3380700	1	1	18804000	23110000	55754000	43742000	16159000	676141	31513800	0.0214554	0.00419
sp|P25788|PSA3_HUMANProteasomesubunitalphatype-3OS=HomosapiensGN=PSMA3PE=1SV=2;tr|G3V3W4|G3V3W4_HUMANProteasomesubunitalphatype-3OS=HomosapiensGN=PSMA3PE=1SV=1;tr|G3V5N4|G3V5N4_HUMANProteasomesubunitalphatype-3OS=HomosapiensGN=PSMA3PE=1SV=1;tr|G3V4X5|G3V4X5_HUMANProteasomeendopeptidasecomplexOS=HomosapiensGN=PSMA3PE=1SV=1	14603000	1	4993900	1	1	46112000	11084000	37681000	55478000	74703000	3.91938e+06	45011600	0.0870749	0.00535732
sp|P07355|ANXA2_HUMANAnnexinA2OS=HomosapiensGN=ANXA2PE=1SV=2;tr|H0YN42|H0YN42_HUMANAnnexin(Fragment)OS=HomosapiensGN=ANXA2PE=1SV=1;tr|H0YMD0|H0YMD0_HUMANAnnexin(Fragment)OS=HomosapiensGN=ANXA2PE=1SV=1;tr|H0YMU9|H0YMU9_HUMANAnnexinOS=HomosapiensGN=ANXA2PE=1SV=1;sp|A6NMY6|AXA2L_HUMANPutativeannexinA2-likeproteinOS=HomosapiensGN=ANXA2P2PE=5SV=2;tr|H0YKS4|H0YKS4_HUMANAnnexin(Fragment)OS=HomosapiensGN…	285120000	537480000	494940000	727450000	56118000	1278400000	997050000	629550000	1535900000	1309500000	420221600	1150080000	0.365385	0.00546686
sp|P04083|ANXA1_HUMANAnnexinA1OS=HomosapiensGN=ANXA1PE=1SV=2;tr|Q5T3N1|Q5T3N1_HUMANAnnexin(Fragment)OS=HomosapiensGN=ANXA1PE=1SV=1;tr|Q5T3N0|Q5T3N0_HUMANAnnexin(Fragment)OS=HomosapiensGN=ANXA1PE=1SV=1	381510000	429240000	24616000	444580000	284300000	2764300000	900780000	5338200000	2678600000	3414600000	312849200	3019296000	0.103617	0.00548703
sp|Q9ULV0|MYO5B_HUMANUnconventionalmyosin-VbOS=HomosapiensGN=MYO5BPE=1SV=3;tr|A0A0A0MR36|A0A0A0MR36_HUMANUnconventionalmyosin-Vb(Fragment)OS=HomosapiensGN=MYO5BPE=1SV=1;tr|H0YM93|H0YM93_HUMANUnconventionalmyosin-Vc(Fragment)OS=HomosapiensGN=MYO5CPE=1SV=1;tr|H0YMK3|H0YMK3_HUMANUnconventionalmyosin-VcOS=HomosapiensGN=MYO5CPE=1SV=1;sp|Q9NQX4|MYO5C_HUMANUnconventionalmyosin-VcOS=HomosapiensGN=MYO5CPE…	300430000	59627000	276170000	96351000	127670000	1	1	7461900	1	1	172049600	1.49238e+06	115.285	0.00817197
sp|P29508|SPB3_HUMANSerpinB3OS=HomosapiensGN=SERPINB3PE=1SV=2	26409000	11861000	9621600	38913000	1	136610000	100540000	40353000	198760000	85800000	1.73609e+07	112412600	0.154439	0.0084631
sp|P49257|LMAN1_HUMANProteinERGIC-53OS=HomosapiensGN=LMAN1PE=1SV=2	27649000	18486000	1	24980000	14546000	1	1	1	1678800	1	1.71322e+07	335761	51.025	0.00880818
tr|Q5SZU1|Q5SZU1_HUMAND-3-phosphoglyceratedehydrogenaseOS=HomosapiensGN=PHGDHPE=1SV=1;sp|O43175|SERA_HUMAND-3-phosphoglyceratedehydrogenaseOS=HomosapiensGN=PHGDHPE=1SV=4	15743000	19227000	17248000	15571000	1	1	1	1	6171500	1	1.35578e+07	1.2343e+06	10.9842	0.00991593
tr|K7EQA9|K7EQA9_HUMANHsp90co-chaperoneCdc37(Fragment)OS=HomosapiensGN=CDC37PE=1SV=1;sp|Q16543|CDC37_HUMANHsp90co-chaperoneCdc37OS=HomosapiensGN=CDC37PE=1SV=1;tr|K7EKQ2|K7EKQ2_HUMANHsp90co-chaperoneCdc37(Fragment)OS=HomosapiensGN=CDC37PE=1SV=1;tr|K7EIU0|K7EIU0_HUMANHsp90co-chaperoneCdc37(Fragment)OS=HomosapiensGN=CDC37PE=1SV=1;tr|K7EL68|K7EL68_HUMANHsp90co-chaperoneCdc37(Fragment)OS=HomosapiensGN…	1	1	1	793990	1748500	18536000	20805000	29284000	13722000	1	508499	1.64694e+07	0.0308754	0.0108934
tr|C9JWL6|C9JWL6_HUMANCyclin-dependentkinase14(Fragment)OS=HomosapiensGN=CDK14PE=1SV=1;tr|F8WF96|F8WF96_HUMANCyclin-dependentkinase14OS=HomosapiensGN=CDK14PE=1SV=1;tr|C9IYJ9|C9IYJ9_HUMANCyclin-dependentkinase14(Fragment)OS=HomosapiensGN=CDK14PE=1SV=1;sp|O94921|CDK14_HUMANCyclin-dependentkinase14OS=HomosapiensGN=CDK14PE=1SV=3	67359000	42980000	33339000	40587000	1	1	1	6020400	1	1	3.6853e+07	1.20408e+06	30.6068	0.0114099
sp|Q6PIU2|NCEH1_HUMANNeutralcholesterolesterhydrolase1OS=HomosapiensGN=NCEH1PE=1SV=3;tr|A0A0R4J2G3|A0A0R4J2G3_HUMANArylacetamidedeacetylase-like1OS=HomosapiensGN=NCEH1PE=1SV=1;tr|A0A0A0MTJ9|A0A0A0MTJ9_HUMANNeutralcholesterolesterhydrolase1OS=HomosapiensGN=NCEH1PE=1SV=1;tr|H7C046|H7C046_HUMANNeutralcholesterolesterhydrolase1(Fragment)OS=HomosapiensGN=NCEH1PE=1SV=1	20226000	35901000	1	31217000	45447000	5135500	1	1	1	1	2.65582e+07	1.0271e+06	25.8574	0.0116565
sp|Q8TCJ2|STT3B_HUMANDolichyl-diphosphooligosaccharide--proteinglycosyltransferasesubunitSTT3BOS=HomosapiensGN=STT3BPE=1SV=1	8048200	8411600	1	14981000	9308100	1701900	1	1	1	1	8.14978e+06	340381	23.9431	0.0120345
sp|P52790|HXK3_HUMANHexokinase-3OS=HomosapiensGN=HK3PE=1SV=2;tr|H0Y8U9|H0Y8U9_HUMANPhosphotransferase(Fragment)OS=HomosapiensGN=HK3PE=1SV=1;tr|H0Y9N6|H0Y9N6_HUMANPhosphotransferase(Fragment)OS=HomosapiensGN=HK3PE=1SV=8	1	21523000	1	10138000	1	29886000	9984400	35308000	48510000	26829000	6.3322e+06	30103480	0.210348	0.013826
sp|P08758|ANXA5_HUMANAnnexinA5OS=HomosapiensGN=ANXA5PE=1SV=2;tr|D6RBE9|D6RBE9_HUMANAnnexinOS=HomosapiensGN=ANXA5PE=1SV=1;tr|D6RBL5|D6RBL5_HUMANAnnexinOS=HomosapiensGN=ANXA5PE=1SV=1;tr|E9PHT9|E9PHT9_HUMANAnnexinOS=HomosapiensGN=ANXA5PE=1SV=1;tr|D6RCN3|D6RCN3_HUMANAnnexinA5OS=HomosapiensGN=ANXA5PE=1SV=1	310480000	38468000	99410000	72152000	62322000	773630000	390420000	608690000	1444500000	432600000	116566400	729968000	0.159687	0.0145228
tr|B1AKD8|B1AKD8_HUMANRootletin(Fragment)OS=HomosapiensGN=CROCCPE=1SV=2;sp|Q5TZA2|CROCC_HUMANRootletinOS=HomosapiensGN=CROCCPE=1SV=1;sp|Q86T23|CROL1_HUMANPutativeciliaryrootletcoiled-coilprotein-like1proteinOS=HomosapiensGN=CROCCP2PE=5SV=1;tr|A0A087WW81|A0A087WW81_HUMANRootletin(Fragment)OS=HomosapiensGN=CROCCPE=1SV=6	1	1	1	1524400	1	8798700	10470000	21695000	20960000	1	304881	1.23847e+07	0.0246175	0.0180092
tr|Q53S08|Q53S08_HUMANRab6COS=HomosapiensGN=RAB6CPE=2SV=1;sp|Q9H0N0|RAB6C_HUMANRas-relatedproteinRab-6COS=HomosapiensGN=RAB6CPE=1SV=2	20302000	72083000	14086000	46371000	19544000	1	6479500	1	5213400	1	34477200	2.33858e+06	14.7428	0.0195484
sp|P28066|PSA5_HUMANProteasomesubunitalphatype-5OS=HomosapiensGN=PSMA5PE=1SV=3	108040000	34121000	27233000	25030000	74645000	1	1	1	23181000	1	53813800	4.6362e+06	11.6073	0.0197061
sp|P62328|TYB4_HUMANThymosinbeta-4OS=HomosapiensGN=TMSB4XPE=1SV=2	37212000	17082000	25152000	30149000	89153000	1	1	18491000	1	1	39749600	3.6982e+06	10.7484	0.0266629
sp|P28838|AMPL_HUMANCytosolaminopeptidaseOS=HomosapiensGN=LAP3PE=1SV=3;tr|H0Y9Q1|H0Y9Q1_HUMANCytosolaminopeptidase(Fragment)OS=HomosapiensGN=LAP3PE=1SV=8;tr|H0Y983|H0Y983_HUMANCytosolaminopeptidase(Fragment)OS=HomosapiensGN=LAP3PE=1SV=1	17016000	16941000	1	34736000	1	33873000	25422000	27235000	57739000	43586000	1.37386e+07	37571000	0.36567	0.02679
sp|O00560|SDCB1_HUMANSyntenin-1OS=HomosapiensGN=SDCBPPE=1SV=1;tr|B4DHN5|B4DHN5_HUMANSyntenin-1OS=HomosapiensGN=SDCBPPE=1SV=1;tr|E9PBU7|E9PBU7_HUMANSyntenin-1OS=HomosapiensGN=SDCBPPE=1SV=1	69964000	200430000	6678600	125680000	175790000	19679000	8239700	8554700	3978900	49295000	115708520	17949460	6.44635	0.0270983
sp|P63167|DYL1_HUMANDyneinlightchain1,cytoplasmicOS=HomosapiensGN=DYNLL1PE=1SV=1;tr|F8VXI7|F8VXI7_HUMANDyneinlightchain1,cytoplasmic(Fragment)OS=HomosapiensGN=DYNLL1PE=1SV=1;tr|F8VXL2|F8VXL2_HUMANDyneinlightchain1,cytoplasmicOS=HomosapiensGN=DYNLL1PE=1SV=1;tr|F8VRV5|F8VRV5_HUMANDyneinlightchain1,cytoplasmicOS=HomosapiensGN=DYNLL1PE=1SV=1;sp|Q96FJ2|DYL2_HUMANDyneinlightchain2,cytoplasmicOS=Homosap…	61177000	48676000	12193000	34155000	1	1	1	1	5065400	1	3.12402e+07	1.01308e+06	30.8368	0.0284695
tr|J3KTJ8|J3KTJ8_HUMAN60SribosomalproteinL26(Fragment)OS=HomosapiensGN=RPL26PE=4SV=8;tr|J3QRI7|J3QRI7_HUMAN60SribosomalproteinL26(Fragment)OS=HomosapiensGN=RPL26PE=4SV=1;tr|J3QQQ9|J3QQQ9_HUMANUncharacterizedproteinOS=HomosapiensPE=4SV=1;tr|J3QQV1|J3QQV1_HUMAN60SribosomalproteinL26OS=HomosapiensGN=RPL26PE=4SV=1;tr|E5RIT6|E5RIT6_HUMAN60SribosomalproteinL26-like1(Fragment)OS=HomosapiensGN=RPL26L1PE=…	1	1	6659600	1	1	28175000	1	22570000	26669000	6510800	1.33192e+06	1.6785e+07	0.079352	0.0295727
sp|Q96BM9|ARL8A_HUMANADP-ribosylationfactor-likeprotein8AOS=HomosapiensGN=ARL8APE=1SV=1;tr|A0A087X2J2|A0A087X2J2_HUMANADP-ribosylationfactor-likeprotein8AOS=HomosapiensGN=ARL8APE=1SV=1	1	23098000	4128000	15938000	20567000	1	3692200	1	1086200	1	1.27462e+07	955681	13.3373	0.033845
tr|H0Y362|H0Y362_HUMANZinctransporter7(Fragment)OS=HomosapiensGN=SLC30A7PE=1SV=2;sp|Q8NEW0|ZNT7_HUMANZinctransporter7OS=HomosapiensGN=SLC30A7PE=2SV=1	30310000	17859000	53300000	20288000	1	1	1	8642000	1	1	2.43514e+07	1.7284e+06	14.089	0.0346391
tr|F5GYN4|F5GYN4_HUMANUbiquitinthioesteraseOTUB1OS=HomosapiensGN=OTUB1PE=1SV=1;sp|Q96FW1|OTUB1_HUMANUbiquitinthioesteraseOTUB1OS=HomosapiensGN=OTUB1PE=1SV=2;tr|J3KR44|J3KR44_HUMANUbiquitinthioesteraseOS=HomosapiensGN=OTUB1PE=1SV=2;tr|F5H6Q1|F5H6Q1_HUMANUbiquitinthioesteraseOS=HomosapiensGN=OTUB1PE=1SV=1;tr|F5H3F0|F5H3F0_HUMANUbiquitinthioesteraseOTUB1OS=HomosapiensGN=OTUB1PE=1SV=1;tr|F5GYJ8|F5GYJ…	15563000	43678000	1	50982000	19701000	1	1	1	9296700	270320	2.59848e+07	1.9134e+06	13.5804	0.035984
sp|O75131|CPNE3_HUMANCopine-3OS=HomosapiensGN=CPNE3PE=1SV=1;tr|A0A087WYQ3|A0A087WYQ3_HUMANCopine-3(Fragment)OS=HomosapiensGN=CPNE3PE=1SV=1;tr|E5RFT7|E5RFT7_HUMANCopine-3(Fragment)OS=HomosapiensGN=CPNE3PE=1SV=1;tr|A0A087WUS8|A0A087WUS8_HUMANCopine-3(Fragment)OS=HomosapiensGN=CPNE3PE=1SV=1;tr|A0A087WXR6|A0A087WXR6_HUMANCopine-3(Fragment)OS=HomosapiensGN=CPNE3PE=1SV=1;tr|E5RHZ0|E5RHZ0_HUMANCopine-3(…	1	4186200	1	1	1	13272000	1	7795600	20756000	32411000	837241	1.48469e+07	0.0563915	0.0371712
sp|Q9BW30|TPPP3_HUMANTubulinpolymerization-promotingproteinfamilymember3OS=HomosapiensGN=TPPP3PE=1SV=1	1	8732200	1	7495000	7549000	86372000	27547000	31157000	229400000	274650000	4.75524e+06	129825200	0.036628	0.0413036
sp|Q9BV40|VAMP8_HUMANVesicle-associatedmembraneprotein8OS=HomosapiensGN=VAMP8PE=1SV=1;tr|C9JXZ5|C9JXZ5_HUMANVesicle-associatedmembraneprotein8OS=HomosapiensGN=VAMP8PE=1SV=1;tr|B8ZZT4|B8ZZT4_HUMANVesicle-associatedmembraneprotein8OS=HomosapiensGN=VAMP8PE=1SV=1	89370000	56067000	5988400	84140000	1	1	1	1	5906300	1	4.71131e+07	1.18126e+06	39.8837	0.0415293
sp|P27797|CALR_HUMANCalreticulinOS=HomosapiensGN=CALRPE=1SV=1;tr|K7EJB9|K7EJB9_HUMANCalreticulin(Fragment)OS=HomosapiensGN=CALRPE=1SV=1;tr|K7EL50|K7EL50_HUMANCalreticulin(Fragment)OS=HomosapiensGN=CALRPE=1SV=1	222980000	56278000	12693000	359120000	112220000	1	1	2593300	4169300	1	152658200	1.35252e+06	112.869	0.041768
sp|P26641|EF1G_HUMANElongationfactor1-gammaOS=HomosapiensGN=EEF1GPE=1SV=3	1	8744600	4039400	21327000	1	39251000	19144000	1572900	60766000	47381000	6.8222e+06	33622980	0.202903	0.0436775
sp|P49368|TCPG_HUMANT-complexprotein1subunitgammaOS=HomosapiensGN=CCT3PE=1SV=4;tr|B4DUR8|B4DUR8_HUMANT-complexprotein1subunitgammaOS=HomosapiensGN=CCT3PE=1SV=1;tr|E9PRC8|E9PRC8_HUMANT-complexprotein1subunitgamma(Fragment)OS=HomosapiensGN=CCT3PE=1SV=1;tr|E9PM09|E9PM09_HUMANT-complexprotein1subunitgamma(Fragment)OS=HomosapiensGN=CCT3PE=1SV=1;tr|Q5SZX9|Q5SZX9_HUMANT-complexprotein1subunitgamma(Fragm…	35423000	14046000	11903000	27592000	1	34149000	38225000	46764000	45073000	19351000	1.77928e+07	36712400	0.484654	0.0438599
sp|Q01518|CAP1_HUMANAdenylylcyclase-associatedprotein1OS=HomosapiensGN=CAP1PE=1SV=5;tr|Q5T0R7|Q5T0R7_HUMANAdenylylcyclase-associatedprotein1(Fragment)OS=HomosapiensGN=CAP1PE=1SV=1;tr|Q5T0R6|Q5T0R6_HUMANAdenylylcyclase-associatedprotein1(Fragment)OS=HomosapiensGN=CAP1PE=1SV=1;tr|Q5T0R5|Q5T0R5_HUMANAdenylylcyclase-associatedprotein1(Fragment)OS=HomosapiensGN=CAP1PE=1SV=8;tr|Q5T0R4|Q5T0R4_HUMANAdeny…	12825000	52975000	28909000	133300000	1	224920000	41716000	214410000	170730000	88252000	4.56018e+07	148005600	0.308109	0.0442363
sp|Q15365|PCBP1_HUMANPoly(rC)-bindingprotein1OS=HomosapiensGN=PCBP1PE=1SV=2	24934000	36458000	9923200	58022000	7121900	50109000	42158000	69378000	105160000	46264000	27291820	62613800	0.435875	0.0452091
tr|H0YGX7|H0YGX7_HUMANRhoGDP-dissociationinhibitor2(Fragment)OS=HomosapiensGN=ARHGDIBPE=1SV=1;sp|P52566|GDIR2_HUMANRhoGDP-dissociationinhibitor2OS=HomosapiensGN=ARHGDIBPE=1SV=3;tr|F5H2R5|F5H2R5_HUMANRhoGDP-dissociationinhibitor2(Fragment)OS=HomosapiensGN=ARHGDIBPE=1SV=1;tr|F5H6Q0|F5H6Q0_HUMANRhoGDP-dissociationinhibitor2(Fragment)OS=HomosapiensGN=ARHGDIBPE=1SV=1;tr|F5H3P3|F5H3P3_HUMANRhoGDP-disso…	132230000	88652000	7262500	67855000	7444200	1	1	11465000	3209700	4524300	60688740	3.8398e+06	15.8052	0.0468654
sp|P09525|ANXA4_HUMANAnnexinA4OS=HomosapiensGN=ANXA4PE=1SV=4	33201000	26867000	21673000	33640000	1	94005000	27558000	131980000	443170000	386440000	2.30762e+07	216630600	0.106523	0.0487049
sp|Q9HCY8|S10AE_HUMANProteinS100-A14OS=HomosapiensGN=S100A14PE=1SV=1	9494100	7861000	1	8001300	1	1	1	1	1126800	1	5.07128e+06	225361	22.5029	0.0500609
sp|P50995|ANX11_HUMANAnnexinA11OS=HomosapiensGN=ANXA11PE=1SV=1;tr|H0Y6E1|H0Y6E1_HUMANAnnexinA11(Fragment)OS=HomosapiensGN=ANXA11PE=1SV=1;tr|E5RIN3|E5RIN3_HUMANAnnexinA13(Fragment)OS=HomosapiensGN=ANXA13PE=1SV=1;sp|P27216|ANX13_HUMANAnnexinA13OS=HomosapiensGN=ANXA13PE=1SV=3	93681000	32842000	11481000	66473000	1	123630000	32020000	259740000	87004000	227890000	4.08954e+07	146056800	0.279997	0.0523126
sp|O00231|PSD11_HUMAN26Sproteasomenon-ATPaseregulatorysubunit11OS=HomosapiensGN=PSMD11PE=1SV=3;tr|J3QRY4|J3QRY4_HUMAN26Sproteasomenon-ATPaseregulatorysubunit11(Fragment)OS=HomosapiensGN=PSMD11PE=1SV=8;tr|J3QS13|J3QS13_HUMAN26Sproteasomenon-ATPaseregulatorysubunit11(Fragment)OS=HomosapiensGN=PSMD11PE=1SV=1	3618800	2515500	1	12707000	1	3508700	6259200	24746000	17383000	19951000	3.76826e+06	14369580	0.262239	0.0540349
sp|Q02413|DSG1_HUMANDesmoglein-1OS=HomosapiensGN=DSG1PE=1SV=2	5480500	7059100	1	8909000	1	1	1	1	886700	1	4.28972e+06	177341	24.1891	0.0560699
sp|P61088|UBE2N_HUMANUbiquitin-conjugatingenzymeE2NOS=HomosapiensGN=UBE2NPE=1SV=1;sp|Q5JXB2|UE2NL_HUMANPutativeubiquitin-conjugatingenzymeE2N-likeOS=HomosapiensGN=UBE2NLPE=1SV=1;tr|F8VZ29|F8VZ29_HUMANUbiquitin-conjugatingenzymeE2NOS=HomosapiensGN=UBE2NPE=1SV=1;tr|F8VQQ8|F8VQQ8_HUMANUbiquitin-conjugatingenzymeE2NOS=HomosapiensGN=UBE2NPE=1SV=1;tr|F8VSD4|F8VSD4_HUMANUbiquitin-conjugatingenzymeE2NOS=…	6027500	11295000	1	17553000	1	15993000	1	33348000	49331000	39064000	6.9751e+06	2.75472e+07	0.253205	0.0597534
sp|O14879|IFIT3_HUMANInterferon-inducedproteinwithtetratricopeptiderepeats3OS=HomosapiensGN=IFIT3PE=1SV=1	24999000	19692000	1	13588000	1	1	1	2389800	1	1	1.16558e+07	477961	24.3865	0.0602382
sp|P31949|S10AB_HUMANProteinS100-A11OS=HomosapiensGN=S100A11PE=1SV=2	1	27207000	1	1	33041000	324460000	89434000	44266000	95609000	66649000	1.20496e+07	124083600	0.0971087	0.0610885
tr|H3BRG4|H3BRG4_HUMANCytochromeb-c1complexsubunit2,mitochondrialOS=HomosapiensGN=UQCRC2PE=1SV=1;sp|P22695|QCR2_HUMANCytochromeb-c1complexsubunit2,mitochondrialOS=HomosapiensGN=UQCRC2PE=1SV=3	5511100	4336500	1	11707000	6243600	1	1	3607800	2334800	1	5.55964e+06	1.18852e+06	4.67778	0.0630035
sp|P23526|SAHH_HUMANAdenosylhomocysteinaseOS=HomosapiensGN=AHCYPE=1SV=4	14426000	6897100	1	13918000	1	22447000	31242000	24108000	13166000	4678800	7.04822e+06	19128360	0.36847	0.0631842
sp|P07988|PSPB_HUMANPulmonarysurfactant-associatedproteinBOS=HomosapiensGN=SFTPBPE=1SV=3;tr|D6W5L6|D6W5L6_HUMANPulmonarysurfactant-associatedproteinBOS=HomosapiensGN=SFTPBPE=1SV=1;tr|H0Y7V6|H0Y7V6_HUMANPulmonarysurfactant-associatedproteinB(Fragment)OS=HomosapiensGN=SFTPBPE=1SV=1;tr|U3KQT2|U3KQT2_HUMANPulmonarysurfactant-associatedproteinB(Fragment)OS=HomosapiensGN=SFTPBPE=1SV=1	86241000	174600000	81007000	216900000	1	2239700000	466120000	811790000	711970000	4546500000	1.1175e+08	1755216000	0.0636671	0.0638578
sp|O75874|IDHC_HUMANIsocitratedehydrogenase[NADP]cytoplasmicOS=HomosapiensGN=IDH1PE=1SV=2;tr|C9J4N6|C9J4N6_HUMANIsocitratedehydrogenase[NADP]cytoplasmic(Fragment)OS=HomosapiensGN=IDH1PE=1SV=1;tr|C9JJE5|C9JJE5_HUMANIsocitratedehydrogenase[NADP]cytoplasmic(Fragment)OS=HomosapiensGN=IDH1PE=1SV=1;tr|C9JLU6|C9JLU6_HUMANIsocitratedehydrogenase[NADP]cytoplasmic(Fragment)OS=HomosapiensGN=IDH1PE=1SV=8	27480000	27721000	7844000	34228000	25517000	88142000	1	49099000	110930000	92067000	24558000	6.80476e+07	0.360894	0.0640136
tr|G3V2H3|G3V2H3_HUMANPurinenucleosidephosphorylase(Fragment)OS=HomosapiensGN=PNPPE=1SV=1;sp|P00491|PNPH_HUMANPurinenucleosidephosphorylaseOS=HomosapiensGN=PNPPE=1SV=2;tr|G3V5M2|G3V5M2_HUMANPurinenucleosidephosphorylase(Fragment)OS=HomosapiensGN=PNPPE=1SV=1	1	1	1047300	1	1	6188800	1	862960	2215400	6706800	209461	3.19479e+06	0.0655632	0.0643821
tr|B1AVQ7|B1AVQ7_HUMANMucin-1OS=HomosapiensGN=MUC1PE=1SV=1;tr|A0A0A0MRB3|A0A0A0MRB3_HUMANMucin-1OS=HomosapiensGN=MUC1PE=1SV=1;tr|A0A0C4DGW3|A0A0C4DGW3_HUMANMucin-1OS=HomosapiensGN=MUC1PE=1SV=1;tr|A0A087X2A4|A0A087X2A4_HUMANMucin-1OS=HomosapiensGN=MUC1PE=1SV=1;sp|P15941|MUC1_HUMANMucin-1OS=HomosapiensGN=MUC1PE=1SV=3;tr|A0A087WWM1|A0A087WWM1_HUMANMucin-1OS=HomosapiensGN=MUC1PE=1SV=1;tr|A0A087WVJ0|A…	270310000	223320000	43629000	333720000	1	38675000	32739000	63474000	6720500	29949000	1.74196e+08	34311500	5.07689	0.0656455
sp|P55327|TPD52_HUMANTumorproteinD52OS=HomosapiensGN=TPD52PE=1SV=2;tr|H0YC42|H0YC42_HUMANUncharacterizedproteinOS=HomosapiensPE=4SV=2	5066100	3717400	1	2626400	1	1	1	1	611310	1	2.28198e+06	122263	18.6646	0.0662293
sp|O75923|DYSF_HUMANDysferlinOS=HomosapiensGN=DYSFPE=1SV=1	16858000	4360400	1	2422000	20651000	1	1	1	1	383770	8.85828e+06	76754.8	115.41	0.0668721
sp|O75396|SC22B_HUMANVesicle-traffickingproteinSEC22bOS=HomosapiensGN=SEC22BPE=1SV=4	1	1	1	1372900	1	6981500	1	4249000	6584500	1	274581	3.563e+06	0.0770645	0.06697
tr|J3QS39|J3QS39_HUMANPolyubiquitin-B(Fragment)OS=HomosapiensGN=UBBPE=1SV=1;tr|J3QTR3|J3QTR3_HUMANUbiquitin-40SribosomalproteinS27a(Fragment)OS=HomosapiensGN=RPS27APE=1SV=1;tr|F5H6Q2|F5H6Q2_HUMANPolyubiquitin-C(Fragment)OS=HomosapiensGN=UBCPE=1SV=8;sp|P62987|RL40_HUMANUbiquitin-60SribosomalproteinL40OS=HomosapiensGN=UBA52PE=1SV=2;tr|F5GYU3|F5GYU3_HUMANPolyubiquitin-C(Fragment)OS=HomosapiensGN=UBC…	19481000	15564000	20036000	21344000	1	293480000	92823000	81198000	19517000	81578000	1.5285e+07	113719200	0.13441	0.0691517
tr|Q5TEC6|Q5TEC6_HUMANHistoneH3OS=HomosapiensGN=HIST2H3PS2PE=1SV=1	465360000	108300000	25914000	277910000	22830000	1	1	18645000	1	1	180062800	3.729e+06	48.2871	0.0720286
sp|Q00610|CLH1_HUMANClathrinheavychain1OS=HomosapiensGN=CLTCPE=1SV=5;tr|A0A087WVQ6|A0A087WVQ6_HUMANClathrinheavychainOS=HomosapiensGN=CLTCPE=1SV=1;tr|J3KS13|J3KS13_HUMANClathrinheavychain1OS=HomosapiensGN=CLTCPE=1SV=1;tr|A0A087WX41|A0A087WX41_HUMANClathrinheavychain2OS=HomosapiensGN=CLTCL1PE=1SV=1;sp|P53675|CLH2_HUMANClathrinheavychain2OS=HomosapiensGN=CLTCL1PE=1SV=2;tr|K7EJJ5|K7EJJ5_HUMANClathri…	436590000	76839000	209140000	343050000	35263000	38404000	25990000	134060000	75811000	1	220176400	5.4853e+07	4.01394	0.0722708
sp|P26038|MOES_HUMANMoesinOS=HomosapiensGN=MSNPE=1SV=3	1	37911000	54930000	62298000	106650000	135430000	22007000	110100000	178660000	140450000	5.23578e+07	117329400	0.446246	0.0725958
sp|P61081|UBC12_HUMANNEDD8-conjugatingenzymeUbc12OS=HomosapiensGN=UBE2MPE=1SV=1	9364900	7424300	1	6685100	1	1	1	1852700	1092600	1	4.69486e+06	589061	7.97008	0.0744615
sp|Q92930|RAB8B_HUMANRas-relatedproteinRab-8BOS=HomosapiensGN=RAB8BPE=1SV=2;tr|H0YNE9|H0YNE9_HUMANRas-relatedproteinRab-8B(Fragment)OS=HomosapiensGN=RAB8BPE=1SV=1	4735400	3169300	1797200	3884100	7629800	2239300	1	1	3823400	2572600	4243160	1.72706e+06	2.45687	0.0752378
sp|Q5T447|HECD3_HUMANE3ubiquitin-proteinligaseHECTD3OS=HomosapiensGN=HECTD3PE=1SV=1	738140	1	1	1	1	1883100	1	1223600	283530	1098500	147629	897746	0.164444	0.0771077
sp|O60635|TSN1_HUMANTetraspanin-1OS=HomosapiensGN=TSPAN1PE=1SV=2	18362000	4400400	23881000	8748100	1	1	4936900	2408500	2443600	1	1.10783e+07	1.9578e+06	5.65854	0.0777504
tr|H7C5W9|H7C5W9_HUMANSarcoplasmic/endoplasmicreticulumcalciumATPase2(Fragment)OS=HomosapiensGN=ATP2A2PE=1SV=1;sp|P16615|AT2A2_HUMANSarcoplasmic/endoplasmicreticulumcalciumATPase2OS=HomosapiensGN=ATP2A2PE=1SV=1;sp|O14983|AT2A1_HUMANSarcoplasmic/endoplasmicreticulumcalciumATPase1OS=HomosapiensGN=ATP2A1PE=1SV=1	15183000	5951500	2327000	9067100	1	1	1	1	4324300	1	6.50572e+06	864861	7.52227	0.0788011
sp|P51148|RAB5C_HUMANRas-relatedproteinRab-5COS=HomosapiensGN=RAB5CPE=1SV=2;tr|K7EIP6|K7EIP6_HUMANUncharacterizedprotein(Fragment)OS=HomosapiensPE=4SV=1;tr|K7ENY4|K7ENY4_HUMANRas-relatedproteinRab-5C(Fragment)OS=HomosapiensGN=RAB5CPE=1SV=1;tr|K7ERI8|K7ERI8_HUMANUncharacterizedproteinOS=HomosapiensPE=4SV=1;tr|K7ERQ8|K7ERQ8_HUMANUncharacterizedprotein(Fragment)OS=HomosapiensPE=4SV=1	4612800	1	1892000	2292900	1	12246000	7808900	47115000	12617000	5950600	1.75954e+06	17147500	0.102612	0.0790276
tr|A0A087WXI2|A0A087WXI2_HUMANIgGFc-bindingproteinOS=HomosapiensGN=FCGBPPE=1SV=1;sp|Q9Y6R7|FCGBP_HUMANIgGFc-bindingproteinOS=HomosapiensGN=FCGBPPE=1SV=3;tr|A0A087WUZ2|A0A087WUZ2_HUMANIgGFc-bindingproteinOS=HomosapiensGN=FCGBPPE=1SV=1	401210000	164910000	167800000	420090000	74295000	806530000	403640000	325890000	316870000	1115400000	245661000	593666000	0.413803	0.0790703
sp|P01876|IGHA1_HUMANImmunoglobulinheavyconstantalpha1OS=HomosapiensGN=IGHA1PE=1SV=2	603080000	643770000	2111400000	886700000	2340900000	1225700000	5452400000	3045900000	3220800000	10944000000	1317170000	4777760000	0.275688	0.0794067
sp|P12273|PIP_HUMANProlactin-inducibleproteinOS=HomosapiensGN=PIPPE=1SV=1	23611000	1	1	7589200	1	5038700	4170500	152820000	60550000	179940000	6.24004e+06	80503840	0.0775123	0.0799821
sp|P49411|EFTU_HUMANElongationfactorTu,mitochondrialOS=HomosapiensGN=TUFMPE=1SV=2;tr|H3BNU3|H3BNU3_HUMANElongationfactorTu,mitochondrialOS=HomosapiensGN=TUFMPE=1SV=1	12078000	18556000	4224100	39690000	1	1	1	1	4754300	1	1.49096e+07	950861	15.6801	0.0825271
sp|Q99832|TCPH_HUMANT-complexprotein1subunitetaOS=HomosapiensGN=CCT7PE=1SV=2;tr|F8WAM2|F8WAM2_HUMANT-complexprotein1subuniteta(Fragment)OS=HomosapiensGN=CCT7PE=1SV=1;tr|F8WBP8|F8WBP8_HUMANT-complexprotein1subunitetaOS=HomosapiensGN=CCT7PE=1SV=1	8467300	12961000	5490400	25422000	2738900	49791000	10660000	55786000	95985000	8377200	11015920	44119840	0.249682	0.0826301
tr|Q5T0I0|Q5T0I0_HUMANGelsolin(Fragment)OS=HomosapiensGN=GSNPE=1SV=1	13797000	17422000	8911500	27084000	95440000	1	1	4406200	1	1	32530900	881241	36.9149	0.0837875
sp|P10909|CLUS_HUMANClusterinOS=HomosapiensGN=CLUPE=1SV=1;tr|E7ERK6|E7ERK6_HUMANClusterin(Fragment)OS=HomosapiensGN=CLUPE=1SV=1;tr|E7ETB4|E7ETB4_HUMANClusterin(Fragment)OS=HomosapiensGN=CLUPE=1SV=1;tr|H0YLK8|H0YLK8_HUMANClusterin(Fragment)OS=HomosapiensGN=CLUPE=1SV=1;tr|E5RJZ5|E5RJZ5_HUMANClusterin(Fragment)OS=HomosapiensGN=CLUPE=1SV=1;tr|H0YC35|H0YC35_HUMANClusterin(Fragment)OS=HomosapiensGN=CLU…	474270000	128390000	417520000	178350000	1	37853000	67902000	33435000	74869000	94165000	2.39706e+08	61644800	3.8885	0.0839443
tr|M0R0Y2|M0R0Y2_HUMANAlpha-solubleNSFattachmentproteinOS=HomosapiensGN=NAPAPE=1SV=1;sp|P54920|SNAA_HUMANAlpha-solubleNSFattachmentproteinOS=HomosapiensGN=NAPAPE=1SV=3;tr|M0R213|M0R213_HUMANAlpha-solubleNSFattachmentprotein(Fragment)OS=HomosapiensGN=NAPAPE=1SV=1;tr|M0R027|M0R027_HUMANAlpha-solubleNSFattachmentprotein(Fragment)OS=HomosapiensGN=NAPAPE=1SV=1;tr|M0R058|M0R058_HUMANAlpha-solubleNSFatt…	3247300	5468400	4234300	8630600	1	1	1	1	4780700	1	4.31612e+06	956141	4.51411	0.0839569
sp|P31939|PUR9_HUMANBifunctionalpurinebiosynthesisproteinPURHOS=HomosapiensGN=ATICPE=1SV=3;tr|H7C1S2|H7C1S2_HUMANBifunctionalpurinebiosynthesisproteinPURH(Fragment)OS=HomosapiensGN=ATICPE=1SV=1;tr|C9JLK0|C9JLK0_HUMANBifunctionalpurinebiosynthesisproteinPURH(Fragment)OS=HomosapiensGN=ATICPE=1SV=1	1055400	1	1	1	1	10726000	1	13038000	27700000	1	211081	1.02928e+07	0.0205076	0.0842719
sp|Q9HC84|MUC5B_HUMANMucin-5BOS=HomosapiensGN=MUC5BPE=1SV=3	4336100000	2979100000	38945000	1445900000	503260000	63451000	374300000	384610000	164200000	462610000	1860661000	289834200	6.41974	0.0854431
sp|Q8TE73|DYH5_HUMANDyneinheavychain5,axonemalOS=HomosapiensGN=DNAH5PE=1SV=3	55122000	19795000	1	58740000	1	1	7678200	1	1	1	2.67314e+07	1.53564e+06	17.4073	0.0876199
sp|Q9H1X1|RSPH9_HUMANRadialspokeheadprotein9homologOS=HomosapiensGN=RSPH9PE=1SV=1	6812800	10226000	1	7434500	1	1	1	1	3300800	1	4.89466e+06	660161	7.41435	0.0882053
sp|Q9HB40|RISC_HUMANRetinoid-inducibleserinecarboxypeptidaseOS=HomosapiensGN=SCPEP1PE=1SV=1;tr|I3L4Z9|I3L4Z9_HUMANRetinoid-inducibleserinecarboxypeptidase(Fragment)OS=HomosapiensGN=SCPEP1PE=1SV=1	5693500	4830400	1	4288700	1	1	1	1	2165200	1	2.96252e+06	433041	6.8412	0.0883802
sp|Q16777|H2A2C_HUMANHistoneH2Atype2-COS=HomosapiensGN=HIST2H2ACPE=1SV=4;sp|Q6FI13|H2A2A_HUMANHistoneH2Atype2-AOS=HomosapiensGN=HIST2H2AA3PE=1SV=3	131990000	54029000	42918000	96910000	1	416640000	210010000	773340000	54418000	131860000	6.51694e+07	317253600	0.205417	0.0904988
tr|M0R0F0|M0R0F0_HUMAN40SribosomalproteinS5(Fragment)OS=HomosapiensGN=RPS5PE=1SV=1;sp|P46782|RS5_HUMAN40SribosomalproteinS5OS=HomosapiensGN=RPS5PE=1SV=4;tr|M0R0R2|M0R0R2_HUMAN40SribosomalproteinS5OS=HomosapiensGN=RPS5PE=1SV=1;tr|M0QZN2|M0QZN2_HUMAN40SribosomalproteinS5OS=HomosapiensGN=RPS5PE=1SV=1	1	1	1	6624100	1	9415300	1	18420000	6638400	4336500	1.32482e+06	7.76204e+06	0.170679	0.0910316
sp|P25789|PSA4_HUMANProteasomesubunitalphatype-4OS=HomosapiensGN=PSMA4PE=1SV=1;tr|H0YLS6|H0YLS6_HUMANProteasomesubunitalphatypeOS=HomosapiensGN=PSMA4PE=1SV=1;tr|H0YLC2|H0YLC2_HUMANProteasomesubunitalphatypeOS=HomosapiensGN=PSMA4PE=1SV=1;tr|H0YMI6|H0YMI6_HUMANProteasomesubunitalphatype(Fragment)OS=HomosapiensGN=PSMA4PE=1SV=1;tr|H0YMA1|H0YMA1_HUMANProteasomesubunitalphatype(Fragment)OS=HomosapiensG…	19140000	10410000	2610600	15458000	11917000	16713000	1	1	1643300	1	11907120	3.67126e+06	3.24333	0.0911984
sp|P62826|RAN_HUMANGTP-bindingnuclearproteinRanOS=HomosapiensGN=RANPE=1SV=3;tr|B5MDF5|B5MDF5_HUMANGTP-bindingnuclearproteinRanOS=HomosapiensGN=RANPE=1SV=1;tr|J3KQE5|J3KQE5_HUMANGTP-bindingnuclearproteinRan(Fragment)OS=HomosapiensGN=RANPE=1SV=1;tr|H0YFC6|H0YFC6_HUMANGTP-bindingnuclearproteinRan(Fragment)OS=HomosapiensGN=RANPE=1SV=1;tr|F5H018|F5H018_HUMANGTP-bindingnuclearproteinRan(Fragment)OS=Hom…	30702000	79918000	1	70520000	96121000	148230000	110020000	66788000	79365000	89747000	5.54522e+07	98830000	0.561087	0.091277
sp|P60981|DEST_HUMANDestrinOS=HomosapiensGN=DSTNPE=1SV=3;tr|F6RFD5|F6RFD5_HUMANDestrinOS=HomosapiensGN=DSTNPE=1SV=1	21021000	18100000	5707400	16031000	1055600	71915000	65460000	16574000	200270000	24851000	12383000	75814000	0.163334	0.0922458
sp|P61626|LYSC_HUMANLysozymeCOS=HomosapiensGN=LYZPE=1SV=1;tr|F8VV32|F8VV32_HUMANLysozymeCOS=HomosapiensGN=LYZPE=1SV=1;tr|A0A0B4J259|A0A0B4J259_HUMANLysozymeCOS=HomosapiensGN=LYZPE=1SV=1	1	1	1	1	2519900	35735000	361370000	168110000	53846000	4364200	503981	124685040	0.00404203	0.0937803
tr|B4DDN1|B4DDN1_HUMANGlutamine--tRNAligaseOS=HomosapiensGN=QARSPE=1SV=1;tr|A0A1B0GVU9|A0A1B0GVU9_HUMANGlutamine--tRNAligase(Fragment)OS=HomosapiensGN=QARSPE=1SV=1;sp|P47897|SYQ_HUMANGlutamine--tRNAligaseOS=HomosapiensGN=QARSPE=1SV=1;tr|A0A1B0GTT3|A0A1B0GTT3_HUMANGlutamine--tRNAligase(Fragment)OS=HomosapiensGN=QARSPE=1SV=1;tr|A0A0U1RQQ5|A0A0U1RQQ5_HUMANGlutamine--tRNAligase(Fragment)OS=Homosapien…	1	1	1	3550200	1	6112300	1	13645000	10627000	1	710041	6.07686e+06	0.116843	0.0959906
sp|Q9NY33|DPP3_HUMANDipeptidylpeptidase3OS=HomosapiensGN=DPP3PE=1SV=2;tr|E9PQ14|E9PQ14_HUMANDipeptidylpeptidase3(Fragment)OS=HomosapiensGN=DPP3PE=1SV=1;tr|G3V1D3|G3V1D3_HUMANDipeptidylpeptidase3OS=HomosapiensGN=DPP3PE=1SV=1;tr|G3V180|G3V180_HUMANDipeptidylpeptidase3OS=HomosapiensGN=DPP3PE=1SV=1;tr|E9PKK8|E9PKK8_HUMANDipeptidylpeptidase3(Fragment)OS=HomosapiensGN=DPP3PE=1SV=1;tr|E9PPK9|E9PPK9_HUMA…	1	1	1	12309000	1	13560000	1	6054700	12321000	15903000	2.4618e+06	9.56774e+06	0.257302	0.0983831
sp|P78371|TCPB_HUMANT-complexprotein1subunitbetaOS=HomosapiensGN=CCT2PE=1SV=4;tr|F5GWF6|F5GWF6_HUMANT-complexprotein1subunitbetaOS=HomosapiensGN=CCT2PE=1SV=2;tr|F8VQ14|F8VQ14_HUMANT-complexprotein1subunitbetaOS=HomosapiensGN=CCT2PE=1SV=1	14302000	21797000	16965000	35135000	1	30247000	62835000	26559000	30472000	23461000	1.76398e+07	34714800	0.508135	0.0984483
tr|H0YK13|H0YK13_HUMANGMPreductase2(Fragment)OS=HomosapiensGN=GMPR2PE=1SV=1;tr|H0YMB3|H0YMB3_HUMANGMPreductaseOS=HomosapiensGN=GMPR2PE=1SV=1;tr|H0YLV5|H0YLV5_HUMANGMPreductaseOS=HomosapiensGN=GMPR2PE=1SV=1;tr|A0A087WWM4|A0A087WWM4_HUMANGMPreductaseOS=HomosapiensGN=GMPR2PE=1SV=1;sp|Q9P2T1|GMPR2_HUMANGMPreductase2OS=HomosapiensGN=GMPR2PE=1SV=1;tr|F8WAN9|F8WAN9_HUMANGMPreductaseOS=HomosapiensGN=GMPR…	58748000	53240000	1	45585000	1	12083000	1	8127400	12752000	1	3.15146e+07	6.59248e+06	4.78039	0.0985253
sp|P69905|HBA_HUMANHemoglobinsubunitalphaOS=HomosapiensGN=HBA1PE=1SV=2	269190000	142050000	681540000	1765100000	350800000	29150000	55900000	12961000	273220000	53185000	641736000	84883200	7.56022	0.0991053
sp|A8MYP8|ODF3B_HUMANOuterdensefiberprotein3BOS=HomosapiensGN=ODF3BPE=2SV=1;tr|B5MCN9|B5MCN9_HUMANOuterdensefiberprotein3BOS=HomosapiensGN=ODF3BPE=1SV=1;tr|C9JUR5|C9JUR5_HUMANOuterdensefiberprotein3B(Fragment)OS=HomosapiensGN=ODF3BPE=1SV=1;tr|B5MC17|B5MC17_HUMANOuterdensefiberprotein3BOS=HomosapiensGN=ODF3BPE=1SV=1;tr|B5MD02|B5MD02_HUMANOuterdensefiberprotein3BOS=HomosapiensGN=ODF3BPE=1SV=1	188710000	1	32009000	141470000	1	1	1	1	1564200	1	7.24378e+07	312841	231.548	0.101556
sp|Q96QR1|SG3A1_HUMANSecretoglobinfamily3Amember1OS=HomosapiensGN=SCGB3A1PE=1SV=2	1	104300000	5094500	35136000	1	358260000	990980000	23819000	95106000	267880000	2.89061e+07	347209000	0.0832527	0.102666
sp|P84077|ARF1_HUMANADP-ribosylationfactor1OS=HomosapiensGN=ARF1PE=1SV=2;sp|P61204|ARF3_HUMANADP-ribosylationfactor3OS=HomosapiensGN=ARF3PE=1SV=2;tr|F5H423|F5H423_HUMANUncharacterizedproteinOS=HomosapiensPE=3SV=1;tr|H0YGG7|H0YGG7_HUMANUncharacterizedprotein(Fragment)OS=HomosapiensPE=4SV=1	56966000	38497000	9128700	37593000	21413000	23161000	15065000	29079000	6980900	1	32719540	1.48572e+07	2.20227	0.102936
sp|P14550|AK1A1_HUMANAlcoholdehydrogenase[NADP(+)]OS=HomosapiensGN=AKR1A1PE=1SV=3;tr|Q5T621|Q5T621_HUMANAlcoholdehydrogenase[NADP(+)](Fragment)OS=HomosapiensGN=AKR1A1PE=1SV=1;tr|V9GYG2|V9GYG2_HUMANAlcoholdehydrogenase[NADP(+)]OS=HomosapiensGN=AKR1A1PE=1SV=1;tr|V9GYP9|V9GYP9_HUMANAlcoholdehydrogenase[NADP(+)](Fragment)OS=HomosapiensGN=AKR1A1PE=1SV=1	5515800	1	1	72995000	1	86765000	48226000	8305500	83099000	246030000	1.57022e+07	94485100	0.166187	0.103768
sp|P46940|IQGA1_HUMANRasGTPase-activating-likeproteinIQGAP1OS=HomosapiensGN=IQGAP1PE=1SV=1;tr|A0A0J9YXZ5|A0A0J9YXZ5_HUMANRasGTPase-activating-likeproteinIQGAP1OS=HomosapiensGN=IQGAP1PE=1SV=1;tr|H0YLE8|H0YLE8_HUMANRasGTPase-activating-likeproteinIQGAP1OS=HomosapiensGN=IQGAP1PE=1SV=1;tr|A0A087X225|A0A087X225_HUMANRasGTPase-activating-likeproteinIQGAP1(Fragment)OS=HomosapiensGN=IQGAP1PE=1SV=1;tr|H0Y…	645200000	194040000	33839000	340080000	17363000	68991000	4139700	9453900	58913000	19697000	246104400	32238920	7.63377	0.10387
sp|P16402|H13_HUMANHistoneH1.3OS=HomosapiensGN=HIST1H1DPE=1SV=2	18955000	4702600	1	3271300	1	127060000	1	11151000	92549000	25521000	5.38578e+06	5.12562e+07	0.105076	0.104992
sp|P07237|PDIA1_HUMANProteindisulfide-isomeraseOS=HomosapiensGN=P4HBPE=1SV=3;tr|H7BZ94|H7BZ94_HUMANProteindisulfide-isomeraseOS=HomosapiensGN=P4HBPE=1SV=2;tr|H0Y3Z3|H0Y3Z3_HUMANProteindisulfide-isomerase(Fragment)OS=HomosapiensGN=P4HBPE=1SV=1;tr|I3L0S0|I3L0S0_HUMANProteindisulfide-isomerase(Fragment)OS=HomosapiensGN=P4HBPE=1SV=1;tr|I3L398|I3L398_HUMANProteindisulfide-isomerase(Fragment)OS=Homosap…	148280000	56845000	6296000	41507000	114960000	20385000	1	71756000	13046000	1	73577600	2.10374e+07	3.49747	0.106097
sp|P01834|IGKC_HUMANImmunoglobulinkappaconstantOS=HomosapiensGN=IGKCPE=1SV=2	472730000	340060000	1860100000	430980000	100260000	447410000	1790900000	1158700000	2031900000	4301800000	640826000	1946142000	0.32928	0.1077
sp|P60174|TPIS_HUMANTriosephosphateisomeraseOS=HomosapiensGN=TPI1PE=1SV=3;tr|U3KPZ0|U3KPZ0_HUMANTriosephosphateisomerase(Fragment)OS=HomosapiensGN=TPI1PE=1SV=1;tr|U3KQF3|U3KQF3_HUMANTriosephosphateisomerase(Fragment)OS=HomosapiensGN=TPI1PE=1SV=1;tr|U3KPS5|U3KPS5_HUMANTriosephosphateisomerase(Fragment)OS=HomosapiensGN=TPI1PE=1SV=8	88493000	5438500	1	32099000	1	118360000	21300000	124250000	91745000	23595000	2.52061e+07	75850000	0.332315	0.109464
sp|P61981|1433G_HUMAN14-3-3proteingammaOS=HomosapiensGN=YWHAGPE=1SV=2	27679000	6130700	4478900	25761000	1	64323000	25350000	11172000	36648000	22929000	1.28099e+07	32084400	0.399257	0.109576
sp|O00182|LEG9_HUMANGalectin-9OS=HomosapiensGN=LGALS9PE=1SV=2;tr|J3QS92|J3QS92_HUMANGalectin(Fragment)OS=HomosapiensGN=LGALS9PE=1SV=1;tr|J3KSY2|J3KSY2_HUMANGalectinOS=HomosapiensGN=LGALS9CPE=4SV=1;sp|Q6DKI2|LEG9C_HUMANGalectin-9COS=HomosapiensGN=LGALS9CPE=1SV=2;sp|Q3B8N2|LEG9B_HUMANGalectin-9BOS=HomosapiensGN=LGALS9BPE=1SV=3	7858800	11851000	1	23459000	1	1	1	1	3701800	1	8.63376e+06	740361	11.6616	0.111971
sp|P01911|2B1F_HUMANHLAclassIIhistocompatibilityantigen,DRB1-15betachainOS=HomosapiensGN=HLA-DRB1PE=1SV=2;sp|Q5Y7A7|2B1D_HUMANHLAclassIIhistocompatibilityantigen,DRB1-13betachainOS=HomosapiensGN=HLA-DRB1PE=1SV=1;sp|Q30167|2B1A_HUMANHLAclassIIhistocompatibilityantigen,DRB1-10betachainOS=HomosapiensGN=HLA-DRB1PE=1SV=2;sp|P01912|2B13_HUMANHLAclassIIhistocompatibilityantigen,DRB1-3chainOS=Homosapiens…	27374000	36263000	1474600	91080000	1	1	662130	1	7288400	1	3.12383e+07	1.59011e+06	19.6454	0.112264
sp|P40939|ECHA_HUMANTrifunctionalenzymesubunitalpha,mitochondrialOS=HomosapiensGN=HADHAPE=1SV=2;tr|H0YFD6|H0YFD6_HUMANTrifunctionalenzymesubunitalpha,mitochondrial(Fragment)OS=HomosapiensGN=HADHAPE=1SV=1	12133000	14945000	1	38606000	22403000	1	1	14971000	9862800	1	1.76174e+07	4.96676e+06	3.54706	0.112778
sp|P00390|GSHR_HUMANGlutathionereductase,mitochondrialOS=HomosapiensGN=GSRPE=1SV=2;tr|H0YC68|H0YC68_HUMANGlutathionereductase,mitochondrial(Fragment)OS=HomosapiensGN=GSRPE=1SV=1;tr|E5RI06|E5RI06_HUMANGlutathionereductase,mitochondrial(Fragment)OS=HomosapiensGN=GSRPE=1SV=8	1	12989000	1	9219500	1	10491000	11057000	5200700	30999000	11095000	4.4417e+06	13768540	0.322598	0.113369
sp|P56856|CLD18_HUMANClaudin-18OS=HomosapiensGN=CLDN18PE=2SV=1;tr|F8WEY4|F8WEY4_HUMANClaudinOS=HomosapiensGN=CLDN18PE=3SV=1	1	1	1	1	2291300	19272000	1	2289900	3322000	8189200	458261	6.61462e+06	0.06928	0.113555
sp|P80188|NGAL_HUMANNeutrophilgelatinase-associatedlipocalinOS=HomosapiensGN=LCN2PE=1SV=2;tr|X6R8F3|X6R8F3_HUMANNeutrophilgelatinase-associatedlipocalinOS=HomosapiensGN=LCN2PE=1SV=1	145900000	363650000	21452000	197670000	1	9450800	15656000	73248000	16776000	20329000	1.45734e+08	27091960	5.37925	0.114228
sp|O00299|CLIC1_HUMANChlorideintracellularchannelprotein1OS=HomosapiensGN=CLIC1PE=1SV=4	194960000	230580000	1	102640000	66041000	207420000	158410000	277110000	138660000	511110000	1.18844e+08	258542000	0.459671	0.117185
sp|Q9UHG3|PCYOX_HUMANPrenylcysteineoxidase1OS=HomosapiensGN=PCYOX1PE=1SV=3;tr|C9JGT6|C9JGT6_HUMANPrenylcysteineoxidase1(Fragment)OS=HomosapiensGN=PCYOX1PE=1SV=8;tr|C9JM55|C9JM55_HUMANPrenylcysteineoxidase1(Fragment)OS=HomosapiensGN=PCYOX1PE=1SV=1;tr|C9K055|C9K055_HUMANPrenylcysteineoxidase1(Fragment)OS=HomosapiensGN=PCYOX1PE=1SV=1;tr|F8W8W4|F8W8W4_HUMANPrenylcysteineoxidase1OS=HomosapiensGN=PCYOX…	4025800	4465400	1	10824000	1	1	1	1701900	1	1	3.86304e+06	340381	11.3492	0.118171
sp|P08670|VIME_HUMANVimentinOS=HomosapiensGN=VIMPE=1SV=4;tr|B0YJC4|B0YJC4_HUMANVimentinOS=HomosapiensGN=VIMPE=1SV=1;tr|B0YJC5|B0YJC5_HUMANVimentinOS=HomosapiensGN=VIMPE=1SV=1;tr|A0A1B0GTT5|A0A1B0GTT5_HUMANVimentin(Fragment)OS=HomosapiensGN=VIMPE=1SV=1;sp|P17661|DESM_HUMANDesminOS=HomosapiensGN=DESPE=1SV=3;tr|A0A1B0GVG8|A0A1B0GVG8_HUMANVimentin(Fragment)OS=HomosapiensGN=VIMPE=1SV=1;tr|H7C5W5|H7C5W…	1027600000	762400000	1033500000	1508900000	165170000	515880000	154500000	95358000	944140000	452940000	899514000	432563600	2.0795	0.118223
sp|P27824|CALX_HUMANCalnexinOS=HomosapiensGN=CANXPE=1SV=2;tr|H0Y9Q7|H0Y9Q7_HUMANCalnexin(Fragment)OS=HomosapiensGN=CANXPE=1SV=1;tr|D6RAU8|D6RAU8_HUMANCalnexin(Fragment)OS=HomosapiensGN=CANXPE=1SV=1;tr|D6RB85|D6RB85_HUMANCalnexin(Fragment)OS=HomosapiensGN=CANXPE=1SV=1;tr|D6RDP7|D6RDP7_HUMANCalnexin(Fragment)OS=HomosapiensGN=CANXPE=1SV=1;tr|D6RGY2|D6RGY2_HUMANCalnexin(Fragment)OS=HomosapiensGN=CANX…	19341000	71584000	9666500	148350000	245540000	1	1	76274000	10601000	1	98896300	1.7375e+07	5.69187	0.118258
tr|G3V1N2|G3V1N2_HUMANHCG1745306,isoformCRA_aOS=HomosapiensGN=HBA2PE=1SV=1	13980000	4917600	207560000	159180000	8239900	10491000	1	1485200	1229700	1642900	78775500	2.96976e+06	26.5259	0.119168
sp|P47755|CAZA2_HUMANF-actin-cappingproteinsubunitalpha-2OS=HomosapiensGN=CAPZA2PE=1SV=3;tr|C9JUG7|C9JUG7_HUMANF-actin-cappingproteinsubunitalpha-2OS=HomosapiensGN=CAPZA2PE=1SV=1;tr|F8W9N7|F8W9N7_HUMANF-actin-cappingproteinsubunitalpha-2OS=HomosapiensGN=CAPZA2PE=1SV=1;tr|A0A0D9SET8|A0A0D9SET8_HUMANF-actin-cappingproteinsubunitalpha-2OS=HomosapiensGN=CAPZA2PE=1SV=1;tr|F8WED3|F8WED3_HUMANF-actin-ca…	10936000	9367400	1	14554000	1	11129000	12431000	20037000	6553100	18314000	6.97148e+06	13692820	0.509134	0.11923
sp|P60842|IF4A1_HUMANEukaryoticinitiationfactor4A-IOS=HomosapiensGN=EIF4A1PE=1SV=1;tr|J3KTB5|J3KTB5_HUMANEukaryoticinitiationfactor4A-I(Fragment)OS=HomosapiensGN=EIF4A1PE=1SV=1;tr|J3KT12|J3KT12_HUMANEukaryoticinitiationfactor4A-IOS=HomosapiensGN=EIF4A1PE=1SV=1;tr|J3QS69|J3QS69_HUMANEukaryoticinitiationfactor4A-I(Fragment)OS=HomosapiensGN=EIF4A1PE=1SV=1;tr|J3QKZ9|J3QKZ9_HUMANEukaryoticinitiationfa…	30308000	36404000	9523900	53675000	3628000	76553000	1913300	147000000	73365000	50319000	26707780	69830060	0.382468	0.124993
sp|P30273|FCERG_HUMANHighaffinityimmunoglobulinepsilonreceptorsubunitgammaOS=HomosapiensGN=FCER1GPE=1SV=1	34143000	39735000	5534400	28273000	1	732790000	1	111620000	695570000	1	2.15371e+07	3.07996e+08	0.0699265	0.125331
sp|P62269|RS18_HUMAN40SribosomalproteinS18OS=HomosapiensGN=RPS18PE=1SV=3;tr|A0A0G2JQH2|A0A0G2JQH2_HUMAN40SribosomalproteinS18OS=HomosapiensGN=RPS18PE=1SV=1;tr|Q5GGW2|Q5GGW2_HUMAN40SribosomalproteinS18OS=HomosapiensGN=RPS18PE=1SV=1	27622000	12863000	23043000	26529000	8245000	1	1	11092000	28846000	1	19660400	7.9876e+06	2.46136	0.126107
sp|B9A064|IGLL5_HUMANImmunoglobulinlambda-likepolypeptide5OS=HomosapiensGN=IGLL5PE=2SV=2;tr|A0A0B4J231|A0A0B4J231_HUMANImmunoglobulinlambda-likepolypeptide5OS=HomosapiensGN=IGLL5PE=1SV=1;sp|P0CG04|IGLC1_HUMANImmunoglobulinlambdaconstant1OS=HomosapiensGN=IGLC1PE=1SV=1	25015000	11792000	22784000	13679000	10058000	26451000	54128000	16633000	52540000	171930000	16665600	64336400	0.259038	0.127422
sp|P07814|SYEP_HUMANBifunctionalglutamate/proline--tRNAligaseOS=HomosapiensGN=EPRSPE=1SV=5;tr|V9GYZ6|V9GYZ6_HUMANBifunctionalglutamate/proline--tRNAligase(Fragment)OS=HomosapiensGN=EPRSPE=1SV=1;tr|A0A0U1RR66|A0A0U1RR66_HUMANGlutamine--tRNAligase(Fragment)OS=HomosapiensGN=QARSPE=1SV=1;tr|A0A0U1RQT0|A0A0U1RQT0_HUMANGlutamine--tRNAligase(Fragment)OS=HomosapiensGN=QARSPE=1SV=1	10201000	2847900	894350	6707900	1	18123000	1	85886000	62014000	1803000	4.13023e+06	3.35652e+07	0.123051	0.127482
sp|O95786|DDX58_HUMANProbableATP-dependentRNAhelicaseDDX58OS=HomosapiensGN=DDX58PE=1SV=2;tr|A2A376|A2A376_HUMANProbableATP-dependentRNAhelicaseDDX58OS=HomosapiensGN=DDX58PE=1SV=1	1	1	1	2422100	1	7495400	1	10267000	2642900	1	484421	4.08106e+06	0.1187	0.128421
sp|P19367|HXK1_HUMANHexokinase-1OS=HomosapiensGN=HK1PE=1SV=3;tr|B1AR63|B1AR63_HUMANPhosphotransferase(Fragment)OS=HomosapiensGN=HK1PE=1SV=8;tr|B1AR62|B1AR62_HUMANPhosphotransferase(Fragment)OS=HomosapiensGN=HK1PE=1SV=1;tr|B1AR61|B1AR61_HUMANPhosphotransferase(Fragment)OS=HomosapiensGN=HK1PE=1SV=1	1	1	8389800	10194000	1	34356000	1	1	34681000	17768000	3.71676e+06	1.7361e+07	0.214087	0.128657
sp|P80723|BASP1_HUMANBrainacidsolubleprotein1OS=HomosapiensGN=BASP1PE=1SV=2;tr|U3KQP0|U3KQP0_HUMANBrainacidsolubleprotein1(Fragment)OS=HomosapiensGN=BASP1PE=1SV=8	389100000	300470000	1416200	215530000	44735000	34626000	1	202780000	6034400	1595700	190250240	4.90072e+07	3.88209	0.129275
sp|Q6IA69|NADE_HUMANGlutamine-dependentNAD(+)synthetaseOS=HomosapiensGN=NADSYN1PE=1SV=3;tr|E9PNF5|E9PNF5_HUMANGlutamine-dependentNAD(+)synthetase(Fragment)OS=HomosapiensGN=NADSYN1PE=1SV=1;tr|A0A0B4J216|A0A0B4J216_HUMANGlutamine-dependentNAD(+)synthetaseOS=HomosapiensGN=NADSYN1PE=1SV=1;tr|H0YCQ6|H0YCQ6_HUMANGlutamine-dependentNAD(+)synthetase(Fragment)OS=HomosapiensGN=NADSYN1PE=1SV=1;tr|E9PKY6|E9P…	92693000	32803000	1	24400000	1	1	1	5121000	1264100	1	2.99792e+07	1.27702e+06	23.4759	0.130084
sp|P25705|ATPA_HUMANATPsynthasesubunitalpha,mitochondrialOS=HomosapiensGN=ATP5A1PE=1SV=1;tr|K7EK77|K7EK77_HUMANATPsynthasesubunitalpha,mitochondrial(Fragment)OS=HomosapiensGN=ATP5A1PE=1SV=1;tr|K7ENJ4|K7ENJ4_HUMANATPsynthasesubunitalpha,mitochondrial(Fragment)OS=HomosapiensGN=ATP5A1PE=1SV=1;tr|K7ERX7|K7ERX7_HUMANATPsynthasesubunitalpha,mitochondrial(Fragment)OS=HomosapiensGN=ATP5A1PE=1SV=1;tr|K7EQ…	16447000	23049000	7416800	35012000	1	1	15756000	1	8299900	1	1.6385e+07	4.81118e+06	3.4056	0.130144
sp|O75947|ATP5H_HUMANATPsynthasesubunitd,mitochondrialOS=HomosapiensGN=ATP5HPE=1SV=3;tr|F5H608|F5H608_HUMANATPsynthasesubunitd,mitochondrialOS=HomosapiensGN=ATP5HPE=1SV=2	4296300	1	1	14799000	7557700	1	3133900	1	1	1	5.3306e+06	626781	8.50473	0.135262
tr|E9PN95|E9PN95_HUMANUteroglobinOS=HomosapiensGN=SCGB1A1PE=1SV=1;sp|P11684|UTER_HUMANUteroglobinOS=HomosapiensGN=SCGB1A1PE=1SV=1	243990000	669760000	133370000	278840000	64617000	46702000	54954000	3643500	162400000	198580000	278115400	93255900	2.98228	0.135902
sp|Q96CX2|KCD12_HUMANBTB/POZdomain-containingproteinKCTD12OS=HomosapiensGN=KCTD12PE=1SV=1	10210000	8112400	1	8905000	1	9702300	52766000	2284000	10845000	29067000	5.44548e+06	20932860	0.26014	0.136991
tr|A0A0J9YY99|A0A0J9YY99_HUMANUncharacterizedprotein(Fragment)OS=HomosapiensPE=1SV=1;sp|P0DP03|HV335_HUMANImmunoglobulinheavyvariable3-30-5OS=HomosapiensGN=IGHV3-30-5PE=3SV=1;sp|P01768|HV330_HUMANImmunoglobulinheavyvariable3-30OS=HomosapiensGN=IGHV3-30PE=1SV=2;sp|P01764|HV323_HUMANImmunoglobulinheavyvariable3-23OS=HomosapiensGN=IGHV3-23PE=1SV=2	1	1	15620000	4842600	1	1	10483000	192390000	327150000	22072000	4.09252e+06	1.10419e+08	0.0370636	0.139212
sp|P62195|PRS8_HUMAN26Sproteasomeregulatorysubunit8OS=HomosapiensGN=PSMC5PE=1SV=1;tr|J3QQM1|J3QQM1_HUMAN26Sproteasomeregulatorysubunit8(Fragment)OS=HomosapiensGN=PSMC5PE=1SV=1;tr|J3QLH6|J3QLH6_HUMAN26Sproteasomeregulatorysubunit8(Fragment)OS=HomosapiensGN=PSMC5PE=1SV=1;tr|J3KRP2|J3KRP2_HUMAN26Sproteasomeregulatorysubunit8(Fragment)OS=HomosapiensGN=PSMC5PE=1SV=1;tr|J3QSA9|J3QSA9_HUMAN26Sproteasome…	5933200	3850000	1	4684400	1	24317000	1	60151000	12504000	5635000	2.89352e+06	2.05214e+07	0.141	0.140479
tr|H0YEN5|H0YEN5_HUMAN40SribosomalproteinS2(Fragment)OS=HomosapiensGN=RPS2PE=1SV=1;sp|P15880|RS2_HUMAN40SribosomalproteinS2OS=HomosapiensGN=RPS2PE=1SV=2;tr|I3L404|I3L404_HUMAN40SribosomalproteinS2(Fragment)OS=HomosapiensGN=RPS2PE=1SV=1;tr|E9PM36|E9PM36_HUMAN40SribosomalproteinS2OS=HomosapiensGN=RPS2PE=1SV=1;tr|E9PMM9|E9PMM9_HUMAN40SribosomalproteinS2(Fragment)OS=HomosapiensGN=RPS2PE=1SV=1;tr|E9PQ…	1	8687000	5735100	1	1	19661000	1	123400000	27933000	21025000	2.88442e+06	3.84038e+07	0.0751077	0.142332
sp|P05107|ITB2_HUMANIntegrinbeta-2OS=HomosapiensGN=ITGB2PE=1SV=2;tr|J3KNI6|J3KNI6_HUMANIntegrinbeta(Fragment)OS=HomosapiensGN=ITGB2PE=1SV=1;tr|E7EVZ9|E7EVZ9_HUMANIntegrinbeta(Fragment)OS=HomosapiensGN=ITGB2PE=1SV=1;tr|E5RHT0|E5RHT0_HUMANIntegrinbeta-2(Fragment)OS=HomosapiensGN=ITGB2PE=1SV=1;tr|E5RFI0|E5RFI0_HUMANIntegrinbeta-2(Fragment)OS=HomosapiensGN=ITGB2PE=1SV=1;tr|E5RIE4|E5RIE4_HUMANIntegrin…	1	25255000	7919200	1	33229000	1	1	9244800	1	1	1.32806e+07	1.84896e+06	7.18276	0.143063
sp|P31942|HNRH3_HUMANHeterogeneousnuclearribonucleoproteinH3OS=HomosapiensGN=HNRNPH3PE=1SV=2	5306200	1	1	1	1	9560000	1	14332000	5435500	1	1.06124e+06	5.8655e+06	0.180929	0.144838
sp|Q9NTJ5|SAC1_HUMANPhosphatidylinositidephosphataseSAC1OS=HomosapiensGN=SACM1LPE=1SV=2;tr|F8WCQ2|F8WCQ2_HUMANPhosphatidylinositidephosphataseSAC1OS=HomosapiensGN=SACM1LPE=1SV=1;tr|C9JV50|C9JV50_HUMANPhosphatidylinositidephosphataseSAC1(Fragment)OS=HomosapiensGN=SACM1LPE=1SV=1;tr|E9PGZ4|E9PGZ4_HUMANPhosphatidylinositidephosphataseSAC1OS=HomosapiensGN=SACM1LPE=1SV=1	3458400	1	1	3766400	5244100	1	1	2087300	1176600	1	2.49378e+06	652781	3.82024	0.146144
sp|O95336|6PGL_HUMAN6-phosphogluconolactonaseOS=HomosapiensGN=PGLSPE=1SV=2;tr|M0R261|M0R261_HUMAN6-phosphogluconolactonase(Fragment)OS=HomosapiensGN=PGLSPE=1SV=1;tr|M0R0U3|M0R0U3_HUMAN6-phosphogluconolactonaseOS=HomosapiensGN=PGLSPE=1SV=1;tr|M0R1L2|M0R1L2_HUMAN6-phosphogluconolactonase(Fragment)OS=HomosapiensGN=PGLSPE=1SV=1	9595200	15034000	1	23335000	1	13576000	15157000	6440500	39417000	54035000	9.59284e+06	25725100	0.372898	0.14734
sp|P05090|APOD_HUMANApolipoproteinDOS=HomosapiensGN=APODPE=1SV=1;tr|C9JF17|C9JF17_HUMANApolipoproteinD(Fragment)OS=HomosapiensGN=APODPE=1SV=1;tr|C9JX71|C9JX71_HUMANApolipoproteinD(Fragment)OS=HomosapiensGN=APODPE=1SV=1;tr|F8WBT9|F8WBT9_HUMANApolipoproteinDOS=HomosapiensGN=APODPE=1SV=1	26916000	84951000	19774000	43824000	1	5966000	1	13807000	16575000	21282000	3.5093e+07	1.1526e+07	3.04468	0.150128
tr|H3BR35|H3BR35_HUMANEukaryoticpeptidechainreleasefactorGTP-bindingsubunitERF3A(Fragment)OS=HomosapiensGN=GSPT1PE=1SV=1;sp|P15170|ERF3A_HUMANEukaryoticpeptidechainreleasefactorGTP-bindingsubunitERF3AOS=HomosapiensGN=GSPT1PE=1SV=1;sp|Q8IYD1|ERF3B_HUMANEukaryoticpeptidechainreleasefactorGTP-bindingsubunitERF3BOS=HomosapiensGN=GSPT2PE=1SV=2	4755800	1	1	1	1	12410000	1	1	12144000	3511600	951161	5.61312e+06	0.169453	0.153023
sp|Q16851|UGPA_HUMANUTP--glucose-1-phosphateuridylyltransferaseOS=HomosapiensGN=UGP2PE=1SV=5;tr|A0A087WYS1|A0A087WYS1_HUMANUTP--glucose-1-phosphateuridylyltransferaseOS=HomosapiensGN=UGP2PE=1SV=1;tr|E7EUC7|E7EUC7_HUMANUTP--glucose-1-phosphateuridylyltransferaseOS=HomosapiensGN=UGP2PE=1SV=1;tr|C9JQU9|C9JQU9_HUMANUTP--glucose-1-phosphateuridylyltransferase(Fragment)OS=HomosapiensGN=UGP2PE=1SV=1;tr|…	7433200	48277000	4236500	62572000	13232000	119570000	11687000	22072000	125120000	65816000	27150140	68853000	0.39432	0.153785
sp|Q9BXR0|TGT_HUMANQueuinetRNA-ribosyltransferasecatalyticsubunit1OS=HomosapiensGN=QTRT1PE=1SV=3	5087800	1	1	2332700	8362000	2068800	1	1	1	723400	3.1565e+06	558441	5.65235	0.154752
sp|P98088|MUC5A_HUMANMucin-5ACOS=HomosapiensGN=MUC5ACPE=1SV=4;tr|A0A0G2JM87|A0A0G2JM87_HUMANMucin-2OS=HomosapiensGN=MUC2PE=1SV=1;tr|A0A0G2JR65|A0A0G2JR65_HUMANMucin-2OS=HomosapiensGN=MUC2PE=1SV=1;sp|Q02817|MUC2_HUMANMucin-2OS=HomosapiensGN=MUC2PE=1SV=2	1979100000	4640700000	165310000	3792200000	810750000	1905000000	1225100000	144670000	667670000	270240000	2277612000	842536000	2.70328	0.154957
sp|P62263|RS14_HUMAN40SribosomalproteinS14OS=HomosapiensGN=RPS14PE=1SV=3;tr|H0YB22|H0YB22_HUMAN40SribosomalproteinS14(Fragment)OS=HomosapiensGN=RPS14PE=1SV=1;tr|E5RH77|E5RH77_HUMAN40SribosomalproteinS14OS=HomosapiensGN=RPS14PE=1SV=1	7631500	1	4452400	5269900	1	1	1	1	3969400	1	3.47076e+06	793881	4.37189	0.155267
sp|Q9H223|EHD4_HUMANEHdomain-containingprotein4OS=HomosapiensGN=EHD4PE=1SV=1	22308000	15922000	1	15910000	1	29419000	1	53526000	23820000	22998000	1.0828e+07	2.59526e+07	0.417222	0.15711
tr|B4DLR8|B4DLR8_HUMANNAD(P)Hdehydrogenase[quinone]1OS=HomosapiensGN=NQO1PE=1SV=1;tr|H3BNV2|H3BNV2_HUMANNAD(P)Hdehydrogenase[quinone]1OS=HomosapiensGN=NQO1PE=1SV=1;sp|P15559|NQO1_HUMANNAD(P)Hdehydrogenase[quinone]1OS=HomosapiensGN=NQO1PE=1SV=1;tr|H3BRK3|H3BRK3_HUMANNAD(P)Hdehydrogenase[quinone]1OS=HomosapiensGN=NQO1PE=1SV=1	30857000	77214000	1	127100000	1	1853300	1	1	1	34770000	4.70342e+07	7.32466e+06	6.42135	0.157277
sp|Q8NFJ5|RAI3_HUMANRetinoicacid-inducedprotein3OS=HomosapiensGN=GPRC5APE=1SV=2;tr|F5GWG3|F5GWG3_HUMANRetinoicacid-inducedprotein3(Fragment)OS=HomosapiensGN=GPRC5APE=1SV=8;tr|H0YFN2|H0YFN2_HUMANRetinoicacid-inducedprotein3(Fragment)OS=HomosapiensGN=GPRC5APE=1SV=1	1	18630000	884790	8861900	1	688170000	37495000	24687000	14211000	272620000	5.67534e+06	207436600	0.0273594	0.157755
tr|K7EMA7|K7EMA7_HUMAN60SribosomalproteinL23aOS=HomosapiensGN=RPL23APE=1SV=1;sp|P62750|RL23A_HUMAN60SribosomalproteinL23aOS=HomosapiensGN=RPL23APE=1SV=1;tr|H7BY10|H7BY10_HUMAN60SribosomalproteinL23a(Fragment)OS=HomosapiensGN=RPL23APE=1SV=1;tr|K7EJV9|K7EJV9_HUMAN60SribosomalproteinL23a(Fragment)OS=HomosapiensGN=RPL23APE=1SV=1;tr|K7ERT8|K7ERT8_HUMAN60SribosomalproteinL23a(Fragment)OS=HomosapiensGN=…	5096800	3296300	9202200	4858300	1	1	1	1687900	6044000	1	4.49072e+06	1.54638e+06	2.90402	0.158585
sp|P11021|GRP78_HUMAN78kDaglucose-regulatedproteinOS=HomosapiensGN=HSPA5PE=1SV=2	11116000	31092000	40171000	136430000	7476000	12335000	2067500	2625600	23094000	1	45257000	8.02442e+06	5.63991	0.159204
tr|H0Y512|H0Y512_HUMANAdipocyteplasmamembrane-associatedprotein(Fragment)OS=HomosapiensGN=APMAPPE=1SV=1;sp|Q9HDC9|APMAP_HUMANAdipocyteplasmamembrane-associatedproteinOS=HomosapiensGN=APMAPPE=1SV=2	23968000	61709000	1	18226000	63482000	8560700	1	38256000	8976100	1	3.3477e+07	1.11586e+07	3.00012	0.15926
sp|Q9NZ08|ERAP1_HUMANEndoplasmicreticulumaminopeptidase1OS=HomosapiensGN=ERAP1PE=1SV=3	4176300	3708300	1	5625500	1	1	1	1	3309000	1	2.70202e+06	661801	4.08283	0.16208
sp|Q13263|TIF1B_HUMANTranscriptionintermediaryfactor1-betaOS=HomosapiensGN=TRIM28PE=1SV=5;tr|M0R0K9|M0R0K9_HUMANTranscriptionintermediaryfactor1-beta(Fragment)OS=HomosapiensGN=TRIM28PE=1SV=1	1	1	1	1983000	1	1	1	17626000	18310000	1	396601	7.1872e+06	0.0551815	0.163042
tr|A0A075B730|A0A075B730_HUMANEpiplakinOS=HomosapiensGN=EPPK1PE=1SV=2;tr|A0A087X1U6|A0A087X1U6_HUMANEpiplakinOS=HomosapiensGN=EPPK1PE=1SV=1;sp|P58107|EPIPL_HUMANEpiplakinOS=HomosapiensGN=EPPK1PE=1SV=2	23872000	68763000	1	23615000	1	1	1	2622800	8001500	8309000	2.325e+07	3.78666e+06	6.13998	0.163668
sp|P28070|PSB4_HUMANProteasomesubunitbetatype-4OS=HomosapiensGN=PSMB4PE=1SV=4	3712300	8734800	1	10606000	1	8010200	3140200	13142000	49159000	14272000	4.61062e+06	17544680	0.262793	0.163887
sp|Q86X76|NIT1_HUMANNitrilasehomolog1OS=HomosapiensGN=NIT1PE=1SV=2	8039400	6877700	1	1	22401000	1	1	2545800	3019700	1	7.46362e+06	1.1131e+06	6.70525	0.164576
sp|Q8IXQ6|PARP9_HUMANPoly[ADP-ribose]polymerase9OS=HomosapiensGN=PARP9PE=1SV=2	1	10434000	1	16649000	1	1	1	1	623950	1	5.4166e+06	124791	43.4054	0.164872
sp|P11413|G6PD_HUMANGlucose-6-phosphate1-dehydrogenaseOS=HomosapiensGN=G6PDPE=1SV=4;tr|E7EM57|E7EM57_HUMANGlucose-6-phosphate1-dehydrogenase(Fragment)OS=HomosapiensGN=G6PDPE=1SV=1;tr|E7EUI8|E7EUI8_HUMANGlucose-6-phosphate1-dehydrogenase(Fragment)OS=HomosapiensGN=G6PDPE=1SV=8;tr|E9PD92|E9PD92_HUMANGlucose-6-phosphate1-dehydrogenase(Fragment)OS=HomosapiensGN=G6PDPE=1SV=1	1	28537000	1	36653000	14496000	65159000	5453600	59462000	142530000	6228800	1.59372e+07	55766680	0.285784	0.166733
sp|P35247|SFTPD_HUMANPulmonarysurfactant-associatedproteinDOS=HomosapiensGN=SFTPDPE=1SV=3;tr|Q5T0M2|Q5T0M2_HUMANPulmonarysurfactant-associatedproteinD(Fragment)OS=HomosapiensGN=SFTPDPE=4SV=1	3301100000	1929700000	407160000	1976400000	1	852370000	166050000	81724000	123460000	1432800000	1.52287e+09	531280800	2.86642	0.167073
sp|P06733|ENOA_HUMANAlpha-enolaseOS=HomosapiensGN=ENO1PE=1SV=2;tr|K7EM90|K7EM90_HUMANAlpha-enolase(Fragment)OS=HomosapiensGN=ENO1PE=1SV=1;tr|F5H1C3|F5H1C3_HUMANGamma-enolase(Fragment)OS=HomosapiensGN=ENO2PE=1SV=1;tr|E5RI09|E5RI09_HUMANBeta-enolase(Fragment)OS=HomosapiensGN=ENO3PE=1SV=1;tr|E5RG95|E5RG95_HUMANBeta-enolase(Fragment)OS=HomosapiensGN=ENO3PE=1SV=1;tr|K7EPM1|K7EPM1_HUMANBeta-enolase(Fra…	175600000	208730000	35039000	125330000	57456000	227940000	109280000	78986000	343520000	600740000	120431000	272093200	0.442609	0.168756
tr|I3L1P8|I3L1P8_HUMANMitochondrial2-oxoglutarate/malatecarrierprotein(Fragment)OS=HomosapiensGN=SLC25A11PE=1SV=1;sp|Q02978|M2OM_HUMANMitochondrial2-oxoglutarate/malatecarrierproteinOS=HomosapiensGN=SLC25A11PE=1SV=3	9149400	6500500	1	16073000	1	1	1	4888200	2757600	1	6.34458e+06	1.52916e+06	4.14906	0.168974
sp|P45974|UBP5_HUMANUbiquitincarboxyl-terminalhydrolase5OS=HomosapiensGN=USP5PE=1SV=2	2070300	1	1	1	1	1	21873000	5427900	5288600	1	414061	6.5179e+06	0.0635267	0.169527
sp|Q9Y230|RUVB2_HUMANRuvB-like2OS=HomosapiensGN=RUVBL2PE=1SV=3;tr|X6R2L4|X6R2L4_HUMANRuvB-likehelicaseOS=HomosapiensGN=RUVBL2PE=1SV=1;tr|M0R0Y3|M0R0Y3_HUMANRuvB-likehelicaseOS=HomosapiensGN=RUVBL2PE=1SV=1;tr|M0QXI6|M0QXI6_HUMANRuvB-likehelicase(Fragment)OS=HomosapiensGN=RUVBL2PE=1SV=1;tr|M0R0Z0|M0R0Z0_HUMANRuvB-likehelicaseOS=HomosapiensGN=RUVBL2PE=1SV=1;tr|M0QXZ7|M0QXZ7_HUMANRuvB-like2OS=Homosap…	17155000	16055000	1	15696000	1	31826000	1	32186000	23362000	15704000	9.7812e+06	2.06156e+07	0.474456	0.1707
sp|P04406|G3P_HUMANGlyceraldehyde-3-phosphatedehydrogenaseOS=HomosapiensGN=GAPDHPE=1SV=3;tr|E7EUT5|E7EUT5_HUMANGlyceraldehyde-3-phosphatedehydrogenaseOS=HomosapiensGN=GAPDHPE=1SV=1;sp|O14556|G3PT_HUMANGlyceraldehyde-3-phosphatedehydrogenase,testis-specificOS=HomosapiensGN=GAPDHSPE=1SV=2	66077000	132290000	103960000	385140000	946250000	486720000	497180000	643350000	698810000	585130000	326743400	582238000	0.561185	0.170702
tr|B7Z685|B7Z685_HUMANGuanylatecyclase1,soluble,beta3,isoformCRA_cOS=HomosapiensGN=GUCY1B3PE=1SV=1;tr|D6RC99|D6RC99_HUMANGuanylatecyclasesolublesubunitbeta-1OS=HomosapiensGN=GUCY1B3PE=1SV=1;sp|Q02153|GCYB1_HUMANGuanylatecyclasesolublesubunitbeta-1OS=HomosapiensGN=GUCY1B3PE=1SV=1;tr|E9PCN2|E9PCN2_HUMANGuanylatecyclasesolublesubunitbeta-1OS=HomosapiensGN=GUCY1B3PE=1SV=1	8560700	1	36963000	9914800	1	1	3980000	1	1	1	1.10877e+07	796001	13.9293	0.170858
sp|P57737|CORO7_HUMANCoronin-7OS=HomosapiensGN=CORO7PE=1SV=2;tr|A0A0A6YYL4|A0A0A6YYL4_HUMANCoroninOS=HomosapiensGN=CORO7-PAM16PE=3SV=1;tr|I3L359|I3L359_HUMANCoronin-7OS=HomosapiensGN=CORO7PE=4SV=1;tr|I3L351|I3L351_HUMANCoronin-7(Fragment)OS=HomosapiensGN=CORO7PE=4SV=1;tr|I3L442|I3L442_HUMANCoronin-7(Fragment)OS=HomosapiensGN=CORO7PE=4SV=1;tr|I3L426|I3L426_HUMANCoronin(Fragment)OS=HomosapiensGN=CO…	26662000	7746400	1672300	15343000	1	1	1	1	11034000	1	1.02847e+07	2.2068e+06	4.66048	0.171204
sp|O95837|GNA14_HUMANGuaninenucleotide-bindingproteinsubunitalpha-14OS=HomosapiensGN=GNA14PE=1SV=1	3446600	1	1	1114800	1	3092200	1	9706300	7125500	1	912281	3.9848e+06	0.22894	0.172455
tr|A6NKZ2|A6NKZ2_HUMANN-acylglucosamine2-epimeraseOS=HomosapiensGN=RENBPPE=1SV=2;sp|P51606|RENBP_HUMANN-acylglucosamine2-epimeraseOS=HomosapiensGN=RENBPPE=1SV=2	1	1	4907600	1	1	8600500	1	1	3609900	10845000	981521	4.61108e+06	0.212861	0.172769
tr|F6U784|F6U784_HUMANRas-relatedproteinRap-2aOS=HomosapiensGN=RAP2APE=4SV=1;sp|Q9Y3L5|RAP2C_HUMANRas-relatedproteinRap-2cOS=HomosapiensGN=RAP2CPE=1SV=1;sp|P61225|RAP2B_HUMANRas-relatedproteinRap-2bOS=HomosapiensGN=RAP2BPE=1SV=1;sp|P10114|RAP2A_HUMANRas-relatedproteinRap-2aOS=HomosapiensGN=RAP2APE=1SV=1	1	8530200	4845700	5772700	1	1	1	4738600	1	1	3.82972e+06	947721	4.04098	0.172951
sp|P14923|PLAK_HUMANJunctionplakoglobinOS=HomosapiensGN=JUPPE=1SV=3;tr|C9JTX4|C9JTX4_HUMANJunctionplakoglobin(Fragment)OS=HomosapiensGN=JUPPE=1SV=1;tr|C9J826|C9J826_HUMANJunctionplakoglobin(Fragment)OS=HomosapiensGN=JUPPE=1SV=8;tr|C9JK18|C9JK18_HUMANJunctionplakoglobin(Fragment)OS=HomosapiensGN=JUPPE=1SV=8;tr|C9JKY1|C9JKY1_HUMANJunctionplakoglobin(Fragment)OS=HomosapiensGN=JUPPE=1SV=8	350420	1	1	1	1	45955000	10421000	4007800	1626200	1589300	70084.8	12719860	0.00550987	0.173397
sp|Q9BVM2|DPCD_HUMANProteinDPCDOS=HomosapiensGN=DPCDPE=1SV=2;tr|Q5JQQ2|Q5JQQ2_HUMANProteinDPCD(Fragment)OS=HomosapiensGN=DPCDPE=1SV=1;tr|Q5JQQ4|Q5JQQ4_HUMANProteinDPCDOS=HomosapiensGN=DPCDPE=1SV=1	1	24370000	1	18303000	1	1	1	2797000	1	1	8.5346e+06	559401	15.2567	0.173879
sp|P81605|DCD_HUMANDermcidinOS=HomosapiensGN=DCDPE=1SV=2	18772000	13583000	2613700	13215000	1	47798000	1	1	45775000	41326000	9.63674e+06	2.69798e+07	0.357184	0.174038
sp|Q96RY7|IF140_HUMANIntraflagellartransportprotein140homologOS=HomosapiensGN=IFT140PE=1SV=1	1	164360000	1	15801000	54283000	1	1	3343400	1	1	4.68888e+07	668681	70.1213	0.174372
sp|P25815|S100P_HUMANProteinS100-POS=HomosapiensGN=S100PPE=1SV=2	20836000	17967000	94994000	16097000	122170000	223790000	31511000	967360000	366360000	1	54412800	3.17804e+08	0.171215	0.174945
sp|P61006|RAB8A_HUMANRas-relatedproteinRab-8AOS=HomosapiensGN=RAB8APE=1SV=1	2528300	1	1	1158600	1	3448000	1	6666200	2249600	794570	737381	2.63167e+06	0.280194	0.175031
sp|P22392|NDKB_HUMANNucleosidediphosphatekinaseBOS=HomosapiensGN=NME2PE=1SV=1;tr|Q32Q12|Q32Q12_HUMANNucleosidediphosphatekinaseOS=HomosapiensGN=NME1-NME2PE=1SV=1;sp|O60361|NDK8_HUMANPutativenucleosidediphosphatekinaseOS=HomosapiensGN=NME2P1PE=5SV=1;tr|J3KPD9|J3KPD9_HUMANNME1-NME2readthroughOS=HomosapiensGN=NME1-NME2PE=1SV=1;tr|F6XY72|F6XY72_HUMANHCG2001850,isoformCRA_cOS=HomosapiensGN=NME2PE=1SV=2	1	6336600	1	4872000	1	17950000	2191600	4453900	15973000	1	2.24172e+06	8.1137e+06	0.276288	0.175149
tr|A0A0A0MRM8|A0A0A0MRM8_HUMANUnconventionalmyosin-VIOS=HomosapiensGN=MYO6PE=1SV=1;tr|A0A0D9SGC1|A0A0D9SGC1_HUMANUnconventionalmyosin-VIOS=HomosapiensGN=MYO6PE=1SV=1;sp|Q9UM54|MYO6_HUMANUnconventionalmyosin-VIOS=HomosapiensGN=MYO6PE=1SV=4;tr|E7EW20|E7EW20_HUMANUnconventionalmyosin-VIOS=HomosapiensGN=MYO6PE=1SV=2	1	1	9505000	1	1	35810000	1868600	8754400	12750000	1	1.901e+06	1.18366e+07	0.160604	0.176167
tr|F5GZQ3|F5GZQ3_HUMANTrifunctionalenzymesubunitbeta,mitochondrialOS=HomosapiensGN=HADHBPE=1SV=1;sp|P55084|ECHB_HUMANTrifunctionalenzymesubunitbeta,mitochondrialOS=HomosapiensGN=HADHBPE=1SV=3;tr|B5MD38|B5MD38_HUMANTrifunctionalenzymesubunitbeta,mitochondrialOS=HomosapiensGN=HADHBPE=1SV=1	5643600	5878300	1	24514000	1	1	1	1	2409400	1	7.20718e+06	481881	14.9564	0.176809
tr|C9JXB8|C9JXB8_HUMAN60SribosomalproteinL24OS=HomosapiensGN=RPL24PE=1SV=1;tr|C9JNW5|C9JNW5_HUMAN60SribosomalproteinL24OS=HomosapiensGN=RPL24PE=1SV=1;sp|P83731|RL24_HUMAN60SribosomalproteinL24OS=HomosapiensGN=RPL24PE=1SV=1	1	1	5145300	1	4973800	1	1	1	875630	1	2.02382e+06	175127	11.5563	0.178011
sp|P32119|PRDX2_HUMANPeroxiredoxin-2OS=HomosapiensGN=PRDX2PE=1SV=5;tr|A6NIW5|A6NIW5_HUMANPeroxiredoxin2,isoformCRA_aOS=HomosapiensGN=PRDX2PE=1SV=2	12218000	1	1	7206300	18495000	19276000	5007600	47904000	84616000	1	7.58386e+06	3.13607e+07	0.241827	0.178168
tr|C9JGI3|C9JGI3_HUMANThymidinephosphorylase(Fragment)OS=HomosapiensGN=TYMPPE=1SV=1;sp|P19971|TYPH_HUMANThymidinephosphorylaseOS=HomosapiensGN=TYMPPE=1SV=2;tr|A0A1W2PP80|A0A1W2PP80_HUMANProteinSCO2homolog,mitochondrial(Fragment)OS=HomosapiensGN=SCO2PE=4SV=1	31835000	44723000	1	17773000	48651000	88664000	9524400	23797000	77130000	203650000	2.85964e+07	80553080	0.355001	0.180686
sp|O00160|MYO1F_HUMANUnconventionalmyosin-IfOS=HomosapiensGN=MYO1FPE=1SV=3;tr|M0QXU2|M0QXU2_HUMANUnconventionalmyosin-If(Fragment)OS=HomosapiensGN=MYO1FPE=1SV=1;tr|H0YLE5|H0YLE5_HUMANUnconventionalmyosin-Ie(Fragment)OS=HomosapiensGN=MYO1EPE=1SV=1;sp|Q12965|MYO1E_HUMANUnconventionalmyosin-IeOS=HomosapiensGN=MYO1EPE=1SV=2	14312000	4245300	1	6233200	1	1	1	1	4440700	1	4.9581e+06	888141	5.58256	0.181349
tr|E7EP17|E7EP17_HUMANDyneinheavychain9,axonemalOS=HomosapiensGN=DNAH9PE=1SV=1;sp|Q9NYC9|DYH9_HUMANDyneinheavychain9,axonemalOS=HomosapiensGN=DNAH9PE=1SV=3;tr|J3QQK8|J3QQK8_HUMANDyneinheavychain9,axonemalOS=HomosapiensGN=DNAH9PE=4SV=1;sp|Q9P225|DYH2_HUMANDyneinheavychain2,axonemalOS=HomosapiensGN=DNAH2PE=2SV=3;sp|Q96DT5|DYH11_HUMANDyneinheavychain11,axonemalOS=HomosapiensGN=DNAH11PE=1SV=4;tr|A0A0…	36839000	20253000	1	9665600	1	1	1	1	12638000	1	1.33515e+07	2.5276e+06	5.28229	0.182049
tr|Q5T0D2|Q5T0D2_HUMANUMP-CMPkinaseOS=HomosapiensGN=CMPK1PE=1SV=1;sp|P30085|KCY_HUMANUMP-CMPkinaseOS=HomosapiensGN=CMPK1PE=1SV=3	13807000	32530000	1	22464000	1	29147000	1	12551000	97775000	71068000	1.37602e+07	4.21082e+07	0.326782	0.182906
sp|Q9UMR7|CLC4A_HUMANC-typelectindomainfamily4memberAOS=HomosapiensGN=CLEC4APE=1SV=1	2428700	1	1	2167200	1	1	1	437090	1	1	919181	87418.8	10.5147	0.183392
sp|Q01082|SPTB2_HUMANSpectrinbetachain,non-erythrocytic1OS=HomosapiensGN=SPTBN1PE=1SV=2;tr|A0A087WUZ3|A0A087WUZ3_HUMANSpectrinbetachainOS=HomosapiensGN=SPTBN1PE=1SV=1;tr|F8W6C1|F8W6C1_HUMANSpectrinbetachain,non-erythrocytic1(Fragment)OS=HomosapiensGN=SPTBN1PE=1SV=1	6923500	1	1	1	9930500	26352000	1	16659000	10600000	1791000	3.3708e+06	1.10804e+07	0.304213	0.184402
sp|P20073|ANXA7_HUMANAnnexinA7OS=HomosapiensGN=ANXA7PE=1SV=3	9704900	10873000	5028600	14423000	1	25684000	32551000	74562000	348370000	14926000	8.0059e+06	99218600	0.0806895	0.186651
sp|P25311|ZA2G_HUMANZinc-alpha-2-glycoproteinOS=HomosapiensGN=AZGP1PE=1SV=2;tr|C9JEV0|C9JEV0_HUMANZinc-alpha-2-glycoproteinOS=HomosapiensGN=AZGP1PE=1SV=1	8101400	10571000	1	15176000	1	1	1	3974100	6433700	1	6.76968e+06	2.08156e+06	3.25221	0.189764
tr|R4GN98|R4GN98_HUMANProteinS100(Fragment)OS=HomosapiensGN=S100A6PE=1SV=1;sp|P06703|S10A6_HUMANProteinS100-A6OS=HomosapiensGN=S100A6PE=1SV=1	3115700	47258000	1	32764000	1	291710000	1	16074000	1106300000	142070000	1.66275e+07	3.11231e+08	0.0534251	0.190165
tr|C9J0K6|C9J0K6_HUMANSorcinOS=HomosapiensGN=SRIPE=1SV=1;sp|P30626|SORCN_HUMANSorcinOS=HomosapiensGN=SRIPE=1SV=1;tr|B4DHQ6|B4DHQ6_HUMANSorcinOS=HomosapiensGN=SRIPE=1SV=1	63385000	33432000	6470500	21216000	74830000	32395000	18410000	12675000	17596000	23553000	39866700	20925800	1.90515	0.190318
sp|Q92572|AP3S1_HUMANAP-3complexsubunitsigma-1OS=HomosapiensGN=AP3S1PE=1SV=1	1	1	1	1	631940	2100300	1	8116300	1228200	1	126389	2.28896e+06	0.0552167	0.191353
sp|P07358|CO8B_HUMANComplementcomponentC8betachainOS=HomosapiensGN=C8BPE=1SV=3;tr|F5GY80|F5GY80_HUMANComplementcomponentC8betachainOS=HomosapiensGN=C8BPE=1SV=1;tr|F5H7G1|F5H7G1_HUMANComplementcomponentC8betachainOS=HomosapiensGN=C8BPE=1SV=1	20953000	27253000	118520000	17824000	1	1	1	1	29791000	1	3.691e+07	5.9582e+06	6.19482	0.192171
sp|P10599|THIO_HUMANThioredoxinOS=HomosapiensGN=TXNPE=1SV=3	70958000	10650000	1	1	1	162600000	2106500	33476000	69431000	34211000	1.63216e+07	60364900	0.270382	0.192461
tr|E9PP36|E9PP36_HUMAN60SribosomalproteinL8OS=HomosapiensGN=RPL8PE=1SV=1;tr|E9PKZ0|E9PKZ0_HUMAN60SribosomalproteinL8(Fragment)OS=HomosapiensGN=RPL8PE=1SV=1;tr|E9PKU4|E9PKU4_HUMAN60SribosomalproteinL8(Fragment)OS=HomosapiensGN=RPL8PE=1SV=1;sp|P62917|RL8_HUMAN60SribosomalproteinL8OS=HomosapiensGN=RPL8PE=1SV=2	1	1	1	1	4113100	5608900	1	5263700	3785200	1	822621	2.93156e+06	0.280609	0.193125
sp|Q99613|EIF3C_HUMANEukaryotictranslationinitiationfactor3subunitCOS=HomosapiensGN=EIF3CPE=1SV=1;sp|B5ME19|EIFCL_HUMANEukaryotictranslationinitiationfactor3subunitC-likeproteinOS=HomosapiensGN=EIF3CLPE=3SV=1	1980700	3017700	1	1078800	1	3405600	1	21793000	8738300	897690	1.21544e+06	6.96692e+06	0.174459	0.193205
sp|P63261|ACTG_HUMANActin,cytoplasmic2OS=HomosapiensGN=ACTG1PE=1SV=1;tr|I3L3I0|I3L3I0_HUMANActin,cytoplasmic2(Fragment)OS=HomosapiensGN=ACTG1PE=1SV=1;tr|I3L1U9|I3L1U9_HUMANActin,cytoplasmic2(Fragment)OS=HomosapiensGN=ACTG1PE=1SV=1;tr|I3L3R2|I3L3R2_HUMANActin,cytoplasmic2(Fragment)OS=HomosapiensGN=ACTG1PE=1SV=1;tr|J3KT65|J3KT65_HUMANActin,cytoplasmic2OS=HomosapiensGN=ACTG1PE=1SV=1	7036900000	6877700000	3068000000	12131000000	1887200000	8592200000	9331100000	11098000000	5921300000	10076000000	6200160000	9003720000	0.688622	0.198717
tr|J3QTA2|J3QTA2_HUMANBAGfamilymolecularchaperoneregulator1OS=HomosapiensGN=BAG1PE=1SV=1;sp|Q99933|BAG1_HUMANBAGfamilymolecularchaperoneregulator1OS=HomosapiensGN=BAG1PE=1SV=4	4789700	8791400	1	1	1	1	1	1	1030200	1	2.71622e+06	206041	13.1829	0.198746
sp|P19105|ML12A_HUMANMyosinregulatorylightchain12AOS=HomosapiensGN=MYL12APE=1SV=2;sp|O14950|ML12B_HUMANMyosinregulatorylightchain12BOS=HomosapiensGN=MYL12BPE=1SV=2;tr|J3QRS3|J3QRS3_HUMANMyosinregulatorylightchain12AOS=HomosapiensGN=MYL12APE=1SV=1;sp|P24844|MYL9_HUMANMyosinregulatorylightpolypeptide9OS=HomosapiensGN=MYL9PE=1SV=4;tr|J3KTJ1|J3KTJ1_HUMANMyosinregulatorylightchain12A(Fragment)OS=Homos…	124200000	146310000	46368000	93084000	44303000	79418000	1	94673000	52883000	44868000	90853000	5.43684e+07	1.67106	0.199907
sp|P02671|FIBA_HUMANFibrinogenalphachainOS=HomosapiensGN=FGAPE=1SV=2;tr|A0A087WUA0|A0A087WUA0_HUMANFibrinogenalphachainOS=HomosapiensGN=FGAPE=1SV=1	124740000	14945000	137780000	57307000	1	80483000	311230000	285100000	82719000	26480000	6.69544e+07	157202400	0.425912	0.201817
sp|Q9Y696|CLIC4_HUMANChlorideintracellularchannelprotein4OS=HomosapiensGN=CLIC4PE=1SV=4	1	6073200	1	6973900	1	11731000	1	7165700	16756000	1713700	2.60942e+06	7.47328e+06	0.349167	0.201985
sp|O76041|NEBL_HUMANNebuletteOS=HomosapiensGN=NEBLPE=1SV=1	593900	1	1	1	1	2268200	1	1	3737100	1	118781	1.20106e+06	0.0988966	0.202905
sp|P00558|PGK1_HUMANPhosphoglyceratekinase1OS=HomosapiensGN=PGK1PE=1SV=3;sp|P07205|PGK2_HUMANPhosphoglyceratekinase2OS=HomosapiensGN=PGK2PE=1SV=3	16348000	348450000	45318000	228050000	32237000	579110000	195830000	44737000	713890000	149950000	134080600	336703400	0.398216	0.203368
sp|O00148|DX39A_HUMANATP-dependentRNAhelicaseDDX39AOS=HomosapiensGN=DDX39APE=1SV=2;sp|Q13838|DX39B_HUMANSpliceosomeRNAhelicaseDDX39BOS=HomosapiensGN=DDX39BPE=1SV=1;tr|F6S4E6|F6S4E6_HUMANSpliceosomeRNAhelicaseDDX39B(Fragment)OS=HomosapiensGN=DDX39BPE=1SV=1;tr|A0A0A0MT12|A0A0A0MT12_HUMANSpliceosomeRNAhelicaseDDX39B(Fragment)OS=HomosapiensGN=DDX39BPE=1SV=6;tr|F6TRA5|F6TRA5_HUMANSpliceosomeRNAhelicas…	14605000	10627000	7748300	14392000	50387000	1	3978600	14046000	16642000	4682700	19551860	7.86986e+06	2.4844	0.203497
sp|Q9UBQ7|GRHPR_HUMANGlyoxylatereductase/hydroxypyruvatereductaseOS=HomosapiensGN=GRHPRPE=1SV=1;tr|U3KQ56|U3KQ56_HUMANGlyoxylatereductase/hydroxypyruvatereductaseOS=HomosapiensGN=GRHPRPE=1SV=1	1	43459000	1	27540000	1	1	1	1	7560900	1	1.41998e+07	1.51218e+06	9.39028	0.204213
sp|P25398|RS12_HUMAN40SribosomalproteinS12OS=HomosapiensGN=RPS12PE=1SV=3	1	1	2623700	1	1	1	1	9465500	15141000	1	524741	4.9213e+06	0.106626	0.20518
tr|E7EQG2|E7EQG2_HUMANEukaryoticinitiationfactor4A-IIOS=HomosapiensGN=EIF4A2PE=1SV=1;sp|Q14240|IF4A2_HUMANEukaryoticinitiationfactor4A-IIOS=HomosapiensGN=EIF4A2PE=1SV=2;tr|J3KSN7|J3KSN7_HUMANEukaryoticinitiationfactor4A-II(Fragment)OS=HomosapiensGN=EIF4A2PE=1SV=1;tr|J3KT04|J3KT04_HUMANEukaryoticinitiationfactor4A-I(Fragment)OS=HomosapiensGN=EIF4A1PE=1SV=1;tr|J3KS93|J3KS93_HUMANEukaryoticinitiatio…	12362000	6514600	1	12552000	35339000	8936900	1	1	12741000	1	1.33535e+07	4.33558e+06	3.07998	0.205933
sp|Q9NT62|ATG3_HUMANUbiquitin-like-conjugatingenzymeATG3OS=HomosapiensGN=ATG3PE=1SV=1;tr|F8WDI0|F8WDI0_HUMANUbiquitin-like-conjugatingenzymeATG3OS=HomosapiensGN=ATG3PE=1SV=1	36934000	11645000	7544900	12912000	1	1	9102000	10104000	4639300	1	1.38072e+07	4.76906e+06	2.89516	0.206119
sp|Q12907|LMAN2_HUMANVesicularintegral-membraneproteinVIP36OS=HomosapiensGN=LMAN2PE=1SV=1	11032000	2479000	1	7967100	1	1	1	820090	4337500	1	4.29562e+06	1.03152e+06	4.16437	0.207354
tr|G3V295|G3V295_HUMANProteasomesubunitalphatypeOS=HomosapiensGN=PSMA6PE=1SV=1;sp|P60900|PSA6_HUMANProteasomesubunitalphatype-6OS=HomosapiensGN=PSMA6PE=1SV=1;tr|G3V5Z7|G3V5Z7_HUMANProteasomesubunitalphatypeOS=HomosapiensGN=PSMA6PE=1SV=1;tr|G3V3U4|G3V3U4_HUMANProteasomesubunitalphatypeOS=HomosapiensGN=PSMA6PE=1SV=1;tr|G3V3I1|G3V3I1_HUMANProteasomesubunitalphatypeOS=HomosapiensGN=PSMA6PE=1SV=1;tr|G…	35649000	30690000	1	12712000	1	18417000	1	66171000	78296000	29263000	1.58102e+07	3.84294e+07	0.411409	0.207634
sp|P53396|ACLY_HUMANATP-citratesynthaseOS=HomosapiensGN=ACLYPE=1SV=3;tr|K7ESG8|K7ESG8_HUMANATP-citratesynthase(Fragment)OS=HomosapiensGN=ACLYPE=1SV=1;tr|K7EIE7|K7EIE7_HUMANATP-citratesynthase(Fragment)OS=HomosapiensGN=ACLYPE=1SV=1	1	510600	1	379060	5587100	61809000	1	14652000	797700	8111900	1.29535e+06	1.70741e+07	0.0758664	0.208988
sp|P06727|APOA4_HUMANApolipoproteinA-IVOS=HomosapiensGN=APOA4PE=1SV=3	190780000	164390000	1120200000	216860000	13388000	5505700	14576000	121000000	173480000	21302000	341123600	67172740	5.0783	0.209642
tr|H0YLF3|H0YLF3_HUMANBeta-2-microglobulin(Fragment)OS=HomosapiensGN=B2MPE=1SV=1;tr|F5H6I0|F5H6I0_HUMANBeta-2-microglobulinOS=HomosapiensGN=B2MPE=1SV=2;sp|P61769|B2MG_HUMANBeta-2-microglobulinOS=HomosapiensGN=B2MPE=1SV=1	45585000	55543000	13923000	99625000	2907500	9781400	12897000	51014000	3181600	10711000	43516700	17517000	2.48426	0.209996
tr|A0A1W2PRZ7|A0A1W2PRZ7_HUMANHeterogeneousnuclearribonucleoproteinU(Fragment)OS=HomosapiensGN=HNRNPUPE=1SV=1;tr|A0A1W2PQ74|A0A1W2PQ74_HUMANHeterogeneousnuclearribonucleoproteinUOS=HomosapiensGN=HNRNPUPE=1SV=1;tr|A0A1W2PQL0|A0A1W2PQL0_HUMANHeterogeneousnuclearribonucleoproteinU(Fragment)OS=HomosapiensGN=HNRNPUPE=1SV=1;tr|A0A1W2PP34|A0A1W2PP34_HUMANHeterogeneousnuclearribonucleoproteinUOS=Homosapi…	40402000	10968000	15755000	15385000	48124000	34882000	1	8411800	16343000	4827800	26126800	1.28929e+07	2.02645	0.210197
sp|O43490|PROM1_HUMANProminin-1OS=HomosapiensGN=PROM1PE=1SV=1;tr|D6RIF3|D6RIF3_HUMANProminin-1(Fragment)OS=HomosapiensGN=PROM1PE=1SV=8	199420000	428050000	1	84662000	1	2633200	23278000	105110000	14276000	5377400	1.42426e+08	30134920	4.72629	0.210428
sp|P01833|PIGR_HUMANPolymericimmunoglobulinreceptorOS=HomosapiensGN=PIGRPE=1SV=4	754590000	1469200000	614700000	829710000	195670000	419610000	1116800000	946550000	1819300000	3816100000	772774000	1623672000	0.475942	0.211646
sp|P31146|COR1A_HUMANCoronin-1AOS=HomosapiensGN=CORO1APE=1SV=4;tr|H3BRY3|H3BRY3_HUMANCoroninOS=HomosapiensGN=CORO1APE=1SV=1;tr|H3BTU6|H3BTU6_HUMANCoronin(Fragment)OS=HomosapiensGN=CORO1APE=1SV=1;tr|H3BRJ0|H3BRJ0_HUMANCoronin(Fragment)OS=HomosapiensGN=CORO1APE=1SV=1;tr|H3BNA2|H3BNA2_HUMANCoronin(Fragment)OS=HomosapiensGN=CORO1APE=1SV=1;tr|H3BU76|H3BU76_HUMANCoronin(Fragment)OS=HomosapiensGN=CORO1A…	33856000	19224000	1785500	21102000	10011000	25412000	61682000	288390000	54917000	5499100	17195700	87180020	0.197244	0.212038
tr|G3V3R6|G3V3R6_HUMANGalectinOS=HomosapiensGN=LGALS3PE=1SV=1;sp|P17931|LEG3_HUMANGalectin-3OS=HomosapiensGN=LGALS3PE=1SV=5	13153000	1	15551000	38061000	1	11299000	1	1	5782100	1	1.3353e+07	3.41622e+06	3.90871	0.212268
sp|Q8TDL5|BPIB1_HUMANBPIfold-containingfamilyBmember1OS=HomosapiensGN=BPIFB1PE=1SV=1;tr|A2A2R0|A2A2R0_HUMANBPIfold-containingfamilyBmember1(Fragment)OS=HomosapiensGN=BPIFB1PE=1SV=1	2653000000	8235900000	258120000	4332900000	212050000	4991900000	5870700000	8999000000	3765100000	4017400000	3138394000	5528820000	0.567643	0.212782
sp|Q9P2R3|ANFY1_HUMANRabankyrin-5OS=HomosapiensGN=ANKFY1PE=1SV=2;tr|I3L3P8|I3L3P8_HUMANRabankyrin-5OS=HomosapiensGN=ANKFY1PE=1SV=1	4955500	1	1	12435000	9269200	6360200	1	1	1580700	1	5.33194e+06	1.58818e+06	3.35726	0.213275
sp|Q7Z406|MYH14_HUMANMyosin-14OS=HomosapiensGN=MYH14PE=1SV=2;tr|M0QY43|M0QY43_HUMANMyosin-14(Fragment)OS=HomosapiensGN=MYH14PE=1SV=8;tr|A1L2Z2|A1L2Z2_HUMANMYH14proteinOS=HomosapiensGN=MYH14PE=1SV=1;tr|A0A0C4DFM8|A0A0C4DFM8_HUMANMyosin-14OS=HomosapiensGN=MYH14PE=1SV=1	62826000	13034000	6584600	22753000	1	51311000	13965000	151550000	73828000	5515100	2.10395e+07	59233820	0.355194	0.216403
sp|Q6XQN6|PNCB_HUMANNicotinatephosphoribosyltransferaseOS=HomosapiensGN=NAPRTPE=1SV=2;tr|C9J8U2|C9J8U2_HUMANNicotinatephosphoribosyltransferaseOS=HomosapiensGN=NAPRTPE=1SV=1;tr|G5E977|G5E977_HUMANNicotinatephosphoribosyltransferaseOS=HomosapiensGN=NAPRTPE=1SV=1;tr|A0A087WUT5|A0A087WUT5_HUMANNicotinatephosphoribosyltransferase(Fragment)OS=HomosapiensGN=NAPRTPE=1SV=1	1	14093000	1	1	1	8236700	1	10863000	11465000	6895200	2.8186e+06	7.49198e+06	0.376216	0.216896
sp|P21980|TGM2_HUMANProtein-glutaminegamma-glutamyltransferase2OS=HomosapiensGN=TGM2PE=1SV=2;tr|A2A299|A2A299_HUMANProtein-glutaminegamma-glutamyltransferase2(Fragment)OS=HomosapiensGN=TGM2PE=1SV=8;tr|A2A2A0|A2A2A0_HUMANProtein-glutaminegamma-glutamyltransferase2(Fragment)OS=HomosapiensGN=TGM2PE=1SV=8;sp|P49221|TGM4_HUMANProtein-glutaminegamma-glutamyltransferase4OS=HomosapiensGN=TGM4PE=1SV=2	376310000	242400000	42783000	214580000	1	451880000	194460000	278410000	297970000	207630000	1.75215e+08	286070000	0.612489	0.217211
sp|P40121|CAPG_HUMANMacrophage-cappingproteinOS=HomosapiensGN=CAPGPE=1SV=2;tr|E7ENU9|E7ENU9_HUMANMacrophage-cappingprotein(Fragment)OS=HomosapiensGN=CAPGPE=1SV=1;tr|H7C0X8|H7C0X8_HUMANMacrophage-cappingprotein(Fragment)OS=HomosapiensGN=CAPGPE=1SV=1;tr|B8ZZL6|B8ZZL6_HUMANMacrophage-cappingprotein(Fragment)OS=HomosapiensGN=CAPGPE=1SV=1	42855000	92152000	60613000	79420000	1	193330000	47831000	72326000	131950000	47047000	5.5008e+07	98496800	0.558475	0.218305
sp|Q8WUM4|PDC6I_HUMANProgrammedcelldeath6-interactingproteinOS=HomosapiensGN=PDCD6IPPE=1SV=1;tr|C9IZF9|C9IZF9_HUMANProgrammedcelldeath6-interactingprotein(Fragment)OS=HomosapiensGN=PDCD6IPPE=1SV=1;tr|F8WEQ7|F8WEQ7_HUMANProgrammedcelldeath6-interactingproteinOS=HomosapiensGN=PDCD6IPPE=1SV=1;tr|F8WBR8|F8WBR8_HUMANProgrammedcelldeath6-interactingproteinOS=HomosapiensGN=PDCD6IPPE=1SV=1;tr|F8WDK9|F8WD…	219760000	163810000	7509000	348360000	7350100	63842000	41053000	121720000	41467000	30768000	149357820	59770000	2.49888	0.219469
sp|P14868|SYDC_HUMANAspartate--tRNAligase,cytoplasmicOS=HomosapiensGN=DARSPE=1SV=2;tr|H7BZ35|H7BZ35_HUMANAspartate--tRNAligase,cytoplasmic(Fragment)OS=HomosapiensGN=DARSPE=1SV=1;tr|C9J7S3|C9J7S3_HUMANAspartate--tRNAligase,cytoplasmic(Fragment)OS=HomosapiensGN=DARSPE=1SV=8;tr|C9JLC1|C9JLC1_HUMANAspartate--tRNAligase,cytoplasmic(Fragment)OS=HomosapiensGN=DARSPE=1SV=1	2439000	1	2024100	3189000	1	14900000	1	28904000	1	1596300	1.53042e+06	9.08006e+06	0.168547	0.224004
sp|Q9BS26|ERP44_HUMANEndoplasmicreticulumresidentprotein44OS=HomosapiensGN=ERP44PE=1SV=1	1	1	1	2024500	1	1234500	1	13693000	4301700	1	404901	3.84584e+06	0.105283	0.224816
sp|P62913|RL11_HUMAN60SribosomalproteinL11OS=HomosapiensGN=RPL11PE=1SV=2;tr|Q5VVC8|Q5VVC8_HUMAN60SribosomalproteinL11(Fragment)OS=HomosapiensGN=RPL11PE=1SV=1;tr|Q5VVC9|Q5VVC9_HUMAN60SribosomalproteinL11(Fragment)OS=HomosapiensGN=RPL11PE=1SV=1	12949000	5261400	15825000	9465100	9283600	1	1	20648000	3567400	1	10556820	4.84308e+06	2.17977	0.229676
sp|P08473|NEP_HUMANNeprilysinOS=HomosapiensGN=MMEPE=1SV=2	1	18034000	1	45850000	1	1	1	3922600	1568600	1	1.27768e+07	1.09824e+06	11.6339	0.23098
sp|Q13564|ULA1_HUMANNEDD8-activatingenzymeE1regulatorysubunitOS=HomosapiensGN=NAE1PE=1SV=1	1	1	1	884650	1	3277100	1	1	15517000	1050400	176931	3.9689e+06	0.0445793	0.235141
sp|Q9Y490|TLN1_HUMANTalin-1OS=HomosapiensGN=TLN1PE=1SV=3;sp|Q9Y4G6|TLN2_HUMANTalin-2OS=HomosapiensGN=TLN2PE=1SV=4;tr|A0A1B0GVU7|A0A1B0GVU7_HUMANTalin-2OS=HomosapiensGN=TLN2PE=1SV=1;tr|H0YMT1|H0YMT1_HUMANTalin-2(Fragment)OS=HomosapiensGN=TLN2PE=1SV=1	25642000	26267000	93143000	59732000	10226000	171620000	6344500	233360000	99561000	6919500	43002000	103561000	0.415234	0.23626
sp|Q96NY7|CLIC6_HUMANChlorideintracellularchannelprotein6OS=HomosapiensGN=CLIC6PE=2SV=3	213450000	69259000	8393700	50486000	1	1	1	10039000	41693000	37182000	6.83177e+07	1.77828e+07	3.84179	0.237145
sp|P60953|CDC42_HUMANCelldivisioncontrolprotein42homologOS=HomosapiensGN=CDC42PE=1SV=2;tr|Q5JYX0|Q5JYX0_HUMANCelldivisioncontrolprotein42homolog(Fragment)OS=HomosapiensGN=CDC42PE=1SV=1	1	57094000	1	1	1	215660000	1	7898800	1	118200000	1.14188e+07	6.83518e+07	0.167059	0.237618
tr|E7ESV4|E7ESV4_HUMANRas-relatedproteinRap-1b(Fragment)OS=HomosapiensGN=RAP1BPE=1SV=1;tr|F5H7Y6|F5H7Y6_HUMANRas-relatedproteinRap-1bOS=HomosapiensGN=RAP1BPE=1SV=1;sp|P61224|RAP1B_HUMANRas-relatedproteinRap-1bOS=HomosapiensGN=RAP1BPE=1SV=1;tr|F5GX62|F5GX62_HUMANRas-relatedproteinRap-1b(Fragment)OS=HomosapiensGN=RAP1BPE=1SV=1;tr|F5H004|F5H004_HUMANRas-relatedproteinRap-1b(Fragment)OS=HomosapiensGN…	94688000	180540000	13278000	113660000	210630000	31044000	1	178020000	84339000	18548000	122559200	6.23902e+07	1.9644	0.238212
tr|B7Z7P8|B7Z7P8_HUMANEukaryoticpeptidechainreleasefactorsubunit1OS=HomosapiensGN=ETF1PE=1SV=1;sp|P62495|ERF1_HUMANEukaryoticpeptidechainreleasefactorsubunit1OS=HomosapiensGN=ETF1PE=1SV=3	1	9343000	1	9801200	1	11651000	1	9920600	23754000	3648300	3.82884e+06	9.79478e+06	0.390906	0.24014
sp|P36955|PEDF_HUMANPigmentepithelium-derivedfactorOS=HomosapiensGN=SERPINF1PE=1SV=4;tr|I3L4N7|I3L4N7_HUMANPigmentepithelium-derivedfactor(Fragment)OS=HomosapiensGN=SERPINF1PE=1SV=1;CON__Q95121;tr|I3L4F9|I3L4F9_HUMANPigmentepithelium-derivedfactor(Fragment)OS=HomosapiensGN=SERPINF1PE=1SV=8;tr|I3L107|I3L107_HUMANPigmentepithelium-derivedfactor(Fragment)OS=HomosapiensGN=SERPINF1PE=1SV=1;tr|I3L4Z0|I…	14988000	35063000	15823000	30034000	1	20508000	25249000	1605200	327320000	107190000	1.91816e+07	96374440	0.199032	0.240145
sp|P07948|LYN_HUMANTyrosine-proteinkinaseLynOS=HomosapiensGN=LYNPE=1SV=3;tr|E5RJ37|E5RJ37_HUMANTyrosine-proteinkinaseLyn(Fragment)OS=HomosapiensGN=LYNPE=1SV=1;tr|H0Y3C5|H0Y3C5_HUMANTyrosine-proteinkinaseOS=HomosapiensGN=HCKPE=1SV=1;tr|J3KPD6|J3KPD6_HUMANTyrosine-proteinkinaseOS=HomosapiensGN=HCKPE=1SV=1;tr|F6SF04|F6SF04_HUMANTyrosine-proteinkinaseOS=HomosapiensGN=HCKPE=1SV=1;sp|P08631|HCK_HUMANTy…	13528000	51855000	1	12103000	15068000	1	25381000	3870600	1	1	1.85108e+07	5.85032e+06	3.16407	0.243291
sp|P08603|CFAH_HUMANComplementfactorHOS=HomosapiensGN=CFHPE=1SV=4;tr|A0A087WYK9|A0A087WYK9_HUMANComplementfactorH-relatedprotein3OS=HomosapiensGN=CFHR3PE=1SV=1;tr|Q6NSD3|Q6NSD3_HUMANCFHR3proteinOS=HomosapiensGN=CFHR3PE=1SV=1;sp|Q02985|FHR3_HUMANComplementfactorH-relatedprotein3OS=HomosapiensGN=CFHR3PE=1SV=2	54328000	70729000	894600000	40691000	64073000	29541000	1	18415000	24815000	1	224884200	1.45542e+07	15.4515	0.244966
tr|Q5HY54|Q5HY54_HUMANFilamin-AOS=HomosapiensGN=FLNAPE=1SV=1;sp|P21333|FLNA_HUMANFilamin-AOS=HomosapiensGN=FLNAPE=1SV=4;tr|Q60FE5|Q60FE5_HUMANFilamin-AOS=HomosapiensGN=FLNAPE=1SV=1;tr|A0A087WWY3|A0A087WWY3_HUMANFilamin-AOS=HomosapiensGN=FLNAPE=1SV=1;tr|F8WE98|F8WE98_HUMANFilamin-A(Fragment)OS=HomosapiensGN=FLNAPE=1SV=2;sp|Q14315|FLNC_HUMANFilamin-COS=HomosapiensGN=FLNCPE=1SV=3;tr|H0Y5C6|H0Y5C6_HU…	598390000	698700000	280980000	1529500000	28861000	447680000	122310000	187450000	557480000	128110000	627286200	288606000	2.1735	0.245294
tr|J3QLD9|J3QLD9_HUMANFlotillin-2OS=HomosapiensGN=FLOT2PE=1SV=1;sp|Q14254|FLOT2_HUMANFlotillin-2OS=HomosapiensGN=FLOT2PE=1SV=2;tr|E7EMK3|E7EMK3_HUMANFlotillin-2OS=HomosapiensGN=FLOT2PE=1SV=1;tr|K7EKW9|K7EKW9_HUMANFlotillin-2(Fragment)OS=HomosapiensGN=FLOT2PE=1SV=1	1	1	1	375910	1	1859100	1	53268000	5490100	3373400	75182.8	1.27981e+07	0.00587452	0.24575
sp|Q15149|PLEC_HUMANPlectinOS=HomosapiensGN=PLECPE=1SV=3;tr|H0YDN1|H0YDN1_HUMANPlectin(Fragment)OS=HomosapiensGN=PLECPE=1SV=8;tr|E9PMV1|E9PMV1_HUMANPlectin(Fragment)OS=HomosapiensGN=PLECPE=1SV=1	5856000	9606500	1	34876000	82997000	269250000	55612000	20613000	94497000	6037800	2.66671e+07	89201960	0.298952	0.245821
sp|P07858|CATB_HUMANCathepsinBOS=HomosapiensGN=CTSBPE=1SV=3	1	1	1	1	4407100	1	1	34231000	12306000	1	881421	9.3074e+06	0.0947011	0.245871
sp|P00403|COX2_HUMANCytochromecoxidasesubunit2OS=HomosapiensGN=MT-CO2PE=1SV=1	1	3214800	1	4493400	1	4289600	3289200	1	3246400	4896600	1.54164e+06	3.14436e+06	0.490288	0.247041
sp|O75369|FLNB_HUMANFilamin-BOS=HomosapiensGN=FLNBPE=1SV=2;tr|E7EN95|E7EN95_HUMANFilamin-BOS=HomosapiensGN=FLNBPE=1SV=1;tr|H7C5L4|H7C5L4_HUMANFilamin-B(Fragment)OS=HomosapiensGN=FLNBPE=1SV=1	1	1	1	1	8636600	16039000	1	2208200	69094000	3384400	1.72732e+06	1.81451e+07	0.0951948	0.247306
sp|P60468|SC61B_HUMANProteintransportproteinSec61subunitbetaOS=HomosapiensGN=SEC61BPE=1SV=2;tr|S4R3B5|S4R3B5_HUMANProteintransportproteinSec61subunitbetaOS=HomosapiensGN=SEC61BPE=1SV=1	5473700	2934100	1	11020000	1	1	1	5233500	1	1	3.88556e+06	1.0467e+06	3.7122	0.253425
tr|D6RAC2|D6RAC2_HUMANReceptorof-activatedproteinCkinase1OS=HomosapiensGN=RACK1PE=1SV=1;sp|P63244|RACK1_HUMANReceptorofactivatedproteinCkinase1OS=HomosapiensGN=RACK1PE=1SV=3;tr|D6REE5|D6REE5_HUMANReceptorof-activatedproteinCkinase1(Fragment)OS=HomosapiensGN=RACK1PE=1SV=1;tr|J3KPE3|J3KPE3_HUMANReceptorof-activatedproteinCkinase1OS=HomosapiensGN=RACK1PE=1SV=1;tr|H0YAM7|H0YAM7_HUMANReceptorof-activa…	14219000	23077000	8526300	47204000	36408000	56146000	9091900	425700000	88313000	26526000	25886860	121155380	0.213667	0.254715
sp|P36871|PGM1_HUMANPhosphoglucomutase-1OS=HomosapiensGN=PGM1PE=1SV=3	22367000	19612000	1	23199000	20347000	4192400	96587000	45003000	41733000	5002500	1.7105e+07	38503580	0.444244	0.255322
sp|A0A075B6K5|LV39_HUMANImmunoglobulinlambdavariable3-9OS=HomosapiensGN=IGLV3-9PE=3SV=1;sp|P80748|LV321_HUMANImmunoglobulinlambdavariable3-21OS=HomosapiensGN=IGLV3-21PE=1SV=2;sp|A0A075B6K2|LV312_HUMANImmunoglobulinlambdavariable3-12OS=HomosapiensGN=IGLV3-12PE=3SV=2	1	1	38714000	12346000	1	8552500	46286000	7372100	62506000	10252000	1.0212e+07	26993720	0.37831	0.25629
sp|O00391|QSOX1_HUMANSulfhydryloxidase1OS=HomosapiensGN=QSOX1PE=1SV=3;tr|A8MXT8|A8MXT8_HUMANSulfhydryloxidase1OS=HomosapiensGN=QSOX1PE=1SV=2	7987200	75403000	4499200	19471000	1	29174000	1158700	5950300	331050000	128570000	2.14721e+07	99180600	0.216495	0.258631
sp|Q13045|FLII_HUMANProteinflightless-1homologOS=HomosapiensGN=FLIIPE=1SV=2;tr|J3KS39|J3KS39_HUMANProteinflightless-1homologOS=HomosapiensGN=FLIIPE=1SV=1;tr|J3KS54|J3KS54_HUMANProteinflightless-1homologOS=HomosapiensGN=FLIIPE=1SV=1	12687000	10356000	1	17344000	1	5191500	40180000	47058000	7202600	2572400	8.0774e+06	20440900	0.395159	0.258696
sp|P51884|LUM_HUMANLumicanOS=HomosapiensGN=LUMPE=1SV=2	4010300	1	14721000	2437200	1	1	1	3930000	1	1	4.2337e+06	786001	5.38638	0.259583
tr|F5GY37|F5GY37_HUMANProhibitin-2OS=HomosapiensGN=PHB2PE=1SV=1;tr|J3KPX7|J3KPX7_HUMANProhibitin-2OS=HomosapiensGN=PHB2PE=1SV=2;sp|Q99623|PHB2_HUMANProhibitin-2OS=HomosapiensGN=PHB2PE=1SV=2;tr|F5H3X6|F5H3X6_HUMANProhibitin-2(Fragment)OS=HomosapiensGN=PHB2PE=1SV=2;tr|F5GWA7|F5GWA7_HUMANProhibitin-2(Fragment)OS=HomosapiensGN=PHB2PE=1SV=1	1	1	2864100	2354600	1	9176600	1	64212000	5839600	1	1.04374e+06	1.58456e+07	0.0658693	0.260923
sp|O14773|TPP1_HUMANTripeptidyl-peptidase1OS=HomosapiensGN=TPP1PE=1SV=2	4842100	1883100	1	4994400	1	23353000	1	947740	2161300	13311000	2.34392e+06	7.95461e+06	0.294662	0.263954
tr|A0A0C4DH35|A0A0C4DH35_HUMANImmunoglobulinheavyvariable3-35(non-functional)(Fragment)OS=HomosapiensGN=IGHV3-35PE=1SV=1	1	1	1111300	1	1	1330500	1	1	16323000	2174200	222261	3.96554e+06	0.056048	0.265242
sp|Q00653|NFKB2_HUMANNuclearfactorNF-kappa-Bp100subunitOS=HomosapiensGN=NFKB2PE=1SV=4	1	1	1	9409600	36324000	1	1	3598700	1	1	9.14672e+06	719741	12.7084	0.267514
sp|Q13813|SPTN1_HUMANSpectrinalphachain,non-erythrocytic1OS=HomosapiensGN=SPTAN1PE=1SV=3;tr|A0A0D9SGF6|A0A0D9SGF6_HUMANSpectrinalphachain,non-erythrocytic1OS=HomosapiensGN=SPTAN1PE=1SV=1;tr|A0A0D9SF54|A0A0D9SF54_HUMANSpectrinalphachain,non-erythrocytic1OS=HomosapiensGN=SPTAN1PE=1SV=1;tr|A0A0D9SFH4|A0A0D9SFH4_HUMANSpectrinalphachain,non-erythrocytic1(Fragment)OS=HomosapiensGN=SPTAN1PE=1SV=1	8726800	7155500	1	1	1	11715000	1	15314000	11200000	1	3.17646e+06	7.6458e+06	0.415452	0.267929
tr|A0A0A0MSW4|A0A0A0MSW4_HUMANPhosphatidylinositoltransferproteinbetaisoformOS=HomosapiensGN=PITPNBPE=1SV=1;sp|P48739|PIPNB_HUMANPhosphatidylinositoltransferproteinbetaisoformOS=HomosapiensGN=PITPNBPE=1SV=2;tr|B3KYB7|B3KYB7_HUMANPhosphatidylinositoltransferproteinbetaisoform(Fragment)OS=HomosapiensGN=PITPNBPE=1SV=8	6681400	1	1	1	1	6895600	1	3373600	6415300	1333700	1.33628e+06	3.60364e+06	0.370814	0.268283
sp|P05141|ADT2_HUMANADP/ATPtranslocase2OS=HomosapiensGN=SLC25A5PE=1SV=7;sp|P12235|ADT1_HUMANADP/ATPtranslocase1OS=HomosapiensGN=SLC25A4PE=1SV=4;tr|V9GYG0|V9GYG0_HUMANADP/ATPtranslocase1OS=HomosapiensGN=SLC25A4PE=1SV=1;sp|Q9H0C2|ADT4_HUMANADP/ATPtranslocase4OS=HomosapiensGN=SLC25A31PE=2SV=1	1575800	30893000	2335000	89606000	1187600	5337900	1	866510	9866800	7636000	25119480	4.74144e+06	5.29786	0.269874
sp|P12814|ACTN1_HUMANAlpha-actinin-1OS=HomosapiensGN=ACTN1PE=1SV=2;tr|H9KV75|H9KV75_HUMANAlpha-actinin-1OS=HomosapiensGN=ACTN1PE=1SV=1;tr|H0YJW3|H0YJW3_HUMANAlpha-actinin-1(Fragment)OS=HomosapiensGN=ACTN1PE=1SV=1;tr|G3V2N5|G3V2N5_HUMANAlpha-actinin-1(Fragment)OS=HomosapiensGN=ACTN1PE=1SV=8;tr|H7C5W8|H7C5W8_HUMANAlpha-actinin-1(Fragment)OS=HomosapiensGN=ACTN1PE=1SV=1;tr|G3V5M4|G3V5M4_HUMANAlpha-ac…	113680000	98442000	23011000	169670000	25882000	48779000	89268000	43970000	56077000	12290000	86137000	50076800	1.7201	0.270283
sp|Q9NZN4|EHD2_HUMANEHdomain-containingprotein2OS=HomosapiensGN=EHD2PE=1SV=2	1	1	1	166080	1	5718300	1	1006100	1	1	33216.8	1.34488e+06	0.0246987	0.271695
tr|F8W7T7|F8W7T7_HUMANZincfingerprotein44OS=HomosapiensGN=ZNF44PE=4SV=1;sp|P15621|ZNF44_HUMANZincfingerprotein44OS=HomosapiensGN=ZNF44PE=2SV=3	612560	1	7215200	790060	1	1	443100	1	1	1	1.72356e+06	88620.8	19.4488	0.271708
sp|P67870|CSK2B_HUMANCaseinkinaseIIsubunitbetaOS=HomosapiensGN=CSNK2BPE=1SV=1;tr|Q5SRQ3|Q5SRQ3_HUMANCaseinkinaseIIsubunitbetaOS=HomosapiensGN=CSNK2BPE=1SV=1;tr|Q5SRQ6|Q5SRQ6_HUMANCaseinkinaseIIsubunitbetaOS=HomosapiensGN=CSNK2BPE=1SV=2;tr|N0E472|N0E472_HUMANCaseinkinaseIIsubunitbetaOS=HomosapiensGN=CSNK2B-LY6G5B--991PE=1SV=1;tr|A0A0G2JM12|A0A0G2JM12_HUMANCaseinkinaseIIsubunitbetaOS=HomosapiensGN=…	1	1	1	1	1887500	1	1	17798000	4551400	1	377501	4.46988e+06	0.0844543	0.271784
sp|P36507|MP2K2_HUMANDualspecificitymitogen-activatedproteinkinasekinase2OS=HomosapiensGN=MAP2K2PE=1SV=1	3235700	4845600	1	5560100	1	1	1	4753300	1	1	2.72828e+06	950661	2.86988	0.27352
sp|P02743|SAMP_HUMANSerumamyloidP-componentOS=HomosapiensGN=APCSPE=1SV=2	1	1	1	1353300	6816500	1	7569000	103900000	13388000	1	1.63396e+06	2.49714e+07	0.0654333	0.275438
tr|G3XAM2|G3XAM2_HUMANComplementfactorIOS=HomosapiensGN=CFIPE=1SV=1;sp|P05156|CFAI_HUMANComplementfactorIOS=HomosapiensGN=CFIPE=1SV=2;tr|E7ETH0|E7ETH0_HUMANComplementfactorIOS=HomosapiensGN=CFIPE=1SV=1;tr|A0A087X0I2|A0A087X0I2_HUMANComplementfactorIOS=HomosapiensGN=CFIPE=1SV=1;tr|D6R9Z8|D6R9Z8_HUMANComplementfactorIOS=HomosapiensGN=CFIPE=1SV=1;CON__Q32PI4	11300000	4729100	265860000	22093000	1	1	1	1	3300600	1	6.07964e+07	660121	92.0989	0.275721
sp|A0A0B4J1V0|HV315_HUMANImmunoglobulinheavyvariable3-15OS=HomosapiensGN=IGHV3-15PE=3SV=1	31428000	38771000	477960000	48806000	25749000	1	1	1	20608000	78290000	124542800	1.97796e+07	6.29653	0.276605
sp|P78417|GSTO1_HUMANGlutathioneS-transferaseomega-1OS=HomosapiensGN=GSTO1PE=1SV=2;tr|Q5TA02|Q5TA02_HUMANGlutathioneS-transferaseomega-1(Fragment)OS=HomosapiensGN=GSTO1PE=1SV=1;tr|Q5TA01|Q5TA01_HUMANGlutathioneS-transferaseomega-1(Fragment)OS=HomosapiensGN=GSTO1PE=1SV=1	8133900	9343500	2547800	22977000	1	57726000	1	3477800	183010000	4115700	8.60044e+06	4.96659e+07	0.173166	0.277474
sp|P05155|IC1_HUMANPlasmaproteaseC1inhibitorOS=HomosapiensGN=SERPING1PE=1SV=2;tr|E9PGN7|E9PGN7_HUMANPlasmaproteaseC1inhibitorOS=HomosapiensGN=SERPING1PE=1SV=1;tr|H9KV48|H9KV48_HUMANPlasmaproteaseC1inhibitorOS=HomosapiensGN=SERPING1PE=1SV=1	21053000	80726000	67859000	74279000	1	52082000	57474000	1	179510000	626870000	4.87834e+07	1.83187e+08	0.266304	0.279582
sp|A0MZ66|SHOT1_HUMANShootin-1OS=HomosapiensGN=SHTN1PE=1SV=4	1	1	1914100	1	1	8848900	1	1	3305400	1	382821	2.43086e+06	0.157484	0.280461
tr|Q6P163|Q6P163_HUMANAPOC2proteinOS=HomosapiensGN=APOC2PE=1SV=1;tr|A0A024R0T9|A0A024R0T9_HUMANApolipoproteinC-IIisoform1OS=HomosapiensGN=APOC2PE=1SV=1;sp|P02655|APOC2_HUMANApolipoproteinC-IIOS=HomosapiensGN=APOC2PE=1SV=1;tr|K7ER74|K7ER74_HUMANAPOC4-APOC2readthrough(NMDcandidate)OS=HomosapiensGN=APOC4-APOC2PE=1SV=1;tr|V9GYJ8|V9GYJ8_HUMANApolipoproteinC-IIOS=HomosapiensGN=APOC2PE=4SV=1	1	1	12174000	1	1	9384000	1	123570000	11265000	4011300	2.4348e+06	2.96461e+07	0.082129	0.283895
sp|P30838|AL3A1_HUMANAldehydedehydrogenase,dimericNADP-preferringOS=HomosapiensGN=ALDH3A1PE=1SV=3;tr|C9JMC5|C9JMC5_HUMANAldehydedehydrogenase,dimericNADP-preferring(Fragment)OS=HomosapiensGN=ALDH3A1PE=1SV=1;tr|I3L3I9|I3L3I9_HUMANAldehydedehydrogenase,dimericNADP-preferringOS=HomosapiensGN=ALDH3A1PE=1SV=1;tr|E9PNN6|E9PNN6_HUMANAldehydedehydrogenase,dimericNADP-preferringOS=HomosapiensGN=ALDH3A1PE=…	12913000	9912200	1	10924000	4404700	11508000	8186000	5443600	373070000	49352000	7.63078e+06	89511920	0.0852488	0.284469
sp|P09467|F16P1_HUMANFructose-1,6-bisphosphatase1OS=HomosapiensGN=FBP1PE=1SV=5;tr|Q5VZC3|Q5VZC3_HUMANFructose-1,6-bisphosphatase1(Fragment)OS=HomosapiensGN=FBP1PE=1SV=1	41475000	165930000	12762000	135460000	1	59428000	17448000	12132000	39996000	28413000	7.11254e+07	31483400	2.25914	0.284671
tr|E9PAQ1|E9PAQ1_HUMANProperdinOS=HomosapiensGN=CFPPE=1SV=1;sp|P27918|PROP_HUMANProperdinOS=HomosapiensGN=CFPPE=1SV=2;tr|C9J7V5|C9J7V5_HUMANProperdin(Fragment)OS=HomosapiensGN=CFPPE=1SV=1	3417000	1	68804000	1	10225000	1	1	6472000	1	1	1.64892e+07	1.2944e+06	12.7389	0.28544
sp|P04196|HRG_HUMANHistidine-richglycoproteinOS=HomosapiensGN=HRGPE=1SV=1	22237000	6588100	635990000	41472000	3567900	1	1167100	2145100	1	1	141971000	662441	214.315	0.286303
sp|P30481|1B44_HUMANHLAclassIhistocompatibilityantigen,B-44alphachainOS=HomosapiensGN=HLA-BPE=1SV=1;sp|P30485|1B47_HUMANHLAclassIhistocompatibilityantigen,B-47alphachainOS=HomosapiensGN=HLA-BPE=1SV=1;sp|P30461|1B13_HUMANHLAclassIhistocompatibilityantigen,B-13alphachainOS=HomosapiensGN=HLA-BPE=1SV=1;tr|A0A140TA14|A0A140TA14_HUMANHLAclassIhistocompatibilityantigen,B-46alphachainOS=HomosapiensGN=HLA…	46548000	49380000	2159600	169530000	11886000	17478000	1	67379000	8153400	2562100	55900720	1.91145e+07	2.92452	0.288695
sp|Q5T4S7|UBR4_HUMANE3ubiquitin-proteinligaseUBR4OS=HomosapiensGN=UBR4PE=1SV=1;tr|A0A0A0MSW0|A0A0A0MSW0_HUMANE3ubiquitin-proteinligaseUBR4(Fragment)OS=HomosapiensGN=UBR4PE=1SV=1	9499800	1	15203000	19025000	1	1	1	13172000	4200800	1	8.74556e+06	3.47456e+06	2.51703	0.289414
sp|P17213|BPI_HUMANBactericidalpermeability-increasingproteinOS=HomosapiensGN=BPIPE=1SV=4;tr|H0Y738|H0Y738_HUMANBactericidalpermeability-increasingproteinOS=HomosapiensGN=BPIPE=1SV=2;tr|A0A0D9SFX6|A0A0D9SFX6_HUMANBactericidalpermeability-increasingproteinOS=HomosapiensGN=BPIPE=1SV=1	101960000	99855000	1	64273000	80864000	5480300	8093000	133150000	16721000	8033700	6.93904e+07	34295600	2.0233	0.290729
sp|Q9UGT4|SUSD2_HUMANSushidomain-containingprotein2OS=HomosapiensGN=SUSD2PE=1SV=1	3928100	13049000	1	21289000	1	224510000	1	27150000	22734000	4237400	7.65322e+06	5.57263e+07	0.137336	0.293058
tr|A0A075B7D0|A0A075B7D0_HUMANImmunoglobulinheavyvariable1/OR15-1(non-functional)(Fragment)OS=HomosapiensGN=IGHV1OR15-1PE=1SV=1	1	1	6992900	6005100	19261000	1	1	1	9681600	1	6.4518e+06	1.93632e+06	3.33199	0.293625
tr|Q7Z3Z5|Q7Z3Z5_HUMANMediatorofRNApolymeraseIItranscriptionsubunit12OS=HomosapiensGN=TNRC11PE=1SV=1;sp|Q93074|MED12_HUMANMediatorofRNApolymeraseIItranscriptionsubunit12OS=HomosapiensGN=MED12PE=1SV=4	24159000	1385600	1	1884700	1	1	1	1094800	1	1	5.48586e+06	218961	25.0541	0.293847
sp|Q9H7D0|DOCK5_HUMANDedicatorofcytokinesisprotein5OS=HomosapiensGN=DOCK5PE=1SV=3;tr|H0Y7N4|H0Y7N4_HUMANDedicatorofcytokinesisprotein5(Fragment)OS=HomosapiensGN=DOCK5PE=1SV=1	3863900	1	33360000	1	1	1	937940	1	1	1	7.44478e+06	187589	39.6867	0.298319
sp|P80511|S10AC_HUMANProteinS100-A12OS=HomosapiensGN=S100A12PE=1SV=2	94423000	29744000	248830000	28495000	4043200000	1	6919900	31412000	17870000	1	888938400	1.12404e+07	79.0844	0.298614
sp|P12429|ANXA3_HUMANAnnexinA3OS=HomosapiensGN=ANXA3PE=1SV=3;tr|D6RA82|D6RA82_HUMANAnnexinOS=HomosapiensGN=ANXA3PE=1SV=1;tr|D6RFG5|D6RFG5_HUMANAnnexin(Fragment)OS=HomosapiensGN=ANXA3PE=1SV=1;tr|D6RCA8|D6RCA8_HUMANAnnexin(Fragment)OS=HomosapiensGN=ANXA3PE=1SV=1;tr|D6RAZ8|D6RAZ8_HUMANAnnexin(Fragment)OS=HomosapiensGN=ANXA3PE=1SV=1;tr|D6RFJ9|D6RFJ9_HUMANAnnexinA3(Fragment)OS=HomosapiensGN=ANXA3PE=1S…	19975000	122370000	1157800	65514000	69096000	104610000	22603000	1818800000	222110000	35984000	55622560	440821400	0.126179	0.299146
tr|A0A087X232|A0A087X232_HUMANComplementC1ssubcomponentOS=HomosapiensGN=C1SPE=1SV=1;sp|P09871|C1S_HUMANComplementC1ssubcomponentOS=HomosapiensGN=C1SPE=1SV=1;tr|F8WCZ6|F8WCZ6_HUMANComplementC1ssubcomponentOS=HomosapiensGN=C1SPE=1SV=1;tr|H0Y5D1|H0Y5D1_HUMANComplementC1ssubcomponent(Fragment)OS=HomosapiensGN=C1SPE=1SV=1;tr|F5H7T4|F5H7T4_HUMANComplementC1ssubcomponent(Fragment)OS=HomosapiensGN=C1SPE=…	3779900	2772400	1029600000	2690800	87087000	1	1	3470600	4017100	1	225186020	1.49754e+06	150.371	0.299786
sp|P09210|GSTA2_HUMANGlutathioneS-transferaseA2OS=HomosapiensGN=GSTA2PE=1SV=4;sp|P08263|GSTA1_HUMANGlutathioneS-transferaseA1OS=HomosapiensGN=GSTA1PE=1SV=3;tr|Q5JW85|Q5JW85_HUMANGlutathioneS-transferaseA3OS=HomosapiensGN=GSTA3PE=1SV=1;sp|Q16772|GSTA3_HUMANGlutathioneS-transferaseA3OS=HomosapiensGN=GSTA3PE=1SV=3;sp|Q7RTV2|GSTA5_HUMANGlutathioneS-transferaseA5OS=HomosapiensGN=GSTA5PE=1SV=1;tr|Q5JW8…	9087200	309300000	4681900	202820000	22194000	257410000	46001000	4918500	656740000	311270000	109616620	255267900	0.429418	0.301687
tr|M0R0P7|M0R0P7_HUMAN60SribosomalproteinL18aOS=HomosapiensGN=RPL18APE=1SV=1;tr|M0R3D6|M0R3D6_HUMAN60SribosomalproteinL18a(Fragment)OS=HomosapiensGN=RPL18APE=1SV=1;tr|M0R1A7|M0R1A7_HUMAN60SribosomalproteinL18aOS=HomosapiensGN=RPL18APE=1SV=1;tr|M0R117|M0R117_HUMAN60SribosomalproteinL18aOS=HomosapiensGN=RPL18APE=1SV=1;sp|Q02543|RL18A_HUMAN60SribosomalproteinL18aOS=HomosapiensGN=RPL18APE=1SV=2	1	1	3735500	1	1	8596600	1	1	6113500	1	747101	2.94202e+06	0.253941	0.301996
sp|P02763|A1AG1_HUMANAlpha-1-acidglycoprotein1OS=HomosapiensGN=ORM1PE=1SV=1	10483000	2889800	373040000	7974400	10053000	1	1621600	1	1	1	80888040	324321	249.408	0.302164
sp|P15924|DESP_HUMANDesmoplakinOS=HomosapiensGN=DSPPE=1SV=3	1	2873700	1	527100	1	157090000	148060	882990	12595000	1692700	680161	34481750	0.0197252	0.303516
sp|P63000|RAC1_HUMANRas-relatedC3botulinumtoxinsubstrate1OS=HomosapiensGN=RAC1PE=1SV=1;sp|P60763|RAC3_HUMANRas-relatedC3botulinumtoxinsubstrate3OS=HomosapiensGN=RAC3PE=1SV=1	43888000	189170000	9320500	67867000	22306000	164430000	15016000	399370000	95135000	68223000	66510300	148434800	0.448078	0.303628
sp|P13671|CO6_HUMANComplementcomponentC6OS=HomosapiensGN=C6PE=1SV=3	4411900	2155500	95856000	1062300	5763700	1	2192300	1	5170200	1	21849880	1.4725e+06	14.8386	0.303886
sp|P04075|ALDOA_HUMANFructose-bisphosphatealdolaseAOS=HomosapiensGN=ALDOAPE=1SV=2;tr|J3KPS3|J3KPS3_HUMANFructose-bisphosphatealdolaseOS=HomosapiensGN=ALDOAPE=1SV=1;tr|H3BQN4|H3BQN4_HUMANFructose-bisphosphatealdolaseOS=HomosapiensGN=ALDOAPE=1SV=1;tr|H3BPS8|H3BPS8_HUMANFructose-bisphosphatealdolaseA(Fragment)OS=HomosapiensGN=ALDOAPE=1SV=1;tr|H3BUH7|H3BUH7_HUMANFructose-bisphosphatealdolaseA(Fragmen…	139960000	117180000	38391000	141970000	1	157440000	59974000	147270000	305930000	58999000	8.75002e+07	145922600	0.599634	0.307026
tr|G3V203|G3V203_HUMAN60SribosomalproteinL18OS=HomosapiensGN=RPL18PE=1SV=1;tr|H0YHA7|H0YHA7_HUMAN60SribosomalproteinL18(Fragment)OS=HomosapiensGN=RPL18PE=1SV=1;sp|Q07020|RL18_HUMAN60SribosomalproteinL18OS=HomosapiensGN=RPL18PE=1SV=2;tr|J3QQ67|J3QQ67_HUMAN60SribosomalproteinL18(Fragment)OS=HomosapiensGN=RPL18PE=1SV=1;tr|F8VUA6|F8VUA6_HUMAN60SribosomalproteinL18(Fragment)OS=HomosapiensGN=RPL18PE=1S…	1	8194800	1	1	1	5454200	1	15355000	5046300	1	1.63896e+06	5.1711e+06	0.316946	0.308523
sp|P23528|COF1_HUMANCofilin-1OS=HomosapiensGN=CFL1PE=1SV=3;tr|G3V1A4|G3V1A4_HUMANCofilin1(Non-muscle),isoformCRA_aOS=HomosapiensGN=CFL1PE=1SV=1;tr|E9PP50|E9PP50_HUMANCofilin-1(Fragment)OS=HomosapiensGN=CFL1PE=1SV=8;tr|E9PK25|E9PK25_HUMANCofilin-1OS=HomosapiensGN=CFL1PE=1SV=1;tr|E9PLJ3|E9PLJ3_HUMANCofilin-1(Fragment)OS=HomosapiensGN=CFL1PE=1SV=1;tr|E9PS23|E9PS23_HUMANCofilin-1(Fragment)OS=Homosapi…	135220000	112850000	23171000	120600000	1	25504000	178620000	78386000	158380000	174140000	7.83682e+07	123006000	0.637109	0.30952
sp|P52907|CAZA1_HUMANF-actin-cappingproteinsubunitalpha-1OS=HomosapiensGN=CAPZA1PE=1SV=3	1	50248000	1	1	1	21232000	51986000	11842000	12436000	20233000	1.00496e+07	23545800	0.426811	0.310331
sp|P06702|S10A9_HUMANProteinS100-A9OS=HomosapiensGN=S100A9PE=1SV=1	217790000	335790000	51341000	164960000	5348400000	1	11201000	476090000	25490000	1	1223656200	1.02556e+08	11.9316	0.310912
sp|P04745|AMY1_HUMANAlpha-amylase1OS=HomosapiensGN=AMY1APE=1SV=2;sp|P19961|AMY2B_HUMANAlpha-amylase2BOS=HomosapiensGN=AMY2BPE=1SV=1;sp|P04746|AMYP_HUMANPancreaticalpha-amylaseOS=HomosapiensGN=AMY2APE=1SV=2;tr|H7BZQ8|H7BZQ8_HUMANPancreaticalpha-amylase(Fragment)OS=HomosapiensGN=AMY2APE=1SV=1;tr|Q5T085|Q5T085_HUMANAlpha-amylase1(Fragment)OS=HomosapiensGN=AMY1BPE=1SV=1;tr|C9J2Z5|C9J2Z5_HUMANAlpha-am…	1	1	1	1	490260	1148800	1	6802700	729890	129250000	98052.8	2.75863e+07	0.0035544	0.311496
tr|H7C1M3|H7C1M3_HUMANMatrixmetalloproteinase(Fragment)OS=HomosapiensGN=MMP8PE=1SV=1;sp|P22894|MMP8_HUMANNeutrophilcollagenaseOS=HomosapiensGN=MMP8PE=1SV=1	2574300	1	1	1	21585000	1	1398400	1	1	1	4.83186e+06	279681	17.2763	0.312924
tr|A0A1B0GTP7|A0A1B0GTP7_HUMANAcidceramidaseOS=HomosapiensGN=ASAH1PE=1SV=1;tr|E7EMM4|E7EMM4_HUMANAcidceramidaseOS=HomosapiensGN=ASAH1PE=1SV=1;tr|A0A1B0GW68|A0A1B0GW68_HUMANAcidceramidaseOS=HomosapiensGN=ASAH1PE=1SV=1;tr|A0A1B0GUA4|A0A1B0GUA4_HUMANAcidceramidaseOS=HomosapiensGN=ASAH1PE=1SV=1;tr|A0A1B0GTM3|A0A1B0GTM3_HUMANAcidceramidaseOS=HomosapiensGN=ASAH1PE=1SV=1;tr|A0A1B0GTZ5|A0A1B0GTZ5_HUMANAc…	13355000	32575000	1	38769000	1	13238000	92965000	11072000	39339000	20113000	1.69398e+07	35345400	0.479265	0.317206
sp|Q5T1M5|FKB15_HUMANFK506-bindingprotein15OS=HomosapiensGN=FKBP15PE=1SV=2;tr|A0A0A0MT60|A0A0A0MT60_HUMANPeptidylprolylisomerase(Fragment)OS=HomosapiensGN=FKBP15PE=1SV=1	1	3497400	1	12631000	1	1	1	1	2761800	1	3.22568e+06	552361	5.83981	0.31766
sp|P41218|MNDA_HUMANMyeloidcellnucleardifferentiationantigenOS=HomosapiensGN=MNDAPE=1SV=1;tr|H0Y6P3|H0Y6P3_HUMANMyeloidcellnucleardifferentiationantigen(Fragment)OS=HomosapiensGN=MNDAPE=1SV=1	104660000	171440000	4707400	26748000	1	7512700	12082000	84618000	8632300	1	6.15111e+07	2.2569e+07	2.72547	0.320616
sp|P07737|PROF1_HUMANProfilin-1OS=HomosapiensGN=PFN1PE=1SV=2;tr|K7EJ44|K7EJ44_HUMANProfilinOS=HomosapiensGN=PFN1PE=1SV=1;CON__P02584;tr|I3L3D5|I3L3D5_HUMANProfilin(Fragment)OS=HomosapiensGN=PFN1PE=1SV=1	498390000	293970000	58476000	208620000	6718200	61351000	258500000	76724000	111020000	51959000	213234840	111910800	1.9054	0.320823
tr|H0YD13|H0YD13_HUMANCD44antigenOS=HomosapiensGN=CD44PE=1SV=2;tr|H0Y2P0|H0Y2P0_HUMANCD44antigen(Fragment)OS=HomosapiensGN=CD44PE=1SV=1;sp|P16070|CD44_HUMANCD44antigenOS=HomosapiensGN=CD44PE=1SV=3;tr|H0YE40|H0YE40_HUMANCD44antigen(Fragment)OS=HomosapiensGN=CD44PE=1SV=1;tr|H0YDX6|H0YDX6_HUMANCD44antigen(Fragment)OS=HomosapiensGN=CD44PE=1SV=1;tr|H0YDW7|H0YDW7_HUMANCD44antigen(Fragment)OS=Homosapien…	27215000	22911000	3243000	20870000	3648200	114880000	78877000	6835300	4133700	1	15577440	4.09452e+07	0.380446	0.323191
tr|A0A1B0GV96|A0A1B0GV96_HUMANUncharacterizedproteinOS=HomosapiensGN=LOC105371267PE=4SV=1	224530000	58986000	1	26480000	15416000	1	1	1	90166000	1	6.50824e+07	1.80332e+07	3.60903	0.324404
sp|P30153|2AAA_HUMANSerine/threonine-proteinphosphatase2A65kDaregulatorysubunitAalphaisoformOS=HomosapiensGN=PPP2R1APE=1SV=4;tr|B3KQV6|B3KQV6_HUMANSerine/threonine-proteinphosphatase2A65kDaregulatorysubunitAalphaisoformOS=HomosapiensGN=PPP2R1APE=1SV=1;tr|C9J9C1|C9J9C1_HUMANSerine/threonine-proteinphosphatase2A65kDaregulatorysubunitAalphaisoform(Fragment)OS=HomosapiensGN=PPP2R1APE=1SV=2;tr|E9PH38|…	82000000	46129000	8154200	59591000	19704000	19060000	3615600	53027000	38624000	17946000	43115640	26454520	1.6298	0.325753
tr|F8W8T1|F8W8T1_HUMANInterferon-inducedGTP-bindingproteinMx1OS=HomosapiensGN=MX1PE=1SV=1;sp|P20591|MX1_HUMANInterferon-inducedGTP-bindingproteinMx1OS=HomosapiensGN=MX1PE=1SV=4;tr|H9KVD0|H9KVD0_HUMANInterferon-inducedGTP-bindingproteinMx1(Fragment)OS=HomosapiensGN=MX1PE=1SV=1;tr|H9KVC4|H9KVC4_HUMANInterferon-inducedGTP-bindingproteinMx1(Fragment)OS=HomosapiensGN=MX1PE=1SV=1;tr|H9KVC7|H9KVC7_HUMAN…	4062200	1	1	12381000	1	1	1	1	3377700	1	3.28864e+06	675541	4.86816	0.326176
sp|Q5XUX1|FBXW9_HUMANF-box/WDrepeat-containingprotein9OS=HomosapiensGN=FBXW9PE=1SV=2	1	7627300	1	4591100	1	1	1	1	3306600	1	2.44368e+06	661321	3.69515	0.326416
sp|Q8IZ83|A16A1_HUMANAldehydedehydrogenasefamily16memberA1OS=HomosapiensGN=ALDH16A1PE=1SV=2;tr|F5H4B6|F5H4B6_HUMANAldehydedehydrogenasefamily16memberA1OS=HomosapiensGN=ALDH16A1PE=1SV=1;tr|M0QY06|M0QY06_HUMANAldehydedehydrogenasefamily16memberA1(Fragment)OS=HomosapiensGN=ALDH16A1PE=1SV=1	10596000	9028300	1	11508000	19536000	13824000	3964200	46660000	30088000	2821200	1.01337e+07	19471480	0.520436	0.326427
sp|O60506|HNRPQ_HUMANHeterogeneousnuclearribonucleoproteinQOS=HomosapiensGN=SYNCRIPPE=1SV=2;tr|F6UXX1|F6UXX1_HUMANHeterogeneousnuclearribonucleoproteinQ(Fragment)OS=HomosapiensGN=SYNCRIPPE=1SV=1;tr|B7Z645|B7Z645_HUMANHeterogeneousnuclearribonucleoproteinQOS=HomosapiensGN=SYNCRIPPE=1SV=1;sp|O43390|HNRPR_HUMANHeterogeneousnuclearribonucleoproteinROS=HomosapiensGN=HNRNPRPE=1SV=1	3514300	1	1	1	1	4660400	1	1	8956700	1	702861	2.72342e+06	0.25808	0.326461
sp|P02545|LMNA_HUMANPrelamin-A/COS=HomosapiensGN=LMNAPE=1SV=1;tr|Q3BDU5|Q3BDU5_HUMANPrelamin-A/COS=HomosapiensGN=LMNAPE=1SV=1;tr|Q5TCI8|Q5TCI8_HUMANPrelamin-A/COS=HomosapiensGN=LMNAPE=1SV=1;tr|H0YAB0|H0YAB0_HUMANPrelamin-A/C(Fragment)OS=HomosapiensGN=LMNAPE=1SV=1;tr|A0A0C4DGC5|A0A0C4DGC5_HUMANPrelamin-A/C(Fragment)OS=HomosapiensGN=LMNAPE=1SV=1	40879000	64572000	2351300	511200000	11730000	4965600	6543600	3036500	91644000	11147000	126146460	23467340	5.37541	0.327155
sp|P04217|A1BG_HUMANAlpha-1B-glycoproteinOS=HomosapiensGN=A1BGPE=1SV=4;tr|M0R009|M0R009_HUMANAlpha-1B-glycoprotein(Fragment)OS=HomosapiensGN=A1BGPE=1SV=8	8278500	20490000	96891000	6843100	1	1	1	8119400	27139000	1	2.65005e+07	7.05168e+06	3.75804	0.327807
sp|P02747|C1QC_HUMANComplementC1qsubcomponentsubunitCOS=HomosapiensGN=C1QCPE=1SV=3	92006000	104300000	1101800000	106060000	1	87266000	71150000	53591000	19211000	97385000	2.80833e+08	65720600	4.27314	0.328317
sp|P00738|HPT_HUMANHaptoglobinOS=HomosapiensGN=HPPE=1SV=1;tr|J3QR68|J3QR68_HUMANHaptoglobin(Fragment)OS=HomosapiensGN=HPPE=1SV=1;tr|A0A0C4DGL8|A0A0C4DGL8_HUMANHaptoglobinOS=HomosapiensGN=HPPE=1SV=1;tr|J3QLC9|J3QLC9_HUMANHaptoglobin(Fragment)OS=HomosapiensGN=HPPE=1SV=1;tr|A0A087WU08|A0A087WU08_HUMANHaptoglobinOS=HomosapiensGN=HPPE=1SV=1;tr|H3BS21|H3BS21_HUMANHaptoglobin(Fragment)OS=HomosapiensGN=H…	719650000	29241000	15370000000	50578000	14314000	1508600	1	347670000	18549000	9796300	3236756600	7.55048e+07	42.8682	0.32835
sp|Q16610|ECM1_HUMANExtracellularmatrixprotein1OS=HomosapiensGN=ECM1PE=1SV=2	1834700	1	31448000	1	1	1	1	1	963580	1	6.65654e+06	192717	34.5405	0.328442
tr|E9PNW4|E9PNW4_HUMANCD59glycoproteinOS=HomosapiensGN=CD59PE=1SV=1;sp|P13987|CD59_HUMANCD59glycoproteinOS=HomosapiensGN=CD59PE=1SV=1;tr|E9PR17|E9PR17_HUMANCD59glycoproteinOS=HomosapiensGN=CD59PE=1SV=1;tr|H0YET2|H0YET2_HUMANCD59glycoprotein(Fragment)OS=HomosapiensGN=CD59PE=1SV=1	60203000	67194000	32031000	76053000	1	46871000	18539000	538150000	139220000	12473000	4.70962e+07	151050600	0.311791	0.330603
sp|A0A075B6I0|LV861_HUMANImmunoglobulinlambdavariable8-61OS=HomosapiensGN=IGLV8-61PE=3SV=7	1	1	33972000	1	1331100	1	1	1	452480	1	7.06062e+06	90496.8	78.0207	0.330869
sp|Q13228|SBP1_HUMANSelenium-bindingprotein1OS=HomosapiensGN=SELENBP1PE=1SV=2;tr|A6PVX1|A6PVX1_HUMANSelenium-bindingprotein1(Fragment)OS=HomosapiensGN=SELENBP1PE=1SV=1;tr|F2Z2W8|F2Z2W8_HUMANSelenium-bindingprotein1OS=HomosapiensGN=SELENBP1PE=1SV=1;tr|F8WCR4|F8WCR4_HUMANSelenium-bindingprotein1OS=HomosapiensGN=SELENBP1PE=1SV=1;tr|H0Y532|H0Y532_HUMANSelenium-bindingprotein1(Fragment)OS=HomosapiensG…	26840000	23126000	1	29686000	1	17102000	14245000	4350500	127270000	37619000	1.59304e+07	40117300	0.397096	0.33147
sp|P02042|HBD_HUMANHemoglobinsubunitdeltaOS=HomosapiensGN=HBDPE=1SV=2;tr|E9PFT6|E9PFT6_HUMANHemoglobinsubunitdeltaOS=HomosapiensGN=HBDPE=1SV=1;tr|E9PEW8|E9PEW8_HUMANHemoglobinsubunitdelta(Fragment)OS=HomosapiensGN=HBDPE=1SV=1;tr|C9JRG0|C9JRG0_HUMANHemoglobinsubunitdelta(Fragment)OS=HomosapiensGN=HBDPE=1SV=1	1	1	21056000	12410000	1	22203000	15702000	1	41038000	1	6.6932e+06	1.57886e+07	0.423926	0.331835
sp|P62081|RS7_HUMAN40SribosomalproteinS7OS=HomosapiensGN=RPS7PE=1SV=1;tr|B5MCP9|B5MCP9_HUMAN40SribosomalproteinS7OS=HomosapiensGN=RPS7PE=1SV=1	1	1	1	909050	1	291970	1	889580	16700000	1	181811	3.57631e+06	0.0508375	0.332359
sp|P49189|AL9A1_HUMAN4-trimethylaminobutyraldehydedehydrogenaseOS=HomosapiensGN=ALDH9A1PE=1SV=3	21863000	16536000	1	29951000	1	22241000	10529000	3305000	38516000	44828000	1.367e+07	23883800	0.572354	0.333694
tr|H7C5I5|H7C5I5_HUMANPhospholipidscramblase(Fragment)OS=HomosapiensGN=PLSCR1PE=1SV=1;tr|C9J9P4|C9J9P4_HUMANPhospholipidscramblase(Fragment)OS=HomosapiensGN=PLSCR1PE=1SV=1;tr|C9J7K9|C9J7K9_HUMANPhospholipidscramblaseOS=HomosapiensGN=PLSCR1PE=1SV=1;sp|O15162|PLS1_HUMANPhospholipidscramblase1OS=HomosapiensGN=PLSCR1PE=1SV=1;tr|C9J0H3|C9J0H3_HUMANPhospholipidscramblase(Fragment)OS=HomosapiensGN=PLSCR…	5594000	5678800	3458800	4695100	1	1	4725600	201120000	15608000	1	3.88534e+06	4.42907e+07	0.0877236	0.334257
tr|K7EK60|K7EK60_HUMANFormin-likeprotein1OS=HomosapiensGN=FMNL1PE=1SV=1;sp|O95466|FMNL1_HUMANFormin-likeprotein1OS=HomosapiensGN=FMNL1PE=1SV=3;tr|K7EJE6|K7EJE6_HUMANFormin-likeprotein1(Fragment)OS=HomosapiensGN=FMNL1PE=1SV=1;tr|A0A0A0MR62|A0A0A0MR62_HUMANFormin-likeprotein1OS=HomosapiensGN=FMNL1PE=1SV=1;tr|K7EMY8|K7EMY8_HUMANFormin-likeprotein1(Fragment)OS=HomosapiensGN=FMNL1PE=1SV=1;tr|K7ERL1|K7…	15922000	1	15819000	8811700	15704000	7518700	1	18669000	1	6328700	1.12513e+07	6.50328e+06	1.7301	0.335114
sp|Q12846|STX4_HUMANSyntaxin-4OS=HomosapiensGN=STX4PE=1SV=2	1	1	449340	1	1	722040	1	17792000	1	1	89868.8	3.70281e+06	0.0242704	0.335536
sp|Q7Z5L0|VMO1_HUMANVitellinemembraneouterlayerprotein1homologOS=HomosapiensGN=VMO1PE=1SV=1	1	7343300	1	5920500	1	1	1	568090	3579400	1	2.65276e+06	829499	3.19803	0.336084
sp|P04279|SEMG1_HUMANSemenogelin-1OS=HomosapiensGN=SEMG1PE=1SV=2	722850	1	1	686800	500390	1900100	1	1	15502000	1	382008	3.48042e+06	0.109759	0.336744
sp|P61160|ARP2_HUMANActin-relatedprotein2OS=HomosapiensGN=ACTR2PE=1SV=1;tr|A0A1B0GWD0|A0A1B0GWD0_HUMANActin-relatedprotein2OS=HomosapiensGN=ACTR2PE=1SV=1;tr|A0A1B0GWH0|A0A1B0GWH0_HUMANActin-relatedprotein2OS=HomosapiensGN=ACTR2PE=1SV=1;tr|F5H6T1|F5H6T1_HUMANARP2actin-relatedprotein2homolog(Yeast),isoformCRA_dOS=HomosapiensGN=ACTR2PE=1SV=2	217410000	126640000	39276000	249000000	14773000	57930000	78320000	150800000	46404000	59307000	129419800	78552200	1.64756	0.340433
sp|P00450|CERU_HUMANCeruloplasminOS=HomosapiensGN=CPPE=1SV=1;tr|E9PFZ2|E9PFZ2_HUMANCeruloplasminOS=HomosapiensGN=CPPE=1SV=1;tr|H7C5R1|H7C5R1_HUMANCeruloplasmin(Fragment)OS=HomosapiensGN=CPPE=1SV=1;CON__ENSEMBL:ENSBTAP00000031900;tr|D6RE86|D6RE86_HUMANCeruloplasmin(Fragment)OS=HomosapiensGN=CPPE=1SV=8;tr|H7C5N5|H7C5N5_HUMANCeruloplasmin(Fragment)OS=HomosapiensGN=CPPE=1SV=1	274710000	285820000	1448400000	86344000	32282000	213060000	16149000	302810000	216570000	35342000	425511200	156786200	2.71396	0.342867
sp|P04792|HSPB1_HUMANHeatshockproteinbeta-1OS=HomosapiensGN=HSPB1PE=1SV=2;tr|F8WE04|F8WE04_HUMANHeatshockproteinbeta-1OS=HomosapiensGN=HSPB1PE=1SV=1;tr|C9J3N8|C9J3N8_HUMANHeatshockproteinbeta-1OS=HomosapiensGN=HSPB1PE=1SV=1	13257000	32470000	4825600	35496000	1	55076000	7941900	3687900	50809000	32946000	1.72097e+07	30092160	0.5719	0.344016
tr|A0A0D9SFB3|A0A0D9SFB3_HUMANATP-dependentRNAhelicaseDDX3XOS=HomosapiensGN=DDX3XPE=1SV=1;tr|A0A0D9SG12|A0A0D9SG12_HUMANATP-dependentRNAhelicaseDDX3XOS=HomosapiensGN=DDX3XPE=1SV=1;sp|O15523|DDX3Y_HUMANATP-dependentRNAhelicaseDDX3YOS=HomosapiensGN=DDX3YPE=1SV=2;sp|O00571|DDX3X_HUMANATP-dependentRNAhelicaseDDX3XOS=HomosapiensGN=DDX3XPE=1SV=3;tr|A0A0D9SF53|A0A0D9SF53_HUMANATP-dependentRNAhelicaseDDX…	3447800	1	2944400	2137900	1	7790400	1	670190	6983100	2044400	1.70602e+06	3.49762e+06	0.487766	0.344078
sp|P35579|MYH9_HUMANMyosin-9OS=HomosapiensGN=MYH9PE=1SV=4;sp|P35749|MYH11_HUMANMyosin-11OS=HomosapiensGN=MYH11PE=1SV=3;sp|P35580|MYH10_HUMANMyosin-10OS=HomosapiensGN=MYH10PE=1SV=3;tr|Q5BKV1|Q5BKV1_HUMANMYH9proteinOS=HomosapiensGN=MYH9PE=1SV=1;tr|B1AH99|B1AH99_HUMANMyosin-9(Fragment)OS=HomosapiensGN=MYH9PE=1SV=1;tr|E7ERA5|E7ERA5_HUMANMyosin-10(Fragment)OS=HomosapiensGN=MYH10PE=1SV=8;REV__tr|S4R3H4…	3934600000	1353100000	157930000	2641600000	202220000	1113400000	298390000	2031600000	618750000	206170000	1657890000	853662000	1.94209	0.345092
tr|Q5JX54|Q5JX54_HUMANCopine-1(Fragment)OS=HomosapiensGN=CPNE1PE=1SV=1;tr|Q5JX57|Q5JX57_HUMANCopine-1(Fragment)OS=HomosapiensGN=CPNE1PE=1SV=8;tr|E7EV27|E7EV27_HUMANCopine-1OS=HomosapiensGN=CPNE1PE=1SV=1;tr|Q5JX55|Q5JX55_HUMANCopine-1(Fragment)OS=HomosapiensGN=CPNE1PE=1SV=1;tr|Q5JX56|Q5JX56_HUMANCopine-1(Fragment)OS=HomosapiensGN=CPNE1PE=1SV=1;tr|Q5JX58|Q5JX58_HUMANCopine-1(Fragment)OS=Homosapiens…	1	1	1	1	359070	191040	1	47002000	158390	1	71814.8	9.47029e+06	0.00758317	0.345857
sp|P40306|PSB10_HUMANProteasomesubunitbetatype-10OS=HomosapiensGN=PSMB10PE=1SV=1;tr|J3QQN1|J3QQN1_HUMANProteasomesubunitbetatype-10(Fragment)OS=HomosapiensGN=PSMB10PE=1SV=1	7984900	6115100	1	7268400	1	1	1	8847600	1	1	4.27368e+06	1.76952e+06	2.41516	0.346355
sp|P03952|KLKB1_HUMANPlasmakallikreinOS=HomosapiensGN=KLKB1PE=1SV=1;tr|H0YAC1|H0YAC1_HUMANPlasmakallikrein(Fragment)OS=HomosapiensGN=KLKB1PE=1SV=1;tr|E9PBC5|E9PBC5_HUMANPlasmakallikreinOS=HomosapiensGN=KLKB1PE=1SV=2;tr|C9JCT1|C9JCT1_HUMANPlasmakallikrein(Fragment)OS=HomosapiensGN=KLKB1PE=1SV=1;tr|C9J075|C9J075_HUMANPlasmakallikrein(Fragment)OS=HomosapiensGN=KLKB1PE=1SV=1	1508800	1774400	193750000	1967000	2024500	1	1	3976200	4965800	1	40204940	1.7884e+06	22.4809	0.346425
tr|F8VZY9|F8VZY9_HUMANKeratin,typeIcytoskeletal18OS=HomosapiensGN=KRT18PE=1SV=1;sp|P05783|K1C18_HUMANKeratin,typeIcytoskeletal18OS=HomosapiensGN=KRT18PE=1SV=2	15851000	1	1	1	1	1	1	36150000	19536000	1	3.1702e+06	1.11372e+07	0.28465	0.346564
tr|A0A0C4DFP6|A0A0C4DFP6_HUMANCartilageacidicprotein1OS=HomosapiensGN=CRTAC1PE=1SV=1;sp|Q9NQ79|CRAC1_HUMANCartilageacidicprotein1OS=HomosapiensGN=CRTAC1PE=1SV=2;tr|Q5T4F6|Q5T4F6_HUMANCartilageacidicprotein1(Fragment)OS=HomosapiensGN=CRTAC1PE=1SV=1	28575000	44478000	3413400	14140000	1	26601000	9313400	1356600	39365000	286220000	1.81213e+07	72571200	0.249703	0.346607
sp|P08514|ITA2B_HUMANIntegrinalpha-IIbOS=HomosapiensGN=ITGA2BPE=1SV=3	1	1	38569000	1	1	1	1	1	51137	1	7.7138e+06	10228.2	754.17	0.347198
sp|Q9ULV4|COR1C_HUMANCoronin-1COS=HomosapiensGN=CORO1CPE=1SV=1;tr|B4E3S0|B4E3S0_HUMANCoroninOS=HomosapiensGN=CORO1CPE=1SV=1;tr|H0YHL7|H0YHL7_HUMANCoronin-1C(Fragment)OS=HomosapiensGN=CORO1CPE=1SV=1;tr|F8W1H8|F8W1H8_HUMANCoronin(Fragment)OS=HomosapiensGN=CORO1CPE=1SV=1;tr|F8VUX3|F8VUX3_HUMANCoroninOS=HomosapiensGN=CORO1CPE=1SV=1;tr|F8VSA4|F8VSA4_HUMANCoronin(Fragment)OS=HomosapiensGN=CORO1CPE=1SV=…	31861000	39994000	5504300	84473000	1	287190000	24032000	35198000	46582000	32316000	3.23665e+07	85063600	0.380497	0.347952
tr|B4DPQ0|B4DPQ0_HUMANComplementC1rsubcomponentOS=HomosapiensGN=C1RPE=1SV=1;sp|P00736|C1R_HUMANComplementC1rsubcomponentOS=HomosapiensGN=C1RPE=1SV=2;tr|F5H2D0|F5H2D0_HUMANComplementC1rsubcomponentOS=HomosapiensGN=C1RPE=1SV=3;tr|F5H1V0|F5H1V0_HUMANComplementC1rsubcomponentOS=HomosapiensGN=C1RPE=1SV=1;tr|F5H6Y3|F5H6Y3_HUMANComplementC1rsubcomponent(Fragment)OS=HomosapiensGN=C1RPE=1SV=1;tr|F5H3N3|F5…	2687200	1610100	1474400000	3785300	1785300	2936300	1	3973100	5872600	6257100	296853580	3.80782e+06	77.9589	0.348675
sp|P20742|PZP_HUMANPregnancyzoneproteinOS=HomosapiensGN=PZPPE=1SV=4	1	1	111710000	1	1	1	1	1	551760	1	2.2342e+07	110353	202.46	0.348853
sp|A0A0J9YX35|HV64D_HUMANImmunoglobulinheavyvariable3-64DOS=HomosapiensGN=IGHV3-64DPE=3SV=1	1	1	6710400	1	1	1	1	1	34986	1	1.34208e+06	6998	191.781	0.348979
tr|E7EQB2|E7EQB2_HUMANLactotransferrin(Fragment)OS=HomosapiensGN=LTFPE=1SV=1;tr|E7ER44|E7ER44_HUMANLactotransferrinOS=HomosapiensGN=LTFPE=1SV=1;sp|P02788|TRFL_HUMANLactotransferrinOS=HomosapiensGN=LTFPE=1SV=6;tr|C9JCF5|C9JCF5_HUMANLactotransferrin(Fragment)OS=HomosapiensGN=LTFPE=1SV=1;CON__Q29443;CON__Q0IIK2	1567400000	835290000	10661000	236270000	2055400000	71187000	2252600000	18130000000	291270000	1242500000	941004200	4397511400	0.213986	0.34922
tr|F5GX30|F5GX30_HUMANCation-dependentmannose-6-phosphatereceptorOS=HomosapiensGN=M6PRPE=1SV=2;sp|P20645|MPRD_HUMANCation-dependentmannose-6-phosphatereceptorOS=HomosapiensGN=M6PRPE=1SV=1;tr|F5H4U1|F5H4U1_HUMANCation-dependentmannose-6-phosphatereceptor(Fragment)OS=HomosapiensGN=M6PRPE=1SV=1;tr|F5GXE0|F5GXE0_HUMANCation-dependentmannose-6-phosphatereceptor(Fragment)OS=HomosapiensGN=M6PRPE=1SV=1;t…	64547	91843	1	1	1	1	1	18113000	1	1	31278.6	3.6226e+06	0.00863429	0.350548
tr|Q5JR95|Q5JR95_HUMAN40SribosomalproteinS8OS=HomosapiensGN=RPS8PE=1SV=1;sp|P62241|RS8_HUMAN40SribosomalproteinS8OS=HomosapiensGN=RPS8PE=1SV=2	36931000	10875000	1	9776300	1	10751000	1	1	10842000	1	1.15165e+07	4.3186e+06	2.66671	0.350577
sp|O43866|CD5L_HUMANCD5antigen-likeOS=HomosapiensGN=CD5LPE=1SV=1	1006900	1	1186300000	2542300	1	1	1097700	18677000	569630	1	2.3797e+08	4.06887e+06	58.4855	0.352798
sp|P01591|IGJ_HUMANImmunoglobulinJchainOS=HomosapiensGN=JCHAINPE=1SV=4;tr|D6RD17|D6RD17_HUMANImmunoglobulinJchain(Fragment)OS=HomosapiensGN=JCHAINPE=1SV=8;tr|D6RHJ6|D6RHJ6_HUMANImmunoglobulinJchain(Fragment)OS=HomosapiensGN=JCHAINPE=1SV=1;tr|C9JA05|C9JA05_HUMANImmunoglobulinJchain(Fragment)OS=HomosapiensGN=JCHAINPE=1SV=1	142140000	69911000	983800000	165920000	280910000	390800000	236970000	413900000	324040000	3453200000	328536200	963782000	0.340882	0.353656
sp|P05455|LA_HUMANLupusLaproteinOS=HomosapiensGN=SSBPE=1SV=2;tr|E9PGX9|E9PGX9_HUMANLupusLaprotein(Fragment)OS=HomosapiensGN=SSBPE=1SV=1;tr|E7ERC4|E7ERC4_HUMANLupusLaprotein(Fragment)OS=HomosapiensGN=SSBPE=1SV=1	1	1	1	1	6194800	6827000	1	1	16108000	1	1.23896e+06	4.587e+06	0.270103	0.35397
sp|P00734|THRB_HUMANProthrombinOS=HomosapiensGN=F2PE=1SV=2;tr|E9PIT3|E9PIT3_HUMANProthrombinOS=HomosapiensGN=F2PE=1SV=1;tr|C9JV37|C9JV37_HUMANProthrombin(Fragment)OS=HomosapiensGN=F2PE=1SV=1;CON__P00735	2713500	16100000	1420500000	12019000	2126000	4828400	11905000	2372900	4214700	45711000	290691700	13806400	21.0549	0.355863
tr|E7EX53|E7EX53_HUMANRibosomalproteinL15(Fragment)OS=HomosapiensGN=RPL15PE=1SV=1;tr|E7EQV9|E7EQV9_HUMANRibosomalproteinL15(Fragment)OS=HomosapiensGN=RPL15PE=1SV=1;sp|P61313|RL15_HUMAN60SribosomalproteinL15OS=HomosapiensGN=RPL15PE=1SV=2;tr|E7ENU7|E7ENU7_HUMANRibosomalproteinL15(Fragment)OS=HomosapiensGN=RPL15PE=1SV=1	1	4711100	8356300	9720200	1	1	1	71064000	19845000	1	4.55752e+06	1.81818e+07	0.250664	0.35627
sp|P00740|FA9_HUMANCoagulationfactorIXOS=HomosapiensGN=F9PE=1SV=2	2735000	1	27601000	2092300	1	1	1497300	1	4626300	1	6.48566e+06	1.22472e+06	5.29562	0.357019
sp|P01023|A2MG_HUMANAlpha-2-macroglobulinOS=HomosapiensGN=A2MPE=1SV=3;CON__ENSEMBL:ENSBTAP00000024146;tr|F8W7L3|F8W7L3_HUMANAlpha-2-macroglobulin(Fragment)OS=HomosapiensGN=A2MPE=1SV=1;tr|F5H1E8|F5H1E8_HUMANAlpha-2-macroglobulinOS=HomosapiensGN=A2MPE=1SV=1	3028300000	827940000	104520000000	1992500000	279340000	502310000	2804000000	2115900000	2666000000	2044200000	22129616000	2026482000	10.9202	0.357863
sp|Q92598|HS105_HUMANHeatshockprotein105kDaOS=HomosapiensGN=HSPH1PE=1SV=1;tr|A0A0A0MSM0|A0A0A0MSM0_HUMANHeatshockprotein105kDaOS=HomosapiensGN=HSPH1PE=1SV=1;tr|R4GN69|R4GN69_HUMANHeatshockprotein105kDaOS=HomosapiensGN=HSPH1PE=1SV=1;tr|Q5TBM3|Q5TBM3_HUMANHeatshockprotein105kDa(Fragment)OS=HomosapiensGN=HSPH1PE=1SV=1	24449000	3638100	1	10885000	11753000	12545000	12721000	8513100	70780000	8414100	1.0145e+07	22594640	0.449001	0.35894
sp|Q8TCU6|PREX1_HUMANPhosphatidylinositol3,4,5-trisphosphate-dependentRacexchanger1proteinOS=HomosapiensGN=PREX1PE=1SV=3	1	1	3821700	1	1	1	1	38956000	2392000	1	764341	8.2696e+06	0.0924278	0.359638
sp|O00410|IPO5_HUMANImportin-5OS=HomosapiensGN=IPO5PE=1SV=4;tr|H0Y8C6|H0Y8C6_HUMANImportin-5(Fragment)OS=HomosapiensGN=IPO5PE=1SV=1;tr|C9JZ53|C9JZ53_HUMANImportin-5(Fragment)OS=HomosapiensGN=IPO5PE=1SV=1;tr|E7EQT5|E7EQT5_HUMANImportin-5OS=HomosapiensGN=IPO5PE=1SV=1;tr|E7EV12|E7EV12_HUMANImportin-5(Fragment)OS=HomosapiensGN=IPO5PE=1SV=1;tr|C9JMV5|C9JMV5_HUMANImportin-5(Fragment)OS=HomosapiensGN=IP…	1	1	6770900	1	1	1	7023300	6236500	3280700	1	1.35418e+06	3.3081e+06	0.409353	0.359866
sp|P01042|KNG1_HUMANKininogen-1OS=HomosapiensGN=KNG1PE=1SV=2	27123000	11434000	475670000	8107100	1	23832000	1	10115000	25272000	13307000	1.04467e+08	1.45052e+07	7.20203	0.361816
tr|B1ALA9|B1ALA9_HUMANRibose-phosphatepyrophosphokinase1OS=HomosapiensGN=PRPS1PE=1SV=1;sp|P60891|PRPS1_HUMANRibose-phosphatepyrophosphokinase1OS=HomosapiensGN=PRPS1PE=1SV=2	1	1	1	1	4165800	1	1	8050700	5202000	1	833161	2.65054e+06	0.314336	0.361825
sp|P07225|PROS_HUMANVitaminK-dependentproteinSOS=HomosapiensGN=PROS1PE=1SV=1;tr|G5E9F8|G5E9F8_HUMANProteinS(Alpha),isoformCRA_bOS=HomosapiensGN=PROS1PE=1SV=1;tr|H7BXT0|H7BXT0_HUMANVitaminK-dependentproteinS(Fragment)OS=HomosapiensGN=PROS1PE=1SV=1;tr|C9K0R0|C9K0R0_HUMANVitaminK-dependentproteinS(Fragment)OS=HomosapiensGN=PROS1PE=1SV=1;CON__P07224	13222000	10893000	1813100000	12900000	1	29217000	1	10308000	11338000	54446000	3.70023e+08	2.10618e+07	17.5684	0.361908
sp|P09496|CLCA_HUMANClathrinlightchainAOS=HomosapiensGN=CLTAPE=1SV=1;tr|F8WF69|F8WF69_HUMANClathrinlightchainOS=HomosapiensGN=CLTAPE=1SV=1	2579200	1	3657400	1127700	1	2081600	1	72327000	1799000	1	1.47286e+06	1.52415e+07	0.0966347	0.363706
sp|Q13185|CBX3_HUMANChromoboxproteinhomolog3OS=HomosapiensGN=CBX3PE=1SV=4	1	1	20291000	1	1	1	1	1	741670	1	4.0582e+06	148335	27.3584	0.363841
sp|Q93008|USP9X_HUMANProbableubiquitincarboxyl-terminalhydrolaseFAF-XOS=HomosapiensGN=USP9XPE=1SV=3;sp|O00507|USP9Y_HUMANProbableubiquitincarboxyl-terminalhydrolaseFAF-YOS=HomosapiensGN=USP9YPE=2SV=2	1	2009000	1	1403900	1	1	1	24476000	2159800	1	682581	5.32716e+06	0.128132	0.363891
sp|P50552|VASP_HUMANVasodilator-stimulatedphosphoproteinOS=HomosapiensGN=VASPPE=1SV=3;tr|K7EM16|K7EM16_HUMANVasodilator-stimulatedphosphoprotein(Fragment)OS=HomosapiensGN=VASPPE=1SV=1;tr|K7EQD0|K7EQD0_HUMANVasodilator-stimulatedphosphoprotein(Fragment)OS=HomosapiensGN=VASPPE=1SV=8;tr|K7EIG8|K7EIG8_HUMANVasodilator-stimulatedphosphoprotein(Fragment)OS=HomosapiensGN=VASPPE=1SV=1;tr|K7ENR7|K7ENR7_HU…	1	4743500	1379100	8708600	1	33632000	1	1	10862000	2154200	2.96624e+06	9.32964e+06	0.317937	0.364136
sp|P20851|C4BPB_HUMANC4b-bindingproteinbetachainOS=HomosapiensGN=C4BPBPE=1SV=1;tr|Q5VVQ7|Q5VVQ7_HUMANC4b-bindingproteinbetachain(Fragment)OS=HomosapiensGN=C4BPBPE=1SV=1	1	1	234780000	1	1	2023400	1	6432600	1	1029400	4.6956e+07	1.89708e+06	24.7517	0.365504
tr|A0A087WXM6|A0A087WXM6_HUMAN60SribosomalproteinL17(Fragment)OS=HomosapiensGN=RPL17PE=3SV=1;tr|J3QQT2|J3QQT2_HUMAN60SribosomalproteinL17(Fragment)OS=HomosapiensGN=RPL17PE=3SV=1;tr|J3KRX5|J3KRX5_HUMAN60SribosomalproteinL17(Fragment)OS=HomosapiensGN=RPL17PE=3SV=1;sp|P18621|RL17_HUMAN60SribosomalproteinL17OS=HomosapiensGN=RPL17PE=1SV=3;tr|A0A0A6YYL6|A0A0A6YYL6_HUMANProteinRPL17-C18orf32OS=Homosapie…	11639000	1	8795000	6828900	1	8262300	1	2964600	2644200	1	5.45258e+06	2.77422e+06	1.96545	0.366167
sp|P42224|STAT1_HUMANSignaltransducerandactivatoroftranscription1-alpha/betaOS=HomosapiensGN=STAT1PE=1SV=2;tr|J3KPM9|J3KPM9_HUMANSignaltransducerandactivatoroftranscriptionOS=HomosapiensGN=STAT1PE=1SV=1;tr|E7EPD2|E7EPD2_HUMANSignaltransducerandactivatoroftranscription1-alpha/beta(Fragment)OS=HomosapiensGN=STAT1PE=1SV=1;tr|D2KFR9|D2KFR9_HUMANSignaltransducerandactivatoroftranscription1-alpha/betaO…	13870000	10980000	3354500	70052000	14583000	18659000	1	1	13744000	19281000	22567900	1.03368e+07	2.18326	0.366954
tr|E7EQR4|E7EQR4_HUMANEzrinOS=HomosapiensGN=EZRPE=1SV=3;sp|P15311|EZRI_HUMANEzrinOS=HomosapiensGN=EZRPE=1SV=4;tr|V9GZ54|V9GZ54_HUMANMoesin(Fragment)OS=HomosapiensGN=MSNPE=1SV=1;tr|E9PQ82|E9PQ82_HUMANRadixin(Fragment)OS=HomosapiensGN=RDXPE=1SV=1;tr|E9PNV3|E9PNV3_HUMANRadixin(Fragment)OS=HomosapiensGN=RDXPE=1SV=1	183420000	270640000	25006000	162840000	15346000	67672000	81540000	71583000	123720000	74513000	131450400	83805600	1.56852	0.368383
sp|P13667|PDIA4_HUMANProteindisulfide-isomeraseA4OS=HomosapiensGN=PDIA4PE=1SV=2	1	3582300	1	1	1	1	1	1653600	35739000	1	716461	7.47852e+06	0.0958025	0.369326
sp|P52209|6PGD_HUMAN6-phosphogluconatedehydrogenase,decarboxylatingOS=HomosapiensGN=PGDPE=1SV=3;tr|K7EM49|K7EM49_HUMAN6-phosphogluconatedehydrogenase,decarboxylating(Fragment)OS=HomosapiensGN=PGDPE=1SV=1;tr|K7EPF6|K7EPF6_HUMAN6-phosphogluconatedehydrogenase,decarboxylating(Fragment)OS=HomosapiensGN=PGDPE=1SV=1;tr|K7EMN2|K7EMN2_HUMAN6-phosphogluconatedehydrogenase,decarboxylating(Fragment)OS=Homos…	411790000	306310000	10878000	276840000	44985000	67431000	180300000	74173000	209550000	125800000	210160600	131450800	1.59878	0.36984
sp|P0DOY3|IGLC3_HUMANImmunoglobulinlambdaconstant3OS=HomosapiensGN=IGLC3PE=1SV=1;sp|P0DOY2|IGLC2_HUMANImmunoglobulinlambdaconstant2OS=HomosapiensGN=IGLC2PE=1SV=1;sp|P0CF74|IGLC6_HUMANImmunoglobulinlambdaconstant6OS=HomosapiensGN=IGLC6PE=1SV=1	377100000	613760000	2176800000	620260000	28967000	341590000	1515300000	725360000	1281900000	2350500000	763377400	1242930000	0.614176	0.370619
tr|F5H157|F5H157_HUMANRas-relatedproteinRab-35(Fragment)OS=HomosapiensGN=RAB35PE=1SV=1;sp|Q15286|RAB35_HUMANRas-relatedproteinRab-35OS=HomosapiensGN=RAB35PE=1SV=1;tr|F5H7F8|F5H7F8_HUMANRas-relatedproteinRab-35OS=HomosapiensGN=RAB35PE=1SV=1	1	2431600	1	1656200	1	2122500	1	7941000	758850	572220	817561	2.27891e+06	0.35875	0.372258
sp|P59666|DEF3_HUMANNeutrophildefensin3OS=HomosapiensGN=DEFA3PE=1SV=1	188660000	1239900000	1	876710000	107020000	145290000	218690000	7978300000	1211200000	134620000	4.82458e+08	1937620000	0.248995	0.373284
sp|P01871|IGHM_HUMANImmunoglobulinheavyconstantmuOS=HomosapiensGN=IGHMPE=1SV=4;tr|A0A1B0GUU9|A0A1B0GUU9_HUMANImmunoglobulinheavyconstantmu(Fragment)OS=HomosapiensGN=IGHMPE=1SV=1	2866600000	792380000	18197000000	1076500000	67025000	146740000	1642400000	1669000000	1501400000	1813600000	4599901000	1354628000	3.39569	0.373616
sp|P51857|AK1D1_HUMAN3-oxo-5-beta-steroid4-dehydrogenaseOS=HomosapiensGN=AKR1D1PE=1SV=1	1	1	1	1	90830000	1	1	5216300	1	1	1.8166e+07	1.04326e+06	17.4127	0.374237
sp|Q8IWL2|SFTA1_HUMANPulmonarysurfactant-associatedproteinA1OS=HomosapiensGN=SFTPA1PE=1SV=2;sp|Q8IWL1|SFPA2_HUMANPulmonarysurfactant-associatedproteinA2OS=HomosapiensGN=SFTPA2PE=1SV=1;tr|X6REF7|X6REF7_HUMANPulmonarysurfactant-associatedproteinA2(Fragment)OS=HomosapiensGN=SFTPA2PE=4SV=1;tr|A0A0C4DG36|A0A0C4DG36_HUMANPulmonarysurfactant-associatedproteinA1(Fragment)OS=HomosapiensGN=SFTPA1PE=4SV=1	3124200000	6131000000	1702600000	12277000000	26546000	6835700000	6611600000	1097400000	6654500000	19782000000	4652269200	8196240000	0.56761	0.374596
sp|P08246|ELNE_HUMANNeutrophilelastaseOS=HomosapiensGN=ELANEPE=1SV=1	199040000	196890000	24918000	134700000	3014100000	1934300	1	767570000	1	1	713929600	1.53901e+08	4.63889	0.374897
sp|Q99536|VAT1_HUMANSynapticvesiclemembraneproteinVAT-1homologOS=HomosapiensGN=VAT1PE=1SV=2;tr|K7ESA3|K7ESA3_HUMANSynapticvesiclemembraneproteinVAT-1homolog(Fragment)OS=HomosapiensGN=VAT1PE=1SV=1;tr|K7ERT7|K7ERT7_HUMANSynapticvesiclemembraneproteinVAT-1homolog(Fragment)OS=HomosapiensGN=VAT1PE=1SV=1;tr|K7ENX2|K7ENX2_HUMANSynapticvesiclemembraneproteinVAT-1homolog(Fragment)OS=HomosapiensGN=VAT1PE=1…	26113000	58651000	1	57064000	1	78127000	28599000	20109000	27577000	70700000	2.83656e+07	45022400	0.630033	0.375635
sp|P05198|IF2A_HUMANEukaryotictranslationinitiationfactor2subunit1OS=HomosapiensGN=EIF2S1PE=1SV=3;tr|H0YJS4|H0YJS4_HUMANEukaryotictranslationinitiationfactor2subunit1(Fragment)OS=HomosapiensGN=EIF2S1PE=1SV=1;tr|G3V4T5|G3V4T5_HUMANEukaryotictranslationinitiationfactor2subunit1(Fragment)OS=HomosapiensGN=EIF2S1PE=1SV=1	1	1	1	1	1829100	1	1	1	15151000	818300	365821	3.19386e+06	0.114539	0.375813
tr|C9JP35|C9JP35_HUMANProteinFAM3C(Fragment)OS=HomosapiensGN=FAM3CPE=1SV=1;tr|C9JMN4|C9JMN4_HUMANProteinFAM3C(Fragment)OS=HomosapiensGN=FAM3CPE=1SV=1;sp|Q92520|FAM3C_HUMANProteinFAM3COS=HomosapiensGN=FAM3CPE=1SV=1	1	1	1	1	990830	1	1	15344000	1	1	198167	3.0688e+06	0.0645747	0.377885
sp|Q9UGM3|DMBT1_HUMANDeletedinmalignantbraintumors1proteinOS=HomosapiensGN=DMBT1PE=1SV=2	3793200000	982990000	89573000	938040000	1	87435000	481560000	906550000	281060000	769840000	1.16076e+09	505289000	2.29722	0.380196
tr|A0A0A0MSV6|A0A0A0MSV6_HUMANComplementC1qsubcomponentsubunitB(Fragment)OS=HomosapiensGN=C1QBPE=1SV=6;tr|D6R934|D6R934_HUMANComplementC1qsubcomponentsubunitBOS=HomosapiensGN=C1QBPE=1SV=1;sp|P02746|C1QB_HUMANComplementC1qsubcomponentsubunitBOS=HomosapiensGN=C1QBPE=1SV=3;tr|D6RGJ1|D6RGJ1_HUMANComplementC1qsubcomponentsubunitB(Fragment)OS=HomosapiensGN=C1QBPE=1SV=1	64714000	15054000	1434300000	18278000	1	82398000	1	15309000	59349000	65690000	3.06469e+08	4.45492e+07	6.87934	0.381134
sp|P62906|RL10A_HUMAN60SribosomalproteinL10aOS=HomosapiensGN=RPL10APE=1SV=2	1	1753800	1	1222800	1	1651600	1	1	15284000	1	595321	3.38712e+06	0.17576	0.381496
sp|P05164|PERM_HUMANMyeloperoxidaseOS=HomosapiensGN=MPOPE=1SV=1	52022000	47839000	12540000	48257000	513800000	4774000	123190000	4858900000	142310000	3244200	134891600	1026483640	0.131411	0.381717
sp|Q96GA7|SDSL_HUMANSerinedehydratase-likeOS=HomosapiensGN=SDSLPE=1SV=1	1	2610900	2021400	3209100	1	1	1	2020400	1988600	1	1.56828e+06	801801	1.95595	0.381911
sp|P02647|APOA1_HUMANApolipoproteinA-IOS=HomosapiensGN=APOA1PE=1SV=1;tr|F8W696|F8W696_HUMANApolipoproteinA-IOS=HomosapiensGN=APOA1PE=1SV=1	483070000	320570000	5628800000	370850000	2174900	83593000	278580000	338650000	999630000	101070000	1361092980	360304600	3.77762	0.382429
sp|Q9HC35|EMAL4_HUMANEchinodermmicrotubule-associatedprotein-like4OS=HomosapiensGN=EML4PE=1SV=3;tr|B5MBZ0|B5MBZ0_HUMANEchinodermmicrotubule-associatedprotein-like4OS=HomosapiensGN=EML4PE=1SV=3	6419800	15350000	1	22585000	1	1	1	1	18046000	1	8.87096e+06	3.6092e+06	2.45787	0.384394
sp|Q06323|PSME1_HUMANProteasomeactivatorcomplexsubunit1OS=HomosapiensGN=PSME1PE=1SV=1;tr|H0YKK6|H0YKK6_HUMANProteasomeactivatorcomplexsubunit1OS=HomosapiensGN=PSME1PE=1SV=1;tr|H0YLU2|H0YLU2_HUMANProteasomeactivatorcomplexsubunit1(Fragment)OS=HomosapiensGN=PSME1PE=1SV=1	1	9872900	1	19173000	1	1	1	9424200	1	1	5.80918e+06	1.88484e+06	3.08205	0.386635
sp|Q9NP97|DLRB1_HUMANDyneinlightchainroadblock-type1OS=HomosapiensGN=DYNLRB1PE=1SV=3;sp|Q8TF09|DLRB2_HUMANDyneinlightchainroadblock-type2OS=HomosapiensGN=DYNLRB2PE=1SV=1;tr|H3BNG9|H3BNG9_HUMANDyneinlightchainroadblock-type2OS=HomosapiensGN=DYNLRB2PE=4SV=1;tr|H3BPA0|H3BPA0_HUMANDyneinlightchainroadblock-type2OS=HomosapiensGN=DYNLRB2PE=4SV=1;tr|Q7Z4M1|Q7Z4M1_HUMANDYNLRB2proteinOS=HomosapiensGN=DYNL…	38643000	20648000	1	17103000	1	1	6874500	10156000	21731000	1	1.52788e+07	7.7523e+06	1.97087	0.389239
sp|P78527|PRKDC_HUMANDNA-dependentproteinkinasecatalyticsubunitOS=HomosapiensGN=PRKDCPE=1SV=3	11875000	5558700	2491300	12980000	1	9815900	1	139840000	5433500	1948900	6.581e+06	3.14077e+07	0.209535	0.389364
tr|H0YIB4|H0YIB4_HUMANSerine/arginine-rich-splicingfactor9(Fragment)OS=HomosapiensGN=SRSF9PE=1SV=8;tr|S4R3G0|S4R3G0_HUMANSerine/arginine-rich-splicingfactor9OS=HomosapiensGN=SRSF9PE=1SV=1;sp|Q13242|SRSF9_HUMANSerine/arginine-richsplicingfactor9OS=HomosapiensGN=SRSF9PE=1SV=1	1	1	1014600	1	1	2140200	1	1	1004000	1	202921	628841	0.32269	0.392157
sp|P30488|1B50_HUMANHLAclassIhistocompatibilityantigen,B-50alphachainOS=HomosapiensGN=HLA-BPE=1SV=1;sp|P30487|1B49_HUMANHLAclassIhistocompatibilityantigen,B-49alphachainOS=HomosapiensGN=HLA-BPE=1SV=2;sp|P30483|1B45_HUMANHLAclassIhistocompatibilityantigen,B-45alphachainOS=HomosapiensGN=HLA-BPE=1SV=1	1	1	1	14711000	1	12138000	1	17786000	5411900	1	2.9422e+06	7.06718e+06	0.416319	0.392372
sp|P27361|MK03_HUMANMitogen-activatedproteinkinase3OS=HomosapiensGN=MAPK3PE=1SV=4;tr|H0YEX6|H0YEX6_HUMANMitogen-activatedproteinkinase3(Fragment)OS=HomosapiensGN=MAPK3PE=1SV=1;tr|B3KR49|B3KR49_HUMANMitogen-activatedproteinkinase3OS=HomosapiensGN=MAPK3PE=1SV=1;tr|E9PBK7|E9PBK7_HUMANMitogen-activatedproteinkinaseOS=HomosapiensGN=MAPK3PE=1SV=1;tr|E9PJF0|E9PJF0_HUMANMitogen-activatedproteinkinaseOS=H…	1763300	1	1	1797700	1	4169400	1	1	2549400	979770	712201	1.53971e+06	0.462554	0.392883
sp|P31997|CEAM8_HUMANCarcinoembryonicantigen-relatedcelladhesionmolecule8OS=HomosapiensGN=CEACAM8PE=1SV=2;sp|P13688|CEAM1_HUMANCarcinoembryonicantigen-relatedcelladhesionmolecule1OS=HomosapiensGN=CEACAM1PE=1SV=2	7348300	1172600	1	767550	1	1	1	80930000	1165900	1	1.85769e+06	1.64192e+07	0.113141	0.394675
sp|P61009|SPCS3_HUMANSignalpeptidasecomplexsubunit3OS=HomosapiensGN=SPCS3PE=1SV=1	18169000	11478000	1	13941000	20894000	1	1	29883000	3738000	1	1.28964e+07	6.7242e+06	1.91791	0.394747
tr|A0A0U1RQF0|A0A0U1RQF0_HUMANFattyacidsynthaseOS=HomosapiensGN=FASNPE=1SV=1;sp|P49327|FAS_HUMANFattyacidsynthaseOS=HomosapiensGN=FASNPE=1SV=3;tr|A0A1B0GTR5|A0A1B0GTR5_HUMANFattyacidsynthase(Fragment)OS=HomosapiensGN=FASNPE=1SV=1;tr|A0A0U1RRG3|A0A0U1RRG3_HUMANFattyacidsynthase(Fragment)OS=HomosapiensGN=FASNPE=1SV=1	1	1	1	7333800	22901000	1	1	62166000	26549000	1	6.04696e+06	1.7743e+07	0.340808	0.395276
sp|O00471|EXOC5_HUMANExocystcomplexcomponent5OS=HomosapiensGN=EXOC5PE=1SV=1;tr|A0A0A0MSI8|A0A0A0MSI8_HUMANExocystcomplexcomponent5OS=HomosapiensGN=EXOC5PE=1SV=1;tr|F8W9B8|F8W9B8_HUMANExocystcomplexcomponent5OS=HomosapiensGN=EXOC5PE=1SV=1	1	1	1	1746600	1	1	1	17714000	1	1	349321	3.5428e+06	0.0986002	0.395884
sp|Q96D96|HVCN1_HUMANVoltage-gatedhydrogenchannel1OS=HomosapiensGN=HVCN1PE=1SV=1	1	1	1	1	23875000	1	1	2390100	1	1	4.775e+06	478021	9.98911	0.396706
sp|P31930|QCR1_HUMANCytochromeb-c1complexsubunit1,mitochondrialOS=HomosapiensGN=UQCRC1PE=1SV=3	1	1	1	2787700	1	1	1972800	8973600	1	1	557541	2.18928e+06	0.254668	0.39756
sp|Q96KP4|CNDP2_HUMANCytosolicnon-specificdipeptidaseOS=HomosapiensGN=CNDP2PE=1SV=2;tr|J3QKT2|J3QKT2_HUMANCytosolicnon-specificdipeptidase(Fragment)OS=HomosapiensGN=CNDP2PE=1SV=1;tr|J3QQN6|J3QQN6_HUMANCytosolicnon-specificdipeptidase(Fragment)OS=HomosapiensGN=CNDP2PE=1SV=1;tr|J3QR27|J3QR27_HUMANCytosolicnon-specificdipeptidase(Fragment)OS=HomosapiensGN=CNDP2PE=1SV=1;tr|J3QLU1|J3QLU1_HUMANCytosoli…	38179000	44633000	9935400	97931000	1	81107000	34112000	101190000	36560000	36237000	3.81357e+07	57841200	0.659317	0.398654
tr|G3XAM7|G3XAM7_HUMANCatenin(Cadherin-associatedprotein),alpha1,102kDa,isoformCRA_aOS=HomosapiensGN=CTNNA1PE=1SV=1;sp|P35221|CTNA1_HUMANCateninalpha-1OS=HomosapiensGN=CTNNA1PE=1SV=1;tr|E5RJ41|E5RJ41_HUMANCateninalpha-1(Fragment)OS=HomosapiensGN=CTNNA1PE=1SV=1;tr|E5RIB1|E5RIB1_HUMANCateninalpha-1(Fragment)OS=HomosapiensGN=CTNNA1PE=1SV=1;tr|A0A0A0MTJ6|A0A0A0MTJ6_HUMANCateninalpha-2OS=HomosapiensGN…	1	1	1	2725000	5398300	1	1	30300000	4477400	1	1.62466e+06	6.95548e+06	0.23358	0.400092
sp|P27105|STOM_HUMANErythrocyteband7integralmembraneproteinOS=HomosapiensGN=STOMPE=1SV=3;tr|F8VSL7|F8VSL7_HUMANErythrocyteband7integralmembraneproteinOS=HomosapiensGN=STOMPE=1SV=1	138050000	79645000	3774300	74716000	32915000	106430000	8988000	485930000	96791000	30837000	65820060	145795200	0.451456	0.400132
sp|O94804|STK10_HUMANSerine/threonine-proteinkinase10OS=HomosapiensGN=STK10PE=1SV=1;tr|H0YB71|H0YB71_HUMANSerine/threonine-proteinkinase10(Fragment)OS=HomosapiensGN=STK10PE=1SV=1	9205400	8133200	1	10471000	25403000	8935200	1	15981000	5650800	1	1.06425e+07	6.1134e+06	1.74085	0.400254
tr|D6RB59|D6RB59_HUMANExocystcomplexcomponent3OS=HomosapiensGN=EXOC3PE=1SV=1;sp|O60645|EXOC3_HUMANExocystcomplexcomponent3OS=HomosapiensGN=EXOC3PE=1SV=2	1	1	2301400	1	1	1	1	12684000	878100	1	460281	2.71242e+06	0.169694	0.401254
sp|P02656|APOC3_HUMANApolipoproteinC-IIIOS=HomosapiensGN=APOC3PE=1SV=1;tr|B0YIW2|B0YIW2_HUMANApolipoproteinC-IIIOS=HomosapiensGN=APOC3PE=1SV=1	83886000	32496000	264080000	29840000	1	20295000	55759000	81269000	6968900	29108000	8.20604e+07	38679980	2.12152	0.404476
tr|H0YN07|H0YN07_HUMANImportin-4(Fragment)OS=HomosapiensGN=IPO4PE=1SV=1;tr|H0YMR4|H0YMR4_HUMANImportin-4(Fragment)OS=HomosapiensGN=IPO4PE=1SV=1;sp|Q8TEX9|IPO4_HUMANImportin-4OS=HomosapiensGN=IPO4PE=1SV=2	1	1	1	1908800	2185700	1	1	7664000	3441900	1	818901	2.22118e+06	0.368678	0.405393
tr|B7ZL14|B7ZL14_HUMANFNBP1proteinOS=HomosapiensGN=FNBP1PE=1SV=1;tr|H0Y7W6|H0Y7W6_HUMANFormin-bindingprotein1(Fragment)OS=HomosapiensGN=FNBP1PE=1SV=2;sp|Q96RU3|FNBP1_HUMANFormin-bindingprotein1OS=HomosapiensGN=FNBP1PE=1SV=2	1	1	1	1	7538700	3350000	1	16561000	2698500	1	1.50774e+06	4.5219e+06	0.333431	0.405817
sp|Q14764|MVP_HUMANMajorvaultproteinOS=HomosapiensGN=MVPPE=1SV=4;tr|H3BUK7|H3BUK7_HUMANMajorvaultprotein(Fragment)OS=HomosapiensGN=MVPPE=1SV=1;tr|H3BRL2|H3BRL2_HUMANMajorvaultprotein(Fragment)OS=HomosapiensGN=MVPPE=1SV=8;tr|H3BQK6|H3BQK6_HUMANMajorvaultprotein(Fragment)OS=HomosapiensGN=MVPPE=1SV=1;tr|H3BP76|H3BP76_HUMANMajorvaultprotein(Fragment)OS=HomosapiensGN=MVPPE=1SV=1;tr|H3BPZ2|H3BPZ2_HUMAN…	298510000	100350000	10956000	134270000	53394000	125450000	64166000	446070000	183320000	139320000	119496000	191665200	0.623462	0.408549
sp|A0A0C4DH29|HV103_HUMANImmunoglobulinheavyvariable1-3OS=HomosapiensGN=IGHV1-3PE=3SV=1;sp|P0DP01|HV108_HUMANImmunoglobulinheavyvariable1-8OS=HomosapiensGN=IGHV1-8PE=3SV=1;sp|P01743|HV146_HUMANImmunoglobulinheavyvariable1-46OS=HomosapiensGN=IGHV1-46PE=1SV=2;sp|A0A0B4J2H0|HV69D_HUMANImmunoglobulinheavyvariable1-69DOS=HomosapiensGN=IGHV1-69DPE=3SV=1	1	21547000	7041400	1	1	1	1	9660200	121300000	2554500	5.71768e+06	2.67029e+07	0.214122	0.408916
sp|P14866|HNRPL_HUMANHeterogeneousnuclearribonucleoproteinLOS=HomosapiensGN=HNRNPLPE=1SV=2;tr|M0QYT0|M0QYT0_HUMANUncharacterizedprotein(Fragment)OS=HomosapiensPE=1SV=1;tr|M0QXS5|M0QXS5_HUMANHeterogeneousnuclearribonucleoproteinL(Fragment)OS=HomosapiensGN=HNRNPLPE=1SV=1;tr|M0R076|M0R076_HUMANUncharacterizedprotein(Fragment)OS=HomosapiensPE=1SV=1	1	1	1	4209000	1	6259200	1	1	4033100	536940	841801	2.16585e+06	0.38867	0.410256
tr|H0Y300|H0Y300_HUMANHaptoglobinOS=HomosapiensGN=HPPE=1SV=4	1	1	9184200	1	1	552420	1	1	632160	1	1.83684e+06	236917	7.75311	0.410523
sp|P51812|KS6A3_HUMANRibosomalproteinS6kinasealpha-3OS=HomosapiensGN=RPS6KA3PE=1SV=1;sp|Q9UK32|KS6A6_HUMANRibosomalproteinS6kinasealpha-6OS=HomosapiensGN=RPS6KA6PE=1SV=1;tr|B1AXG2|B1AXG2_HUMANRibosomalproteinS6kinasealpha-3(Fragment)OS=HomosapiensGN=RPS6KA3PE=1SV=1;tr|E9PAN7|E9PAN7_HUMANRibosomalproteinS6kinasealpha-1OS=HomosapiensGN=RPS6KA1PE=1SV=1;tr|B1AXG1|B1AXG1_HUMANRibosomalproteinS6kinasea…	1	1	67978000	16649000	1	1	1	19362000	5912200	1	1.69254e+07	5.05484e+06	3.34835	0.411118
sp|P68036|UB2L3_HUMANUbiquitin-conjugatingenzymeE2L3OS=HomosapiensGN=UBE2L3PE=1SV=1	14746000	1	46530000	1	13551000	14886000	1	1	18860000	1	1.49654e+07	6.7492e+06	2.21736	0.411156
sp|P46777|RL5_HUMAN60SribosomalproteinL5OS=HomosapiensGN=RPL5PE=1SV=3;tr|Q5T7N0|Q5T7N0_HUMAN60SribosomalproteinL5(Fragment)OS=HomosapiensGN=RPL5PE=1SV=2	1	1	9528300	4038100	1	1	1	1	3470500	1464300	2.71328e+06	986961	2.74913	0.412065
tr|A0A0G2JMB2|A0A0G2JMB2_HUMANImmunoglobulinheavyconstantalpha2(Fragment)OS=HomosapiensGN=IGHA2PE=1SV=1;sp|P01877|IGHA2_HUMANImmunoglobulinheavyconstantalpha2OS=HomosapiensGN=IGHA2PE=1SV=4	23946000	23786000	22774000	31713000	1	543910	1	29275000	7667600	427580000	2.04438e+07	9.30133e+07	0.219794	0.412682
sp|O95782|AP2A1_HUMANAP-2complexsubunitalpha-1OS=HomosapiensGN=AP2A1PE=1SV=3;tr|E9PPZ3|E9PPZ3_HUMANAP-2complexsubunitalpha-2(Fragment)OS=HomosapiensGN=AP2A2PE=4SV=1;tr|E9PS94|E9PS94_HUMANAP-2complexsubunitalpha-2(Fragment)OS=HomosapiensGN=AP2A2PE=4SV=1;tr|E9PQP4|E9PQP4_HUMANAP-2complexsubunitalpha-2(Fragment)OS=HomosapiensGN=AP2A2PE=1SV=1;tr|E9PPY8|E9PPY8_HUMANAP-2complexsubunitalpha-2(Fragment)O…	504840	721690	75581000	424690	1	1	1	8541000	3472300	1	1.54464e+07	2.40266e+06	6.42889	0.413635
sp|P68366|TBA4A_HUMANTubulinalpha-4AchainOS=HomosapiensGN=TUBA4APE=1SV=1;tr|C9JEV8|C9JEV8_HUMANTubulinalphachain(Fragment)OS=HomosapiensGN=TUBA4APE=1SV=1;tr|C9JQ00|C9JQ00_HUMANTubulinalphachain(Fragment)OS=HomosapiensGN=TUBA4APE=1SV=1;tr|C9JJQ8|C9JJQ8_HUMANTubulinalphachain(Fragment)OS=HomosapiensGN=TUBA4APE=1SV=1;tr|C9JDS9|C9JDS9_HUMANTubulinalpha-4Achain(Fragment)OS=HomosapiensGN=TUBA4APE=1SV=1…	77225000	3385100	3026500	1589100	1	6861100	7767700	1812600	2978300	654210	1.70451e+07	4014782	4.2456	0.413946
sp|P30041|PRDX6_HUMANPeroxiredoxin-6OS=HomosapiensGN=PRDX6PE=1SV=3	49135000	92096000	6633800	276370000	119730000	75092000	34161000	49142000	108470000	72141000	108792960	67801200	1.60459	0.416008
tr|E9PN17|E9PN17_HUMANATPsynthasesubunitg,mitochondrialOS=HomosapiensGN=ATP5LPE=1SV=1;sp|O75964|ATP5L_HUMANATPsynthasesubunitg,mitochondrialOS=HomosapiensGN=ATP5LPE=1SV=3	4630900	14323000	1	22194000	1	1	1	1	17296000	1	8.22958e+06	3.4592e+06	2.37904	0.416438
sp|Q12929|EPS8_HUMANEpidermalgrowthfactorreceptorkinasesubstrate8OS=HomosapiensGN=EPS8PE=1SV=1;tr|F5H1B5|F5H1B5_HUMANEpidermalgrowthfactorreceptorkinasesubstrate8(Fragment)OS=HomosapiensGN=EPS8PE=1SV=1;tr|F5H2B8|F5H2B8_HUMANEpidermalgrowthfactorreceptorkinasesubstrate8(Fragment)OS=HomosapiensGN=EPS8PE=1SV=1;tr|F5GYM8|F5GYM8_HUMANEpidermalgrowthfactorreceptorkinasesubstrate8(Fragment)OS=Homosapien…	1900800	1	1	1769800	1	1	743330	20121000	1	1	734121	4.17287e+06	0.175927	0.416643
sp|P08697|A2AP_HUMANAlpha-2-antiplasminOS=HomosapiensGN=SERPINF2PE=1SV=3;tr|A0A0G2JPA8|A0A0G2JPA8_HUMANAlpha-2-antiplasminOS=HomosapiensGN=SERPINF2PE=1SV=1;tr|C9JMH6|C9JMH6_HUMANAlpha-2-antiplasmin(Fragment)OS=HomosapiensGN=SERPINF2PE=1SV=1;tr|A0A0J9YY65|A0A0J9YY65_HUMANAlpha-2-antiplasmin(Fragment)OS=HomosapiensGN=SERPINF2PE=1SV=1;tr|C9JPV4|C9JPV4_HUMANAlpha-2-antiplasmin(Fragment)OS=Homosapiens…	27121000	16941000	42592000	15192000	1	8127100	15040000	67197000	68865000	9788600	2.03692e+07	33803540	0.602576	0.41686
sp|Q04917|1433F_HUMAN14-3-3proteinetaOS=HomosapiensGN=YWHAHPE=1SV=4;tr|A2IDB2|A2IDB2_HUMAN14-3-3proteineta(Fragment)OS=HomosapiensGN=YWHAHPE=1SV=1;tr|F8WEB6|F8WEB6_HUMAN14-3-3proteinetaOS=HomosapiensGN=YWHAHPE=1SV=1;tr|A2IDB1|A2IDB1_HUMAN14-3-3proteinetaOS=HomosapiensGN=YWHAHPE=1SV=1	59845000	36828000	8135600	62162000	1	65670000	1	91323000	89434000	17653000	3.33941e+07	5.2816e+07	0.632273	0.417139
sp|P62805|H4_HUMANHistoneH4OS=HomosapiensGN=HIST1H4APE=1SV=2	1307100000	677520000	779480000	615150000	1	450250000	323850000	12710000000	135270000	391310000	6.7585e+08	2802136000	0.241191	0.417313
sp|O60749|SNX2_HUMANSortingnexin-2OS=HomosapiensGN=SNX2PE=1SV=2;tr|D6RC15|D6RC15_HUMANSortingnexin-2(Fragment)OS=HomosapiensGN=SNX2PE=1SV=8	1	9691500	28589000	1	1	26660000	1	7796400	23369000	12211000	7.6561e+06	1.40073e+07	0.54658	0.417486
sp|P16401|H15_HUMANHistoneH1.5OS=HomosapiensGN=HIST1H1BPE=1SV=3	67891000	1	1	1813000	1	6434200	1	4869700	621730	1	1.39408e+07	2.38513e+06	5.84489	0.418909
sp|Q86XW9|TXND6_HUMANThioredoxindomain-containingprotein6OS=HomosapiensGN=NME9PE=2SV=1;tr|C9JXP5|C9JXP5_HUMANThioredoxindomain-containingprotein6(Fragment)OS=HomosapiensGN=NME9PE=1SV=1	6242900	5424600	1	4611700	1	1	7623200	1	1	1	3.25584e+06	1.52464e+06	2.13548	0.420551
sp|P40227|TCPZ_HUMANT-complexprotein1subunitzetaOS=HomosapiensGN=CCT6APE=1SV=3;sp|Q92526|TCPW_HUMANT-complexprotein1subunitzeta-2OS=HomosapiensGN=CCT6BPE=1SV=5;tr|J3KRI6|J3KRI6_HUMANT-complexprotein1subunitzeta-2(Fragment)OS=HomosapiensGN=CCT6BPE=1SV=1	11330000	5746300	3787600	12475000	1	1219400	1	27369000	45118000	1	6.66778e+06	1.47413e+07	0.45232	0.420576
sp|Q02790|FKBP4_HUMANPeptidyl-prolylcis-transisomeraseFKBP4OS=HomosapiensGN=FKBP4PE=1SV=3;tr|H0YFG2|H0YFG2_HUMANPeptidyl-prolylcis-transisomeraseFKBP4(Fragment)OS=HomosapiensGN=FKBP4PE=1SV=1	3190500	10379000	5630200	8950300	1	5564400	1	4955500	6619300	1336900	5.63e+06	3.69522e+06	1.52359	0.421002
sp|Q9NZT1|CALL5_HUMANCalmodulin-likeprotein5OS=HomosapiensGN=CALML5PE=1SV=2	1	1	1	1	6572300	23203000	1	1	836150	2350000	1.31446e+06	5.27783e+06	0.249053	0.422603
sp|Q08J23|NSUN2_HUMANtRNA(cytosine(34)-C(5))-methyltransferaseOS=HomosapiensGN=NSUN2PE=1SV=2;tr|A0A140T9Y7|A0A140T9Y7_HUMANtRNA(cytosine(34)-C(5))-methyltransferaseOS=HomosapiensGN=NSUN2PE=1SV=1	8275300	1	1	1	1	7690700	1	10401000	1595500	1	1.65506e+06	3.93744e+06	0.420339	0.424524
sp|P61158|ARP3_HUMANActin-relatedprotein3OS=HomosapiensGN=ACTR3PE=1SV=3;tr|B4DXW1|B4DXW1_HUMANActin-relatedprotein3OS=HomosapiensGN=ACTR3PE=1SV=1;tr|F8WDR7|F8WDR7_HUMANActin-relatedprotein3(Fragment)OS=HomosapiensGN=ACTR3PE=1SV=2;sp|Q9P1U1|ARP3B_HUMANActin-relatedprotein3BOS=HomosapiensGN=ACTR3BPE=2SV=1;tr|F8WEW2|F8WEW2_HUMANActin-relatedprotein3OS=HomosapiensGN=ACTR3PE=1SV=1;tr|F8WE84|F8WE84_HUM…	104140000	49346000	12575000	106330000	1	78789000	39892000	375300000	39731000	31464000	5.44782e+07	113035200	0.481958	0.425404
tr|X6RLJ0|X6RLJ0_HUMANComplementC1qsubcomponentsubunitA(Fragment)OS=HomosapiensGN=C1QAPE=1SV=7;sp|P02745|C1QA_HUMANComplementC1qsubcomponentsubunitAOS=HomosapiensGN=C1QAPE=1SV=2	21816000	1	760820000	20312000	1	46867000	1	100590000	3665600	16779000	1.6059e+08	3.35803e+07	4.78225	0.425553
sp|P05091|ALDH2_HUMANAldehydedehydrogenase,mitochondrialOS=HomosapiensGN=ALDH2PE=1SV=2;tr|F8VP50|F8VP50_HUMANUncharacterizedprotein(Fragment)OS=HomosapiensPE=4SV=3;tr|S4R3S4|S4R3S4_HUMANAldehydedehydrogenase,mitochondrial(Fragment)OS=HomosapiensGN=ALDH2PE=1SV=1;tr|H0YMG7|H0YMG7_HUMANRetinaldehydrogenase2OS=HomosapiensGN=ALDH1A2PE=1SV=1;sp|O94788|AL1A2_HUMANRetinaldehydrogenase2OS=HomosapiensGN=AL…	10716000	20898000	1861200	272130000	1	25204000	3288300	7066100	35991000	12312000	6.1121e+07	16772280	3.64417	0.428924
sp|P02749|APOH_HUMANBeta-2-glycoprotein1OS=HomosapiensGN=APOHPE=1SV=3;tr|J3KS17|J3KS17_HUMANBeta-2-glycoprotein1(Fragment)OS=HomosapiensGN=APOHPE=1SV=1;tr|J3QRN2|J3QRN2_HUMANBeta-2-glycoprotein1(Fragment)OS=HomosapiensGN=APOHPE=1SV=1;tr|J3QLI0|J3QLI0_HUMANBeta-2-glycoprotein1(Fragment)OS=HomosapiensGN=APOHPE=1SV=1;CON__P17690	1	1	409940000	2117200	1	6182400	1	36526000	21000000	6227200	8.24114e+07	1.39871e+07	5.89195	0.429051
tr|A0A0B4J2B5|A0A0B4J2B5_HUMANImmunoglobulinheavyvariable3/OR16-9(non-functional)(Fragment)OS=HomosapiensGN=IGHV3OR16-9PE=1SV=1;tr|A0A075B7F0|A0A075B7F0_HUMANImmunoglobulinheavyvariable3/OR16-10(non-functional)(Fragment)OS=HomosapiensGN=IGHV3OR16-10PE=1SV=1;sp|A0A0C4DH32|HV320_HUMANImmunoglobulinheavyvariable3-20OS=HomosapiensGN=IGHV3-20PE=3SV=2	78026000	47586000	381130000	75419000	1	19037000	20250000	12129000	61525000	163940000	1.16432e+08	55376200	2.10257	0.429668
sp|P01780|HV307_HUMANImmunoglobulinheavyvariable3-7OS=HomosapiensGN=IGHV3-7PE=1SV=2;sp|P01763|HV348_HUMANImmunoglobulinheavyvariable3-48OS=HomosapiensGN=IGHV3-48PE=1SV=2;sp|P01762|HV311_HUMANImmunoglobulinheavyvariable3-11OS=HomosapiensGN=IGHV3-11PE=1SV=2;sp|A0A0B4J1V1|HV321_HUMANImmunoglobulinheavyvariable3-21OS=HomosapiensGN=IGHV3-21PE=1SV=1	2110000	1	48742000	1	1	2128700	1	1	1	8107900	1.01704e+07	2.04732e+06	4.96766	0.430229
sp|P62937|PPIA_HUMANPeptidyl-prolylcis-transisomeraseAOS=HomosapiensGN=PPIAPE=1SV=2;tr|F8WE65|F8WE65_HUMANPeptidyl-prolylcis-transisomeraseOS=HomosapiensGN=PPIAPE=1SV=1;tr|C9J5S7|C9J5S7_HUMANPeptidyl-prolylcis-transisomeraseOS=HomosapiensGN=PPIAPE=1SV=1;tr|E5RIZ5|E5RIZ5_HUMANPeptidyl-prolylcis-transisomeraseAOS=HomosapiensGN=PPIAPE=1SV=1;tr|A0A0H2UH34|A0A0H2UH34_HUMANPeptidyl-prolylcis-transisome…	27626000	98443000	15050000	150030000	1	9424900	13486000	4620600	103240000	21508000	5.82298e+07	30455900	1.91194	0.436609
sp|Q9NPP4|NLRC4_HUMANNLRfamilyCARDdomain-containingprotein4OS=HomosapiensGN=NLRC4PE=1SV=2	1	10168000	3243400	1	1	5121600	1	30303000	2164700	618830	2.68228e+06	7.64163e+06	0.351009	0.437158
sp|Q14376|GALE_HUMANUDP-glucose4-epimeraseOS=HomosapiensGN=GALEPE=1SV=2;tr|Q5QPP1|Q5QPP1_HUMANUDP-glucose4-epimerase(Fragment)OS=HomosapiensGN=GALEPE=1SV=1;tr|Q5QPP9|Q5QPP9_HUMANUDP-glucose4-epimerase(Fragment)OS=HomosapiensGN=GALEPE=1SV=1;tr|Q5QPP3|Q5QPP3_HUMANUDP-glucose4-epimerase(Fragment)OS=HomosapiensGN=GALEPE=1SV=1;tr|Q5QPP4|Q5QPP4_HUMANUDP-glucose4-epimerase(Fragment)OS=HomosapiensGN=GALE…	1	20754000	13280000	2878800	1	5784400	2133100	67021000	9671000	5386800	7.38256e+06	17999260	0.410159	0.437456
sp|A0A075B6J9|LV218_HUMANImmunoglobulinlambdavariable2-18OS=HomosapiensGN=IGLV2-18PE=3SV=2	1	1	10885000	1	1	1	1	1	1906900	1	2.177e+06	381381	5.70821	0.440043
sp|P34932|HSP74_HUMANHeatshock70kDaprotein4OS=HomosapiensGN=HSPA4PE=1SV=4;tr|A0A087WTS8|A0A087WTS8_HUMANHeatshock70kDaprotein4OS=HomosapiensGN=HSPA4PE=1SV=1;tr|A0A087WYC1|A0A087WYC1_HUMANHeatshock70kDaprotein4OS=HomosapiensGN=HSPA4PE=1SV=1	1	9761900	1	28755000	1	1	1	1	13374000	1	7.70338e+06	2.6748e+06	2.87998	0.440712
sp|O14745|NHRF1_HUMANNa(+)/H(+)exchangeregulatorycofactorNHE-RF1OS=HomosapiensGN=SLC9A3R1PE=1SV=4;tr|J3QRP6|J3QRP6_HUMANNa(+)/H(+)exchangeregulatorycofactorNHE-RF1(Fragment)OS=HomosapiensGN=SLC9A3R1PE=1SV=1	1	1	32453000	1	18595000	18182000	1	74906000	11928000	6857400	1.02096e+07	2.23747e+07	0.456302	0.441087
sp|Q00722|PLCB2_HUMAN1-phosphatidylinositol4,5-bisphosphatephosphodiesterasebeta-2OS=HomosapiensGN=PLCB2PE=1SV=2	6363300	1	1	1	1	1	1	1	1128800	1	1.27266e+06	225761	5.63721	0.441386
sp|Q07954|LRP1_HUMANProlow-densitylipoproteinreceptor-relatedprotein1OS=HomosapiensGN=LRP1PE=1SV=2;tr|Q6PJ72|Q6PJ72_HUMANLRP1proteinOS=HomosapiensGN=LRP1PE=1SV=1	7388500	13873000	69662000	22181000	14682000	17458000	32089000	2782500	11682000	14188000	25557300	15639900	1.63411	0.44139
sp|P07900|HS90A_HUMANHeatshockproteinHSP90-alphaOS=HomosapiensGN=HSP90AA1PE=1SV=5;tr|G3V2J8|G3V2J8_HUMANHeatshockproteinHSP90-alpha(Fragment)OS=HomosapiensGN=HSP90AA1PE=1SV=1;sp|Q14568|HS902_HUMANHeatshockproteinHSP90-alphaA2OS=HomosapiensGN=HSP90AA2PPE=1SV=2;sp|Q58FG0|HS905_HUMANPutativeheatshockproteinHSP90-alphaA5OS=HomosapiensGN=HSP90AA5PPE=2SV=1;sp|Q58FF6|H90B4_HUMANPutativeheatshockproteinH…	1310600000	1390000000	211070000	2401500000	29631000	675360000	437670000	520100000	1178700000	709590000	1068560200	704284000	1.51723	0.443484
tr|H7BZK2|H7BZK2_HUMANTransientreceptorpotentialcationchannelsubfamilyVmember2(Fragment)OS=HomosapiensGN=TRPV2PE=1SV=1;sp|Q9Y5S1|TRPV2_HUMANTransientreceptorpotentialcationchannelsubfamilyVmember2OS=HomosapiensGN=TRPV2PE=1SV=1	1	5169500	1	6484700	1	1	1	4711600	1	1	2.33084e+06	942321	2.47351	0.443593
tr|C9K025|C9K025_HUMAN60SribosomalproteinL35a(Fragment)OS=HomosapiensGN=RPL35APE=1SV=1;sp|P18077|RL35A_HUMAN60SribosomalproteinL35aOS=HomosapiensGN=RPL35APE=1SV=2;tr|F8WBS5|F8WBS5_HUMAN60SribosomalproteinL35aOS=HomosapiensGN=RPL35APE=1SV=1;tr|F8WB72|F8WB72_HUMAN60SribosomalproteinL35aOS=HomosapiensGN=RPL35APE=1SV=1	3806000	1	2958500	1	1	4157200	1	1	8542700	1409500	1.3529e+06	2.82188e+06	0.479432	0.443817
sp|P02774|VTDB_HUMANVitaminD-bindingproteinOS=HomosapiensGN=GCPE=1SV=1;tr|D6RF35|D6RF35_HUMANVitaminD-bindingproteinOS=HomosapiensGN=GCPE=1SV=1;tr|D6RBJ7|D6RBJ7_HUMANVitaminD-bindingproteinOS=HomosapiensGN=GCPE=1SV=1;tr|D6RF20|D6RF20_HUMANVitaminD-bindingprotein(Fragment)OS=HomosapiensGN=GCPE=1SV=1;CON__Q3MHN5;CON__ENSEMBL:ENSBTAP00000018229	25463000	8210000	269320000	7319200	1	19440000	1	63083000	6823400	7132900	6.20624e+07	1.92959e+07	3.21636	0.444817
sp|P02765|FETUA_HUMANAlpha-2-HS-glycoproteinOS=HomosapiensGN=AHSGPE=1SV=1;tr|C9JV77|C9JV77_HUMANAlpha-2-HS-glycoproteinOS=HomosapiensGN=AHSGPE=1SV=1;CON__P12763	112710000	100770000	384890000	59515000	1	138490000	109610000	8039000	72778000	47431000	1.31577e+08	75269600	1.74808	0.445431
tr|K7EMV3|K7EMV3_HUMANHistoneH3OS=HomosapiensGN=H3F3BPE=1SV=1;tr|B4DEB1|B4DEB1_HUMANHistoneH3OS=HomosapiensGN=H3F3APE=1SV=1;tr|K7EK07|K7EK07_HUMANHistoneH3(Fragment)OS=HomosapiensGN=H3F3BPE=1SV=1;sp|Q71DI3|H32_HUMANHistoneH3.2OS=HomosapiensGN=HIST2H3APE=1SV=3;sp|Q16695|H31T_HUMANHistoneH3.1tOS=HomosapiensGN=HIST3H3PE=1SV=3;sp|P84243|H33_HUMANHistoneH3.3OS=HomosapiensGN=H3F3APE=1SV=2;sp|P68431|H31…	1652700000	935820000	446940000	2077400000	203550000	44607000	51681000	2640900000	61180000	857070	1063282000	559845014	1.89924	0.446992
sp|Q0VD83|APOBR_HUMANApolipoproteinBreceptorOS=HomosapiensGN=APOBRPE=1SV=2	1	1	1	3735600	1	1	721890	1	1	1	747121	144379	5.17473	0.451149
sp|P18669|PGAM1_HUMANPhosphoglyceratemutase1OS=HomosapiensGN=PGAM1PE=1SV=2;sp|P15259|PGAM2_HUMANPhosphoglyceratemutase2OS=HomosapiensGN=PGAM2PE=1SV=3;sp|Q8N0Y7|PGAM4_HUMANProbablephosphoglyceratemutase4OS=HomosapiensGN=PGAM4PE=3SV=1	39036000	50750000	8165900	76288000	1	86707000	25730000	2073900	104730000	48178000	3.4848e+07	53483780	0.651562	0.451442
sp|P17066|HSP76_HUMANHeatshock70kDaprotein6OS=HomosapiensGN=HSPA6PE=1SV=2;sp|P48741|HSP77_HUMANPutativeheatshock70kDaprotein7OS=HomosapiensGN=HSPA7PE=5SV=2	9420100	69105000	10286000	62352000	1	8856700	22344000	40470000	349860000	1	3.02326e+07	8.43061e+07	0.358605	0.451529
sp|P19827|ITIH1_HUMANInter-alpha-trypsininhibitorheavychainH1OS=HomosapiensGN=ITIH1PE=1SV=3;tr|F8WAS2|F8WAS2_HUMANInter-alpha-trypsininhibitorheavychainH1OS=HomosapiensGN=ITIH1PE=1SV=1;tr|H7C0N0|H7C0N0_HUMANInter-alpha-trypsininhibitorheavychainH1(Fragment)OS=HomosapiensGN=ITIH1PE=1SV=1;CON__Q0VCM5;tr|H7C5I0|H7C5I0_HUMANInter-alpha-trypsininhibitorheavychainH1(Fragment)OS=HomosapiensGN=ITIH1PE=1S…	2488800	1021500	384020000	1195900	1	5566600	10595000	51510000	1939600	14581000	7.77452e+07	16838440	4.61713	0.452259
sp|P01024|CO3_HUMANComplementC3OS=HomosapiensGN=C3PE=1SV=2;tr|M0QYC8|M0QYC8_HUMANComplementC3(Fragment)OS=HomosapiensGN=C3PE=1SV=1;CON__Q2UVX4;tr|M0QXZ3|M0QXZ3_HUMANComplementC3(Fragment)OS=HomosapiensGN=C3PE=1SV=1;tr|M0R1Q1|M0R1Q1_HUMANComplementC3(Fragment)OS=HomosapiensGN=C3PE=1SV=1;tr|M0R0Q9|M0R0Q9_HUMANComplementC3(Fragment)OS=HomosapiensGN=C3PE=1SV=1;sp|O95568|MET18_HUMANHistidineproteinmet…	1669000000	6776400000	12424000000	5489100000	105940000	5717900000	6615200000	1727700000	7688700000	18547000000	5292888000	8059300000	0.656743	0.457271
sp|P49913|CAMP_HUMANCathelicidinantimicrobialpeptideOS=HomosapiensGN=CAMPPE=1SV=1;tr|J3KNB4|J3KNB4_HUMANCathelicidinantimicrobialpeptideOS=HomosapiensGN=CAMPPE=1SV=1	103280000	25857000	6157000	15805000	542410000	15016000	3447600	2628500000	92727000	14631000	138701800	550864320	0.251789	0.458853
sp|P01599|KV117_HUMANImmunoglobulinkappavariable1-17OS=HomosapiensGN=IGKV1-17PE=1SV=2;sp|A0A0C4DH72|KV106_HUMANImmunoglobulinkappavariable1-6OS=HomosapiensGN=IGKV1-6PE=3SV=1	1	8696400	77709000	1	1	1	1	1	13282000	13101000	1.72811e+07	5.2766e+06	3.27504	0.462041
sp|P21695|GPDA_HUMANGlycerol-3-phosphatedehydrogenase[NAD(+)],cytoplasmicOS=HomosapiensGN=GPD1PE=1SV=4	10669000	54124000	16331000	182700000	44725000	114060000	9573400	27609000	362650000	69749000	61709800	116728280	0.528662	0.462699
sp|P62851|RS25_HUMAN40SribosomalproteinS25OS=HomosapiensGN=RPS25PE=1SV=1	11240000	1	1	3758600	1	1	1	1	5551000	1	2.99972e+06	1.1102e+06	2.70196	0.462871
tr|H3BNE1|H3BNE1_HUMANSynaptosomal-associatedprotein23OS=HomosapiensGN=SNAP23PE=1SV=1;tr|H3BR18|H3BR18_HUMANSynaptosomal-associatedprotein(Fragment)OS=HomosapiensGN=SNAP23PE=1SV=1;tr|H3BM38|H3BM38_HUMANSynaptosomal-associatedprotein(Fragment)OS=HomosapiensGN=SNAP23PE=1SV=1;tr|H3BPJ0|H3BPJ0_HUMANSynaptosomal-associatedprotein23OS=HomosapiensGN=SNAP23PE=1SV=1;sp|O00161|SNP23_HUMANSynaptosomal-assoc…	20727000	20232000	1	107850000	13123000	31218000	1	36851000	3811400	10782000	3.23864e+07	1.65325e+07	1.95896	0.463849
tr|K7EKM4|K7EKM4_HUMANSpermidinesynthaseOS=HomosapiensGN=SRMPE=1SV=1;sp|P19623|SPEE_HUMANSpermidinesynthaseOS=HomosapiensGN=SRMPE=1SV=1	1	1	1	1	6891800	1	1	613450	925480	1	1.37836e+06	307787	4.4783	0.463957
sp|Q92625|ANS1A_HUMANAnkyrinrepeatandSAMdomain-containingprotein1AOS=HomosapiensGN=ANKS1APE=1SV=4	1	1	1	1	5838600	1	1	1	1256200	1	1.16772e+06	251241	4.64782	0.464951
sp|Q14019|COTL1_HUMANCoactosin-likeproteinOS=HomosapiensGN=COTL1PE=1SV=3;tr|H3BT58|H3BT58_HUMANCoactosin-likeproteinOS=HomosapiensGN=COTL1PE=1SV=1	58953000	38096000	7895200	255710000	22064000	24731000	19293000	25504000	100230000	28962000	76543640	39744000	1.92592	0.465818
sp|P43034|LIS1_HUMANPlatelet-activatingfactoracetylhydrolaseIBsubunitalphaOS=HomosapiensGN=PAFAH1B1PE=1SV=2;tr|I3L3N5|I3L3N5_HUMANPlatelet-activatingfactoracetylhydrolaseIBsubunitalpha(Fragment)OS=HomosapiensGN=PAFAH1B1PE=1SV=1	1	1	1	1	27309000	15721000	31796000	6988200	2927200	1	5.4618e+06	1.14865e+07	0.475498	0.468313
tr|G3V1Q4|G3V1Q4_HUMANSeptin-7OS=HomosapiensGN=SEPT7PE=1SV=2;tr|E7ES33|E7ES33_HUMANSeptin-7OS=HomosapiensGN=SEPT7PE=1SV=3;tr|E7EPK1|E7EPK1_HUMANSeptin-7OS=HomosapiensGN=SEPT7PE=1SV=2;sp|Q16181|SEPT7_HUMANSeptin-7OS=HomosapiensGN=SEPT7PE=1SV=2;tr|A0A0U1RRE1|A0A0U1RRE1_HUMANSeptin-7(Fragment)OS=HomosapiensGN=SEPT7PE=1SV=1;tr|Q5JXL7|Q5JXL7_HUMANSeptin-7OS=HomosapiensGN=DKFZp586I031PE=1SV=1;tr|A0A0U1…	28492000	4174900	1	18982000	1	9709700	8671200	1246600	5618700	3827600	1.03298e+07	5814760	1.77648	0.468551
sp|P02751|FINC_HUMANFibronectinOS=HomosapiensGN=FN1PE=1SV=4;tr|H0Y7Z1|H0Y7Z1_HUMANFibronectin(Fragment)OS=HomosapiensGN=FN1PE=1SV=1	30648000	25271000	3844600000	66542000	7212300	379000000	22314000	366300000	173100000	122110000	794854660	212564800	3.73935	0.468782
sp|Q14204|DYHC1_HUMANCytoplasmicdynein1heavychain1OS=HomosapiensGN=DYNC1H1PE=1SV=5;tr|H0YJ21|H0YJ21_HUMANCytoplasmicdynein1heavychain1(Fragment)OS=HomosapiensGN=DYNC1H1PE=1SV=1	162940000	47914000	16996000	168000000	14533000	206190000	11073000	305160000	129990000	10305000	82076600	132543600	0.619242	0.470563
sp|P84095|RHOG_HUMANRho-relatedGTP-bindingproteinRhoGOS=HomosapiensGN=RHOGPE=1SV=1	98470000	30221000	7056600	35824000	1	10919000	23297000	30621000	16866000	22800000	3.43143e+07	20900600	1.64179	0.470602
sp|P08311|CATG_HUMANCathepsinGOS=HomosapiensGN=CTSGPE=1SV=2	110830000	25477000	5531200	30250000	495620000	22258000	67806000	1772000000	117730000	30272000	133541640	402013200	0.332182	0.471314
sp|P07195|LDHB_HUMANL-lactatedehydrogenaseBchainOS=HomosapiensGN=LDHBPE=1SV=2;tr|A8MW50|A8MW50_HUMANL-lactatedehydrogenase(Fragment)OS=HomosapiensGN=LDHBPE=1SV=1;tr|C9J7H8|C9J7H8_HUMANL-lactatedehydrogenaseBchain(Fragment)OS=HomosapiensGN=LDHBPE=1SV=8;tr|F5H793|F5H793_HUMANL-lactatedehydrogenaseBchain(Fragment)OS=HomosapiensGN=LDHBPE=1SV=1;tr|F5H5G7|F5H5G7_HUMANL-lactatedehydrogenaseOS=Homosapien…	228620000	761620000	38392000	692980000	14767000	144180000	217330000	175380000	352520000	229170000	347275800	223716000	1.55231	0.47225
sp|Q99879|H2B1M_HUMANHistoneH2Btype1-MOS=HomosapiensGN=HIST1H2BMPE=1SV=3;sp|Q99877|H2B1N_HUMANHistoneH2Btype1-NOS=HomosapiensGN=HIST1H2BNPE=1SV=3;sp|Q93079|H2B1H_HUMANHistoneH2Btype1-HOS=HomosapiensGN=HIST1H2BHPE=1SV=3;sp|Q5QNW6|H2B2F_HUMANHistoneH2Btype2-FOS=HomosapiensGN=HIST2H2BFPE=1SV=3;sp|P62807|H2B1C_HUMANHistoneH2Btype1-C/E/F/G/IOS=HomosapiensGN=HIST1H2BCPE=1SV=4;sp|P58876|H2B1D_HUMANHisto…	111340000	169770000	33609000	286690000	1225200000	293800000	82575000	4115600000	218580000	186020000	365321800	979315000	0.373038	0.472691
tr|D6RG15|D6RG15_HUMANTwinfilin-2OS=HomosapiensGN=TWF2PE=1SV=1;sp|Q6IBS0|TWF2_HUMANTwinfilin-2OS=HomosapiensGN=TWF2PE=1SV=2;tr|F8W645|F8W645_HUMANTwinfilin-1(Fragment)OS=HomosapiensGN=TWF1PE=1SV=1;tr|F8W1Q9|F8W1Q9_HUMANTwinfilin-1(Fragment)OS=HomosapiensGN=TWF1PE=1SV=8;tr|H0Y858|H0Y858_HUMANUncharacterizedprotein(Fragment)OS=HomosapiensPE=4SV=1	1	5312000	1	2782400	1	1	1	8388900	8452200	1	1.61888e+06	3.36822e+06	0.480634	0.473029
sp|P22314|UBA1_HUMANUbiquitin-likemodifier-activatingenzyme1OS=HomosapiensGN=UBA1PE=1SV=3;tr|Q5JRR6|Q5JRR6_HUMANUbiquitin-likemodifier-activatingenzyme1OS=HomosapiensGN=UBA1PE=1SV=1;tr|Q5JRR9|Q5JRR9_HUMANUbiquitin-likemodifier-activatingenzyme1(Fragment)OS=HomosapiensGN=UBA1PE=1SV=8;tr|Q5JRS0|Q5JRS0_HUMANUbiquitin-likemodifier-activatingenzyme1(Fragment)OS=HomosapiensGN=UBA1PE=1SV=1;tr|Q5JRS1|Q5J…	22432000	22721000	5903400	110670000	10101000	22002000	25178000	69622000	56814000	84408000	34365480	51604800	0.665936	0.473409
sp|Q06830|PRDX1_HUMANPeroxiredoxin-1OS=HomosapiensGN=PRDX1PE=1SV=1;tr|A0A0A0MSI0|A0A0A0MSI0_HUMANPeroxiredoxin-1(Fragment)OS=HomosapiensGN=PRDX1PE=1SV=1;tr|A0A0A0MRQ5|A0A0A0MRQ5_HUMANPeroxiredoxin-1OS=HomosapiensGN=PRDX1PE=1SV=1	81733000	599430000	109640000	316910000	278270000	204800000	66664000	130970000	470550000	64715000	277196600	187539800	1.47807	0.474114
sp|P10606|COX5B_HUMANCytochromecoxidasesubunit5B,mitochondrialOS=HomosapiensGN=COX5BPE=1SV=2	1	1	1	1	7116100	1	1	1	1637000	1	1.42322e+06	327401	4.34703	0.474526
sp|Q13938|CAYP1_HUMANCalcyphosinOS=HomosapiensGN=CAPSPE=1SV=1;tr|K7EL21|K7EL21_HUMANCalcyphosinOS=HomosapiensGN=CAPSPE=1SV=1;tr|K7ES72|K7ES72_HUMANCalcyphosin(Fragment)OS=HomosapiensGN=CAPSPE=1SV=2;tr|A0A0X1KG78|A0A0X1KG78_HUMANCalcyphosinOS=HomosapiensGN=CAPSPE=1SV=1	111370000	262740000	1	117630000	154020000	151930000	146510000	14402000	68603000	79129000	1.29152e+08	92114800	1.40208	0.475244
sp|Q9Y4E8|UBP15_HUMANUbiquitincarboxyl-terminalhydrolase15OS=HomosapiensGN=USP15PE=1SV=3;tr|F8VVY7|F8VVY7_HUMANUbiquitincarboxyl-terminalhydrolase15(Fragment)OS=HomosapiensGN=USP15PE=1SV=1;tr|F8VZG8|F8VZG8_HUMANUbiquitincarboxyl-terminalhydrolase15(Fragment)OS=HomosapiensGN=USP15PE=1SV=8;tr|F8W0H4|F8W0H4_HUMANUbiquitincarboxyl-terminalhydrolase15(Fragment)OS=HomosapiensGN=USP15PE=1SV=1;tr|H0YI31|…	1	1	1	1	6984900	1756000	1	9992700	3933700	1	1.39698e+06	3.13648e+06	0.445398	0.476055
sp|Q8WVY7|UBCP1_HUMANUbiquitin-likedomain-containingCTDphosphatase1OS=HomosapiensGN=UBLCP1PE=1SV=2	1	6188000	1	5940400	1	1	1	5307500	1	1	2.42568e+06	1.0615e+06	2.28514	0.476425
sp|P16152|CBR1_HUMANCarbonylreductase[NADPH]1OS=HomosapiensGN=CBR1PE=1SV=3;tr|E9PQ63|E9PQ63_HUMANCarbonylreductase[NADPH]1OS=HomosapiensGN=CBR1PE=1SV=1;tr|A8MTM1|A8MTM1_HUMANCarbonylreductase[NADPH]1OS=HomosapiensGN=CBR1PE=1SV=1	19107000	24086000	10015000	44479000	1	19667000	23985000	18434000	30045000	36055000	1.95374e+07	25637200	0.762072	0.476439
sp|Q15185|TEBP_HUMANProstaglandinEsynthase3OS=HomosapiensGN=PTGES3PE=1SV=1;tr|A0A087WYT3|A0A087WYT3_HUMANProstaglandinEsynthase3OS=HomosapiensGN=PTGES3PE=1SV=1;tr|B4DDC6|B4DDC6_HUMANProstaglandinEsynthase3OS=HomosapiensGN=PTGES3PE=1SV=1	4817300	8247800	5657100	10242000	14051000	16238000	1	7733000	64724000	1	8603040	1.7739e+07	0.484979	0.476674
tr|H0YLP6|H0YLP6_HUMAN60SribosomalproteinL28OS=HomosapiensGN=RPL28PE=1SV=1;tr|H0YMF4|H0YMF4_HUMAN60SribosomalproteinL28OS=HomosapiensGN=RPL28PE=1SV=1;sp|P46779|RL28_HUMAN60SribosomalproteinL28OS=HomosapiensGN=RPL28PE=1SV=3;tr|H0YKD8|H0YKD8_HUMAN60SribosomalproteinL28OS=HomosapiensGN=RPL28PE=1SV=1	1	1	1699500	974570	1	1	1	10849000	1	1	534815	2.1698e+06	0.246481	0.47812
sp|P01011|AACT_HUMANAlpha-1-antichymotrypsinOS=HomosapiensGN=SERPINA3PE=1SV=2;tr|G3V3A0|G3V3A0_HUMANAlpha-1-antichymotrypsinOS=HomosapiensGN=SERPINA3PE=1SV=1;tr|G3V595|G3V595_HUMANAlpha-1-antichymotrypsin(Fragment)OS=HomosapiensGN=SERPINA3PE=1SV=3;tr|A0A087WY93|A0A087WY93_HUMANAlpha-1-antichymotrypsin(Fragment)OS=HomosapiensGN=SERPINA3PE=1SV=1	16583000	13885000	446800000	72364000	14547000	7282900	48722000	278190000	471680000	198310000	112835800	200836980	0.561828	0.479692
sp|Q9BR76|COR1B_HUMANCoronin-1BOS=HomosapiensGN=CORO1BPE=1SV=1;tr|A0A087WW53|A0A087WW53_HUMANCoroninOS=HomosapiensGN=CORO1BPE=1SV=1;tr|F5H390|F5H390_HUMANCoroninOS=HomosapiensGN=CORO1BPE=1SV=1;tr|F5H0D2|F5H0D2_HUMANCoronin(Fragment)OS=HomosapiensGN=CORO1BPE=1SV=2	8015600	10712000	2020600	20065000	1	21073000	6291700	10719000	23666000	1	8.16264e+06	1.23499e+07	0.660946	0.483147
tr|E7EVH9|E7EVH9_HUMANPseudouridine-5'-phosphatase(Fragment)OS=HomosapiensGN=PUDPPE=1SV=1;sp|Q08623|HDHD1_HUMANPseudouridine-5'-phosphataseOS=HomosapiensGN=PUDPPE=1SV=3	4909900	3641400	1	4188800	1	6996400	1	1	21585000	1	2.54802e+06	5.71628e+06	0.445748	0.484641
sp|Q8WW22|DNJA4_HUMANDnaJhomologsubfamilyAmember4OS=HomosapiensGN=DNAJA4PE=1SV=1;tr|F8WF76|F8WF76_HUMANDnaJhomologsubfamilyAmember4OS=HomosapiensGN=DNAJA4PE=1SV=1;tr|C9JDE6|C9JDE6_HUMANDnaJhomologsubfamilyAmember4OS=HomosapiensGN=DNAJA4PE=1SV=2;tr|F5H170|F5H170_HUMANDnaJhomologsubfamilyAmember4OS=HomosapiensGN=DNAJA4PE=1SV=1	1	8761300	1	1	1	1	1	1	2180900	1	1.75226e+06	436181	4.01728	0.486888
sp|P53621|COPA_HUMANCoatomersubunitalphaOS=HomosapiensGN=COPAPE=1SV=2	3300400	1	849270	9044200	1	1	1	50558000	1	1	2.63877e+06	1.01116e+07	0.260965	0.486984
tr|C9IZ80|C9IZ80_HUMANBasicleucinezipperandW2domain-containingprotein1(Fragment)OS=HomosapiensGN=BZW1PE=1SV=1;sp|Q7L1Q6|BZW1_HUMANBasicleucinezipperandW2domain-containingprotein1OS=HomosapiensGN=BZW1PE=1SV=1;tr|H0Y503|H0Y503_HUMANBasicleucinezipperandW2domain-containingprotein1(Fragment)OS=HomosapiensGN=BZW1PE=1SV=1;tr|C9JFN4|C9JFN4_HUMANBasicleucinezipperandW2domain-containingprotein1(Fragment)O…	1	4453900	1	2219800	1	1	1	1	2833200	1	1.33474e+06	566641	2.35553	0.487511
sp|P02787|TRFE_HUMANSerotransferrinOS=HomosapiensGN=TFPE=1SV=3;tr|H7C5E8|H7C5E8_HUMANSerotransferrin(Fragment)OS=HomosapiensGN=TFPE=1SV=1;tr|C9JVG0|C9JVG0_HUMANSerotransferrin(Fragment)OS=HomosapiensGN=TFPE=1SV=1;tr|F8WEK9|F8WEK9_HUMANSerotransferrinOS=HomosapiensGN=TFPE=1SV=1;tr|F8WCI6|F8WCI6_HUMANSerotransferrinOS=HomosapiensGN=TFPE=1SV=1;tr|C9JB55|C9JB55_HUMANSerotransferrin(Fragment)OS=Homosa…	807830000	115960000	8927500000	174310000	30890000	71331000	174740000	208170000	1192800000	1961000000	2011298000	721608200	2.78724	0.487864
sp|P03973|SLPI_HUMANAntileukoproteinaseOS=HomosapiensGN=SLPIPE=1SV=2	157290000	161950000	4572500	112580000	1	2782300	1	868060000	180780000	1740100	8.72785e+07	2.10672e+08	0.414285	0.492897
tr|E7EVV3|E7EVV3_HUMANMitochondria-eatingproteinOS=HomosapiensGN=SPATA18PE=1SV=1;sp|Q8TC71|MIEAP_HUMANMitochondria-eatingproteinOS=HomosapiensGN=SPATA18PE=1SV=1	1	1	1	1	48588000	8054300	1	5116700	1	1	9.7176e+06	2.6342e+06	3.68901	0.493021
sp|P48444|COPD_HUMANCoatomersubunitdeltaOS=HomosapiensGN=ARCN1PE=1SV=1;tr|B0YIW6|B0YIW6_HUMANArchain1,isoformCRA_aOS=HomosapiensGN=ARCN1PE=1SV=1;tr|Q6P1Q5|Q6P1Q5_HUMANCoatomersubunitdeltaOS=HomosapiensGN=ARCN1PE=1SV=1;tr|E9PK34|E9PK34_HUMANCoatomersubunitdeltaOS=HomosapiensGN=ARCN1PE=1SV=1	11477000	15627000	2984100	21244000	1	19707000	1	14885000	10761000	27386000	1.02664e+07	1.45478e+07	0.705703	0.497709
sp|P07357|CO8A_HUMANComplementcomponentC8alphachainOS=HomosapiensGN=C8APE=1SV=2	1	2907800	69385000	3869300	1	6283600	1	5630800	10617000	5178500	1.52324e+07	5.54198e+06	2.74855	0.498383
sp|P39019|RS19_HUMAN40SribosomalproteinS19OS=HomosapiensGN=RPS19PE=1SV=2;tr|A0A075B6E2|A0A075B6E2_HUMAN40SribosomalproteinS19OS=HomosapiensGN=RPS19PE=1SV=1;tr|M0R2L9|M0R2L9_HUMAN40SribosomalproteinS19(Fragment)OS=HomosapiensGN=RPS19PE=1SV=1;tr|M0QXK4|M0QXK4_HUMAN40SribosomalproteinS19(Fragment)OS=HomosapiensGN=RPS19PE=1SV=1;tr|M0QYF7|M0QYF7_HUMAN40SribosomalproteinS19(Fragment)OS=HomosapiensGN=RP…	3233200	2349700	21804000	2979300	1	8378900	1	1	6468100	1	6.07324e+06	2.9694e+06	2.04527	0.498735
sp|O96009|NAPSA_HUMANNapsin-AOS=HomosapiensGN=NAPSAPE=1SV=1;tr|M0QXC5|M0QXC5_HUMANNapsin-A(Fragment)OS=HomosapiensGN=NAPSAPE=1SV=1	411060000	336910000	10291000	179250000	51998000	385660000	110920000	25352000	173110000	932140000	197901800	325436400	0.608112	0.500207
sp|P01009|A1AT_HUMANAlpha-1-antitrypsinOS=HomosapiensGN=SERPINA1PE=1SV=3;tr|G3V2B9|G3V2B9_HUMANAlpha-1-antitrypsin(Fragment)OS=HomosapiensGN=SERPINA1PE=1SV=1;tr|G3V544|G3V544_HUMANAlpha-1-antitrypsin(Fragment)OS=HomosapiensGN=SERPINA1PE=1SV=1;tr|G3V5R8|G3V5R8_HUMANAlpha-1-antitrypsin(Fragment)OS=HomosapiensGN=SERPINA1PE=1SV=1;tr|G3V387|G3V387_HUMANAlpha-1-antitrypsin(Fragment)OS=HomosapiensGN=SER…	881980000	2730800000	3317500000	1737700000	1	1163600000	2018100000	242040000	1954100000	9551800000	1.7336e+09	2985928000	0.580589	0.501103
sp|O75083|WDR1_HUMANWDrepeat-containingprotein1OS=HomosapiensGN=WDR1PE=1SV=4;tr|D6RD66|D6RD66_HUMANWDrepeat-containingprotein1(Fragment)OS=HomosapiensGN=WDR1PE=1SV=1	352580000	133350000	17864000	246000000	1	59204000	25140000	87045000	114230000	205610000	1.49959e+08	98245800	1.52636	0.503991
sp|P08238|HS90B_HUMANHeatshockproteinHSP90-betaOS=HomosapiensGN=HSP90AB1PE=1SV=4;sp|Q58FF7|H90B3_HUMANPutativeheatshockproteinHSP90-beta-3OS=HomosapiensGN=HSP90AB3PPE=5SV=1;sp|Q58FF8|H90B2_HUMANPutativeheatshockproteinHSP90-beta2OS=HomosapiensGN=HSP90AB2PPE=1SV=2;tr|F8W026|F8W026_HUMANEndoplasmin(Fragment)OS=HomosapiensGN=HSP90B1PE=1SV=8	262800000	228490000	40039000	332080000	25162000	142400000	38670000	48576000	168140000	238740000	177714200	127305200	1.39597	0.504814
sp|P04003|C4BPA_HUMANC4b-bindingproteinalphachainOS=HomosapiensGN=C4BPAPE=1SV=2;tr|A6PVY5|A6PVY5_HUMANC4b-bindingproteinalphachain(Fragment)OS=HomosapiensGN=C4BPAPE=1SV=1;tr|F2Z2V7|F2Z2V7_HUMANC4b-bindingproteinalphachainOS=HomosapiensGN=C4BPAPE=1SV=1	9572600	4333600	2309600000	5714600	1	24657000	13272000	534620000	83270000	29775000	4.65844e+08	137118800	3.39738	0.505599
sp|P16050|LOX15_HUMANArachidonate15-lipoxygenaseOS=HomosapiensGN=ALOX15PE=1SV=3	117930000	39585000	4925400	182820000	1	39611000	66370000	45618000	30782000	37711000	6.90521e+07	44018400	1.56871	0.505691
tr|K7ERI9|K7ERI9_HUMANApolipoproteinC-I(Fragment)OS=HomosapiensGN=APOC1PE=1SV=1;sp|P02654|APOC1_HUMANApolipoproteinC-IOS=HomosapiensGN=APOC1PE=1SV=1;tr|K7EKP1|K7EKP1_HUMANApolipoproteinC-I(Fragment)OS=HomosapiensGN=APOC1PE=1SV=8;tr|K7EJI9|K7EJI9_HUMANApolipoproteinC-IOS=HomosapiensGN=APOC1PE=1SV=1;tr|K7ELM9|K7ELM9_HUMANApolipoproteinC-IOS=HomosapiensGN=APOC1PE=1SV=1;tr|K7EPF9|K7EPF9_HUMANApolipop…	19378000	106570000	123050000	45325000	1	32622000	21306000	1	124300000	1	5.88646e+07	3.56456e+07	1.65138	0.505771
sp|Q15075|EEA1_HUMANEarlyendosomeantigen1OS=HomosapiensGN=EEA1PE=1SV=2	5831600	1	1	3130900	1	1	1585100	5491000	9475100	1	1.7925e+06	3.31024e+06	0.541502	0.506775
sp|P04229|2B11_HUMANHLAclassIIhistocompatibilityantigen,DRB1-1betachainOS=HomosapiensGN=HLA-DRB1PE=1SV=2;sp|Q29974|2B1G_HUMANHLAclassIIhistocompatibilityantigen,DRB1-16betachainOS=HomosapiensGN=HLA-DRB1PE=1SV=1;sp|P13760|2B14_HUMANHLAclassIIhistocompatibilityantigen,DRB1-4betachainOS=HomosapiensGN=HLA-DRB1PE=1SV=1;sp|Q30154|DRB5_HUMANHLAclassIIhistocompatibilityantigen,DRbeta5chainOS=HomosapiensG…	14171000	218900000	5334200	147390000	1	80906000	1645900	47836000	78299000	11409000	7.7159e+07	44019180	1.75285	0.506909
sp|P16422|EPCAM_HUMANEpithelialcelladhesionmoleculeOS=HomosapiensGN=EPCAMPE=1SV=2;tr|B5MCA4|B5MCA4_HUMANEpithelialcelladhesionmoleculeOS=HomosapiensGN=EPCAMPE=1SV=1;tr|C9JKY3|C9JKY3_HUMANEpithelialcelladhesionmolecule(Fragment)OS=HomosapiensGN=EPCAMPE=1SV=1	1	1	1	1	237280	832700	1	1	1	1	47456.8	166541	0.284956	0.511099
tr|B8ZZU8|B8ZZU8_HUMANElongin-BOS=HomosapiensGN=ELOBPE=1SV=1;sp|Q15370|ELOB_HUMANElongin-BOS=HomosapiensGN=ELOBPE=1SV=1;tr|I3L0M9|I3L0M9_HUMANElongin-B(Fragment)OS=HomosapiensGN=ELOBPE=1SV=1;tr|A0A0B4J296|A0A0B4J296_HUMANElongin-BOS=HomosapiensGN=ELOBPE=1SV=1	1	1	1	2000800	1	1	1	6949700	1	1	400161	1.38994e+06	0.287898	0.513113
sp|Q8N4P2|TT30B_HUMANTetratricopeptiderepeatprotein30BOS=HomosapiensGN=TTC30BPE=1SV=2;sp|Q86WT1|TT30A_HUMANTetratricopeptiderepeatprotein30AOS=HomosapiensGN=TTC30APE=1SV=3	5103900	1	1	1933600	1	1	1	3057600	1	1	1.4075e+06	611521	2.30164	0.515385
tr|E5RHW4|E5RHW4_HUMANErlin-2(Fragment)OS=HomosapiensGN=ERLIN2PE=1SV=1;sp|O94905|ERLN2_HUMANErlin-2OS=HomosapiensGN=ERLIN2PE=1SV=1;tr|E5RJ09|E5RJ09_HUMANErlin-2(Fragment)OS=HomosapiensGN=ERLIN2PE=1SV=1;tr|B0QZ43|B0QZ43_HUMANErlin-1(Fragment)OS=HomosapiensGN=ERLIN1PE=1SV=1;sp|O75477|ERLN1_HUMANErlin-1OS=HomosapiensGN=ERLIN1PE=1SV=1	9417700	5453800	1	10571000	1	1	1	13515000	1	1	5.0885e+06	2.703e+06	1.88254	0.516283
sp|P05362|ICAM1_HUMANIntercellularadhesionmolecule1OS=HomosapiensGN=ICAM1PE=1SV=2;tr|K7EKL8|K7EKL8_HUMANIntercellularadhesionmolecule1(Fragment)OS=HomosapiensGN=ICAM1PE=1SV=1;tr|E7ESS4|E7ESS4_HUMANIntercellularadhesionmolecule1OS=HomosapiensGN=ICAM1PE=1SV=1	12835000	54733000	23323000	48194000	1	83821000	1	18751000	21817000	83522000	2.7817e+07	4.15822e+07	0.668964	0.51931
sp|P04899|GNAI2_HUMANGuaninenucleotide-bindingproteinG(i)subunitalpha-2OS=HomosapiensGN=GNAI2PE=1SV=3	269330000	176870000	10936000	179550000	1	62996000	72881000	235970000	18032000	25489000	1.27337e+08	83073600	1.53282	0.51996
sp|P29401|TKT_HUMANTransketolaseOS=HomosapiensGN=TKTPE=1SV=3;tr|A0A0B4J1R6|A0A0B4J1R6_HUMANTransketolaseOS=HomosapiensGN=TKTPE=1SV=1;tr|E9PFF2|E9PFF2_HUMANTransketolaseOS=HomosapiensGN=TKTPE=1SV=1;tr|F8W888|F8W888_HUMANTransketolaseOS=HomosapiensGN=TKTPE=1SV=1;tr|F8WAX4|F8WAX4_HUMANTransketolaseOS=HomosapiensGN=TKTPE=1SV=1	215670000	509320000	35662000	276050000	250060000	190460000	44708000	111340000	191320000	418450000	257352400	191255600	1.34559	0.521318
sp|Q9UM07|PADI4_HUMANProtein-argininedeiminasetype-4OS=HomosapiensGN=PADI4PE=1SV=2;tr|B1AQ67|B1AQ67_HUMANProtein-argininedeiminasetype-4OS=HomosapiensGN=PADI4PE=1SV=1	1	1	1	1	33547000	1	1	110620000	1	1	6.7094e+06	2.2124e+07	0.303263	0.523691
sp|Q14624|ITIH4_HUMANInter-alpha-trypsininhibitorheavychainH4OS=HomosapiensGN=ITIH4PE=1SV=4;tr|B7ZKJ8|B7ZKJ8_HUMANITIH4proteinOS=HomosapiensGN=ITIH4PE=1SV=1;tr|H7C0L5|H7C0L5_HUMANInter-alpha-trypsininhibitorheavychainH4(Fragment)OS=HomosapiensGN=ITIH4PE=1SV=1;CON__Q3T052	1145700	1	507330000	908500	1071800	3010200	8154800	17428000	134060000	1390700	1.02091e+08	32808740	3.11171	0.525827
tr|K7ENJ0|K7ENJ0_HUMANUVexcisionrepairproteinRAD23homologAOS=HomosapiensGN=RAD23APE=1SV=1;tr|K7ELW1|K7ELW1_HUMANUVexcisionrepairproteinRAD23homologAOS=HomosapiensGN=RAD23APE=1SV=1;tr|Q5W0S5|Q5W0S5_HUMANUVexcisionrepairproteinRAD23homologB(Fragment)OS=HomosapiensGN=RAD23BPE=1SV=1;sp|P54725|RD23A_HUMANUVexcisionrepairproteinRAD23homologAOS=HomosapiensGN=RAD23APE=1SV=1;sp|P54727|RD23B_HUMANUVexcisio…	1	760370	555000	1	1	1014800	1	1	1	1454100	263075	493781	0.532776	0.529554
tr|H7C3G9|H7C3G9_HUMANN-acetyl-D-glucosaminekinaseOS=HomosapiensGN=NAGKPE=1SV=2;sp|Q9UJ70|NAGK_HUMANN-acetyl-D-glucosaminekinaseOS=HomosapiensGN=NAGKPE=1SV=4;tr|E9PPU6|E9PPU6_HUMANN-acetyl-D-glucosaminekinase(Fragment)OS=HomosapiensGN=NAGKPE=1SV=2;tr|H7C286|H7C286_HUMANN-acetyl-D-glucosaminekinaseOS=HomosapiensGN=NAGKPE=1SV=2;tr|C9JEV6|C9JEV6_HUMANN-acetyl-D-glucosaminekinaseOS=HomosapiensGN=NAGK…	27699000	10165000	3339900	12703000	1	21346000	15006000	4053700	22941000	10093000	1.07814e+07	14687940	0.734029	0.530056
sp|Q9Y266|NUDC_HUMANNuclearmigrationproteinnudCOS=HomosapiensGN=NUDCPE=1SV=1;tr|A0A0A0MSS4|A0A0A0MSS4_HUMANNuclearmigrationproteinnudC(Fragment)OS=HomosapiensGN=NUDCPE=1SV=1;tr|A0A0A0MSU9|A0A0A0MSU9_HUMANNuclearmigrationproteinnudC(Fragment)OS=HomosapiensGN=NUDCPE=1SV=1	1	1	1	1	26527000	53162000	1	2276800	5486500	2776600	5.3054e+06	1.27404e+07	0.416424	0.534197
sp|A0A0B4J1X5|HV374_HUMANImmunoglobulinheavyvariable3-74OS=HomosapiensGN=IGHV3-74PE=3SV=1;sp|A0A0J9YVY3|HV741_HUMANImmunoglobulinheavyvariable7-4-1OS=HomosapiensGN=IGHV7-4-1PE=3SV=1;tr|A0A075B7E8|A0A075B7E8_HUMANImmunoglobulinheavyvariable3/OR16-13(non-functional)(Fragment)OS=HomosapiensGN=IGHV3OR16-13PE=4SV=1	14270000	1	198280000	15932000	1	1	1	154860000	262830000	19788000	4.56964e+07	8.74956e+07	0.522271	0.53819
sp|P20160|CAP7_HUMANAzurocidinOS=HomosapiensGN=AZU1PE=1SV=3;tr|A0A087WXP0|A0A087WXP0_HUMANAzurocidinOS=HomosapiensGN=AZU1PE=1SV=1	37248000	48104000	1	38720000	155940000	1	1	717850000	25390000	1389700	5.60024e+07	1.48926e+08	0.376042	0.538782
sp|Q9H4A4|AMPB_HUMANAminopeptidaseBOS=HomosapiensGN=RNPEPPE=1SV=2;tr|A6NKB8|A6NKB8_HUMANAminopeptidaseBOS=HomosapiensGN=RNPEPPE=1SV=1;tr|C9JMZ3|C9JMZ3_HUMANAminopeptidaseB(Fragment)OS=HomosapiensGN=RNPEPPE=1SV=1;tr|A0A087WUS4|A0A087WUS4_HUMANAminopeptidaseB(Fragment)OS=HomosapiensGN=RNPEPPE=1SV=1;tr|A0A087WU27|A0A087WU27_HUMANAminopeptidaseB(Fragment)OS=HomosapiensGN=RNPEPPE=1SV=1	30217000	29551000	1	28855000	29721000	42829000	32509000	19647000	25436000	21205000	2.36688e+07	28325200	0.835609	0.540948
sp|Q9Y678|COPG1_HUMANCoatomersubunitgamma-1OS=HomosapiensGN=COPG1PE=1SV=1	5256700	1695500	2063700	7448700	1	5285800	1	1	30608000	1	3.29292e+06	7.17876e+06	0.458703	0.541627
sp|P04040|CATA_HUMANCatalaseOS=HomosapiensGN=CATPE=1SV=3	37247000	37013000	1	11408000	55049000	38184000	1	191630000	28898000	1	2.81434e+07	5.17424e+07	0.543914	0.542898
sp|P00568|KAD1_HUMANAdenylatekinaseisoenzyme1OS=HomosapiensGN=AK1PE=1SV=3;tr|Q5T9B7|Q5T9B7_HUMANAdenylatekinaseisoenzyme1OS=HomosapiensGN=AK1PE=1SV=1;tr|H0YID2|H0YID2_HUMANAdenylatekinaseisoenzyme1(Fragment)OS=HomosapiensGN=AK1PE=1SV=1;tr|H0Y4J6|H0Y4J6_HUMANAdenylatekinaseisoenzyme1(Fragment)OS=HomosapiensGN=AK1PE=1SV=1	15724000	16604000	1	27339000	1	6316800	12966000	9042600	55532000	9359900	1.19334e+07	18643460	0.640085	0.547365
tr|D3DSM0|D3DSM0_HUMANIntegrinbetaOS=HomosapiensGN=ITGB2PE=1SV=1	38778000	113420000	4109100	37171000	522970000	29466000	1	277350000	35551000	33626000	143289620	7.51986e+07	1.90548	0.550306
sp|P62258|1433E_HUMAN14-3-3proteinepsilonOS=HomosapiensGN=YWHAEPE=1SV=1;tr|B4DJF2|B4DJF2_HUMAN14-3-3proteinepsilonOS=HomosapiensGN=YWHAEPE=1SV=1;tr|I3L3T1|I3L3T1_HUMAN14-3-3proteinepsilonOS=HomosapiensGN=YWHAEPE=1SV=1;tr|I3L0W5|I3L0W5_HUMAN14-3-3proteinepsilonOS=HomosapiensGN=YWHAEPE=1SV=1;tr|K7EM20|K7EM20_HUMAN14-3-3proteinepsilon(Fragment)OS=HomosapiensGN=YWHAEPE=1SV=1;tr|K7EIT4|K7EIT4_HUMAN14-…	154580000	98302000	11969000	105350000	1	80407000	28338000	213730000	179110000	21098000	7.40402e+07	104536600	0.708271	0.551847
sp|P06312|KV401_HUMANImmunoglobulinkappavariable4-1OS=HomosapiensGN=IGKV4-1PE=1SV=1	5141800	17068000	166480000	30500000	1	20870000	1	115940000	146580000	64821000	4.3838e+07	6.96422e+07	0.629474	0.552647
sp|P07327|ADH1A_HUMANAlcoholdehydrogenase1AOS=HomosapiensGN=ADH1APE=1SV=2;sp|P00326|ADH1G_HUMANAlcoholdehydrogenase1COS=HomosapiensGN=ADH1CPE=1SV=2;tr|D6RHZ6|D6RHZ6_HUMANAlcoholdehydrogenase1BOS=HomosapiensGN=ADH1BPE=1SV=2;tr|V9HW50|V9HW50_HUMANAlcoholdehydrogenase1BOS=HomosapiensGN=HEL-S-117PE=1SV=1;sp|P00325|ADH1B_HUMANAlcoholdehydrogenase1BOS=HomosapiensGN=ADH1BPE=1SV=2;tr|A0A087WUC4|A0A087WUC…	25816000	3884500	860650	39624000	1	7565300	1	20184000	114300000	1	1.4037e+07	2.84099e+07	0.49409	0.552731
tr|C9JZ20|C9JZ20_HUMANProhibitin(Fragment)OS=HomosapiensGN=PHBPE=1SV=1;tr|E7ESE2|E7ESE2_HUMANProhibitin(Fragment)OS=HomosapiensGN=PHBPE=1SV=2;tr|E9PCW0|E9PCW0_HUMANProhibitin(Fragment)OS=HomosapiensGN=PHBPE=1SV=2;tr|C9JW96|C9JW96_HUMANProhibitin(Fragment)OS=HomosapiensGN=PHBPE=1SV=2;sp|P35232|PHB_HUMANProhibitinOS=HomosapiensGN=PHBPE=1SV=1;tr|D6RBK0|D6RBK0_HUMANProhibitin(Fragment)OS=HomosapiensG…	8392600	6255600	3054800	27420000	1	3800900	6077900	5847400	12558000	782780	9.0246e+06	5813396	1.55238	0.553205
sp|O95833|CLIC3_HUMANChlorideintracellularchannelprotein3OS=HomosapiensGN=CLIC3PE=1SV=2	2313400	1946700	1	4327000	1	3578500	1	1	1685900	1	1.71742e+06	1.05288e+06	1.63116	0.554561
sp|Q8NE86|MCU_HUMANCalciumuniporterprotein,mitochondrialOS=HomosapiensGN=MCUPE=1SV=1	1	1	1	1	7406400	1	1	2606900	1	1	1.48128e+06	521381	2.84107	0.557992
sp|P38606|VATA_HUMANV-typeprotonATPasecatalyticsubunitAOS=HomosapiensGN=ATP6V1APE=1SV=2;tr|C9JA17|C9JA17_HUMANV-typeprotonATPasecatalyticsubunitA(Fragment)OS=HomosapiensGN=ATP6V1APE=1SV=8;tr|C9JVW8|C9JVW8_HUMANV-typeprotonATPasecatalyticsubunitA(Fragment)OS=HomosapiensGN=ATP6V1APE=1SV=1	2875200	1	4155700	14901000	1	5973200	5110100	3821100	17307000	1573200	4.38638e+06	6756920	0.649169	0.558439
sp|P31946|1433B_HUMAN14-3-3proteinbeta/alphaOS=HomosapiensGN=YWHABPE=1SV=3;tr|Q4VY20|Q4VY20_HUMAN14-3-3proteinbeta/alpha(Fragment)OS=HomosapiensGN=YWHABPE=1SV=1;tr|Q4VY19|Q4VY19_HUMAN14-3-3proteinbeta/alpha(Fragment)OS=HomosapiensGN=YWHABPE=1SV=1;tr|A0A0J9YWE8|A0A0J9YWE8_HUMAN14-3-3proteinbeta/alphaOS=HomosapiensGN=YWHABPE=1SV=1;tr|A0A0J9YWZ2|A0A0J9YWZ2_HUMAN14-3-3proteinbeta/alpha(Fragment)OS=Ho…	61146000	93130000	10942000	173820000	18519000	30103000	8831000	128060000	60975000	18189000	71511400	49231600	1.45255	0.559876
sp|Q8N392|RHG18_HUMANRhoGTPase-activatingprotein18OS=HomosapiensGN=ARHGAP18PE=1SV=3	34966000	78037000	6994700	61253000	18786000	16440000	1	6731600	91946000	20856000	40007340	2.71947e+07	1.47114	0.561944
sp|P17655|CAN2_HUMANCalpain-2catalyticsubunitOS=HomosapiensGN=CAPN2PE=1SV=6	29849000	16545000	5549200	78168000	1	22045000	1	86573000	97416000	722650	2.60222e+07	4.13513e+07	0.629296	0.561972
sp|Q96G03|PGM2_HUMANPhosphoglucomutase-2OS=HomosapiensGN=PGM2PE=1SV=4;tr|E9PD70|E9PD70_HUMANPhosphoglucomutase-2OS=HomosapiensGN=PGM2PE=1SV=1;tr|E7ENQ8|E7ENQ8_HUMANPhosphoglucomutase-2OS=HomosapiensGN=PGM2PE=1SV=1	35142000	19860000	1	21515000	1	1	6904400	44347000	74048000	1	1.53034e+07	2.50599e+07	0.610673	0.564767
sp|P14625|ENPL_HUMANEndoplasminOS=HomosapiensGN=HSP90B1PE=1SV=1;tr|Q96GW1|Q96GW1_HUMANEndoplasminOS=HomosapiensGN=HSP90B1PE=1SV=1;tr|A0A1W2PRR1|A0A1W2PRR1_HUMANEndoplasminOS=HomosapiensGN=HSP90B1PE=1SV=1;tr|H0YIV0|H0YIV0_HUMANEndoplasmin(Fragment)OS=HomosapiensGN=HSP90B1PE=1SV=1;tr|F8VPC7|F8VPC7_HUMANEndoplasminOS=HomosapiensGN=HSP90B1PE=1SV=1;sp|Q58FF3|ENPLL_HUMANPutativeendoplasmin-likeproteinO…	18597000	34853000	20647000	46846000	89969000	20959000	146750000	65270000	39597000	18223000	42182400	58159800	0.725284	0.57063
tr|H7BXY6|H7BXY6_HUMANTetraspaninOS=HomosapiensGN=TSPAN14PE=1SV=1;sp|Q8NG11|TSN14_HUMANTetraspanin-14OS=HomosapiensGN=TSPAN14PE=1SV=1;tr|A6NEP9|A6NEP9_HUMANTetraspanin(Fragment)OS=HomosapiensGN=TSPAN14PE=1SV=2	1	1	63646000	1267500	1	1	1	15075000	1293400	10066000	1.29827e+07	5.28688e+06	2.45564	0.571329
sp|O60884|DNJA2_HUMANDnaJhomologsubfamilyAmember2OS=HomosapiensGN=DNAJA2PE=1SV=1;tr|A0A087WT48|A0A087WT48_HUMANDnaJhomologsubfamilyAmember2(Fragment)OS=HomosapiensGN=DNAJA2PE=1SV=1	7815100	4135200	3808100	5070200	8830800	11812000	1	25922000	6390200	1	5931880	8.82484e+06	0.67218	0.57245
tr|F5H2F4|F5H2F4_HUMANC-1-tetrahydrofolatesynthase,cytoplasmicOS=HomosapiensGN=MTHFD1PE=1SV=1;tr|V9GY75|V9GY75_HUMANC-1-tetrahydrofolatesynthase,cytoplasmic(Fragment)OS=HomosapiensGN=MTHFD1PE=1SV=1	1	1	1	1504800	1	1	1	1	4018000	1	300961	803601	0.374515	0.57419
tr|C9JPM4|C9JPM4_HUMANADP-ribosylationfactor4(Fragment)OS=HomosapiensGN=ARF4PE=1SV=1;sp|P18085|ARF4_HUMANADP-ribosylationfactor4OS=HomosapiensGN=ARF4PE=1SV=3;tr|F5H1V1|F5H1V1_HUMANADP-ribosylationfactor3(Fragment)OS=HomosapiensGN=ARF3PE=4SV=1;tr|F5H6T5|F5H6T5_HUMANADP-ribosylationfactor3(Fragment)OS=HomosapiensGN=ARF3PE=4SV=1;tr|F8WDB3|F8WDB3_HUMANADP-ribosylationfactor4OS=HomosapiensGN=ARF4PE=1S…	6933500	32751000	2597000	29565000	14004000	1	1	162640000	17496000	1	17170100	3.60272e+07	0.476587	0.576558
sp|Q14247|SRC8_HUMANSrcsubstratecortactinOS=HomosapiensGN=CTTNPE=1SV=2;tr|H0YCD9|H0YCD9_HUMANSrcsubstratecortactin(Fragment)OS=HomosapiensGN=CTTNPE=1SV=1	4722900	1	1	1	1	1	1	1	12422000	1	944581	2.4844e+06	0.380205	0.578307
sp|O95716|RAB3D_HUMANRas-relatedproteinRab-3DOS=HomosapiensGN=RAB3DPE=1SV=1	21775000	1727400	1	2011600	1	9258900	1	2672300	1	490160	5.1028e+06	2.48427e+06	2.05404	0.580411
sp|P04839|CY24B_HUMANCytochromeb-245heavychainOS=HomosapiensGN=CYBBPE=1SV=2	56107000	22060000	18169000	56244000	25339000	32767000	1	255030000	17361000	13427000	35583800	6.3717e+07	0.558466	0.580547
tr|F8WF90|F8WF90_HUMANPRA1familyproteinOS=HomosapiensGN=ARL6IP5PE=1SV=1;tr|C9JQU6|C9JQU6_HUMANPRA1familyproteinOS=HomosapiensGN=ARL6IP5PE=1SV=1;tr|F8WF33|F8WF33_HUMANPRA1familyproteinOS=HomosapiensGN=ARL6IP5PE=1SV=1;sp|O75915|PRAF3_HUMANPRA1familyprotein3OS=HomosapiensGN=ARL6IP5PE=1SV=1	1	4284900	1601800	6852600	1	3020200	1	3696800	1635900	1	2.54786e+06	1.67058e+06	1.52513	0.582605
sp|Q71U36|TBA1A_HUMANTubulinalpha-1AchainOS=HomosapiensGN=TUBA1APE=1SV=1;sp|Q9BQE3|TBA1C_HUMANTubulinalpha-1CchainOS=HomosapiensGN=TUBA1CPE=1SV=1;sp|P68363|TBA1B_HUMANTubulinalpha-1BchainOS=HomosapiensGN=TUBA1BPE=1SV=1;tr|F5H5D3|F5H5D3_HUMANTubulinalphachainOS=HomosapiensGN=TUBA1CPE=1SV=1;sp|Q13748|TBA3C_HUMANTubulinalpha-3C/DchainOS=HomosapiensGN=TUBA3CPE=1SV=3;tr|F8VQQ4|F8VQQ4_HUMANTubulinalpha…	943180000	751620000	132420000	1813800000	21977000	381530000	357040000	284040000	1116200000	512530000	732599400	530268000	1.38156	0.585436
sp|P11216|PYGB_HUMANGlycogenphosphorylase,brainformOS=HomosapiensGN=PYGBPE=1SV=5;tr|H0Y4Z6|H0Y4Z6_HUMANAlpha-1,4glucanphosphorylase(Fragment)OS=HomosapiensGN=PYGBPE=1SV=1	16360000	20229000	1	25406000	1	10496000	1	6523500	22876000	3401600	1.2399e+07	8.65942e+06	1.43185	0.585494
sp|P13639|EF2_HUMANElongationfactor2OS=HomosapiensGN=EEF2PE=1SV=4;tr|K7EJ74|K7EJ74_HUMAN116kDaU5smallnuclearribonucleoproteincomponent(Fragment)OS=HomosapiensGN=EFTUD2PE=1SV=1;tr|K7EP67|K7EP67_HUMAN116kDaU5smallnuclearribonucleoproteincomponent(Fragment)OS=HomosapiensGN=EFTUD2PE=1SV=1;sp|Q15029|U5S1_HUMAN116kDaU5smallnuclearribonucleoproteincomponentOS=HomosapiensGN=EFTUD2PE=1SV=1	64915000	96386000	85643000	190870000	14368000	121190000	35538000	239220000	147610000	42613000	90436400	117234200	0.771417	0.586143
sp|Q13200|PSMD2_HUMAN26Sproteasomenon-ATPaseregulatorysubunit2OS=HomosapiensGN=PSMD2PE=1SV=3;tr|H7C2Q3|H7C2Q3_HUMAN26Sproteasomenon-ATPaseregulatorysubunit2(Fragment)OS=HomosapiensGN=PSMD2PE=1SV=1;tr|H7C1H2|H7C1H2_HUMAN26Sproteasomenon-ATPaseregulatorysubunit2(Fragment)OS=HomosapiensGN=PSMD2PE=1SV=1;tr|C9JPC0|C9JPC0_HUMAN26Sproteasomenon-ATPaseregulatorysubunit2(Fragment)OS=HomosapiensGN=PSMD2PE=…	25626000	18356000	1	27339000	7926600	32953000	1	62803000	10915000	8052300	1.58495e+07	2.29447e+07	0.690772	0.586145
sp|P01857|IGHG1_HUMANImmunoglobulinheavyconstantgamma1OS=HomosapiensGN=IGHG1PE=1SV=1;tr|A0A0A0MS08|A0A0A0MS08_HUMANImmunoglobulinheavyconstantgamma1(Fragment)OS=HomosapiensGN=IGHG1PE=1SV=1;tr|A0A0A0MS07|A0A0A0MS07_HUMANImmunoglobulinheavyconstantgamma1(Fragment)OS=HomosapiensGN=IGHG1PE=1SV=1	1224500000	444900000	7019800000	985050000	19052000	333200000	2326000000	585090000	6855300000	4634800000	1938660400	2946878000	0.657869	0.588674
sp|Q9H2G2|SLK_HUMANSTE20-likeserine/threonine-proteinkinaseOS=HomosapiensGN=SLKPE=1SV=1	4902000	6291800	1	6283800	1	1	1	27043000	5733100	1	3.49552e+06	6.55522e+06	0.533242	0.589059
sp|P32455|GBP1_HUMANGuanylate-bindingprotein1OS=HomosapiensGN=GBP1PE=1SV=2	1	13595000	1	16519000	1	1	1	1	16285000	1	6.0228e+06	3.257e+06	1.84919	0.591046
tr|B4DGU4|B4DGU4_HUMANCateninbeta-1OS=HomosapiensGN=CTNNB1PE=1SV=1;sp|P35222|CTNB1_HUMANCateninbeta-1OS=HomosapiensGN=CTNNB1PE=1SV=1	1	1	1	2856300	1	1	1	1	1156100	1	571261	231221	2.47063	0.596183
tr|K7EJ28|K7EJ28_HUMANTumornecrosisfactorligandsuperfamilymember13OS=HomosapiensGN=TNFSF13PE=3SV=1;tr|C9JFN2|C9JFN2_HUMANTumornecrosisfactorligandsuperfamilymember13(Fragment)OS=HomosapiensGN=TNFSF13PE=3SV=1;tr|C9JF68|C9JF68_HUMANTumornecrosisfactorligandsuperfamilymember13(Fragment)OS=HomosapiensGN=TNFSF13PE=3SV=1;tr|Q2QBA2|Q2QBA2_HUMANTumornecrosisfactor(Ligand)superfamilymember13transcriptvari…	3160000	1	1	1	5971900	1	1	1	4873100	1	1.82638e+06	974621	1.87394	0.597343
sp|P50395|GDIB_HUMANRabGDPdissociationinhibitorbetaOS=HomosapiensGN=GDI2PE=1SV=2;tr|Q5SX87|Q5SX87_HUMANRabGDPdissociationinhibitor(Fragment)OS=HomosapiensGN=GDI2PE=1SV=1;tr|V9GYJ7|V9GYJ7_HUMANRabGDPdissociationinhibitor(Fragment)OS=HomosapiensGN=GDI2PE=1SV=8;tr|V9GYF8|V9GYF8_HUMANRabGDPdissociationinhibitor(Fragment)OS=HomosapiensGN=GDI2PE=1SV=1;tr|Q5SX90|Q5SX90_HUMANRabGDPdissociationinhibitor(F…	32485000	38442000	5448000	154810000	1	1	1	19882000	198150000	152250000	4.6237e+07	7.40564e+07	0.624348	0.597646
sp|A0A0B4J1Y9|HV372_HUMANImmunoglobulinheavyvariable3-72OS=HomosapiensGN=IGHV3-72PE=3SV=1;tr|A0A075B7D8|A0A075B7D8_HUMANImmunoglobulinheavyvariable3/OR15-7(pseudogene)(Fragment)OS=HomosapiensGN=IGHV3OR15-7PE=1SV=1	1	1	1	29164000	1	1	1	1	11953000	1	5.8328e+06	2.3906e+06	2.43989	0.599917
sp|P40763|STAT3_HUMANSignaltransducerandactivatoroftranscription3OS=HomosapiensGN=STAT3PE=1SV=2;tr|G8JLH9|G8JLH9_HUMANSignaltransducerandactivatoroftranscriptionOS=HomosapiensGN=STAT3PE=1SV=1	17763000	12786000	1	14754000	1	29426000	5815700	8560500	4132100	13559000	9.0606e+06	12298660	0.736714	0.600064
sp|P37802|TAGL2_HUMANTransgelin-2OS=HomosapiensGN=TAGLN2PE=1SV=3;tr|X6RJP6|X6RJP6_HUMANTransgelin-2(Fragment)OS=HomosapiensGN=TAGLN2PE=1SV=1;tr|C9J5W6|C9J5W6_HUMANTransgelin-3OS=HomosapiensGN=TAGLN3PE=1SV=1;sp|Q9UI15|TAGL3_HUMANTransgelin-3OS=HomosapiensGN=TAGLN3PE=1SV=2	43789000	104690000	11363000	93326000	1	14821000	1	21634000	380480000	41901000	5.06336e+07	9.17672e+07	0.551761	0.600726
sp|P41091|IF2G_HUMANEukaryotictranslationinitiationfactor2subunit3OS=HomosapiensGN=EIF2S3PE=1SV=3;sp|Q2VIR3|IF2GL_HUMANPutativeeukaryotictranslationinitiationfactor2subunit3-likeproteinOS=HomosapiensGN=EIF2S3LPE=5SV=2;tr|H7BZU1|H7BZU1_HUMANEukaryotictranslationinitiationfactor2subunit3(Fragment)OS=HomosapiensGN=EIF2S3PE=1SV=1;tr|F8W810|F8W810_HUMANPutativeeukaryotictranslationinitiationfactor2sub…	1	1	1	6472400	1	1	1	1400900	12625000	1	1.29448e+06	2.80518e+06	0.461461	0.602749
tr|A0A140TA32|A0A140TA32_HUMANComplementC4-AOS=HomosapiensGN=C4APE=1SV=1;tr|A0A140TA44|A0A140TA44_HUMANComplementC4-AOS=HomosapiensGN=C4APE=1SV=1	490850000	1266900000	7882100000	1251900000	36448000	959370000	565310000	568340000	1754800000	2989500000	2185639600	1367464000	1.59832	0.603797
sp|P04114|APOB_HUMANApolipoproteinB-100OS=HomosapiensGN=APOBPE=1SV=2;tr|A8MUN2|A8MUN2_HUMANApolipoproteinB-100OS=HomosapiensGN=APOBPE=1SV=2	22736000	5735100	470610000	26527000	3393100	14058000	36957000	704980000	203810000	4877800	105800240	192936560	0.548368	0.603902
sp|P07305|H10_HUMANHistoneH1.0OS=HomosapiensGN=H1F0PE=1SV=3	14750000	1	1	1955800	1	19013000	1	4519900	4059800	1091100	3.34116e+06	5.73676e+06	0.582412	0.607024
sp|P0DMV9|HS71B_HUMANHeatshock70kDaprotein1BOS=HomosapiensGN=HSPA1BPE=1SV=1;sp|P0DMV8|HS71A_HUMANHeatshock70kDaprotein1AOS=HomosapiensGN=HSPA1APE=1SV=1;tr|A0A0G2JIW1|A0A0G2JIW1_HUMANHeatshock70kDaprotein1BOS=HomosapiensGN=HSPA1BPE=1SV=1;tr|V9GZ37|V9GZ37_HUMANHeatshock70kDaprotein1AOS=HomosapiensGN=HSPA1APE=1SV=1	192320000	211570000	10554000	269550000	63906000	43979000	225650000	35729000	195150000	80599000	149580000	116221400	1.28703	0.607525
sp|O15551|CLD3_HUMANClaudin-3OS=HomosapiensGN=CLDN3PE=1SV=1	1	1	1	1	3673000	1	1	8678800	1	1	734601	1.73576e+06	0.423215	0.609725
sp|P53004|BIEA_HUMANBiliverdinreductaseAOS=HomosapiensGN=BLVRAPE=1SV=2	1	10394000	3224100	18781000	38259000	18414000	1	23318000	60251000	2480900	1.41316e+07	2.08928e+07	0.676388	0.611481
sp|Q14914|PTGR1_HUMANProstaglandinreductase1OS=HomosapiensGN=PTGR1PE=1SV=2;tr|F2Z3J9|F2Z3J9_HUMANProstaglandinreductase1(Fragment)OS=HomosapiensGN=PTGR1PE=1SV=2;tr|F6XGT7|F6XGT7_HUMANProstaglandinreductase1OS=HomosapiensGN=PTGR1PE=1SV=1;tr|Q5JVP2|Q5JVP2_HUMANProstaglandinreductase1(Fragment)OS=HomosapiensGN=PTGR1PE=1SV=1	1	68248000	1	38281000	1	18474000	1	1	27654000	20950000	2.13058e+07	1.34156e+07	1.58814	0.61309
sp|O75643|U520_HUMANU5smallnuclearribonucleoprotein200kDahelicaseOS=HomosapiensGN=SNRNP200PE=1SV=2	1	1	3997700	1	1	1	1	9165900	1	1	799541	1.83318e+06	0.436149	0.619254
sp|Q9H4G4|GAPR1_HUMANGolgi-associatedplantpathogenesis-relatedprotein1OS=HomosapiensGN=GLIPR2PE=1SV=3;tr|Q5VZR0|Q5VZR0_HUMANGolgi-associatedplantpathogenesis-relatedprotein1OS=HomosapiensGN=GLIPR2PE=1SV=1;tr|A0A088AWP7|A0A088AWP7_HUMANGolgi-associatedplantpathogenesis-relatedprotein1OS=HomosapiensGN=GLIPR2PE=1SV=1;tr|A0A087WUM5|A0A087WUM5_HUMANGolgi-associatedplantpathogenesis-relatedprotein1OS=H…	73031000	46847000	11496000	97835000	1	25216000	16838000	171900000	99694000	9183700	4.58418e+07	64566340	0.709995	0.620048
sp|P35998|PRS7_HUMAN26Sproteasomeregulatorysubunit7OS=HomosapiensGN=PSMC2PE=1SV=3;tr|C9JLS9|C9JLS9_HUMAN26Sproteasomeregulatorysubunit7(Fragment)OS=HomosapiensGN=PSMC2PE=1SV=1;tr|A0A1W2PQS1|A0A1W2PQS1_HUMAN26Sproteasomeregulatorysubunit7OS=HomosapiensGN=PSMC2PE=1SV=1	249950000	197380000	104800000	172320000	1	130570000	1	258320000	165740000	1	1.4489e+08	1.10926e+08	1.30619	0.620246
sp|P40925|MDHC_HUMANMalatedehydrogenase,cytoplasmicOS=HomosapiensGN=MDH1PE=1SV=4;tr|B9A041|B9A041_HUMANMalatedehydrogenase,cytoplasmicOS=HomosapiensGN=MDH1PE=1SV=1;tr|C9JF79|C9JF79_HUMANMalatedehydrogenase(Fragment)OS=HomosapiensGN=MDH1PE=1SV=1;tr|B8ZZ51|B8ZZ51_HUMANMalatedehydrogenase,cytoplasmicOS=HomosapiensGN=MDH1PE=1SV=1;tr|C9JRL4|C9JRL4_HUMANMalatedehydrogenase,cytoplasmic(Fragment)OS=Homos…	38517000	98914000	7378100	111870000	1	64758000	83225000	8765200	88399000	82031000	5.13358e+07	65435640	0.784524	0.620475
tr|X6R433|X6R433_HUMANTyrosine-proteinphosphataseOS=HomosapiensGN=PTPRCPE=1SV=1;sp|P08575|PTPRC_HUMANReceptor-typetyrosine-proteinphosphataseCOS=HomosapiensGN=PTPRCPE=1SV=2;tr|A0A0A0MT22|A0A0A0MT22_HUMANTyrosine-proteinphosphataseOS=HomosapiensGN=PTPRCPE=1SV=1;tr|M3ZCP1|M3ZCP1_HUMANTyrosine-proteinphosphatase(Fragment)OS=HomosapiensGN=PTPRCPE=1SV=1;tr|A0A075B788|A0A075B788_HUMANTyrosine-proteinph…	138400000	74715000	56492000	87431000	54230000	226750000	1	336600000	27880000	1	82253600	1.18246e+08	0.695614	0.624938
tr|B5MCE7|B5MCE7_HUMANBasicleucinezipperandW2domain-containingprotein2OS=HomosapiensGN=BZW2PE=1SV=1;tr|B5MCH7|B5MCH7_HUMANBasicleucinezipperandW2domain-containingprotein2OS=HomosapiensGN=BZW2PE=1SV=1;tr|E7ETZ4|E7ETZ4_HUMANBasicleucinezipperandW2domain-containingprotein2(Fragment)OS=HomosapiensGN=BZW2PE=1SV=1;sp|Q9Y6E2|BZW2_HUMANBasicleucinezipperandW2domain-containingprotein2OS=HomosapiensGN=BZW2…	1	2307500	1	3260000	1	1	1	5425800	3510700	1	1.1135e+06	1.7873e+06	0.623007	0.626888
tr|F5GX11|F5GX11_HUMANProteasomeendopeptidasecomplexOS=HomosapiensGN=PSMA1PE=1SV=1;sp|P25786|PSA1_HUMANProteasomesubunitalphatype-1OS=HomosapiensGN=PSMA1PE=1SV=1;tr|B4DEV8|B4DEV8_HUMANProteasomesubunitalphatypeOS=HomosapiensPE=2SV=1	1	1	1	1	100730000	27632000	71737000	28426000	20886000	9490700	2.0146e+07	31634340	0.63684	0.62729
sp|P01860|IGHG3_HUMANImmunoglobulinheavyconstantgamma3OS=HomosapiensGN=IGHG3PE=1SV=2	11118000	10247000	545090000	25991000	188080000	64337000	105440000	48381000	487670000	426160000	156105200	226397600	0.689518	0.629264
sp|P68371|TBB4B_HUMANTubulinbeta-4BchainOS=HomosapiensGN=TUBB4BPE=1SV=1;sp|P04350|TBB4A_HUMANTubulinbeta-4AchainOS=HomosapiensGN=TUBB4APE=1SV=2;tr|M0R2D3|M0R2D3_HUMANTubulinbeta-4Achain(Fragment)OS=HomosapiensGN=TUBB4APE=1SV=1;tr|M0QY85|M0QY85_HUMANTubulinbeta-4Achain(Fragment)OS=HomosapiensGN=TUBB4APE=1SV=1;tr|M0QZL7|M0QZL7_HUMANTubulinbeta-4Achain(Fragment)OS=HomosapiensGN=TUBB4APE=1SV=8;tr|M0R…	1290400000	1584000000	142470000	783000000	14360000	603750000	247280000	769000000	899790000	476290000	762846000	599222000	1.27306	0.631666
tr|A0A087X0X3|A0A087X0X3_HUMANHeterogeneousnuclearribonucleoproteinMOS=HomosapiensGN=HNRNPMPE=1SV=1;sp|P52272|HNRPM_HUMANHeterogeneousnuclearribonucleoproteinMOS=HomosapiensGN=HNRNPMPE=1SV=3;tr|M0R019|M0R019_HUMANHeterogeneousnuclearribonucleoproteinM(Fragment)OS=HomosapiensGN=HNRNPMPE=1SV=8;tr|M0R2T0|M0R2T0_HUMANHeterogeneousnuclearribonucleoproteinM(Fragment)OS=HomosapiensGN=HNRNPMPE=1SV=1;tr|M…	2115400	1	1	2273100	4737900	10574000	1	1	2135100	1779300	1.82528e+06	2.89768e+06	0.629911	0.632315
sp|P18206|VINC_HUMANVinculinOS=HomosapiensGN=VCLPE=1SV=4;tr|A0A096LPE1|A0A096LPE1_HUMANVinculinOS=HomosapiensGN=VCLPE=1SV=1	15583000	23275000	8392700	15348000	19031000	8158900	1	36962000	61739000	4461500	16325940	2.22643e+07	0.733279	0.635496
sp|Q9UKK3|PARP4_HUMANPoly[ADP-ribose]polymerase4OS=HomosapiensGN=PARP4PE=1SV=3	1	1	1	1	34031000	9119600	1	5370000	2359100	1	6.8062e+06	3.36974e+06	2.0198	0.637891
sp|O95436|NPT2B_HUMANSodium-dependentphosphatetransportprotein2BOS=HomosapiensGN=SLC34A2PE=1SV=3;tr|D6RBC0|D6RBC0_HUMANSodium-dependentphosphatetransportprotein2B(Fragment)OS=HomosapiensGN=SLC34A2PE=1SV=1;tr|D6RA94|D6RA94_HUMANSodium-dependentphosphatetransportprotein2B(Fragment)OS=HomosapiensGN=SLC34A2PE=1SV=1	134060000	70695000	1	32144000	9150200	51285000	20441000	27345000	51617000	33718000	4.92098e+07	36881200	1.33428	0.638768
sp|P02750|A2GL_HUMANLeucine-richalpha-2-glycoproteinOS=HomosapiensGN=LRG1PE=1SV=2	5910000	3899900	14852000	3374300	1	1	1	1	17548000	1	5.60724e+06	3.5096e+06	1.59769	0.639407
sp|O15143|ARC1B_HUMANActin-relatedprotein2/3complexsubunit1BOS=HomosapiensGN=ARPC1BPE=1SV=3;tr|A0A1W2PNV4|A0A1W2PNV4_HUMANUncharacterizedproteinOS=HomosapiensPE=4SV=1;tr|C9J4Z7|C9J4Z7_HUMANActin-relatedprotein2/3complexsubunit1B(Fragment)OS=HomosapiensGN=ARPC1BPE=1SV=1;tr|F8VXW2|F8VXW2_HUMANActin-relatedprotein2/3complexsubunit1BOS=HomosapiensGN=ARPC1BPE=1SV=2;tr|C9JEY1|C9JEY1_HUMANActin-relatedp…	22039000	77016000	17208000	154210000	56869000	75240000	38294000	78715000	65209000	1	65468400	5.14916e+07	1.27144	0.640744
sp|P02760|AMBP_HUMANProteinAMBPOS=HomosapiensGN=AMBPPE=1SV=1;tr|S4R471|S4R471_HUMANProteinAMBP(Fragment)OS=HomosapiensGN=AMBPPE=1SV=1;tr|S4R3Y4|S4R3Y4_HUMANProteinAMBPOS=HomosapiensGN=AMBPPE=1SV=1;CON__P00978	35167000	9249100	345680000	3590200	1	56587000	26896000	40125000	29573000	77070000	7.87373e+07	46050200	1.70981	0.642001
sp|P04433|KV311_HUMANImmunoglobulinkappavariable3-11OS=HomosapiensGN=IGKV3-11PE=1SV=1;sp|A0A0A0MRZ8|KVD11_HUMANImmunoglobulinkappavariable3D-11OS=HomosapiensGN=IGKV3D-11PE=3SV=6	1	6732900	47846000	1	1	16440000	27018000	1	40513000	1	1.09158e+07	1.67942e+07	0.649973	0.642458
sp|Q5VTE0|EF1A3_HUMANPutativeelongationfactor1-alpha-like3OS=HomosapiensGN=EEF1A1P5PE=5SV=1;sp|P68104|EF1A1_HUMANElongationfactor1-alpha1OS=HomosapiensGN=EEF1A1PE=1SV=1;tr|A0A087WVQ9|A0A087WVQ9_HUMANElongationfactor1-alpha1OS=HomosapiensGN=EEF1A1PE=1SV=1;tr|A0A087WV01|A0A087WV01_HUMANElongationfactor1-alphaOS=HomosapiensGN=EEF1A1PE=1SV=1;sp|Q05639|EF1A2_HUMANElongationfactor1-alpha2OS=Homosapiens…	428610000	4062100000	1521000000	3394300000	60729000	1718500000	1136900000	642780000	2684600000	1196500000	1893347800	1475856000	1.28288	0.642727
sp|Q13409|DC1I2_HUMANCytoplasmicdynein1intermediatechain2OS=HomosapiensGN=DYNC1I2PE=1SV=3;tr|E7EQL5|E7EQL5_HUMANCytoplasmicdynein1intermediatechain2(Fragment)OS=HomosapiensGN=DYNC1I2PE=1SV=1;tr|E9PGG1|E9PGG1_HUMANCytoplasmicdynein1intermediatechain2(Fragment)OS=HomosapiensGN=DYNC1I2PE=1SV=1;tr|E7EUM4|E7EUM4_HUMANCytoplasmicdynein1intermediatechain2(Fragment)OS=HomosapiensGN=DYNC1I2PE=1SV=1;tr|E7E…	4029200	2501000	1	5612400	1	2711800	1	1	5650900	1	2.42852e+06	1.67254e+06	1.45199	0.644699
sp|Q9NP55|BPIA1_HUMANBPIfold-containingfamilyAmember1OS=HomosapiensGN=BPIFA1PE=1SV=1	180740000	159590000	1	71279000	1	3818800	172180000	15149000	3574600	95975000	8.23218e+07	58139480	1.41594	0.646569
tr|G3V2V8|G3V2V8_HUMANEpididymalsecretoryproteinE1(Fragment)OS=HomosapiensGN=NPC2PE=1SV=1;tr|J3KMY5|J3KMY5_HUMANEpididymalsecretoryproteinE1OS=HomosapiensGN=NPC2PE=1SV=1;sp|P61916|NPC2_HUMANEpididymalsecretoryproteinE1OS=HomosapiensGN=NPC2PE=1SV=1;tr|G3V3E8|G3V3E8_HUMANEpididymalsecretoryproteinE1OS=HomosapiensGN=NPC2PE=1SV=1;tr|E7EMS2|E7EMS2_HUMANEpididymalsecretoryproteinE1OS=HomosapiensGN=NPC2…	2680800	5813000	1	3402200	1	4531800	1	12298000	1182800	1	2.3792e+06	3.60252e+06	0.660427	0.647339
sp|P09914|IFIT1_HUMANInterferon-inducedproteinwithtetratricopeptiderepeats1OS=HomosapiensGN=IFIT1PE=1SV=2;sp|Q5T764|IFT1B_HUMANInterferon-inducedproteinwithtetratricopeptiderepeats1BOS=HomosapiensGN=IFIT1BPE=1SV=1	1	13378000	6806800	21761000	1	19402000	1	1	4392400	5185300	8.38916e+06	5.79594e+06	1.44742	0.648971
sp|P60228|EIF3E_HUMANEukaryotictranslationinitiationfactor3subunitEOS=HomosapiensGN=EIF3EPE=1SV=1;tr|E5RIP5|E5RIP5_HUMANEukaryotictranslationinitiationfactor3subunitEOS=HomosapiensGN=EIF3EPE=1SV=1;tr|E5RJ25|E5RJ25_HUMANEukaryotictranslationinitiationfactor3subunitEOS=HomosapiensGN=EIF3EPE=1SV=1;tr|E5RII3|E5RII3_HUMANEukaryotictranslationinitiationfactor3subunitEOS=HomosapiensGN=EIF3EPE=1SV=1;tr|E…	18146000	45429000	36488000	35965000	1	15369000	33555000	49900000	5101800	3693100	2.72056e+07	21523780	1.26398	0.649227
sp|Q08257|QOR_HUMANQuinoneoxidoreductaseOS=HomosapiensGN=CRYZPE=1SV=1;tr|C9JH92|C9JH92_HUMANQuinoneoxidoreductase(Fragment)OS=HomosapiensGN=CRYZPE=1SV=1;tr|A6NP24|A6NP24_HUMANQuinoneoxidoreductase(Fragment)OS=HomosapiensGN=CRYZPE=1SV=1	1919800	2494300	2322800	1	1	1	1	1	12806000	1	1.34738e+06	2.5612e+06	0.526074	0.655652
sp|P05023|AT1A1_HUMANSodium/potassium-transportingATPasesubunitalpha-1OS=HomosapiensGN=ATP1A1PE=1SV=1;tr|M0R116|M0R116_HUMANSodium/potassium-transportingATPasesubunitalphaOS=HomosapiensGN=ATP1A3PE=1SV=1;tr|B1AKY9|B1AKY9_HUMANSodium/potassium-transportingATPasesubunitalphaOS=HomosapiensGN=ATP1A2PE=1SV=1;sp|P13637|AT1A3_HUMANSodium/potassium-transportingATPasesubunitalpha-3OS=HomosapiensGN=ATP1A3PE…	24837000	14477000	5169000	26506000	21416000	10929000	11826000	95521000	14974000	1	18481000	2.665e+07	0.693471	0.659153
tr|E7EPB3|E7EPB3_HUMAN60SribosomalproteinL14OS=HomosapiensGN=RPL14PE=1SV=1;sp|P50914|RL14_HUMAN60SribosomalproteinL14OS=HomosapiensGN=RPL14PE=1SV=4	3075200	1	1	3630800	1	1	1	1	12883000	1	1.3412e+06	2.5766e+06	0.520531	0.660113
sp|Q9Y3I0|RTCB_HUMANtRNA-splicingligaseRtcBhomologOS=HomosapiensGN=RTCBPE=1SV=1	9640200	1	1	7360600	1	1	1	14263000	11346000	1	3.40016e+06	5.1218e+06	0.66386	0.663351
sp|P01619|KV320_HUMANImmunoglobulinkappavariable3-20OS=HomosapiensGN=IGKV3-20PE=1SV=2	1	5256000	50150000	14392000	1	1	1	5156000	23821000	17104000	1.39596e+07	9.2162e+06	1.51468	0.665706
sp|Q9NZM1|MYOF_HUMANMyoferlinOS=HomosapiensGN=MYOFPE=1SV=1;tr|H0YD14|H0YD14_HUMANMyoferlin(Fragment)OS=HomosapiensGN=MYOFPE=1SV=1	21297000	16469000	1	21675000	1	20602000	1	25267000	17585000	10773000	1.18882e+07	1.48454e+07	0.8008	0.666523
sp|P01861|IGHG4_HUMANImmunoglobulinheavyconstantgamma4OS=HomosapiensGN=IGHG4PE=1SV=1	1	75198	125650000	92451	1	1	1	1	247270000	1	2.51635e+07	4.9454e+07	0.508827	0.673033
tr|A0A087WV45|A0A087WV45_HUMANTransthyretinOS=HomosapiensGN=TTRPE=1SV=1;sp|P02766|TTHY_HUMANTransthyretinOS=HomosapiensGN=TTRPE=1SV=1;tr|A0A087WT59|A0A087WT59_HUMANTransthyretinOS=HomosapiensGN=TTRPE=1SV=1	7621700	9065600	125540000	5802000	1	9292400	1	1593000	9141600	69034000	2.96059e+07	1.78122e+07	1.66211	0.677124
tr|E9PNR8|E9PNR8_HUMANHypoxia-induciblefactor1-alphainhibitorOS=HomosapiensGN=HIF1ANPE=1SV=1;sp|Q9NWT6|HIF1N_HUMANHypoxia-induciblefactor1-alphainhibitorOS=HomosapiensGN=HIF1ANPE=1SV=2	1	2202300	1	1	1	1034200	1	1	124900	1	440461	231821	1.90001	0.678161
sp|P23381|SYWC_HUMANTryptophan--tRNAligase,cytoplasmicOS=HomosapiensGN=WARSPE=1SV=2;tr|G3V277|G3V277_HUMANTryptophan--tRNAligase,cytoplasmic(Fragment)OS=HomosapiensGN=WARSPE=1SV=1;tr|G3V3H8|G3V3H8_HUMANTryptophan--tRNAligase,cytoplasmic(Fragment)OS=HomosapiensGN=WARSPE=1SV=8;tr|G3V3Y5|G3V3Y5_HUMANTryptophan--tRNAligase,cytoplasmic(Fragment)OS=HomosapiensGN=WARSPE=1SV=8;tr|G3V3X0|G3V3X0_HUMANTrypt…	12613000	39964000	44339000	112950000	1	30562000	1	40410000	127790000	74083000	4.19732e+07	5.4569e+07	0.769177	0.678603
sp|P28482|MK01_HUMANMitogen-activatedproteinkinase1OS=HomosapiensGN=MAPK1PE=1SV=3	1	7552100	1	1302800	13543000	4623200	5004000	1143300	552170	4968500	4.47958e+06	3258234	1.37485	0.678629
sp|P48735|IDHP_HUMANIsocitratedehydrogenase[NADP],mitochondrialOS=HomosapiensGN=IDH2PE=1SV=2;tr|H0YL11|H0YL11_HUMANIsocitratedehydrogenase[NADP],mitochondrialOS=HomosapiensGN=IDH2PE=1SV=1	6012600	7666700	1	7795300	1	1	19656000	7547700	3026000	1	4.29492e+06	6.04594e+06	0.710381	0.679236
sp|Q9Y6Y8|S23IP_HUMANSEC23-interactingproteinOS=HomosapiensGN=SEC23IPPE=1SV=1;tr|H7C0V8|H7C0V8_HUMANSEC23-interactingprotein(Fragment)OS=HomosapiensGN=SEC23IPPE=1SV=1	1	1	1	1	7986000	1	1	10899000	2742100	1	1.5972e+06	2.72822e+06	0.585437	0.680419
tr|E9PDF6|E9PDF6_HUMANUnconventionalmyosin-IbOS=HomosapiensGN=MYO1BPE=1SV=1;sp|O43795|MYO1B_HUMANUnconventionalmyosin-IbOS=HomosapiensGN=MYO1BPE=1SV=3;tr|H7C2Y7|H7C2Y7_HUMANUnconventionalmyosin-Ib(Fragment)OS=HomosapiensGN=MYO1BPE=1SV=1;tr|E7EQD9|E7EQD9_HUMANUnconventionalmyosin-Ib(Fragment)OS=HomosapiensGN=MYO1BPE=1SV=1	1	16230000	1	4998800	1	1	1	35151000	2129100	1	4.24576e+06	7.45602e+06	0.569441	0.684523
tr|F5H7V9|F5H7V9_HUMANTenascinOS=HomosapiensGN=TNCPE=1SV=1;tr|E9PC84|E9PC84_HUMANTenascinOS=HomosapiensGN=TNCPE=1SV=1;tr|J3QSU6|J3QSU6_HUMANTenascinOS=HomosapiensGN=TNCPE=1SV=1;sp|P24821|TENA_HUMANTenascinOS=HomosapiensGN=TNCPE=1SV=3;tr|H0YGZ3|H0YGZ3_HUMANTenascin(Fragment)OS=HomosapiensGN=TNCPE=1SV=1	5494900	1	4375500	1	1	1	1	2089500	4591200	1	1.97408e+06	1.33614e+06	1.47745	0.686274
tr|C9IZZ0|C9IZZ0_HUMANRas-relatedproteinRab-7a(Fragment)OS=HomosapiensGN=RAB7APE=1SV=1;tr|C9J4V0|C9J4V0_HUMANRas-relatedproteinRab-7aOS=HomosapiensGN=RAB7APE=1SV=1;tr|C9J8S3|C9J8S3_HUMANRas-relatedproteinRab-7aOS=HomosapiensGN=RAB7APE=1SV=1;sp|P51149|RAB7A_HUMANRas-relatedproteinRab-7aOS=HomosapiensGN=RAB7APE=1SV=1;tr|C9J7D1|C9J7D1_HUMANRas-relatedproteinRab-7aOS=HomosapiensGN=RAB7APE=1SV=1;tr|C9…	1	1	22222000	1	1	1	1	1	11720000	1	4.4444e+06	2.344e+06	1.89607	0.686927
sp|Q9Y3C8|UFC1_HUMANUbiquitin-foldmodifier-conjugatingenzyme1OS=HomosapiensGN=UFC1PE=1SV=3	4602300	23132000	26524000	15755000	1	31856000	10186000	3527000	10636000	29658000	1.40027e+07	17172600	0.815407	0.690286
sp|O43707|ACTN4_HUMANAlpha-actinin-4OS=HomosapiensGN=ACTN4PE=1SV=2;tr|F5GXS2|F5GXS2_HUMANAlpha-actinin-4OS=HomosapiensGN=ACTN4PE=1SV=2;tr|H7C144|H7C144_HUMANAlpha-actinin-4(Fragment)OS=HomosapiensGN=ACTN4PE=1SV=1;tr|K7EJH8|K7EJH8_HUMANAlpha-actinin-4(Fragment)OS=HomosapiensGN=ACTN4PE=1SV=1;tr|F6THM6|F6THM6_HUMANAlpha-actinin-2OS=HomosapiensGN=ACTN2PE=1SV=1;tr|K7EP19|K7EP19_HUMANAlpha-actinin-4(Fr…	233000000	247130000	35195000	375020000	1	170410000	153380000	252610000	112080000	40183000	1.78069e+08	145732600	1.22189	0.690992
sp|Q14697|GANAB_HUMANNeutralalpha-glucosidaseABOS=HomosapiensGN=GANABPE=1SV=3;tr|F5H6X6|F5H6X6_HUMANNeutralalpha-glucosidaseABOS=HomosapiensGN=GANABPE=1SV=1;tr|E9PKU7|E9PKU7_HUMANNeutralalpha-glucosidaseABOS=HomosapiensGN=GANABPE=1SV=1;tr|E9PNH1|E9PNH1_HUMANNeutralalpha-glucosidaseAB(Fragment)OS=HomosapiensGN=GANABPE=1SV=1	36879000	1	1	1	1	8220400	1	1	10242000	2611500	7.3758e+06	4.21478e+06	1.74998	0.691307
sp|P27348|1433T_HUMAN14-3-3proteinthetaOS=HomosapiensGN=YWHAQPE=1SV=1;tr|E9PG15|E9PG15_HUMAN14-3-3proteintheta(Fragment)OS=HomosapiensGN=YWHAQPE=1SV=1	15700000	13088000	1	20118000	1	1	1	18502000	17994000	1	9.7812e+06	7.2992e+06	1.34004	0.694699
sp|Q13247|SRSF6_HUMANSerine/arginine-richsplicingfactor6OS=HomosapiensGN=SRSF6PE=1SV=2;tr|A0A0D9SEM4|A0A0D9SEM4_HUMANSerine/arginine-rich-splicingfactor4(Fragment)OS=HomosapiensGN=SRSF4PE=1SV=1;sp|Q08170|SRSF4_HUMANSerine/arginine-richsplicingfactor4OS=HomosapiensGN=SRSF4PE=1SV=2;tr|B4DJK0|B4DJK0_HUMANSerine/arginine-rich-splicingfactor5OS=HomosapiensGN=SRSF5PE=1SV=1;tr|B4DUA4|B4DUA4_HUMANSerine/…	1	1	1	3499600	1	1	1	3139100	2330500	1	699921	1.09392e+06	0.639828	0.697377
sp|P63104|1433Z_HUMAN14-3-3proteinzeta/deltaOS=HomosapiensGN=YWHAZPE=1SV=1;tr|E7EX29|E7EX29_HUMAN14-3-3proteinzeta/delta(Fragment)OS=HomosapiensGN=YWHAZPE=1SV=1;tr|E7ESK7|E7ESK7_HUMAN14-3-3proteinzeta/delta(Fragment)OS=HomosapiensGN=YWHAZPE=1SV=1;tr|E9PD24|E9PD24_HUMAN14-3-3proteinzeta/delta(Fragment)OS=HomosapiensGN=YWHAZPE=1SV=1;tr|E7EVZ2|E7EVZ2_HUMAN14-3-3proteinzeta/delta(Fragment)OS=Homosapi…	407560000	264140000	45445000	424220000	33988000	296440000	1246000	208580000	341010000	121160000	235070600	193687200	1.21366	0.701893
tr|E9PJD9|E9PJD9_HUMAN60SribosomalproteinL27aOS=HomosapiensGN=RPL27APE=1SV=1;sp|P46776|RL27A_HUMAN60SribosomalproteinL27aOS=HomosapiensGN=RPL27APE=1SV=2;tr|E9PLL6|E9PLL6_HUMAN60SribosomalproteinL27aOS=HomosapiensGN=RPL27APE=1SV=1;tr|E9PLX7|E9PLX7_HUMAN60SribosomalproteinL27aOS=HomosapiensGN=RPL27APE=1SV=1	1	2501900	5976600	4038900	1	1	1	1	5108700	4216000	2.50348e+06	1.86494e+06	1.34239	0.70626
sp|P50991|TCPD_HUMANT-complexprotein1subunitdeltaOS=HomosapiensGN=CCT4PE=1SV=4	1	1	1949500	26384000	1	1	10771000	4442900	27133000	1	5.6667e+06	8.46938e+06	0.669081	0.709333
tr|H0YH81|H0YH81_HUMANATPsynthasesubunitbeta(Fragment)OS=HomosapiensGN=ATP5BPE=1SV=1;sp|P06576|ATPB_HUMANATPsynthasesubunitbeta,mitochondrialOS=HomosapiensGN=ATP5BPE=1SV=3;tr|F8W079|F8W079_HUMANATPsynthasesubunitbeta,mitochondrial(Fragment)OS=HomosapiensGN=ATP5BPE=1SV=1	2929600	12018000	1982700	95053000	3783200	1004700	54565000	2649700	17558000	1	23153300	1.51555e+07	1.52772	0.71091
sp|Q9Y265|RUVB1_HUMANRuvB-like1OS=HomosapiensGN=RUVBL1PE=1SV=1;tr|H7C4G5|H7C4G5_HUMANRuvB-likehelicase(Fragment)OS=HomosapiensGN=RUVBL1PE=1SV=1;tr|J3QLR1|J3QLR1_HUMANRuvB-likehelicase(Fragment)OS=HomosapiensGN=RUVBL1PE=1SV=1;tr|E7ETR0|E7ETR0_HUMANRuvB-likehelicaseOS=HomosapiensGN=RUVBL1PE=1SV=1	65449000	24390000	16863000	47680000	1	23671000	1	40512000	43150000	20293000	3.08764e+07	2.55252e+07	1.20964	0.711092
sp|Q13576|IQGA2_HUMANRasGTPase-activating-likeproteinIQGAP2OS=HomosapiensGN=IQGAP2PE=1SV=4;tr|E7EWC2|E7EWC2_HUMANRasGTPase-activating-likeproteinIQGAP2(Fragment)OS=HomosapiensGN=IQGAP2PE=1SV=1;tr|F5H7S7|F5H7S7_HUMANRasGTPase-activating-likeproteinIQGAP2OS=HomosapiensGN=IQGAP2PE=1SV=2;tr|D6R939|D6R939_HUMANRasGTPase-activating-likeproteinIQGAP2(Fragment)OS=HomosapiensGN=IQGAP2PE=1SV=8	3527300	1	1	686130	1	1	1	7087500	1	1	842687	1.4175e+06	0.594488	0.72443
sp|Q5T6V5|QSPP_HUMANQueuosinesalvageproteinOS=HomosapiensGN=C9orf64PE=1SV=1	1	1	1	2473600	19565000	3890500	1	1	2521500	8171800	4.40772e+06	2.91676e+06	1.51117	0.726048
sp|P13489|RINI_HUMANRibonucleaseinhibitorOS=HomosapiensGN=RNH1PE=1SV=2;tr|H0YCR7|H0YCR7_HUMANRibonucleaseinhibitor(Fragment)OS=HomosapiensGN=RNH1PE=1SV=1;tr|E9PMJ3|E9PMJ3_HUMANRibonucleaseinhibitor(Fragment)OS=HomosapiensGN=RNH1PE=1SV=1;tr|E9PLZ3|E9PLZ3_HUMANRibonucleaseinhibitor(Fragment)OS=HomosapiensGN=RNH1PE=1SV=1;tr|E9PIM9|E9PIM9_HUMANRibonucleaseinhibitor(Fragment)OS=HomosapiensGN=RNH1PE=1S…	68100000	143760000	10838000	239160000	1	74460000	10601000	180350000	226090000	76993000	9.23716e+07	113698800	0.812424	0.728818
sp|P00747|PLMN_HUMANPlasminogenOS=HomosapiensGN=PLGPE=1SV=2;tr|Q5TEH5|Q5TEH5_HUMANHCG2029799,isoformCRA_bOS=HomosapiensGN=PLGPE=1SV=1;tr|A6PVI2|A6PVI2_HUMANPlasminogen(Fragment)OS=HomosapiensGN=PLGPE=1SV=1;sp|Q02325|PLGB_HUMANPlasminogen-likeproteinBOS=HomosapiensGN=PLGLB1PE=3SV=1;CON__P06868	12904000	4532500	682020000	1910200	5130300	2558400	1124400	347680000	84007000	1490700	141299400	87372100	1.61721	0.730031
sp|O60664|PLIN3_HUMANPerilipin-3OS=HomosapiensGN=PLIN3PE=1SV=3;tr|K7ERZ3|K7ERZ3_HUMANPerilipin-3(Fragment)OS=HomosapiensGN=PLIN3PE=1SV=1;tr|K7EL96|K7EL96_HUMANPerilipin-3(Fragment)OS=HomosapiensGN=PLIN3PE=1SV=8;tr|K7ER39|K7ER39_HUMANPerilipin-3(Fragment)OS=HomosapiensGN=PLIN3PE=1SV=1;tr|K7EJD0|K7EJD0_HUMANPerilipin-3(Fragment)OS=HomosapiensGN=PLIN3PE=1SV=1	13389000	7693000	5270400	26535000	1	21247000	1	1	14268000	6470400	1.05775e+07	8.39708e+06	1.25966	0.731896
sp|P09769|FGR_HUMANTyrosine-proteinkinaseFgrOS=HomosapiensGN=FGRPE=1SV=2	9637700	1	1	1	1	1	1	16221000	1	1	1.92754e+06	3.2442e+06	0.59415	0.736161
tr|Q5T985|Q5T985_HUMANInter-alpha-trypsininhibitorheavychainH2OS=HomosapiensGN=ITIH2PE=1SV=1;sp|P19823|ITIH2_HUMANInter-alpha-trypsininhibitorheavychainH2OS=HomosapiensGN=ITIH2PE=1SV=2;tr|Q5T987|Q5T987_HUMANInter-alpha-trypsininhibitorheavychainH2(Fragment)OS=HomosapiensGN=ITIH2PE=1SV=1;CON__Q9TRI1	871710	5210100	328680000	2400600	1	13287000	9435400	209820000	205510000	37527000	6.74325e+07	95115880	0.708951	0.738261
sp|P06744|G6PI_HUMANGlucose-6-phosphateisomeraseOS=HomosapiensGN=GPIPE=1SV=4;tr|A0A0A0MTS2|A0A0A0MTS2_HUMANGlucose-6-phosphateisomerase(Fragment)OS=HomosapiensGN=GPIPE=1SV=1;tr|K7EQ48|K7EQ48_HUMANGlucose-6-phosphateisomeraseOS=HomosapiensGN=GPIPE=1SV=2;tr|A0A0J9YXP8|A0A0J9YXP8_HUMANGlucose-6-phosphateisomerase(Fragment)OS=HomosapiensGN=GPIPE=1SV=1;tr|A0A0J9YX90|A0A0J9YX90_HUMANGlucose-6-phosphate…	31159000	225610000	1	223620000	50759000	97048000	26377000	7516500	255570000	28949000	1.0623e+08	83092100	1.27846	0.73882
sp|Q4G0F5|VP26B_HUMANVacuolarproteinsorting-associatedprotein26BOS=HomosapiensGN=VPS26BPE=1SV=2	7343400	4615900	1	4433300	1	7684400	1	1721100	3018900	543670	3.27852e+06	2.59361e+06	1.26407	0.739159
tr|E9PCX2|E9PCX2_HUMANAldosereductaseOS=HomosapiensGN=AKR1B1PE=1SV=1;sp|P15121|ALDR_HUMANAldosereductaseOS=HomosapiensGN=AKR1B1PE=1SV=3;tr|E9PEF9|E9PEF9_HUMANAldosereductaseOS=HomosapiensGN=AKR1B1PE=1SV=1	1	25007000	1	1	1	1	1	1	15064000	1	5.0014e+06	3.0128e+06	1.66005	0.742186
tr|A0A075B6R9|A0A075B6R9_HUMANImmunoglobulinkappavariable2D-24(non-functional)(Fragment)OS=HomosapiensGN=IGKV2D-24PE=4SV=1;sp|A0A0C4DH68|KV224_HUMANImmunoglobulinkappavariable2-24OS=HomosapiensGN=IGKV2-24PE=3SV=1	4045300	4717700	72920000	4843400	10603000	5398600	6198300	3527200	39675000	75109000	19425880	25981620	0.747678	0.744085
tr|D6RAT0|D6RAT0_HUMAN40SribosomalproteinS3aOS=HomosapiensGN=RPS3APE=1SV=1;sp|P61247|RS3A_HUMAN40SribosomalproteinS3aOS=HomosapiensGN=RPS3APE=1SV=2;tr|D6RAS7|D6RAS7_HUMAN40SribosomalproteinS3a(Fragment)OS=HomosapiensGN=RPS3APE=1SV=1;tr|D6R9B6|D6R9B6_HUMAN40SribosomalproteinS3aOS=HomosapiensGN=RPS3APE=1SV=1;tr|H0Y8L7|H0Y8L7_HUMAN40SribosomalproteinS3a(Fragment)OS=HomosapiensGN=RPS3APE=1SV=1;tr|D6R…	1	2583500	9100500	3654100	1	9228800	1	1	8972800	1650300	3.06762e+06	3.97038e+06	0.772626	0.746358
sp|P02649|APOE_HUMANApolipoproteinEOS=HomosapiensGN=APOEPE=1SV=1;tr|H0Y7L5|H0Y7L5_HUMANApolipoproteinE(Fragment)OS=HomosapiensGN=APOEPE=1SV=2;tr|E9PEV4|E9PEV4_HUMANApolipoproteinE(Fragment)OS=HomosapiensGN=APOEPE=1SV=1;tr|E7ERP7|E7ERP7_HUMANApolipoproteinE(Fragment)OS=HomosapiensGN=APOEPE=1SV=1;CON__Q03247	16232000	26544000	343480000	26463000	1	18754000	35668000	174280000	56888000	7094200	8.25438e+07	58536840	1.41012	0.74744
sp|P20340|RAB6A_HUMANRas-relatedproteinRab-6AOS=HomosapiensGN=RAB6APE=1SV=3;tr|F5H3K7|F5H3K7_HUMANRas-relatedproteinRab-6A(Fragment)OS=HomosapiensGN=RAB6APE=1SV=1;tr|F5GX61|F5GX61_HUMANRas-relatedproteinRab-6AOS=HomosapiensGN=RAB6APE=1SV=1;tr|C9JB90|C9JB90_HUMANRas-relatedproteinRab-6B(Fragment)OS=HomosapiensGN=RAB6BPE=4SV=1;tr|C9JU14|C9JU14_HUMANRas-relatedproteinRab-6B(Fragment)OS=HomosapiensGN…	17983000	23948000	1	19753000	30818000	42047000	1	16417000	5509100	14052000	1.85004e+07	1.5605e+07	1.18554	0.752454
sp|P10643|CO7_HUMANComplementcomponentC7OS=HomosapiensGN=C7PE=1SV=2;tr|B4DLR2|B4DLR2_HUMANProlylendopeptidaseFAPOS=HomosapiensGN=FAPPE=1SV=1;tr|A0A0D9SEN1|A0A0D9SEN1_HUMANProlylendopeptidaseFAPOS=HomosapiensGN=FAPPE=1SV=1;sp|Q12884|SEPR_HUMANProlylendopeptidaseFAPOS=HomosapiensGN=FAPPE=1SV=5	1	12588000	33572000	7261000	7916500	5707600	1	4739800	69948000	4435500	1.22675e+07	1.69662e+07	0.723056	0.753412
sp|P02786|TFR1_HUMANTransferrinreceptorprotein1OS=HomosapiensGN=TFRCPE=1SV=2;tr|G3V0E5|G3V0E5_HUMANTransferrinreceptor(P90,CD71),isoformCRA_cOS=HomosapiensGN=TFRCPE=1SV=1;tr|F8WBE5|F8WBE5_HUMANTransferrinreceptorprotein1OS=HomosapiensGN=TFRCPE=1SV=1;tr|H7C3V5|H7C3V5_HUMANTransferrinreceptorprotein1(Fragment)OS=HomosapiensGN=TFRCPE=1SV=1	27256000	55242000	22542000	85124000	18160000	25487000	39370000	25521000	25941000	67922000	41664800	36848200	1.13071	0.757576
tr|A0A087WTT1|A0A087WTT1_HUMANPolyadenylate-bindingproteinOS=HomosapiensGN=PABPC1PE=1SV=1;tr|E7EQV3|E7EQV3_HUMANPolyadenylate-bindingproteinOS=HomosapiensGN=PABPC1PE=1SV=1;tr|E7ERJ7|E7ERJ7_HUMANPolyadenylate-bindingproteinOS=HomosapiensGN=PABPC1PE=1SV=1;sp|Q9H361|PABP3_HUMANPolyadenylate-bindingprotein3OS=HomosapiensGN=PABPC3PE=1SV=2;sp|P11940|PABP1_HUMANPolyadenylate-bindingprotein1OS=Homosapien…	12937000	6924000	1	8652700	1	1	28218000	4193400	3165600	2167000	5.70274e+06	7.5488e+06	0.75545	0.758142
tr|F8W111|F8W111_HUMANCarboxypeptidaseM(Fragment)OS=HomosapiensGN=CPMPE=1SV=1;sp|P14384|CBPM_HUMANCarboxypeptidaseMOS=HomosapiensGN=CPMPE=1SV=2	1	7571000	1	4707000	1	1	1	1	8627500	1	2.4556e+06	1.7255e+06	1.42312	0.762342
sp|Q5VWZ2|LYPL1_HUMANLysophospholipase-likeprotein1OS=HomosapiensGN=LYPLAL1PE=1SV=3	1	16007000	1	10350000	5218500	3193200	5890800	9056700	6650800	1536900	6.3151e+06	5265680	1.19929	0.762911
sp|P05546|HEP2_HUMANHeparincofactor2OS=HomosapiensGN=SERPIND1PE=1SV=3;CON__ENSEMBL:ENSBTAP00000018574	8175700	18753000	104420000	9497800	1	27655000	22924000	6538400	13975000	39038000	2.81693e+07	22026080	1.27891	0.767562
sp|P29350|PTN6_HUMANTyrosine-proteinphosphatasenon-receptortype6OS=HomosapiensGN=PTPN6PE=1SV=1;tr|F5H0N8|F5H0N8_HUMANTyrosine-proteinphosphatase(Fragment)OS=HomosapiensGN=PTPN6PE=1SV=1;tr|F5H5H9|F5H5H9_HUMANTyrosine-proteinphosphatase(Fragment)OS=HomosapiensGN=PTPN6PE=1SV=1;tr|F5GY79|F5GY79_HUMANTyrosine-proteinphosphatase(Fragment)OS=HomosapiensGN=PTPN6PE=1SV=1;tr|F5H1Z8|F5H1Z8_HUMANTyrosine-pro…	25269000	38987000	1	64930000	116060000	49892000	1	101800000	51825000	1	4.90492e+07	4.07034e+07	1.20504	0.768855
sp|P37837|TALDO_HUMANTransaldolaseOS=HomosapiensGN=TALDO1PE=1SV=2;tr|F2Z393|F2Z393_HUMANTransaldolaseOS=HomosapiensGN=TALDO1PE=1SV=1;tr|E9PM01|E9PM01_HUMANTransaldolaseOS=HomosapiensGN=TALDO1PE=1SV=1;tr|E9PKI8|E9PKI8_HUMANTransaldolaseOS=HomosapiensGN=TALDO1PE=1SV=1	39181000	29997000	1967600	74461000	6754800	14784000	1	67874000	63895000	34072000	30472280	3.6125e+07	0.843523	0.769124
sp|P20292|AL5AP_HUMANArachidonate5-lipoxygenase-activatingproteinOS=HomosapiensGN=ALOX5APPE=1SV=2;tr|A0A087WW23|A0A087WW23_HUMANArachidonate5-lipoxygenase-activatingproteinOS=HomosapiensGN=ALOX5APPE=1SV=1	8332700	1	16205000	56577000	14254000	21809000	19072000	20168000	40160000	10711000	1.90737e+07	22384000	0.852115	0.769549
sp|Q9Y3Z3|SAMH1_HUMANDeoxynucleosidetriphosphatetriphosphohydrolaseSAMHD1OS=HomosapiensGN=SAMHD1PE=1SV=2	93965000	41142000	7337500	189940000	9862400	9569200	54577000	90426000	117180000	10073000	68449380	56365040	1.21439	0.772052
sp|P78356|PI42B_HUMANPhosphatidylinositol5-phosphate4-kinasetype-2betaOS=HomosapiensGN=PIP4K2BPE=1SV=1	1	1	4757200	1	1	3925500	1	1	2674100	1	951441	1.31992e+06	0.720832	0.778071
sp|Q86UX7|URP2_HUMANFermitinfamilyhomolog3OS=HomosapiensGN=FERMT3PE=1SV=1;tr|F5H1C6|F5H1C6_HUMANFermitinfamilyhomolog3(Fragment)OS=HomosapiensGN=FERMT3PE=1SV=1;tr|F5H3I6|F5H3I6_HUMANFermitinfamilyhomolog3(Fragment)OS=HomosapiensGN=FERMT3PE=1SV=1;tr|H0YFT5|H0YFT5_HUMANFermitinfamilyhomolog3(Fragment)OS=HomosapiensGN=FERMT3PE=1SV=1	18738000	28542000	11479000	44415000	26599000	35676000	1	91355000	20598000	7093300	25954600	3.09445e+07	0.838748	0.779075
tr|F8VWV4|F8VWV4_HUMAN60SacidicribosomalproteinP0(Fragment)OS=HomosapiensGN=RPLP0PE=1SV=1;tr|F8VS58|F8VS58_HUMAN60SacidicribosomalproteinP0(Fragment)OS=HomosapiensGN=RPLP0PE=1SV=1;tr|F8VQY6|F8VQY6_HUMAN60SacidicribosomalproteinP0OS=HomosapiensGN=RPLP0PE=1SV=1;tr|F8VPE8|F8VPE8_HUMAN60SacidicribosomalproteinP0(Fragment)OS=HomosapiensGN=RPLP0PE=1SV=1;tr|F8VRK7|F8VRK7_HUMAN60SacidicribosomalproteinP0…	1	1	9401800	371930	1	3497100	1	1721800	1699900	1	1.95475e+06	1.38376e+06	1.41263	0.779747
sp|P02790|HEMO_HUMANHemopexinOS=HomosapiensGN=HPXPE=1SV=2;tr|Q9BS19|Q9BS19_HUMANHPXproteinOS=HomosapiensGN=HPXPE=1SV=1	56664000	10986000	636000000	12990000	1	1279200	6138100	46459000	186830000	282910000	1.43328e+08	104723260	1.36864	0.783062
sp|P61978|HNRPK_HUMANHeterogeneousnuclearribonucleoproteinKOS=HomosapiensGN=HNRNPKPE=1SV=1;tr|Q5T6W2|Q5T6W2_HUMANHeterogeneousnuclearribonucleoproteinK(Fragment)OS=HomosapiensGN=HNRNPKPE=1SV=1;tr|S4R359|S4R359_HUMANHeterogeneousnuclearribonucleoproteinK(Fragment)OS=HomosapiensGN=HNRNPKPE=1SV=1;tr|S4R457|S4R457_HUMANHeterogeneousnuclearribonucleoproteinKOS=HomosapiensGN=HNRNPKPE=1SV=1	52705000	22958000	11107000	39644000	1	71660000	17546000	21343000	22307000	13818000	2.52828e+07	29334800	0.861871	0.784058
sp|P46926|GNPI1_HUMANGlucosamine-6-phosphateisomerase1OS=HomosapiensGN=GNPDA1PE=1SV=1;tr|D6R917|D6R917_HUMANGlucosamine-6-phosphateisomerase1(Fragment)OS=HomosapiensGN=GNPDA1PE=1SV=1;tr|D6RB13|D6RB13_HUMANGlucosamine-6-phosphateisomerase(Fragment)OS=HomosapiensGN=GNPDA1PE=1SV=8;tr|D6RAY7|D6RAY7_HUMANGlucosamine-6-phosphateisomerase(Fragment)OS=HomosapiensGN=GNPDA1PE=1SV=1;tr|D6R9P4|D6R9P4_HUMANGl…	1	1	1	7249100	1	1	1	1	4788100	1	1.44982e+06	957621	1.51398	0.784158
sp|Q9Y6W5|WASF2_HUMANWiskott-Aldrichsyndromeproteinfamilymember2OS=HomosapiensGN=WASF2PE=1SV=3	1	1	1	3114800	1	1	1	1	2058400	1	622961	411681	1.51321	0.784397
sp|P35858|ALS_HUMANInsulin-likegrowthfactor-bindingproteincomplexacidlabilesubunitOS=HomosapiensGN=IGFALSPE=1SV=1	1	1507200	5203400	1	1	1	1	1	9796800	1	1.34212e+06	1.95936e+06	0.684979	0.786509
tr|A0A024R4E5|A0A024R4E5_HUMANHighdensitylipoproteinbindingprotein(Vigilin),isoformCRA_aOS=HomosapiensGN=HDLBPPE=1SV=1;sp|Q00341|VIGLN_HUMANVigilinOS=HomosapiensGN=HDLBPPE=1SV=2;tr|H0Y394|H0Y394_HUMANVigilin(Fragment)OS=HomosapiensGN=HDLBPPE=1SV=1;tr|H7C0A4|H7C0A4_HUMANVigilin(Fragment)OS=HomosapiensGN=HDLBPPE=1SV=8;tr|C9JMQ6|C9JMQ6_HUMANVigilin(Fragment)OS=HomosapiensGN=HDLBPPE=1SV=8;tr|C9JQ82|C…	1	14009000	1	3448900	1	5579500	4462500	1	3448100	1	3.49158e+06	2.69802e+06	1.29413	0.79455
sp|O60763|USO1_HUMANGeneralvesiculartransportfactorp115OS=HomosapiensGN=USO1PE=1SV=2	24072000	2565500	2986500	27251000	9549900	14033000	6504700	40805000	16723000	1	13284980	1.56131e+07	0.850885	0.795617
sp|P43353|AL3B1_HUMANAldehydedehydrogenasefamily3memberB1OS=HomosapiensGN=ALDH3B1PE=1SV=1;tr|Q9BUJ8|Q9BUJ8_HUMANALDH3B1proteinOS=HomosapiensGN=ALDH3B1PE=1SV=1;tr|A0A087X2D4|A0A087X2D4_HUMANAldehydedehydrogenasefamily3memberB1OS=HomosapiensGN=ALDH3B1PE=1SV=1;tr|A0A087WUF8|A0A087WUF8_HUMANAldehydedehydrogenasefamily3memberB1OS=HomosapiensGN=ALDH3B1PE=1SV=1;tr|A0A087X192|A0A087X192_HUMANAldehydedehy…	229190000	67443000	23131000	82505000	1	190760000	1	33325000	179200000	72715000	8.04538e+07	9.52e+07	0.845103	0.797246
tr|V9GYE3|V9GYE3_HUMANApolipoproteinA-IIOS=HomosapiensGN=APOA2PE=1SV=1;tr|V9GYG9|V9GYG9_HUMANApolipoproteinA-II(Fragment)OS=HomosapiensGN=APOA2PE=1SV=1;sp|P02652|APOA2_HUMANApolipoproteinA-IIOS=HomosapiensGN=APOA2PE=1SV=1;tr|V9GYM3|V9GYM3_HUMANApolipoproteinA-IIOS=HomosapiensGN=APOA2PE=1SV=1;tr|V9GYC1|V9GYC1_HUMANApolipoproteinA-II(Fragment)OS=HomosapiensGN=APOA2PE=1SV=1;tr|V9GYS1|V9GYS1_HUMANApo…	68335000	108940000	561450000	184680000	11293000	106370000	26118000	473630000	80642000	79252000	186939600	153202400	1.22021	0.797362
sp|O14791|APOL1_HUMANApolipoproteinL1OS=HomosapiensGN=APOL1PE=1SV=5;tr|B1AH96|B1AH96_HUMANApolipoproteinL1(Fragment)OS=HomosapiensGN=APOL1PE=1SV=8	1	1	132890000	13669000	1	1	1	102790000	1	1	2.93118e+07	2.0558e+07	1.42581	0.798515
sp|P33176|KINH_HUMANKinesin-1heavychainOS=HomosapiensGN=KIF5BPE=1SV=1;tr|A0A0G2JMZ6|A0A0G2JMZ6_HUMANKinesin-likeprotein(Fragment)OS=HomosapiensGN=KIF5CPE=1SV=1;tr|J3KNA1|J3KNA1_HUMANKinesin-likeproteinOS=HomosapiensGN=KIF5APE=1SV=1;sp|O60282|KIF5C_HUMANKinesinheavychainisoform5COS=HomosapiensGN=KIF5CPE=1SV=1;sp|Q12840|KIF5A_HUMANKinesinheavychainisoform5AOS=HomosapiensGN=KIF5APE=1SV=2;tr|C9JWB9|C…	9598800	5638400	1	7293700	17530000	5770700	1	34422000	8941300	1	8.01218e+06	9.8268e+06	0.81534	0.801879
sp|P17174|AATC_HUMANAspartateaminotransferase,cytoplasmicOS=HomosapiensGN=GOT1PE=1SV=3	1	7543000	1	17778000	1	1	1	1	18771000	1	5.0642e+06	3.7542e+06	1.34894	0.804935
tr|G3V3G2|G3V3G2_HUMANEna/VASP-likeproteinOS=HomosapiensGN=EVLPE=1SV=1;tr|G3V535|G3V535_HUMANEna/VASP-likeproteinOS=HomosapiensGN=EVLPE=1SV=1;tr|A0A087WYI2|A0A087WYI2_HUMANEna/VASP-likeproteinOS=HomosapiensGN=EVLPE=1SV=1	1	1	1	1	8005500	3219900	1	1	5181200	1992700	1.6011e+06	2.07876e+06	0.770219	0.80606
sp|P11586|C1TC_HUMANC-1-tetrahydrofolatesynthase,cytoplasmicOS=HomosapiensGN=MTHFD1PE=1SV=3;tr|V9GYY3|V9GYY3_HUMANC-1-tetrahydrofolatesynthase,cytoplasmic(Fragment)OS=HomosapiensGN=MTHFD1PE=1SV=1	15627000	13699000	5427700	37378000	7036100	28072000	1	7089300	23094000	11203000	15833560	1.38917e+07	1.13979	0.807319
sp|Q9Y295|DRG1_HUMANDevelopmentally-regulatedGTP-bindingprotein1OS=HomosapiensGN=DRG1PE=1SV=1;tr|H0YI06|H0YI06_HUMANDevelopmentally-regulatedGTP-bindingprotein1(Fragment)OS=HomosapiensGN=DRG1PE=1SV=1	3906000	1	1	1	1	1	1	3531200	1686100	1	781201	1.04346e+06	0.748663	0.809159
tr|E7EQJ0|E7EQJ0_HUMANHeterogeneousnuclearribonucleoproteinH(Fragment)OS=HomosapiensGN=HNRNPH1PE=1SV=1;tr|D6RAM1|D6RAM1_HUMANHeterogeneousnuclearribonucleoproteinH(Fragment)OS=HomosapiensGN=HNRNPH1PE=1SV=1;tr|D6R9T0|D6R9T0_HUMANHeterogeneousnuclearribonucleoproteinH(Fragment)OS=HomosapiensGN=HNRNPH1PE=1SV=8;tr|D6RFM3|D6RFM3_HUMANHeterogeneousnuclearribonucleoproteinH(Fragment)OS=HomosapiensGN=HNR…	5934000	1	3244200	13766000	5190000	9619500	1	4091600	9521300	1200300	5.62684e+06	4.88654e+06	1.1515	0.814231
tr|M0R192|M0R192_HUMANFlavinreductase(NADPH)OS=HomosapiensGN=BLVRBPE=1SV=1;sp|P30043|BLVRB_HUMANFlavinreductase(NADPH)OS=HomosapiensGN=BLVRBPE=1SV=3;tr|M0QZL1|M0QZL1_HUMANFlavinreductase(NADPH)OS=HomosapiensGN=BLVRBPE=1SV=1	5815800	13096000	1	14433000	1	1	1	13253000	14526000	1	6.66896e+06	5.5558e+06	1.20036	0.814956
sp|P11226|MBL2_HUMANMannose-bindingproteinCOS=HomosapiensGN=MBL2PE=1SV=2	1	1	25710000	1	1	1	1	1	18199000	1	5.142e+06	3.6398e+06	1.41271	0.817527
sp|Q93034|CUL5_HUMANCullin-5OS=HomosapiensGN=CUL5PE=1SV=4;tr|H0YCA0|H0YCA0_HUMANCullin-5(Fragment)OS=HomosapiensGN=CUL5PE=1SV=1	1	1	1	5274100	1	1	1	1	3749200	1	1.05482e+06	749841	1.40673	0.819621
tr|H0YEU2|H0YEU2_HUMAN40SribosomalproteinS3(Fragment)OS=HomosapiensGN=RPS3PE=1SV=1;tr|E9PL09|E9PL09_HUMAN40SribosomalproteinS3OS=HomosapiensGN=RPS3PE=1SV=1;sp|P23396|RS3_HUMAN40SribosomalproteinS3OS=HomosapiensGN=RPS3PE=1SV=2;tr|E9PPU1|E9PPU1_HUMAN40SribosomalproteinS3OS=HomosapiensGN=RPS3PE=1SV=1;tr|E9PSF4|E9PSF4_HUMAN40SribosomalproteinS3OS=HomosapiensGN=RPS3PE=1SV=1;tr|E9PJN9|E9PJN9_HUMAN40Sri…	28815000	3152500	10187000	57626000	1	21766000	10229000	23370000	11942000	19763000	1.99561e+07	17414000	1.14598	0.82286
tr|E7EQG5|E7EQG5_HUMANCadherin-relatedfamilymember3OS=HomosapiensGN=CDHR3PE=1SV=1;sp|Q6ZTQ4|CDHR3_HUMANCadherin-relatedfamilymember3OS=HomosapiensGN=CDHR3PE=1SV=1;tr|H7C548|H7C548_HUMANCadherin-relatedfamilymember3(Fragment)OS=HomosapiensGN=CDHR3PE=4SV=1;tr|H7C555|H7C555_HUMANCadherin-relatedfamilymember3(Fragment)OS=HomosapiensGN=CDHR3PE=4SV=1	1	1	7302500	1	34069000	1	1	22280000	9960800	1	8.2743e+06	6.44816e+06	1.2832	0.82377
sp|Q12805|FBLN3_HUMANEGF-containingfibulin-likeextracellularmatrixprotein1OS=HomosapiensGN=EFEMP1PE=1SV=2;tr|A0A0U1RQV3|A0A0U1RQV3_HUMANEGF-containingfibulin-likeextracellularmatrixprotein1(Fragment)OS=HomosapiensGN=EFEMP1PE=1SV=1;tr|C9JUM4|C9JUM4_HUMANEGF-containingfibulin-likeextracellularmatrixprotein1(Fragment)OS=HomosapiensGN=EFEMP1PE=1SV=8;tr|C9JQX7|C9JQX7_HUMANEGF-containingfibulin-likeext…	7169200	9915600	5514400	20626000	1	12155000	1	8973500	21639000	6132900	8.64504e+06	9.78008e+06	0.883944	0.823983
sp|O15145|ARPC3_HUMANActin-relatedprotein2/3complexsubunit3OS=HomosapiensGN=ARPC3PE=1SV=3;tr|C9JZD1|C9JZD1_HUMANActin-relatedprotein2/3complexsubunit3(Fragment)OS=HomosapiensGN=ARPC3PE=1SV=1	2465500	17275000	3110400	32828000	17936000	12705000	1	16591000	34636000	1	14722980	1.27864e+07	1.15146	0.825704
sp|P11766|ADHX_HUMANAlcoholdehydrogenaseclass-3OS=HomosapiensGN=ADH5PE=1SV=4;tr|D6RFE4|D6RFE4_HUMANAlcoholdehydrogenaseclass-3OS=HomosapiensGN=ADH5PE=1SV=1;tr|H0YAG8|H0YAG8_HUMANAlcoholdehydrogenaseclass-3(Fragment)OS=HomosapiensGN=ADH5PE=1SV=1;tr|D6RAY0|D6RAY0_HUMANAlcoholdehydrogenaseclass-3OS=HomosapiensGN=ADH5PE=1SV=1;tr|D6R9G2|D6R9G2_HUMANAlcoholdehydrogenaseclass-3OS=HomosapiensGN=ADH5PE=1S…	2941400	5407700	1	6880800	7230000	1	1	1	16290000	2283300	4.49198e+06	3.71466e+06	1.20926	0.827443
sp|P19338|NUCL_HUMANNucleolinOS=HomosapiensGN=NCLPE=1SV=3;tr|H7BY16|H7BY16_HUMANNucleolin(Fragment)OS=HomosapiensGN=NCLPE=1SV=8	1	1	2518700	1	1	1	1	1823200	1	1	503741	364641	1.38147	0.828611
sp|Q9BZQ8|NIBAN_HUMANProteinNibanOS=HomosapiensGN=FAM129APE=1SV=1;tr|H0Y7M9|H0Y7M9_HUMANProteinNiban(Fragment)OS=HomosapiensGN=FAM129APE=1SV=1	31543000	13436000	7096400	24543000	1	1	1	51918000	11774000	1	1.53237e+07	1.27384e+07	1.20295	0.828776
tr|H0YLA4|H0YLA4_HUMANSorbitoldehydrogenaseOS=HomosapiensGN=SORDPE=1SV=1;sp|Q00796|DHSO_HUMANSorbitoldehydrogenaseOS=HomosapiensGN=SORDPE=1SV=4;tr|H0YKB3|H0YKB3_HUMANSorbitoldehydrogenaseOS=HomosapiensGN=SORDPE=1SV=1	1	1	1	1	13092000	1	5609100	11277000	1	1	2.6184e+06	3.37722e+06	0.775312	0.831655
sp|P06310|KV230_HUMANImmunoglobulinkappavariable2-30OS=HomosapiensGN=IGKV2-30PE=3SV=2;sp|A0A075B6S6|KVD30_HUMANImmunoglobulinkappavariable2D-30OS=HomosapiensGN=IGKV2D-30PE=3SV=1	11347000	78122000	219060000	26705000	1	13068000	15990000	14143000	253650000	105070000	6.70468e+07	80384200	0.834079	0.834284
sp|P55072|TERA_HUMANTransitionalendoplasmicreticulumATPaseOS=HomosapiensGN=VCPPE=1SV=4	120920000	97370000	18283000	108240000	7784700	24335000	16461000	190590000	43572000	34431000	70519540	61877800	1.13966	0.835557
sp|P30101|PDIA3_HUMANProteindisulfide-isomeraseA3OS=HomosapiensGN=PDIA3PE=1SV=4	21025000	19699000	10086000	36544000	80668000	12176000	1	54853000	65000000	17143000	33604400	2.98344e+07	1.12636	0.837776
tr|E2QRG8|E2QRG8_HUMANReceptorexpression-enhancingprotein(Fragment)OS=HomosapiensGN=REEP5PE=1SV=1;sp|Q00765|REEP5_HUMANReceptorexpression-enhancingprotein5OS=HomosapiensGN=REEP5PE=1SV=3	1	1	1	4306300	3938700	3093800	1	1	3840600	1	1.649e+06	1.38688e+06	1.189	0.848229
sp|P61586|RHOA_HUMANTransformingproteinRhoAOS=HomosapiensGN=RHOAPE=1SV=1;tr|E9PLA2|E9PLA2_HUMANRho-relatedGTP-bindingproteinRhoCOS=HomosapiensGN=RHOCPE=4SV=1;tr|C9JRM1|C9JRM1_HUMANTransformingproteinRhoAOS=HomosapiensGN=RHOAPE=1SV=1;tr|Q5JR06|Q5JR06_HUMANRho-relatedGTP-bindingproteinRhoC(Fragment)OS=HomosapiensGN=RHOCPE=4SV=8;tr|Q5JR07|Q5JR07_HUMANRho-relatedGTP-bindingproteinRhoC(Fragment)OS=Hom…	1	43109000	4653700	15245000	31677000	21430000	16437000	19201000	18510000	27210000	1.89369e+07	20557600	0.921165	0.850754
tr|F8W1R7|F8W1R7_HUMANMyosinlightpolypeptide6OS=HomosapiensGN=MYL6PE=1SV=1;sp|P60660|MYL6_HUMANMyosinlightpolypeptide6OS=HomosapiensGN=MYL6PE=1SV=2;tr|G3V1V0|G3V1V0_HUMANMyosinlightpolypeptide6OS=HomosapiensGN=MYL6PE=1SV=1;tr|F8VPF3|F8VPF3_HUMANMyosinlightpolypeptide6(Fragment)OS=HomosapiensGN=MYL6PE=1SV=1;tr|J3KND3|J3KND3_HUMANMyosinlightpolypeptide6OS=HomosapiensGN=MYL6PE=1SV=1;tr|G8JLA2|G8JLA2…	233050000	124990000	18643000	123330000	1	75075000	1	389190000	81715000	29243000	1.00003e+08	1.15045e+08	0.869251	0.858743
sp|P00352|AL1A1_HUMANRetinaldehydrogenase1OS=HomosapiensGN=ALDH1A1PE=1SV=2;tr|Q5SYQ7|Q5SYQ7_HUMANRetinaldehydrogenase1(Fragment)OS=HomosapiensGN=ALDH1A1PE=1SV=1;tr|Q5SYQ9|Q5SYQ9_HUMANRetinaldehydrogenase1OS=HomosapiensGN=ALDH1A1PE=1SV=1;tr|Q5SYQ8|Q5SYQ8_HUMANRetinaldehydrogenase1(Fragment)OS=HomosapiensGN=ALDH1A1PE=1SV=1;sp|P30837|AL1B1_HUMANAldehydedehydrogenaseX,mitochondrialOS=HomosapiensGN=AL…	252750000	209520000	20174000	219920000	1	168530000	35349000	37242000	205020000	326310000	1.40473e+08	154490200	0.909267	0.859798
tr|C9JIS1|C9JIS1_HUMANGuaninenucleotide-bindingproteinG(I)/G(S)/G(T)subunitbeta-2(Fragment)OS=HomosapiensGN=GNB2PE=1SV=1;tr|C9JXA5|C9JXA5_HUMANGuaninenucleotide-bindingproteinG(I)/G(S)/G(T)subunitbeta-2(Fragment)OS=HomosapiensGN=GNB2PE=1SV=1;tr|C9JZN1|C9JZN1_HUMANGuaninenucleotide-bindingproteinG(I)/G(S)/G(T)subunitbeta-2(Fragment)OS=HomosapiensGN=GNB2PE=1SV=1;tr|C9JD14|C9JD14_HUMANGuaninenucleot…	216330000	189700000	12307000	43471000	59211000	79347000	16223000	247800000	172300000	58166000	104203800	114767200	0.907958	0.861961
sp|P01031|CO5_HUMANComplementC5OS=HomosapiensGN=C5PE=1SV=4;CON__Q1A7A4	35050000	39176000	308480000	51847000	16801000	199900000	21544000	23250000	74932000	74523000	90270800	78829800	1.14514	0.861975
sp|Q99828|CIB1_HUMANCalciumandintegrin-bindingprotein1OS=HomosapiensGN=CIB1PE=1SV=4	94363000	63339000	1	23860000	28807000	41442000	1	119030000	25521000	46932000	4.20738e+07	4.6585e+07	0.903162	0.86574
sp|P62873|GBB1_HUMANGuaninenucleotide-bindingproteinG(I)/G(S)/G(T)subunitbeta-1OS=HomosapiensGN=GNB1PE=1SV=3;tr|B1AKQ8|B1AKQ8_HUMANGuaninenucleotide-bindingproteinG(I)/G(S)/G(T)subunitbeta-1(Fragment)OS=HomosapiensGN=GNB1PE=1SV=8;tr|F6X3N5|F6X3N5_HUMANGuaninenucleotide-bindingproteinG(I)/G(S)/G(T)subunitbeta-1(Fragment)OS=HomosapiensGN=GNB1PE=1SV=1;tr|F6UT28|F6UT28_HUMANGuaninenucleotide-bindingp…	80999000	26246000	16482000	12294000	27564000	19198000	1	91780000	22250000	12991000	32717000	2.92438e+07	1.11877	0.868544
sp|P09211|GSTP1_HUMANGlutathioneS-transferasePOS=HomosapiensGN=GSTP1PE=1SV=2;tr|A8MX94|A8MX94_HUMANGlutathioneS-transferasePOS=HomosapiensGN=GSTP1PE=1SV=1;tr|A0A087X2E9|A0A087X2E9_HUMANGlutathioneS-transferaseP(Fragment)OS=HomosapiensGN=GSTP1PE=1SV=1;tr|A0A087X243|A0A087X243_HUMANGlutathioneS-transferaseP(Fragment)OS=HomosapiensGN=GSTP1PE=1SV=1	61958000	219510000	42783000	597560000	13241000	31227000	57345000	75005000	280680000	615090000	187010400	211869400	0.882668	0.876341
sp|O60603|TLR2_HUMANToll-likereceptor2OS=HomosapiensGN=TLR2PE=1SV=1	1	1	1	5822600	1	1	1	3206800	3701000	1	1.16452e+06	1.38156e+06	0.842902	0.884047
sp|P06737|PYGL_HUMANGlycogenphosphorylase,liverformOS=HomosapiensGN=PYGLPE=1SV=4;tr|E9PK47|E9PK47_HUMANAlpha-1,4glucanphosphorylaseOS=HomosapiensGN=PYGLPE=1SV=1;sp|P11217|PYGM_HUMANGlycogenphosphorylase,muscleformOS=HomosapiensGN=PYGMPE=1SV=6	72835000	214290000	11143000	35219000	24124000	15708000	7407200	257100000	17736000	14279000	71522200	62446040	1.14534	0.885855
sp|P11142|HSP7C_HUMANHeatshockcognate71kDaproteinOS=HomosapiensGN=HSPA8PE=1SV=1;tr|E9PKE3|E9PKE3_HUMANHeatshockcognate71kDaproteinOS=HomosapiensGN=HSPA8PE=1SV=1;tr|E9PNE6|E9PNE6_HUMANHeatshockcognate71kDaproteinOS=HomosapiensGN=HSPA8PE=1SV=1;tr|E9PLF4|E9PLF4_HUMANHeatshockcognate71kDaprotein(Fragment)OS=HomosapiensGN=HSPA8PE=1SV=1;tr|E9PN89|E9PN89_HUMANHeatshockcognate71kDaprotein(Fragment)OS=Hom…	204170000	208700000	38178000	389230000	56996000	145910000	312330000	30642000	245540000	220980000	179454800	191080400	0.939159	0.887515
sp|Q14152|EIF3A_HUMANEukaryotictranslationinitiationfactor3subunitAOS=HomosapiensGN=EIF3APE=1SV=1	20661000	6670000	1	16919000	1	17500000	1	7717700	14949000	1	8.85e+06	8.03334e+06	1.10166	0.88814
sp|P02748|CO9_HUMANComplementcomponentC9OS=HomosapiensGN=C9PE=1SV=2;CON__Q3MHN2	45398000	38931000	55136000	23841000	1	15284000	1	19773000	80716000	60550000	3.26612e+07	3.52646e+07	0.926175	0.888228
sp|P55060|XPO2_HUMANExportin-2OS=HomosapiensGN=CSE1LPE=1SV=3	14784000	5198400	1	7329700	1	3479600	6967800	13798000	5626600	1	5.46242e+06	5.9744e+06	0.914304	0.889395
sp|P24752|THIL_HUMANAcetyl-CoAacetyltransferase,mitochondrialOS=HomosapiensGN=ACAT1PE=1SV=1	1	1	1	3691300	1	1204800	1	1	1887400	1	738261	618441	1.19375	0.889672
sp|P14618|KPYM_HUMANPyruvatekinasePKMOS=HomosapiensGN=PKMPE=1SV=4;tr|H3BTN5|H3BTN5_HUMANPyruvatekinase(Fragment)OS=HomosapiensGN=PKMPE=1SV=1;tr|B4DNK4|B4DNK4_HUMANPyruvatekinaseOS=HomosapiensGN=PKMPE=1SV=1;tr|H3BQ34|H3BQ34_HUMANPyruvatekinaseOS=HomosapiensGN=PKMPE=1SV=1;tr|H3BR70|H3BR70_HUMANPyruvatekinaseOS=HomosapiensGN=PKMPE=1SV=1;tr|H3BT25|H3BT25_HUMANPyruvatekinasePKM(Fragment)OS=Homosapiens…	922530000	697650000	117190000	500840000	39002000	400120000	319630000	776410000	505420000	405390000	455442400	481394000	0.946091	0.892559
sp|O95865|DDAH2_HUMANN(G),N(G)-dimethylargininedimethylaminohydrolase2OS=HomosapiensGN=DDAH2PE=1SV=1	12599000	11473000	1	11505000	1	7324400	5097400	1	11343000	9477300	7.1154e+06	6.64842e+06	1.07024	0.897505
sp|P04004|VTNC_HUMANVitronectinOS=HomosapiensGN=VTNPE=1SV=1;tr|F5GX75|F5GX75_HUMANVitronectin(Fragment)OS=HomosapiensGN=VTNPE=1SV=2;tr|H0YJW9|H0YJW9_HUMANUncharacterizedprotein(Fragment)OS=HomosapiensPE=1SV=3	67098000	26102000	482840000	40027000	1	3721500	14821000	449790000	63341000	2679200	1.23213e+08	106870540	1.15292	0.899362
tr|H0YLH3|H0YLH3_HUMANGeranylgeranyltransferasetype-2subunitalphaOS=HomosapiensGN=RABGGTAPE=1SV=1;sp|Q92696|PGTA_HUMANGeranylgeranyltransferasetype-2subunitalphaOS=HomosapiensGN=RABGGTAPE=1SV=2;tr|H0YKZ8|H0YKZ8_HUMANGeranylgeranyltransferasetype-2subunitalpha(Fragment)OS=HomosapiensGN=RABGGTAPE=1SV=1;tr|H0YMG5|H0YMG5_HUMANGeranylgeranyltransferasetype-2subunitalpha(Fragment)OS=HomosapiensGN=RABGG…	11742000	1	1	1	1	1	1	5767800	6686400	1077800	2.3484e+06	2.7064e+06	0.867721	0.900148
sp|Q9P2X0|DPM3_HUMANDolichol-phosphatemannosyltransferasesubunit3OS=HomosapiensGN=DPM3PE=1SV=2	1	1	1	2789400	1	1	1	1	2329300	1	557881	465861	1.19753	0.902375
tr|E9PRV0|E9PRV0_HUMANVacuolarproteinsorting-associatedprotein51homolog(Fragment)OS=HomosapiensGN=VPS51PE=1SV=1;tr|E9PJ36|E9PJ36_HUMANVacuolarproteinsorting-associatedprotein51homolog(Fragment)OS=HomosapiensGN=VPS51PE=1SV=1;tr|E9PKX7|E9PKX7_HUMANVacuolarproteinsorting-associatedprotein51homolog(Fragment)OS=HomosapiensGN=VPS51PE=1SV=1;sp|Q9UID3|VPS51_HUMANVacuolarproteinsorting-associatedprotein51…	1	1	1	3017900	1	1	1	3604700	1	1	603581	720941	0.837213	0.903747
sp|P13796|PLSL_HUMANPlastin-2OS=HomosapiensGN=LCP1PE=1SV=6;tr|Q5TBN3|Q5TBN3_HUMANPlastin-2(Fragment)OS=HomosapiensGN=LCP1PE=1SV=1;tr|Q5TBN5|Q5TBN5_HUMANPlastin-2(Fragment)OS=HomosapiensGN=LCP1PE=1SV=1	359020000	1526400000	167470000	1230000000	151290000	388650000	262090000	374400000	762070000	1426300000	686836000	642702000	1.06867	0.905116
tr|Q30118|Q30118_HUMANHLAclassIIhistocompatibilityantigen,DRalphachainOS=HomosapiensGN=HLA-DRAPE=1SV=1;tr|A0A0G2JH46|A0A0G2JH46_HUMANHLAclassIIhistocompatibilityantigen,DRalphachainOS=HomosapiensGN=HLA-DRAPE=1SV=1;tr|A0A0G2JMH6|A0A0G2JMH6_HUMANHLAclassIIhistocompatibilityantigen,DRalphachainOS=HomosapiensGN=HLA-DRAPE=1SV=1;sp|P01903|DRA_HUMANHLAclassIIhistocompatibilityantigen,DRalphachainOS=Homo…	12155000	101720000	9009700	87672000	43435000	76235000	26603000	47856000	47327000	67493000	50798340	53102800	0.956604	0.914994
tr|Q5JP53|Q5JP53_HUMANTubulinbetachainOS=HomosapiensGN=TUBBPE=1SV=1;sp|P07437|TBB5_HUMANTubulinbetachainOS=HomosapiensGN=TUBBPE=1SV=2;tr|Q5ST81|Q5ST81_HUMANTubulinbetachainOS=HomosapiensGN=TUBBPE=1SV=1;sp|Q9BVA1|TBB2B_HUMANTubulinbeta-2BchainOS=HomosapiensGN=TUBB2BPE=1SV=1;sp|A6NNZ2|TBB8L_HUMANTubulinbeta-8chain-likeproteinLOC260334OS=HomosapiensPE=1SV=1;sp|Q9H4B7|TBB1_HUMANTubulinbeta-1chainOS=H…	42365000	22980000	31491000	57034000	1	25102000	40981000	60403000	22191000	11885000	3.0774e+07	32112400	0.958321	0.919189
tr|K7EKI8|K7EKI8_HUMANPeriplakinOS=HomosapiensGN=PPLPE=1SV=1;sp|O60437|PEPL_HUMANPeriplakinOS=HomosapiensGN=PPLPE=1SV=4;tr|K7EQ71|K7EQ71_HUMANPeriplakin(Fragment)OS=HomosapiensGN=PPLPE=1SV=1	1	1	8950700	1	1	4525100	1	1	3401400	1	1.79014e+06	1.5853e+06	1.12921	0.922645
tr|F5H442|F5H442_HUMANTumorsusceptibilitygene101proteinOS=HomosapiensGN=TSG101PE=1SV=1;sp|Q99816|TS101_HUMANTumorsusceptibilitygene101proteinOS=HomosapiensGN=TSG101PE=1SV=2	6098000	7770200	8047700	1	6512400	10840000	1	14996000	3735800	481350	5.68566e+06	6.01063e+06	0.945934	0.924192
sp|P05109|S10A8_HUMANProteinS100-A8OS=HomosapiensGN=S100A8PE=1SV=1	112770000	100630000	23087000	46777000	2394300000	37100000	67533000	2160200000	45221000	64194000	535512800	474849600	1.12775	0.925365
sp|O14744|ANM5_HUMANProteinarginineN-methyltransferase5OS=HomosapiensGN=PRMT5PE=1SV=4;tr|G3V580|G3V580_HUMANProteinarginineN-methyltransferase5(Fragment)OS=HomosapiensGN=PRMT5PE=1SV=1;tr|G3V2L6|G3V2L6_HUMANProteinarginineN-methyltransferase5(Fragment)OS=HomosapiensGN=PRMT5PE=1SV=1;tr|G3V5L5|G3V5L5_HUMANProteinarginineN-methyltransferase5(Fragment)OS=HomosapiensGN=PRMT5PE=1SV=8;tr|C9JSX3|C9JSX3_HU…	6063900	5170900	1	2235200	1	1	1	1	15043000	1	2.694e+06	3.0086e+06	0.895433	0.925616
tr|B1AK87|B1AK87_HUMANCappingprotein(Actinfilament)muscleZ-line,beta,isoformCRA_aOS=HomosapiensGN=CAPZBPE=1SV=1;tr|B1AK88|B1AK88_HUMANCappingprotein(Actinfilament)muscleZ-line,beta,isoformCRA_dOS=HomosapiensGN=CAPZBPE=1SV=1	27237000	56551000	16722000	72526000	1	60527000	25236000	15691000	33759000	31344000	3.46072e+07	33311400	1.0389	0.934093
sp|P09960|LKHA4_HUMANLeukotrieneA-4hydrolaseOS=HomosapiensGN=LTA4HPE=1SV=2;tr|B4DEH5|B4DEH5_HUMANLeukotrieneA-4hydrolaseOS=HomosapiensGN=LTA4HPE=1SV=1	342120000	424550000	23898000	616630000	75403000	354060000	519840000	164310000	236060000	258930000	296520200	306640000	0.966998	0.938139
sp|P00338|LDHA_HUMANL-lactatedehydrogenaseAchainOS=HomosapiensGN=LDHAPE=1SV=2;tr|F5GYU2|F5GYU2_HUMANL-lactatedehydrogenaseAchain(Fragment)OS=HomosapiensGN=LDHAPE=1SV=1;tr|F5GXY2|F5GXY2_HUMANL-lactatedehydrogenaseAchain(Fragment)OS=HomosapiensGN=LDHAPE=1SV=8;tr|F5GXH2|F5GXH2_HUMANL-lactatedehydrogenaseAchain(Fragment)OS=HomosapiensGN=LDHAPE=1SV=1;tr|F5H5J4|F5H5J4_HUMANL-lactatedehydrogenaseAchainO…	347290000	253040000	31401000	315780000	195530000	229110000	131870000	593380000	109640000	36019000	228608200	220003800	1.03911	0.941194
sp|P67936|TPM4_HUMANTropomyosinalpha-4chainOS=HomosapiensGN=TPM4PE=1SV=3;tr|K7EMU5|K7EMU5_HUMANTropomyosinalpha-4chain(Fragment)OS=HomosapiensGN=TPM4PE=1SV=1;tr|K7EPB9|K7EPB9_HUMANTropomyosinalpha-4chain(Fragment)OS=HomosapiensGN=TPM4PE=1SV=1;tr|K7ENT6|K7ENT6_HUMANTropomyosinalpha-4chain(Fragment)OS=HomosapiensGN=TPM4PE=1SV=1;tr|Q5TCU3|Q5TCU3_HUMANTropomyosinbetachainOS=HomosapiensGN=TPM2PE=1SV=1…	17609000	18989000	4330400	11538000	28130000	73821000	1	3314600	7142000	1864500	16119280	1.72284e+07	0.935621	0.941867
sp|Q9Y263|PLAP_HUMANPhospholipaseA-2-activatingproteinOS=HomosapiensGN=PLAAPE=1SV=2;tr|E5RIM3|E5RIM3_HUMANPhospholipaseA-2-activatingproteinOS=HomosapiensGN=PLAAPE=1SV=1;tr|H0YAU9|H0YAU9_HUMANPhospholipaseA-2-activatingprotein(Fragment)OS=HomosapiensGN=PLAAPE=1SV=1;tr|H0YBW4|H0YBW4_HUMANPhospholipaseA-2-activatingprotein(Fragment)OS=HomosapiensGN=PLAAPE=1SV=1	2737100	1761800	1329800	2748500	1	4203500	1	1	3138600	1566900	1.71544e+06	1.7818e+06	0.962757	0.947807
sp|Q9NVJ2|ARL8B_HUMANADP-ribosylationfactor-likeprotein8BOS=HomosapiensGN=ARL8BPE=1SV=1	1	28566000	4620900	23537000	19548000	271560	3823300	60947000	6906600	1	1.52544e+07	1.43897e+07	1.06009	0.948384
sp|P11215|ITAM_HUMANIntegrinalpha-MOS=HomosapiensGN=ITGAMPE=1SV=2;sp|Q13349|ITAD_HUMANIntegrinalpha-DOS=HomosapiensGN=ITGADPE=1SV=2	44204000	182070000	5935500	40708000	3720400	1	1	256460000	2198000	1	55327580	5.17316e+07	1.06951	0.954278
sp|P68871|HBB_HUMANHemoglobinsubunitbetaOS=HomosapiensGN=HBBPE=1SV=2;tr|F8W6P5|F8W6P5_HUMANHemoglobinsubunitbeta(Fragment)OS=HomosapiensGN=HBBPE=1SV=1;tr|A0A0J9YWK4|A0A0J9YWK4_HUMANHemoglobinsubunitbetaOS=HomosapiensGN=HBBPE=1SV=1	255190000	264860000	979870000	2074700000	568130000	1143400000	474900000	372890000	1791300000	487800000	828550000	854058000	0.970133	0.954541
sp|Q14894|CRYM_HUMANKetiminereductasemu-crystallinOS=HomosapiensGN=CRYMPE=1SV=1;tr|I3L325|I3L325_HUMANKetiminereductasemu-crystallin(Fragment)OS=HomosapiensGN=CRYMPE=1SV=1;tr|I3L3Y1|I3L3Y1_HUMANKetiminereductasemu-crystallin(Fragment)OS=HomosapiensGN=CRYMPE=1SV=1;tr|I3NI53|I3NI53_HUMANKetiminereductasemu-crystallin(Fragment)OS=HomosapiensGN=CRYMPE=1SV=1;tr|I3L2W5|I3L2W5_HUMANKetiminereductasemu-c…	23591000	48427000	5660200	53169000	1	3709500	4433700	27810000	98223000	2517100	2.61694e+07	27338660	0.957232	0.957539
sp|P02675|FIBB_HUMANFibrinogenbetachainOS=HomosapiensGN=FGBPE=1SV=2;tr|D6REL8|D6REL8_HUMANFibrinogenbetachainOS=HomosapiensGN=FGBPE=1SV=1;CON__P02676	166540000	43837000	252570000	85243000	58029000	53113000	57217000	272320000	209510000	31119000	121243800	124655800	0.972629	0.957769
sp|O15144|ARPC2_HUMANActin-relatedprotein2/3complexsubunit2OS=HomosapiensGN=ARPC2PE=1SV=1;tr|C9JTV5|C9JTV5_HUMANArp2/3complex34kDasubunit(Fragment)OS=HomosapiensGN=ARPC2PE=1SV=8;tr|G5E9J0|G5E9J0_HUMANArp2/3complex34kDasubunitOS=HomosapiensGN=ARPC2PE=1SV=1;tr|G5E9S7|G5E9S7_HUMANActinrelatedprotein2/3complex,subunit2,34kDa,isoformCRA_eOS=HomosapiensGN=ARPC2PE=1SV=1;tr|H7C3F9|H7C3F9_HUMANArp2/3compl…	67885000	68735000	15409000	98334000	86017000	75550000	41831000	93887000	59820000	69629000	67276000	68143400	0.987271	0.95953
tr|B4E1Z4|B4E1Z4_HUMANcDNAFLJ55673,highlysimilartoComplementfactorB(EC3.4.21.47)OS=HomosapiensPE=1SV=1;tr|E7ETN3|E7ETN3_HUMANUncharacterizedproteinOS=HomosapiensPE=1SV=1;sp|P00751|CFAB_HUMANComplementfactorBOS=HomosapiensGN=CFBPE=1SV=2;tr|H7C5H1|H7C5H1_HUMANComplementfactorB(Fragment)OS=HomosapiensGN=CFBPE=1SV=1;tr|A0A0G2JH38|A0A0G2JH38_HUMANComplementfactorB(Fragment)OS=HomosapiensGN=CFBPE=3SV=1…	46108000	187750000	417160000	55294000	8191800	15215000	205830000	66599000	205160000	241180000	142900760	146796800	0.97346	0.965445
sp|Q96QK1|VPS35_HUMANVacuolarproteinsorting-associatedprotein35OS=HomosapiensGN=VPS35PE=1SV=2;tr|I3L4S0|I3L4S0_HUMANVacuolarproteinsorting-associatedprotein35OS=HomosapiensGN=VPS35PE=1SV=1;tr|A0A1W2PP10|A0A1W2PP10_HUMANVacuolarproteinsorting-associatedprotein35OS=HomosapiensGN=VPS35PE=1SV=1;tr|I3L4P4|I3L4P4_HUMANVacuolarproteinsorting-associatedprotein35OS=HomosapiensGN=VPS35PE=1SV=1	20473000	14532000	7211100	20877000	1	16368000	1	1	40419000	8033100	1.26186e+07	1.2964e+07	0.973357	0.968613
sp|P39023|RL3_HUMAN60SribosomalproteinL3OS=HomosapiensGN=RPL3PE=1SV=2;tr|F8WCR1|F8WCR1_HUMAN60SribosomalproteinL3OS=HomosapiensGN=RPL3PE=1SV=1;tr|H7C3M2|H7C3M2_HUMAN60SribosomalproteinL3(Fragment)OS=HomosapiensGN=RPL3PE=1SV=1;tr|B5MCW2|B5MCW2_HUMAN60SribosomalproteinL3(Fragment)OS=HomosapiensGN=RPL3PE=1SV=1;tr|H7C422|H7C422_HUMAN60SribosomalproteinL3(Fragment)OS=HomosapiensGN=RPL3PE=1SV=1;tr|G5E9…	12130000	3111400	5748200	11260000	1	14216000	1	10158000	8487200	1	6.44992e+06	6.57224e+06	0.981388	0.974257
tr|A0A087WVM2|A0A087WVM2_HUMANCD177antigenOS=HomosapiensGN=CD177PE=1SV=1;sp|Q8N6Q3|CD177_HUMANCD177antigenOS=HomosapiensGN=CD177PE=1SV=2	22776000	11414000	1	1	1	1	1	32870000	1	1	6.838e+06	6.574e+06	1.04016	0.974479
sp|P01859|IGHG2_HUMANImmunoglobulinheavyconstantgamma2OS=HomosapiensGN=IGHG2PE=1SV=2	26579000	25279000	752640000	31681000	7966100	46026000	58669000	6785300	243660000	515270000	168829020	174082060	0.969824	0.976651
sp|P04843|RPN1_HUMANDolichyl-diphosphooligosaccharide--proteinglycosyltransferasesubunit1OS=HomosapiensGN=RPN1PE=1SV=1;tr|B7Z4L4|B7Z4L4_HUMANDolichyl-diphosphooligosaccharide--proteinglycosyltransferasesubunit1OS=HomosapiensGN=RPN1PE=1SV=1;tr|F8WF32|F8WF32_HUMANDolichyl-diphosphooligosaccharide--proteinglycosyltransferasesubunit1OS=HomosapiensGN=RPN1PE=1SV=1	17210000	14101000	1	14833000	2982800	1	1	47684000	1477700	1323700	9.82536e+06	1.00971e+07	0.973089	0.979036
sp|P51692|STA5B_HUMANSignaltransducerandactivatoroftranscription5BOS=HomosapiensGN=STAT5BPE=1SV=2;tr|K7EIF9|K7EIF9_HUMANSignaltransducerandactivatoroftranscription5A(Fragment)OS=HomosapiensGN=STAT5APE=1SV=2;tr|K7EK35|K7EK35_HUMANSignaltransducerandactivatoroftranscriptionOS=HomosapiensGN=STAT5APE=1SV=1;sp|P42229|STA5A_HUMANSignaltransducerandactivatoroftranscription5AOS=HomosapiensGN=STAT5APE=1SV…	1	1	1	5979800	1	1	1	5785000	1	1	1.19596e+06	1.157e+06	1.03367	0.981894
sp|Q08380|LG3BP_HUMANGalectin-3-bindingproteinOS=HomosapiensGN=LGALS3BPPE=1SV=1;tr|K7ESM3|K7ESM3_HUMANGalectin-3-bindingprotein(Fragment)OS=HomosapiensGN=LGALS3BPPE=1SV=1;tr|K7EKQ5|K7EKQ5_HUMANGalectin-3-bindingproteinOS=HomosapiensGN=LGALS3BPPE=1SV=1;tr|K7EP36|K7EP36_HUMANGalectin-3-bindingprotein(Fragment)OS=HomosapiensGN=LGALS3BPPE=1SV=1;tr|K7EJY8|K7EJY8_HUMANGalectin-3-bindingprotein(Fragment…	54403000	120910000	62452000	99700000	33594000	23594000	54719000	33258000	60786000	202040000	74211800	74879400	0.991084	0.985721
sp|Q16555|DPYL2_HUMANDihydropyrimidinase-relatedprotein2OS=HomosapiensGN=DPYSL2PE=1SV=1;tr|A0A1C7CYX9|A0A1C7CYX9_HUMANDihydropyrimidinase-relatedprotein2OS=HomosapiensGN=DPYSL2PE=1SV=1;tr|E5RFU4|E5RFU4_HUMANDihydropyrimidinase-relatedprotein2(Fragment)OS=HomosapiensGN=DPYSL2PE=1SV=1;tr|E9PD68|E9PD68_HUMANDihydropyrimidinase-relatedprotein1OS=HomosapiensGN=CRMP1PE=1SV=1;sp|Q14194|DPYL1_HUMANDihydr…	1	86624000	1942200	27338000	1	19065000	47864000	12981000	33040000	4572300	2.31808e+07	23504460	0.986232	0.986368
tr|D6RHD7|D6RHD7_HUMANCalcyphosin-likeproteinOS=HomosapiensGN=CAPSLPE=1SV=1;tr|D6RF97|D6RF97_HUMANCalcyphosin-likeprotein(Fragment)OS=HomosapiensGN=CAPSLPE=1SV=1;sp|Q8WWF8|CAPSL_HUMANCalcyphosin-likeproteinOS=HomosapiensGN=CAPSLPE=2SV=4	1	1	1	1711400	1	1	1744500	1	1	1	342281	348901	0.981026	0.989525
sp|Q9Y624|JAM1_HUMANJunctionaladhesionmoleculeAOS=HomosapiensGN=F11RPE=1SV=1;tr|A0A087WY82|A0A087WY82_HUMANJunctionaladhesionmoleculeAOS=HomosapiensGN=F11RPE=1SV=1	18704000	15217000	1	21976000	1	14484000	1	23032000	8478600	9735800	1.11794e+07	1.11461e+07	1.00299	0.99572
sp|P01008|ANT3_HUMANAntithrombin-IIIOS=HomosapiensGN=SERPINC1PE=1SV=1;tr|Q8TCE1|Q8TCE1_HUMANAntithrombin-IIIOS=HomosapiensGN=SERPINC1PE=1SV=1;CON__P41361	44381000	125070000	280530000	34856000	1	26730000	14190000	41999000	147590000	255580000	9.69674e+07	97217800	0.997424	0.997161
sp|P13797|PLST_HUMANPlastin-3OS=HomosapiensGN=PLS3PE=1SV=4;tr|A0A0A0MSQ0|A0A0A0MSQ0_HUMANPlastin-3OS=HomosapiensGN=PLS3PE=1SV=1;tr|U3KQI3|U3KQI3_HUMANPlastin-3(Fragment)OS=HomosapiensGN=PLS3PE=1SV=1;tr|F2Z2Z9|F2Z2Z9_HUMANPlastin-3OS=HomosapiensGN=PLS3PE=1SV=1	1	8643000	1	4966800	1	1	1	1	13600000	1	2.72196e+06	2.72e+06	1.00072	0.999533
