# Supplementary material
Source: HighWire-hosted journal article supplement (https://thorax.bmj.com/content/75/6/449)
Supplement: inline-supplementary-material-8 [file inline-supplementary-material-8.xlsx]

## Sheet: CorrelationAll
Heading	CF Group2	CF Group 2	CF group 2	CF Group 2	CF Group 2	Con Group2	Con Group2	Con Group2	Con Group2	Con Group2	Pearson: Protein Int vs IL8	P value- Pearson		Protein intensity values identified by MS compared to Elisa IL-8 from same patients (pearson)
IL-8 Values/Elisa-same patient as MS	1656.09	192.1	62.33	1002.66	1804.59	266.63	141.57	0	226.201	92	0			Protein List is from Supplementary table 4 (paediatric vs control)
MS intensities (LFQ) for paediatric proteins and controls-Grp2
sp|P60709|ACTB_HUMANActin,cytoplasmic1OS=HomosapiensGN=ACTBPE=1SV=1;tr|G5E9R0|G5E9R0_HUMANActin,cytoplasmic1OS=HomosapiensGN=ACTBPE=1SV=1;tr|E7EVS6|E7EVS6_HUMANActin,cytoplasmic1(Fragment)OS=HomosapiensGN=ACTBPE=1SV=8;tr|C9JTX5|C9JTX5_HUMANActin,cytoplasmic1(Fragment)OS=HomosapiensGN=ACTBPE=1SV=1;tr|C9JZR7|C9JZR7_HUMANActin,cytoplasmic1(Fragment)OS=HomosapiensGN=ACTBPE=1SV=8;tr|C9JUM1|C9JUM1_HUMA…	1	1	1	63808000	1	587280000	551360000	701220000	501010000	1084300000	-0.579705	#NUM!
tr|B4DQI4|B4DQI4_HUMANProteinABHD14BOS=HomosapiensGN=ABHD14BPE=1SV=1;tr|F8W9U3|F8W9U3_HUMANProteinABHD14BOS=HomosapiensGN=ABHD14BPE=1SV=1;sp|Q96IU4|ABHEB_HUMANProteinABHD14BOS=HomosapiensGN=ABHD14BPE=1SV=1	1	1	1	5107900	1	39920000	39463000	74799000	55086000	25872000	-0.561641	#NUM!
sp|P02679|FIBG_HUMANFibrinogengammachainOS=HomosapiensGN=FGGPE=1SV=3;tr|C9JEU5|C9JEU5_HUMANFibrinogengammachainOS=HomosapiensGN=FGGPE=1SV=1;tr|C9JC84|C9JC84_HUMANFibrinogengammachainOS=HomosapiensGN=FGGPE=1SV=1;tr|C9JPQ9|C9JPQ9_HUMANFibrinogengammachain(Fragment)OS=HomosapiensGN=FGGPE=1SV=1;tr|C9JU00|C9JU00_HUMANFibrinogengammachain(Fragment)OS=HomosapiensGN=FGGPE=1SV=1	30289000	7871700	33234000	26670000	1	88083000	132740000	110800000	77083000	61796000	-0.594852	#NUM!		only get p value when correlation positive
sp|P30740|ILEU_HUMANLeukocyteelastaseinhibitorOS=HomosapiensGN=SERPINB1PE=1SV=1	20277000	8900400	31165000	60607000	1	190630000	156210000	346940000	156420000	387820000	-0.576125	#NUM!
sp|P50990|TCPQ_HUMANT-complexprotein1subunitthetaOS=HomosapiensGN=CCT8PE=1SV=4;tr|H7C4C8|H7C4C8_HUMANT-complexprotein1subunittheta(Fragment)OS=HomosapiensGN=CCT8PE=1SV=1;tr|H7C2U0|H7C2U0_HUMANT-complexprotein1subunittheta(Fragment)OS=HomosapiensGN=CCT8PE=1SV=1	1	1	3380700	1	1	18804000	23110000	55754000	43742000	16159000	-0.549493	#NUM!
sp|P25788|PSA3_HUMANProteasomesubunitalphatype-3OS=HomosapiensGN=PSMA3PE=1SV=2;tr|G3V3W4|G3V3W4_HUMANProteasomesubunitalphatype-3OS=HomosapiensGN=PSMA3PE=1SV=1;tr|G3V5N4|G3V5N4_HUMANProteasomesubunitalphatype-3OS=HomosapiensGN=PSMA3PE=1SV=1;tr|G3V4X5|G3V4X5_HUMANProteasomeendopeptidasecomplexOS=HomosapiensGN=PSMA3PE=1SV=1	14603000	1	4993900	1	1	46112000	11084000	37681000	55478000	74703000	-0.451914	#NUM!
sp|P07355|ANXA2_HUMANAnnexinA2OS=HomosapiensGN=ANXA2PE=1SV=2;tr|H0YN42|H0YN42_HUMANAnnexin(Fragment)OS=HomosapiensGN=ANXA2PE=1SV=1;tr|H0YMD0|H0YMD0_HUMANAnnexin(Fragment)OS=HomosapiensGN=ANXA2PE=1SV=1;tr|H0YMU9|H0YMU9_HUMANAnnexinOS=HomosapiensGN=ANXA2PE=1SV=1;sp|A6NMY6|AXA2L_HUMANPutativeannexinA2-likeproteinOS=HomosapiensGN=ANXA2P2PE=5SV=2;tr|H0YKS4|H0YKS4_HUMANAnnexin(Fragment)OS=HomosapiensGN…	285120000	537480000	494940000	727450000	56118000	1278400000	997050000	629550000	1535900000	1309500000	-0.63601	#NUM!
sp|P04083|ANXA1_HUMANAnnexinA1OS=HomosapiensGN=ANXA1PE=1SV=2;tr|Q5T3N1|Q5T3N1_HUMANAnnexin(Fragment)OS=HomosapiensGN=ANXA1PE=1SV=1;tr|Q5T3N0|Q5T3N0_HUMANAnnexin(Fragment)OS=HomosapiensGN=ANXA1PE=1SV=1	381510000	429240000	24616000	444580000	284300000	2764300000	900780000	5338200000	2678600000	3414600000	-0.509715	#NUM!
sp|Q9ULV0|MYO5B_HUMANUnconventionalmyosin-VbOS=HomosapiensGN=MYO5BPE=1SV=3;tr|A0A0A0MR36|A0A0A0MR36_HUMANUnconventionalmyosin-Vb(Fragment)OS=HomosapiensGN=MYO5BPE=1SV=1;tr|H0YM93|H0YM93_HUMANUnconventionalmyosin-Vc(Fragment)OS=HomosapiensGN=MYO5CPE=1SV=1;tr|H0YMK3|H0YMK3_HUMANUnconventionalmyosin-VcOS=HomosapiensGN=MYO5CPE=1SV=1;sp|Q9NQX4|MYO5C_HUMANUnconventionalmyosin-VcOS=HomosapiensGN=MYO5CPE…	300430000	59627000	276170000	96351000	127670000	1	1	7461900	1	1	0.533409	0.104805
sp|P29508|SPB3_HUMANSerpinB3OS=HomosapiensGN=SERPINB3PE=1SV=2	26409000	11861000	9621600	38913000	1	136610000	100540000	40353000	198760000	85800000	-0.41136	#NUM!
sp|P49257|LMAN1_HUMANProteinERGIC-53OS=HomosapiensGN=LMAN1PE=1SV=2	27649000	18486000	1	24980000	14546000	1	1	1	1678800	1	0.756024	0.00847401
tr|Q5SZU1|Q5SZU1_HUMAND-3-phosphoglyceratedehydrogenaseOS=HomosapiensGN=PHGDHPE=1SV=1;sp|O43175|SERA_HUMAND-3-phosphoglyceratedehydrogenaseOS=HomosapiensGN=PHGDHPE=1SV=4	15743000	19227000	17248000	15571000	1	1	1	1	6171500	1	0.14475	0.687776
tr|K7EQA9|K7EQA9_HUMANHsp90co-chaperoneCdc37(Fragment)OS=HomosapiensGN=CDC37PE=1SV=1;sp|Q16543|CDC37_HUMANHsp90co-chaperoneCdc37OS=HomosapiensGN=CDC37PE=1SV=1;tr|K7EKQ2|K7EKQ2_HUMANHsp90co-chaperoneCdc37(Fragment)OS=HomosapiensGN=CDC37PE=1SV=1;tr|K7EIU0|K7EIU0_HUMANHsp90co-chaperoneCdc37(Fragment)OS=HomosapiensGN=CDC37PE=1SV=1;tr|K7EL68|K7EL68_HUMANHsp90co-chaperoneCdc37(Fragment)OS=HomosapiensGN…	1	1	1	793990	1748500	18536000	20805000	29284000	13722000	1	-0.457226	#NUM!
tr|C9JWL6|C9JWL6_HUMANCyclin-dependentkinase14(Fragment)OS=HomosapiensGN=CDK14PE=1SV=1;tr|F8WF96|F8WF96_HUMANCyclin-dependentkinase14OS=HomosapiensGN=CDK14PE=1SV=1;tr|C9IYJ9|C9IYJ9_HUMANCyclin-dependentkinase14(Fragment)OS=HomosapiensGN=CDK14PE=1SV=1;sp|O94921|CDK14_HUMANCyclin-dependentkinase14OS=HomosapiensGN=CDK14PE=1SV=3	67359000	42980000	33339000	40587000	1	1	1	6020400	1	1	0.384584	0.265918
sp|Q6PIU2|NCEH1_HUMANNeutralcholesterolesterhydrolase1OS=HomosapiensGN=NCEH1PE=1SV=3;tr|A0A0R4J2G3|A0A0R4J2G3_HUMANArylacetamidedeacetylase-like1OS=HomosapiensGN=NCEH1PE=1SV=1;tr|A0A0A0MTJ9|A0A0A0MTJ9_HUMANNeutralcholesterolesterhydrolase1OS=HomosapiensGN=NCEH1PE=1SV=1;tr|H7C046|H7C046_HUMANNeutralcholesterolesterhydrolase1(Fragment)OS=HomosapiensGN=NCEH1PE=1SV=1	20226000	35901000	1	31217000	45447000	5135500	1	1	1	1	0.726781	0.0135094
sp|Q8TCJ2|STT3B_HUMANDolichyl-diphosphooligosaccharide--proteinglycosyltransferasesubunitSTT3BOS=HomosapiensGN=STT3BPE=1SV=1	8048200	8411600	1	14981000	9308100	1701900	1	1	1	1	0.714043	0.0162528
sp|P52790|HXK3_HUMANHexokinase-3OS=HomosapiensGN=HK3PE=1SV=2;tr|H0Y8U9|H0Y8U9_HUMANPhosphotransferase(Fragment)OS=HomosapiensGN=HK3PE=1SV=1;tr|H0Y9N6|H0Y9N6_HUMANPhosphotransferase(Fragment)OS=HomosapiensGN=HK3PE=1SV=8	1	21523000	1	10138000	1	29886000	9984400	35308000	48510000	26829000	-0.596249	#NUM!
sp|P08758|ANXA5_HUMANAnnexinA5OS=HomosapiensGN=ANXA5PE=1SV=2;tr|D6RBE9|D6RBE9_HUMANAnnexinOS=HomosapiensGN=ANXA5PE=1SV=1;tr|D6RBL5|D6RBL5_HUMANAnnexinOS=HomosapiensGN=ANXA5PE=1SV=1;tr|E9PHT9|E9PHT9_HUMANAnnexinOS=HomosapiensGN=ANXA5PE=1SV=1;tr|D6RCN3|D6RCN3_HUMANAnnexinA5OS=HomosapiensGN=ANXA5PE=1SV=1	310480000	38468000	99410000	72152000	62322000	773630000	390420000	608690000	1444500000	432600000	-0.357129	#NUM!
tr|B1AKD8|B1AKD8_HUMANRootletin(Fragment)OS=HomosapiensGN=CROCCPE=1SV=2;sp|Q5TZA2|CROCC_HUMANRootletinOS=HomosapiensGN=CROCCPE=1SV=1;sp|Q86T23|CROL1_HUMANPutativeciliaryrootletcoiled-coilprotein-like1proteinOS=HomosapiensGN=CROCCP2PE=5SV=1;tr|A0A087WW81|A0A087WW81_HUMANRootletin(Fragment)OS=HomosapiensGN=CROCCPE=1SV=6	1	1	1	1524400	1	8798700	10470000	21695000	20960000	1	-0.450139	#NUM!
tr|Q53S08|Q53S08_HUMANRab6COS=HomosapiensGN=RAB6CPE=2SV=1;sp|Q9H0N0|RAB6C_HUMANRas-relatedproteinRab-6COS=HomosapiensGN=RAB6CPE=1SV=2	20302000	72083000	14086000	46371000	19544000	1	6479500	1	5213400	1	0.219494	0.538847
sp|P28066|PSA5_HUMANProteasomesubunitalphatype-5OS=HomosapiensGN=PSMA5PE=1SV=3	108040000	34121000	27233000	25030000	74645000	1	1	1	23181000	1	0.865136	0.000642968
sp|P62328|TYB4_HUMANThymosinbeta-4OS=HomosapiensGN=TMSB4XPE=1SV=2	37212000	17082000	25152000	30149000	89153000	1	1	18491000	1	1	0.821924	0.00220941
sp|P28838|AMPL_HUMANCytosolaminopeptidaseOS=HomosapiensGN=LAP3PE=1SV=3;tr|H0Y9Q1|H0Y9Q1_HUMANCytosolaminopeptidase(Fragment)OS=HomosapiensGN=LAP3PE=1SV=8;tr|H0Y983|H0Y983_HUMANCytosolaminopeptidase(Fragment)OS=HomosapiensGN=LAP3PE=1SV=1	17016000	16941000	1	34736000	1	33873000	25422000	27235000	57739000	43586000	-0.389804	#NUM!
sp|O00560|SDCB1_HUMANSyntenin-1OS=HomosapiensGN=SDCBPPE=1SV=1;tr|B4DHN5|B4DHN5_HUMANSyntenin-1OS=HomosapiensGN=SDCBPPE=1SV=1;tr|E9PBU7|E9PBU7_HUMANSyntenin-1OS=HomosapiensGN=SDCBPPE=1SV=1	69964000	200430000	6678600	125680000	175790000	19679000	8239700	8554700	3978900	49295000	0.534226	0.104156
sp|P63167|DYL1_HUMANDyneinlightchain1,cytoplasmicOS=HomosapiensGN=DYNLL1PE=1SV=1;tr|F8VXI7|F8VXI7_HUMANDyneinlightchain1,cytoplasmic(Fragment)OS=HomosapiensGN=DYNLL1PE=1SV=1;tr|F8VXL2|F8VXL2_HUMANDyneinlightchain1,cytoplasmicOS=HomosapiensGN=DYNLL1PE=1SV=1;tr|F8VRV5|F8VRV5_HUMANDyneinlightchain1,cytoplasmicOS=HomosapiensGN=DYNLL1PE=1SV=1;sp|Q96FJ2|DYL2_HUMANDyneinlightchain2,cytoplasmicOS=Homosap…	61177000	48676000	12193000	34155000	1	1	1	1	5065400	1	0.411865	0.229984
tr|J3KTJ8|J3KTJ8_HUMAN60SribosomalproteinL26(Fragment)OS=HomosapiensGN=RPL26PE=4SV=8;tr|J3QRI7|J3QRI7_HUMAN60SribosomalproteinL26(Fragment)OS=HomosapiensGN=RPL26PE=4SV=1;tr|J3QQQ9|J3QQQ9_HUMANUncharacterizedproteinOS=HomosapiensPE=4SV=1;tr|J3QQV1|J3QQV1_HUMAN60SribosomalproteinL26OS=HomosapiensGN=RPL26PE=4SV=1;tr|E5RIT6|E5RIT6_HUMAN60SribosomalproteinL26-like1(Fragment)OS=HomosapiensGN=RPL26L1PE=…	1	1	6659600	1	1	28175000	1	22570000	26669000	6510800	-0.472108	#NUM!
sp|Q96BM9|ARL8A_HUMANADP-ribosylationfactor-likeprotein8AOS=HomosapiensGN=ARL8APE=1SV=1;tr|A0A087X2J2|A0A087X2J2_HUMANADP-ribosylationfactor-likeprotein8AOS=HomosapiensGN=ARL8APE=1SV=1	1	23098000	4128000	15938000	20567000	1	3692200	1	1086200	1	0.3717	0.283862
tr|H0Y362|H0Y362_HUMANZinctransporter7(Fragment)OS=HomosapiensGN=SLC30A7PE=1SV=2;sp|Q8NEW0|ZNT7_HUMANZinctransporter7OS=HomosapiensGN=SLC30A7PE=2SV=1	30310000	17859000	53300000	20288000	1	1	1	8642000	1	1	0.0572146	0.874461
tr|F5GYN4|F5GYN4_HUMANUbiquitinthioesteraseOTUB1OS=HomosapiensGN=OTUB1PE=1SV=1;sp|Q96FW1|OTUB1_HUMANUbiquitinthioesteraseOTUB1OS=HomosapiensGN=OTUB1PE=1SV=2;tr|J3KR44|J3KR44_HUMANUbiquitinthioesteraseOS=HomosapiensGN=OTUB1PE=1SV=2;tr|F5H6Q1|F5H6Q1_HUMANUbiquitinthioesteraseOS=HomosapiensGN=OTUB1PE=1SV=1;tr|F5H3F0|F5H3F0_HUMANUbiquitinthioesteraseOTUB1OS=HomosapiensGN=OTUB1PE=1SV=1;tr|F5GYJ8|F5GYJ…	15563000	43678000	1	50982000	19701000	1	1	1	9296700	270320	0.399212	0.246299
sp|O75131|CPNE3_HUMANCopine-3OS=HomosapiensGN=CPNE3PE=1SV=1;tr|A0A087WYQ3|A0A087WYQ3_HUMANCopine-3(Fragment)OS=HomosapiensGN=CPNE3PE=1SV=1;tr|E5RFT7|E5RFT7_HUMANCopine-3(Fragment)OS=HomosapiensGN=CPNE3PE=1SV=1;tr|A0A087WUS8|A0A087WUS8_HUMANCopine-3(Fragment)OS=HomosapiensGN=CPNE3PE=1SV=1;tr|A0A087WXR6|A0A087WXR6_HUMANCopine-3(Fragment)OS=HomosapiensGN=CPNE3PE=1SV=1;tr|E5RHZ0|E5RHZ0_HUMANCopine-3(…	1	4186200	1	1	1	13272000	1	7795600	20756000	32411000	-0.445384	#NUM!
sp|Q9BW30|TPPP3_HUMANTubulinpolymerization-promotingproteinfamilymember3OS=HomosapiensGN=TPPP3PE=1SV=1	1	8732200	1	7495000	7549000	86372000	27547000	31157000	229400000	274650000	-0.383396	#NUM!
sp|Q9BV40|VAMP8_HUMANVesicle-associatedmembraneprotein8OS=HomosapiensGN=VAMP8PE=1SV=1;tr|C9JXZ5|C9JXZ5_HUMANVesicle-associatedmembraneprotein8OS=HomosapiensGN=VAMP8PE=1SV=1;tr|B8ZZT4|B8ZZT4_HUMANVesicle-associatedmembraneprotein8OS=HomosapiensGN=VAMP8PE=1SV=1	89370000	56067000	5988400	84140000	1	1	1	1	5906300	1	0.493968	0.13916
sp|P27797|CALR_HUMANCalreticulinOS=HomosapiensGN=CALRPE=1SV=1;tr|K7EJB9|K7EJB9_HUMANCalreticulin(Fragment)OS=HomosapiensGN=CALRPE=1SV=1;tr|K7EL50|K7EL50_HUMANCalreticulin(Fragment)OS=HomosapiensGN=CALRPE=1SV=1	222980000	56278000	12693000	359120000	112220000	1	1	2593300	4169300	1	0.693936	0.0213431
sp|P26641|EF1G_HUMANElongationfactor1-gammaOS=HomosapiensGN=EEF1GPE=1SV=3	1	8744600	4039400	21327000	1	39251000	19144000	1572900	60766000	47381000	-0.411164	#NUM!
sp|P49368|TCPG_HUMANT-complexprotein1subunitgammaOS=HomosapiensGN=CCT3PE=1SV=4;tr|B4DUR8|B4DUR8_HUMANT-complexprotein1subunitgammaOS=HomosapiensGN=CCT3PE=1SV=1;tr|E9PRC8|E9PRC8_HUMANT-complexprotein1subunitgamma(Fragment)OS=HomosapiensGN=CCT3PE=1SV=1;tr|E9PM09|E9PM09_HUMANT-complexprotein1subunitgamma(Fragment)OS=HomosapiensGN=CCT3PE=1SV=1;tr|Q5SZX9|Q5SZX9_HUMANT-complexprotein1subunitgamma(Fragm…	35423000	14046000	11903000	27592000	1	34149000	38225000	46764000	45073000	19351000	-0.336716	#NUM!
sp|Q01518|CAP1_HUMANAdenylylcyclase-associatedprotein1OS=HomosapiensGN=CAP1PE=1SV=5;tr|Q5T0R7|Q5T0R7_HUMANAdenylylcyclase-associatedprotein1(Fragment)OS=HomosapiensGN=CAP1PE=1SV=1;tr|Q5T0R6|Q5T0R6_HUMANAdenylylcyclase-associatedprotein1(Fragment)OS=HomosapiensGN=CAP1PE=1SV=1;tr|Q5T0R5|Q5T0R5_HUMANAdenylylcyclase-associatedprotein1(Fragment)OS=HomosapiensGN=CAP1PE=1SV=8;tr|Q5T0R4|Q5T0R4_HUMANAdeny…	12825000	52975000	28909000	133300000	1	224920000	41716000	214410000	170730000	88252000	-0.478979	#NUM!
sp|Q15365|PCBP1_HUMANPoly(rC)-bindingprotein1OS=HomosapiensGN=PCBP1PE=1SV=2	24934000	36458000	9923200	58022000	7121900	50109000	42158000	69378000	105160000	46264000	-0.432807	#NUM!
tr|H0YGX7|H0YGX7_HUMANRhoGDP-dissociationinhibitor2(Fragment)OS=HomosapiensGN=ARHGDIBPE=1SV=1;sp|P52566|GDIR2_HUMANRhoGDP-dissociationinhibitor2OS=HomosapiensGN=ARHGDIBPE=1SV=3;tr|F5H2R5|F5H2R5_HUMANRhoGDP-dissociationinhibitor2(Fragment)OS=HomosapiensGN=ARHGDIBPE=1SV=1;tr|F5H6Q0|F5H6Q0_HUMANRhoGDP-dissociationinhibitor2(Fragment)OS=HomosapiensGN=ARHGDIBPE=1SV=1;tr|F5H3P3|F5H3P3_HUMANRhoGDP-disso…	132230000	88652000	7262500	67855000	7444200	1	1	11465000	3209700	4524300	0.495359	0.137847
sp|P09525|ANXA4_HUMANAnnexinA4OS=HomosapiensGN=ANXA4PE=1SV=4	33201000	26867000	21673000	33640000	1	94005000	27558000	131980000	443170000	386440000	-0.395672	#NUM!
sp|Q9HCY8|S10AE_HUMANProteinS100-A14OS=HomosapiensGN=S100A14PE=1SV=1	9494100	7861000	1	8001300	1	1	1	1	1126800	1	0.4446	0.190632
sp|P50995|ANX11_HUMANAnnexinA11OS=HomosapiensGN=ANXA11PE=1SV=1;tr|H0Y6E1|H0Y6E1_HUMANAnnexinA11(Fragment)OS=HomosapiensGN=ANXA11PE=1SV=1;tr|E5RIN3|E5RIN3_HUMANAnnexinA13(Fragment)OS=HomosapiensGN=ANXA13PE=1SV=1;sp|P27216|ANX13_HUMANAnnexinA13OS=HomosapiensGN=ANXA13PE=1SV=3	93681000	32842000	11481000	66473000	1	123630000	32020000	259740000	87004000	227890000	-0.370206	#NUM!
sp|O00231|PSD11_HUMAN26Sproteasomenon-ATPaseregulatorysubunit11OS=HomosapiensGN=PSMD11PE=1SV=3;tr|J3QRY4|J3QRY4_HUMAN26Sproteasomenon-ATPaseregulatorysubunit11(Fragment)OS=HomosapiensGN=PSMD11PE=1SV=8;tr|J3QS13|J3QS13_HUMAN26Sproteasomenon-ATPaseregulatorysubunit11(Fragment)OS=HomosapiensGN=PSMD11PE=1SV=1	3618800	2515500	1	12707000	1	3508700	6259200	24746000	17383000	19951000	-0.408097	#NUM!
sp|Q02413|DSG1_HUMANDesmoglein-1OS=HomosapiensGN=DSG1PE=1SV=2	5480500	7059100	1	8909000	1	1	1	1	886700	1	0.343025	0.325989
sp|P61088|UBE2N_HUMANUbiquitin-conjugatingenzymeE2NOS=HomosapiensGN=UBE2NPE=1SV=1;sp|Q5JXB2|UE2NL_HUMANPutativeubiquitin-conjugatingenzymeE2N-likeOS=HomosapiensGN=UBE2NLPE=1SV=1;tr|F8VZ29|F8VZ29_HUMANUbiquitin-conjugatingenzymeE2NOS=HomosapiensGN=UBE2NPE=1SV=1;tr|F8VQQ8|F8VQQ8_HUMANUbiquitin-conjugatingenzymeE2NOS=HomosapiensGN=UBE2NPE=1SV=1;tr|F8VSD4|F8VSD4_HUMANUbiquitin-conjugatingenzymeE2NOS=…	6027500	11295000	1	17553000	1	15993000	1	33348000	49331000	39064000	-0.413788	#NUM!
sp|O14879|IFIT3_HUMANInterferon-inducedproteinwithtetratricopeptiderepeats3OS=HomosapiensGN=IFIT3PE=1SV=1	24999000	19692000	1	13588000	1	1	1	2389800	1	1	0.433643	0.203342
sp|P31949|S10AB_HUMANProteinS100-A11OS=HomosapiensGN=S100A11PE=1SV=2	1	27207000	1	1	33041000	324460000	89434000	44266000	95609000	66649000	-0.299289	#NUM!
tr|H3BRG4|H3BRG4_HUMANCytochromeb-c1complexsubunit2,mitochondrialOS=HomosapiensGN=UQCRC2PE=1SV=1;sp|P22695|QCR2_HUMANCytochromeb-c1complexsubunit2,mitochondrialOS=HomosapiensGN=UQCRC2PE=1SV=3	5511100	4336500	1	11707000	6243600	1	1	3607800	2334800	1	0.645199	0.0380517
sp|P23526|SAHH_HUMANAdenosylhomocysteinaseOS=HomosapiensGN=AHCYPE=1SV=4	14426000	6897100	1	13918000	1	22447000	31242000	24108000	13166000	4678800	-0.28183	#NUM!
sp|P07988|PSPB_HUMANPulmonarysurfactant-associatedproteinBOS=HomosapiensGN=SFTPBPE=1SV=3;tr|D6W5L6|D6W5L6_HUMANPulmonarysurfactant-associatedproteinBOS=HomosapiensGN=SFTPBPE=1SV=1;tr|H0Y7V6|H0Y7V6_HUMANPulmonarysurfactant-associatedproteinB(Fragment)OS=HomosapiensGN=SFTPBPE=1SV=1;tr|U3KQT2|U3KQT2_HUMANPulmonarysurfactant-associatedproteinB(Fragment)OS=HomosapiensGN=SFTPBPE=1SV=1	86241000	174600000	81007000	216900000	1	2239700000	466120000	811790000	711970000	4546500000	-0.389395	#NUM!
sp|O75874|IDHC_HUMANIsocitratedehydrogenase[NADP]cytoplasmicOS=HomosapiensGN=IDH1PE=1SV=2;tr|C9J4N6|C9J4N6_HUMANIsocitratedehydrogenase[NADP]cytoplasmic(Fragment)OS=HomosapiensGN=IDH1PE=1SV=1;tr|C9JJE5|C9JJE5_HUMANIsocitratedehydrogenase[NADP]cytoplasmic(Fragment)OS=HomosapiensGN=IDH1PE=1SV=1;tr|C9JLU6|C9JLU6_HUMANIsocitratedehydrogenase[NADP]cytoplasmic(Fragment)OS=HomosapiensGN=IDH1PE=1SV=8	27480000	27721000	7844000	34228000	25517000	88142000	1	49099000	110930000	92067000	-0.270711	#NUM!
tr|G3V2H3|G3V2H3_HUMANPurinenucleosidephosphorylase(Fragment)OS=HomosapiensGN=PNPPE=1SV=1;sp|P00491|PNPH_HUMANPurinenucleosidephosphorylaseOS=HomosapiensGN=PNPPE=1SV=2;tr|G3V5M2|G3V5M2_HUMANPurinenucleosidephosphorylase(Fragment)OS=HomosapiensGN=PNPPE=1SV=1	1	1	1047300	1	1	6188800	1	862960	2215400	6706800	-0.400187	#NUM!
tr|B1AVQ7|B1AVQ7_HUMANMucin-1OS=HomosapiensGN=MUC1PE=1SV=1;tr|A0A0A0MRB3|A0A0A0MRB3_HUMANMucin-1OS=HomosapiensGN=MUC1PE=1SV=1;tr|A0A0C4DGW3|A0A0C4DGW3_HUMANMucin-1OS=HomosapiensGN=MUC1PE=1SV=1;tr|A0A087X2A4|A0A087X2A4_HUMANMucin-1OS=HomosapiensGN=MUC1PE=1SV=1;sp|P15941|MUC1_HUMANMucin-1OS=HomosapiensGN=MUC1PE=1SV=3;tr|A0A087WWM1|A0A087WWM1_HUMANMucin-1OS=HomosapiensGN=MUC1PE=1SV=1;tr|A0A087WVJ0|A…	270310000	223320000	43629000	333720000	1	38675000	32739000	63474000	6720500	29949000	0.369729	0.286662
sp|P55327|TPD52_HUMANTumorproteinD52OS=HomosapiensGN=TPD52PE=1SV=2;tr|H0YC42|H0YC42_HUMANUncharacterizedproteinOS=HomosapiensPE=4SV=2	5066100	3717400	1	2626400	1	1	1	1	611310	1	0.455936	0.177975
sp|O75923|DYSF_HUMANDysferlinOS=HomosapiensGN=DYSFPE=1SV=1	16858000	4360400	1	2422000	20651000	1	1	1	1	383770	0.927194	3.71053e-05
sp|O75396|SC22B_HUMANVesicle-traffickingproteinSEC22bOS=HomosapiensGN=SEC22BPE=1SV=4	1	1	1	1372900	1	6981500	1	4249000	6584500	1	-0.320524	#NUM!
tr|J3QS39|J3QS39_HUMANPolyubiquitin-B(Fragment)OS=HomosapiensGN=UBBPE=1SV=1;tr|J3QTR3|J3QTR3_HUMANUbiquitin-40SribosomalproteinS27a(Fragment)OS=HomosapiensGN=RPS27APE=1SV=1;tr|F5H6Q2|F5H6Q2_HUMANPolyubiquitin-C(Fragment)OS=HomosapiensGN=UBCPE=1SV=8;sp|P62987|RL40_HUMANUbiquitin-60SribosomalproteinL40OS=HomosapiensGN=UBA52PE=1SV=2;tr|F5GYU3|F5GYU3_HUMANPolyubiquitin-C(Fragment)OS=HomosapiensGN=UBC…	19481000	15564000	20036000	21344000	1	293480000	92823000	81198000	19517000	81578000	-0.35343	#NUM!
tr|Q5TEC6|Q5TEC6_HUMANHistoneH3OS=HomosapiensGN=HIST2H3PS2PE=1SV=1	465360000	108300000	25914000	277910000	22830000	1	1	18645000	1	1	0.631181	0.0441296
sp|Q00610|CLH1_HUMANClathrinheavychain1OS=HomosapiensGN=CLTCPE=1SV=5;tr|A0A087WVQ6|A0A087WVQ6_HUMANClathrinheavychainOS=HomosapiensGN=CLTCPE=1SV=1;tr|J3KS13|J3KS13_HUMANClathrinheavychain1OS=HomosapiensGN=CLTCPE=1SV=1;tr|A0A087WX41|A0A087WX41_HUMANClathrinheavychain2OS=HomosapiensGN=CLTCL1PE=1SV=1;sp|P53675|CLH2_HUMANClathrinheavychain2OS=HomosapiensGN=CLTCL1PE=1SV=2;tr|K7EJJ5|K7EJJ5_HUMANClathri…	436590000	76839000	209140000	343050000	35263000	38404000	25990000	134060000	75811000	1	0.484094	0.148697
sp|P26038|MOES_HUMANMoesinOS=HomosapiensGN=MSNPE=1SV=3	1	37911000	54930000	62298000	106650000	135430000	22007000	110100000	178660000	140450000	-0.289534	#NUM!
sp|P61081|UBC12_HUMANNEDD8-conjugatingenzymeUbc12OS=HomosapiensGN=UBE2MPE=1SV=1	9364900	7424300	1	6685100	1	1	1	1852700	1092600	1	0.417595	0.222797
sp|Q92930|RAB8B_HUMANRas-relatedproteinRab-8BOS=HomosapiensGN=RAB8BPE=1SV=2;tr|H0YNE9|H0YNE9_HUMANRas-relatedproteinRab-8B(Fragment)OS=HomosapiensGN=RAB8BPE=1SV=1	4735400	3169300	1797200	3884100	7629800	2239300	1	1	3823400	2572600	0.835356	0.00156595
sp|Q5T447|HECD3_HUMANE3ubiquitin-proteinligaseHECTD3OS=HomosapiensGN=HECTD3PE=1SV=1	738140	1	1	1	1	1883100	1	1223600	283530	1098500	-0.228274	#NUM!
sp|O60635|TSN1_HUMANTetraspanin-1OS=HomosapiensGN=TSPAN1PE=1SV=2	18362000	4400400	23881000	8748100	1	1	4936900	2408500	2443600	1	0.142748	0.691921
tr|H7C5W9|H7C5W9_HUMANSarcoplasmic/endoplasmicreticulumcalciumATPase2(Fragment)OS=HomosapiensGN=ATP2A2PE=1SV=1;sp|P16615|AT2A2_HUMANSarcoplasmic/endoplasmicreticulumcalciumATPase2OS=HomosapiensGN=ATP2A2PE=1SV=1;sp|O14983|AT2A1_HUMANSarcoplasmic/endoplasmicreticulumcalciumATPase1OS=HomosapiensGN=ATP2A1PE=1SV=1	15183000	5951500	2327000	9067100	1	1	1	1	4324300	1	0.519652	0.116114
sp|P51148|RAB5C_HUMANRas-relatedproteinRab-5COS=HomosapiensGN=RAB5CPE=1SV=2;tr|K7EIP6|K7EIP6_HUMANUncharacterizedprotein(Fragment)OS=HomosapiensPE=4SV=1;tr|K7ENY4|K7ENY4_HUMANRas-relatedproteinRab-5C(Fragment)OS=HomosapiensGN=RAB5CPE=1SV=1;tr|K7ERI8|K7ERI8_HUMANUncharacterizedproteinOS=HomosapiensPE=4SV=1;tr|K7ERQ8|K7ERQ8_HUMANUncharacterizedprotein(Fragment)OS=HomosapiensPE=4SV=1	4612800	1	1892000	2292900	1	12246000	7808900	47115000	12617000	5950600	-0.389562	#NUM!
tr|A0A087WXI2|A0A087WXI2_HUMANIgGFc-bindingproteinOS=HomosapiensGN=FCGBPPE=1SV=1;sp|Q9Y6R7|FCGBP_HUMANIgGFc-bindingproteinOS=HomosapiensGN=FCGBPPE=1SV=3;tr|A0A087WUZ2|A0A087WUZ2_HUMANIgGFc-bindingproteinOS=HomosapiensGN=FCGBPPE=1SV=1	401210000	164910000	167800000	420090000	74295000	806530000	403640000	325890000	316870000	1115400000	-0.295119	#NUM!
sp|P01876|IGHA1_HUMANImmunoglobulinheavyconstantalpha1OS=HomosapiensGN=IGHA1PE=1SV=2	603080000	643770000	2111400000	886700000	2340900000	1225700000	5452400000	3045900000	3220800000	10944000000	-0.380134	#NUM!
sp|P12273|PIP_HUMANProlactin-inducibleproteinOS=HomosapiensGN=PIPPE=1SV=1	23611000	1	1	7589200	1	5038700	4170500	152820000	60550000	179940000	-0.376324	#NUM!
sp|P49411|EFTU_HUMANElongationfactorTu,mitochondrialOS=HomosapiensGN=TUFMPE=1SV=2;tr|H3BNU3|H3BNU3_HUMANElongationfactorTu,mitochondrialOS=HomosapiensGN=TUFMPE=1SV=1	12078000	18556000	4224100	39690000	1	1	1	1	4754300	1	0.27228	0.4421
sp|Q99832|TCPH_HUMANT-complexprotein1subunitetaOS=HomosapiensGN=CCT7PE=1SV=2;tr|F8WAM2|F8WAM2_HUMANT-complexprotein1subuniteta(Fragment)OS=HomosapiensGN=CCT7PE=1SV=1;tr|F8WBP8|F8WBP8_HUMANT-complexprotein1subunitetaOS=HomosapiensGN=CCT7PE=1SV=1	8467300	12961000	5490400	25422000	2738900	49791000	10660000	55786000	95985000	8377200	-0.349389	#NUM!
tr|Q5T0I0|Q5T0I0_HUMANGelsolin(Fragment)OS=HomosapiensGN=GSNPE=1SV=1	13797000	17422000	8911500	27084000	95440000	1	1	4406200	1	1	0.751604	0.00913046
sp|P10909|CLUS_HUMANClusterinOS=HomosapiensGN=CLUPE=1SV=1;tr|E7ERK6|E7ERK6_HUMANClusterin(Fragment)OS=HomosapiensGN=CLUPE=1SV=1;tr|E7ETB4|E7ETB4_HUMANClusterin(Fragment)OS=HomosapiensGN=CLUPE=1SV=1;tr|H0YLK8|H0YLK8_HUMANClusterin(Fragment)OS=HomosapiensGN=CLUPE=1SV=1;tr|E5RJZ5|E5RJZ5_HUMANClusterin(Fragment)OS=HomosapiensGN=CLUPE=1SV=1;tr|H0YC35|H0YC35_HUMANClusterin(Fragment)OS=HomosapiensGN=CLU…	474270000	128390000	417520000	178350000	1	37853000	67902000	33435000	74869000	94165000	0.237024	0.505849
tr|M0R0Y2|M0R0Y2_HUMANAlpha-solubleNSFattachmentproteinOS=HomosapiensGN=NAPAPE=1SV=1;sp|P54920|SNAA_HUMANAlpha-solubleNSFattachmentproteinOS=HomosapiensGN=NAPAPE=1SV=3;tr|M0R213|M0R213_HUMANAlpha-solubleNSFattachmentprotein(Fragment)OS=HomosapiensGN=NAPAPE=1SV=1;tr|M0R027|M0R027_HUMANAlpha-solubleNSFattachmentprotein(Fragment)OS=HomosapiensGN=NAPAPE=1SV=1;tr|M0R058|M0R058_HUMANAlpha-solubleNSFatt…	3247300	5468400	4234300	8630600	1	1	1	1	4780700	1	0.108654	0.763552
sp|P31939|PUR9_HUMANBifunctionalpurinebiosynthesisproteinPURHOS=HomosapiensGN=ATICPE=1SV=3;tr|H7C1S2|H7C1S2_HUMANBifunctionalpurinebiosynthesisproteinPURH(Fragment)OS=HomosapiensGN=ATICPE=1SV=1;tr|C9JLK0|C9JLK0_HUMANBifunctionalpurinebiosynthesisproteinPURH(Fragment)OS=HomosapiensGN=ATICPE=1SV=1	1055400	1	1	1	1	10726000	1	13038000	27700000	1	-0.30887	#NUM!
sp|Q9HC84|MUC5B_HUMANMucin-5BOS=HomosapiensGN=MUC5BPE=1SV=3	4336100000	2979100000	38945000	1445900000	503260000	63451000	374300000	384610000	164200000	462610000	0.491805	0.141217
sp|Q8TE73|DYH5_HUMANDyneinheavychain5,axonemalOS=HomosapiensGN=DNAH5PE=1SV=3	55122000	19795000	1	58740000	1	1	7678200	1	1	1	0.540219	0.0994704
sp|Q9H1X1|RSPH9_HUMANRadialspokeheadprotein9homologOS=HomosapiensGN=RSPH9PE=1SV=1	6812800	10226000	1	7434500	1	1	1	1	3300800	1	0.259927	0.464023
sp|Q9HB40|RISC_HUMANRetinoid-inducibleserinecarboxypeptidaseOS=HomosapiensGN=SCPEP1PE=1SV=1;tr|I3L4Z9|I3L4Z9_HUMANRetinoid-inducibleserinecarboxypeptidase(Fragment)OS=HomosapiensGN=SCPEP1PE=1SV=1	5693500	4830400	1	4288700	1	1	1	1	2165200	1	0.405825	0.237696
sp|Q16777|H2A2C_HUMANHistoneH2Atype2-COS=HomosapiensGN=HIST2H2ACPE=1SV=4;sp|Q6FI13|H2A2A_HUMANHistoneH2Atype2-AOS=HomosapiensGN=HIST2H2AA3PE=1SV=3	131990000	54029000	42918000	96910000	1	416640000	210010000	773340000	54418000	131860000	-0.375204	#NUM!
tr|M0R0F0|M0R0F0_HUMAN40SribosomalproteinS5(Fragment)OS=HomosapiensGN=RPS5PE=1SV=1;sp|P46782|RS5_HUMAN40SribosomalproteinS5OS=HomosapiensGN=RPS5PE=1SV=4;tr|M0R0R2|M0R0R2_HUMAN40SribosomalproteinS5OS=HomosapiensGN=RPS5PE=1SV=1;tr|M0QZN2|M0QZN2_HUMAN40SribosomalproteinS5OS=HomosapiensGN=RPS5PE=1SV=1	1	1	1	6624100	1	9415300	1	18420000	6638400	4336500	-0.367088	#NUM!
sp|P25789|PSA4_HUMANProteasomesubunitalphatype-4OS=HomosapiensGN=PSMA4PE=1SV=1;tr|H0YLS6|H0YLS6_HUMANProteasomesubunitalphatypeOS=HomosapiensGN=PSMA4PE=1SV=1;tr|H0YLC2|H0YLC2_HUMANProteasomesubunitalphatypeOS=HomosapiensGN=PSMA4PE=1SV=1;tr|H0YMI6|H0YMI6_HUMANProteasomesubunitalphatype(Fragment)OS=HomosapiensGN=PSMA4PE=1SV=1;tr|H0YMA1|H0YMA1_HUMANProteasomesubunitalphatype(Fragment)OS=HomosapiensG…	19140000	10410000	2610600	15458000	11917000	16713000	1	1	1643300	1	0.697718	0.0203111
sp|P62826|RAN_HUMANGTP-bindingnuclearproteinRanOS=HomosapiensGN=RANPE=1SV=3;tr|B5MDF5|B5MDF5_HUMANGTP-bindingnuclearproteinRanOS=HomosapiensGN=RANPE=1SV=1;tr|J3KQE5|J3KQE5_HUMANGTP-bindingnuclearproteinRan(Fragment)OS=HomosapiensGN=RANPE=1SV=1;tr|H0YFC6|H0YFC6_HUMANGTP-bindingnuclearproteinRan(Fragment)OS=HomosapiensGN=RANPE=1SV=1;tr|F5H018|F5H018_HUMANGTP-bindingnuclearproteinRan(Fragment)OS=Hom…	30702000	79918000	1	70520000	96121000	148230000	110020000	66788000	79365000	89747000	-0.112595	#NUM!
sp|P60981|DEST_HUMANDestrinOS=HomosapiensGN=DSTNPE=1SV=3;tr|F6RFD5|F6RFD5_HUMANDestrinOS=HomosapiensGN=DSTNPE=1SV=1	21021000	18100000	5707400	16031000	1055600	71915000	65460000	16574000	200270000	24851000	-0.291593	#NUM!
sp|P61626|LYSC_HUMANLysozymeCOS=HomosapiensGN=LYZPE=1SV=1;tr|F8VV32|F8VV32_HUMANLysozymeCOS=HomosapiensGN=LYZPE=1SV=1;tr|A0A0B4J259|A0A0B4J259_HUMANLysozymeCOS=HomosapiensGN=LYZPE=1SV=1	1	1	1	1	2519900	35735000	361370000	168110000	53846000	4364200	-0.363181	#NUM!
tr|B4DDN1|B4DDN1_HUMANGlutamine--tRNAligaseOS=HomosapiensGN=QARSPE=1SV=1;tr|A0A1B0GVU9|A0A1B0GVU9_HUMANGlutamine--tRNAligase(Fragment)OS=HomosapiensGN=QARSPE=1SV=1;sp|P47897|SYQ_HUMANGlutamine--tRNAligaseOS=HomosapiensGN=QARSPE=1SV=1;tr|A0A1B0GTT3|A0A1B0GTT3_HUMANGlutamine--tRNAligase(Fragment)OS=HomosapiensGN=QARSPE=1SV=1;tr|A0A0U1RQQ5|A0A0U1RQQ5_HUMANGlutamine--tRNAligase(Fragment)OS=Homosapien…	1	1	1	3550200	1	6112300	1	13645000	10627000	1	-0.345827	#NUM!
sp|Q9NY33|DPP3_HUMANDipeptidylpeptidase3OS=HomosapiensGN=DPP3PE=1SV=2;tr|E9PQ14|E9PQ14_HUMANDipeptidylpeptidase3(Fragment)OS=HomosapiensGN=DPP3PE=1SV=1;tr|G3V1D3|G3V1D3_HUMANDipeptidylpeptidase3OS=HomosapiensGN=DPP3PE=1SV=1;tr|G3V180|G3V180_HUMANDipeptidylpeptidase3OS=HomosapiensGN=DPP3PE=1SV=1;tr|E9PKK8|E9PKK8_HUMANDipeptidylpeptidase3(Fragment)OS=HomosapiensGN=DPP3PE=1SV=1;tr|E9PPK9|E9PPK9_HUMA…	1	1	1	12309000	1	13560000	1	6054700	12321000	15903000	-0.299182	#NUM!
sp|P78371|TCPB_HUMANT-complexprotein1subunitbetaOS=HomosapiensGN=CCT2PE=1SV=4;tr|F5GWF6|F5GWF6_HUMANT-complexprotein1subunitbetaOS=HomosapiensGN=CCT2PE=1SV=2;tr|F8VQ14|F8VQ14_HUMANT-complexprotein1subunitbetaOS=HomosapiensGN=CCT2PE=1SV=1	14302000	21797000	16965000	35135000	1	30247000	62835000	26559000	30472000	23461000	-0.519708	#NUM!
tr|H0YK13|H0YK13_HUMANGMPreductase2(Fragment)OS=HomosapiensGN=GMPR2PE=1SV=1;tr|H0YMB3|H0YMB3_HUMANGMPreductaseOS=HomosapiensGN=GMPR2PE=1SV=1;tr|H0YLV5|H0YLV5_HUMANGMPreductaseOS=HomosapiensGN=GMPR2PE=1SV=1;tr|A0A087WWM4|A0A087WWM4_HUMANGMPreductaseOS=HomosapiensGN=GMPR2PE=1SV=1;sp|Q9P2T1|GMPR2_HUMANGMPreductase2OS=HomosapiensGN=GMPR2PE=1SV=1;tr|F8WAN9|F8WAN9_HUMANGMPreductaseOS=HomosapiensGN=GMPR…	58748000	53240000	1	45585000	1	12083000	1	8127400	12752000	1	0.378157	0.274792
sp|P69905|HBA_HUMANHemoglobinsubunitalphaOS=HomosapiensGN=HBA1PE=1SV=2	269190000	142050000	681540000	1765100000	350800000	29150000	55900000	12961000	273220000	53185000	0.310913	0.376623
sp|A8MYP8|ODF3B_HUMANOuterdensefiberprotein3BOS=HomosapiensGN=ODF3BPE=2SV=1;tr|B5MCN9|B5MCN9_HUMANOuterdensefiberprotein3BOS=HomosapiensGN=ODF3BPE=1SV=1;tr|C9JUR5|C9JUR5_HUMANOuterdensefiberprotein3B(Fragment)OS=HomosapiensGN=ODF3BPE=1SV=1;tr|B5MC17|B5MC17_HUMANOuterdensefiberprotein3BOS=HomosapiensGN=ODF3BPE=1SV=1;tr|B5MD02|B5MD02_HUMANOuterdensefiberprotein3BOS=HomosapiensGN=ODF3BPE=1SV=1	188710000	1	32009000	141470000	1	1	1	1	1564200	1	0.603446	0.0579911
sp|Q96QR1|SG3A1_HUMANSecretoglobinfamily3Amember1OS=HomosapiensGN=SCGB3A1PE=1SV=2	1	104300000	5094500	35136000	1	358260000	990980000	23819000	95106000	267880000	-0.361773	#NUM!
sp|P84077|ARF1_HUMANADP-ribosylationfactor1OS=HomosapiensGN=ARF1PE=1SV=2;sp|P61204|ARF3_HUMANADP-ribosylationfactor3OS=HomosapiensGN=ARF3PE=1SV=2;tr|F5H423|F5H423_HUMANUncharacterizedproteinOS=HomosapiensPE=3SV=1;tr|H0YGG7|H0YGG7_HUMANUncharacterizedprotein(Fragment)OS=HomosapiensPE=4SV=1	56966000	38497000	9128700	37593000	21413000	23161000	15065000	29079000	6980900	1	0.554061	0.089159
sp|P14550|AK1A1_HUMANAlcoholdehydrogenase[NADP(+)]OS=HomosapiensGN=AKR1A1PE=1SV=3;tr|Q5T621|Q5T621_HUMANAlcoholdehydrogenase[NADP(+)](Fragment)OS=HomosapiensGN=AKR1A1PE=1SV=1;tr|V9GYG2|V9GYG2_HUMANAlcoholdehydrogenase[NADP(+)]OS=HomosapiensGN=AKR1A1PE=1SV=1;tr|V9GYP9|V9GYP9_HUMANAlcoholdehydrogenase[NADP(+)](Fragment)OS=HomosapiensGN=AKR1A1PE=1SV=1	5515800	1	1	72995000	1	86765000	48226000	8305500	83099000	246030000	-0.310608	#NUM!
sp|P46940|IQGA1_HUMANRasGTPase-activating-likeproteinIQGAP1OS=HomosapiensGN=IQGAP1PE=1SV=1;tr|A0A0J9YXZ5|A0A0J9YXZ5_HUMANRasGTPase-activating-likeproteinIQGAP1OS=HomosapiensGN=IQGAP1PE=1SV=1;tr|H0YLE8|H0YLE8_HUMANRasGTPase-activating-likeproteinIQGAP1OS=HomosapiensGN=IQGAP1PE=1SV=1;tr|A0A087X225|A0A087X225_HUMANRasGTPase-activating-likeproteinIQGAP1(Fragment)OS=HomosapiensGN=IQGAP1PE=1SV=1;tr|H0Y…	645200000	194040000	33839000	340080000	17363000	68991000	4139700	9453900	58913000	19697000	0.591947	0.064486
sp|P16402|H13_HUMANHistoneH1.3OS=HomosapiensGN=HIST1H1DPE=1SV=2	18955000	4702600	1	3271300	1	127060000	1	11151000	92549000	25521000	-0.22353	#NUM!
sp|P07237|PDIA1_HUMANProteindisulfide-isomeraseOS=HomosapiensGN=P4HBPE=1SV=3;tr|H7BZ94|H7BZ94_HUMANProteindisulfide-isomeraseOS=HomosapiensGN=P4HBPE=1SV=2;tr|H0Y3Z3|H0Y3Z3_HUMANProteindisulfide-isomerase(Fragment)OS=HomosapiensGN=P4HBPE=1SV=1;tr|I3L0S0|I3L0S0_HUMANProteindisulfide-isomerase(Fragment)OS=HomosapiensGN=P4HBPE=1SV=1;tr|I3L398|I3L398_HUMANProteindisulfide-isomerase(Fragment)OS=Homosap…	148280000	56845000	6296000	41507000	114960000	20385000	1	71756000	13046000	1	0.813363	0.00271061
sp|P01834|IGKC_HUMANImmunoglobulinkappaconstantOS=HomosapiensGN=IGKCPE=1SV=2	472730000	340060000	1860100000	430980000	100260000	447410000	1790900000	1158700000	2031900000	4301800000	-0.538071	#NUM!
sp|P60174|TPIS_HUMANTriosephosphateisomeraseOS=HomosapiensGN=TPI1PE=1SV=3;tr|U3KPZ0|U3KPZ0_HUMANTriosephosphateisomerase(Fragment)OS=HomosapiensGN=TPI1PE=1SV=1;tr|U3KQF3|U3KQF3_HUMANTriosephosphateisomerase(Fragment)OS=HomosapiensGN=TPI1PE=1SV=1;tr|U3KPS5|U3KPS5_HUMANTriosephosphateisomerase(Fragment)OS=HomosapiensGN=TPI1PE=1SV=8	88493000	5438500	1	32099000	1	118360000	21300000	124250000	91745000	23595000	-0.123238	#NUM!
sp|P61981|1433G_HUMAN14-3-3proteingammaOS=HomosapiensGN=YWHAGPE=1SV=2	27679000	6130700	4478900	25761000	1	64323000	25350000	11172000	36648000	22929000	-0.153643	#NUM!
sp|O00182|LEG9_HUMANGalectin-9OS=HomosapiensGN=LGALS9PE=1SV=2;tr|J3QS92|J3QS92_HUMANGalectin(Fragment)OS=HomosapiensGN=LGALS9PE=1SV=1;tr|J3KSY2|J3KSY2_HUMANGalectinOS=HomosapiensGN=LGALS9CPE=4SV=1;sp|Q6DKI2|LEG9C_HUMANGalectin-9COS=HomosapiensGN=LGALS9CPE=1SV=2;sp|Q3B8N2|LEG9B_HUMANGalectin-9BOS=HomosapiensGN=LGALS9BPE=1SV=3	7858800	11851000	1	23459000	1	1	1	1	3701800	1	0.29386	0.404933
sp|P01911|2B1F_HUMANHLAclassIIhistocompatibilityantigen,DRB1-15betachainOS=HomosapiensGN=HLA-DRB1PE=1SV=2;sp|Q5Y7A7|2B1D_HUMANHLAclassIIhistocompatibilityantigen,DRB1-13betachainOS=HomosapiensGN=HLA-DRB1PE=1SV=1;sp|Q30167|2B1A_HUMANHLAclassIIhistocompatibilityantigen,DRB1-10betachainOS=HomosapiensGN=HLA-DRB1PE=1SV=2;sp|P01912|2B13_HUMANHLAclassIIhistocompatibilityantigen,DRB1-3chainOS=Homosapiens…	27374000	36263000	1474600	91080000	1	1	662130	1	7288400	1	0.310308	0.37761
sp|P40939|ECHA_HUMANTrifunctionalenzymesubunitalpha,mitochondrialOS=HomosapiensGN=HADHAPE=1SV=2;tr|H0YFD6|H0YFD6_HUMANTrifunctionalenzymesubunitalpha,mitochondrial(Fragment)OS=HomosapiensGN=HADHAPE=1SV=1	12133000	14945000	1	38606000	22403000	1	1	14971000	9862800	1	0.554945	0.0885245
sp|P00390|GSHR_HUMANGlutathionereductase,mitochondrialOS=HomosapiensGN=GSRPE=1SV=2;tr|H0YC68|H0YC68_HUMANGlutathionereductase,mitochondrial(Fragment)OS=HomosapiensGN=GSRPE=1SV=1;tr|E5RI06|E5RI06_HUMANGlutathionereductase,mitochondrial(Fragment)OS=HomosapiensGN=GSRPE=1SV=8	1	12989000	1	9219500	1	10491000	11057000	5200700	30999000	11095000	-0.44612	#NUM!
sp|P56856|CLD18_HUMANClaudin-18OS=HomosapiensGN=CLDN18PE=2SV=1;tr|F8WEY4|F8WEY4_HUMANClaudinOS=HomosapiensGN=CLDN18PE=3SV=1	1	1	1	1	2291300	19272000	1	2289900	3322000	8189200	-0.225095	#NUM!
sp|P80188|NGAL_HUMANNeutrophilgelatinase-associatedlipocalinOS=HomosapiensGN=LCN2PE=1SV=2;tr|X6R8F3|X6R8F3_HUMANNeutrophilgelatinase-associatedlipocalinOS=HomosapiensGN=LCN2PE=1SV=1	145900000	363650000	21452000	197670000	1	9450800	15656000	73248000	16776000	20329000	0.0701338	0.846359
sp|O00299|CLIC1_HUMANChlorideintracellularchannelprotein1OS=HomosapiensGN=CLIC1PE=1SV=4	194960000	230580000	1	102640000	66041000	207420000	158410000	277110000	138660000	511110000	-0.327205	#NUM!
sp|Q9UHG3|PCYOX_HUMANPrenylcysteineoxidase1OS=HomosapiensGN=PCYOX1PE=1SV=3;tr|C9JGT6|C9JGT6_HUMANPrenylcysteineoxidase1(Fragment)OS=HomosapiensGN=PCYOX1PE=1SV=8;tr|C9JM55|C9JM55_HUMANPrenylcysteineoxidase1(Fragment)OS=HomosapiensGN=PCYOX1PE=1SV=1;tr|C9K055|C9K055_HUMANPrenylcysteineoxidase1(Fragment)OS=HomosapiensGN=PCYOX1PE=1SV=1;tr|F8W8W4|F8W8W4_HUMANPrenylcysteineoxidase1OS=HomosapiensGN=PCYOX…	4025800	4465400	1	10824000	1	1	1	1701900	1	1	0.318519	0.364309
sp|P08670|VIME_HUMANVimentinOS=HomosapiensGN=VIMPE=1SV=4;tr|B0YJC4|B0YJC4_HUMANVimentinOS=HomosapiensGN=VIMPE=1SV=1;tr|B0YJC5|B0YJC5_HUMANVimentinOS=HomosapiensGN=VIMPE=1SV=1;tr|A0A1B0GTT5|A0A1B0GTT5_HUMANVimentin(Fragment)OS=HomosapiensGN=VIMPE=1SV=1;sp|P17661|DESM_HUMANDesminOS=HomosapiensGN=DESPE=1SV=3;tr|A0A1B0GVG8|A0A1B0GVG8_HUMANVimentin(Fragment)OS=HomosapiensGN=VIMPE=1SV=1;tr|H7C5W5|H7C5W…	1027600000	762400000	1033500000	1508900000	165170000	515880000	154500000	95358000	944140000	452940000	0.177462	0.621095
sp|P27824|CALX_HUMANCalnexinOS=HomosapiensGN=CANXPE=1SV=2;tr|H0Y9Q7|H0Y9Q7_HUMANCalnexin(Fragment)OS=HomosapiensGN=CANXPE=1SV=1;tr|D6RAU8|D6RAU8_HUMANCalnexin(Fragment)OS=HomosapiensGN=CANXPE=1SV=1;tr|D6RB85|D6RB85_HUMANCalnexin(Fragment)OS=HomosapiensGN=CANXPE=1SV=1;tr|D6RDP7|D6RDP7_HUMANCalnexin(Fragment)OS=HomosapiensGN=CANXPE=1SV=1;tr|D6RGY2|D6RGY2_HUMANCalnexin(Fragment)OS=HomosapiensGN=CANX…	19341000	71584000	9666500	148350000	245540000	1	1	76274000	10601000	1	0.643098	0.0389245
tr|G3V1N2|G3V1N2_HUMANHCG1745306,isoformCRA_aOS=HomosapiensGN=HBA2PE=1SV=1	13980000	4917600	207560000	159180000	8239900	10491000	1	1485200	1229700	1642900	-0.016574	#NUM!
sp|P47755|CAZA2_HUMANF-actin-cappingproteinsubunitalpha-2OS=HomosapiensGN=CAPZA2PE=1SV=3;tr|C9JUG7|C9JUG7_HUMANF-actin-cappingproteinsubunitalpha-2OS=HomosapiensGN=CAPZA2PE=1SV=1;tr|F8W9N7|F8W9N7_HUMANF-actin-cappingproteinsubunitalpha-2OS=HomosapiensGN=CAPZA2PE=1SV=1;tr|A0A0D9SET8|A0A0D9SET8_HUMANF-actin-cappingproteinsubunitalpha-2OS=HomosapiensGN=CAPZA2PE=1SV=1;tr|F8WED3|F8WED3_HUMANF-actin-ca…	10936000	9367400	1	14554000	1	11129000	12431000	20037000	6553100	18314000	-0.332611	#NUM!
sp|P60842|IF4A1_HUMANEukaryoticinitiationfactor4A-IOS=HomosapiensGN=EIF4A1PE=1SV=1;tr|J3KTB5|J3KTB5_HUMANEukaryoticinitiationfactor4A-I(Fragment)OS=HomosapiensGN=EIF4A1PE=1SV=1;tr|J3KT12|J3KT12_HUMANEukaryoticinitiationfactor4A-IOS=HomosapiensGN=EIF4A1PE=1SV=1;tr|J3QS69|J3QS69_HUMANEukaryoticinitiationfactor4A-I(Fragment)OS=HomosapiensGN=EIF4A1PE=1SV=1;tr|J3QKZ9|J3QKZ9_HUMANEukaryoticinitiationfa…	30308000	36404000	9523900	53675000	3628000	76553000	1913300	147000000	73365000	50319000	-0.379481	#NUM!
sp|P30273|FCERG_HUMANHighaffinityimmunoglobulinepsilonreceptorsubunitgammaOS=HomosapiensGN=FCER1GPE=1SV=1	34143000	39735000	5534400	28273000	1	732790000	1	111620000	695570000	1	-0.250827	#NUM!
sp|P62269|RS18_HUMAN40SribosomalproteinS18OS=HomosapiensGN=RPS18PE=1SV=3;tr|A0A0G2JQH2|A0A0G2JQH2_HUMAN40SribosomalproteinS18OS=HomosapiensGN=RPS18PE=1SV=1;tr|Q5GGW2|Q5GGW2_HUMAN40SribosomalproteinS18OS=HomosapiensGN=RPS18PE=1SV=1	27622000	12863000	23043000	26529000	8245000	1	1	11092000	28846000	1	0.304837	0.3866
sp|B9A064|IGLL5_HUMANImmunoglobulinlambda-likepolypeptide5OS=HomosapiensGN=IGLL5PE=2SV=2;tr|A0A0B4J231|A0A0B4J231_HUMANImmunoglobulinlambda-likepolypeptide5OS=HomosapiensGN=IGLL5PE=1SV=1;sp|P0CG04|IGLC1_HUMANImmunoglobulinlambdaconstant1OS=HomosapiensGN=IGLC1PE=1SV=1	25015000	11792000	22784000	13679000	10058000	26451000	54128000	16633000	52540000	171930000	-0.335972	#NUM!
sp|P07814|SYEP_HUMANBifunctionalglutamate/proline--tRNAligaseOS=HomosapiensGN=EPRSPE=1SV=5;tr|V9GYZ6|V9GYZ6_HUMANBifunctionalglutamate/proline--tRNAligase(Fragment)OS=HomosapiensGN=EPRSPE=1SV=1;tr|A0A0U1RR66|A0A0U1RR66_HUMANGlutamine--tRNAligase(Fragment)OS=HomosapiensGN=QARSPE=1SV=1;tr|A0A0U1RQT0|A0A0U1RQT0_HUMANGlutamine--tRNAligase(Fragment)OS=HomosapiensGN=QARSPE=1SV=1	10201000	2847900	894350	6707900	1	18123000	1	85886000	62014000	1803000	-0.319447	#NUM!
sp|O95786|DDX58_HUMANProbableATP-dependentRNAhelicaseDDX58OS=HomosapiensGN=DDX58PE=1SV=2;tr|A2A376|A2A376_HUMANProbableATP-dependentRNAhelicaseDDX58OS=HomosapiensGN=DDX58PE=1SV=1	1	1	1	2422100	1	7495400	1	10267000	2642900	1	-0.32534	#NUM!
sp|P19367|HXK1_HUMANHexokinase-1OS=HomosapiensGN=HK1PE=1SV=3;tr|B1AR63|B1AR63_HUMANPhosphotransferase(Fragment)OS=HomosapiensGN=HK1PE=1SV=8;tr|B1AR62|B1AR62_HUMANPhosphotransferase(Fragment)OS=HomosapiensGN=HK1PE=1SV=1;tr|B1AR61|B1AR61_HUMANPhosphotransferase(Fragment)OS=HomosapiensGN=HK1PE=1SV=1	1	1	8389800	10194000	1	34356000	1	1	34681000	17768000	-0.324108	#NUM!
sp|P80723|BASP1_HUMANBrainacidsolubleprotein1OS=HomosapiensGN=BASP1PE=1SV=2;tr|U3KQP0|U3KQP0_HUMANBrainacidsolubleprotein1(Fragment)OS=HomosapiensGN=BASP1PE=1SV=8	389100000	300470000	1416200	215530000	44735000	34626000	1	202780000	6034400	1595700	0.400427	0.244706
sp|Q6IA69|NADE_HUMANGlutamine-dependentNAD(+)synthetaseOS=HomosapiensGN=NADSYN1PE=1SV=3;tr|E9PNF5|E9PNF5_HUMANGlutamine-dependentNAD(+)synthetase(Fragment)OS=HomosapiensGN=NADSYN1PE=1SV=1;tr|A0A0B4J216|A0A0B4J216_HUMANGlutamine-dependentNAD(+)synthetaseOS=HomosapiensGN=NADSYN1PE=1SV=1;tr|H0YCQ6|H0YCQ6_HUMANGlutamine-dependentNAD(+)synthetase(Fragment)OS=HomosapiensGN=NADSYN1PE=1SV=1;tr|E9PKY6|E9P…	92693000	32803000	1	24400000	1	1	1	5121000	1264100	1	0.545813	0.0952173
sp|P25705|ATPA_HUMANATPsynthasesubunitalpha,mitochondrialOS=HomosapiensGN=ATP5A1PE=1SV=1;tr|K7EK77|K7EK77_HUMANATPsynthasesubunitalpha,mitochondrial(Fragment)OS=HomosapiensGN=ATP5A1PE=1SV=1;tr|K7ENJ4|K7ENJ4_HUMANATPsynthasesubunitalpha,mitochondrial(Fragment)OS=HomosapiensGN=ATP5A1PE=1SV=1;tr|K7ERX7|K7ERX7_HUMANATPsynthasesubunitalpha,mitochondrial(Fragment)OS=HomosapiensGN=ATP5A1PE=1SV=1;tr|K7EQ…	16447000	23049000	7416800	35012000	1	1	15756000	1	8299900	1	0.185615	0.604819
sp|O75947|ATP5H_HUMANATPsynthasesubunitd,mitochondrialOS=HomosapiensGN=ATP5HPE=1SV=3;tr|F5H608|F5H608_HUMANATPsynthasesubunitd,mitochondrialOS=HomosapiensGN=ATP5HPE=1SV=2	4296300	1	1	14799000	7557700	1	3133900	1	1	1	0.655988	0.0337775
tr|E9PN95|E9PN95_HUMANUteroglobinOS=HomosapiensGN=SCGB1A1PE=1SV=1;sp|P11684|UTER_HUMANUteroglobinOS=HomosapiensGN=SCGB1A1PE=1SV=1	243990000	669760000	133370000	278840000	64617000	46702000	54954000	3643500	162400000	198580000	0.00131547	0.997104
sp|Q96CX2|KCD12_HUMANBTB/POZdomain-containingproteinKCTD12OS=HomosapiensGN=KCTD12PE=1SV=1	10210000	8112400	1	8905000	1	9702300	52766000	2284000	10845000	29067000	-0.29267	#NUM!
tr|A0A0J9YY99|A0A0J9YY99_HUMANUncharacterizedprotein(Fragment)OS=HomosapiensPE=1SV=1;sp|P0DP03|HV335_HUMANImmunoglobulinheavyvariable3-30-5OS=HomosapiensGN=IGHV3-30-5PE=3SV=1;sp|P01768|HV330_HUMANImmunoglobulinheavyvariable3-30OS=HomosapiensGN=IGHV3-30PE=1SV=2;sp|P01764|HV323_HUMANImmunoglobulinheavyvariable3-23OS=HomosapiensGN=IGHV3-23PE=1SV=2	1	1	15620000	4842600	1	1	10483000	192390000	327150000	22072000	-0.331513	#NUM!
sp|P62195|PRS8_HUMAN26Sproteasomeregulatorysubunit8OS=HomosapiensGN=PSMC5PE=1SV=1;tr|J3QQM1|J3QQM1_HUMAN26Sproteasomeregulatorysubunit8(Fragment)OS=HomosapiensGN=PSMC5PE=1SV=1;tr|J3QLH6|J3QLH6_HUMAN26Sproteasomeregulatorysubunit8(Fragment)OS=HomosapiensGN=PSMC5PE=1SV=1;tr|J3KRP2|J3KRP2_HUMAN26Sproteasomeregulatorysubunit8(Fragment)OS=HomosapiensGN=PSMC5PE=1SV=1;tr|J3QSA9|J3QSA9_HUMAN26Sproteasome…	5933200	3850000	1	4684400	1	24317000	1	60151000	12504000	5635000	-0.337446	#NUM!
tr|H0YEN5|H0YEN5_HUMAN40SribosomalproteinS2(Fragment)OS=HomosapiensGN=RPS2PE=1SV=1;sp|P15880|RS2_HUMAN40SribosomalproteinS2OS=HomosapiensGN=RPS2PE=1SV=2;tr|I3L404|I3L404_HUMAN40SribosomalproteinS2(Fragment)OS=HomosapiensGN=RPS2PE=1SV=1;tr|E9PM36|E9PM36_HUMAN40SribosomalproteinS2OS=HomosapiensGN=RPS2PE=1SV=1;tr|E9PMM9|E9PMM9_HUMAN40SribosomalproteinS2(Fragment)OS=HomosapiensGN=RPS2PE=1SV=1;tr|E9PQ…	1	8687000	5735100	1	1	19661000	1	123400000	27933000	21025000	-0.418112	#NUM!
sp|P05107|ITB2_HUMANIntegrinbeta-2OS=HomosapiensGN=ITGB2PE=1SV=2;tr|J3KNI6|J3KNI6_HUMANIntegrinbeta(Fragment)OS=HomosapiensGN=ITGB2PE=1SV=1;tr|E7EVZ9|E7EVZ9_HUMANIntegrinbeta(Fragment)OS=HomosapiensGN=ITGB2PE=1SV=1;tr|E5RHT0|E5RHT0_HUMANIntegrinbeta-2(Fragment)OS=HomosapiensGN=ITGB2PE=1SV=1;tr|E5RFI0|E5RFI0_HUMANIntegrinbeta-2(Fragment)OS=HomosapiensGN=ITGB2PE=1SV=1;tr|E5RIE4|E5RIE4_HUMANIntegrin…	1	25255000	7919200	1	33229000	1	1	9244800	1	1	0.323042	0.35708
sp|P31942|HNRH3_HUMANHeterogeneousnuclearribonucleoproteinH3OS=HomosapiensGN=HNRNPH3PE=1SV=2	5306200	1	1	1	1	9560000	1	14332000	5435500	1	-0.199614	#NUM!
sp|Q9NTJ5|SAC1_HUMANPhosphatidylinositidephosphataseSAC1OS=HomosapiensGN=SACM1LPE=1SV=2;tr|F8WCQ2|F8WCQ2_HUMANPhosphatidylinositidephosphataseSAC1OS=HomosapiensGN=SACM1LPE=1SV=1;tr|C9JV50|C9JV50_HUMANPhosphatidylinositidephosphataseSAC1(Fragment)OS=HomosapiensGN=SACM1LPE=1SV=1;tr|E9PGZ4|E9PGZ4_HUMANPhosphatidylinositidephosphataseSAC1OS=HomosapiensGN=SACM1LPE=1SV=1	3458400	1	1	3766400	5244100	1	1	2087300	1176600	1	0.881146	0.00036241
sp|O95336|6PGL_HUMAN6-phosphogluconolactonaseOS=HomosapiensGN=PGLSPE=1SV=2;tr|M0R261|M0R261_HUMAN6-phosphogluconolactonase(Fragment)OS=HomosapiensGN=PGLSPE=1SV=1;tr|M0R0U3|M0R0U3_HUMAN6-phosphogluconolactonaseOS=HomosapiensGN=PGLSPE=1SV=1;tr|M0R1L2|M0R1L2_HUMAN6-phosphogluconolactonase(Fragment)OS=HomosapiensGN=PGLSPE=1SV=1	9595200	15034000	1	23335000	1	13576000	15157000	6440500	39417000	54035000	-0.322568	#NUM!
sp|P05090|APOD_HUMANApolipoproteinDOS=HomosapiensGN=APODPE=1SV=1;tr|C9JF17|C9JF17_HUMANApolipoproteinD(Fragment)OS=HomosapiensGN=APODPE=1SV=1;tr|C9JX71|C9JX71_HUMANApolipoproteinD(Fragment)OS=HomosapiensGN=APODPE=1SV=1;tr|F8WBT9|F8WBT9_HUMANApolipoproteinDOS=HomosapiensGN=APODPE=1SV=1	26916000	84951000	19774000	43824000	1	5966000	1	13807000	16575000	21282000	-0.0865929	#NUM!
tr|H3BR35|H3BR35_HUMANEukaryoticpeptidechainreleasefactorGTP-bindingsubunitERF3A(Fragment)OS=HomosapiensGN=GSPT1PE=1SV=1;sp|P15170|ERF3A_HUMANEukaryoticpeptidechainreleasefactorGTP-bindingsubunitERF3AOS=HomosapiensGN=GSPT1PE=1SV=1;sp|Q8IYD1|ERF3B_HUMANEukaryoticpeptidechainreleasefactorGTP-bindingsubunitERF3BOS=HomosapiensGN=GSPT2PE=1SV=2	4755800	1	1	1	1	12410000	1	1	12144000	3511600	-0.116148	#NUM!
sp|Q16851|UGPA_HUMANUTP--glucose-1-phosphateuridylyltransferaseOS=HomosapiensGN=UGP2PE=1SV=5;tr|A0A087WYS1|A0A087WYS1_HUMANUTP--glucose-1-phosphateuridylyltransferaseOS=HomosapiensGN=UGP2PE=1SV=1;tr|E7EUC7|E7EUC7_HUMANUTP--glucose-1-phosphateuridylyltransferaseOS=HomosapiensGN=UGP2PE=1SV=1;tr|C9JQU9|C9JQU9_HUMANUTP--glucose-1-phosphateuridylyltransferase(Fragment)OS=HomosapiensGN=UGP2PE=1SV=1;tr|…	7433200	48277000	4236500	62572000	13232000	119570000	11687000	22072000	125120000	65816000	-0.304825	#NUM!
sp|Q9BXR0|TGT_HUMANQueuinetRNA-ribosyltransferasecatalyticsubunit1OS=HomosapiensGN=QTRT1PE=1SV=3	5087800	1	1	2332700	8362000	2068800	1	1	1	723400	0.94017	1.46063e-05
sp|P98088|MUC5A_HUMANMucin-5ACOS=HomosapiensGN=MUC5ACPE=1SV=4;tr|A0A0G2JM87|A0A0G2JM87_HUMANMucin-2OS=HomosapiensGN=MUC2PE=1SV=1;tr|A0A0G2JR65|A0A0G2JR65_HUMANMucin-2OS=HomosapiensGN=MUC2PE=1SV=1;sp|Q02817|MUC2_HUMANMucin-2OS=HomosapiensGN=MUC2PE=1SV=2	1979100000	4640700000	165310000	3792200000	810750000	1905000000	1225100000	144670000	667670000	270240000	0.188084	0.599919
sp|P62263|RS14_HUMAN40SribosomalproteinS14OS=HomosapiensGN=RPS14PE=1SV=3;tr|H0YB22|H0YB22_HUMAN40SribosomalproteinS14(Fragment)OS=HomosapiensGN=RPS14PE=1SV=1;tr|E5RH77|E5RH77_HUMAN40SribosomalproteinS14OS=HomosapiensGN=RPS14PE=1SV=1	7631500	1	4452400	5269900	1	1	1	1	3969400	1	0.41724	0.223239
sp|Q9H223|EHD4_HUMANEHdomain-containingprotein4OS=HomosapiensGN=EHD4PE=1SV=1	22308000	15922000	1	15910000	1	29419000	1	53526000	23820000	22998000	-0.283053	#NUM!
tr|B4DLR8|B4DLR8_HUMANNAD(P)Hdehydrogenase[quinone]1OS=HomosapiensGN=NQO1PE=1SV=1;tr|H3BNV2|H3BNV2_HUMANNAD(P)Hdehydrogenase[quinone]1OS=HomosapiensGN=NQO1PE=1SV=1;sp|P15559|NQO1_HUMANNAD(P)Hdehydrogenase[quinone]1OS=HomosapiensGN=NQO1PE=1SV=1;tr|H3BRK3|H3BRK3_HUMANNAD(P)Hdehydrogenase[quinone]1OS=HomosapiensGN=NQO1PE=1SV=1	30857000	77214000	1	127100000	1	1853300	1	1	1	34770000	0.183614	0.608801
sp|Q8NFJ5|RAI3_HUMANRetinoicacid-inducedprotein3OS=HomosapiensGN=GPRC5APE=1SV=2;tr|F5GWG3|F5GWG3_HUMANRetinoicacid-inducedprotein3(Fragment)OS=HomosapiensGN=GPRC5APE=1SV=8;tr|H0YFN2|H0YFN2_HUMANRetinoicacid-inducedprotein3(Fragment)OS=HomosapiensGN=GPRC5APE=1SV=1	1	18630000	884790	8861900	1	688170000	37495000	24687000	14211000	272620000	-0.25773	#NUM!
tr|K7EMA7|K7EMA7_HUMAN60SribosomalproteinL23aOS=HomosapiensGN=RPL23APE=1SV=1;sp|P62750|RL23A_HUMAN60SribosomalproteinL23aOS=HomosapiensGN=RPL23APE=1SV=1;tr|H7BY10|H7BY10_HUMAN60SribosomalproteinL23a(Fragment)OS=HomosapiensGN=RPL23APE=1SV=1;tr|K7EJV9|K7EJV9_HUMAN60SribosomalproteinL23a(Fragment)OS=HomosapiensGN=RPL23APE=1SV=1;tr|K7ERT8|K7ERT8_HUMAN60SribosomalproteinL23a(Fragment)OS=HomosapiensGN=…	5096800	3296300	9202200	4858300	1	1	1	1687900	6044000	1	-0.0275429	#NUM!
sp|P11021|GRP78_HUMAN78kDaglucose-regulatedproteinOS=HomosapiensGN=HSPA5PE=1SV=2	11116000	31092000	40171000	136430000	7476000	12335000	2067500	2625600	23094000	1	0.162632	0.651062
tr|H0Y512|H0Y512_HUMANAdipocyteplasmamembrane-associatedprotein(Fragment)OS=HomosapiensGN=APMAPPE=1SV=1;sp|Q9HDC9|APMAP_HUMANAdipocyteplasmamembrane-associatedproteinOS=HomosapiensGN=APMAPPE=1SV=2	23968000	61709000	1	18226000	63482000	8560700	1	38256000	8976100	1	0.445245	0.189899
sp|Q9NZ08|ERAP1_HUMANEndoplasmicreticulumaminopeptidase1OS=HomosapiensGN=ERAP1PE=1SV=3	4176300	3708300	1	5625500	1	1	1	1	3309000	1	0.350301	0.315018
sp|Q13263|TIF1B_HUMANTranscriptionintermediaryfactor1-betaOS=HomosapiensGN=TRIM28PE=1SV=5;tr|M0R0K9|M0R0K9_HUMANTranscriptionintermediaryfactor1-beta(Fragment)OS=HomosapiensGN=TRIM28PE=1SV=1	1	1	1	1983000	1	1	1	17626000	18310000	1	-0.313609	#NUM!
tr|A0A075B730|A0A075B730_HUMANEpiplakinOS=HomosapiensGN=EPPK1PE=1SV=2;tr|A0A087X1U6|A0A087X1U6_HUMANEpiplakinOS=HomosapiensGN=EPPK1PE=1SV=1;sp|P58107|EPIPL_HUMANEpiplakinOS=HomosapiensGN=EPPK1PE=1SV=2	23872000	68763000	1	23615000	1	1	1	2622800	8001500	8309000	0.0406537	0.910659
sp|P28070|PSB4_HUMANProteasomesubunitbetatype-4OS=HomosapiensGN=PSMB4PE=1SV=4	3712300	8734800	1	10606000	1	8010200	3140200	13142000	49159000	14272000	-0.303898	#NUM!
sp|Q86X76|NIT1_HUMANNitrilasehomolog1OS=HomosapiensGN=NIT1PE=1SV=2	8039400	6877700	1	1	22401000	1	1	2545800	3019700	1	0.74614	0.00999146
sp|Q8IXQ6|PARP9_HUMANPoly[ADP-ribose]polymerase9OS=HomosapiensGN=PARP9PE=1SV=2	1	10434000	1	16649000	1	1	1	1	623950	1	0.103713	0.774076
sp|P11413|G6PD_HUMANGlucose-6-phosphate1-dehydrogenaseOS=HomosapiensGN=G6PDPE=1SV=4;tr|E7EM57|E7EM57_HUMANGlucose-6-phosphate1-dehydrogenase(Fragment)OS=HomosapiensGN=G6PDPE=1SV=1;tr|E7EUI8|E7EUI8_HUMANGlucose-6-phosphate1-dehydrogenase(Fragment)OS=HomosapiensGN=G6PDPE=1SV=8;tr|E9PD92|E9PD92_HUMANGlucose-6-phosphate1-dehydrogenase(Fragment)OS=HomosapiensGN=G6PDPE=1SV=1	1	28537000	1	36653000	14496000	65159000	5453600	59462000	142530000	6228800	-0.277236	#NUM!
sp|P35247|SFTPD_HUMANPulmonarysurfactant-associatedproteinDOS=HomosapiensGN=SFTPDPE=1SV=3;tr|Q5T0M2|Q5T0M2_HUMANPulmonarysurfactant-associatedproteinD(Fragment)OS=HomosapiensGN=SFTPDPE=4SV=1	3301100000	1929700000	407160000	1976400000	1	852370000	166050000	81724000	123460000	1432800000	0.390862	0.257399
sp|P06733|ENOA_HUMANAlpha-enolaseOS=HomosapiensGN=ENO1PE=1SV=2;tr|K7EM90|K7EM90_HUMANAlpha-enolase(Fragment)OS=HomosapiensGN=ENO1PE=1SV=1;tr|F5H1C3|F5H1C3_HUMANGamma-enolase(Fragment)OS=HomosapiensGN=ENO2PE=1SV=1;tr|E5RI09|E5RI09_HUMANBeta-enolase(Fragment)OS=HomosapiensGN=ENO3PE=1SV=1;tr|E5RG95|E5RG95_HUMANBeta-enolase(Fragment)OS=HomosapiensGN=ENO3PE=1SV=1;tr|K7EPM1|K7EPM1_HUMANBeta-enolase(Fra…	175600000	208730000	35039000	125330000	57456000	227940000	109280000	78986000	343520000	600740000	-0.283796	#NUM!
tr|I3L1P8|I3L1P8_HUMANMitochondrial2-oxoglutarate/malatecarrierprotein(Fragment)OS=HomosapiensGN=SLC25A11PE=1SV=1;sp|Q02978|M2OM_HUMANMitochondrial2-oxoglutarate/malatecarrierproteinOS=HomosapiensGN=SLC25A11PE=1SV=3	9149400	6500500	1	16073000	1	1	1	4888200	2757600	1	0.352382	0.311914
sp|P45974|UBP5_HUMANUbiquitincarboxyl-terminalhydrolase5OS=HomosapiensGN=USP5PE=1SV=2	2070300	1	1	1	1	1	21873000	5427900	5288600	1	-0.264412	#NUM!
sp|Q9Y230|RUVB2_HUMANRuvB-like2OS=HomosapiensGN=RUVBL2PE=1SV=3;tr|X6R2L4|X6R2L4_HUMANRuvB-likehelicaseOS=HomosapiensGN=RUVBL2PE=1SV=1;tr|M0R0Y3|M0R0Y3_HUMANRuvB-likehelicaseOS=HomosapiensGN=RUVBL2PE=1SV=1;tr|M0QXI6|M0QXI6_HUMANRuvB-likehelicase(Fragment)OS=HomosapiensGN=RUVBL2PE=1SV=1;tr|M0R0Z0|M0R0Z0_HUMANRuvB-likehelicaseOS=HomosapiensGN=RUVBL2PE=1SV=1;tr|M0QXZ7|M0QXZ7_HUMANRuvB-like2OS=Homosap…	17155000	16055000	1	15696000	1	31826000	1	32186000	23362000	15704000	-0.270543	#NUM!
sp|P04406|G3P_HUMANGlyceraldehyde-3-phosphatedehydrogenaseOS=HomosapiensGN=GAPDHPE=1SV=3;tr|E7EUT5|E7EUT5_HUMANGlyceraldehyde-3-phosphatedehydrogenaseOS=HomosapiensGN=GAPDHPE=1SV=1;sp|O14556|G3PT_HUMANGlyceraldehyde-3-phosphatedehydrogenase,testis-specificOS=HomosapiensGN=GAPDHSPE=1SV=2	66077000	132290000	103960000	385140000	946250000	486720000	497180000	643350000	698810000	585130000	0.0976893	0.786948
tr|B7Z685|B7Z685_HUMANGuanylatecyclase1,soluble,beta3,isoformCRA_cOS=HomosapiensGN=GUCY1B3PE=1SV=1;tr|D6RC99|D6RC99_HUMANGuanylatecyclasesolublesubunitbeta-1OS=HomosapiensGN=GUCY1B3PE=1SV=1;sp|Q02153|GCYB1_HUMANGuanylatecyclasesolublesubunitbeta-1OS=HomosapiensGN=GUCY1B3PE=1SV=1;tr|E9PCN2|E9PCN2_HUMANGuanylatecyclasesolublesubunitbeta-1OS=HomosapiensGN=GUCY1B3PE=1SV=1	8560700	1	36963000	9914800	1	1	3980000	1	1	1	-0.07523	#NUM!
sp|P57737|CORO7_HUMANCoronin-7OS=HomosapiensGN=CORO7PE=1SV=2;tr|A0A0A6YYL4|A0A0A6YYL4_HUMANCoroninOS=HomosapiensGN=CORO7-PAM16PE=3SV=1;tr|I3L359|I3L359_HUMANCoronin-7OS=HomosapiensGN=CORO7PE=4SV=1;tr|I3L351|I3L351_HUMANCoronin-7(Fragment)OS=HomosapiensGN=CORO7PE=4SV=1;tr|I3L442|I3L442_HUMANCoronin-7(Fragment)OS=HomosapiensGN=CORO7PE=4SV=1;tr|I3L426|I3L426_HUMANCoronin(Fragment)OS=HomosapiensGN=CO…	26662000	7746400	1672300	15343000	1	1	1	1	11034000	1	0.529089	0.108279
sp|O95837|GNA14_HUMANGuaninenucleotide-bindingproteinsubunitalpha-14OS=HomosapiensGN=GNA14PE=1SV=1	3446600	1	1	1114800	1	3092200	1	9706300	7125500	1	-0.190546	#NUM!
tr|A6NKZ2|A6NKZ2_HUMANN-acylglucosamine2-epimeraseOS=HomosapiensGN=RENBPPE=1SV=2;sp|P51606|RENBP_HUMANN-acylglucosamine2-epimeraseOS=HomosapiensGN=RENBPPE=1SV=2	1	1	4907600	1	1	8600500	1	1	3609900	10845000	-0.428328	#NUM!
tr|F6U784|F6U784_HUMANRas-relatedproteinRap-2aOS=HomosapiensGN=RAP2APE=4SV=1;sp|Q9Y3L5|RAP2C_HUMANRas-relatedproteinRap-2cOS=HomosapiensGN=RAP2CPE=1SV=1;sp|P61225|RAP2B_HUMANRas-relatedproteinRap-2bOS=HomosapiensGN=RAP2BPE=1SV=1;sp|P10114|RAP2A_HUMANRas-relatedproteinRap-2aOS=HomosapiensGN=RAP2APE=1SV=1	1	8530200	4845700	5772700	1	1	1	4738600	1	1	-0.263168	#NUM!
sp|P14923|PLAK_HUMANJunctionplakoglobinOS=HomosapiensGN=JUPPE=1SV=3;tr|C9JTX4|C9JTX4_HUMANJunctionplakoglobin(Fragment)OS=HomosapiensGN=JUPPE=1SV=1;tr|C9J826|C9J826_HUMANJunctionplakoglobin(Fragment)OS=HomosapiensGN=JUPPE=1SV=8;tr|C9JK18|C9JK18_HUMANJunctionplakoglobin(Fragment)OS=HomosapiensGN=JUPPE=1SV=8;tr|C9JKY1|C9JKY1_HUMANJunctionplakoglobin(Fragment)OS=HomosapiensGN=JUPPE=1SV=8	350420	1	1	1	1	45955000	10421000	4007800	1626200	1589300	-0.227	#NUM!
sp|Q9BVM2|DPCD_HUMANProteinDPCDOS=HomosapiensGN=DPCDPE=1SV=2;tr|Q5JQQ2|Q5JQQ2_HUMANProteinDPCD(Fragment)OS=HomosapiensGN=DPCDPE=1SV=1;tr|Q5JQQ4|Q5JQQ4_HUMANProteinDPCDOS=HomosapiensGN=DPCDPE=1SV=1	1	24370000	1	18303000	1	1	1	2797000	1	1	-0.030972	#NUM!
sp|P81605|DCD_HUMANDermcidinOS=HomosapiensGN=DCDPE=1SV=2	18772000	13583000	2613700	13215000	1	47798000	1	1	45775000	41326000	-0.212243	#NUM!
sp|Q96RY7|IF140_HUMANIntraflagellartransportprotein140homologOS=HomosapiensGN=IFT140PE=1SV=1	1	164360000	1	15801000	54283000	1	1	3343400	1	1	0.049371	0.891584
sp|P25815|S100P_HUMANProteinS100-POS=HomosapiensGN=S100PPE=1SV=2	20836000	17967000	94994000	16097000	122170000	223790000	31511000	967360000	366360000	1	-0.318384	#NUM!
sp|P61006|RAB8A_HUMANRas-relatedproteinRab-8AOS=HomosapiensGN=RAB8APE=1SV=1	2528300	1	1	1158600	1	3448000	1	6666200	2249600	794570	-0.175376	#NUM!
sp|P22392|NDKB_HUMANNucleosidediphosphatekinaseBOS=HomosapiensGN=NME2PE=1SV=1;tr|Q32Q12|Q32Q12_HUMANNucleosidediphosphatekinaseOS=HomosapiensGN=NME1-NME2PE=1SV=1;sp|O60361|NDK8_HUMANPutativenucleosidediphosphatekinaseOS=HomosapiensGN=NME2P1PE=5SV=1;tr|J3KPD9|J3KPD9_HUMANNME1-NME2readthroughOS=HomosapiensGN=NME1-NME2PE=1SV=1;tr|F6XY72|F6XY72_HUMANHCG2001850,isoformCRA_cOS=HomosapiensGN=NME2PE=1SV=2	1	6336600	1	4872000	1	17950000	2191600	4453900	15973000	1	-0.326022	#NUM!
tr|A0A0A0MRM8|A0A0A0MRM8_HUMANUnconventionalmyosin-VIOS=HomosapiensGN=MYO6PE=1SV=1;tr|A0A0D9SGC1|A0A0D9SGC1_HUMANUnconventionalmyosin-VIOS=HomosapiensGN=MYO6PE=1SV=1;sp|Q9UM54|MYO6_HUMANUnconventionalmyosin-VIOS=HomosapiensGN=MYO6PE=1SV=4;tr|E7EW20|E7EW20_HUMANUnconventionalmyosin-VIOS=HomosapiensGN=MYO6PE=1SV=2	1	1	9505000	1	1	35810000	1868600	8754400	12750000	1	-0.346502	#NUM!
tr|F5GZQ3|F5GZQ3_HUMANTrifunctionalenzymesubunitbeta,mitochondrialOS=HomosapiensGN=HADHBPE=1SV=1;sp|P55084|ECHB_HUMANTrifunctionalenzymesubunitbeta,mitochondrialOS=HomosapiensGN=HADHBPE=1SV=3;tr|B5MD38|B5MD38_HUMANTrifunctionalenzymesubunitbeta,mitochondrialOS=HomosapiensGN=HADHBPE=1SV=1	5643600	5878300	1	24514000	1	1	1	1	2409400	1	0.311109	0.376304
tr|C9JXB8|C9JXB8_HUMAN60SribosomalproteinL24OS=HomosapiensGN=RPL24PE=1SV=1;tr|C9JNW5|C9JNW5_HUMAN60SribosomalproteinL24OS=HomosapiensGN=RPL24PE=1SV=1;sp|P83731|RL24_HUMAN60SribosomalproteinL24OS=HomosapiensGN=RPL24PE=1SV=1	1	1	5145300	1	4973800	1	1	1	875630	1	0.270041	0.446038
sp|P32119|PRDX2_HUMANPeroxiredoxin-2OS=HomosapiensGN=PRDX2PE=1SV=5;tr|A6NIW5|A6NIW5_HUMANPeroxiredoxin2,isoformCRA_aOS=HomosapiensGN=PRDX2PE=1SV=2	12218000	1	1	7206300	18495000	19276000	5007600	47904000	84616000	1	-0.120756	#NUM!
tr|C9JGI3|C9JGI3_HUMANThymidinephosphorylase(Fragment)OS=HomosapiensGN=TYMPPE=1SV=1;sp|P19971|TYPH_HUMANThymidinephosphorylaseOS=HomosapiensGN=TYMPPE=1SV=2;tr|A0A1W2PP80|A0A1W2PP80_HUMANProteinSCO2homolog,mitochondrial(Fragment)OS=HomosapiensGN=SCO2PE=4SV=1	31835000	44723000	1	17773000	48651000	88664000	9524400	23797000	77130000	203650000	-0.187968	#NUM!
sp|O00160|MYO1F_HUMANUnconventionalmyosin-IfOS=HomosapiensGN=MYO1FPE=1SV=3;tr|M0QXU2|M0QXU2_HUMANUnconventionalmyosin-If(Fragment)OS=HomosapiensGN=MYO1FPE=1SV=1;tr|H0YLE5|H0YLE5_HUMANUnconventionalmyosin-Ie(Fragment)OS=HomosapiensGN=MYO1EPE=1SV=1;sp|Q12965|MYO1E_HUMANUnconventionalmyosin-IeOS=HomosapiensGN=MYO1EPE=1SV=2	14312000	4245300	1	6233200	1	1	1	1	4440700	1	0.550622	0.0916548
tr|E7EP17|E7EP17_HUMANDyneinheavychain9,axonemalOS=HomosapiensGN=DNAH9PE=1SV=1;sp|Q9NYC9|DYH9_HUMANDyneinheavychain9,axonemalOS=HomosapiensGN=DNAH9PE=1SV=3;tr|J3QQK8|J3QQK8_HUMANDyneinheavychain9,axonemalOS=HomosapiensGN=DNAH9PE=4SV=1;sp|Q9P225|DYH2_HUMANDyneinheavychain2,axonemalOS=HomosapiensGN=DNAH2PE=2SV=3;sp|Q96DT5|DYH11_HUMANDyneinheavychain11,axonemalOS=HomosapiensGN=DNAH11PE=1SV=4;tr|A0A0…	36839000	20253000	1	9665600	1	1	1	1	12638000	1	0.446215	0.188799
tr|Q5T0D2|Q5T0D2_HUMANUMP-CMPkinaseOS=HomosapiensGN=CMPK1PE=1SV=1;sp|P30085|KCY_HUMANUMP-CMPkinaseOS=HomosapiensGN=CMPK1PE=1SV=3	13807000	32530000	1	22464000	1	29147000	1	12551000	97775000	71068000	-0.318113	#NUM!
sp|Q9UMR7|CLC4A_HUMANC-typelectindomainfamily4memberAOS=HomosapiensGN=CLEC4APE=1SV=1	2428700	1	1	2167200	1	1	1	437090	1	1	0.584604	0.0688714
sp|Q01082|SPTB2_HUMANSpectrinbetachain,non-erythrocytic1OS=HomosapiensGN=SPTBN1PE=1SV=2;tr|A0A087WUZ3|A0A087WUZ3_HUMANSpectrinbetachainOS=HomosapiensGN=SPTBN1PE=1SV=1;tr|F8W6C1|F8W6C1_HUMANSpectrinbetachain,non-erythrocytic1(Fragment)OS=HomosapiensGN=SPTBN1PE=1SV=1	6923500	1	1	1	9930500	26352000	1	16659000	10600000	1791000	-0.00659919	#NUM!
sp|P20073|ANXA7_HUMANAnnexinA7OS=HomosapiensGN=ANXA7PE=1SV=3	9704900	10873000	5028600	14423000	1	25684000	32551000	74562000	348370000	14926000	-0.256453	#NUM!
sp|P25311|ZA2G_HUMANZinc-alpha-2-glycoproteinOS=HomosapiensGN=AZGP1PE=1SV=2;tr|C9JEV0|C9JEV0_HUMANZinc-alpha-2-glycoproteinOS=HomosapiensGN=AZGP1PE=1SV=1	8101400	10571000	1	15176000	1	1	1	3974100	6433700	1	0.237841	0.504333
tr|R4GN98|R4GN98_HUMANProteinS100(Fragment)OS=HomosapiensGN=S100A6PE=1SV=1;sp|P06703|S10A6_HUMANProteinS100-A6OS=HomosapiensGN=S100A6PE=1SV=1	3115700	47258000	1	32764000	1	291710000	1	16074000	1106300000	142070000	-0.237635	#NUM!
tr|C9J0K6|C9J0K6_HUMANSorcinOS=HomosapiensGN=SRIPE=1SV=1;sp|P30626|SORCN_HUMANSorcinOS=HomosapiensGN=SRIPE=1SV=1;tr|B4DHQ6|B4DHQ6_HUMANSorcinOS=HomosapiensGN=SRIPE=1SV=1	63385000	33432000	6470500	21216000	74830000	32395000	18410000	12675000	17596000	23553000	0.879393	0.000387429
sp|Q92572|AP3S1_HUMANAP-3complexsubunitsigma-1OS=HomosapiensGN=AP3S1PE=1SV=1	1	1	1	1	631940	2100300	1	8116300	1228200	1	-0.29438	#NUM!
sp|P07358|CO8B_HUMANComplementcomponentC8betachainOS=HomosapiensGN=C8BPE=1SV=3;tr|F5GY80|F5GY80_HUMANComplementcomponentC8betachainOS=HomosapiensGN=C8BPE=1SV=1;tr|F5H7G1|F5H7G1_HUMANComplementcomponentC8betachainOS=HomosapiensGN=C8BPE=1SV=1	20953000	27253000	118520000	17824000	1	1	1	1	29791000	1	-0.199949	#NUM!
sp|P10599|THIO_HUMANThioredoxinOS=HomosapiensGN=TXNPE=1SV=3	70958000	10650000	1	1	1	162600000	2106500	33476000	69431000	34211000	-0.0837229	#NUM!
tr|E9PP36|E9PP36_HUMAN60SribosomalproteinL8OS=HomosapiensGN=RPL8PE=1SV=1;tr|E9PKZ0|E9PKZ0_HUMAN60SribosomalproteinL8(Fragment)OS=HomosapiensGN=RPL8PE=1SV=1;tr|E9PKU4|E9PKU4_HUMAN60SribosomalproteinL8(Fragment)OS=HomosapiensGN=RPL8PE=1SV=1;sp|P62917|RL8_HUMAN60SribosomalproteinL8OS=HomosapiensGN=RPL8PE=1SV=2	1	1	1	1	4113100	5608900	1	5263700	3785200	1	-0.0291221	#NUM!
sp|Q99613|EIF3C_HUMANEukaryotictranslationinitiationfactor3subunitCOS=HomosapiensGN=EIF3CPE=1SV=1;sp|B5ME19|EIFCL_HUMANEukaryotictranslationinitiationfactor3subunitC-likeproteinOS=HomosapiensGN=EIF3CLPE=3SV=1	1980700	3017700	1	1078800	1	3405600	1	21793000	8738300	897690	-0.344619	#NUM!
sp|P63261|ACTG_HUMANActin,cytoplasmic2OS=HomosapiensGN=ACTG1PE=1SV=1;tr|I3L3I0|I3L3I0_HUMANActin,cytoplasmic2(Fragment)OS=HomosapiensGN=ACTG1PE=1SV=1;tr|I3L1U9|I3L1U9_HUMANActin,cytoplasmic2(Fragment)OS=HomosapiensGN=ACTG1PE=1SV=1;tr|I3L3R2|I3L3R2_HUMANActin,cytoplasmic2(Fragment)OS=HomosapiensGN=ACTG1PE=1SV=1;tr|J3KT65|J3KT65_HUMANActin,cytoplasmic2OS=HomosapiensGN=ACTG1PE=1SV=1	7036900000	6877700000	3068000000	12131000000	1887200000	8592200000	9331100000	11098000000	5921300000	10076000000	-0.329703	#NUM!
tr|J3QTA2|J3QTA2_HUMANBAGfamilymolecularchaperoneregulator1OS=HomosapiensGN=BAG1PE=1SV=1;sp|Q99933|BAG1_HUMANBAGfamilymolecularchaperoneregulator1OS=HomosapiensGN=BAG1PE=1SV=4	4789700	8791400	1	1	1	1	1	1	1030200	1	0.103263	0.775035
sp|P19105|ML12A_HUMANMyosinregulatorylightchain12AOS=HomosapiensGN=MYL12APE=1SV=2;sp|O14950|ML12B_HUMANMyosinregulatorylightchain12BOS=HomosapiensGN=MYL12BPE=1SV=2;tr|J3QRS3|J3QRS3_HUMANMyosinregulatorylightchain12AOS=HomosapiensGN=MYL12APE=1SV=1;sp|P24844|MYL9_HUMANMyosinregulatorylightpolypeptide9OS=HomosapiensGN=MYL9PE=1SV=4;tr|J3KTJ1|J3KTJ1_HUMANMyosinregulatorylightchain12A(Fragment)OS=Homos…	124200000	146310000	46368000	93084000	44303000	79418000	1	94673000	52883000	44868000	0.193769	0.58869
sp|P02671|FIBA_HUMANFibrinogenalphachainOS=HomosapiensGN=FGAPE=1SV=2;tr|A0A087WUA0|A0A087WUA0_HUMANFibrinogenalphachainOS=HomosapiensGN=FGAPE=1SV=1	124740000	14945000	137780000	57307000	1	80483000	311230000	285100000	82719000	26480000	-0.372746	#NUM!
sp|Q9Y696|CLIC4_HUMANChlorideintracellularchannelprotein4OS=HomosapiensGN=CLIC4PE=1SV=4	1	6073200	1	6973900	1	11731000	1	7165700	16756000	1713700	-0.340421	#NUM!
sp|O76041|NEBL_HUMANNebuletteOS=HomosapiensGN=NEBLPE=1SV=1	593900	1	1	1	1	2268200	1	1	3737100	1	-0.144949	#NUM!
sp|P00558|PGK1_HUMANPhosphoglyceratekinase1OS=HomosapiensGN=PGK1PE=1SV=3;sp|P07205|PGK2_HUMANPhosphoglyceratekinase2OS=HomosapiensGN=PGK2PE=1SV=3	16348000	348450000	45318000	228050000	32237000	579110000	195830000	44737000	713890000	149950000	-0.360668	#NUM!
sp|O00148|DX39A_HUMANATP-dependentRNAhelicaseDDX39AOS=HomosapiensGN=DDX39APE=1SV=2;sp|Q13838|DX39B_HUMANSpliceosomeRNAhelicaseDDX39BOS=HomosapiensGN=DDX39BPE=1SV=1;tr|F6S4E6|F6S4E6_HUMANSpliceosomeRNAhelicaseDDX39B(Fragment)OS=HomosapiensGN=DDX39BPE=1SV=1;tr|A0A0A0MT12|A0A0A0MT12_HUMANSpliceosomeRNAhelicaseDDX39B(Fragment)OS=HomosapiensGN=DDX39BPE=1SV=6;tr|F6TRA5|F6TRA5_HUMANSpliceosomeRNAhelicas…	14605000	10627000	7748300	14392000	50387000	1	3978600	14046000	16642000	4682700	0.719617	0.0150083
sp|Q9UBQ7|GRHPR_HUMANGlyoxylatereductase/hydroxypyruvatereductaseOS=HomosapiensGN=GRHPRPE=1SV=1;tr|U3KQ56|U3KQ56_HUMANGlyoxylatereductase/hydroxypyruvatereductaseOS=HomosapiensGN=GRHPRPE=1SV=1	1	43459000	1	27540000	1	1	1	1	7560900	1	-0.0542359	#NUM!
sp|P25398|RS12_HUMAN40SribosomalproteinS12OS=HomosapiensGN=RPS12PE=1SV=3	1	1	2623700	1	1	1	1	9465500	15141000	1	-0.344348	#NUM!
tr|E7EQG2|E7EQG2_HUMANEukaryoticinitiationfactor4A-IIOS=HomosapiensGN=EIF4A2PE=1SV=1;sp|Q14240|IF4A2_HUMANEukaryoticinitiationfactor4A-IIOS=HomosapiensGN=EIF4A2PE=1SV=2;tr|J3KSN7|J3KSN7_HUMANEukaryoticinitiationfactor4A-II(Fragment)OS=HomosapiensGN=EIF4A2PE=1SV=1;tr|J3KT04|J3KT04_HUMANEukaryoticinitiationfactor4A-I(Fragment)OS=HomosapiensGN=EIF4A1PE=1SV=1;tr|J3KS93|J3KS93_HUMANEukaryoticinitiatio…	12362000	6514600	1	12552000	35339000	8936900	1	1	12741000	1	0.82346	0.00212734
sp|Q9NT62|ATG3_HUMANUbiquitin-like-conjugatingenzymeATG3OS=HomosapiensGN=ATG3PE=1SV=1;tr|F8WDI0|F8WDI0_HUMANUbiquitin-like-conjugatingenzymeATG3OS=HomosapiensGN=ATG3PE=1SV=1	36934000	11645000	7544900	12912000	1	1	9102000	10104000	4639300	1	0.425447	0.213154
sp|Q12907|LMAN2_HUMANVesicularintegral-membraneproteinVIP36OS=HomosapiensGN=LMAN2PE=1SV=1	11032000	2479000	1	7967100	1	1	1	820090	4337500	1	0.543152	0.0972259
tr|G3V295|G3V295_HUMANProteasomesubunitalphatypeOS=HomosapiensGN=PSMA6PE=1SV=1;sp|P60900|PSA6_HUMANProteasomesubunitalphatype-6OS=HomosapiensGN=PSMA6PE=1SV=1;tr|G3V5Z7|G3V5Z7_HUMANProteasomesubunitalphatypeOS=HomosapiensGN=PSMA6PE=1SV=1;tr|G3V3U4|G3V3U4_HUMANProteasomesubunitalphatypeOS=HomosapiensGN=PSMA6PE=1SV=1;tr|G3V3I1|G3V3I1_HUMANProteasomesubunitalphatypeOS=HomosapiensGN=PSMA6PE=1SV=1;tr|G…	35649000	30690000	1	12712000	1	18417000	1	66171000	78296000	29263000	-0.264699	#NUM!
sp|P53396|ACLY_HUMANATP-citratesynthaseOS=HomosapiensGN=ACLYPE=1SV=3;tr|K7ESG8|K7ESG8_HUMANATP-citratesynthase(Fragment)OS=HomosapiensGN=ACLYPE=1SV=1;tr|K7EIE7|K7EIE7_HUMANATP-citratesynthase(Fragment)OS=HomosapiensGN=ACLYPE=1SV=1	1	510600	1	379060	5587100	61809000	1	14652000	797700	8111900	-0.18676	#NUM!
sp|P06727|APOA4_HUMANApolipoproteinA-IVOS=HomosapiensGN=APOA4PE=1SV=3	190780000	164390000	1120200000	216860000	13388000	5505700	14576000	121000000	173480000	21302000	-0.198781	#NUM!
tr|H0YLF3|H0YLF3_HUMANBeta-2-microglobulin(Fragment)OS=HomosapiensGN=B2MPE=1SV=1;tr|F5H6I0|F5H6I0_HUMANBeta-2-microglobulinOS=HomosapiensGN=B2MPE=1SV=2;sp|P61769|B2MG_HUMANBeta-2-microglobulinOS=HomosapiensGN=B2MPE=1SV=1	45585000	55543000	13923000	99625000	2907500	9781400	12897000	51014000	3181600	10711000	0.165124	0.645994
tr|A0A1W2PRZ7|A0A1W2PRZ7_HUMANHeterogeneousnuclearribonucleoproteinU(Fragment)OS=HomosapiensGN=HNRNPUPE=1SV=1;tr|A0A1W2PQ74|A0A1W2PQ74_HUMANHeterogeneousnuclearribonucleoproteinUOS=HomosapiensGN=HNRNPUPE=1SV=1;tr|A0A1W2PQL0|A0A1W2PQL0_HUMANHeterogeneousnuclearribonucleoproteinU(Fragment)OS=HomosapiensGN=HNRNPUPE=1SV=1;tr|A0A1W2PP34|A0A1W2PP34_HUMANHeterogeneousnuclearribonucleoproteinUOS=Homosapi…	40402000	10968000	15755000	15385000	48124000	34882000	1	8411800	16343000	4827800	0.801391	0.00354609
sp|O43490|PROM1_HUMANProminin-1OS=HomosapiensGN=PROM1PE=1SV=1;tr|D6RIF3|D6RIF3_HUMANProminin-1(Fragment)OS=HomosapiensGN=PROM1PE=1SV=8	199420000	428050000	1	84662000	1	2633200	23278000	105110000	14276000	5377400	0.0420008	0.907708
sp|P01833|PIGR_HUMANPolymericimmunoglobulinreceptorOS=HomosapiensGN=PIGRPE=1SV=4	754590000	1469200000	614700000	829710000	195670000	419610000	1116800000	946550000	1819300000	3816100000	-0.427674	#NUM!
sp|P31146|COR1A_HUMANCoronin-1AOS=HomosapiensGN=CORO1APE=1SV=4;tr|H3BRY3|H3BRY3_HUMANCoroninOS=HomosapiensGN=CORO1APE=1SV=1;tr|H3BTU6|H3BTU6_HUMANCoronin(Fragment)OS=HomosapiensGN=CORO1APE=1SV=1;tr|H3BRJ0|H3BRJ0_HUMANCoronin(Fragment)OS=HomosapiensGN=CORO1APE=1SV=1;tr|H3BNA2|H3BNA2_HUMANCoronin(Fragment)OS=HomosapiensGN=CORO1APE=1SV=1;tr|H3BU76|H3BU76_HUMANCoronin(Fragment)OS=HomosapiensGN=CORO1A…	33856000	19224000	1785500	21102000	10011000	25412000	61682000	288390000	54917000	5499100	-0.297422	#NUM!
tr|G3V3R6|G3V3R6_HUMANGalectinOS=HomosapiensGN=LGALS3PE=1SV=1;sp|P17931|LEG3_HUMANGalectin-3OS=HomosapiensGN=LGALS3PE=1SV=5	13153000	1	15551000	38061000	1	11299000	1	1	5782100	1	0.26191	0.460471
sp|Q8TDL5|BPIB1_HUMANBPIfold-containingfamilyBmember1OS=HomosapiensGN=BPIFB1PE=1SV=1;tr|A2A2R0|A2A2R0_HUMANBPIfold-containingfamilyBmember1(Fragment)OS=HomosapiensGN=BPIFB1PE=1SV=1	2653000000	8235900000	258120000	4332900000	212050000	4991900000	5870700000	8999000000	3765100000	4017400000	-0.52699	#NUM!
sp|Q9P2R3|ANFY1_HUMANRabankyrin-5OS=HomosapiensGN=ANKFY1PE=1SV=2;tr|I3L3P8|I3L3P8_HUMANRabankyrin-5OS=HomosapiensGN=ANKFY1PE=1SV=1	4955500	1	1	12435000	9269200	6360200	1	1	1580700	1	0.730304	0.0128126
sp|Q7Z406|MYH14_HUMANMyosin-14OS=HomosapiensGN=MYH14PE=1SV=2;tr|M0QY43|M0QY43_HUMANMyosin-14(Fragment)OS=HomosapiensGN=MYH14PE=1SV=8;tr|A1L2Z2|A1L2Z2_HUMANMYH14proteinOS=HomosapiensGN=MYH14PE=1SV=1;tr|A0A0C4DFM8|A0A0C4DFM8_HUMANMyosin-14OS=HomosapiensGN=MYH14PE=1SV=1	62826000	13034000	6584600	22753000	1	51311000	13965000	151550000	73828000	5515100	-0.192793	#NUM!
sp|Q6XQN6|PNCB_HUMANNicotinatephosphoribosyltransferaseOS=HomosapiensGN=NAPRTPE=1SV=2;tr|C9J8U2|C9J8U2_HUMANNicotinatephosphoribosyltransferaseOS=HomosapiensGN=NAPRTPE=1SV=1;tr|G5E977|G5E977_HUMANNicotinatephosphoribosyltransferaseOS=HomosapiensGN=NAPRTPE=1SV=1;tr|A0A087WUT5|A0A087WUT5_HUMANNicotinatephosphoribosyltransferase(Fragment)OS=HomosapiensGN=NAPRTPE=1SV=1	1	14093000	1	1	1	8236700	1	10863000	11465000	6895200	-0.561646	#NUM!
sp|P21980|TGM2_HUMANProtein-glutaminegamma-glutamyltransferase2OS=HomosapiensGN=TGM2PE=1SV=2;tr|A2A299|A2A299_HUMANProtein-glutaminegamma-glutamyltransferase2(Fragment)OS=HomosapiensGN=TGM2PE=1SV=8;tr|A2A2A0|A2A2A0_HUMANProtein-glutaminegamma-glutamyltransferase2(Fragment)OS=HomosapiensGN=TGM2PE=1SV=8;sp|P49221|TGM4_HUMANProtein-glutaminegamma-glutamyltransferase4OS=HomosapiensGN=TGM4PE=1SV=2	376310000	242400000	42783000	214580000	1	451880000	194460000	278410000	297970000	207630000	-0.158527	#NUM!
sp|P40121|CAPG_HUMANMacrophage-cappingproteinOS=HomosapiensGN=CAPGPE=1SV=2;tr|E7ENU9|E7ENU9_HUMANMacrophage-cappingprotein(Fragment)OS=HomosapiensGN=CAPGPE=1SV=1;tr|H7C0X8|H7C0X8_HUMANMacrophage-cappingprotein(Fragment)OS=HomosapiensGN=CAPGPE=1SV=1;tr|B8ZZL6|B8ZZL6_HUMANMacrophage-cappingprotein(Fragment)OS=HomosapiensGN=CAPGPE=1SV=1	42855000	92152000	60613000	79420000	1	193330000	47831000	72326000	131950000	47047000	-0.462776	#NUM!
sp|Q8WUM4|PDC6I_HUMANProgrammedcelldeath6-interactingproteinOS=HomosapiensGN=PDCD6IPPE=1SV=1;tr|C9IZF9|C9IZF9_HUMANProgrammedcelldeath6-interactingprotein(Fragment)OS=HomosapiensGN=PDCD6IPPE=1SV=1;tr|F8WEQ7|F8WEQ7_HUMANProgrammedcelldeath6-interactingproteinOS=HomosapiensGN=PDCD6IPPE=1SV=1;tr|F8WBR8|F8WBR8_HUMANProgrammedcelldeath6-interactingproteinOS=HomosapiensGN=PDCD6IPPE=1SV=1;tr|F8WDK9|F8WD…	219760000	163810000	7509000	348360000	7350100	63842000	41053000	121720000	41467000	30768000	0.327862	0.349452
sp|P14868|SYDC_HUMANAspartate--tRNAligase,cytoplasmicOS=HomosapiensGN=DARSPE=1SV=2;tr|H7BZ35|H7BZ35_HUMANAspartate--tRNAligase,cytoplasmic(Fragment)OS=HomosapiensGN=DARSPE=1SV=1;tr|C9J7S3|C9J7S3_HUMANAspartate--tRNAligase,cytoplasmic(Fragment)OS=HomosapiensGN=DARSPE=1SV=8;tr|C9JLC1|C9JLC1_HUMANAspartate--tRNAligase,cytoplasmic(Fragment)OS=HomosapiensGN=DARSPE=1SV=1	2439000	1	2024100	3189000	1	14900000	1	28904000	1	1596300	-0.29927	#NUM!
sp|Q9BS26|ERP44_HUMANEndoplasmicreticulumresidentprotein44OS=HomosapiensGN=ERP44PE=1SV=1	1	1	1	2024500	1	1234500	1	13693000	4301700	1	-0.31041	#NUM!
sp|P62913|RL11_HUMAN60SribosomalproteinL11OS=HomosapiensGN=RPL11PE=1SV=2;tr|Q5VVC8|Q5VVC8_HUMAN60SribosomalproteinL11(Fragment)OS=HomosapiensGN=RPL11PE=1SV=1;tr|Q5VVC9|Q5VVC9_HUMAN60SribosomalproteinL11(Fragment)OS=HomosapiensGN=RPL11PE=1SV=1	12949000	5261400	15825000	9465100	9283600	1	1	20648000	3567400	1	0.19267	0.590856
sp|P08473|NEP_HUMANNeprilysinOS=HomosapiensGN=MMEPE=1SV=2	1	18034000	1	45850000	1	1	1	3922600	1568600	1	0.131864	0.714588
sp|Q13564|ULA1_HUMANNEDD8-activatingenzymeE1regulatorysubunitOS=HomosapiensGN=NAE1PE=1SV=1	1	1	1	884650	1	3277100	1	1	15517000	1050400	-0.198304	#NUM!
sp|Q9Y490|TLN1_HUMANTalin-1OS=HomosapiensGN=TLN1PE=1SV=3;sp|Q9Y4G6|TLN2_HUMANTalin-2OS=HomosapiensGN=TLN2PE=1SV=4;tr|A0A1B0GVU7|A0A1B0GVU7_HUMANTalin-2OS=HomosapiensGN=TLN2PE=1SV=1;tr|H0YMT1|H0YMT1_HUMANTalin-2(Fragment)OS=HomosapiensGN=TLN2PE=1SV=1	25642000	26267000	93143000	59732000	10226000	171620000	6344500	233360000	99561000	6919500	-0.413458	#NUM!
sp|Q96NY7|CLIC6_HUMANChlorideintracellularchannelprotein6OS=HomosapiensGN=CLIC6PE=2SV=3	213450000	69259000	8393700	50486000	1	1	1	10039000	41693000	37182000	0.491963	0.141066
sp|P60953|CDC42_HUMANCelldivisioncontrolprotein42homologOS=HomosapiensGN=CDC42PE=1SV=2;tr|Q5JYX0|Q5JYX0_HUMANCelldivisioncontrolprotein42homolog(Fragment)OS=HomosapiensGN=CDC42PE=1SV=1	1	57094000	1	1	1	215660000	1	7898800	1	118200000	-0.306071	#NUM!
tr|E7ESV4|E7ESV4_HUMANRas-relatedproteinRap-1b(Fragment)OS=HomosapiensGN=RAP1BPE=1SV=1;tr|F5H7Y6|F5H7Y6_HUMANRas-relatedproteinRap-1bOS=HomosapiensGN=RAP1BPE=1SV=1;sp|P61224|RAP1B_HUMANRas-relatedproteinRap-1bOS=HomosapiensGN=RAP1BPE=1SV=1;tr|F5GX62|F5GX62_HUMANRas-relatedproteinRap-1b(Fragment)OS=HomosapiensGN=RAP1BPE=1SV=1;tr|F5H004|F5H004_HUMANRas-relatedproteinRap-1b(Fragment)OS=HomosapiensGN…	94688000	180540000	13278000	113660000	210630000	31044000	1	178020000	84339000	18548000	0.445041	0.190131
tr|B7Z7P8|B7Z7P8_HUMANEukaryoticpeptidechainreleasefactorsubunit1OS=HomosapiensGN=ETF1PE=1SV=1;sp|P62495|ERF1_HUMANEukaryoticpeptidechainreleasefactorsubunit1OS=HomosapiensGN=ETF1PE=1SV=3	1	9343000	1	9801200	1	11651000	1	9920600	23754000	3648300	-0.351143	#NUM!
sp|P36955|PEDF_HUMANPigmentepithelium-derivedfactorOS=HomosapiensGN=SERPINF1PE=1SV=4;tr|I3L4N7|I3L4N7_HUMANPigmentepithelium-derivedfactor(Fragment)OS=HomosapiensGN=SERPINF1PE=1SV=1;CON__Q95121;tr|I3L4F9|I3L4F9_HUMANPigmentepithelium-derivedfactor(Fragment)OS=HomosapiensGN=SERPINF1PE=1SV=8;tr|I3L107|I3L107_HUMANPigmentepithelium-derivedfactor(Fragment)OS=HomosapiensGN=SERPINF1PE=1SV=1;tr|I3L4Z0|I…	14988000	35063000	15823000	30034000	1	20508000	25249000	1605200	327320000	107190000	-0.259122	#NUM!
sp|P07948|LYN_HUMANTyrosine-proteinkinaseLynOS=HomosapiensGN=LYNPE=1SV=3;tr|E5RJ37|E5RJ37_HUMANTyrosine-proteinkinaseLyn(Fragment)OS=HomosapiensGN=LYNPE=1SV=1;tr|H0Y3C5|H0Y3C5_HUMANTyrosine-proteinkinaseOS=HomosapiensGN=HCKPE=1SV=1;tr|J3KPD6|J3KPD6_HUMANTyrosine-proteinkinaseOS=HomosapiensGN=HCKPE=1SV=1;tr|F6SF04|F6SF04_HUMANTyrosine-proteinkinaseOS=HomosapiensGN=HCKPE=1SV=1;sp|P08631|HCK_HUMANTy…	13528000	51855000	1	12103000	15068000	1	25381000	3870600	1	1	0.0886346	0.80638
sp|P08603|CFAH_HUMANComplementfactorHOS=HomosapiensGN=CFHPE=1SV=4;tr|A0A087WYK9|A0A087WYK9_HUMANComplementfactorH-relatedprotein3OS=HomosapiensGN=CFHR3PE=1SV=1;tr|Q6NSD3|Q6NSD3_HUMANCFHR3proteinOS=HomosapiensGN=CFHR3PE=1SV=1;sp|Q02985|FHR3_HUMANComplementfactorH-relatedprotein3OS=HomosapiensGN=CFHR3PE=1SV=2	54328000	70729000	894600000	40691000	64073000	29541000	1	18415000	24815000	1	-0.191181	#NUM!
tr|Q5HY54|Q5HY54_HUMANFilamin-AOS=HomosapiensGN=FLNAPE=1SV=1;sp|P21333|FLNA_HUMANFilamin-AOS=HomosapiensGN=FLNAPE=1SV=4;tr|Q60FE5|Q60FE5_HUMANFilamin-AOS=HomosapiensGN=FLNAPE=1SV=1;tr|A0A087WWY3|A0A087WWY3_HUMANFilamin-AOS=HomosapiensGN=FLNAPE=1SV=1;tr|F8WE98|F8WE98_HUMANFilamin-A(Fragment)OS=HomosapiensGN=FLNAPE=1SV=2;sp|Q14315|FLNC_HUMANFilamin-COS=HomosapiensGN=FLNCPE=1SV=3;tr|H0Y5C6|H0Y5C6_HU…	598390000	698700000	280980000	1529500000	28861000	447680000	122310000	187450000	557480000	128110000	0.187544	0.600989
tr|J3QLD9|J3QLD9_HUMANFlotillin-2OS=HomosapiensGN=FLOT2PE=1SV=1;sp|Q14254|FLOT2_HUMANFlotillin-2OS=HomosapiensGN=FLOT2PE=1SV=2;tr|E7EMK3|E7EMK3_HUMANFlotillin-2OS=HomosapiensGN=FLOT2PE=1SV=1;tr|K7EKW9|K7EKW9_HUMANFlotillin-2(Fragment)OS=HomosapiensGN=FLOT2PE=1SV=1	1	1	1	375910	1	1859100	1	53268000	5490100	3373400	-0.319132	#NUM!
sp|Q15149|PLEC_HUMANPlectinOS=HomosapiensGN=PLECPE=1SV=3;tr|H0YDN1|H0YDN1_HUMANPlectin(Fragment)OS=HomosapiensGN=PLECPE=1SV=8;tr|E9PMV1|E9PMV1_HUMANPlectin(Fragment)OS=HomosapiensGN=PLECPE=1SV=1	5856000	9606500	1	34876000	82997000	269250000	55612000	20613000	94497000	6037800	-0.0348782	#NUM!
sp|P07858|CATB_HUMANCathepsinBOS=HomosapiensGN=CTSBPE=1SV=3	1	1	1	1	4407100	1	1	34231000	12306000	1	-0.251067	#NUM!
sp|P00403|COX2_HUMANCytochromecoxidasesubunit2OS=HomosapiensGN=MT-CO2PE=1SV=1	1	3214800	1	4493400	1	4289600	3289200	1	3246400	4896600	-0.374873	#NUM!
sp|O75369|FLNB_HUMANFilamin-BOS=HomosapiensGN=FLNBPE=1SV=2;tr|E7EN95|E7EN95_HUMANFilamin-BOS=HomosapiensGN=FLNBPE=1SV=1;tr|H7C5L4|H7C5L4_HUMANFilamin-B(Fragment)OS=HomosapiensGN=FLNBPE=1SV=1	1	1	1	1	8636600	16039000	1	2208200	69094000	3384400	-0.138277	#NUM!
sp|P60468|SC61B_HUMANProteintransportproteinSec61subunitbetaOS=HomosapiensGN=SEC61BPE=1SV=2;tr|S4R3B5|S4R3B5_HUMANProteintransportproteinSec61subunitbetaOS=HomosapiensGN=SEC61BPE=1SV=1	5473700	2934100	1	11020000	1	1	1	5233500	1	1	0.313316	0.372712
tr|D6RAC2|D6RAC2_HUMANReceptorof-activatedproteinCkinase1OS=HomosapiensGN=RACK1PE=1SV=1;sp|P63244|RACK1_HUMANReceptorofactivatedproteinCkinase1OS=HomosapiensGN=RACK1PE=1SV=3;tr|D6REE5|D6REE5_HUMANReceptorof-activatedproteinCkinase1(Fragment)OS=HomosapiensGN=RACK1PE=1SV=1;tr|J3KPE3|J3KPE3_HUMANReceptorof-activatedproteinCkinase1OS=HomosapiensGN=RACK1PE=1SV=1;tr|H0YAM7|H0YAM7_HUMANReceptorof-activa…	14219000	23077000	8526300	47204000	36408000	56146000	9091900	425700000	88313000	26526000	-0.28259	#NUM!
sp|P36871|PGM1_HUMANPhosphoglucomutase-1OS=HomosapiensGN=PGM1PE=1SV=3	22367000	19612000	1	23199000	20347000	4192400	96587000	45003000	41733000	5002500	-0.147863	#NUM!
sp|A0A075B6K5|LV39_HUMANImmunoglobulinlambdavariable3-9OS=HomosapiensGN=IGLV3-9PE=3SV=1;sp|P80748|LV321_HUMANImmunoglobulinlambdavariable3-21OS=HomosapiensGN=IGLV3-21PE=1SV=2;sp|A0A075B6K2|LV312_HUMANImmunoglobulinlambdavariable3-12OS=HomosapiensGN=IGLV3-12PE=3SV=2	1	1	38714000	12346000	1	8552500	46286000	7372100	62506000	10252000	-0.454789	#NUM!
sp|O00391|QSOX1_HUMANSulfhydryloxidase1OS=HomosapiensGN=QSOX1PE=1SV=3;tr|A8MXT8|A8MXT8_HUMANSulfhydryloxidase1OS=HomosapiensGN=QSOX1PE=1SV=2	7987200	75403000	4499200	19471000	1	29174000	1158700	5950300	331050000	128570000	-0.291047	#NUM!
sp|Q13045|FLII_HUMANProteinflightless-1homologOS=HomosapiensGN=FLIIPE=1SV=2;tr|J3KS39|J3KS39_HUMANProteinflightless-1homologOS=HomosapiensGN=FLIIPE=1SV=1;tr|J3KS54|J3KS54_HUMANProteinflightless-1homologOS=HomosapiensGN=FLIIPE=1SV=1	12687000	10356000	1	17344000	1	5191500	40180000	47058000	7202600	2572400	-0.27792	#NUM!
sp|P51884|LUM_HUMANLumicanOS=HomosapiensGN=LUMPE=1SV=2	4010300	1	14721000	2437200	1	1	1	3930000	1	1	-0.128719	#NUM!
tr|F5GY37|F5GY37_HUMANProhibitin-2OS=HomosapiensGN=PHB2PE=1SV=1;tr|J3KPX7|J3KPX7_HUMANProhibitin-2OS=HomosapiensGN=PHB2PE=1SV=2;sp|Q99623|PHB2_HUMANProhibitin-2OS=HomosapiensGN=PHB2PE=1SV=2;tr|F5H3X6|F5H3X6_HUMANProhibitin-2(Fragment)OS=HomosapiensGN=PHB2PE=1SV=2;tr|F5GWA7|F5GWA7_HUMANProhibitin-2(Fragment)OS=HomosapiensGN=PHB2PE=1SV=1	1	1	2864100	2354600	1	9176600	1	64212000	5839600	1	-0.323982	#NUM!
sp|O14773|TPP1_HUMANTripeptidyl-peptidase1OS=HomosapiensGN=TPP1PE=1SV=2	4842100	1883100	1	4994400	1	23353000	1	947740	2161300	13311000	-0.143633	#NUM!
tr|A0A0C4DH35|A0A0C4DH35_HUMANImmunoglobulinheavyvariable3-35(non-functional)(Fragment)OS=HomosapiensGN=IGHV3-35PE=1SV=1	1	1	1111300	1	1	1330500	1	1	16323000	2174200	-0.22687	#NUM!
sp|Q00653|NFKB2_HUMANNuclearfactorNF-kappa-Bp100subunitOS=HomosapiensGN=NFKB2PE=1SV=4	1	1	1	9409600	36324000	1	1	3598700	1	1	0.68174	0.0249179
sp|Q13813|SPTN1_HUMANSpectrinalphachain,non-erythrocytic1OS=HomosapiensGN=SPTAN1PE=1SV=3;tr|A0A0D9SGF6|A0A0D9SGF6_HUMANSpectrinalphachain,non-erythrocytic1OS=HomosapiensGN=SPTAN1PE=1SV=1;tr|A0A0D9SF54|A0A0D9SF54_HUMANSpectrinalphachain,non-erythrocytic1OS=HomosapiensGN=SPTAN1PE=1SV=1;tr|A0A0D9SFH4|A0A0D9SFH4_HUMANSpectrinalphachain,non-erythrocytic1(Fragment)OS=HomosapiensGN=SPTAN1PE=1SV=1	8726800	7155500	1	1	1	11715000	1	15314000	11200000	1	-0.212838	#NUM!
tr|A0A0A0MSW4|A0A0A0MSW4_HUMANPhosphatidylinositoltransferproteinbetaisoformOS=HomosapiensGN=PITPNBPE=1SV=1;sp|P48739|PIPNB_HUMANPhosphatidylinositoltransferproteinbetaisoformOS=HomosapiensGN=PITPNBPE=1SV=2;tr|B3KYB7|B3KYB7_HUMANPhosphatidylinositoltransferproteinbetaisoform(Fragment)OS=HomosapiensGN=PITPNBPE=1SV=8	6681400	1	1	1	1	6895600	1	3373600	6415300	1333700	0.0541753	0.881091
sp|P05141|ADT2_HUMANADP/ATPtranslocase2OS=HomosapiensGN=SLC25A5PE=1SV=7;sp|P12235|ADT1_HUMANADP/ATPtranslocase1OS=HomosapiensGN=SLC25A4PE=1SV=4;tr|V9GYG0|V9GYG0_HUMANADP/ATPtranslocase1OS=HomosapiensGN=SLC25A4PE=1SV=1;sp|Q9H0C2|ADT4_HUMANADP/ATPtranslocase4OS=HomosapiensGN=SLC25A31PE=2SV=1	1575800	30893000	2335000	89606000	1187600	5337900	1	866510	9866800	7636000	0.138499	0.700746
sp|P12814|ACTN1_HUMANAlpha-actinin-1OS=HomosapiensGN=ACTN1PE=1SV=2;tr|H9KV75|H9KV75_HUMANAlpha-actinin-1OS=HomosapiensGN=ACTN1PE=1SV=1;tr|H0YJW3|H0YJW3_HUMANAlpha-actinin-1(Fragment)OS=HomosapiensGN=ACTN1PE=1SV=1;tr|G3V2N5|G3V2N5_HUMANAlpha-actinin-1(Fragment)OS=HomosapiensGN=ACTN1PE=1SV=8;tr|H7C5W8|H7C5W8_HUMANAlpha-actinin-1(Fragment)OS=HomosapiensGN=ACTN1PE=1SV=1;tr|G3V5M4|G3V5M4_HUMANAlpha-ac…	113680000	98442000	23011000	169670000	25882000	48779000	89268000	43970000	56077000	12290000	0.309883	0.378305
sp|Q9NZN4|EHD2_HUMANEHdomain-containingprotein2OS=HomosapiensGN=EHD2PE=1SV=2	1	1	1	166080	1	5718300	1	1006100	1	1	-0.185985	#NUM!
tr|F8W7T7|F8W7T7_HUMANZincfingerprotein44OS=HomosapiensGN=ZNF44PE=4SV=1;sp|P15621|ZNF44_HUMANZincfingerprotein44OS=HomosapiensGN=ZNF44PE=2SV=3	612560	1	7215200	790060	1	1	443100	1	1	1	-0.189312	#NUM!
sp|P67870|CSK2B_HUMANCaseinkinaseIIsubunitbetaOS=HomosapiensGN=CSNK2BPE=1SV=1;tr|Q5SRQ3|Q5SRQ3_HUMANCaseinkinaseIIsubunitbetaOS=HomosapiensGN=CSNK2BPE=1SV=1;tr|Q5SRQ6|Q5SRQ6_HUMANCaseinkinaseIIsubunitbetaOS=HomosapiensGN=CSNK2BPE=1SV=2;tr|N0E472|N0E472_HUMANCaseinkinaseIIsubunitbetaOS=HomosapiensGN=CSNK2B-LY6G5B--991PE=1SV=1;tr|A0A0G2JM12|A0A0G2JM12_HUMANCaseinkinaseIIsubunitbetaOS=HomosapiensGN=…	1	1	1	1	1887500	1	1	17798000	4551400	1	-0.253413	#NUM!
sp|P36507|MP2K2_HUMANDualspecificitymitogen-activatedproteinkinasekinase2OS=HomosapiensGN=MAP2K2PE=1SV=1	3235700	4845600	1	5560100	1	1	1	4753300	1	1	0.122803	0.733607
sp|P02743|SAMP_HUMANSerumamyloidP-componentOS=HomosapiensGN=APCSPE=1SV=2	1	1	1	1353300	6816500	1	7569000	103900000	13388000	1	-0.275383	#NUM!
tr|G3XAM2|G3XAM2_HUMANComplementfactorIOS=HomosapiensGN=CFIPE=1SV=1;sp|P05156|CFAI_HUMANComplementfactorIOS=HomosapiensGN=CFIPE=1SV=2;tr|E7ETH0|E7ETH0_HUMANComplementfactorIOS=HomosapiensGN=CFIPE=1SV=1;tr|A0A087X0I2|A0A087X0I2_HUMANComplementfactorIOS=HomosapiensGN=CFIPE=1SV=1;tr|D6R9Z8|D6R9Z8_HUMANComplementfactorIOS=HomosapiensGN=CFIPE=1SV=1;CON__Q32PI4	11300000	4729100	265860000	22093000	1	1	1	1	3300600	1	-0.211415	#NUM!
sp|A0A0B4J1V0|HV315_HUMANImmunoglobulinheavyvariable3-15OS=HomosapiensGN=IGHV3-15PE=3SV=1	31428000	38771000	477960000	48806000	25749000	1	1	1	20608000	78290000	-0.219804	#NUM!
sp|P78417|GSTO1_HUMANGlutathioneS-transferaseomega-1OS=HomosapiensGN=GSTO1PE=1SV=2;tr|Q5TA02|Q5TA02_HUMANGlutathioneS-transferaseomega-1(Fragment)OS=HomosapiensGN=GSTO1PE=1SV=1;tr|Q5TA01|Q5TA01_HUMANGlutathioneS-transferaseomega-1(Fragment)OS=HomosapiensGN=GSTO1PE=1SV=1	8133900	9343500	2547800	22977000	1	57726000	1	3477800	183010000	4115700	-0.179594	#NUM!
sp|P05155|IC1_HUMANPlasmaproteaseC1inhibitorOS=HomosapiensGN=SERPING1PE=1SV=2;tr|E9PGN7|E9PGN7_HUMANPlasmaproteaseC1inhibitorOS=HomosapiensGN=SERPING1PE=1SV=1;tr|H9KV48|H9KV48_HUMANPlasmaproteaseC1inhibitorOS=HomosapiensGN=SERPING1PE=1SV=1	21053000	80726000	67859000	74279000	1	52082000	57474000	1	179510000	626870000	-0.331554	#NUM!
sp|A0MZ66|SHOT1_HUMANShootin-1OS=HomosapiensGN=SHTN1PE=1SV=4	1	1	1914100	1	1	8848900	1	1	3305400	1	-0.252016	#NUM!
tr|Q6P163|Q6P163_HUMANAPOC2proteinOS=HomosapiensGN=APOC2PE=1SV=1;tr|A0A024R0T9|A0A024R0T9_HUMANApolipoproteinC-IIisoform1OS=HomosapiensGN=APOC2PE=1SV=1;sp|P02655|APOC2_HUMANApolipoproteinC-IIOS=HomosapiensGN=APOC2PE=1SV=1;tr|K7ER74|K7ER74_HUMANAPOC4-APOC2readthrough(NMDcandidate)OS=HomosapiensGN=APOC4-APOC2PE=1SV=1;tr|V9GYJ8|V9GYJ8_HUMANApolipoproteinC-IIOS=HomosapiensGN=APOC2PE=4SV=1	1	1	12174000	1	1	9384000	1	123570000	11265000	4011300	-0.344958	#NUM!
sp|P30838|AL3A1_HUMANAldehydedehydrogenase,dimericNADP-preferringOS=HomosapiensGN=ALDH3A1PE=1SV=3;tr|C9JMC5|C9JMC5_HUMANAldehydedehydrogenase,dimericNADP-preferring(Fragment)OS=HomosapiensGN=ALDH3A1PE=1SV=1;tr|I3L3I9|I3L3I9_HUMANAldehydedehydrogenase,dimericNADP-preferringOS=HomosapiensGN=ALDH3A1PE=1SV=1;tr|E9PNN6|E9PNN6_HUMANAldehydedehydrogenase,dimericNADP-preferringOS=HomosapiensGN=ALDH3A1PE=…	12913000	9912200	1	10924000	4404700	11508000	8186000	5443600	373070000	49352000	-0.182155	#NUM!
sp|P09467|F16P1_HUMANFructose-1,6-bisphosphatase1OS=HomosapiensGN=FBP1PE=1SV=5;tr|Q5VZC3|Q5VZC3_HUMANFructose-1,6-bisphosphatase1(Fragment)OS=HomosapiensGN=FBP1PE=1SV=1	41475000	165930000	12762000	135460000	1	59428000	17448000	12132000	39996000	28413000	-0.0354181	#NUM!
tr|E9PAQ1|E9PAQ1_HUMANProperdinOS=HomosapiensGN=CFPPE=1SV=1;sp|P27918|PROP_HUMANProperdinOS=HomosapiensGN=CFPPE=1SV=2;tr|C9J7V5|C9J7V5_HUMANProperdin(Fragment)OS=HomosapiensGN=CFPPE=1SV=1	3417000	1	68804000	1	10225000	1	1	6472000	1	1	-0.151872	#NUM!
sp|P04196|HRG_HUMANHistidine-richglycoproteinOS=HomosapiensGN=HRGPE=1SV=1	22237000	6588100	635990000	41472000	3567900	1	1167100	2145100	1	1	-0.213758	#NUM!
sp|P30481|1B44_HUMANHLAclassIhistocompatibilityantigen,B-44alphachainOS=HomosapiensGN=HLA-BPE=1SV=1;sp|P30485|1B47_HUMANHLAclassIhistocompatibilityantigen,B-47alphachainOS=HomosapiensGN=HLA-BPE=1SV=1;sp|P30461|1B13_HUMANHLAclassIhistocompatibilityantigen,B-13alphachainOS=HomosapiensGN=HLA-BPE=1SV=1;tr|A0A140TA14|A0A140TA14_HUMANHLAclassIhistocompatibilityantigen,B-46alphachainOS=HomosapiensGN=HLA…	46548000	49380000	2159600	169530000	11886000	17478000	1	67379000	8153400	2562100	0.25137	0.479473
sp|Q5T4S7|UBR4_HUMANE3ubiquitin-proteinligaseUBR4OS=HomosapiensGN=UBR4PE=1SV=1;tr|A0A0A0MSW0|A0A0A0MSW0_HUMANE3ubiquitin-proteinligaseUBR4(Fragment)OS=HomosapiensGN=UBR4PE=1SV=1	9499800	1	15203000	19025000	1	1	1	13172000	4200800	1	0.0747334	0.836388
sp|P17213|BPI_HUMANBactericidalpermeability-increasingproteinOS=HomosapiensGN=BPIPE=1SV=4;tr|H0Y738|H0Y738_HUMANBactericidalpermeability-increasingproteinOS=HomosapiensGN=BPIPE=1SV=2;tr|A0A0D9SFX6|A0A0D9SFX6_HUMANBactericidalpermeability-increasingproteinOS=HomosapiensGN=BPIPE=1SV=1	101960000	99855000	1	64273000	80864000	5480300	8093000	133150000	16721000	8033700	0.401079	0.243853
sp|Q9UGT4|SUSD2_HUMANSushidomain-containingprotein2OS=HomosapiensGN=SUSD2PE=1SV=1	3928100	13049000	1	21289000	1	224510000	1	27150000	22734000	4237400	-0.181509	#NUM!
tr|A0A075B7D0|A0A075B7D0_HUMANImmunoglobulinheavyvariable1/OR15-1(non-functional)(Fragment)OS=HomosapiensGN=IGHV1OR15-1PE=1SV=1	1	1	6992900	6005100	19261000	1	1	1	9681600	1	0.517233	0.118176
tr|Q7Z3Z5|Q7Z3Z5_HUMANMediatorofRNApolymeraseIItranscriptionsubunit12OS=HomosapiensGN=TNRC11PE=1SV=1;sp|Q93074|MED12_HUMANMediatorofRNApolymeraseIItranscriptionsubunit12OS=HomosapiensGN=MED12PE=1SV=4	24159000	1385600	1	1884700	1	1	1	1094800	1	1	0.573918	0.07559
sp|Q9H7D0|DOCK5_HUMANDedicatorofcytokinesisprotein5OS=HomosapiensGN=DOCK5PE=1SV=3;tr|H0Y7N4|H0Y7N4_HUMANDedicatorofcytokinesisprotein5(Fragment)OS=HomosapiensGN=DOCK5PE=1SV=1	3863900	1	33360000	1	1	1	937940	1	1	1	-0.188597	#NUM!
sp|P80511|S10AC_HUMANProteinS100-A12OS=HomosapiensGN=S100A12PE=1SV=2	94423000	29744000	248830000	28495000	4043200000	1	6919900	31412000	17870000	1	0.647903	0.036948
sp|P12429|ANXA3_HUMANAnnexinA3OS=HomosapiensGN=ANXA3PE=1SV=3;tr|D6RA82|D6RA82_HUMANAnnexinOS=HomosapiensGN=ANXA3PE=1SV=1;tr|D6RFG5|D6RFG5_HUMANAnnexin(Fragment)OS=HomosapiensGN=ANXA3PE=1SV=1;tr|D6RCA8|D6RCA8_HUMANAnnexin(Fragment)OS=HomosapiensGN=ANXA3PE=1SV=1;tr|D6RAZ8|D6RAZ8_HUMANAnnexin(Fragment)OS=HomosapiensGN=ANXA3PE=1SV=1;tr|D6RFJ9|D6RFJ9_HUMANAnnexinA3(Fragment)OS=HomosapiensGN=ANXA3PE=1S…	19975000	122370000	1157800	65514000	69096000	104610000	22603000	1818800000	222110000	35984000	-0.297361	#NUM!
tr|A0A087X232|A0A087X232_HUMANComplementC1ssubcomponentOS=HomosapiensGN=C1SPE=1SV=1;sp|P09871|C1S_HUMANComplementC1ssubcomponentOS=HomosapiensGN=C1SPE=1SV=1;tr|F8WCZ6|F8WCZ6_HUMANComplementC1ssubcomponentOS=HomosapiensGN=C1SPE=1SV=1;tr|H0Y5D1|H0Y5D1_HUMANComplementC1ssubcomponent(Fragment)OS=HomosapiensGN=C1SPE=1SV=1;tr|F5H7T4|F5H7T4_HUMANComplementC1ssubcomponent(Fragment)OS=HomosapiensGN=C1SPE=…	3779900	2772400	1029600000	2690800	87087000	1	1	3470600	4017100	1	-0.193264	#NUM!
sp|P09210|GSTA2_HUMANGlutathioneS-transferaseA2OS=HomosapiensGN=GSTA2PE=1SV=4;sp|P08263|GSTA1_HUMANGlutathioneS-transferaseA1OS=HomosapiensGN=GSTA1PE=1SV=3;tr|Q5JW85|Q5JW85_HUMANGlutathioneS-transferaseA3OS=HomosapiensGN=GSTA3PE=1SV=1;sp|Q16772|GSTA3_HUMANGlutathioneS-transferaseA3OS=HomosapiensGN=GSTA3PE=1SV=3;sp|Q7RTV2|GSTA5_HUMANGlutathioneS-transferaseA5OS=HomosapiensGN=GSTA5PE=1SV=1;tr|Q5JW8…	9087200	309300000	4681900	202820000	22194000	257410000	46001000	4918500	656740000	311270000	-0.324447	#NUM!
tr|M0R0P7|M0R0P7_HUMAN60SribosomalproteinL18aOS=HomosapiensGN=RPL18APE=1SV=1;tr|M0R3D6|M0R3D6_HUMAN60SribosomalproteinL18a(Fragment)OS=HomosapiensGN=RPL18APE=1SV=1;tr|M0R1A7|M0R1A7_HUMAN60SribosomalproteinL18aOS=HomosapiensGN=RPL18APE=1SV=1;tr|M0R117|M0R117_HUMAN60SribosomalproteinL18aOS=HomosapiensGN=RPL18APE=1SV=1;sp|Q02543|RL18A_HUMAN60SribosomalproteinL18aOS=HomosapiensGN=RPL18APE=1SV=2	1	1	3735500	1	1	8596600	1	1	6113500	1	-0.312226	#NUM!
sp|P02763|A1AG1_HUMANAlpha-1-acidglycoprotein1OS=HomosapiensGN=ORM1PE=1SV=1	10483000	2889800	373040000	7974400	10053000	1	1621600	1	1	1	-0.212836	#NUM!
sp|P15924|DESP_HUMANDesmoplakinOS=HomosapiensGN=DSPPE=1SV=3	1	2873700	1	527100	1	157090000	148060	882990	12595000	1692700	-0.163859	#NUM!
sp|P63000|RAC1_HUMANRas-relatedC3botulinumtoxinsubstrate1OS=HomosapiensGN=RAC1PE=1SV=1;sp|P60763|RAC3_HUMANRas-relatedC3botulinumtoxinsubstrate3OS=HomosapiensGN=RAC3PE=1SV=1	43888000	189170000	9320500	67867000	22306000	164430000	15016000	399370000	95135000	68223000	-0.398891	#NUM!
sp|P13671|CO6_HUMANComplementcomponentC6OS=HomosapiensGN=C6PE=1SV=3	4411900	2155500	95856000	1062300	5763700	1	2192300	1	5170200	1	-0.201263	#NUM!
sp|P04075|ALDOA_HUMANFructose-bisphosphatealdolaseAOS=HomosapiensGN=ALDOAPE=1SV=2;tr|J3KPS3|J3KPS3_HUMANFructose-bisphosphatealdolaseOS=HomosapiensGN=ALDOAPE=1SV=1;tr|H3BQN4|H3BQN4_HUMANFructose-bisphosphatealdolaseOS=HomosapiensGN=ALDOAPE=1SV=1;tr|H3BPS8|H3BPS8_HUMANFructose-bisphosphatealdolaseA(Fragment)OS=HomosapiensGN=ALDOAPE=1SV=1;tr|H3BUH7|H3BUH7_HUMANFructose-bisphosphatealdolaseA(Fragmen…	139960000	117180000	38391000	141970000	1	157440000	59974000	147270000	305930000	58999000	-0.21071	#NUM!
tr|G3V203|G3V203_HUMAN60SribosomalproteinL18OS=HomosapiensGN=RPL18PE=1SV=1;tr|H0YHA7|H0YHA7_HUMAN60SribosomalproteinL18(Fragment)OS=HomosapiensGN=RPL18PE=1SV=1;sp|Q07020|RL18_HUMAN60SribosomalproteinL18OS=HomosapiensGN=RPL18PE=1SV=2;tr|J3QQ67|J3QQ67_HUMAN60SribosomalproteinL18(Fragment)OS=HomosapiensGN=RPL18PE=1SV=1;tr|F8VUA6|F8VUA6_HUMAN60SribosomalproteinL18(Fragment)OS=HomosapiensGN=RPL18PE=1S…	1	8194800	1	1	1	5454200	1	15355000	5046300	1	-0.448761	#NUM!
sp|P23528|COF1_HUMANCofilin-1OS=HomosapiensGN=CFL1PE=1SV=3;tr|G3V1A4|G3V1A4_HUMANCofilin1(Non-muscle),isoformCRA_aOS=HomosapiensGN=CFL1PE=1SV=1;tr|E9PP50|E9PP50_HUMANCofilin-1(Fragment)OS=HomosapiensGN=CFL1PE=1SV=8;tr|E9PK25|E9PK25_HUMANCofilin-1OS=HomosapiensGN=CFL1PE=1SV=1;tr|E9PLJ3|E9PLJ3_HUMANCofilin-1(Fragment)OS=HomosapiensGN=CFL1PE=1SV=1;tr|E9PS23|E9PS23_HUMANCofilin-1(Fragment)OS=Homosapi…	135220000	112850000	23171000	120600000	1	25504000	178620000	78386000	158380000	174140000	-0.237413	#NUM!
sp|P52907|CAZA1_HUMANF-actin-cappingproteinsubunitalpha-1OS=HomosapiensGN=CAPZA1PE=1SV=3	1	50248000	1	1	1	21232000	51986000	11842000	12436000	20233000	-0.522171	#NUM!
sp|P06702|S10A9_HUMANProteinS100-A9OS=HomosapiensGN=S100A9PE=1SV=1	217790000	335790000	51341000	164960000	5348400000	1	11201000	476090000	25490000	1	0.650686	0.035835
sp|P04745|AMY1_HUMANAlpha-amylase1OS=HomosapiensGN=AMY1APE=1SV=2;sp|P19961|AMY2B_HUMANAlpha-amylase2BOS=HomosapiensGN=AMY2BPE=1SV=1;sp|P04746|AMYP_HUMANPancreaticalpha-amylaseOS=HomosapiensGN=AMY2APE=1SV=2;tr|H7BZQ8|H7BZQ8_HUMANPancreaticalpha-amylase(Fragment)OS=HomosapiensGN=AMY2APE=1SV=1;tr|Q5T085|Q5T085_HUMANAlpha-amylase1(Fragment)OS=HomosapiensGN=AMY1BPE=1SV=1;tr|C9J2Z5|C9J2Z5_HUMANAlpha-am…	1	1	1	1	490260	1148800	1	6802700	729890	129250000	-0.247861	#NUM!
tr|H7C1M3|H7C1M3_HUMANMatrixmetalloproteinase(Fragment)OS=HomosapiensGN=MMP8PE=1SV=1;sp|P22894|MMP8_HUMANNeutrophilcollagenaseOS=HomosapiensGN=MMP8PE=1SV=1	2574300	1	1	1	21585000	1	1398400	1	1	1	0.708885	0.0174672
tr|A0A1B0GTP7|A0A1B0GTP7_HUMANAcidceramidaseOS=HomosapiensGN=ASAH1PE=1SV=1;tr|E7EMM4|E7EMM4_HUMANAcidceramidaseOS=HomosapiensGN=ASAH1PE=1SV=1;tr|A0A1B0GW68|A0A1B0GW68_HUMANAcidceramidaseOS=HomosapiensGN=ASAH1PE=1SV=1;tr|A0A1B0GUA4|A0A1B0GUA4_HUMANAcidceramidaseOS=HomosapiensGN=ASAH1PE=1SV=1;tr|A0A1B0GTM3|A0A1B0GTM3_HUMANAcidceramidaseOS=HomosapiensGN=ASAH1PE=1SV=1;tr|A0A1B0GTZ5|A0A1B0GTZ5_HUMANAc…	13355000	32575000	1	38769000	1	13238000	92965000	11072000	39339000	20113000	-0.280803	#NUM!
sp|Q5T1M5|FKB15_HUMANFK506-bindingprotein15OS=HomosapiensGN=FKBP15PE=1SV=2;tr|A0A0A0MT60|A0A0A0MT60_HUMANPeptidylprolylisomerase(Fragment)OS=HomosapiensGN=FKBP15PE=1SV=1	1	3497400	1	12631000	1	1	1	1	2761800	1	0.149094	0.678801
sp|P41218|MNDA_HUMANMyeloidcellnucleardifferentiationantigenOS=HomosapiensGN=MNDAPE=1SV=1;tr|H0Y6P3|H0Y6P3_HUMANMyeloidcellnucleardifferentiationantigen(Fragment)OS=HomosapiensGN=MNDAPE=1SV=1	104660000	171440000	4707400	26748000	1	7512700	12082000	84618000	8632300	1	0.0281351	0.938118
sp|P07737|PROF1_HUMANProfilin-1OS=HomosapiensGN=PFN1PE=1SV=2;tr|K7EJ44|K7EJ44_HUMANProfilinOS=HomosapiensGN=PFN1PE=1SV=1;CON__P02584;tr|I3L3D5|I3L3D5_HUMANProfilin(Fragment)OS=HomosapiensGN=PFN1PE=1SV=1	498390000	293970000	58476000	208620000	6718200	61351000	258500000	76724000	111020000	51959000	0.323841	0.35581
tr|H0YD13|H0YD13_HUMANCD44antigenOS=HomosapiensGN=CD44PE=1SV=2;tr|H0Y2P0|H0Y2P0_HUMANCD44antigen(Fragment)OS=HomosapiensGN=CD44PE=1SV=1;sp|P16070|CD44_HUMANCD44antigenOS=HomosapiensGN=CD44PE=1SV=3;tr|H0YE40|H0YE40_HUMANCD44antigen(Fragment)OS=HomosapiensGN=CD44PE=1SV=1;tr|H0YDX6|H0YDX6_HUMANCD44antigen(Fragment)OS=HomosapiensGN=CD44PE=1SV=1;tr|H0YDW7|H0YDW7_HUMANCD44antigen(Fragment)OS=Homosapien…	27215000	22911000	3243000	20870000	3648200	114880000	78877000	6835300	4133700	1	-0.143503	#NUM!
tr|A0A1B0GV96|A0A1B0GV96_HUMANUncharacterizedproteinOS=HomosapiensGN=LOC105371267PE=4SV=1	224530000	58986000	1	26480000	15416000	1	1	1	90166000	1	0.52688	0.110083
sp|P30153|2AAA_HUMANSerine/threonine-proteinphosphatase2A65kDaregulatorysubunitAalphaisoformOS=HomosapiensGN=PPP2R1APE=1SV=4;tr|B3KQV6|B3KQV6_HUMANSerine/threonine-proteinphosphatase2A65kDaregulatorysubunitAalphaisoformOS=HomosapiensGN=PPP2R1APE=1SV=1;tr|C9J9C1|C9J9C1_HUMANSerine/threonine-proteinphosphatase2A65kDaregulatorysubunitAalphaisoform(Fragment)OS=HomosapiensGN=PPP2R1APE=1SV=2;tr|E9PH38|…	82000000	46129000	8154200	59591000	19704000	19060000	3615600	53027000	38624000	17946000	0.429656	0.208083
tr|F8W8T1|F8W8T1_HUMANInterferon-inducedGTP-bindingproteinMx1OS=HomosapiensGN=MX1PE=1SV=1;sp|P20591|MX1_HUMANInterferon-inducedGTP-bindingproteinMx1OS=HomosapiensGN=MX1PE=1SV=4;tr|H9KVD0|H9KVD0_HUMANInterferon-inducedGTP-bindingproteinMx1(Fragment)OS=HomosapiensGN=MX1PE=1SV=1;tr|H9KVC4|H9KVC4_HUMANInterferon-inducedGTP-bindingproteinMx1(Fragment)OS=HomosapiensGN=MX1PE=1SV=1;tr|H9KVC7|H9KVC7_HUMAN…	4062200	1	1	12381000	1	1	1	1	3377700	1	0.371913	0.283561
sp|Q5XUX1|FBXW9_HUMANF-box/WDrepeat-containingprotein9OS=HomosapiensGN=FBXW9PE=1SV=2	1	7627300	1	4591100	1	1	1	1	3306600	1	-0.0978015	#NUM!
sp|Q8IZ83|A16A1_HUMANAldehydedehydrogenasefamily16memberA1OS=HomosapiensGN=ALDH16A1PE=1SV=2;tr|F5H4B6|F5H4B6_HUMANAldehydedehydrogenasefamily16memberA1OS=HomosapiensGN=ALDH16A1PE=1SV=1;tr|M0QY06|M0QY06_HUMANAldehydedehydrogenasefamily16memberA1(Fragment)OS=HomosapiensGN=ALDH16A1PE=1SV=1	10596000	9028300	1	11508000	19536000	13824000	3964200	46660000	30088000	2821200	-0.0365198	#NUM!
sp|O60506|HNRPQ_HUMANHeterogeneousnuclearribonucleoproteinQOS=HomosapiensGN=SYNCRIPPE=1SV=2;tr|F6UXX1|F6UXX1_HUMANHeterogeneousnuclearribonucleoproteinQ(Fragment)OS=HomosapiensGN=SYNCRIPPE=1SV=1;tr|B7Z645|B7Z645_HUMANHeterogeneousnuclearribonucleoproteinQOS=HomosapiensGN=SYNCRIPPE=1SV=1;sp|O43390|HNRPR_HUMANHeterogeneousnuclearribonucleoproteinROS=HomosapiensGN=HNRNPRPE=1SV=1	3514300	1	1	1	1	4660400	1	1	8956700	1	-0.0125532	#NUM!
sp|P02545|LMNA_HUMANPrelamin-A/COS=HomosapiensGN=LMNAPE=1SV=1;tr|Q3BDU5|Q3BDU5_HUMANPrelamin-A/COS=HomosapiensGN=LMNAPE=1SV=1;tr|Q5TCI8|Q5TCI8_HUMANPrelamin-A/COS=HomosapiensGN=LMNAPE=1SV=1;tr|H0YAB0|H0YAB0_HUMANPrelamin-A/C(Fragment)OS=HomosapiensGN=LMNAPE=1SV=1;tr|A0A0C4DGC5|A0A0C4DGC5_HUMANPrelamin-A/C(Fragment)OS=HomosapiensGN=LMNAPE=1SV=1	40879000	64572000	2351300	511200000	11730000	4965600	6543600	3036500	91644000	11147000	0.239138	0.501927
sp|P04217|A1BG_HUMANAlpha-1B-glycoproteinOS=HomosapiensGN=A1BGPE=1SV=4;tr|M0R009|M0R009_HUMANAlpha-1B-glycoprotein(Fragment)OS=HomosapiensGN=A1BGPE=1SV=8	8278500	20490000	96891000	6843100	1	1	1	8119400	27139000	1	-0.29865	#NUM!
sp|P02747|C1QC_HUMANComplementC1qsubcomponentsubunitCOS=HomosapiensGN=C1QCPE=1SV=3	92006000	104300000	1101800000	106060000	1	87266000	71150000	53591000	19211000	97385000	-0.271139	#NUM!
sp|P00738|HPT_HUMANHaptoglobinOS=HomosapiensGN=HPPE=1SV=1;tr|J3QR68|J3QR68_HUMANHaptoglobin(Fragment)OS=HomosapiensGN=HPPE=1SV=1;tr|A0A0C4DGL8|A0A0C4DGL8_HUMANHaptoglobinOS=HomosapiensGN=HPPE=1SV=1;tr|J3QLC9|J3QLC9_HUMANHaptoglobin(Fragment)OS=HomosapiensGN=HPPE=1SV=1;tr|A0A087WU08|A0A087WU08_HUMANHaptoglobinOS=HomosapiensGN=HPPE=1SV=1;tr|H3BS21|H3BS21_HUMANHaptoglobin(Fragment)OS=HomosapiensGN=H…	719650000	29241000	15370000000	50578000	14314000	1508600	1	347670000	18549000	9796300	-0.227682	#NUM!
sp|Q16610|ECM1_HUMANExtracellularmatrixprotein1OS=HomosapiensGN=ECM1PE=1SV=2	1834700	1	31448000	1	1	1	1	1	963580	1	-0.220532	#NUM!
tr|E9PNW4|E9PNW4_HUMANCD59glycoproteinOS=HomosapiensGN=CD59PE=1SV=1;sp|P13987|CD59_HUMANCD59glycoproteinOS=HomosapiensGN=CD59PE=1SV=1;tr|E9PR17|E9PR17_HUMANCD59glycoproteinOS=HomosapiensGN=CD59PE=1SV=1;tr|H0YET2|H0YET2_HUMANCD59glycoprotein(Fragment)OS=HomosapiensGN=CD59PE=1SV=1	60203000	67194000	32031000	76053000	1	46871000	18539000	538150000	139220000	12473000	-0.305846	#NUM!
sp|A0A075B6I0|LV861_HUMANImmunoglobulinlambdavariable8-61OS=HomosapiensGN=IGLV8-61PE=3SV=7	1	1	33972000	1	1331100	1	1	1	452480	1	-0.225023	#NUM!
sp|Q13228|SBP1_HUMANSelenium-bindingprotein1OS=HomosapiensGN=SELENBP1PE=1SV=2;tr|A6PVX1|A6PVX1_HUMANSelenium-bindingprotein1(Fragment)OS=HomosapiensGN=SELENBP1PE=1SV=1;tr|F2Z2W8|F2Z2W8_HUMANSelenium-bindingprotein1OS=HomosapiensGN=SELENBP1PE=1SV=1;tr|F8WCR4|F8WCR4_HUMANSelenium-bindingprotein1OS=HomosapiensGN=SELENBP1PE=1SV=1;tr|H0Y532|H0Y532_HUMANSelenium-bindingprotein1(Fragment)OS=HomosapiensG…	26840000	23126000	1	29686000	1	17102000	14245000	4350500	127270000	37619000	-0.153085	#NUM!
sp|P02042|HBD_HUMANHemoglobinsubunitdeltaOS=HomosapiensGN=HBDPE=1SV=2;tr|E9PFT6|E9PFT6_HUMANHemoglobinsubunitdeltaOS=HomosapiensGN=HBDPE=1SV=1;tr|E9PEW8|E9PEW8_HUMANHemoglobinsubunitdelta(Fragment)OS=HomosapiensGN=HBDPE=1SV=1;tr|C9JRG0|C9JRG0_HUMANHemoglobinsubunitdelta(Fragment)OS=HomosapiensGN=HBDPE=1SV=1	1	1	21056000	12410000	1	22203000	15702000	1	41038000	1	-0.348045	#NUM!
sp|P62081|RS7_HUMAN40SribosomalproteinS7OS=HomosapiensGN=RPS7PE=1SV=1;tr|B5MCP9|B5MCP9_HUMAN40SribosomalproteinS7OS=HomosapiensGN=RPS7PE=1SV=1	1	1	1	909050	1	291970	1	889580	16700000	1	-0.169558	#NUM!
sp|P49189|AL9A1_HUMAN4-trimethylaminobutyraldehydedehydrogenaseOS=HomosapiensGN=ALDH9A1PE=1SV=3	21863000	16536000	1	29951000	1	22241000	10529000	3305000	38516000	44828000	-0.129151	#NUM!
tr|H7C5I5|H7C5I5_HUMANPhospholipidscramblase(Fragment)OS=HomosapiensGN=PLSCR1PE=1SV=1;tr|C9J9P4|C9J9P4_HUMANPhospholipidscramblase(Fragment)OS=HomosapiensGN=PLSCR1PE=1SV=1;tr|C9J7K9|C9J7K9_HUMANPhospholipidscramblaseOS=HomosapiensGN=PLSCR1PE=1SV=1;sp|O15162|PLS1_HUMANPhospholipidscramblase1OS=HomosapiensGN=PLSCR1PE=1SV=1;tr|C9J0H3|C9J0H3_HUMANPhospholipidscramblase(Fragment)OS=HomosapiensGN=PLSCR…	5594000	5678800	3458800	4695100	1	1	4725600	201120000	15608000	1	-0.290084	#NUM!
tr|K7EK60|K7EK60_HUMANFormin-likeprotein1OS=HomosapiensGN=FMNL1PE=1SV=1;sp|O95466|FMNL1_HUMANFormin-likeprotein1OS=HomosapiensGN=FMNL1PE=1SV=3;tr|K7EJE6|K7EJE6_HUMANFormin-likeprotein1(Fragment)OS=HomosapiensGN=FMNL1PE=1SV=1;tr|A0A0A0MR62|A0A0A0MR62_HUMANFormin-likeprotein1OS=HomosapiensGN=FMNL1PE=1SV=1;tr|K7EMY8|K7EMY8_HUMANFormin-likeprotein1(Fragment)OS=HomosapiensGN=FMNL1PE=1SV=1;tr|K7ERL1|K7…	15922000	1	15819000	8811700	15704000	7518700	1	18669000	1	6328700	0.414626	0.226506
sp|Q12846|STX4_HUMANSyntaxin-4OS=HomosapiensGN=STX4PE=1SV=2	1	1	449340	1	1	722040	1	17792000	1	1	-0.292813	#NUM!
sp|Q7Z5L0|VMO1_HUMANVitellinemembraneouterlayerprotein1homologOS=HomosapiensGN=VMO1PE=1SV=1	1	7343300	1	5920500	1	1	1	568090	3579400	1	-0.0758658	#NUM!
sp|P04279|SEMG1_HUMANSemenogelin-1OS=HomosapiensGN=SEMG1PE=1SV=2	722850	1	1	686800	500390	1900100	1	1	15502000	1	-0.125148	#NUM!
sp|P61160|ARP2_HUMANActin-relatedprotein2OS=HomosapiensGN=ACTR2PE=1SV=1;tr|A0A1B0GWD0|A0A1B0GWD0_HUMANActin-relatedprotein2OS=HomosapiensGN=ACTR2PE=1SV=1;tr|A0A1B0GWH0|A0A1B0GWH0_HUMANActin-relatedprotein2OS=HomosapiensGN=ACTR2PE=1SV=1;tr|F5H6T1|F5H6T1_HUMANARP2actin-relatedprotein2homolog(Yeast),isoformCRA_dOS=HomosapiensGN=ACTR2PE=1SV=2	217410000	126640000	39276000	249000000	14773000	57930000	78320000	150800000	46404000	59307000	0.284466	0.420932
sp|P00450|CERU_HUMANCeruloplasminOS=HomosapiensGN=CPPE=1SV=1;tr|E9PFZ2|E9PFZ2_HUMANCeruloplasminOS=HomosapiensGN=CPPE=1SV=1;tr|H7C5R1|H7C5R1_HUMANCeruloplasmin(Fragment)OS=HomosapiensGN=CPPE=1SV=1;CON__ENSEMBL:ENSBTAP00000031900;tr|D6RE86|D6RE86_HUMANCeruloplasmin(Fragment)OS=HomosapiensGN=CPPE=1SV=8;tr|H7C5N5|H7C5N5_HUMANCeruloplasmin(Fragment)OS=HomosapiensGN=CPPE=1SV=1	274710000	285820000	1448400000	86344000	32282000	213060000	16149000	302810000	216570000	35342000	-0.279942	#NUM!
sp|P04792|HSPB1_HUMANHeatshockproteinbeta-1OS=HomosapiensGN=HSPB1PE=1SV=2;tr|F8WE04|F8WE04_HUMANHeatshockproteinbeta-1OS=HomosapiensGN=HSPB1PE=1SV=1;tr|C9J3N8|C9J3N8_HUMANHeatshockproteinbeta-1OS=HomosapiensGN=HSPB1PE=1SV=1	13257000	32470000	4825600	35496000	1	55076000	7941900	3687900	50809000	32946000	-0.274569	#NUM!
tr|A0A0D9SFB3|A0A0D9SFB3_HUMANATP-dependentRNAhelicaseDDX3XOS=HomosapiensGN=DDX3XPE=1SV=1;tr|A0A0D9SG12|A0A0D9SG12_HUMANATP-dependentRNAhelicaseDDX3XOS=HomosapiensGN=DDX3XPE=1SV=1;sp|O15523|DDX3Y_HUMANATP-dependentRNAhelicaseDDX3YOS=HomosapiensGN=DDX3YPE=1SV=2;sp|O00571|DDX3X_HUMANATP-dependentRNAhelicaseDDX3XOS=HomosapiensGN=DDX3XPE=1SV=3;tr|A0A0D9SF53|A0A0D9SF53_HUMANATP-dependentRNAhelicaseDDX…	3447800	1	2944400	2137900	1	7790400	1	670190	6983100	2044400	-0.131224	#NUM!
sp|P35579|MYH9_HUMANMyosin-9OS=HomosapiensGN=MYH9PE=1SV=4;sp|P35749|MYH11_HUMANMyosin-11OS=HomosapiensGN=MYH11PE=1SV=3;sp|P35580|MYH10_HUMANMyosin-10OS=HomosapiensGN=MYH10PE=1SV=3;tr|Q5BKV1|Q5BKV1_HUMANMYH9proteinOS=HomosapiensGN=MYH9PE=1SV=1;tr|B1AH99|B1AH99_HUMANMyosin-9(Fragment)OS=HomosapiensGN=MYH9PE=1SV=1;tr|E7ERA5|E7ERA5_HUMANMyosin-10(Fragment)OS=HomosapiensGN=MYH10PE=1SV=8;REV__tr|S4R3H4…	3934600000	1353100000	157930000	2641600000	202220000	1113400000	298390000	2031600000	618750000	206170000	0.442275	0.193291
tr|Q5JX54|Q5JX54_HUMANCopine-1(Fragment)OS=HomosapiensGN=CPNE1PE=1SV=1;tr|Q5JX57|Q5JX57_HUMANCopine-1(Fragment)OS=HomosapiensGN=CPNE1PE=1SV=8;tr|E7EV27|E7EV27_HUMANCopine-1OS=HomosapiensGN=CPNE1PE=1SV=1;tr|Q5JX55|Q5JX55_HUMANCopine-1(Fragment)OS=HomosapiensGN=CPNE1PE=1SV=1;tr|Q5JX56|Q5JX56_HUMANCopine-1(Fragment)OS=HomosapiensGN=CPNE1PE=1SV=1;tr|Q5JX58|Q5JX58_HUMANCopine-1(Fragment)OS=Homosapiens…	1	1	1	1	359070	191040	1	47002000	158390	1	-0.275599	#NUM!
sp|P40306|PSB10_HUMANProteasomesubunitbetatype-10OS=HomosapiensGN=PSMB10PE=1SV=1;tr|J3QQN1|J3QQN1_HUMANProteasomesubunitbetatype-10(Fragment)OS=HomosapiensGN=PSMB10PE=1SV=1	7984900	6115100	1	7268400	1	1	1	8847600	1	1	0.214374	0.548636
sp|P03952|KLKB1_HUMANPlasmakallikreinOS=HomosapiensGN=KLKB1PE=1SV=1;tr|H0YAC1|H0YAC1_HUMANPlasmakallikrein(Fragment)OS=HomosapiensGN=KLKB1PE=1SV=1;tr|E9PBC5|E9PBC5_HUMANPlasmakallikreinOS=HomosapiensGN=KLKB1PE=1SV=2;tr|C9JCT1|C9JCT1_HUMANPlasmakallikrein(Fragment)OS=HomosapiensGN=KLKB1PE=1SV=1;tr|C9J075|C9J075_HUMANPlasmakallikrein(Fragment)OS=HomosapiensGN=KLKB1PE=1SV=1	1508800	1774400	193750000	1967000	2024500	1	1	3976200	4965800	1	-0.247214	#NUM!
tr|F8VZY9|F8VZY9_HUMANKeratin,typeIcytoskeletal18OS=HomosapiensGN=KRT18PE=1SV=1;sp|P05783|K1C18_HUMANKeratin,typeIcytoskeletal18OS=HomosapiensGN=KRT18PE=1SV=2	15851000	1	1	1	1	1	1	36150000	19536000	1	-0.106461	#NUM!
tr|A0A0C4DFP6|A0A0C4DFP6_HUMANCartilageacidicprotein1OS=HomosapiensGN=CRTAC1PE=1SV=1;sp|Q9NQ79|CRAC1_HUMANCartilageacidicprotein1OS=HomosapiensGN=CRTAC1PE=1SV=2;tr|Q5T4F6|Q5T4F6_HUMANCartilageacidicprotein1(Fragment)OS=HomosapiensGN=CRTAC1PE=1SV=1	28575000	44478000	3413400	14140000	1	26601000	9313400	1356600	39365000	286220000	-0.250245	#NUM!
sp|P08514|ITA2B_HUMANIntegrinalpha-IIbOS=HomosapiensGN=ITGA2BPE=1SV=3	1	1	38569000	1	1	1	1	1	51137	1	-0.247267	#NUM!
sp|Q9ULV4|COR1C_HUMANCoronin-1COS=HomosapiensGN=CORO1CPE=1SV=1;tr|B4E3S0|B4E3S0_HUMANCoroninOS=HomosapiensGN=CORO1CPE=1SV=1;tr|H0YHL7|H0YHL7_HUMANCoronin-1C(Fragment)OS=HomosapiensGN=CORO1CPE=1SV=1;tr|F8W1H8|F8W1H8_HUMANCoronin(Fragment)OS=HomosapiensGN=CORO1CPE=1SV=1;tr|F8VUX3|F8VUX3_HUMANCoroninOS=HomosapiensGN=CORO1CPE=1SV=1;tr|F8VSA4|F8VSA4_HUMANCoronin(Fragment)OS=HomosapiensGN=CORO1CPE=1SV=…	31861000	39994000	5504300	84473000	1	287190000	24032000	35198000	46582000	32316000	-0.15648	#NUM!
tr|B4DPQ0|B4DPQ0_HUMANComplementC1rsubcomponentOS=HomosapiensGN=C1RPE=1SV=1;sp|P00736|C1R_HUMANComplementC1rsubcomponentOS=HomosapiensGN=C1RPE=1SV=2;tr|F5H2D0|F5H2D0_HUMANComplementC1rsubcomponentOS=HomosapiensGN=C1RPE=1SV=3;tr|F5H1V0|F5H1V0_HUMANComplementC1rsubcomponentOS=HomosapiensGN=C1RPE=1SV=1;tr|F5H6Y3|F5H6Y3_HUMANComplementC1rsubcomponent(Fragment)OS=HomosapiensGN=C1RPE=1SV=1;tr|F5H3N3|F5…	2687200	1610100	1474400000	3785300	1785300	2936300	1	3973100	5872600	6257100	-0.247996	#NUM!
sp|P20742|PZP_HUMANPregnancyzoneproteinOS=HomosapiensGN=PZPPE=1SV=4	1	1	111710000	1	1	1	1	1	551760	1	-0.247953	#NUM!
sp|A0A0J9YX35|HV64D_HUMANImmunoglobulinheavyvariable3-64DOS=HomosapiensGN=IGHV3-64DPE=3SV=1	1	1	6710400	1	1	1	1	1	34986	1	-0.248005	#NUM!
tr|E7EQB2|E7EQB2_HUMANLactotransferrin(Fragment)OS=HomosapiensGN=LTFPE=1SV=1;tr|E7ER44|E7ER44_HUMANLactotransferrinOS=HomosapiensGN=LTFPE=1SV=1;sp|P02788|TRFL_HUMANLactotransferrinOS=HomosapiensGN=LTFPE=1SV=6;tr|C9JCF5|C9JCF5_HUMANLactotransferrin(Fragment)OS=HomosapiensGN=LTFPE=1SV=1;CON__Q29443;CON__Q0IIK2	1567400000	835290000	10661000	236270000	2055400000	71187000	2252600000	18130000000	291270000	1242500000	-0.215641	#NUM!
tr|F5GX30|F5GX30_HUMANCation-dependentmannose-6-phosphatereceptorOS=HomosapiensGN=M6PRPE=1SV=2;sp|P20645|MPRD_HUMANCation-dependentmannose-6-phosphatereceptorOS=HomosapiensGN=M6PRPE=1SV=1;tr|F5H4U1|F5H4U1_HUMANCation-dependentmannose-6-phosphatereceptor(Fragment)OS=HomosapiensGN=M6PRPE=1SV=1;tr|F5GXE0|F5GXE0_HUMANCation-dependentmannose-6-phosphatereceptor(Fragment)OS=HomosapiensGN=M6PRPE=1SV=1;t…	64547	91843	1	1	1	1	1	18113000	1	1	-0.2781	#NUM!
tr|Q5JR95|Q5JR95_HUMAN40SribosomalproteinS8OS=HomosapiensGN=RPS8PE=1SV=1;sp|P62241|RS8_HUMAN40SribosomalproteinS8OS=HomosapiensGN=RPS8PE=1SV=2	36931000	10875000	1	9776300	1	10751000	1	1	10842000	1	0.49821	0.135179
sp|O43866|CD5L_HUMANCD5antigen-likeOS=HomosapiensGN=CD5LPE=1SV=1	1006900	1	1186300000	2542300	1	1	1097700	18677000	569630	1	-0.251222	#NUM!
sp|P01591|IGJ_HUMANImmunoglobulinJchainOS=HomosapiensGN=JCHAINPE=1SV=4;tr|D6RD17|D6RD17_HUMANImmunoglobulinJchain(Fragment)OS=HomosapiensGN=JCHAINPE=1SV=8;tr|D6RHJ6|D6RHJ6_HUMANImmunoglobulinJchain(Fragment)OS=HomosapiensGN=JCHAINPE=1SV=1;tr|C9JA05|C9JA05_HUMANImmunoglobulinJchain(Fragment)OS=HomosapiensGN=JCHAINPE=1SV=1	142140000	69911000	983800000	165920000	280910000	390800000	236970000	413900000	324040000	3453200000	-0.319107	#NUM!
sp|P05455|LA_HUMANLupusLaproteinOS=HomosapiensGN=SSBPE=1SV=2;tr|E9PGX9|E9PGX9_HUMANLupusLaprotein(Fragment)OS=HomosapiensGN=SSBPE=1SV=1;tr|E7ERC4|E7ERC4_HUMANLupusLaprotein(Fragment)OS=HomosapiensGN=SSBPE=1SV=1	1	1	1	1	6194800	6827000	1	1	16108000	1	0.0236602	0.947949
sp|P00734|THRB_HUMANProthrombinOS=HomosapiensGN=F2PE=1SV=2;tr|E9PIT3|E9PIT3_HUMANProthrombinOS=HomosapiensGN=F2PE=1SV=1;tr|C9JV37|C9JV37_HUMANProthrombin(Fragment)OS=HomosapiensGN=F2PE=1SV=1;CON__P00735	2713500	16100000	1420500000	12019000	2126000	4828400	11905000	2372900	4214700	45711000	-0.257588	#NUM!
tr|E7EX53|E7EX53_HUMANRibosomalproteinL15(Fragment)OS=HomosapiensGN=RPL15PE=1SV=1;tr|E7EQV9|E7EQV9_HUMANRibosomalproteinL15(Fragment)OS=HomosapiensGN=RPL15PE=1SV=1;sp|P61313|RL15_HUMAN60SribosomalproteinL15OS=HomosapiensGN=RPL15PE=1SV=2;tr|E7ENU7|E7ENU7_HUMANRibosomalproteinL15(Fragment)OS=HomosapiensGN=RPL15PE=1SV=1	1	4711100	8356300	9720200	1	1	1	71064000	19845000	1	-0.341258	#NUM!
sp|P00740|FA9_HUMANCoagulationfactorIXOS=HomosapiensGN=F9PE=1SV=2	2735000	1	27601000	2092300	1	1	1497300	1	4626300	1	-0.217233	#NUM!
sp|P01023|A2MG_HUMANAlpha-2-macroglobulinOS=HomosapiensGN=A2MPE=1SV=3;CON__ENSEMBL:ENSBTAP00000024146;tr|F8W7L3|F8W7L3_HUMANAlpha-2-macroglobulin(Fragment)OS=HomosapiensGN=A2MPE=1SV=1;tr|F5H1E8|F5H1E8_HUMANAlpha-2-macroglobulinOS=HomosapiensGN=A2MPE=1SV=1	3028300000	827940000	104520000000	1992500000	279340000	502310000	2804000000	2115900000	2666000000	2044200000	-0.250523	#NUM!
sp|Q92598|HS105_HUMANHeatshockprotein105kDaOS=HomosapiensGN=HSPH1PE=1SV=1;tr|A0A0A0MSM0|A0A0A0MSM0_HUMANHeatshockprotein105kDaOS=HomosapiensGN=HSPH1PE=1SV=1;tr|R4GN69|R4GN69_HUMANHeatshockprotein105kDaOS=HomosapiensGN=HSPH1PE=1SV=1;tr|Q5TBM3|Q5TBM3_HUMANHeatshockprotein105kDa(Fragment)OS=HomosapiensGN=HSPH1PE=1SV=1	24449000	3638100	1	10885000	11753000	12545000	12721000	8513100	70780000	8414100	0.0491896	0.89198
sp|Q8TCU6|PREX1_HUMANPhosphatidylinositol3,4,5-trisphosphate-dependentRacexchanger1proteinOS=HomosapiensGN=PREX1PE=1SV=3	1	1	3821700	1	1	1	1	38956000	2392000	1	-0.316925	#NUM!
sp|O00410|IPO5_HUMANImportin-5OS=HomosapiensGN=IPO5PE=1SV=4;tr|H0Y8C6|H0Y8C6_HUMANImportin-5(Fragment)OS=HomosapiensGN=IPO5PE=1SV=1;tr|C9JZ53|C9JZ53_HUMANImportin-5(Fragment)OS=HomosapiensGN=IPO5PE=1SV=1;tr|E7EQT5|E7EQT5_HUMANImportin-5OS=HomosapiensGN=IPO5PE=1SV=1;tr|E7EV12|E7EV12_HUMANImportin-5(Fragment)OS=HomosapiensGN=IPO5PE=1SV=1;tr|C9JMV5|C9JMV5_HUMANImportin-5(Fragment)OS=HomosapiensGN=IP…	1	1	6770900	1	1	1	7023300	6236500	3280700	1	-0.538229	#NUM!
sp|P01042|KNG1_HUMANKininogen-1OS=HomosapiensGN=KNG1PE=1SV=2	27123000	11434000	475670000	8107100	1	23832000	1	10115000	25272000	13307000	-0.249502	#NUM!
tr|B1ALA9|B1ALA9_HUMANRibose-phosphatepyrophosphokinase1OS=HomosapiensGN=PRPS1PE=1SV=1;sp|P60891|PRPS1_HUMANRibose-phosphatepyrophosphokinase1OS=HomosapiensGN=PRPS1PE=1SV=2	1	1	1	1	4165800	1	1	8050700	5202000	1	-0.0431628	#NUM!
sp|P07225|PROS_HUMANVitaminK-dependentproteinSOS=HomosapiensGN=PROS1PE=1SV=1;tr|G5E9F8|G5E9F8_HUMANProteinS(Alpha),isoformCRA_bOS=HomosapiensGN=PROS1PE=1SV=1;tr|H7BXT0|H7BXT0_HUMANVitaminK-dependentproteinS(Fragment)OS=HomosapiensGN=PROS1PE=1SV=1;tr|C9K0R0|C9K0R0_HUMANVitaminK-dependentproteinS(Fragment)OS=HomosapiensGN=PROS1PE=1SV=1;CON__P07224	13222000	10893000	1813100000	12900000	1	29217000	1	10308000	11338000	54446000	-0.256272	#NUM!
sp|P09496|CLCA_HUMANClathrinlightchainAOS=HomosapiensGN=CLTAPE=1SV=1;tr|F8WF69|F8WF69_HUMANClathrinlightchainOS=HomosapiensGN=CLTAPE=1SV=1	2579200	1	3657400	1127700	1	2081600	1	72327000	1799000	1	-0.280011	#NUM!
sp|Q13185|CBX3_HUMANChromoboxproteinhomolog3OS=HomosapiensGN=CBX3PE=1SV=4	1	1	20291000	1	1	1	1	1	741670	1	-0.253838	#NUM!
sp|Q93008|USP9X_HUMANProbableubiquitincarboxyl-terminalhydrolaseFAF-XOS=HomosapiensGN=USP9XPE=1SV=3;sp|O00507|USP9Y_HUMANProbableubiquitincarboxyl-terminalhydrolaseFAF-YOS=HomosapiensGN=USP9YPE=2SV=2	1	2009000	1	1403900	1	1	1	24476000	2159800	1	-0.300229	#NUM!
sp|P50552|VASP_HUMANVasodilator-stimulatedphosphoproteinOS=HomosapiensGN=VASPPE=1SV=3;tr|K7EM16|K7EM16_HUMANVasodilator-stimulatedphosphoprotein(Fragment)OS=HomosapiensGN=VASPPE=1SV=1;tr|K7EQD0|K7EQD0_HUMANVasodilator-stimulatedphosphoprotein(Fragment)OS=HomosapiensGN=VASPPE=1SV=8;tr|K7EIG8|K7EIG8_HUMANVasodilator-stimulatedphosphoprotein(Fragment)OS=HomosapiensGN=VASPPE=1SV=1;tr|K7ENR7|K7ENR7_HU…	1	4743500	1379100	8708600	1	33632000	1	1	10862000	2154200	-0.188564	#NUM!
sp|P20851|C4BPB_HUMANC4b-bindingproteinbetachainOS=HomosapiensGN=C4BPBPE=1SV=1;tr|Q5VVQ7|Q5VVQ7_HUMANC4b-bindingproteinbetachain(Fragment)OS=HomosapiensGN=C4BPBPE=1SV=1	1	1	234780000	1	1	2023400	1	6432600	1	1029400	-0.257963	#NUM!
tr|A0A087WXM6|A0A087WXM6_HUMAN60SribosomalproteinL17(Fragment)OS=HomosapiensGN=RPL17PE=3SV=1;tr|J3QQT2|J3QQT2_HUMAN60SribosomalproteinL17(Fragment)OS=HomosapiensGN=RPL17PE=3SV=1;tr|J3KRX5|J3KRX5_HUMAN60SribosomalproteinL17(Fragment)OS=HomosapiensGN=RPL17PE=3SV=1;sp|P18621|RL17_HUMAN60SribosomalproteinL17OS=HomosapiensGN=RPL17PE=1SV=3;tr|A0A0A6YYL6|A0A0A6YYL6_HUMANProteinRPL17-C18orf32OS=Homosapie…	11639000	1	8795000	6828900	1	8262300	1	2964600	2644200	1	0.260588	0.462837
sp|P42224|STAT1_HUMANSignaltransducerandactivatoroftranscription1-alpha/betaOS=HomosapiensGN=STAT1PE=1SV=2;tr|J3KPM9|J3KPM9_HUMANSignaltransducerandactivatoroftranscriptionOS=HomosapiensGN=STAT1PE=1SV=1;tr|E7EPD2|E7EPD2_HUMANSignaltransducerandactivatoroftranscription1-alpha/beta(Fragment)OS=HomosapiensGN=STAT1PE=1SV=1;tr|D2KFR9|D2KFR9_HUMANSignaltransducerandactivatoroftranscription1-alpha/betaO…	13870000	10980000	3354500	70052000	14583000	18659000	1	1	13744000	19281000	0.339162	0.331889
tr|E7EQR4|E7EQR4_HUMANEzrinOS=HomosapiensGN=EZRPE=1SV=3;sp|P15311|EZRI_HUMANEzrinOS=HomosapiensGN=EZRPE=1SV=4;tr|V9GZ54|V9GZ54_HUMANMoesin(Fragment)OS=HomosapiensGN=MSNPE=1SV=1;tr|E9PQ82|E9PQ82_HUMANRadixin(Fragment)OS=HomosapiensGN=RDXPE=1SV=1;tr|E9PNV3|E9PNV3_HUMANRadixin(Fragment)OS=HomosapiensGN=RDXPE=1SV=1	183420000	270640000	25006000	162840000	15346000	67672000	81540000	71583000	123720000	74513000	0.0551407	0.878984
sp|P13667|PDIA4_HUMANProteindisulfide-isomeraseA4OS=HomosapiensGN=PDIA4PE=1SV=2	1	3582300	1	1	1	1	1	1653600	35739000	1	-0.196161	#NUM!
sp|P52209|6PGD_HUMAN6-phosphogluconatedehydrogenase,decarboxylatingOS=HomosapiensGN=PGDPE=1SV=3;tr|K7EM49|K7EM49_HUMAN6-phosphogluconatedehydrogenase,decarboxylating(Fragment)OS=HomosapiensGN=PGDPE=1SV=1;tr|K7EPF6|K7EPF6_HUMAN6-phosphogluconatedehydrogenase,decarboxylating(Fragment)OS=HomosapiensGN=PGDPE=1SV=1;tr|K7EMN2|K7EMN2_HUMAN6-phosphogluconatedehydrogenase,decarboxylating(Fragment)OS=Homos…	411790000	306310000	10878000	276840000	44985000	67431000	180300000	74173000	209550000	125800000	0.339342	0.331613
sp|P0DOY3|IGLC3_HUMANImmunoglobulinlambdaconstant3OS=HomosapiensGN=IGLC3PE=1SV=1;sp|P0DOY2|IGLC2_HUMANImmunoglobulinlambdaconstant2OS=HomosapiensGN=IGLC2PE=1SV=1;sp|P0CF74|IGLC6_HUMANImmunoglobulinlambdaconstant6OS=HomosapiensGN=IGLC6PE=1SV=1	377100000	613760000	2176800000	620260000	28967000	341590000	1515300000	725360000	1281900000	2350500000	-0.631335	#NUM!
tr|F5H157|F5H157_HUMANRas-relatedproteinRab-35(Fragment)OS=HomosapiensGN=RAB35PE=1SV=1;sp|Q15286|RAB35_HUMANRas-relatedproteinRab-35OS=HomosapiensGN=RAB35PE=1SV=1;tr|F5H7F8|F5H7F8_HUMANRas-relatedproteinRab-35OS=HomosapiensGN=RAB35PE=1SV=1	1	2431600	1	1656200	1	2122500	1	7941000	758850	572220	-0.367434	#NUM!
sp|P59666|DEF3_HUMANNeutrophildefensin3OS=HomosapiensGN=DEFA3PE=1SV=1	188660000	1239900000	1	876710000	107020000	145290000	218690000	7978300000	1211200000	134620000	-0.307967	#NUM!
sp|P01871|IGHM_HUMANImmunoglobulinheavyconstantmuOS=HomosapiensGN=IGHMPE=1SV=4;tr|A0A1B0GUU9|A0A1B0GUU9_HUMANImmunoglobulinheavyconstantmu(Fragment)OS=HomosapiensGN=IGHMPE=1SV=1	2866600000	792380000	18197000000	1076500000	67025000	146740000	1642400000	1669000000	1501400000	1813600000	-0.245426	#NUM!
sp|P51857|AK1D1_HUMAN3-oxo-5-beta-steroid4-dehydrogenaseOS=HomosapiensGN=AKR1D1PE=1SV=1	1	1	1	1	90830000	1	1	5216300	1	1	0.632677	0.0434521
sp|Q8IWL2|SFTA1_HUMANPulmonarysurfactant-associatedproteinA1OS=HomosapiensGN=SFTPA1PE=1SV=2;sp|Q8IWL1|SFPA2_HUMANPulmonarysurfactant-associatedproteinA2OS=HomosapiensGN=SFTPA2PE=1SV=1;tr|X6REF7|X6REF7_HUMANPulmonarysurfactant-associatedproteinA2(Fragment)OS=HomosapiensGN=SFTPA2PE=4SV=1;tr|A0A0C4DG36|A0A0C4DG36_HUMANPulmonarysurfactant-associatedproteinA1(Fragment)OS=HomosapiensGN=SFTPA1PE=4SV=1	3124200000	6131000000	1702600000	12277000000	26546000	6835700000	6611600000	1097400000	6654500000	19782000000	-0.275724	#NUM!
sp|P08246|ELNE_HUMANNeutrophilelastaseOS=HomosapiensGN=ELANEPE=1SV=1	199040000	196890000	24918000	134700000	3014100000	1934300	1	767570000	1	1	0.619856	0.0494882
sp|Q99536|VAT1_HUMANSynapticvesiclemembraneproteinVAT-1homologOS=HomosapiensGN=VAT1PE=1SV=2;tr|K7ESA3|K7ESA3_HUMANSynapticvesiclemembraneproteinVAT-1homolog(Fragment)OS=HomosapiensGN=VAT1PE=1SV=1;tr|K7ERT7|K7ERT7_HUMANSynapticvesiclemembraneproteinVAT-1homolog(Fragment)OS=HomosapiensGN=VAT1PE=1SV=1;tr|K7ENX2|K7ENX2_HUMANSynapticvesiclemembraneproteinVAT-1homolog(Fragment)OS=HomosapiensGN=VAT1PE=1…	26113000	58651000	1	57064000	1	78127000	28599000	20109000	27577000	70700000	-0.292952	#NUM!
sp|P05198|IF2A_HUMANEukaryotictranslationinitiationfactor2subunit1OS=HomosapiensGN=EIF2S1PE=1SV=3;tr|H0YJS4|H0YJS4_HUMANEukaryotictranslationinitiationfactor2subunit1(Fragment)OS=HomosapiensGN=EIF2S1PE=1SV=1;tr|G3V4T5|G3V4T5_HUMANEukaryotictranslationinitiationfactor2subunit1(Fragment)OS=HomosapiensGN=EIF2S1PE=1SV=1	1	1	1	1	1829100	1	1	1	15151000	818300	-0.09875	#NUM!
tr|C9JP35|C9JP35_HUMANProteinFAM3C(Fragment)OS=HomosapiensGN=FAM3CPE=1SV=1;tr|C9JMN4|C9JMN4_HUMANProteinFAM3C(Fragment)OS=HomosapiensGN=FAM3CPE=1SV=1;sp|Q92520|FAM3C_HUMANProteinFAM3COS=HomosapiensGN=FAM3CPE=1SV=1	1	1	1	1	990830	1	1	15344000	1	1	-0.238474	#NUM!
sp|Q9UGM3|DMBT1_HUMANDeletedinmalignantbraintumors1proteinOS=HomosapiensGN=DMBT1PE=1SV=2	3793200000	982990000	89573000	938040000	1	87435000	481560000	906550000	281060000	769840000	0.454706	0.179323
tr|A0A0A0MSV6|A0A0A0MSV6_HUMANComplementC1qsubcomponentsubunitB(Fragment)OS=HomosapiensGN=C1QBPE=1SV=6;tr|D6R934|D6R934_HUMANComplementC1qsubcomponentsubunitBOS=HomosapiensGN=C1QBPE=1SV=1;sp|P02746|C1QB_HUMANComplementC1qsubcomponentsubunitBOS=HomosapiensGN=C1QBPE=1SV=3;tr|D6RGJ1|D6RGJ1_HUMANComplementC1qsubcomponentsubunitB(Fragment)OS=HomosapiensGN=C1QBPE=1SV=1	64714000	15054000	1434300000	18278000	1	82398000	1	15309000	59349000	65690000	-0.254484	#NUM!
sp|P62906|RL10A_HUMAN60SribosomalproteinL10aOS=HomosapiensGN=RPL10APE=1SV=2	1	1753800	1	1222800	1	1651600	1	1	15284000	1	-0.184345	#NUM!
sp|P05164|PERM_HUMANMyeloperoxidaseOS=HomosapiensGN=MPOPE=1SV=1	52022000	47839000	12540000	48257000	513800000	4774000	123190000	4858900000	142310000	3244200	-0.218614	#NUM!
sp|Q96GA7|SDSL_HUMANSerinedehydratase-likeOS=HomosapiensGN=SDSLPE=1SV=1	1	2610900	2021400	3209100	1	1	1	2020400	1988600	1	-0.268928	#NUM!
sp|P02647|APOA1_HUMANApolipoproteinA-IOS=HomosapiensGN=APOA1PE=1SV=1;tr|F8W696|F8W696_HUMANApolipoproteinA-IOS=HomosapiensGN=APOA1PE=1SV=1	483070000	320570000	5628800000	370850000	2174900	83593000	278580000	338650000	999630000	101070000	-0.267186	#NUM!
sp|Q9HC35|EMAL4_HUMANEchinodermmicrotubule-associatedprotein-like4OS=HomosapiensGN=EML4PE=1SV=3;tr|B5MBZ0|B5MBZ0_HUMANEchinodermmicrotubule-associatedprotein-like4OS=HomosapiensGN=EML4PE=1SV=3	6419800	15350000	1	22585000	1	1	1	1	18046000	1	0.114519	0.751105
sp|Q06323|PSME1_HUMANProteasomeactivatorcomplexsubunit1OS=HomosapiensGN=PSME1PE=1SV=1;tr|H0YKK6|H0YKK6_HUMANProteasomeactivatorcomplexsubunit1OS=HomosapiensGN=PSME1PE=1SV=1;tr|H0YLU2|H0YLU2_HUMANProteasomeactivatorcomplexsubunit1(Fragment)OS=HomosapiensGN=PSME1PE=1SV=1	1	9872900	1	19173000	1	1	1	9424200	1	1	0.00426583	0.990611
sp|Q9NP97|DLRB1_HUMANDyneinlightchainroadblock-type1OS=HomosapiensGN=DYNLRB1PE=1SV=3;sp|Q8TF09|DLRB2_HUMANDyneinlightchainroadblock-type2OS=HomosapiensGN=DYNLRB2PE=1SV=1;tr|H3BNG9|H3BNG9_HUMANDyneinlightchainroadblock-type2OS=HomosapiensGN=DYNLRB2PE=4SV=1;tr|H3BPA0|H3BPA0_HUMANDyneinlightchainroadblock-type2OS=HomosapiensGN=DYNLRB2PE=4SV=1;tr|Q7Z4M1|Q7Z4M1_HUMANDYNLRB2proteinOS=HomosapiensGN=DYNL…	38643000	20648000	1	17103000	1	1	6874500	10156000	21731000	1	0.354257	0.309132
sp|P78527|PRKDC_HUMANDNA-dependentproteinkinasecatalyticsubunitOS=HomosapiensGN=PRKDCPE=1SV=3	11875000	5558700	2491300	12980000	1	9815900	1	139840000	5433500	1948900	-0.248363	#NUM!
tr|H0YIB4|H0YIB4_HUMANSerine/arginine-rich-splicingfactor9(Fragment)OS=HomosapiensGN=SRSF9PE=1SV=8;tr|S4R3G0|S4R3G0_HUMANSerine/arginine-rich-splicingfactor9OS=HomosapiensGN=SRSF9PE=1SV=1;sp|Q13242|SRSF9_HUMANSerine/arginine-richsplicingfactor9OS=HomosapiensGN=SRSF9PE=1SV=1	1	1	1014600	1	1	2140200	1	1	1004000	1	-0.308488	#NUM!
sp|P30488|1B50_HUMANHLAclassIhistocompatibilityantigen,B-50alphachainOS=HomosapiensGN=HLA-BPE=1SV=1;sp|P30487|1B49_HUMANHLAclassIhistocompatibilityantigen,B-49alphachainOS=HomosapiensGN=HLA-BPE=1SV=2;sp|P30483|1B45_HUMANHLAclassIhistocompatibilityantigen,B-45alphachainOS=HomosapiensGN=HLA-BPE=1SV=1	1	1	1	14711000	1	12138000	1	17786000	5411900	1	-0.18234	#NUM!
sp|P27361|MK03_HUMANMitogen-activatedproteinkinase3OS=HomosapiensGN=MAPK3PE=1SV=4;tr|H0YEX6|H0YEX6_HUMANMitogen-activatedproteinkinase3(Fragment)OS=HomosapiensGN=MAPK3PE=1SV=1;tr|B3KR49|B3KR49_HUMANMitogen-activatedproteinkinase3OS=HomosapiensGN=MAPK3PE=1SV=1;tr|E9PBK7|E9PBK7_HUMANMitogen-activatedproteinkinaseOS=HomosapiensGN=MAPK3PE=1SV=1;tr|E9PJF0|E9PJF0_HUMANMitogen-activatedproteinkinaseOS=H…	1763300	1	1	1797700	1	4169400	1	1	2549400	979770	0.041951	0.907817
sp|P31997|CEAM8_HUMANCarcinoembryonicantigen-relatedcelladhesionmolecule8OS=HomosapiensGN=CEACAM8PE=1SV=2;sp|P13688|CEAM1_HUMANCarcinoembryonicantigen-relatedcelladhesionmolecule1OS=HomosapiensGN=CEACAM1PE=1SV=2	7348300	1172600	1	767550	1	1	1	80930000	1165900	1	-0.232404	#NUM!
sp|P61009|SPCS3_HUMANSignalpeptidasecomplexsubunit3OS=HomosapiensGN=SPCS3PE=1SV=1	18169000	11478000	1	13941000	20894000	1	1	29883000	3738000	1	0.474122	0.158713
tr|A0A0U1RQF0|A0A0U1RQF0_HUMANFattyacidsynthaseOS=HomosapiensGN=FASNPE=1SV=1;sp|P49327|FAS_HUMANFattyacidsynthaseOS=HomosapiensGN=FASNPE=1SV=3;tr|A0A1B0GTR5|A0A1B0GTR5_HUMANFattyacidsynthase(Fragment)OS=HomosapiensGN=FASNPE=1SV=1;tr|A0A0U1RRG3|A0A0U1RRG3_HUMANFattyacidsynthase(Fragment)OS=HomosapiensGN=FASNPE=1SV=1	1	1	1	7333800	22901000	1	1	62166000	26549000	1	-0.0801395	#NUM!
sp|O00471|EXOC5_HUMANExocystcomplexcomponent5OS=HomosapiensGN=EXOC5PE=1SV=1;tr|A0A0A0MSI8|A0A0A0MSI8_HUMANExocystcomplexcomponent5OS=HomosapiensGN=EXOC5PE=1SV=1;tr|F8W9B8|F8W9B8_HUMANExocystcomplexcomponent5OS=HomosapiensGN=EXOC5PE=1SV=1	1	1	1	1746600	1	1	1	17714000	1	1	-0.257374	#NUM!
sp|Q96D96|HVCN1_HUMANVoltage-gatedhydrogenchannel1OS=HomosapiensGN=HVCN1PE=1SV=1	1	1	1	1	23875000	1	1	2390100	1	1	0.621581	0.0486454
sp|P31930|QCR1_HUMANCytochromeb-c1complexsubunit1,mitochondrialOS=HomosapiensGN=UQCRC1PE=1SV=3	1	1	1	2787700	1	1	1972800	8973600	1	1	-0.249923	#NUM!
sp|Q96KP4|CNDP2_HUMANCytosolicnon-specificdipeptidaseOS=HomosapiensGN=CNDP2PE=1SV=2;tr|J3QKT2|J3QKT2_HUMANCytosolicnon-specificdipeptidase(Fragment)OS=HomosapiensGN=CNDP2PE=1SV=1;tr|J3QQN6|J3QQN6_HUMANCytosolicnon-specificdipeptidase(Fragment)OS=HomosapiensGN=CNDP2PE=1SV=1;tr|J3QR27|J3QR27_HUMANCytosolicnon-specificdipeptidase(Fragment)OS=HomosapiensGN=CNDP2PE=1SV=1;tr|J3QLU1|J3QLU1_HUMANCytosoli…	38179000	44633000	9935400	97931000	1	81107000	34112000	101190000	36560000	36237000	-0.246641	#NUM!
tr|G3XAM7|G3XAM7_HUMANCatenin(Cadherin-associatedprotein),alpha1,102kDa,isoformCRA_aOS=HomosapiensGN=CTNNA1PE=1SV=1;sp|P35221|CTNA1_HUMANCateninalpha-1OS=HomosapiensGN=CTNNA1PE=1SV=1;tr|E5RJ41|E5RJ41_HUMANCateninalpha-1(Fragment)OS=HomosapiensGN=CTNNA1PE=1SV=1;tr|E5RIB1|E5RIB1_HUMANCateninalpha-1(Fragment)OS=HomosapiensGN=CTNNA1PE=1SV=1;tr|A0A0A0MTJ6|A0A0A0MTJ6_HUMANCateninalpha-2OS=HomosapiensGN…	1	1	1	2725000	5398300	1	1	30300000	4477400	1	-0.170609	#NUM!
sp|P27105|STOM_HUMANErythrocyteband7integralmembraneproteinOS=HomosapiensGN=STOMPE=1SV=3;tr|F8VSL7|F8VSL7_HUMANErythrocyteband7integralmembraneproteinOS=HomosapiensGN=STOMPE=1SV=1	138050000	79645000	3774300	74716000	32915000	106430000	8988000	485930000	96791000	30837000	-0.164975	#NUM!
sp|O94804|STK10_HUMANSerine/threonine-proteinkinase10OS=HomosapiensGN=STK10PE=1SV=1;tr|H0YB71|H0YB71_HUMANSerine/threonine-proteinkinase10(Fragment)OS=HomosapiensGN=STK10PE=1SV=1	9205400	8133200	1	10471000	25403000	8935200	1	15981000	5650800	1	0.634579	0.0426006
tr|D6RB59|D6RB59_HUMANExocystcomplexcomponent3OS=HomosapiensGN=EXOC3PE=1SV=1;sp|O60645|EXOC3_HUMANExocystcomplexcomponent3OS=HomosapiensGN=EXOC3PE=1SV=2	1	1	2301400	1	1	1	1	12684000	878100	1	-0.338595	#NUM!
sp|P02656|APOC3_HUMANApolipoproteinC-IIIOS=HomosapiensGN=APOC3PE=1SV=1;tr|B0YIW2|B0YIW2_HUMANApolipoproteinC-IIIOS=HomosapiensGN=APOC3PE=1SV=1	83886000	32496000	264080000	29840000	1	20295000	55759000	81269000	6968900	29108000	-0.251743	#NUM!
tr|H0YN07|H0YN07_HUMANImportin-4(Fragment)OS=HomosapiensGN=IPO4PE=1SV=1;tr|H0YMR4|H0YMR4_HUMANImportin-4(Fragment)OS=HomosapiensGN=IPO4PE=1SV=1;sp|Q8TEX9|IPO4_HUMANImportin-4OS=HomosapiensGN=IPO4PE=1SV=2	1	1	1	1908800	2185700	1	1	7664000	3441900	1	-0.106536	#NUM!
tr|B7ZL14|B7ZL14_HUMANFNBP1proteinOS=HomosapiensGN=FNBP1PE=1SV=1;tr|H0Y7W6|H0Y7W6_HUMANFormin-bindingprotein1(Fragment)OS=HomosapiensGN=FNBP1PE=1SV=2;sp|Q96RU3|FNBP1_HUMANFormin-bindingprotein1OS=HomosapiensGN=FNBP1PE=1SV=2	1	1	1	1	7538700	3350000	1	16561000	2698500	1	-0.0394483	#NUM!
sp|Q14764|MVP_HUMANMajorvaultproteinOS=HomosapiensGN=MVPPE=1SV=4;tr|H3BUK7|H3BUK7_HUMANMajorvaultprotein(Fragment)OS=HomosapiensGN=MVPPE=1SV=1;tr|H3BRL2|H3BRL2_HUMANMajorvaultprotein(Fragment)OS=HomosapiensGN=MVPPE=1SV=8;tr|H3BQK6|H3BQK6_HUMANMajorvaultprotein(Fragment)OS=HomosapiensGN=MVPPE=1SV=1;tr|H3BP76|H3BP76_HUMANMajorvaultprotein(Fragment)OS=HomosapiensGN=MVPPE=1SV=1;tr|H3BPZ2|H3BPZ2_HUMAN…	298510000	100350000	10956000	134270000	53394000	125450000	64166000	446070000	183320000	139320000	-0.00613675	#NUM!
sp|A0A0C4DH29|HV103_HUMANImmunoglobulinheavyvariable1-3OS=HomosapiensGN=IGHV1-3PE=3SV=1;sp|P0DP01|HV108_HUMANImmunoglobulinheavyvariable1-8OS=HomosapiensGN=IGHV1-8PE=3SV=1;sp|P01743|HV146_HUMANImmunoglobulinheavyvariable1-46OS=HomosapiensGN=IGHV1-46PE=1SV=2;sp|A0A0B4J2H0|HV69D_HUMANImmunoglobulinheavyvariable1-69DOS=HomosapiensGN=IGHV1-69DPE=3SV=1	1	21547000	7041400	1	1	1	1	9660200	121300000	2554500	-0.241554	#NUM!
sp|P14866|HNRPL_HUMANHeterogeneousnuclearribonucleoproteinLOS=HomosapiensGN=HNRNPLPE=1SV=2;tr|M0QYT0|M0QYT0_HUMANUncharacterizedprotein(Fragment)OS=HomosapiensPE=1SV=1;tr|M0QXS5|M0QXS5_HUMANHeterogeneousnuclearribonucleoproteinL(Fragment)OS=HomosapiensGN=HNRNPLPE=1SV=1;tr|M0R076|M0R076_HUMANUncharacterizedprotein(Fragment)OS=HomosapiensPE=1SV=1	1	1	1	4209000	1	6259200	1	1	4033100	536940	-0.0911069	#NUM!
tr|H0Y300|H0Y300_HUMANHaptoglobinOS=HomosapiensGN=HPPE=1SV=4	1	1	9184200	1	1	552420	1	1	632160	1	-0.269677	#NUM!
sp|P51812|KS6A3_HUMANRibosomalproteinS6kinasealpha-3OS=HomosapiensGN=RPS6KA3PE=1SV=1;sp|Q9UK32|KS6A6_HUMANRibosomalproteinS6kinasealpha-6OS=HomosapiensGN=RPS6KA6PE=1SV=1;tr|B1AXG2|B1AXG2_HUMANRibosomalproteinS6kinasealpha-3(Fragment)OS=HomosapiensGN=RPS6KA3PE=1SV=1;tr|E9PAN7|E9PAN7_HUMANRibosomalproteinS6kinasealpha-1OS=HomosapiensGN=RPS6KA1PE=1SV=1;tr|B1AXG1|B1AXG1_HUMANRibosomalproteinS6kinasea…	1	1	67978000	16649000	1	1	1	19362000	5912200	1	-0.285162	#NUM!
sp|P68036|UB2L3_HUMANUbiquitin-conjugatingenzymeE2L3OS=HomosapiensGN=UBE2L3PE=1SV=1	14746000	1	46530000	1	13551000	14886000	1	1	18860000	1	0.00988249	0.978249
sp|P46777|RL5_HUMAN60SribosomalproteinL5OS=HomosapiensGN=RPL5PE=1SV=3;tr|Q5T7N0|Q5T7N0_HUMAN60SribosomalproteinL5(Fragment)OS=HomosapiensGN=RPL5PE=1SV=2	1	1	9528300	4038100	1	1	1	1	3470500	1464300	-0.234958	#NUM!
tr|A0A0G2JMB2|A0A0G2JMB2_HUMANImmunoglobulinheavyconstantalpha2(Fragment)OS=HomosapiensGN=IGHA2PE=1SV=1;sp|P01877|IGHA2_HUMANImmunoglobulinheavyconstantalpha2OS=HomosapiensGN=IGHA2PE=1SV=4	23946000	23786000	22774000	31713000	1	543910	1	29275000	7667600	427580000	-0.235402	#NUM!
sp|O95782|AP2A1_HUMANAP-2complexsubunitalpha-1OS=HomosapiensGN=AP2A1PE=1SV=3;tr|E9PPZ3|E9PPZ3_HUMANAP-2complexsubunitalpha-2(Fragment)OS=HomosapiensGN=AP2A2PE=4SV=1;tr|E9PS94|E9PS94_HUMANAP-2complexsubunitalpha-2(Fragment)OS=HomosapiensGN=AP2A2PE=4SV=1;tr|E9PQP4|E9PQP4_HUMANAP-2complexsubunitalpha-2(Fragment)OS=HomosapiensGN=AP2A2PE=1SV=1;tr|E9PPY8|E9PPY8_HUMANAP-2complexsubunitalpha-2(Fragment)O…	504840	721690	75581000	424690	1	1	1	8541000	3472300	1	-0.286536	#NUM!
sp|P68366|TBA4A_HUMANTubulinalpha-4AchainOS=HomosapiensGN=TUBA4APE=1SV=1;tr|C9JEV8|C9JEV8_HUMANTubulinalphachain(Fragment)OS=HomosapiensGN=TUBA4APE=1SV=1;tr|C9JQ00|C9JQ00_HUMANTubulinalphachain(Fragment)OS=HomosapiensGN=TUBA4APE=1SV=1;tr|C9JJQ8|C9JJQ8_HUMANTubulinalphachain(Fragment)OS=HomosapiensGN=TUBA4APE=1SV=1;tr|C9JDS9|C9JDS9_HUMANTubulinalpha-4Achain(Fragment)OS=HomosapiensGN=TUBA4APE=1SV=1…	77225000	3385100	3026500	1589100	1	6861100	7767700	1812600	2978300	654210	0.527093	0.109908
sp|P30041|PRDX6_HUMANPeroxiredoxin-6OS=HomosapiensGN=PRDX6PE=1SV=3	49135000	92096000	6633800	276370000	119730000	75092000	34161000	49142000	108470000	72141000	0.36558	0.292602
tr|E9PN17|E9PN17_HUMANATPsynthasesubunitg,mitochondrialOS=HomosapiensGN=ATP5LPE=1SV=1;sp|O75964|ATP5L_HUMANATPsynthasesubunitg,mitochondrialOS=HomosapiensGN=ATP5LPE=1SV=3	4630900	14323000	1	22194000	1	1	1	1	17296000	1	0.089096	0.805387
sp|Q12929|EPS8_HUMANEpidermalgrowthfactorreceptorkinasesubstrate8OS=HomosapiensGN=EPS8PE=1SV=1;tr|F5H1B5|F5H1B5_HUMANEpidermalgrowthfactorreceptorkinasesubstrate8(Fragment)OS=HomosapiensGN=EPS8PE=1SV=1;tr|F5H2B8|F5H2B8_HUMANEpidermalgrowthfactorreceptorkinasesubstrate8(Fragment)OS=HomosapiensGN=EPS8PE=1SV=1;tr|F5GYM8|F5GYM8_HUMANEpidermalgrowthfactorreceptorkinasesubstrate8(Fragment)OS=Homosapien…	1900800	1	1	1769800	1	1	743330	20121000	1	1	-0.215824	#NUM!
sp|P08697|A2AP_HUMANAlpha-2-antiplasminOS=HomosapiensGN=SERPINF2PE=1SV=3;tr|A0A0G2JPA8|A0A0G2JPA8_HUMANAlpha-2-antiplasminOS=HomosapiensGN=SERPINF2PE=1SV=1;tr|C9JMH6|C9JMH6_HUMANAlpha-2-antiplasmin(Fragment)OS=HomosapiensGN=SERPINF2PE=1SV=1;tr|A0A0J9YY65|A0A0J9YY65_HUMANAlpha-2-antiplasmin(Fragment)OS=HomosapiensGN=SERPINF2PE=1SV=1;tr|C9JPV4|C9JPV4_HUMANAlpha-2-antiplasmin(Fragment)OS=Homosapiens…	27121000	16941000	42592000	15192000	1	8127100	15040000	67197000	68865000	9788600	-0.401948	#NUM!
sp|Q04917|1433F_HUMAN14-3-3proteinetaOS=HomosapiensGN=YWHAHPE=1SV=4;tr|A2IDB2|A2IDB2_HUMAN14-3-3proteineta(Fragment)OS=HomosapiensGN=YWHAHPE=1SV=1;tr|F8WEB6|F8WEB6_HUMAN14-3-3proteinetaOS=HomosapiensGN=YWHAHPE=1SV=1;tr|A2IDB1|A2IDB1_HUMAN14-3-3proteinetaOS=HomosapiensGN=YWHAHPE=1SV=1	59845000	36828000	8135600	62162000	1	65670000	1	91323000	89434000	17653000	-0.120484	#NUM!
sp|P62805|H4_HUMANHistoneH4OS=HomosapiensGN=HIST1H4APE=1SV=2	1307100000	677520000	779480000	615150000	1	450250000	323850000	12710000000	135270000	391310000	-0.262571	#NUM!
sp|O60749|SNX2_HUMANSortingnexin-2OS=HomosapiensGN=SNX2PE=1SV=2;tr|D6RC15|D6RC15_HUMANSortingnexin-2(Fragment)OS=HomosapiensGN=SNX2PE=1SV=8	1	9691500	28589000	1	1	26660000	1	7796400	23369000	12211000	-0.585502	#NUM!
sp|P16401|H15_HUMANHistoneH1.5OS=HomosapiensGN=HIST1H1BPE=1SV=3	67891000	1	1	1813000	1	6434200	1	4869700	621730	1	0.550019	0.0920965
sp|Q86XW9|TXND6_HUMANThioredoxindomain-containingprotein6OS=HomosapiensGN=NME9PE=2SV=1;tr|C9JXP5|C9JXP5_HUMANThioredoxindomain-containingprotein6(Fragment)OS=HomosapiensGN=NME9PE=1SV=1	6242900	5424600	1	4611700	1	1	7623200	1	1	1	0.207854	0.561198
sp|P40227|TCPZ_HUMANT-complexprotein1subunitzetaOS=HomosapiensGN=CCT6APE=1SV=3;sp|Q92526|TCPW_HUMANT-complexprotein1subunitzeta-2OS=HomosapiensGN=CCT6BPE=1SV=5;tr|J3KRI6|J3KRI6_HUMANT-complexprotein1subunitzeta-2(Fragment)OS=HomosapiensGN=CCT6BPE=1SV=1	11330000	5746300	3787600	12475000	1	1219400	1	27369000	45118000	1	-0.165683	#NUM!
sp|Q02790|FKBP4_HUMANPeptidyl-prolylcis-transisomeraseFKBP4OS=HomosapiensGN=FKBP4PE=1SV=3;tr|H0YFG2|H0YFG2_HUMANPeptidyl-prolylcis-transisomeraseFKBP4(Fragment)OS=HomosapiensGN=FKBP4PE=1SV=1	3190500	10379000	5630200	8950300	1	5564400	1	4955500	6619300	1336900	-0.259125	#NUM!
sp|Q9NZT1|CALL5_HUMANCalmodulin-likeprotein5OS=HomosapiensGN=CALML5PE=1SV=2	1	1	1	1	6572300	23203000	1	1	836150	2350000	0.0112695	0.975197
sp|Q08J23|NSUN2_HUMANtRNA(cytosine(34)-C(5))-methyltransferaseOS=HomosapiensGN=NSUN2PE=1SV=2;tr|A0A140T9Y7|A0A140T9Y7_HUMANtRNA(cytosine(34)-C(5))-methyltransferaseOS=HomosapiensGN=NSUN2PE=1SV=1	8275300	1	1	1	1	7690700	1	10401000	1595500	1	0.0342939	0.9246
sp|P61158|ARP3_HUMANActin-relatedprotein3OS=HomosapiensGN=ACTR3PE=1SV=3;tr|B4DXW1|B4DXW1_HUMANActin-relatedprotein3OS=HomosapiensGN=ACTR3PE=1SV=1;tr|F8WDR7|F8WDR7_HUMANActin-relatedprotein3(Fragment)OS=HomosapiensGN=ACTR3PE=1SV=2;sp|Q9P1U1|ARP3B_HUMANActin-relatedprotein3BOS=HomosapiensGN=ACTR3BPE=2SV=1;tr|F8WEW2|F8WEW2_HUMANActin-relatedprotein3OS=HomosapiensGN=ACTR3PE=1SV=1;tr|F8WE84|F8WE84_HUM…	104140000	49346000	12575000	106330000	1	78789000	39892000	375300000	39731000	31464000	-0.191439	#NUM!
tr|X6RLJ0|X6RLJ0_HUMANComplementC1qsubcomponentsubunitA(Fragment)OS=HomosapiensGN=C1QAPE=1SV=7;sp|P02745|C1QA_HUMANComplementC1qsubcomponentsubunitAOS=HomosapiensGN=C1QAPE=1SV=2	21816000	1	760820000	20312000	1	46867000	1	100590000	3665600	16779000	-0.282225	#NUM!
sp|P05091|ALDH2_HUMANAldehydedehydrogenase,mitochondrialOS=HomosapiensGN=ALDH2PE=1SV=2;tr|F8VP50|F8VP50_HUMANUncharacterizedprotein(Fragment)OS=HomosapiensPE=4SV=3;tr|S4R3S4|S4R3S4_HUMANAldehydedehydrogenase,mitochondrial(Fragment)OS=HomosapiensGN=ALDH2PE=1SV=1;tr|H0YMG7|H0YMG7_HUMANRetinaldehydrogenase2OS=HomosapiensGN=ALDH1A2PE=1SV=1;sp|O94788|AL1A2_HUMANRetinaldehydrogenase2OS=HomosapiensGN=AL…	10716000	20898000	1861200	272130000	1	25204000	3288300	7066100	35991000	12312000	0.194229	0.587786
sp|P02749|APOH_HUMANBeta-2-glycoprotein1OS=HomosapiensGN=APOHPE=1SV=3;tr|J3KS17|J3KS17_HUMANBeta-2-glycoprotein1(Fragment)OS=HomosapiensGN=APOHPE=1SV=1;tr|J3QRN2|J3QRN2_HUMANBeta-2-glycoprotein1(Fragment)OS=HomosapiensGN=APOHPE=1SV=1;tr|J3QLI0|J3QLI0_HUMANBeta-2-glycoprotein1(Fragment)OS=HomosapiensGN=APOHPE=1SV=1;CON__P17690	1	1	409940000	2117200	1	6182400	1	36526000	21000000	6227200	-0.289079	#NUM!
tr|A0A0B4J2B5|A0A0B4J2B5_HUMANImmunoglobulinheavyvariable3/OR16-9(non-functional)(Fragment)OS=HomosapiensGN=IGHV3OR16-9PE=1SV=1;tr|A0A075B7F0|A0A075B7F0_HUMANImmunoglobulinheavyvariable3/OR16-10(non-functional)(Fragment)OS=HomosapiensGN=IGHV3OR16-10PE=1SV=1;sp|A0A0C4DH32|HV320_HUMANImmunoglobulinheavyvariable3-20OS=HomosapiensGN=IGHV3-20PE=3SV=2	78026000	47586000	381130000	75419000	1	19037000	20250000	12129000	61525000	163940000	-0.274172	#NUM!
sp|P01780|HV307_HUMANImmunoglobulinheavyvariable3-7OS=HomosapiensGN=IGHV3-7PE=1SV=2;sp|P01763|HV348_HUMANImmunoglobulinheavyvariable3-48OS=HomosapiensGN=IGHV3-48PE=1SV=2;sp|P01762|HV311_HUMANImmunoglobulinheavyvariable3-11OS=HomosapiensGN=IGHV3-11PE=1SV=2;sp|A0A0B4J1V1|HV321_HUMANImmunoglobulinheavyvariable3-21OS=HomosapiensGN=IGHV3-21PE=1SV=1	2110000	1	48742000	1	1	2128700	1	1	1	8107900	-0.27102	#NUM!
sp|P62937|PPIA_HUMANPeptidyl-prolylcis-transisomeraseAOS=HomosapiensGN=PPIAPE=1SV=2;tr|F8WE65|F8WE65_HUMANPeptidyl-prolylcis-transisomeraseOS=HomosapiensGN=PPIAPE=1SV=1;tr|C9J5S7|C9J5S7_HUMANPeptidyl-prolylcis-transisomeraseOS=HomosapiensGN=PPIAPE=1SV=1;tr|E5RIZ5|E5RIZ5_HUMANPeptidyl-prolylcis-transisomeraseAOS=HomosapiensGN=PPIAPE=1SV=1;tr|A0A0H2UH34|A0A0H2UH34_HUMANPeptidyl-prolylcis-transisome…	27626000	98443000	15050000	150030000	1	9424900	13486000	4620600	103240000	21508000	0.0134603	0.970377
sp|Q9NPP4|NLRC4_HUMANNLRfamilyCARDdomain-containingprotein4OS=HomosapiensGN=NLRC4PE=1SV=2	1	10168000	3243400	1	1	5121600	1	30303000	2164700	618830	-0.413835	#NUM!
sp|Q14376|GALE_HUMANUDP-glucose4-epimeraseOS=HomosapiensGN=GALEPE=1SV=2;tr|Q5QPP1|Q5QPP1_HUMANUDP-glucose4-epimerase(Fragment)OS=HomosapiensGN=GALEPE=1SV=1;tr|Q5QPP9|Q5QPP9_HUMANUDP-glucose4-epimerase(Fragment)OS=HomosapiensGN=GALEPE=1SV=1;tr|Q5QPP3|Q5QPP3_HUMANUDP-glucose4-epimerase(Fragment)OS=HomosapiensGN=GALEPE=1SV=1;tr|Q5QPP4|Q5QPP4_HUMANUDP-glucose4-epimerase(Fragment)OS=HomosapiensGN=GALE…	1	20754000	13280000	2878800	1	5784400	2133100	67021000	9671000	5386800	-0.457064	#NUM!
sp|A0A075B6J9|LV218_HUMANImmunoglobulinlambdavariable2-18OS=HomosapiensGN=IGLV2-18PE=3SV=2	1	1	10885000	1	1	1	1	1	1906900	1	-0.276721	#NUM!
sp|P34932|HSP74_HUMANHeatshock70kDaprotein4OS=HomosapiensGN=HSPA4PE=1SV=4;tr|A0A087WTS8|A0A087WTS8_HUMANHeatshock70kDaprotein4OS=HomosapiensGN=HSPA4PE=1SV=1;tr|A0A087WYC1|A0A087WYC1_HUMANHeatshock70kDaprotein4OS=HomosapiensGN=HSPA4PE=1SV=1	1	9761900	1	28755000	1	1	1	1	13374000	1	0.0923927	0.798303
sp|O14745|NHRF1_HUMANNa(+)/H(+)exchangeregulatorycofactorNHE-RF1OS=HomosapiensGN=SLC9A3R1PE=1SV=4;tr|J3QRP6|J3QRP6_HUMANNa(+)/H(+)exchangeregulatorycofactorNHE-RF1(Fragment)OS=HomosapiensGN=SLC9A3R1PE=1SV=1	1	1	32453000	1	18595000	18182000	1	74906000	11928000	6857400	-0.312865	#NUM!
sp|Q00722|PLCB2_HUMAN1-phosphatidylinositol4,5-bisphosphatephosphodiesterasebeta-2OS=HomosapiensGN=PLCB2PE=1SV=2	6363300	1	1	1	1	1	1	1	1128800	1	0.542845	0.097459
sp|Q07954|LRP1_HUMANProlow-densitylipoproteinreceptor-relatedprotein1OS=HomosapiensGN=LRP1PE=1SV=2;tr|Q6PJ72|Q6PJ72_HUMANLRP1proteinOS=HomosapiensGN=LRP1PE=1SV=1	7388500	13873000	69662000	22181000	14682000	17458000	32089000	2782500	11682000	14188000	-0.264715	#NUM!
sp|P07900|HS90A_HUMANHeatshockproteinHSP90-alphaOS=HomosapiensGN=HSP90AA1PE=1SV=5;tr|G3V2J8|G3V2J8_HUMANHeatshockproteinHSP90-alpha(Fragment)OS=HomosapiensGN=HSP90AA1PE=1SV=1;sp|Q14568|HS902_HUMANHeatshockproteinHSP90-alphaA2OS=HomosapiensGN=HSP90AA2PPE=1SV=2;sp|Q58FG0|HS905_HUMANPutativeheatshockproteinHSP90-alphaA5OS=HomosapiensGN=HSP90AA5PPE=2SV=1;sp|Q58FF6|H90B4_HUMANPutativeheatshockproteinH…	1310600000	1390000000	211070000	2401500000	29631000	675360000	437670000	520100000	1178700000	709590000	0.152694	0.671391
tr|H7BZK2|H7BZK2_HUMANTransientreceptorpotentialcationchannelsubfamilyVmember2(Fragment)OS=HomosapiensGN=TRPV2PE=1SV=1;sp|Q9Y5S1|TRPV2_HUMANTransientreceptorpotentialcationchannelsubfamilyVmember2OS=HomosapiensGN=TRPV2PE=1SV=1	1	5169500	1	6484700	1	1	1	4711600	1	1	-0.0858386	#NUM!
tr|C9K025|C9K025_HUMAN60SribosomalproteinL35a(Fragment)OS=HomosapiensGN=RPL35APE=1SV=1;sp|P18077|RL35A_HUMAN60SribosomalproteinL35aOS=HomosapiensGN=RPL35APE=1SV=2;tr|F8WBS5|F8WBS5_HUMAN60SribosomalproteinL35aOS=HomosapiensGN=RPL35APE=1SV=1;tr|F8WB72|F8WB72_HUMAN60SribosomalproteinL35aOS=HomosapiensGN=RPL35APE=1SV=1	3806000	1	2958500	1	1	4157200	1	1	8542700	1409500	-0.0977985	#NUM!
sp|P02774|VTDB_HUMANVitaminD-bindingproteinOS=HomosapiensGN=GCPE=1SV=1;tr|D6RF35|D6RF35_HUMANVitaminD-bindingproteinOS=HomosapiensGN=GCPE=1SV=1;tr|D6RBJ7|D6RBJ7_HUMANVitaminD-bindingproteinOS=HomosapiensGN=GCPE=1SV=1;tr|D6RF20|D6RF20_HUMANVitaminD-bindingprotein(Fragment)OS=HomosapiensGN=GCPE=1SV=1;CON__Q3MHN5;CON__ENSEMBL:ENSBTAP00000018229	25463000	8210000	269320000	7319200	1	19440000	1	63083000	6823400	7132900	-0.287267	#NUM!
sp|P02765|FETUA_HUMANAlpha-2-HS-glycoproteinOS=HomosapiensGN=AHSGPE=1SV=1;tr|C9JV77|C9JV77_HUMANAlpha-2-HS-glycoproteinOS=HomosapiensGN=AHSGPE=1SV=1;CON__P12763	112710000	100770000	384890000	59515000	1	138490000	109610000	8039000	72778000	47431000	-0.298226	#NUM!
tr|K7EMV3|K7EMV3_HUMANHistoneH3OS=HomosapiensGN=H3F3BPE=1SV=1;tr|B4DEB1|B4DEB1_HUMANHistoneH3OS=HomosapiensGN=H3F3APE=1SV=1;tr|K7EK07|K7EK07_HUMANHistoneH3(Fragment)OS=HomosapiensGN=H3F3BPE=1SV=1;sp|Q71DI3|H32_HUMANHistoneH3.2OS=HomosapiensGN=HIST2H3APE=1SV=3;sp|Q16695|H31T_HUMANHistoneH3.1tOS=HomosapiensGN=HIST3H3PE=1SV=3;sp|P84243|H33_HUMANHistoneH3.3OS=HomosapiensGN=H3F3APE=1SV=2;sp|P68431|H31…	1652700000	935820000	446940000	2077400000	203550000	44607000	51681000	2640900000	61180000	857070	0.167757	0.640655
sp|Q0VD83|APOBR_HUMANApolipoproteinBreceptorOS=HomosapiensGN=APOBRPE=1SV=2	1	1	1	3735600	1	1	721890	1	1	1	0.195457	0.585371
sp|P18669|PGAM1_HUMANPhosphoglyceratemutase1OS=HomosapiensGN=PGAM1PE=1SV=2;sp|P15259|PGAM2_HUMANPhosphoglyceratemutase2OS=HomosapiensGN=PGAM2PE=1SV=3;sp|Q8N0Y7|PGAM4_HUMANProbablephosphoglyceratemutase4OS=HomosapiensGN=PGAM4PE=3SV=1	39036000	50750000	8165900	76288000	1	86707000	25730000	2073900	104730000	48178000	-0.151906	#NUM!
sp|P17066|HSP76_HUMANHeatshock70kDaprotein6OS=HomosapiensGN=HSPA6PE=1SV=2;sp|P48741|HSP77_HUMANPutativeheatshock70kDaprotein7OS=HomosapiensGN=HSPA7PE=5SV=2	9420100	69105000	10286000	62352000	1	8856700	22344000	40470000	349860000	1	-0.206949	#NUM!
sp|P19827|ITIH1_HUMANInter-alpha-trypsininhibitorheavychainH1OS=HomosapiensGN=ITIH1PE=1SV=3;tr|F8WAS2|F8WAS2_HUMANInter-alpha-trypsininhibitorheavychainH1OS=HomosapiensGN=ITIH1PE=1SV=1;tr|H7C0N0|H7C0N0_HUMANInter-alpha-trypsininhibitorheavychainH1(Fragment)OS=HomosapiensGN=ITIH1PE=1SV=1;CON__Q0VCM5;tr|H7C5I0|H7C5I0_HUMANInter-alpha-trypsininhibitorheavychainH1(Fragment)OS=HomosapiensGN=ITIH1PE=1S…	2488800	1021500	384020000	1195900	1	5566600	10595000	51510000	1939600	14581000	-0.303169	#NUM!
sp|P01024|CO3_HUMANComplementC3OS=HomosapiensGN=C3PE=1SV=2;tr|M0QYC8|M0QYC8_HUMANComplementC3(Fragment)OS=HomosapiensGN=C3PE=1SV=1;CON__Q2UVX4;tr|M0QXZ3|M0QXZ3_HUMANComplementC3(Fragment)OS=HomosapiensGN=C3PE=1SV=1;tr|M0R1Q1|M0R1Q1_HUMANComplementC3(Fragment)OS=HomosapiensGN=C3PE=1SV=1;tr|M0R0Q9|M0R0Q9_HUMANComplementC3(Fragment)OS=HomosapiensGN=C3PE=1SV=1;sp|O95568|MET18_HUMANHistidineproteinmet…	1669000000	6776400000	12424000000	5489100000	105940000	5717900000	6615200000	1727700000	7688700000	18547000000	-0.588767	#NUM!
sp|P49913|CAMP_HUMANCathelicidinantimicrobialpeptideOS=HomosapiensGN=CAMPPE=1SV=1;tr|J3KNB4|J3KNB4_HUMANCathelicidinantimicrobialpeptideOS=HomosapiensGN=CAMPPE=1SV=1	103280000	25857000	6157000	15805000	542410000	15016000	3447600	2628500000	92727000	14631000	-0.134388	#NUM!
sp|P01599|KV117_HUMANImmunoglobulinkappavariable1-17OS=HomosapiensGN=IGKV1-17PE=1SV=2;sp|A0A0C4DH72|KV106_HUMANImmunoglobulinkappavariable1-6OS=HomosapiensGN=IGKV1-6PE=3SV=1	1	8696400	77709000	1	1	1	1	1	13282000	13101000	-0.34195	#NUM!
sp|P21695|GPDA_HUMANGlycerol-3-phosphatedehydrogenase[NAD(+)],cytoplasmicOS=HomosapiensGN=GPD1PE=1SV=4	10669000	54124000	16331000	182700000	44725000	114060000	9573400	27609000	362650000	69749000	-0.106622	#NUM!
sp|P62851|RS25_HUMAN40SribosomalproteinS25OS=HomosapiensGN=RPS25PE=1SV=1	11240000	1	1	3758600	1	1	1	1	5551000	1	0.532782	0.105304
tr|H3BNE1|H3BNE1_HUMANSynaptosomal-associatedprotein23OS=HomosapiensGN=SNAP23PE=1SV=1;tr|H3BR18|H3BR18_HUMANSynaptosomal-associatedprotein(Fragment)OS=HomosapiensGN=SNAP23PE=1SV=1;tr|H3BM38|H3BM38_HUMANSynaptosomal-associatedprotein(Fragment)OS=HomosapiensGN=SNAP23PE=1SV=1;tr|H3BPJ0|H3BPJ0_HUMANSynaptosomal-associatedprotein23OS=HomosapiensGN=SNAP23PE=1SV=1;sp|O00161|SNP23_HUMANSynaptosomal-assoc…	20727000	20232000	1	107850000	13123000	31218000	1	36851000	3811400	10782000	0.239427	0.501391
tr|K7EKM4|K7EKM4_HUMANSpermidinesynthaseOS=HomosapiensGN=SRMPE=1SV=1;sp|P19623|SPEE_HUMANSpermidinesynthaseOS=HomosapiensGN=SRMPE=1SV=1	1	1	1	1	6891800	1	1	613450	925480	1	0.607013	0.0560672
sp|Q92625|ANS1A_HUMANAnkyrinrepeatandSAMdomain-containingprotein1AOS=HomosapiensGN=ANKS1APE=1SV=4	1	1	1	1	5838600	1	1	1	1256200	1	0.61108	0.0539251
sp|Q14019|COTL1_HUMANCoactosin-likeproteinOS=HomosapiensGN=COTL1PE=1SV=3;tr|H3BT58|H3BT58_HUMANCoactosin-likeproteinOS=HomosapiensGN=COTL1PE=1SV=1	58953000	38096000	7895200	255710000	22064000	24731000	19293000	25504000	100230000	28962000	0.261467	0.461264
sp|P43034|LIS1_HUMANPlatelet-activatingfactoracetylhydrolaseIBsubunitalphaOS=HomosapiensGN=PAFAH1B1PE=1SV=2;tr|I3L3N5|I3L3N5_HUMANPlatelet-activatingfactoracetylhydrolaseIBsubunitalpha(Fragment)OS=HomosapiensGN=PAFAH1B1PE=1SV=1	1	1	1	1	27309000	15721000	31796000	6988200	2927200	1	0.165817	0.644588
tr|G3V1Q4|G3V1Q4_HUMANSeptin-7OS=HomosapiensGN=SEPT7PE=1SV=2;tr|E7ES33|E7ES33_HUMANSeptin-7OS=HomosapiensGN=SEPT7PE=1SV=3;tr|E7EPK1|E7EPK1_HUMANSeptin-7OS=HomosapiensGN=SEPT7PE=1SV=2;sp|Q16181|SEPT7_HUMANSeptin-7OS=HomosapiensGN=SEPT7PE=1SV=2;tr|A0A0U1RRE1|A0A0U1RRE1_HUMANSeptin-7(Fragment)OS=HomosapiensGN=SEPT7PE=1SV=1;tr|Q5JXL7|Q5JXL7_HUMANSeptin-7OS=HomosapiensGN=DKFZp586I031PE=1SV=1;tr|A0A0U1…	28492000	4174900	1	18982000	1	9709700	8671200	1246600	5618700	3827600	0.504352	0.129537
sp|P02751|FINC_HUMANFibronectinOS=HomosapiensGN=FN1PE=1SV=4;tr|H0Y7Z1|H0Y7Z1_HUMANFibronectin(Fragment)OS=HomosapiensGN=FN1PE=1SV=1	30648000	25271000	3844600000	66542000	7212300	379000000	22314000	366300000	173100000	122110000	-0.303335	#NUM!
sp|Q14204|DYHC1_HUMANCytoplasmicdynein1heavychain1OS=HomosapiensGN=DYNC1H1PE=1SV=5;tr|H0YJ21|H0YJ21_HUMANCytoplasmicdynein1heavychain1(Fragment)OS=HomosapiensGN=DYNC1H1PE=1SV=1	162940000	47914000	16996000	168000000	14533000	206190000	11073000	305160000	129990000	10305000	-0.0355123	#NUM!
sp|P84095|RHOG_HUMANRho-relatedGTP-bindingproteinRhoGOS=HomosapiensGN=RHOGPE=1SV=1	98470000	30221000	7056600	35824000	1	10919000	23297000	30621000	16866000	22800000	0.397512	0.248537
sp|P08311|CATG_HUMANCathepsinGOS=HomosapiensGN=CTSGPE=1SV=2	110830000	25477000	5531200	30250000	495620000	22258000	67806000	1772000000	117730000	30272000	-0.088524	#NUM!
sp|P07195|LDHB_HUMANL-lactatedehydrogenaseBchainOS=HomosapiensGN=LDHBPE=1SV=2;tr|A8MW50|A8MW50_HUMANL-lactatedehydrogenase(Fragment)OS=HomosapiensGN=LDHBPE=1SV=1;tr|C9J7H8|C9J7H8_HUMANL-lactatedehydrogenaseBchain(Fragment)OS=HomosapiensGN=LDHBPE=1SV=8;tr|F5H793|F5H793_HUMANL-lactatedehydrogenaseBchain(Fragment)OS=HomosapiensGN=LDHBPE=1SV=1;tr|F5H5G7|F5H5G7_HUMANL-lactatedehydrogenaseOS=Homosapien…	228620000	761620000	38392000	692980000	14767000	144180000	217330000	175380000	352520000	229170000	-0.08686	#NUM!
sp|Q99879|H2B1M_HUMANHistoneH2Btype1-MOS=HomosapiensGN=HIST1H2BMPE=1SV=3;sp|Q99877|H2B1N_HUMANHistoneH2Btype1-NOS=HomosapiensGN=HIST1H2BNPE=1SV=3;sp|Q93079|H2B1H_HUMANHistoneH2Btype1-HOS=HomosapiensGN=HIST1H2BHPE=1SV=3;sp|Q5QNW6|H2B2F_HUMANHistoneH2Btype2-FOS=HomosapiensGN=HIST2H2BFPE=1SV=3;sp|P62807|H2B1C_HUMANHistoneH2Btype1-C/E/F/G/IOS=HomosapiensGN=HIST1H2BCPE=1SV=4;sp|P58876|H2B1D_HUMANHisto…	111340000	169770000	33609000	286690000	1225200000	293800000	82575000	4115600000	218580000	186020000	-0.101335	#NUM!
tr|D6RG15|D6RG15_HUMANTwinfilin-2OS=HomosapiensGN=TWF2PE=1SV=1;sp|Q6IBS0|TWF2_HUMANTwinfilin-2OS=HomosapiensGN=TWF2PE=1SV=2;tr|F8W645|F8W645_HUMANTwinfilin-1(Fragment)OS=HomosapiensGN=TWF1PE=1SV=1;tr|F8W1Q9|F8W1Q9_HUMANTwinfilin-1(Fragment)OS=HomosapiensGN=TWF1PE=1SV=8;tr|H0Y858|H0Y858_HUMANUncharacterizedprotein(Fragment)OS=HomosapiensPE=4SV=1	1	5312000	1	2782400	1	1	1	8388900	8452200	1	-0.355055	#NUM!
sp|P22314|UBA1_HUMANUbiquitin-likemodifier-activatingenzyme1OS=HomosapiensGN=UBA1PE=1SV=3;tr|Q5JRR6|Q5JRR6_HUMANUbiquitin-likemodifier-activatingenzyme1OS=HomosapiensGN=UBA1PE=1SV=1;tr|Q5JRR9|Q5JRR9_HUMANUbiquitin-likemodifier-activatingenzyme1(Fragment)OS=HomosapiensGN=UBA1PE=1SV=8;tr|Q5JRS0|Q5JRS0_HUMANUbiquitin-likemodifier-activatingenzyme1(Fragment)OS=HomosapiensGN=UBA1PE=1SV=1;tr|Q5JRS1|Q5J…	22432000	22721000	5903400	110670000	10101000	22002000	25178000	69622000	56814000	84408000	-0.150796	#NUM!
sp|Q06830|PRDX1_HUMANPeroxiredoxin-1OS=HomosapiensGN=PRDX1PE=1SV=1;tr|A0A0A0MSI0|A0A0A0MSI0_HUMANPeroxiredoxin-1(Fragment)OS=HomosapiensGN=PRDX1PE=1SV=1;tr|A0A0A0MRQ5|A0A0A0MRQ5_HUMANPeroxiredoxin-1OS=HomosapiensGN=PRDX1PE=1SV=1	81733000	599430000	109640000	316910000	278270000	204800000	66664000	130970000	470550000	64715000	-0.00999599	#NUM!
sp|P10606|COX5B_HUMANCytochromecoxidasesubunit5B,mitochondrialOS=HomosapiensGN=COX5BPE=1SV=2	1	1	1	1	7116100	1	1	1	1637000	1	0.607641	0.0557325
sp|Q13938|CAYP1_HUMANCalcyphosinOS=HomosapiensGN=CAPSPE=1SV=1;tr|K7EL21|K7EL21_HUMANCalcyphosinOS=HomosapiensGN=CAPSPE=1SV=1;tr|K7ES72|K7ES72_HUMANCalcyphosin(Fragment)OS=HomosapiensGN=CAPSPE=1SV=2;tr|A0A0X1KG78|A0A0X1KG78_HUMANCalcyphosinOS=HomosapiensGN=CAPSPE=1SV=1	111370000	262740000	1	117630000	154020000	151930000	146510000	14402000	68603000	79129000	0.239158	0.50189
sp|Q9Y4E8|UBP15_HUMANUbiquitincarboxyl-terminalhydrolase15OS=HomosapiensGN=USP15PE=1SV=3;tr|F8VVY7|F8VVY7_HUMANUbiquitincarboxyl-terminalhydrolase15(Fragment)OS=HomosapiensGN=USP15PE=1SV=1;tr|F8VZG8|F8VZG8_HUMANUbiquitincarboxyl-terminalhydrolase15(Fragment)OS=HomosapiensGN=USP15PE=1SV=8;tr|F8W0H4|F8W0H4_HUMANUbiquitincarboxyl-terminalhydrolase15(Fragment)OS=HomosapiensGN=USP15PE=1SV=1;tr|H0YI31|…	1	1	1	1	6984900	1756000	1	9992700	3933700	1	0.0732811	0.839534
sp|Q8WVY7|UBCP1_HUMANUbiquitin-likedomain-containingCTDphosphatase1OS=HomosapiensGN=UBLCP1PE=1SV=2	1	6188000	1	5940400	1	1	1	5307500	1	1	-0.135092	#NUM!
sp|P16152|CBR1_HUMANCarbonylreductase[NADPH]1OS=HomosapiensGN=CBR1PE=1SV=3;tr|E9PQ63|E9PQ63_HUMANCarbonylreductase[NADPH]1OS=HomosapiensGN=CBR1PE=1SV=1;tr|A8MTM1|A8MTM1_HUMANCarbonylreductase[NADPH]1OS=HomosapiensGN=CBR1PE=1SV=1	19107000	24086000	10015000	44479000	1	19667000	23985000	18434000	30045000	36055000	-0.292467	#NUM!
sp|Q15185|TEBP_HUMANProstaglandinEsynthase3OS=HomosapiensGN=PTGES3PE=1SV=1;tr|A0A087WYT3|A0A087WYT3_HUMANProstaglandinEsynthase3OS=HomosapiensGN=PTGES3PE=1SV=1;tr|B4DDC6|B4DDC6_HUMANProstaglandinEsynthase3OS=HomosapiensGN=PTGES3PE=1SV=1	4817300	8247800	5657100	10242000	14051000	16238000	1	7733000	64724000	1	-0.0617903	#NUM!
tr|H0YLP6|H0YLP6_HUMAN60SribosomalproteinL28OS=HomosapiensGN=RPL28PE=1SV=1;tr|H0YMF4|H0YMF4_HUMAN60SribosomalproteinL28OS=HomosapiensGN=RPL28PE=1SV=1;sp|P46779|RL28_HUMAN60SribosomalproteinL28OS=HomosapiensGN=RPL28PE=1SV=3;tr|H0YKD8|H0YKD8_HUMAN60SribosomalproteinL28OS=HomosapiensGN=RPL28PE=1SV=1	1	1	1699500	974570	1	1	1	10849000	1	1	-0.300378	#NUM!
sp|P01011|AACT_HUMANAlpha-1-antichymotrypsinOS=HomosapiensGN=SERPINA3PE=1SV=2;tr|G3V3A0|G3V3A0_HUMANAlpha-1-antichymotrypsinOS=HomosapiensGN=SERPINA3PE=1SV=1;tr|G3V595|G3V595_HUMANAlpha-1-antichymotrypsin(Fragment)OS=HomosapiensGN=SERPINA3PE=1SV=3;tr|A0A087WY93|A0A087WY93_HUMANAlpha-1-antichymotrypsin(Fragment)OS=HomosapiensGN=SERPINA3PE=1SV=1	16583000	13885000	446800000	72364000	14547000	7282900	48722000	278190000	471680000	198310000	-0.498906	#NUM!
sp|Q9BR76|COR1B_HUMANCoronin-1BOS=HomosapiensGN=CORO1BPE=1SV=1;tr|A0A087WW53|A0A087WW53_HUMANCoroninOS=HomosapiensGN=CORO1BPE=1SV=1;tr|F5H390|F5H390_HUMANCoroninOS=HomosapiensGN=CORO1BPE=1SV=1;tr|F5H0D2|F5H0D2_HUMANCoronin(Fragment)OS=HomosapiensGN=CORO1BPE=1SV=2	8015600	10712000	2020600	20065000	1	21073000	6291700	10719000	23666000	1	-0.155131	#NUM!
tr|E7EVH9|E7EVH9_HUMANPseudouridine-5'-phosphatase(Fragment)OS=HomosapiensGN=PUDPPE=1SV=1;sp|Q08623|HDHD1_HUMANPseudouridine-5'-phosphataseOS=HomosapiensGN=PUDPPE=1SV=3	4909900	3641400	1	4188800	1	6996400	1	1	21585000	1	-0.0661268	#NUM!
sp|Q8WW22|DNJA4_HUMANDnaJhomologsubfamilyAmember4OS=HomosapiensGN=DNAJA4PE=1SV=1;tr|F8WF76|F8WF76_HUMANDnaJhomologsubfamilyAmember4OS=HomosapiensGN=DNAJA4PE=1SV=1;tr|C9JDE6|C9JDE6_HUMANDnaJhomologsubfamilyAmember4OS=HomosapiensGN=DNAJA4PE=1SV=2;tr|F5H170|F5H170_HUMANDnaJhomologsubfamilyAmember4OS=HomosapiensGN=DNAJA4PE=1SV=1	1	8761300	1	1	1	1	1	1	2180900	1	-0.220378	#NUM!
sp|P53621|COPA_HUMANCoatomersubunitalphaOS=HomosapiensGN=COPAPE=1SV=2	3300400	1	849270	9044200	1	1	1	50558000	1	1	-0.206508	#NUM!
tr|C9IZ80|C9IZ80_HUMANBasicleucinezipperandW2domain-containingprotein1(Fragment)OS=HomosapiensGN=BZW1PE=1SV=1;sp|Q7L1Q6|BZW1_HUMANBasicleucinezipperandW2domain-containingprotein1OS=HomosapiensGN=BZW1PE=1SV=1;tr|H0Y503|H0Y503_HUMANBasicleucinezipperandW2domain-containingprotein1(Fragment)OS=HomosapiensGN=BZW1PE=1SV=1;tr|C9JFN4|C9JFN4_HUMANBasicleucinezipperandW2domain-containingprotein1(Fragment)O…	1	4453900	1	2219800	1	1	1	1	2833200	1	-0.144972	#NUM!
sp|P02787|TRFE_HUMANSerotransferrinOS=HomosapiensGN=TFPE=1SV=3;tr|H7C5E8|H7C5E8_HUMANSerotransferrin(Fragment)OS=HomosapiensGN=TFPE=1SV=1;tr|C9JVG0|C9JVG0_HUMANSerotransferrin(Fragment)OS=HomosapiensGN=TFPE=1SV=1;tr|F8WEK9|F8WEK9_HUMANSerotransferrinOS=HomosapiensGN=TFPE=1SV=1;tr|F8WCI6|F8WCI6_HUMANSerotransferrinOS=HomosapiensGN=TFPE=1SV=1;tr|C9JB55|C9JB55_HUMANSerotransferrin(Fragment)OS=Homosa…	807830000	115960000	8927500000	174310000	30890000	71331000	174740000	208170000	1192800000	1961000000	-0.284786	#NUM!
sp|P03973|SLPI_HUMANAntileukoproteinaseOS=HomosapiensGN=SLPIPE=1SV=2	157290000	161950000	4572500	112580000	1	2782300	1	868060000	180780000	1740100	-0.223587	#NUM!
tr|E7EVV3|E7EVV3_HUMANMitochondria-eatingproteinOS=HomosapiensGN=SPATA18PE=1SV=1;sp|Q8TC71|MIEAP_HUMANMitochondria-eatingproteinOS=HomosapiensGN=SPATA18PE=1SV=1	1	1	1	1	48588000	8054300	1	5116700	1	1	0.600446	0.0596424
sp|P48444|COPD_HUMANCoatomersubunitdeltaOS=HomosapiensGN=ARCN1PE=1SV=1;tr|B0YIW6|B0YIW6_HUMANArchain1,isoformCRA_aOS=HomosapiensGN=ARCN1PE=1SV=1;tr|Q6P1Q5|Q6P1Q5_HUMANCoatomersubunitdeltaOS=HomosapiensGN=ARCN1PE=1SV=1;tr|E9PK34|E9PK34_HUMANCoatomersubunitdeltaOS=HomosapiensGN=ARCN1PE=1SV=1	11477000	15627000	2984100	21244000	1	19707000	1	14885000	10761000	27386000	-0.242102	#NUM!
sp|P07357|CO8A_HUMANComplementcomponentC8alphachainOS=HomosapiensGN=C8APE=1SV=2	1	2907800	69385000	3869300	1	6283600	1	5630800	10617000	5178500	-0.333557	#NUM!
sp|P39019|RS19_HUMAN40SribosomalproteinS19OS=HomosapiensGN=RPS19PE=1SV=2;tr|A0A075B6E2|A0A075B6E2_HUMAN40SribosomalproteinS19OS=HomosapiensGN=RPS19PE=1SV=1;tr|M0R2L9|M0R2L9_HUMAN40SribosomalproteinS19(Fragment)OS=HomosapiensGN=RPS19PE=1SV=1;tr|M0QXK4|M0QXK4_HUMAN40SribosomalproteinS19(Fragment)OS=HomosapiensGN=RPS19PE=1SV=1;tr|M0QYF7|M0QYF7_HUMAN40SribosomalproteinS19(Fragment)OS=HomosapiensGN=RP…	3233200	2349700	21804000	2979300	1	8378900	1	1	6468100	1	-0.259112	#NUM!
sp|O96009|NAPSA_HUMANNapsin-AOS=HomosapiensGN=NAPSAPE=1SV=1;tr|M0QXC5|M0QXC5_HUMANNapsin-A(Fragment)OS=HomosapiensGN=NAPSAPE=1SV=1	411060000	336910000	10291000	179250000	51998000	385660000	110920000	25352000	173110000	932140000	-0.0942567	#NUM!
sp|P01009|A1AT_HUMANAlpha-1-antitrypsinOS=HomosapiensGN=SERPINA1PE=1SV=3;tr|G3V2B9|G3V2B9_HUMANAlpha-1-antitrypsin(Fragment)OS=HomosapiensGN=SERPINA1PE=1SV=1;tr|G3V544|G3V544_HUMANAlpha-1-antitrypsin(Fragment)OS=HomosapiensGN=SERPINA1PE=1SV=1;tr|G3V5R8|G3V5R8_HUMANAlpha-1-antitrypsin(Fragment)OS=HomosapiensGN=SERPINA1PE=1SV=1;tr|G3V387|G3V387_HUMANAlpha-1-antitrypsin(Fragment)OS=HomosapiensGN=SER…	881980000	2730800000	3317500000	1737700000	1	1163600000	2018100000	242040000	1954100000	9551800000	-0.415095	#NUM!
sp|O75083|WDR1_HUMANWDrepeat-containingprotein1OS=HomosapiensGN=WDR1PE=1SV=4;tr|D6RD66|D6RD66_HUMANWDrepeat-containingprotein1(Fragment)OS=HomosapiensGN=WDR1PE=1SV=1	352580000	133350000	17864000	246000000	1	59204000	25140000	87045000	114230000	205610000	0.350814	0.314252
sp|P08238|HS90B_HUMANHeatshockproteinHSP90-betaOS=HomosapiensGN=HSP90AB1PE=1SV=4;sp|Q58FF7|H90B3_HUMANPutativeheatshockproteinHSP90-beta-3OS=HomosapiensGN=HSP90AB3PPE=5SV=1;sp|Q58FF8|H90B2_HUMANPutativeheatshockproteinHSP90-beta2OS=HomosapiensGN=HSP90AB2PPE=1SV=2;tr|F8W026|F8W026_HUMANEndoplasmin(Fragment)OS=HomosapiensGN=HSP90B1PE=1SV=8	262800000	228490000	40039000	332080000	25162000	142400000	38670000	48576000	168140000	238740000	0.194595	0.587065
sp|P04003|C4BPA_HUMANC4b-bindingproteinalphachainOS=HomosapiensGN=C4BPAPE=1SV=2;tr|A6PVY5|A6PVY5_HUMANC4b-bindingproteinalphachain(Fragment)OS=HomosapiensGN=C4BPAPE=1SV=1;tr|F2Z2V7|F2Z2V7_HUMANC4b-bindingproteinalphachainOS=HomosapiensGN=C4BPAPE=1SV=1	9572600	4333600	2309600000	5714600	1	24657000	13272000	534620000	83270000	29775000	-0.323292	#NUM!
sp|P16050|LOX15_HUMANArachidonate15-lipoxygenaseOS=HomosapiensGN=ALOX15PE=1SV=3	117930000	39585000	4925400	182820000	1	39611000	66370000	45618000	30782000	37711000	0.320541	0.361069
tr|K7ERI9|K7ERI9_HUMANApolipoproteinC-I(Fragment)OS=HomosapiensGN=APOC1PE=1SV=1;sp|P02654|APOC1_HUMANApolipoproteinC-IOS=HomosapiensGN=APOC1PE=1SV=1;tr|K7EKP1|K7EKP1_HUMANApolipoproteinC-I(Fragment)OS=HomosapiensGN=APOC1PE=1SV=8;tr|K7EJI9|K7EJI9_HUMANApolipoproteinC-IOS=HomosapiensGN=APOC1PE=1SV=1;tr|K7ELM9|K7ELM9_HUMANApolipoproteinC-IOS=HomosapiensGN=APOC1PE=1SV=1;tr|K7EPF9|K7EPF9_HUMANApolipop…	19378000	106570000	123050000	45325000	1	32622000	21306000	1	124300000	1	-0.353865	#NUM!
sp|Q15075|EEA1_HUMANEarlyendosomeantigen1OS=HomosapiensGN=EEA1PE=1SV=2	5831600	1	1	3130900	1	1	1585100	5491000	9475100	1	0.0615958	0.864916
sp|P04229|2B11_HUMANHLAclassIIhistocompatibilityantigen,DRB1-1betachainOS=HomosapiensGN=HLA-DRB1PE=1SV=2;sp|Q29974|2B1G_HUMANHLAclassIIhistocompatibilityantigen,DRB1-16betachainOS=HomosapiensGN=HLA-DRB1PE=1SV=1;sp|P13760|2B14_HUMANHLAclassIIhistocompatibilityantigen,DRB1-4betachainOS=HomosapiensGN=HLA-DRB1PE=1SV=1;sp|Q30154|DRB5_HUMANHLAclassIIhistocompatibilityantigen,DRbeta5chainOS=HomosapiensG…	14171000	218900000	5334200	147390000	1	80906000	1645900	47836000	78299000	11409000	-0.167414	#NUM!
sp|P16422|EPCAM_HUMANEpithelialcelladhesionmoleculeOS=HomosapiensGN=EPCAMPE=1SV=2;tr|B5MCA4|B5MCA4_HUMANEpithelialcelladhesionmoleculeOS=HomosapiensGN=EPCAMPE=1SV=1;tr|C9JKY3|C9JKY3_HUMANEpithelialcelladhesionmolecule(Fragment)OS=HomosapiensGN=EPCAMPE=1SV=1	1	1	1	1	237280	832700	1	1	1	1	0.0412903	0.909264
tr|B8ZZU8|B8ZZU8_HUMANElongin-BOS=HomosapiensGN=ELOBPE=1SV=1;sp|Q15370|ELOB_HUMANElongin-BOS=HomosapiensGN=ELOBPE=1SV=1;tr|I3L0M9|I3L0M9_HUMANElongin-B(Fragment)OS=HomosapiensGN=ELOBPE=1SV=1;tr|A0A0B4J296|A0A0B4J296_HUMANElongin-BOS=HomosapiensGN=ELOBPE=1SV=1	1	1	1	2000800	1	1	1	6949700	1	1	-0.209384	#NUM!
sp|Q8N4P2|TT30B_HUMANTetratricopeptiderepeatprotein30BOS=HomosapiensGN=TTC30BPE=1SV=2;sp|Q86WT1|TT30A_HUMANTetratricopeptiderepeatprotein30AOS=HomosapiensGN=TTC30APE=1SV=3	5103900	1	1	1933600	1	1	1	3057600	1	1	0.442285	0.193279
tr|E5RHW4|E5RHW4_HUMANErlin-2(Fragment)OS=HomosapiensGN=ERLIN2PE=1SV=1;sp|O94905|ERLN2_HUMANErlin-2OS=HomosapiensGN=ERLIN2PE=1SV=1;tr|E5RJ09|E5RJ09_HUMANErlin-2(Fragment)OS=HomosapiensGN=ERLIN2PE=1SV=1;tr|B0QZ43|B0QZ43_HUMANErlin-1(Fragment)OS=HomosapiensGN=ERLIN1PE=1SV=1;sp|O75477|ERLN1_HUMANErlin-1OS=HomosapiensGN=ERLIN1PE=1SV=1	9417700	5453800	1	10571000	1	1	1	13515000	1	1	0.181536	0.612945
sp|P05362|ICAM1_HUMANIntercellularadhesionmolecule1OS=HomosapiensGN=ICAM1PE=1SV=2;tr|K7EKL8|K7EKL8_HUMANIntercellularadhesionmolecule1(Fragment)OS=HomosapiensGN=ICAM1PE=1SV=1;tr|E7ESS4|E7ESS4_HUMANIntercellularadhesionmolecule1OS=HomosapiensGN=ICAM1PE=1SV=1	12835000	54733000	23323000	48194000	1	83821000	1	18751000	21817000	83522000	-0.374802	#NUM!
sp|P04899|GNAI2_HUMANGuaninenucleotide-bindingproteinG(i)subunitalpha-2OS=HomosapiensGN=GNAI2PE=1SV=3	269330000	176870000	10936000	179550000	1	62996000	72881000	235970000	18032000	25489000	0.195321	0.585637
sp|P29401|TKT_HUMANTransketolaseOS=HomosapiensGN=TKTPE=1SV=3;tr|A0A0B4J1R6|A0A0B4J1R6_HUMANTransketolaseOS=HomosapiensGN=TKTPE=1SV=1;tr|E9PFF2|E9PFF2_HUMANTransketolaseOS=HomosapiensGN=TKTPE=1SV=1;tr|F8W888|F8W888_HUMANTransketolaseOS=HomosapiensGN=TKTPE=1SV=1;tr|F8WAX4|F8WAX4_HUMANTransketolaseOS=HomosapiensGN=TKTPE=1SV=1	215670000	509320000	35662000	276050000	250060000	190460000	44708000	111340000	191320000	418450000	0.110542	0.759539
sp|Q9UM07|PADI4_HUMANProtein-argininedeiminasetype-4OS=HomosapiensGN=PADI4PE=1SV=2;tr|B1AQ67|B1AQ67_HUMANProtein-argininedeiminasetype-4OS=HomosapiensGN=PADI4PE=1SV=1	1	1	1	1	33547000	1	1	110620000	1	1	-0.082133	#NUM!
sp|Q14624|ITIH4_HUMANInter-alpha-trypsininhibitorheavychainH4OS=HomosapiensGN=ITIH4PE=1SV=4;tr|B7ZKJ8|B7ZKJ8_HUMANITIH4proteinOS=HomosapiensGN=ITIH4PE=1SV=1;tr|H7C0L5|H7C0L5_HUMANInter-alpha-trypsininhibitorheavychainH4(Fragment)OS=HomosapiensGN=ITIH4PE=1SV=1;CON__Q3T052	1145700	1	507330000	908500	1071800	3010200	8154800	17428000	134060000	1390700	-0.302325	#NUM!
tr|K7ENJ0|K7ENJ0_HUMANUVexcisionrepairproteinRAD23homologAOS=HomosapiensGN=RAD23APE=1SV=1;tr|K7ELW1|K7ELW1_HUMANUVexcisionrepairproteinRAD23homologAOS=HomosapiensGN=RAD23APE=1SV=1;tr|Q5W0S5|Q5W0S5_HUMANUVexcisionrepairproteinRAD23homologB(Fragment)OS=HomosapiensGN=RAD23BPE=1SV=1;sp|P54725|RD23A_HUMANUVexcisionrepairproteinRAD23homologAOS=HomosapiensGN=RAD23APE=1SV=1;sp|P54727|RD23B_HUMANUVexcisio…	1	760370	555000	1	1	1014800	1	1	1	1454100	-0.444861	#NUM!
tr|H7C3G9|H7C3G9_HUMANN-acetyl-D-glucosaminekinaseOS=HomosapiensGN=NAGKPE=1SV=2;sp|Q9UJ70|NAGK_HUMANN-acetyl-D-glucosaminekinaseOS=HomosapiensGN=NAGKPE=1SV=4;tr|E9PPU6|E9PPU6_HUMANN-acetyl-D-glucosaminekinase(Fragment)OS=HomosapiensGN=NAGKPE=1SV=2;tr|H7C286|H7C286_HUMANN-acetyl-D-glucosaminekinaseOS=HomosapiensGN=NAGKPE=1SV=2;tr|C9JEV6|C9JEV6_HUMANN-acetyl-D-glucosaminekinaseOS=HomosapiensGN=NAGK…	27699000	10165000	3339900	12703000	1	21346000	15006000	4053700	22941000	10093000	0.0955867	0.791451
sp|Q9Y266|NUDC_HUMANNuclearmigrationproteinnudCOS=HomosapiensGN=NUDCPE=1SV=1;tr|A0A0A0MSS4|A0A0A0MSS4_HUMANNuclearmigrationproteinnudC(Fragment)OS=HomosapiensGN=NUDCPE=1SV=1;tr|A0A0A0MSU9|A0A0A0MSU9_HUMANNuclearmigrationproteinnudC(Fragment)OS=HomosapiensGN=NUDCPE=1SV=1	1	1	1	1	26527000	53162000	1	2276800	5486500	2776600	0.133446	0.711281
sp|A0A0B4J1X5|HV374_HUMANImmunoglobulinheavyvariable3-74OS=HomosapiensGN=IGHV3-74PE=3SV=1;sp|A0A0J9YVY3|HV741_HUMANImmunoglobulinheavyvariable7-4-1OS=HomosapiensGN=IGHV7-4-1PE=3SV=1;tr|A0A075B7E8|A0A075B7E8_HUMANImmunoglobulinheavyvariable3/OR16-13(non-functional)(Fragment)OS=HomosapiensGN=IGHV3OR16-13PE=4SV=1	14270000	1	198280000	15932000	1	1	1	154860000	262830000	19788000	-0.406527	#NUM!
sp|P20160|CAP7_HUMANAzurocidinOS=HomosapiensGN=AZU1PE=1SV=3;tr|A0A087WXP0|A0A087WXP0_HUMANAzurocidinOS=HomosapiensGN=AZU1PE=1SV=1	37248000	48104000	1	38720000	155940000	1	1	717850000	25390000	1389700	-0.117774	#NUM!
sp|Q9H4A4|AMPB_HUMANAminopeptidaseBOS=HomosapiensGN=RNPEPPE=1SV=2;tr|A6NKB8|A6NKB8_HUMANAminopeptidaseBOS=HomosapiensGN=RNPEPPE=1SV=1;tr|C9JMZ3|C9JMZ3_HUMANAminopeptidaseB(Fragment)OS=HomosapiensGN=RNPEPPE=1SV=1;tr|A0A087WUS4|A0A087WUS4_HUMANAminopeptidaseB(Fragment)OS=HomosapiensGN=RNPEPPE=1SV=1;tr|A0A087WU27|A0A087WU27_HUMANAminopeptidaseB(Fragment)OS=HomosapiensGN=RNPEPPE=1SV=1	30217000	29551000	1	28855000	29721000	42829000	32509000	19647000	25436000	21205000	0.297767	0.398363
sp|Q9Y678|COPG1_HUMANCoatomersubunitgamma-1OS=HomosapiensGN=COPG1PE=1SV=1	5256700	1695500	2063700	7448700	1	5285800	1	1	30608000	1	-0.0616384	#NUM!
sp|P04040|CATA_HUMANCatalaseOS=HomosapiensGN=CATPE=1SV=3	37247000	37013000	1	11408000	55049000	38184000	1	191630000	28898000	1	-0.0604347	#NUM!
sp|P00568|KAD1_HUMANAdenylatekinaseisoenzyme1OS=HomosapiensGN=AK1PE=1SV=3;tr|Q5T9B7|Q5T9B7_HUMANAdenylatekinaseisoenzyme1OS=HomosapiensGN=AK1PE=1SV=1;tr|H0YID2|H0YID2_HUMANAdenylatekinaseisoenzyme1(Fragment)OS=HomosapiensGN=AK1PE=1SV=1;tr|H0Y4J6|H0Y4J6_HUMANAdenylatekinaseisoenzyme1(Fragment)OS=HomosapiensGN=AK1PE=1SV=1	15724000	16604000	1	27339000	1	6316800	12966000	9042600	55532000	9359900	-0.0958542	#NUM!
tr|D3DSM0|D3DSM0_HUMANIntegrinbetaOS=HomosapiensGN=ITGB2PE=1SV=1	38778000	113420000	4109100	37171000	522970000	29466000	1	277350000	35551000	33626000	0.477754	0.15502
sp|P62258|1433E_HUMAN14-3-3proteinepsilonOS=HomosapiensGN=YWHAEPE=1SV=1;tr|B4DJF2|B4DJF2_HUMAN14-3-3proteinepsilonOS=HomosapiensGN=YWHAEPE=1SV=1;tr|I3L3T1|I3L3T1_HUMAN14-3-3proteinepsilonOS=HomosapiensGN=YWHAEPE=1SV=1;tr|I3L0W5|I3L0W5_HUMAN14-3-3proteinepsilonOS=HomosapiensGN=YWHAEPE=1SV=1;tr|K7EM20|K7EM20_HUMAN14-3-3proteinepsilon(Fragment)OS=HomosapiensGN=YWHAEPE=1SV=1;tr|K7EIT4|K7EIT4_HUMAN14-…	154580000	98302000	11969000	105350000	1	80407000	28338000	213730000	179110000	21098000	-0.0798564	#NUM!
sp|P06312|KV401_HUMANImmunoglobulinkappavariable4-1OS=HomosapiensGN=IGKV4-1PE=1SV=1	5141800	17068000	166480000	30500000	1	20870000	1	115940000	146580000	64821000	-0.539264	#NUM!
sp|P07327|ADH1A_HUMANAlcoholdehydrogenase1AOS=HomosapiensGN=ADH1APE=1SV=2;sp|P00326|ADH1G_HUMANAlcoholdehydrogenase1COS=HomosapiensGN=ADH1CPE=1SV=2;tr|D6RHZ6|D6RHZ6_HUMANAlcoholdehydrogenase1BOS=HomosapiensGN=ADH1BPE=1SV=2;tr|V9HW50|V9HW50_HUMANAlcoholdehydrogenase1BOS=HomosapiensGN=HEL-S-117PE=1SV=1;sp|P00325|ADH1B_HUMANAlcoholdehydrogenase1BOS=HomosapiensGN=ADH1BPE=1SV=2;tr|A0A087WUC4|A0A087WUC…	25816000	3884500	860650	39624000	1	7565300	1	20184000	114300000	1	-0.0200915	#NUM!
tr|C9JZ20|C9JZ20_HUMANProhibitin(Fragment)OS=HomosapiensGN=PHBPE=1SV=1;tr|E7ESE2|E7ESE2_HUMANProhibitin(Fragment)OS=HomosapiensGN=PHBPE=1SV=2;tr|E9PCW0|E9PCW0_HUMANProhibitin(Fragment)OS=HomosapiensGN=PHBPE=1SV=2;tr|C9JW96|C9JW96_HUMANProhibitin(Fragment)OS=HomosapiensGN=PHBPE=1SV=2;sp|P35232|PHB_HUMANProhibitinOS=HomosapiensGN=PHBPE=1SV=1;tr|D6RBK0|D6RBK0_HUMANProhibitin(Fragment)OS=HomosapiensG…	8392600	6255600	3054800	27420000	1	3800900	6077900	5847400	12558000	782780	0.146934	0.683258
sp|O95833|CLIC3_HUMANChlorideintracellularchannelprotein3OS=HomosapiensGN=CLIC3PE=1SV=2	2313400	1946700	1	4327000	1	3578500	1	1	1685900	1	0.230441	0.518144
sp|Q8NE86|MCU_HUMANCalciumuniporterprotein,mitochondrialOS=HomosapiensGN=MCUPE=1SV=1	1	1	1	1	7406400	1	1	2606900	1	1	0.53542	0.103211
sp|P38606|VATA_HUMANV-typeprotonATPasecatalyticsubunitAOS=HomosapiensGN=ATP6V1APE=1SV=2;tr|C9JA17|C9JA17_HUMANV-typeprotonATPasecatalyticsubunitA(Fragment)OS=HomosapiensGN=ATP6V1APE=1SV=8;tr|C9JVW8|C9JVW8_HUMANV-typeprotonATPasecatalyticsubunitA(Fragment)OS=HomosapiensGN=ATP6V1APE=1SV=1	2875200	1	4155700	14901000	1	5973200	5110100	3821100	17307000	1573200	-0.109352	#NUM!
sp|P31946|1433B_HUMAN14-3-3proteinbeta/alphaOS=HomosapiensGN=YWHABPE=1SV=3;tr|Q4VY20|Q4VY20_HUMAN14-3-3proteinbeta/alpha(Fragment)OS=HomosapiensGN=YWHABPE=1SV=1;tr|Q4VY19|Q4VY19_HUMAN14-3-3proteinbeta/alpha(Fragment)OS=HomosapiensGN=YWHABPE=1SV=1;tr|A0A0J9YWE8|A0A0J9YWE8_HUMAN14-3-3proteinbeta/alphaOS=HomosapiensGN=YWHABPE=1SV=1;tr|A0A0J9YWZ2|A0A0J9YWZ2_HUMAN14-3-3proteinbeta/alpha(Fragment)OS=Ho…	61146000	93130000	10942000	173820000	18519000	30103000	8831000	128060000	60975000	18189000	0.0684876	0.849932
sp|Q8N392|RHG18_HUMANRhoGTPase-activatingprotein18OS=HomosapiensGN=ARHGAP18PE=1SV=3	34966000	78037000	6994700	61253000	18786000	16440000	1	6731600	91946000	20856000	0.0643488	0.858926
sp|P17655|CAN2_HUMANCalpain-2catalyticsubunitOS=HomosapiensGN=CAPN2PE=1SV=6	29849000	16545000	5549200	78168000	1	22045000	1	86573000	97416000	722650	-0.101024	#NUM!
sp|Q96G03|PGM2_HUMANPhosphoglucomutase-2OS=HomosapiensGN=PGM2PE=1SV=4;tr|E9PD70|E9PD70_HUMANPhosphoglucomutase-2OS=HomosapiensGN=PGM2PE=1SV=1;tr|E7ENQ8|E7ENQ8_HUMANPhosphoglucomutase-2OS=HomosapiensGN=PGM2PE=1SV=1	35142000	19860000	1	21515000	1	1	6904400	44347000	74048000	1	-0.0560177	#NUM!
sp|P14625|ENPL_HUMANEndoplasminOS=HomosapiensGN=HSP90B1PE=1SV=1;tr|Q96GW1|Q96GW1_HUMANEndoplasminOS=HomosapiensGN=HSP90B1PE=1SV=1;tr|A0A1W2PRR1|A0A1W2PRR1_HUMANEndoplasminOS=HomosapiensGN=HSP90B1PE=1SV=1;tr|H0YIV0|H0YIV0_HUMANEndoplasmin(Fragment)OS=HomosapiensGN=HSP90B1PE=1SV=1;tr|F8VPC7|F8VPC7_HUMANEndoplasminOS=HomosapiensGN=HSP90B1PE=1SV=1;sp|Q58FF3|ENPLL_HUMANPutativeendoplasmin-likeproteinO…	18597000	34853000	20647000	46846000	89969000	20959000	146750000	65270000	39597000	18223000	0.0471149	0.896516
tr|H7BXY6|H7BXY6_HUMANTetraspaninOS=HomosapiensGN=TSPAN14PE=1SV=1;sp|Q8NG11|TSN14_HUMANTetraspanin-14OS=HomosapiensGN=TSPAN14PE=1SV=1;tr|A6NEP9|A6NEP9_HUMANTetraspanin(Fragment)OS=HomosapiensGN=TSPAN14PE=1SV=2	1	1	63646000	1267500	1	1	1	15075000	1293400	10066000	-0.353141	#NUM!
sp|O60884|DNJA2_HUMANDnaJhomologsubfamilyAmember2OS=HomosapiensGN=DNAJA2PE=1SV=1;tr|A0A087WT48|A0A087WT48_HUMANDnaJhomologsubfamilyAmember2(Fragment)OS=HomosapiensGN=DNAJA2PE=1SV=1	7815100	4135200	3808100	5070200	8830800	11812000	1	25922000	6390200	1	-0.0125604	#NUM!
tr|F5H2F4|F5H2F4_HUMANC-1-tetrahydrofolatesynthase,cytoplasmicOS=HomosapiensGN=MTHFD1PE=1SV=1;tr|V9GY75|V9GY75_HUMANC-1-tetrahydrofolatesynthase,cytoplasmic(Fragment)OS=HomosapiensGN=MTHFD1PE=1SV=1	1	1	1	1504800	1	1	1	1	4018000	1	-0.07306	#NUM!
tr|C9JPM4|C9JPM4_HUMANADP-ribosylationfactor4(Fragment)OS=HomosapiensGN=ARF4PE=1SV=1;sp|P18085|ARF4_HUMANADP-ribosylationfactor4OS=HomosapiensGN=ARF4PE=1SV=3;tr|F5H1V1|F5H1V1_HUMANADP-ribosylationfactor3(Fragment)OS=HomosapiensGN=ARF3PE=4SV=1;tr|F5H6T5|F5H6T5_HUMANADP-ribosylationfactor3(Fragment)OS=HomosapiensGN=ARF3PE=4SV=1;tr|F8WDB3|F8WDB3_HUMANADP-ribosylationfactor4OS=HomosapiensGN=ARF4PE=1S…	6933500	32751000	2597000	29565000	14004000	1	1	162640000	17496000	1	-0.223456	#NUM!
sp|Q14247|SRC8_HUMANSrcsubstratecortactinOS=HomosapiensGN=CTTNPE=1SV=2;tr|H0YCD9|H0YCD9_HUMANSrcsubstratecortactin(Fragment)OS=HomosapiensGN=CTTNPE=1SV=1	4722900	1	1	1	1	1	1	1	12422000	1	0.0519789	0.885886
sp|O95716|RAB3D_HUMANRas-relatedproteinRab-3DOS=HomosapiensGN=RAB3DPE=1SV=1	21775000	1727400	1	2011600	1	9258900	1	2672300	1	490160	0.474978	0.157837
sp|P04839|CY24B_HUMANCytochromeb-245heavychainOS=HomosapiensGN=CYBBPE=1SV=2	56107000	22060000	18169000	56244000	25339000	32767000	1	255030000	17361000	13427000	-0.122081	#NUM!
tr|F8WF90|F8WF90_HUMANPRA1familyproteinOS=HomosapiensGN=ARL6IP5PE=1SV=1;tr|C9JQU6|C9JQU6_HUMANPRA1familyproteinOS=HomosapiensGN=ARL6IP5PE=1SV=1;tr|F8WF33|F8WF33_HUMANPRA1familyproteinOS=HomosapiensGN=ARL6IP5PE=1SV=1;sp|O75915|PRAF3_HUMANPRA1familyprotein3OS=HomosapiensGN=ARL6IP5PE=1SV=1	1	4284900	1601800	6852600	1	3020200	1	3696800	1635900	1	-0.174815	#NUM!
sp|Q71U36|TBA1A_HUMANTubulinalpha-1AchainOS=HomosapiensGN=TUBA1APE=1SV=1;sp|Q9BQE3|TBA1C_HUMANTubulinalpha-1CchainOS=HomosapiensGN=TUBA1CPE=1SV=1;sp|P68363|TBA1B_HUMANTubulinalpha-1BchainOS=HomosapiensGN=TUBA1BPE=1SV=1;tr|F5H5D3|F5H5D3_HUMANTubulinalphachainOS=HomosapiensGN=TUBA1CPE=1SV=1;sp|Q13748|TBA3C_HUMANTubulinalpha-3C/DchainOS=HomosapiensGN=TUBA3CPE=1SV=3;tr|F8VQQ4|F8VQQ4_HUMANTubulinalpha…	943180000	751620000	132420000	1813800000	21977000	381530000	357040000	284040000	1116200000	512530000	0.175749	0.624533
sp|P11216|PYGB_HUMANGlycogenphosphorylase,brainformOS=HomosapiensGN=PYGBPE=1SV=5;tr|H0Y4Z6|H0Y4Z6_HUMANAlpha-1,4glucanphosphorylase(Fragment)OS=HomosapiensGN=PYGBPE=1SV=1	16360000	20229000	1	25406000	1	10496000	1	6523500	22876000	3401600	0.120084	0.73934
sp|P13639|EF2_HUMANElongationfactor2OS=HomosapiensGN=EEF2PE=1SV=4;tr|K7EJ74|K7EJ74_HUMAN116kDaU5smallnuclearribonucleoproteincomponent(Fragment)OS=HomosapiensGN=EFTUD2PE=1SV=1;tr|K7EP67|K7EP67_HUMAN116kDaU5smallnuclearribonucleoproteincomponent(Fragment)OS=HomosapiensGN=EFTUD2PE=1SV=1;sp|Q15029|U5S1_HUMAN116kDaU5smallnuclearribonucleoproteincomponentOS=HomosapiensGN=EFTUD2PE=1SV=1	64915000	96386000	85643000	190870000	14368000	121190000	35538000	239220000	147610000	42613000	-0.320255	#NUM!
sp|Q13200|PSMD2_HUMAN26Sproteasomenon-ATPaseregulatorysubunit2OS=HomosapiensGN=PSMD2PE=1SV=3;tr|H7C2Q3|H7C2Q3_HUMAN26Sproteasomenon-ATPaseregulatorysubunit2(Fragment)OS=HomosapiensGN=PSMD2PE=1SV=1;tr|H7C1H2|H7C1H2_HUMAN26Sproteasomenon-ATPaseregulatorysubunit2(Fragment)OS=HomosapiensGN=PSMD2PE=1SV=1;tr|C9JPC0|C9JPC0_HUMAN26Sproteasomenon-ATPaseregulatorysubunit2(Fragment)OS=HomosapiensGN=PSMD2PE=…	25626000	18356000	1	27339000	7926600	32953000	1	62803000	10915000	8052300	-0.050468	#NUM!
sp|P01857|IGHG1_HUMANImmunoglobulinheavyconstantgamma1OS=HomosapiensGN=IGHG1PE=1SV=1;tr|A0A0A0MS08|A0A0A0MS08_HUMANImmunoglobulinheavyconstantgamma1(Fragment)OS=HomosapiensGN=IGHG1PE=1SV=1;tr|A0A0A0MS07|A0A0A0MS07_HUMANImmunoglobulinheavyconstantgamma1(Fragment)OS=HomosapiensGN=IGHG1PE=1SV=1	1224500000	444900000	7019800000	985050000	19052000	333200000	2326000000	585090000	6855300000	4634800000	-0.436596	#NUM!
sp|Q9H2G2|SLK_HUMANSTE20-likeserine/threonine-proteinkinaseOS=HomosapiensGN=SLKPE=1SV=1	4902000	6291800	1	6283800	1	1	1	27043000	5733100	1	-0.204576	#NUM!
sp|P32455|GBP1_HUMANGuanylate-bindingprotein1OS=HomosapiensGN=GBP1PE=1SV=2	1	13595000	1	16519000	1	1	1	1	16285000	1	-0.0518272	#NUM!
tr|B4DGU4|B4DGU4_HUMANCateninbeta-1OS=HomosapiensGN=CTNNB1PE=1SV=1;sp|P35222|CTNB1_HUMANCateninbeta-1OS=HomosapiensGN=CTNNB1PE=1SV=1	1	1	1	2856300	1	1	1	1	1156100	1	0.162892	0.650532
tr|K7EJ28|K7EJ28_HUMANTumornecrosisfactorligandsuperfamilymember13OS=HomosapiensGN=TNFSF13PE=3SV=1;tr|C9JFN2|C9JFN2_HUMANTumornecrosisfactorligandsuperfamilymember13(Fragment)OS=HomosapiensGN=TNFSF13PE=3SV=1;tr|C9JF68|C9JF68_HUMANTumornecrosisfactorligandsuperfamilymember13(Fragment)OS=HomosapiensGN=TNFSF13PE=3SV=1;tr|Q2QBA2|Q2QBA2_HUMANTumornecrosisfactor(Ligand)superfamilymember13transcriptvari…	3160000	1	1	1	5971900	1	1	1	4873100	1	0.653654	0.0346733
sp|P50395|GDIB_HUMANRabGDPdissociationinhibitorbetaOS=HomosapiensGN=GDI2PE=1SV=2;tr|Q5SX87|Q5SX87_HUMANRabGDPdissociationinhibitor(Fragment)OS=HomosapiensGN=GDI2PE=1SV=1;tr|V9GYJ7|V9GYJ7_HUMANRabGDPdissociationinhibitor(Fragment)OS=HomosapiensGN=GDI2PE=1SV=8;tr|V9GYF8|V9GYF8_HUMANRabGDPdissociationinhibitor(Fragment)OS=HomosapiensGN=GDI2PE=1SV=1;tr|Q5SX90|Q5SX90_HUMANRabGDPdissociationinhibitor(F…	32485000	38442000	5448000	154810000	1	1	1	19882000	198150000	152250000	-0.109336	#NUM!
sp|A0A0B4J1Y9|HV372_HUMANImmunoglobulinheavyvariable3-72OS=HomosapiensGN=IGHV3-72PE=3SV=1;tr|A0A075B7D8|A0A075B7D8_HUMANImmunoglobulinheavyvariable3/OR15-7(pseudogene)(Fragment)OS=HomosapiensGN=IGHV3OR15-7PE=1SV=1	1	1	1	29164000	1	1	1	1	11953000	1	0.161862	0.65263
sp|P40763|STAT3_HUMANSignaltransducerandactivatoroftranscription3OS=HomosapiensGN=STAT3PE=1SV=2;tr|G8JLH9|G8JLH9_HUMANSignaltransducerandactivatoroftranscriptionOS=HomosapiensGN=STAT3PE=1SV=1	17763000	12786000	1	14754000	1	29426000	5815700	8560500	4132100	13559000	-0.0112237	#NUM!
sp|P37802|TAGL2_HUMANTransgelin-2OS=HomosapiensGN=TAGLN2PE=1SV=3;tr|X6RJP6|X6RJP6_HUMANTransgelin-2(Fragment)OS=HomosapiensGN=TAGLN2PE=1SV=1;tr|C9J5W6|C9J5W6_HUMANTransgelin-3OS=HomosapiensGN=TAGLN3PE=1SV=1;sp|Q9UI15|TAGL3_HUMANTransgelin-3OS=HomosapiensGN=TAGLN3PE=1SV=2	43789000	104690000	11363000	93326000	1	14821000	1	21634000	380480000	41901000	-0.151044	#NUM!
sp|P41091|IF2G_HUMANEukaryotictranslationinitiationfactor2subunit3OS=HomosapiensGN=EIF2S3PE=1SV=3;sp|Q2VIR3|IF2GL_HUMANPutativeeukaryotictranslationinitiationfactor2subunit3-likeproteinOS=HomosapiensGN=EIF2S3LPE=5SV=2;tr|H7BZU1|H7BZU1_HUMANEukaryotictranslationinitiationfactor2subunit3(Fragment)OS=HomosapiensGN=EIF2S3PE=1SV=1;tr|F8W810|F8W810_HUMANPutativeeukaryotictranslationinitiationfactor2sub…	1	1	1	6472400	1	1	1	1400900	12625000	1	-0.0694529	#NUM!
tr|A0A140TA32|A0A140TA32_HUMANComplementC4-AOS=HomosapiensGN=C4APE=1SV=1;tr|A0A140TA44|A0A140TA44_HUMANComplementC4-AOS=HomosapiensGN=C4APE=1SV=1	490850000	1266900000	7882100000	1251900000	36448000	959370000	565310000	568340000	1754800000	2989500000	-0.408496	#NUM!
sp|P04114|APOB_HUMANApolipoproteinB-100OS=HomosapiensGN=APOBPE=1SV=2;tr|A8MUN2|A8MUN2_HUMANApolipoproteinB-100OS=HomosapiensGN=APOBPE=1SV=2	22736000	5735100	470610000	26527000	3393100	14058000	36957000	704980000	203810000	4877800	-0.434597	#NUM!
sp|P07305|H10_HUMANHistoneH1.0OS=HomosapiensGN=H1F0PE=1SV=3	14750000	1	1	1955800	1	19013000	1	4519900	4059800	1091100	0.185306	0.605433
sp|P0DMV9|HS71B_HUMANHeatshock70kDaprotein1BOS=HomosapiensGN=HSPA1BPE=1SV=1;sp|P0DMV8|HS71A_HUMANHeatshock70kDaprotein1AOS=HomosapiensGN=HSPA1APE=1SV=1;tr|A0A0G2JIW1|A0A0G2JIW1_HUMANHeatshock70kDaprotein1BOS=HomosapiensGN=HSPA1BPE=1SV=1;tr|V9GZ37|V9GZ37_HUMANHeatshock70kDaprotein1AOS=HomosapiensGN=HSPA1APE=1SV=1	192320000	211570000	10554000	269550000	63906000	43979000	225650000	35729000	195150000	80599000	0.20037	0.575748
sp|O15551|CLD3_HUMANClaudin-3OS=HomosapiensGN=CLDN3PE=1SV=1	1	1	1	1	3673000	1	1	8678800	1	1	-0.0054565	#NUM!
sp|P53004|BIEA_HUMANBiliverdinreductaseAOS=HomosapiensGN=BLVRAPE=1SV=2	1	10394000	3224100	18781000	38259000	18414000	1	23318000	60251000	2480900	0.112734	0.754887
sp|Q14914|PTGR1_HUMANProstaglandinreductase1OS=HomosapiensGN=PTGR1PE=1SV=2;tr|F2Z3J9|F2Z3J9_HUMANProstaglandinreductase1(Fragment)OS=HomosapiensGN=PTGR1PE=1SV=2;tr|F6XGT7|F6XGT7_HUMANProstaglandinreductase1OS=HomosapiensGN=PTGR1PE=1SV=1;tr|Q5JVP2|Q5JVP2_HUMANProstaglandinreductase1(Fragment)OS=HomosapiensGN=PTGR1PE=1SV=1	1	68248000	1	38281000	1	18474000	1	1	27654000	20950000	-0.213134	#NUM!
sp|O75643|U520_HUMANU5smallnuclearribonucleoprotein200kDahelicaseOS=HomosapiensGN=SNRNP200PE=1SV=2	1	1	3997700	1	1	1	1	9165900	1	1	-0.369819	#NUM!
sp|Q9H4G4|GAPR1_HUMANGolgi-associatedplantpathogenesis-relatedprotein1OS=HomosapiensGN=GLIPR2PE=1SV=3;tr|Q5VZR0|Q5VZR0_HUMANGolgi-associatedplantpathogenesis-relatedprotein1OS=HomosapiensGN=GLIPR2PE=1SV=1;tr|A0A088AWP7|A0A088AWP7_HUMANGolgi-associatedplantpathogenesis-relatedprotein1OS=HomosapiensGN=GLIPR2PE=1SV=1;tr|A0A087WUM5|A0A087WUM5_HUMANGolgi-associatedplantpathogenesis-relatedprotein1OS=H…	73031000	46847000	11496000	97835000	1	25216000	16838000	171900000	99694000	9183700	-0.115669	#NUM!
sp|P35998|PRS7_HUMAN26Sproteasomeregulatorysubunit7OS=HomosapiensGN=PSMC2PE=1SV=3;tr|C9JLS9|C9JLS9_HUMAN26Sproteasomeregulatorysubunit7(Fragment)OS=HomosapiensGN=PSMC2PE=1SV=1;tr|A0A1W2PQS1|A0A1W2PQS1_HUMAN26Sproteasomeregulatorysubunit7OS=HomosapiensGN=PSMC2PE=1SV=1	249950000	197380000	104800000	172320000	1	130570000	1	258320000	165740000	1	0.0115497	0.974581
sp|P40925|MDHC_HUMANMalatedehydrogenase,cytoplasmicOS=HomosapiensGN=MDH1PE=1SV=4;tr|B9A041|B9A041_HUMANMalatedehydrogenase,cytoplasmicOS=HomosapiensGN=MDH1PE=1SV=1;tr|C9JF79|C9JF79_HUMANMalatedehydrogenase(Fragment)OS=HomosapiensGN=MDH1PE=1SV=1;tr|B8ZZ51|B8ZZ51_HUMANMalatedehydrogenase,cytoplasmicOS=HomosapiensGN=MDH1PE=1SV=1;tr|C9JRL4|C9JRL4_HUMANMalatedehydrogenase,cytoplasmic(Fragment)OS=Homos…	38517000	98914000	7378100	111870000	1	64758000	83225000	8765200	88399000	82031000	-0.257218	#NUM!
tr|X6R433|X6R433_HUMANTyrosine-proteinphosphataseOS=HomosapiensGN=PTPRCPE=1SV=1;sp|P08575|PTPRC_HUMANReceptor-typetyrosine-proteinphosphataseCOS=HomosapiensGN=PTPRCPE=1SV=2;tr|A0A0A0MT22|A0A0A0MT22_HUMANTyrosine-proteinphosphataseOS=HomosapiensGN=PTPRCPE=1SV=1;tr|M3ZCP1|M3ZCP1_HUMANTyrosine-proteinphosphatase(Fragment)OS=HomosapiensGN=PTPRCPE=1SV=1;tr|A0A075B788|A0A075B788_HUMANTyrosine-proteinph…	138400000	74715000	56492000	87431000	54230000	226750000	1	336600000	27880000	1	-0.0701196	#NUM!
tr|B5MCE7|B5MCE7_HUMANBasicleucinezipperandW2domain-containingprotein2OS=HomosapiensGN=BZW2PE=1SV=1;tr|B5MCH7|B5MCH7_HUMANBasicleucinezipperandW2domain-containingprotein2OS=HomosapiensGN=BZW2PE=1SV=1;tr|E7ETZ4|E7ETZ4_HUMANBasicleucinezipperandW2domain-containingprotein2(Fragment)OS=HomosapiensGN=BZW2PE=1SV=1;sp|Q9Y6E2|BZW2_HUMANBasicleucinezipperandW2domain-containingprotein2OS=HomosapiensGN=BZW2…	1	2307500	1	3260000	1	1	1	5425800	3510700	1	-0.272098	#NUM!
tr|F5GX11|F5GX11_HUMANProteasomeendopeptidasecomplexOS=HomosapiensGN=PSMA1PE=1SV=1;sp|P25786|PSA1_HUMANProteasomesubunitalphatype-1OS=HomosapiensGN=PSMA1PE=1SV=1;tr|B4DEV8|B4DEV8_HUMANProteasomesubunitalphatypeOS=HomosapiensPE=2SV=1	1	1	1	1	100730000	27632000	71737000	28426000	20886000	9490700	0.300675	0.393504
sp|P01860|IGHG3_HUMANImmunoglobulinheavyconstantgamma3OS=HomosapiensGN=IGHG3PE=1SV=2	11118000	10247000	545090000	25991000	188080000	64337000	105440000	48381000	487670000	426160000	-0.336055	#NUM!
sp|P68371|TBB4B_HUMANTubulinbeta-4BchainOS=HomosapiensGN=TUBB4BPE=1SV=1;sp|P04350|TBB4A_HUMANTubulinbeta-4AchainOS=HomosapiensGN=TUBB4APE=1SV=2;tr|M0R2D3|M0R2D3_HUMANTubulinbeta-4Achain(Fragment)OS=HomosapiensGN=TUBB4APE=1SV=1;tr|M0QY85|M0QY85_HUMANTubulinbeta-4Achain(Fragment)OS=HomosapiensGN=TUBB4APE=1SV=1;tr|M0QZL7|M0QZL7_HUMANTubulinbeta-4Achain(Fragment)OS=HomosapiensGN=TUBB4APE=1SV=8;tr|M0R…	1290400000	1584000000	142470000	783000000	14360000	603750000	247280000	769000000	899790000	476290000	-0.00102575	#NUM!
tr|A0A087X0X3|A0A087X0X3_HUMANHeterogeneousnuclearribonucleoproteinMOS=HomosapiensGN=HNRNPMPE=1SV=1;sp|P52272|HNRPM_HUMANHeterogeneousnuclearribonucleoproteinMOS=HomosapiensGN=HNRNPMPE=1SV=3;tr|M0R019|M0R019_HUMANHeterogeneousnuclearribonucleoproteinM(Fragment)OS=HomosapiensGN=HNRNPMPE=1SV=8;tr|M0R2T0|M0R2T0_HUMANHeterogeneousnuclearribonucleoproteinM(Fragment)OS=HomosapiensGN=HNRNPMPE=1SV=1;tr|M…	2115400	1	1	2273100	4737900	10574000	1	1	2135100	1779300	0.245368	0.490438
sp|P18206|VINC_HUMANVinculinOS=HomosapiensGN=VCLPE=1SV=4;tr|A0A096LPE1|A0A096LPE1_HUMANVinculinOS=HomosapiensGN=VCLPE=1SV=1	15583000	23275000	8392700	15348000	19031000	8158900	1	36962000	61739000	4461500	-0.0707266	#NUM!
sp|Q9UKK3|PARP4_HUMANPoly[ADP-ribose]polymerase4OS=HomosapiensGN=PARP4PE=1SV=3	1	1	1	1	34031000	9119600	1	5370000	2359100	1	0.559112	0.0855715
sp|O95436|NPT2B_HUMANSodium-dependentphosphatetransportprotein2BOS=HomosapiensGN=SLC34A2PE=1SV=3;tr|D6RBC0|D6RBC0_HUMANSodium-dependentphosphatetransportprotein2B(Fragment)OS=HomosapiensGN=SLC34A2PE=1SV=1;tr|D6RA94|D6RA94_HUMANSodium-dependentphosphatetransportprotein2B(Fragment)OS=HomosapiensGN=SLC34A2PE=1SV=1	134060000	70695000	1	32144000	9150200	51285000	20441000	27345000	51617000	33718000	0.344719	0.323417
sp|P02750|A2GL_HUMANLeucine-richalpha-2-glycoproteinOS=HomosapiensGN=LRG1PE=1SV=2	5910000	3899900	14852000	3374300	1	1	1	1	17548000	1	-0.14922	#NUM!
sp|O15143|ARC1B_HUMANActin-relatedprotein2/3complexsubunit1BOS=HomosapiensGN=ARPC1BPE=1SV=3;tr|A0A1W2PNV4|A0A1W2PNV4_HUMANUncharacterizedproteinOS=HomosapiensPE=4SV=1;tr|C9J4Z7|C9J4Z7_HUMANActin-relatedprotein2/3complexsubunit1B(Fragment)OS=HomosapiensGN=ARPC1BPE=1SV=1;tr|F8VXW2|F8VXW2_HUMANActin-relatedprotein2/3complexsubunit1BOS=HomosapiensGN=ARPC1BPE=1SV=2;tr|C9JEY1|C9JEY1_HUMANActin-relatedp…	22039000	77016000	17208000	154210000	56869000	75240000	38294000	78715000	65209000	1	0.116962	0.745934
sp|P02760|AMBP_HUMANProteinAMBPOS=HomosapiensGN=AMBPPE=1SV=1;tr|S4R471|S4R471_HUMANProteinAMBP(Fragment)OS=HomosapiensGN=AMBPPE=1SV=1;tr|S4R3Y4|S4R3Y4_HUMANProteinAMBPOS=HomosapiensGN=AMBPPE=1SV=1;CON__P00978	35167000	9249100	345680000	3590200	1	56587000	26896000	40125000	29573000	77070000	-0.351259	#NUM!
sp|P04433|KV311_HUMANImmunoglobulinkappavariable3-11OS=HomosapiensGN=IGKV3-11PE=1SV=1;sp|A0A0A0MRZ8|KVD11_HUMANImmunoglobulinkappavariable3D-11OS=HomosapiensGN=IGKV3D-11PE=3SV=6	1	6732900	47846000	1	1	16440000	27018000	1	40513000	1	-0.472861	#NUM!
sp|Q5VTE0|EF1A3_HUMANPutativeelongationfactor1-alpha-like3OS=HomosapiensGN=EEF1A1P5PE=5SV=1;sp|P68104|EF1A1_HUMANElongationfactor1-alpha1OS=HomosapiensGN=EEF1A1PE=1SV=1;tr|A0A087WVQ9|A0A087WVQ9_HUMANElongationfactor1-alpha1OS=HomosapiensGN=EEF1A1PE=1SV=1;tr|A0A087WV01|A0A087WV01_HUMANElongationfactor1-alphaOS=HomosapiensGN=EEF1A1PE=1SV=1;sp|Q05639|EF1A2_HUMANElongationfactor1-alpha2OS=Homosapiens…	428610000	4062100000	1521000000	3394300000	60729000	1718500000	1136900000	642780000	2684600000	1196500000	-0.338557	#NUM!
sp|Q13409|DC1I2_HUMANCytoplasmicdynein1intermediatechain2OS=HomosapiensGN=DYNC1I2PE=1SV=3;tr|E7EQL5|E7EQL5_HUMANCytoplasmicdynein1intermediatechain2(Fragment)OS=HomosapiensGN=DYNC1I2PE=1SV=1;tr|E9PGG1|E9PGG1_HUMANCytoplasmicdynein1intermediatechain2(Fragment)OS=HomosapiensGN=DYNC1I2PE=1SV=1;tr|E7EUM4|E7EUM4_HUMANCytoplasmicdynein1intermediatechain2(Fragment)OS=HomosapiensGN=DYNC1I2PE=1SV=1;tr|E7E…	4029200	2501000	1	5612400	1	2711800	1	1	5650900	1	0.245739	0.489758
sp|Q9NP55|BPIA1_HUMANBPIfold-containingfamilyAmember1OS=HomosapiensGN=BPIFA1PE=1SV=1	180740000	159590000	1	71279000	1	3818800	172180000	15149000	3574600	95975000	0.114289	0.751591
tr|G3V2V8|G3V2V8_HUMANEpididymalsecretoryproteinE1(Fragment)OS=HomosapiensGN=NPC2PE=1SV=1;tr|J3KMY5|J3KMY5_HUMANEpididymalsecretoryproteinE1OS=HomosapiensGN=NPC2PE=1SV=1;sp|P61916|NPC2_HUMANEpididymalsecretoryproteinE1OS=HomosapiensGN=NPC2PE=1SV=1;tr|G3V3E8|G3V3E8_HUMANEpididymalsecretoryproteinE1OS=HomosapiensGN=NPC2PE=1SV=1;tr|E7EMS2|E7EMS2_HUMANEpididymalsecretoryproteinE1OS=HomosapiensGN=NPC2…	2680800	5813000	1	3402200	1	4531800	1	12298000	1182800	1	-0.243147	#NUM!
sp|P09914|IFIT1_HUMANInterferon-inducedproteinwithtetratricopeptiderepeats1OS=HomosapiensGN=IFIT1PE=1SV=2;sp|Q5T764|IFT1B_HUMANInterferon-inducedproteinwithtetratricopeptiderepeats1BOS=HomosapiensGN=IFIT1BPE=1SV=1	1	13378000	6806800	21761000	1	19402000	1	1	4392400	5185300	-0.139882	#NUM!
sp|P60228|EIF3E_HUMANEukaryotictranslationinitiationfactor3subunitEOS=HomosapiensGN=EIF3EPE=1SV=1;tr|E5RIP5|E5RIP5_HUMANEukaryotictranslationinitiationfactor3subunitEOS=HomosapiensGN=EIF3EPE=1SV=1;tr|E5RJ25|E5RJ25_HUMANEukaryotictranslationinitiationfactor3subunitEOS=HomosapiensGN=EIF3EPE=1SV=1;tr|E5RII3|E5RII3_HUMANEukaryotictranslationinitiationfactor3subunitEOS=HomosapiensGN=EIF3EPE=1SV=1;tr|E…	18146000	45429000	36488000	35965000	1	15369000	33555000	49900000	5101800	3693100	-0.402846	#NUM!
sp|Q08257|QOR_HUMANQuinoneoxidoreductaseOS=HomosapiensGN=CRYZPE=1SV=1;tr|C9JH92|C9JH92_HUMANQuinoneoxidoreductase(Fragment)OS=HomosapiensGN=CRYZPE=1SV=1;tr|A6NP24|A6NP24_HUMANQuinoneoxidoreductase(Fragment)OS=HomosapiensGN=CRYZPE=1SV=1	1919800	2494300	2322800	1	1	1	1	1	12806000	1	-0.161208	#NUM!
sp|P05023|AT1A1_HUMANSodium/potassium-transportingATPasesubunitalpha-1OS=HomosapiensGN=ATP1A1PE=1SV=1;tr|M0R116|M0R116_HUMANSodium/potassium-transportingATPasesubunitalphaOS=HomosapiensGN=ATP1A3PE=1SV=1;tr|B1AKY9|B1AKY9_HUMANSodium/potassium-transportingATPasesubunitalphaOS=HomosapiensGN=ATP1A2PE=1SV=1;sp|P13637|AT1A3_HUMANSodium/potassium-transportingATPasesubunitalpha-3OS=HomosapiensGN=ATP1A3PE…	24837000	14477000	5169000	26506000	21416000	10929000	11826000	95521000	14974000	1	-0.0325787	#NUM!
tr|E7EPB3|E7EPB3_HUMAN60SribosomalproteinL14OS=HomosapiensGN=RPL14PE=1SV=1;sp|P50914|RL14_HUMAN60SribosomalproteinL14OS=HomosapiensGN=RPL14PE=1SV=4	3075200	1	1	3630800	1	1	1	1	12883000	1	0.0389767	0.914333
sp|Q9Y3I0|RTCB_HUMANtRNA-splicingligaseRtcBhomologOS=HomosapiensGN=RTCBPE=1SV=1	9640200	1	1	7360600	1	1	1	14263000	11346000	1	0.0764641	0.832641
sp|P01619|KV320_HUMANImmunoglobulinkappavariable3-20OS=HomosapiensGN=IGKV3-20PE=1SV=2	1	5256000	50150000	14392000	1	1	1	5156000	23821000	17104000	-0.38122	#NUM!
sp|Q9NZM1|MYOF_HUMANMyoferlinOS=HomosapiensGN=MYOFPE=1SV=1;tr|H0YD14|H0YD14_HUMANMyoferlin(Fragment)OS=HomosapiensGN=MYOFPE=1SV=1	21297000	16469000	1	21675000	1	20602000	1	25267000	17585000	10773000	-0.0348011	#NUM!
sp|P01861|IGHG4_HUMANImmunoglobulinheavyconstantgamma4OS=HomosapiensGN=IGHG4PE=1SV=1	1	75198	125650000	92451	1	1	1	1	247270000	1	-0.269641	#NUM!
tr|A0A087WV45|A0A087WV45_HUMANTransthyretinOS=HomosapiensGN=TTRPE=1SV=1;sp|P02766|TTHY_HUMANTransthyretinOS=HomosapiensGN=TTRPE=1SV=1;tr|A0A087WT59|A0A087WT59_HUMANTransthyretinOS=HomosapiensGN=TTRPE=1SV=1	7621700	9065600	125540000	5802000	1	9292400	1	1593000	9141600	69034000	-0.354932	#NUM!
tr|E9PNR8|E9PNR8_HUMANHypoxia-induciblefactor1-alphainhibitorOS=HomosapiensGN=HIF1ANPE=1SV=1;sp|Q9NWT6|HIF1N_HUMANHypoxia-induciblefactor1-alphainhibitorOS=HomosapiensGN=HIF1ANPE=1SV=2	1	2202300	1	1	1	1034200	1	1	124900	1	-0.244572	#NUM!
sp|P23381|SYWC_HUMANTryptophan--tRNAligase,cytoplasmicOS=HomosapiensGN=WARSPE=1SV=2;tr|G3V277|G3V277_HUMANTryptophan--tRNAligase,cytoplasmic(Fragment)OS=HomosapiensGN=WARSPE=1SV=1;tr|G3V3H8|G3V3H8_HUMANTryptophan--tRNAligase,cytoplasmic(Fragment)OS=HomosapiensGN=WARSPE=1SV=8;tr|G3V3Y5|G3V3Y5_HUMANTryptophan--tRNAligase,cytoplasmic(Fragment)OS=HomosapiensGN=WARSPE=1SV=8;tr|G3V3X0|G3V3X0_HUMANTrypt…	12613000	39964000	44339000	112950000	1	30562000	1	40410000	127790000	74083000	-0.272684	#NUM!
sp|P28482|MK01_HUMANMitogen-activatedproteinkinase1OS=HomosapiensGN=MAPK1PE=1SV=3	1	7552100	1	1302800	13543000	4623200	5004000	1143300	552170	4968500	0.327419	0.350151
sp|P48735|IDHP_HUMANIsocitratedehydrogenase[NADP],mitochondrialOS=HomosapiensGN=IDH2PE=1SV=2;tr|H0YL11|H0YL11_HUMANIsocitratedehydrogenase[NADP],mitochondrialOS=HomosapiensGN=IDH2PE=1SV=1	6012600	7666700	1	7795300	1	1	19656000	7547700	3026000	1	-0.143108	#NUM!
sp|Q9Y6Y8|S23IP_HUMANSEC23-interactingproteinOS=HomosapiensGN=SEC23IPPE=1SV=1;tr|H7C0V8|H7C0V8_HUMANSEC23-interactingprotein(Fragment)OS=HomosapiensGN=SEC23IPPE=1SV=1	1	1	1	1	7986000	1	1	10899000	2742100	1	0.132273	0.713732
tr|E9PDF6|E9PDF6_HUMANUnconventionalmyosin-IbOS=HomosapiensGN=MYO1BPE=1SV=1;sp|O43795|MYO1B_HUMANUnconventionalmyosin-IbOS=HomosapiensGN=MYO1BPE=1SV=3;tr|H7C2Y7|H7C2Y7_HUMANUnconventionalmyosin-Ib(Fragment)OS=HomosapiensGN=MYO1BPE=1SV=1;tr|E7EQD9|E7EQD9_HUMANUnconventionalmyosin-Ib(Fragment)OS=HomosapiensGN=MYO1BPE=1SV=1	1	16230000	1	4998800	1	1	1	35151000	2129100	1	-0.328027	#NUM!
tr|F5H7V9|F5H7V9_HUMANTenascinOS=HomosapiensGN=TNCPE=1SV=1;tr|E9PC84|E9PC84_HUMANTenascinOS=HomosapiensGN=TNCPE=1SV=1;tr|J3QSU6|J3QSU6_HUMANTenascinOS=HomosapiensGN=TNCPE=1SV=1;sp|P24821|TENA_HUMANTenascinOS=HomosapiensGN=TNCPE=1SV=3;tr|H0YGZ3|H0YGZ3_HUMANTenascin(Fragment)OS=HomosapiensGN=TNCPE=1SV=1	5494900	1	4375500	1	1	1	1	2089500	4591200	1	0.0988988	0.784359
tr|C9IZZ0|C9IZZ0_HUMANRas-relatedproteinRab-7a(Fragment)OS=HomosapiensGN=RAB7APE=1SV=1;tr|C9J4V0|C9J4V0_HUMANRas-relatedproteinRab-7aOS=HomosapiensGN=RAB7APE=1SV=1;tr|C9J8S3|C9J8S3_HUMANRas-relatedproteinRab-7aOS=HomosapiensGN=RAB7APE=1SV=1;sp|P51149|RAB7A_HUMANRas-relatedproteinRab-7aOS=HomosapiensGN=RAB7APE=1SV=1;tr|C9J7D1|C9J7D1_HUMANRas-relatedproteinRab-7aOS=HomosapiensGN=RAB7APE=1SV=1;tr|C9…	1	1	22222000	1	1	1	1	1	11720000	1	-0.309063	#NUM!
sp|Q9Y3C8|UFC1_HUMANUbiquitin-foldmodifier-conjugatingenzyme1OS=HomosapiensGN=UFC1PE=1SV=3	4602300	23132000	26524000	15755000	1	31856000	10186000	3527000	10636000	29658000	-0.564694	#NUM!
sp|O43707|ACTN4_HUMANAlpha-actinin-4OS=HomosapiensGN=ACTN4PE=1SV=2;tr|F5GXS2|F5GXS2_HUMANAlpha-actinin-4OS=HomosapiensGN=ACTN4PE=1SV=2;tr|H7C144|H7C144_HUMANAlpha-actinin-4(Fragment)OS=HomosapiensGN=ACTN4PE=1SV=1;tr|K7EJH8|K7EJH8_HUMANAlpha-actinin-4(Fragment)OS=HomosapiensGN=ACTN4PE=1SV=1;tr|F6THM6|F6THM6_HUMANAlpha-actinin-2OS=HomosapiensGN=ACTN2PE=1SV=1;tr|K7EP19|K7EP19_HUMANAlpha-actinin-4(Fr…	233000000	247130000	35195000	375020000	1	170410000	153380000	252610000	112080000	40183000	0.0361142	0.920608
sp|Q14697|GANAB_HUMANNeutralalpha-glucosidaseABOS=HomosapiensGN=GANABPE=1SV=3;tr|F5H6X6|F5H6X6_HUMANNeutralalpha-glucosidaseABOS=HomosapiensGN=GANABPE=1SV=1;tr|E9PKU7|E9PKU7_HUMANNeutralalpha-glucosidaseABOS=HomosapiensGN=GANABPE=1SV=1;tr|E9PNH1|E9PNH1_HUMANNeutralalpha-glucosidaseAB(Fragment)OS=HomosapiensGN=GANABPE=1SV=1	36879000	1	1	1	1	8220400	1	1	10242000	2611500	0.480232	0.15253
sp|P27348|1433T_HUMAN14-3-3proteinthetaOS=HomosapiensGN=YWHAQPE=1SV=1;tr|E9PG15|E9PG15_HUMAN14-3-3proteintheta(Fragment)OS=HomosapiensGN=YWHAQPE=1SV=1	15700000	13088000	1	20118000	1	1	1	18502000	17994000	1	0.110472	0.759689
sp|Q13247|SRSF6_HUMANSerine/arginine-richsplicingfactor6OS=HomosapiensGN=SRSF6PE=1SV=2;tr|A0A0D9SEM4|A0A0D9SEM4_HUMANSerine/arginine-rich-splicingfactor4(Fragment)OS=HomosapiensGN=SRSF4PE=1SV=1;sp|Q08170|SRSF4_HUMANSerine/arginine-richsplicingfactor4OS=HomosapiensGN=SRSF4PE=1SV=2;tr|B4DJK0|B4DJK0_HUMANSerine/arginine-rich-splicingfactor5OS=HomosapiensGN=SRSF5PE=1SV=1;tr|B4DUA4|B4DUA4_HUMANSerine/…	1	1	1	3499600	1	1	1	3139100	2330500	1	-0.0932564	#NUM!
sp|P63104|1433Z_HUMAN14-3-3proteinzeta/deltaOS=HomosapiensGN=YWHAZPE=1SV=1;tr|E7EX29|E7EX29_HUMAN14-3-3proteinzeta/delta(Fragment)OS=HomosapiensGN=YWHAZPE=1SV=1;tr|E7ESK7|E7ESK7_HUMAN14-3-3proteinzeta/delta(Fragment)OS=HomosapiensGN=YWHAZPE=1SV=1;tr|E9PD24|E9PD24_HUMAN14-3-3proteinzeta/delta(Fragment)OS=HomosapiensGN=YWHAZPE=1SV=1;tr|E7EVZ2|E7EVZ2_HUMAN14-3-3proteinzeta/delta(Fragment)OS=Homosapi…	407560000	264140000	45445000	424220000	33988000	296440000	1246000	208580000	341010000	121160000	0.222513	0.533105
tr|E9PJD9|E9PJD9_HUMAN60SribosomalproteinL27aOS=HomosapiensGN=RPL27APE=1SV=1;sp|P46776|RL27A_HUMAN60SribosomalproteinL27aOS=HomosapiensGN=RPL27APE=1SV=2;tr|E9PLL6|E9PLL6_HUMAN60SribosomalproteinL27aOS=HomosapiensGN=RPL27APE=1SV=1;tr|E9PLX7|E9PLX7_HUMAN60SribosomalproteinL27aOS=HomosapiensGN=RPL27APE=1SV=1	1	2501900	5976600	4038900	1	1	1	1	5108700	4216000	-0.358661	#NUM!
sp|P50991|TCPD_HUMANT-complexprotein1subunitdeltaOS=HomosapiensGN=CCT4PE=1SV=4	1	1	1949500	26384000	1	1	10771000	4442900	27133000	1	-0.0629632	#NUM!
tr|H0YH81|H0YH81_HUMANATPsynthasesubunitbeta(Fragment)OS=HomosapiensGN=ATP5BPE=1SV=1;sp|P06576|ATPB_HUMANATPsynthasesubunitbeta,mitochondrialOS=HomosapiensGN=ATP5BPE=1SV=3;tr|F8W079|F8W079_HUMANATPsynthasesubunitbeta,mitochondrial(Fragment)OS=HomosapiensGN=ATP5BPE=1SV=1	2929600	12018000	1982700	95053000	3783200	1004700	54565000	2649700	17558000	1	0.0884594	0.806757
sp|Q9Y265|RUVB1_HUMANRuvB-like1OS=HomosapiensGN=RUVBL1PE=1SV=1;tr|H7C4G5|H7C4G5_HUMANRuvB-likehelicase(Fragment)OS=HomosapiensGN=RUVBL1PE=1SV=1;tr|J3QLR1|J3QLR1_HUMANRuvB-likehelicase(Fragment)OS=HomosapiensGN=RUVBL1PE=1SV=1;tr|E7ETR0|E7ETR0_HUMANRuvB-likehelicaseOS=HomosapiensGN=RUVBL1PE=1SV=1	65449000	24390000	16863000	47680000	1	23671000	1	40512000	43150000	20293000	0.203512	0.569622
sp|Q13576|IQGA2_HUMANRasGTPase-activating-likeproteinIQGAP2OS=HomosapiensGN=IQGAP2PE=1SV=4;tr|E7EWC2|E7EWC2_HUMANRasGTPase-activating-likeproteinIQGAP2(Fragment)OS=HomosapiensGN=IQGAP2PE=1SV=1;tr|F5H7S7|F5H7S7_HUMANRasGTPase-activating-likeproteinIQGAP2OS=HomosapiensGN=IQGAP2PE=1SV=2;tr|D6R939|D6R939_HUMANRasGTPase-activating-likeproteinIQGAP2(Fragment)OS=HomosapiensGN=IQGAP2PE=1SV=8	3527300	1	1	686130	1	1	1	7087500	1	1	0.0258242	0.943194
sp|Q5T6V5|QSPP_HUMANQueuosinesalvageproteinOS=HomosapiensGN=C9orf64PE=1SV=1	1	1	1	2473600	19565000	3890500	1	1	2521500	8171800	0.53036	0.10725
sp|P13489|RINI_HUMANRibonucleaseinhibitorOS=HomosapiensGN=RNH1PE=1SV=2;tr|H0YCR7|H0YCR7_HUMANRibonucleaseinhibitor(Fragment)OS=HomosapiensGN=RNH1PE=1SV=1;tr|E9PMJ3|E9PMJ3_HUMANRibonucleaseinhibitor(Fragment)OS=HomosapiensGN=RNH1PE=1SV=1;tr|E9PLZ3|E9PLZ3_HUMANRibonucleaseinhibitor(Fragment)OS=HomosapiensGN=RNH1PE=1SV=1;tr|E9PIM9|E9PIM9_HUMANRibonucleaseinhibitor(Fragment)OS=HomosapiensGN=RNH1PE=1S…	68100000	143760000	10838000	239160000	1	74460000	10601000	180350000	226090000	76993000	-0.182452	#NUM!
sp|P00747|PLMN_HUMANPlasminogenOS=HomosapiensGN=PLGPE=1SV=2;tr|Q5TEH5|Q5TEH5_HUMANHCG2029799,isoformCRA_bOS=HomosapiensGN=PLGPE=1SV=1;tr|A6PVI2|A6PVI2_HUMANPlasminogen(Fragment)OS=HomosapiensGN=PLGPE=1SV=1;sp|Q02325|PLGB_HUMANPlasminogen-likeproteinBOS=HomosapiensGN=PLGLB1PE=3SV=1;CON__P06868	12904000	4532500	682020000	1910200	5130300	2558400	1124400	347680000	84007000	1490700	-0.376328	#NUM!
sp|O60664|PLIN3_HUMANPerilipin-3OS=HomosapiensGN=PLIN3PE=1SV=3;tr|K7ERZ3|K7ERZ3_HUMANPerilipin-3(Fragment)OS=HomosapiensGN=PLIN3PE=1SV=1;tr|K7EL96|K7EL96_HUMANPerilipin-3(Fragment)OS=HomosapiensGN=PLIN3PE=1SV=8;tr|K7ER39|K7ER39_HUMANPerilipin-3(Fragment)OS=HomosapiensGN=PLIN3PE=1SV=1;tr|K7EJD0|K7EJD0_HUMANPerilipin-3(Fragment)OS=HomosapiensGN=PLIN3PE=1SV=1	13389000	7693000	5270400	26535000	1	21247000	1	1	14268000	6470400	0.147822	0.681425
sp|P09769|FGR_HUMANTyrosine-proteinkinaseFgrOS=HomosapiensGN=FGRPE=1SV=2	9637700	1	1	1	1	1	1	16221000	1	1	0.0538284	0.881848
tr|Q5T985|Q5T985_HUMANInter-alpha-trypsininhibitorheavychainH2OS=HomosapiensGN=ITIH2PE=1SV=1;sp|P19823|ITIH2_HUMANInter-alpha-trypsininhibitorheavychainH2OS=HomosapiensGN=ITIH2PE=1SV=2;tr|Q5T987|Q5T987_HUMANInter-alpha-trypsininhibitorheavychainH2(Fragment)OS=HomosapiensGN=ITIH2PE=1SV=1;CON__Q9TRI1	871710	5210100	328680000	2400600	1	13287000	9435400	209820000	205510000	37527000	-0.488574	#NUM!
sp|P06744|G6PI_HUMANGlucose-6-phosphateisomeraseOS=HomosapiensGN=GPIPE=1SV=4;tr|A0A0A0MTS2|A0A0A0MTS2_HUMANGlucose-6-phosphateisomerase(Fragment)OS=HomosapiensGN=GPIPE=1SV=1;tr|K7EQ48|K7EQ48_HUMANGlucose-6-phosphateisomeraseOS=HomosapiensGN=GPIPE=1SV=2;tr|A0A0J9YXP8|A0A0J9YXP8_HUMANGlucose-6-phosphateisomerase(Fragment)OS=HomosapiensGN=GPIPE=1SV=1;tr|A0A0J9YX90|A0A0J9YX90_HUMANGlucose-6-phosphate…	31159000	225610000	1	223620000	50759000	97048000	26377000	7516500	255570000	28949000	-0.0233599	#NUM!
sp|Q4G0F5|VP26B_HUMANVacuolarproteinsorting-associatedprotein26BOS=HomosapiensGN=VPS26BPE=1SV=2	7343400	4615900	1	4433300	1	7684400	1	1721100	3018900	543670	0.233024	0.513306
tr|E9PCX2|E9PCX2_HUMANAldosereductaseOS=HomosapiensGN=AKR1B1PE=1SV=1;sp|P15121|ALDR_HUMANAldosereductaseOS=HomosapiensGN=AKR1B1PE=1SV=3;tr|E9PEF9|E9PEF9_HUMANAldosereductaseOS=HomosapiensGN=AKR1B1PE=1SV=1	1	25007000	1	1	1	1	1	1	15064000	1	-0.251435	#NUM!
tr|A0A075B6R9|A0A075B6R9_HUMANImmunoglobulinkappavariable2D-24(non-functional)(Fragment)OS=HomosapiensGN=IGKV2D-24PE=4SV=1;sp|A0A0C4DH68|KV224_HUMANImmunoglobulinkappavariable2-24OS=HomosapiensGN=IGKV2-24PE=3SV=1	4045300	4717700	72920000	4843400	10603000	5398600	6198300	3527200	39675000	75109000	-0.385359	#NUM!
tr|D6RAT0|D6RAT0_HUMAN40SribosomalproteinS3aOS=HomosapiensGN=RPS3APE=1SV=1;sp|P61247|RS3A_HUMAN40SribosomalproteinS3aOS=HomosapiensGN=RPS3APE=1SV=2;tr|D6RAS7|D6RAS7_HUMAN40SribosomalproteinS3a(Fragment)OS=HomosapiensGN=RPS3APE=1SV=1;tr|D6R9B6|D6R9B6_HUMAN40SribosomalproteinS3aOS=HomosapiensGN=RPS3APE=1SV=1;tr|H0Y8L7|H0Y8L7_HUMAN40SribosomalproteinS3a(Fragment)OS=HomosapiensGN=RPS3APE=1SV=1;tr|D6R…	1	2583500	9100500	3654100	1	9228800	1	1	8972800	1650300	-0.391888	#NUM!
sp|P02649|APOE_HUMANApolipoproteinEOS=HomosapiensGN=APOEPE=1SV=1;tr|H0Y7L5|H0Y7L5_HUMANApolipoproteinE(Fragment)OS=HomosapiensGN=APOEPE=1SV=2;tr|E9PEV4|E9PEV4_HUMANApolipoproteinE(Fragment)OS=HomosapiensGN=APOEPE=1SV=1;tr|E7ERP7|E7ERP7_HUMANApolipoproteinE(Fragment)OS=HomosapiensGN=APOEPE=1SV=1;CON__Q03247	16232000	26544000	343480000	26463000	1	18754000	35668000	174280000	56888000	7094200	-0.420498	#NUM!
sp|P20340|RAB6A_HUMANRas-relatedproteinRab-6AOS=HomosapiensGN=RAB6APE=1SV=3;tr|F5H3K7|F5H3K7_HUMANRas-relatedproteinRab-6A(Fragment)OS=HomosapiensGN=RAB6APE=1SV=1;tr|F5GX61|F5GX61_HUMANRas-relatedproteinRab-6AOS=HomosapiensGN=RAB6APE=1SV=1;tr|C9JB90|C9JB90_HUMANRas-relatedproteinRab-6B(Fragment)OS=HomosapiensGN=RAB6BPE=4SV=1;tr|C9JU14|C9JU14_HUMANRas-relatedproteinRab-6B(Fragment)OS=HomosapiensGN…	17983000	23948000	1	19753000	30818000	42047000	1	16417000	5509100	14052000	0.373922	0.280724
sp|P10643|CO7_HUMANComplementcomponentC7OS=HomosapiensGN=C7PE=1SV=2;tr|B4DLR2|B4DLR2_HUMANProlylendopeptidaseFAPOS=HomosapiensGN=FAPPE=1SV=1;tr|A0A0D9SEN1|A0A0D9SEN1_HUMANProlylendopeptidaseFAPOS=HomosapiensGN=FAPPE=1SV=1;sp|Q12884|SEPR_HUMANProlylendopeptidaseFAPOS=HomosapiensGN=FAPPE=1SV=5	1	12588000	33572000	7261000	7916500	5707600	1	4739800	69948000	4435500	-0.267115	#NUM!
sp|P02786|TFR1_HUMANTransferrinreceptorprotein1OS=HomosapiensGN=TFRCPE=1SV=2;tr|G3V0E5|G3V0E5_HUMANTransferrinreceptor(P90,CD71),isoformCRA_cOS=HomosapiensGN=TFRCPE=1SV=1;tr|F8WBE5|F8WBE5_HUMANTransferrinreceptorprotein1OS=HomosapiensGN=TFRCPE=1SV=1;tr|H7C3V5|H7C3V5_HUMANTransferrinreceptorprotein1(Fragment)OS=HomosapiensGN=TFRCPE=1SV=1	27256000	55242000	22542000	85124000	18160000	25487000	39370000	25521000	25941000	67922000	-0.0999677	#NUM!
tr|A0A087WTT1|A0A087WTT1_HUMANPolyadenylate-bindingproteinOS=HomosapiensGN=PABPC1PE=1SV=1;tr|E7EQV3|E7EQV3_HUMANPolyadenylate-bindingproteinOS=HomosapiensGN=PABPC1PE=1SV=1;tr|E7ERJ7|E7ERJ7_HUMANPolyadenylate-bindingproteinOS=HomosapiensGN=PABPC1PE=1SV=1;sp|Q9H361|PABP3_HUMANPolyadenylate-bindingprotein3OS=HomosapiensGN=PABPC3PE=1SV=2;sp|P11940|PABP1_HUMANPolyadenylate-bindingprotein1OS=Homosapien…	12937000	6924000	1	8652700	1	1	28218000	4193400	3165600	2167000	0.00501682	0.988958
tr|F8W111|F8W111_HUMANCarboxypeptidaseM(Fragment)OS=HomosapiensGN=CPMPE=1SV=1;sp|P14384|CBPM_HUMANCarboxypeptidaseMOS=HomosapiensGN=CPMPE=1SV=2	1	7571000	1	4707000	1	1	1	1	8627500	1	-0.150759	#NUM!
sp|Q5VWZ2|LYPL1_HUMANLysophospholipase-likeprotein1OS=HomosapiensGN=LYPLAL1PE=1SV=3	1	16007000	1	10350000	5218500	3193200	5890800	9056700	6650800	1536900	-0.171055	#NUM!
sp|P05546|HEP2_HUMANHeparincofactor2OS=HomosapiensGN=SERPIND1PE=1SV=3;CON__ENSEMBL:ENSBTAP00000018574	8175700	18753000	104420000	9497800	1	27655000	22924000	6538400	13975000	39038000	-0.463106	#NUM!
sp|P29350|PTN6_HUMANTyrosine-proteinphosphatasenon-receptortype6OS=HomosapiensGN=PTPN6PE=1SV=1;tr|F5H0N8|F5H0N8_HUMANTyrosine-proteinphosphatase(Fragment)OS=HomosapiensGN=PTPN6PE=1SV=1;tr|F5H5H9|F5H5H9_HUMANTyrosine-proteinphosphatase(Fragment)OS=HomosapiensGN=PTPN6PE=1SV=1;tr|F5GY79|F5GY79_HUMANTyrosine-proteinphosphatase(Fragment)OS=HomosapiensGN=PTPN6PE=1SV=1;tr|F5H1Z8|F5H1Z8_HUMANTyrosine-pro…	25269000	38987000	1	64930000	116060000	49892000	1	101800000	51825000	1	0.411785	0.230085
sp|P37837|TALDO_HUMANTransaldolaseOS=HomosapiensGN=TALDO1PE=1SV=2;tr|F2Z393|F2Z393_HUMANTransaldolaseOS=HomosapiensGN=TALDO1PE=1SV=1;tr|E9PM01|E9PM01_HUMANTransaldolaseOS=HomosapiensGN=TALDO1PE=1SV=1;tr|E9PKI8|E9PKI8_HUMANTransaldolaseOS=HomosapiensGN=TALDO1PE=1SV=1	39181000	29997000	1967600	74461000	6754800	14784000	1	67874000	63895000	34072000	-0.012383	#NUM!
sp|P20292|AL5AP_HUMANArachidonate5-lipoxygenase-activatingproteinOS=HomosapiensGN=ALOX5APPE=1SV=2;tr|A0A087WW23|A0A087WW23_HUMANArachidonate5-lipoxygenase-activatingproteinOS=HomosapiensGN=ALOX5APPE=1SV=1	8332700	1	16205000	56577000	14254000	21809000	19072000	20168000	40160000	10711000	0.0296172	0.934864
sp|Q9Y3Z3|SAMH1_HUMANDeoxynucleosidetriphosphatetriphosphohydrolaseSAMHD1OS=HomosapiensGN=SAMHD1PE=1SV=2	93965000	41142000	7337500	189940000	9862400	9569200	54577000	90426000	117180000	10073000	0.188106	0.599876
sp|P78356|PI42B_HUMANPhosphatidylinositol5-phosphate4-kinasetype-2betaOS=HomosapiensGN=PIP4K2BPE=1SV=1	1	1	4757200	1	1	3925500	1	1	2674100	1	-0.362236	#NUM!
sp|Q86UX7|URP2_HUMANFermitinfamilyhomolog3OS=HomosapiensGN=FERMT3PE=1SV=1;tr|F5H1C6|F5H1C6_HUMANFermitinfamilyhomolog3(Fragment)OS=HomosapiensGN=FERMT3PE=1SV=1;tr|F5H3I6|F5H3I6_HUMANFermitinfamilyhomolog3(Fragment)OS=HomosapiensGN=FERMT3PE=1SV=1;tr|H0YFT5|H0YFT5_HUMANFermitinfamilyhomolog3(Fragment)OS=HomosapiensGN=FERMT3PE=1SV=1	18738000	28542000	11479000	44415000	26599000	35676000	1	91355000	20598000	7093300	-0.0647374	#NUM!
tr|F8VWV4|F8VWV4_HUMAN60SacidicribosomalproteinP0(Fragment)OS=HomosapiensGN=RPLP0PE=1SV=1;tr|F8VS58|F8VS58_HUMAN60SacidicribosomalproteinP0(Fragment)OS=HomosapiensGN=RPLP0PE=1SV=1;tr|F8VQY6|F8VQY6_HUMAN60SacidicribosomalproteinP0OS=HomosapiensGN=RPLP0PE=1SV=1;tr|F8VPE8|F8VPE8_HUMAN60SacidicribosomalproteinP0(Fragment)OS=HomosapiensGN=RPLP0PE=1SV=1;tr|F8VRK7|F8VRK7_HUMAN60SacidicribosomalproteinP0…	1	1	9401800	371930	1	3497100	1	1721800	1699900	1	-0.373122	#NUM!
sp|P02790|HEMO_HUMANHemopexinOS=HomosapiensGN=HPXPE=1SV=2;tr|Q9BS19|Q9BS19_HUMANHPXproteinOS=HomosapiensGN=HPXPE=1SV=1	56664000	10986000	636000000	12990000	1	1279200	6138100	46459000	186830000	282910000	-0.364636	#NUM!
sp|P61978|HNRPK_HUMANHeterogeneousnuclearribonucleoproteinKOS=HomosapiensGN=HNRNPKPE=1SV=1;tr|Q5T6W2|Q5T6W2_HUMANHeterogeneousnuclearribonucleoproteinK(Fragment)OS=HomosapiensGN=HNRNPKPE=1SV=1;tr|S4R359|S4R359_HUMANHeterogeneousnuclearribonucleoproteinK(Fragment)OS=HomosapiensGN=HNRNPKPE=1SV=1;tr|S4R457|S4R457_HUMANHeterogeneousnuclearribonucleoproteinKOS=HomosapiensGN=HNRNPKPE=1SV=1	52705000	22958000	11107000	39644000	1	71660000	17546000	21343000	22307000	13818000	0.0860106	0.812029
sp|P46926|GNPI1_HUMANGlucosamine-6-phosphateisomerase1OS=HomosapiensGN=GNPDA1PE=1SV=1;tr|D6R917|D6R917_HUMANGlucosamine-6-phosphateisomerase1(Fragment)OS=HomosapiensGN=GNPDA1PE=1SV=1;tr|D6RB13|D6RB13_HUMANGlucosamine-6-phosphateisomerase(Fragment)OS=HomosapiensGN=GNPDA1PE=1SV=8;tr|D6RAY7|D6RAY7_HUMANGlucosamine-6-phosphateisomerase(Fragment)OS=HomosapiensGN=GNPDA1PE=1SV=1;tr|D6R9P4|D6R9P4_HUMANGl…	1	1	1	7249100	1	1	1	1	4788100	1	0.111929	0.756596
sp|Q9Y6W5|WASF2_HUMANWiskott-Aldrichsyndromeproteinfamilymember2OS=HomosapiensGN=WASF2PE=1SV=3	1	1	1	3114800	1	1	1	1	2058400	1	0.111865	0.756732
sp|P35858|ALS_HUMANInsulin-likegrowthfactor-bindingproteincomplexacidlabilesubunitOS=HomosapiensGN=IGFALSPE=1SV=1	1	1507200	5203400	1	1	1	1	1	9796800	1	-0.30221	#NUM!
tr|A0A024R4E5|A0A024R4E5_HUMANHighdensitylipoproteinbindingprotein(Vigilin),isoformCRA_aOS=HomosapiensGN=HDLBPPE=1SV=1;sp|Q00341|VIGLN_HUMANVigilinOS=HomosapiensGN=HDLBPPE=1SV=2;tr|H0Y394|H0Y394_HUMANVigilin(Fragment)OS=HomosapiensGN=HDLBPPE=1SV=1;tr|H7C0A4|H7C0A4_HUMANVigilin(Fragment)OS=HomosapiensGN=HDLBPPE=1SV=8;tr|C9JMQ6|C9JMQ6_HUMANVigilin(Fragment)OS=HomosapiensGN=HDLBPPE=1SV=8;tr|C9JQ82|C…	1	14009000	1	3448900	1	5579500	4462500	1	3448100	1	-0.286365	#NUM!
sp|O60763|USO1_HUMANGeneralvesiculartransportfactorp115OS=HomosapiensGN=USO1PE=1SV=2	24072000	2565500	2986500	27251000	9549900	14033000	6504700	40805000	16723000	1	0.185267	0.605512
sp|P43353|AL3B1_HUMANAldehydedehydrogenasefamily3memberB1OS=HomosapiensGN=ALDH3B1PE=1SV=1;tr|Q9BUJ8|Q9BUJ8_HUMANALDH3B1proteinOS=HomosapiensGN=ALDH3B1PE=1SV=1;tr|A0A087X2D4|A0A087X2D4_HUMANAldehydedehydrogenasefamily3memberB1OS=HomosapiensGN=ALDH3B1PE=1SV=1;tr|A0A087WUF8|A0A087WUF8_HUMANAldehydedehydrogenasefamily3memberB1OS=HomosapiensGN=ALDH3B1PE=1SV=1;tr|A0A087X192|A0A087X192_HUMANAldehydedehy…	229190000	67443000	23131000	82505000	1	190760000	1	33325000	179200000	72715000	0.188351	0.599391
tr|V9GYE3|V9GYE3_HUMANApolipoproteinA-IIOS=HomosapiensGN=APOA2PE=1SV=1;tr|V9GYG9|V9GYG9_HUMANApolipoproteinA-II(Fragment)OS=HomosapiensGN=APOA2PE=1SV=1;sp|P02652|APOA2_HUMANApolipoproteinA-IIOS=HomosapiensGN=APOA2PE=1SV=1;tr|V9GYM3|V9GYM3_HUMANApolipoproteinA-IIOS=HomosapiensGN=APOA2PE=1SV=1;tr|V9GYC1|V9GYC1_HUMANApolipoproteinA-II(Fragment)OS=HomosapiensGN=APOA2PE=1SV=1;tr|V9GYS1|V9GYS1_HUMANApo…	68335000	108940000	561450000	184680000	11293000	106370000	26118000	473630000	80642000	79252000	-0.42037	#NUM!
sp|O14791|APOL1_HUMANApolipoproteinL1OS=HomosapiensGN=APOL1PE=1SV=5;tr|B1AH96|B1AH96_HUMANApolipoproteinL1(Fragment)OS=HomosapiensGN=APOL1PE=1SV=8	1	1	132890000	13669000	1	1	1	102790000	1	1	-0.371183	#NUM!
sp|P33176|KINH_HUMANKinesin-1heavychainOS=HomosapiensGN=KIF5BPE=1SV=1;tr|A0A0G2JMZ6|A0A0G2JMZ6_HUMANKinesin-likeprotein(Fragment)OS=HomosapiensGN=KIF5CPE=1SV=1;tr|J3KNA1|J3KNA1_HUMANKinesin-likeproteinOS=HomosapiensGN=KIF5APE=1SV=1;sp|O60282|KIF5C_HUMANKinesinheavychainisoform5COS=HomosapiensGN=KIF5CPE=1SV=1;sp|Q12840|KIF5A_HUMANKinesinheavychainisoform5AOS=HomosapiensGN=KIF5APE=1SV=2;tr|C9JWB9|C…	9598800	5638400	1	7293700	17530000	5770700	1	34422000	8941300	1	0.169103	0.637931
sp|P17174|AATC_HUMANAspartateaminotransferase,cytoplasmicOS=HomosapiensGN=GOT1PE=1SV=3	1	7543000	1	17778000	1	1	1	1	18771000	1	-0.0102133	#NUM!
tr|G3V3G2|G3V3G2_HUMANEna/VASP-likeproteinOS=HomosapiensGN=EVLPE=1SV=1;tr|G3V535|G3V535_HUMANEna/VASP-likeproteinOS=HomosapiensGN=EVLPE=1SV=1;tr|A0A087WYI2|A0A087WYI2_HUMANEna/VASP-likeproteinOS=HomosapiensGN=EVLPE=1SV=1	1	1	1	1	8005500	3219900	1	1	5181200	1992700	0.382136	0.269279
sp|P11586|C1TC_HUMANC-1-tetrahydrofolatesynthase,cytoplasmicOS=HomosapiensGN=MTHFD1PE=1SV=3;tr|V9GYY3|V9GYY3_HUMANC-1-tetrahydrofolatesynthase,cytoplasmic(Fragment)OS=HomosapiensGN=MTHFD1PE=1SV=1	15627000	13699000	5427700	37378000	7036100	28072000	1	7089300	23094000	11203000	0.16654	0.643121
sp|Q9Y295|DRG1_HUMANDevelopmentally-regulatedGTP-bindingprotein1OS=HomosapiensGN=DRG1PE=1SV=1;tr|H0YI06|H0YI06_HUMANDevelopmentally-regulatedGTP-bindingprotein1(Fragment)OS=HomosapiensGN=DRG1PE=1SV=1	3906000	1	1	1	1	1	1	3531200	1686100	1	0.194086	0.588067
tr|E7EQJ0|E7EQJ0_HUMANHeterogeneousnuclearribonucleoproteinH(Fragment)OS=HomosapiensGN=HNRNPH1PE=1SV=1;tr|D6RAM1|D6RAM1_HUMANHeterogeneousnuclearribonucleoproteinH(Fragment)OS=HomosapiensGN=HNRNPH1PE=1SV=1;tr|D6R9T0|D6R9T0_HUMANHeterogeneousnuclearribonucleoproteinH(Fragment)OS=HomosapiensGN=HNRNPH1PE=1SV=8;tr|D6RFM3|D6RFM3_HUMANHeterogeneousnuclearribonucleoproteinH(Fragment)OS=HomosapiensGN=HNR…	5934000	1	3244200	13766000	5190000	9619500	1	4091600	9521300	1200300	0.334246	0.339475
tr|M0R192|M0R192_HUMANFlavinreductase(NADPH)OS=HomosapiensGN=BLVRBPE=1SV=1;sp|P30043|BLVRB_HUMANFlavinreductase(NADPH)OS=HomosapiensGN=BLVRBPE=1SV=3;tr|M0QZL1|M0QZL1_HUMANFlavinreductase(NADPH)OS=HomosapiensGN=BLVRBPE=1SV=1	5815800	13096000	1	14433000	1	1	1	13253000	14526000	1	-0.079362	#NUM!
sp|P11226|MBL2_HUMANMannose-bindingproteinCOS=HomosapiensGN=MBL2PE=1SV=2	1	1	25710000	1	1	1	1	1	18199000	1	-0.312654	#NUM!
sp|Q93034|CUL5_HUMANCullin-5OS=HomosapiensGN=CUL5PE=1SV=4;tr|H0YCA0|H0YCA0_HUMANCullin-5(Fragment)OS=HomosapiensGN=CUL5PE=1SV=1	1	1	1	5274100	1	1	1	1	3749200	1	0.102425	0.776825
tr|H0YEU2|H0YEU2_HUMAN40SribosomalproteinS3(Fragment)OS=HomosapiensGN=RPS3PE=1SV=1;tr|E9PL09|E9PL09_HUMAN40SribosomalproteinS3OS=HomosapiensGN=RPS3PE=1SV=1;sp|P23396|RS3_HUMAN40SribosomalproteinS3OS=HomosapiensGN=RPS3PE=1SV=2;tr|E9PPU1|E9PPU1_HUMAN40SribosomalproteinS3OS=HomosapiensGN=RPS3PE=1SV=1;tr|E9PSF4|E9PSF4_HUMAN40SribosomalproteinS3OS=HomosapiensGN=RPS3PE=1SV=1;tr|E9PJN9|E9PJN9_HUMAN40Sri…	28815000	3152500	10187000	57626000	1	21766000	10229000	23370000	11942000	19763000	0.165489	0.645253
tr|E7EQG5|E7EQG5_HUMANCadherin-relatedfamilymember3OS=HomosapiensGN=CDHR3PE=1SV=1;sp|Q6ZTQ4|CDHR3_HUMANCadherin-relatedfamilymember3OS=HomosapiensGN=CDHR3PE=1SV=1;tr|H7C548|H7C548_HUMANCadherin-relatedfamilymember3(Fragment)OS=HomosapiensGN=CDHR3PE=4SV=1;tr|H7C555|H7C555_HUMANCadherin-relatedfamilymember3(Fragment)OS=HomosapiensGN=CDHR3PE=4SV=1	1	1	7302500	1	34069000	1	1	22280000	9960800	1	0.329195	0.347358
sp|Q12805|FBLN3_HUMANEGF-containingfibulin-likeextracellularmatrixprotein1OS=HomosapiensGN=EFEMP1PE=1SV=2;tr|A0A0U1RQV3|A0A0U1RQV3_HUMANEGF-containingfibulin-likeextracellularmatrixprotein1(Fragment)OS=HomosapiensGN=EFEMP1PE=1SV=1;tr|C9JUM4|C9JUM4_HUMANEGF-containingfibulin-likeextracellularmatrixprotein1(Fragment)OS=HomosapiensGN=EFEMP1PE=1SV=8;tr|C9JQX7|C9JQX7_HUMANEGF-containingfibulin-likeext…	7169200	9915600	5514400	20626000	1	12155000	1	8973500	21639000	6132900	-0.145944	#NUM!
sp|O15145|ARPC3_HUMANActin-relatedprotein2/3complexsubunit3OS=HomosapiensGN=ARPC3PE=1SV=3;tr|C9JZD1|C9JZD1_HUMANActin-relatedprotein2/3complexsubunit3(Fragment)OS=HomosapiensGN=ARPC3PE=1SV=1	2465500	17275000	3110400	32828000	17936000	12705000	1	16591000	34636000	1	0.11734	0.745134
sp|P11766|ADHX_HUMANAlcoholdehydrogenaseclass-3OS=HomosapiensGN=ADH5PE=1SV=4;tr|D6RFE4|D6RFE4_HUMANAlcoholdehydrogenaseclass-3OS=HomosapiensGN=ADH5PE=1SV=1;tr|H0YAG8|H0YAG8_HUMANAlcoholdehydrogenaseclass-3(Fragment)OS=HomosapiensGN=ADH5PE=1SV=1;tr|D6RAY0|D6RAY0_HUMANAlcoholdehydrogenaseclass-3OS=HomosapiensGN=ADH5PE=1SV=1;tr|D6R9G2|D6R9G2_HUMANAlcoholdehydrogenaseclass-3OS=HomosapiensGN=ADH5PE=1S…	2941400	5407700	1	6880800	7230000	1	1	1	16290000	2283300	0.232705	0.513903
sp|P19338|NUCL_HUMANNucleolinOS=HomosapiensGN=NCLPE=1SV=3;tr|H7BY16|H7BY16_HUMANNucleolin(Fragment)OS=HomosapiensGN=NCLPE=1SV=8	1	1	2518700	1	1	1	1	1823200	1	1	-0.384521	#NUM!
sp|Q9BZQ8|NIBAN_HUMANProteinNibanOS=HomosapiensGN=FAM129APE=1SV=1;tr|H0Y7M9|H0Y7M9_HUMANProteinNiban(Fragment)OS=HomosapiensGN=FAM129APE=1SV=1	31543000	13436000	7096400	24543000	1	1	1	51918000	11774000	1	0.0575595	0.873709
tr|H0YLA4|H0YLA4_HUMANSorbitoldehydrogenaseOS=HomosapiensGN=SORDPE=1SV=1;sp|Q00796|DHSO_HUMANSorbitoldehydrogenaseOS=HomosapiensGN=SORDPE=1SV=4;tr|H0YKB3|H0YKB3_HUMANSorbitoldehydrogenaseOS=HomosapiensGN=SORDPE=1SV=1	1	1	1	1	13092000	1	5609100	11277000	1	1	0.254042	0.474625
sp|P06310|KV230_HUMANImmunoglobulinkappavariable2-30OS=HomosapiensGN=IGKV2-30PE=3SV=2;sp|A0A075B6S6|KVD30_HUMANImmunoglobulinkappavariable2D-30OS=HomosapiensGN=IGKV2D-30PE=3SV=1	11347000	78122000	219060000	26705000	1	13068000	15990000	14143000	253650000	105070000	-0.446643	#NUM!
sp|P55072|TERA_HUMANTransitionalendoplasmicreticulumATPaseOS=HomosapiensGN=VCPPE=1SV=4	120920000	97370000	18283000	108240000	7784700	24335000	16461000	190590000	43572000	34431000	0.0110827	0.975608
sp|P30101|PDIA3_HUMANProteindisulfide-isomeraseA3OS=HomosapiensGN=PDIA3PE=1SV=4	21025000	19699000	10086000	36544000	80668000	12176000	1	54853000	65000000	17143000	0.415266	0.225703
tr|E2QRG8|E2QRG8_HUMANReceptorexpression-enhancingprotein(Fragment)OS=HomosapiensGN=REEP5PE=1SV=1;sp|Q00765|REEP5_HUMANReceptorexpression-enhancingprotein5OS=HomosapiensGN=REEP5PE=1SV=3	1	1	1	4306300	3938700	3093800	1	1	3840600	1	0.397015	0.249194
sp|P61586|RHOA_HUMANTransformingproteinRhoAOS=HomosapiensGN=RHOAPE=1SV=1;tr|E9PLA2|E9PLA2_HUMANRho-relatedGTP-bindingproteinRhoCOS=HomosapiensGN=RHOCPE=4SV=1;tr|C9JRM1|C9JRM1_HUMANTransformingproteinRhoAOS=HomosapiensGN=RHOAPE=1SV=1;tr|Q5JR06|Q5JR06_HUMANRho-relatedGTP-bindingproteinRhoC(Fragment)OS=HomosapiensGN=RHOCPE=4SV=8;tr|Q5JR07|Q5JR07_HUMANRho-relatedGTP-bindingproteinRhoC(Fragment)OS=Hom…	1	43109000	4653700	15245000	31677000	21430000	16437000	19201000	18510000	27210000	-0.15286	#NUM!
tr|F8W1R7|F8W1R7_HUMANMyosinlightpolypeptide6OS=HomosapiensGN=MYL6PE=1SV=1;sp|P60660|MYL6_HUMANMyosinlightpolypeptide6OS=HomosapiensGN=MYL6PE=1SV=2;tr|G3V1V0|G3V1V0_HUMANMyosinlightpolypeptide6OS=HomosapiensGN=MYL6PE=1SV=1;tr|F8VPF3|F8VPF3_HUMANMyosinlightpolypeptide6(Fragment)OS=HomosapiensGN=MYL6PE=1SV=1;tr|J3KND3|J3KND3_HUMANMyosinlightpolypeptide6OS=HomosapiensGN=MYL6PE=1SV=1;tr|G8JLA2|G8JLA2…	233050000	124990000	18643000	123330000	1	75075000	1	389190000	81715000	29243000	-0.012462	#NUM!
sp|P00352|AL1A1_HUMANRetinaldehydrogenase1OS=HomosapiensGN=ALDH1A1PE=1SV=2;tr|Q5SYQ7|Q5SYQ7_HUMANRetinaldehydrogenase1(Fragment)OS=HomosapiensGN=ALDH1A1PE=1SV=1;tr|Q5SYQ9|Q5SYQ9_HUMANRetinaldehydrogenase1OS=HomosapiensGN=ALDH1A1PE=1SV=1;tr|Q5SYQ8|Q5SYQ8_HUMANRetinaldehydrogenase1(Fragment)OS=HomosapiensGN=ALDH1A1PE=1SV=1;sp|P30837|AL1B1_HUMANAldehydedehydrogenaseX,mitochondrialOS=HomosapiensGN=AL…	252750000	209520000	20174000	219920000	1	168530000	35349000	37242000	205020000	326310000	0.00565908	0.987544
tr|C9JIS1|C9JIS1_HUMANGuaninenucleotide-bindingproteinG(I)/G(S)/G(T)subunitbeta-2(Fragment)OS=HomosapiensGN=GNB2PE=1SV=1;tr|C9JXA5|C9JXA5_HUMANGuaninenucleotide-bindingproteinG(I)/G(S)/G(T)subunitbeta-2(Fragment)OS=HomosapiensGN=GNB2PE=1SV=1;tr|C9JZN1|C9JZN1_HUMANGuaninenucleotide-bindingproteinG(I)/G(S)/G(T)subunitbeta-2(Fragment)OS=HomosapiensGN=GNB2PE=1SV=1;tr|C9JD14|C9JD14_HUMANGuaninenucleot…	216330000	189700000	12307000	43471000	59211000	79347000	16223000	247800000	172300000	58166000	0.0325073	0.92852
sp|P01031|CO5_HUMANComplementC5OS=HomosapiensGN=C5PE=1SV=4;CON__Q1A7A4	35050000	39176000	308480000	51847000	16801000	199900000	21544000	23250000	74932000	74523000	-0.362672	#NUM!
sp|Q99828|CIB1_HUMANCalciumandintegrin-bindingprotein1OS=HomosapiensGN=CIB1PE=1SV=4	94363000	63339000	1	23860000	28807000	41442000	1	119030000	25521000	46932000	0.101408	0.778997
sp|P62873|GBB1_HUMANGuaninenucleotide-bindingproteinG(I)/G(S)/G(T)subunitbeta-1OS=HomosapiensGN=GNB1PE=1SV=3;tr|B1AKQ8|B1AKQ8_HUMANGuaninenucleotide-bindingproteinG(I)/G(S)/G(T)subunitbeta-1(Fragment)OS=HomosapiensGN=GNB1PE=1SV=8;tr|F6X3N5|F6X3N5_HUMANGuaninenucleotide-bindingproteinG(I)/G(S)/G(T)subunitbeta-1(Fragment)OS=HomosapiensGN=GNB1PE=1SV=1;tr|F6UT28|F6UT28_HUMANGuaninenucleotide-bindingp…	80999000	26246000	16482000	12294000	27564000	19198000	1	91780000	22250000	12991000	0.240045	0.500247
sp|P09211|GSTP1_HUMANGlutathioneS-transferasePOS=HomosapiensGN=GSTP1PE=1SV=2;tr|A8MX94|A8MX94_HUMANGlutathioneS-transferasePOS=HomosapiensGN=GSTP1PE=1SV=1;tr|A0A087X2E9|A0A087X2E9_HUMANGlutathioneS-transferaseP(Fragment)OS=HomosapiensGN=GSTP1PE=1SV=1;tr|A0A087X243|A0A087X243_HUMANGlutathioneS-transferaseP(Fragment)OS=HomosapiensGN=GSTP1PE=1SV=1	61958000	219510000	42783000	597560000	13241000	31227000	57345000	75005000	280680000	615090000	-0.125386	#NUM!
sp|O60603|TLR2_HUMANToll-likereceptor2OS=HomosapiensGN=TLR2PE=1SV=1	1	1	1	5822600	1	1	1	3206800	3701000	1	-0.0192297	#NUM!
sp|P06737|PYGL_HUMANGlycogenphosphorylase,liverformOS=HomosapiensGN=PYGLPE=1SV=4;tr|E9PK47|E9PK47_HUMANAlpha-1,4glucanphosphorylaseOS=HomosapiensGN=PYGLPE=1SV=1;sp|P11217|PYGM_HUMANGlycogenphosphorylase,muscleformOS=HomosapiensGN=PYGMPE=1SV=6	72835000	214290000	11143000	35219000	24124000	15708000	7407200	257100000	17736000	14279000	-0.199888	#NUM!
sp|P11142|HSP7C_HUMANHeatshockcognate71kDaproteinOS=HomosapiensGN=HSPA8PE=1SV=1;tr|E9PKE3|E9PKE3_HUMANHeatshockcognate71kDaproteinOS=HomosapiensGN=HSPA8PE=1SV=1;tr|E9PNE6|E9PNE6_HUMANHeatshockcognate71kDaproteinOS=HomosapiensGN=HSPA8PE=1SV=1;tr|E9PLF4|E9PLF4_HUMANHeatshockcognate71kDaprotein(Fragment)OS=HomosapiensGN=HSPA8PE=1SV=1;tr|E9PN89|E9PN89_HUMANHeatshockcognate71kDaprotein(Fragment)OS=Hom…	204170000	208700000	38178000	389230000	56996000	145910000	312330000	30642000	245540000	220980000	0.032829	0.927814
sp|Q14152|EIF3A_HUMANEukaryotictranslationinitiationfactor3subunitAOS=HomosapiensGN=EIF3APE=1SV=1	20661000	6670000	1	16919000	1	17500000	1	7717700	14949000	1	0.280854	0.427157
sp|P02748|CO9_HUMANComplementcomponentC9OS=HomosapiensGN=C9PE=1SV=2;CON__Q3MHN2	45398000	38931000	55136000	23841000	1	15284000	1	19773000	80716000	60550000	-0.284294	#NUM!
sp|P55060|XPO2_HUMANExportin-2OS=HomosapiensGN=CSE1LPE=1SV=3	14784000	5198400	1	7329700	1	3479600	6967800	13798000	5626600	1	0.148739	0.679534
sp|P24752|THIL_HUMANAcetyl-CoAacetyltransferase,mitochondrialOS=HomosapiensGN=ACAT1PE=1SV=1	1	1	1	3691300	1	1204800	1	1	1887400	1	0.0981123	0.786042
sp|P14618|KPYM_HUMANPyruvatekinasePKMOS=HomosapiensGN=PKMPE=1SV=4;tr|H3BTN5|H3BTN5_HUMANPyruvatekinase(Fragment)OS=HomosapiensGN=PKMPE=1SV=1;tr|B4DNK4|B4DNK4_HUMANPyruvatekinaseOS=HomosapiensGN=PKMPE=1SV=1;tr|H3BQ34|H3BQ34_HUMANPyruvatekinaseOS=HomosapiensGN=PKMPE=1SV=1;tr|H3BR70|H3BR70_HUMANPyruvatekinaseOS=HomosapiensGN=PKMPE=1SV=1;tr|H3BT25|H3BT25_HUMANPyruvatekinasePKM(Fragment)OS=Homosapiens…	922530000	697650000	117190000	500840000	39002000	400120000	319630000	776410000	505420000	405390000	-0.00287066	#NUM!
sp|O95865|DDAH2_HUMANN(G),N(G)-dimethylargininedimethylaminohydrolase2OS=HomosapiensGN=DDAH2PE=1SV=1	12599000	11473000	1	11505000	1	7324400	5097400	1	11343000	9477300	0.100491	0.780955
sp|P04004|VTNC_HUMANVitronectinOS=HomosapiensGN=VTNPE=1SV=1;tr|F5GX75|F5GX75_HUMANVitronectin(Fragment)OS=HomosapiensGN=VTNPE=1SV=2;tr|H0YJW9|H0YJW9_HUMANUncharacterizedprotein(Fragment)OS=HomosapiensPE=1SV=3	67098000	26102000	482840000	40027000	1	3721500	14821000	449790000	63341000	2679200	-0.366235	#NUM!
tr|H0YLH3|H0YLH3_HUMANGeranylgeranyltransferasetype-2subunitalphaOS=HomosapiensGN=RABGGTAPE=1SV=1;sp|Q92696|PGTA_HUMANGeranylgeranyltransferasetype-2subunitalphaOS=HomosapiensGN=RABGGTAPE=1SV=2;tr|H0YKZ8|H0YKZ8_HUMANGeranylgeranyltransferasetype-2subunitalpha(Fragment)OS=HomosapiensGN=RABGGTAPE=1SV=1;tr|H0YMG5|H0YMG5_HUMANGeranylgeranyltransferasetype-2subunitalpha(Fragment)OS=HomosapiensGN=RABGG…	11742000	1	1	1	1	1	1	5767800	6686400	1077800	0.286667	0.417158
sp|Q9P2X0|DPM3_HUMANDolichol-phosphatemannosyltransferasesubunit3OS=HomosapiensGN=DPM3PE=1SV=2	1	1	1	2789400	1	1	1	1	2329300	1	0.0802275	0.824504
tr|E9PRV0|E9PRV0_HUMANVacuolarproteinsorting-associatedprotein51homolog(Fragment)OS=HomosapiensGN=VPS51PE=1SV=1;tr|E9PJ36|E9PJ36_HUMANVacuolarproteinsorting-associatedprotein51homolog(Fragment)OS=HomosapiensGN=VPS51PE=1SV=1;tr|E9PKX7|E9PKX7_HUMANVacuolarproteinsorting-associatedprotein51homolog(Fragment)OS=HomosapiensGN=VPS51PE=1SV=1;sp|Q9UID3|VPS51_HUMANVacuolarproteinsorting-associatedprotein51…	1	1	1	3017900	1	1	1	3604700	1	1	-0.0669291	#NUM!
sp|P13796|PLSL_HUMANPlastin-2OS=HomosapiensGN=LCP1PE=1SV=6;tr|Q5TBN3|Q5TBN3_HUMANPlastin-2(Fragment)OS=HomosapiensGN=LCP1PE=1SV=1;tr|Q5TBN5|Q5TBN5_HUMANPlastin-2(Fragment)OS=HomosapiensGN=LCP1PE=1SV=1	359020000	1526400000	167470000	1230000000	151290000	388650000	262090000	374400000	762070000	1426300000	-0.233175	#NUM!
tr|Q30118|Q30118_HUMANHLAclassIIhistocompatibilityantigen,DRalphachainOS=HomosapiensGN=HLA-DRAPE=1SV=1;tr|A0A0G2JH46|A0A0G2JH46_HUMANHLAclassIIhistocompatibilityantigen,DRalphachainOS=HomosapiensGN=HLA-DRAPE=1SV=1;tr|A0A0G2JMH6|A0A0G2JMH6_HUMANHLAclassIIhistocompatibilityantigen,DRalphachainOS=HomosapiensGN=HLA-DRAPE=1SV=1;sp|P01903|DRA_HUMANHLAclassIIhistocompatibilityantigen,DRalphachainOS=Homo…	12155000	101720000	9009700	87672000	43435000	76235000	26603000	47856000	47327000	67493000	-0.183285	#NUM!
tr|Q5JP53|Q5JP53_HUMANTubulinbetachainOS=HomosapiensGN=TUBBPE=1SV=1;sp|P07437|TBB5_HUMANTubulinbetachainOS=HomosapiensGN=TUBBPE=1SV=2;tr|Q5ST81|Q5ST81_HUMANTubulinbetachainOS=HomosapiensGN=TUBBPE=1SV=1;sp|Q9BVA1|TBB2B_HUMANTubulinbeta-2BchainOS=HomosapiensGN=TUBB2BPE=1SV=1;sp|A6NNZ2|TBB8L_HUMANTubulinbeta-8chain-likeproteinLOC260334OS=HomosapiensPE=1SV=1;sp|Q9H4B7|TBB1_HUMANTubulinbeta-1chainOS=H…	42365000	22980000	31491000	57034000	1	25102000	40981000	60403000	22191000	11885000	-0.160185	#NUM!
tr|K7EKI8|K7EKI8_HUMANPeriplakinOS=HomosapiensGN=PPLPE=1SV=1;sp|O60437|PEPL_HUMANPeriplakinOS=HomosapiensGN=PPLPE=1SV=4;tr|K7EQ71|K7EQ71_HUMANPeriplakin(Fragment)OS=HomosapiensGN=PPLPE=1SV=1	1	1	8950700	1	1	4525100	1	1	3401400	1	-0.353611	#NUM!
tr|F5H442|F5H442_HUMANTumorsusceptibilitygene101proteinOS=HomosapiensGN=TSG101PE=1SV=1;sp|Q99816|TS101_HUMANTumorsusceptibilitygene101proteinOS=HomosapiensGN=TSG101PE=1SV=2	6098000	7770200	8047700	1	6512400	10840000	1	14996000	3735800	481350	-0.138302	#NUM!
sp|P05109|S10A8_HUMANProteinS100-A8OS=HomosapiensGN=S100A8PE=1SV=1	112770000	100630000	23087000	46777000	2394300000	37100000	67533000	2160200000	45221000	64194000	0.322066	0.358634
sp|O14744|ANM5_HUMANProteinarginineN-methyltransferase5OS=HomosapiensGN=PRMT5PE=1SV=4;tr|G3V580|G3V580_HUMANProteinarginineN-methyltransferase5(Fragment)OS=HomosapiensGN=PRMT5PE=1SV=1;tr|G3V2L6|G3V2L6_HUMANProteinarginineN-methyltransferase5(Fragment)OS=HomosapiensGN=PRMT5PE=1SV=1;tr|G3V5L5|G3V5L5_HUMANProteinarginineN-methyltransferase5(Fragment)OS=HomosapiensGN=PRMT5PE=1SV=8;tr|C9JSX3|C9JSX3_HU…	6063900	5170900	1	2235200	1	1	1	1	15043000	1	0.0384779	0.915426
tr|B1AK87|B1AK87_HUMANCappingprotein(Actinfilament)muscleZ-line,beta,isoformCRA_aOS=HomosapiensGN=CAPZBPE=1SV=1;tr|B1AK88|B1AK88_HUMANCappingprotein(Actinfilament)muscleZ-line,beta,isoformCRA_dOS=HomosapiensGN=CAPZBPE=1SV=1	27237000	56551000	16722000	72526000	1	60527000	25236000	15691000	33759000	31344000	-0.178279	#NUM!
sp|P09960|LKHA4_HUMANLeukotrieneA-4hydrolaseOS=HomosapiensGN=LTA4HPE=1SV=2;tr|B4DEH5|B4DEH5_HUMANLeukotrieneA-4hydrolaseOS=HomosapiensGN=LTA4HPE=1SV=1	342120000	424550000	23898000	616630000	75403000	354060000	519840000	164310000	236060000	258930000	0.00630277	0.986127
sp|P00338|LDHA_HUMANL-lactatedehydrogenaseAchainOS=HomosapiensGN=LDHAPE=1SV=2;tr|F5GYU2|F5GYU2_HUMANL-lactatedehydrogenaseAchain(Fragment)OS=HomosapiensGN=LDHAPE=1SV=1;tr|F5GXY2|F5GXY2_HUMANL-lactatedehydrogenaseAchain(Fragment)OS=HomosapiensGN=LDHAPE=1SV=8;tr|F5GXH2|F5GXH2_HUMANL-lactatedehydrogenaseAchain(Fragment)OS=HomosapiensGN=LDHAPE=1SV=1;tr|F5H5J4|F5H5J4_HUMANL-lactatedehydrogenaseAchainO…	347290000	253040000	31401000	315780000	195530000	229110000	131870000	593380000	109640000	36019000	0.174836	0.626368
sp|P67936|TPM4_HUMANTropomyosinalpha-4chainOS=HomosapiensGN=TPM4PE=1SV=3;tr|K7EMU5|K7EMU5_HUMANTropomyosinalpha-4chain(Fragment)OS=HomosapiensGN=TPM4PE=1SV=1;tr|K7EPB9|K7EPB9_HUMANTropomyosinalpha-4chain(Fragment)OS=HomosapiensGN=TPM4PE=1SV=1;tr|K7ENT6|K7ENT6_HUMANTropomyosinalpha-4chain(Fragment)OS=HomosapiensGN=TPM4PE=1SV=1;tr|Q5TCU3|Q5TCU3_HUMANTropomyosinbetachainOS=HomosapiensGN=TPM2PE=1SV=1…	17609000	18989000	4330400	11538000	28130000	73821000	1	3314600	7142000	1864500	0.192436	0.591318
sp|Q9Y263|PLAP_HUMANPhospholipaseA-2-activatingproteinOS=HomosapiensGN=PLAAPE=1SV=2;tr|E5RIM3|E5RIM3_HUMANPhospholipaseA-2-activatingproteinOS=HomosapiensGN=PLAAPE=1SV=1;tr|H0YAU9|H0YAU9_HUMANPhospholipaseA-2-activatingprotein(Fragment)OS=HomosapiensGN=PLAAPE=1SV=1;tr|H0YBW4|H0YBW4_HUMANPhospholipaseA-2-activatingprotein(Fragment)OS=HomosapiensGN=PLAAPE=1SV=1	2737100	1761800	1329800	2748500	1	4203500	1	1	3138600	1566900	0.0182627	0.959814
sp|Q9NVJ2|ARL8B_HUMANADP-ribosylationfactor-likeprotein8BOS=HomosapiensGN=ARL8BPE=1SV=1	1	28566000	4620900	23537000	19548000	271560	3823300	60947000	6906600	1	-0.116396	#NUM!
sp|P11215|ITAM_HUMANIntegrinalpha-MOS=HomosapiensGN=ITGAMPE=1SV=2;sp|Q13349|ITAD_HUMANIntegrinalpha-DOS=HomosapiensGN=ITGADPE=1SV=2	44204000	182070000	5935500	40708000	3720400	1	1	256460000	2198000	1	-0.241068	#NUM!
sp|P68871|HBB_HUMANHemoglobinsubunitbetaOS=HomosapiensGN=HBBPE=1SV=2;tr|F8W6P5|F8W6P5_HUMANHemoglobinsubunitbeta(Fragment)OS=HomosapiensGN=HBBPE=1SV=1;tr|A0A0J9YWK4|A0A0J9YWK4_HUMANHemoglobinsubunitbetaOS=HomosapiensGN=HBBPE=1SV=1	255190000	264860000	979870000	2074700000	568130000	1143400000	474900000	372890000	1791300000	487800000	-0.0295682	#NUM!
sp|Q14894|CRYM_HUMANKetiminereductasemu-crystallinOS=HomosapiensGN=CRYMPE=1SV=1;tr|I3L325|I3L325_HUMANKetiminereductasemu-crystallin(Fragment)OS=HomosapiensGN=CRYMPE=1SV=1;tr|I3L3Y1|I3L3Y1_HUMANKetiminereductasemu-crystallin(Fragment)OS=HomosapiensGN=CRYMPE=1SV=1;tr|I3NI53|I3NI53_HUMANKetiminereductasemu-crystallin(Fragment)OS=HomosapiensGN=CRYMPE=1SV=1;tr|I3L2W5|I3L2W5_HUMANKetiminereductasemu-c…	23591000	48427000	5660200	53169000	1	3709500	4433700	27810000	98223000	2517100	-0.0998301	#NUM!
sp|P02675|FIBB_HUMANFibrinogenbetachainOS=HomosapiensGN=FGBPE=1SV=2;tr|D6REL8|D6REL8_HUMANFibrinogenbetachainOS=HomosapiensGN=FGBPE=1SV=1;CON__P02676	166540000	43837000	252570000	85243000	58029000	53113000	57217000	272320000	209510000	31119000	-0.185649	#NUM!
sp|O15144|ARPC2_HUMANActin-relatedprotein2/3complexsubunit2OS=HomosapiensGN=ARPC2PE=1SV=1;tr|C9JTV5|C9JTV5_HUMANArp2/3complex34kDasubunit(Fragment)OS=HomosapiensGN=ARPC2PE=1SV=8;tr|G5E9J0|G5E9J0_HUMANArp2/3complex34kDasubunitOS=HomosapiensGN=ARPC2PE=1SV=1;tr|G5E9S7|G5E9S7_HUMANActinrelatedprotein2/3complex,subunit2,34kDa,isoformCRA_eOS=HomosapiensGN=ARPC2PE=1SV=1;tr|H7C3F9|H7C3F9_HUMANArp2/3compl…	67885000	68735000	15409000	98334000	86017000	75550000	41831000	93887000	59820000	69629000	0.379059	0.273537
tr|B4E1Z4|B4E1Z4_HUMANcDNAFLJ55673,highlysimilartoComplementfactorB(EC3.4.21.47)OS=HomosapiensPE=1SV=1;tr|E7ETN3|E7ETN3_HUMANUncharacterizedproteinOS=HomosapiensPE=1SV=1;sp|P00751|CFAB_HUMANComplementfactorBOS=HomosapiensGN=CFBPE=1SV=2;tr|H7C5H1|H7C5H1_HUMANComplementfactorB(Fragment)OS=HomosapiensGN=CFBPE=1SV=1;tr|A0A0G2JH38|A0A0G2JH38_HUMANComplementfactorB(Fragment)OS=HomosapiensGN=CFBPE=3SV=1…	46108000	187750000	417160000	55294000	8191800	15215000	205830000	66599000	205160000	241180000	-0.596138	#NUM!
sp|Q96QK1|VPS35_HUMANVacuolarproteinsorting-associatedprotein35OS=HomosapiensGN=VPS35PE=1SV=2;tr|I3L4S0|I3L4S0_HUMANVacuolarproteinsorting-associatedprotein35OS=HomosapiensGN=VPS35PE=1SV=1;tr|A0A1W2PP10|A0A1W2PP10_HUMANVacuolarproteinsorting-associatedprotein35OS=HomosapiensGN=VPS35PE=1SV=1;tr|I3L4P4|I3L4P4_HUMANVacuolarproteinsorting-associatedprotein35OS=HomosapiensGN=VPS35PE=1SV=1	20473000	14532000	7211100	20877000	1	16368000	1	1	40419000	8033100	0.0343184	0.924547
sp|P39023|RL3_HUMAN60SribosomalproteinL3OS=HomosapiensGN=RPL3PE=1SV=2;tr|F8WCR1|F8WCR1_HUMAN60SribosomalproteinL3OS=HomosapiensGN=RPL3PE=1SV=1;tr|H7C3M2|H7C3M2_HUMAN60SribosomalproteinL3(Fragment)OS=HomosapiensGN=RPL3PE=1SV=1;tr|B5MCW2|B5MCW2_HUMAN60SribosomalproteinL3(Fragment)OS=HomosapiensGN=RPL3PE=1SV=1;tr|H7C422|H7C422_HUMAN60SribosomalproteinL3(Fragment)OS=HomosapiensGN=RPL3PE=1SV=1;tr|G5E9…	12130000	3111400	5748200	11260000	1	14216000	1	10158000	8487200	1	0.0768266	0.831857
tr|A0A087WVM2|A0A087WVM2_HUMANCD177antigenOS=HomosapiensGN=CD177PE=1SV=1;sp|Q8N6Q3|CD177_HUMANCD177antigenOS=HomosapiensGN=CD177PE=1SV=2	22776000	11414000	1	1	1	1	1	32870000	1	1	0.0462416	0.898426
sp|P01859|IGHG2_HUMANImmunoglobulinheavyconstantgamma2OS=HomosapiensGN=IGHG2PE=1SV=2	26579000	25279000	752640000	31681000	7966100	46026000	58669000	6785300	243660000	515270000	-0.417584	#NUM!
sp|P04843|RPN1_HUMANDolichyl-diphosphooligosaccharide--proteinglycosyltransferasesubunit1OS=HomosapiensGN=RPN1PE=1SV=1;tr|B7Z4L4|B7Z4L4_HUMANDolichyl-diphosphooligosaccharide--proteinglycosyltransferasesubunit1OS=HomosapiensGN=RPN1PE=1SV=1;tr|F8WF32|F8WF32_HUMANDolichyl-diphosphooligosaccharide--proteinglycosyltransferasesubunit1OS=HomosapiensGN=RPN1PE=1SV=1	17210000	14101000	1	14833000	2982800	1	1	47684000	1477700	1323700	-0.0250414	#NUM!
sp|P51692|STA5B_HUMANSignaltransducerandactivatoroftranscription5BOS=HomosapiensGN=STAT5BPE=1SV=2;tr|K7EIF9|K7EIF9_HUMANSignaltransducerandactivatoroftranscription5A(Fragment)OS=HomosapiensGN=STAT5APE=1SV=2;tr|K7EK35|K7EK35_HUMANSignaltransducerandactivatoroftranscriptionOS=HomosapiensGN=STAT5APE=1SV=1;sp|P42229|STA5A_HUMANSignaltransducerandactivatoroftranscription5AOS=HomosapiensGN=STAT5APE=1SV…	1	1	1	5979800	1	1	1	5785000	1	1	-0.0267314	#NUM!
sp|Q08380|LG3BP_HUMANGalectin-3-bindingproteinOS=HomosapiensGN=LGALS3BPPE=1SV=1;tr|K7ESM3|K7ESM3_HUMANGalectin-3-bindingprotein(Fragment)OS=HomosapiensGN=LGALS3BPPE=1SV=1;tr|K7EKQ5|K7EKQ5_HUMANGalectin-3-bindingproteinOS=HomosapiensGN=LGALS3BPPE=1SV=1;tr|K7EP36|K7EP36_HUMANGalectin-3-bindingprotein(Fragment)OS=HomosapiensGN=LGALS3BPPE=1SV=1;tr|K7EJY8|K7EJY8_HUMANGalectin-3-bindingprotein(Fragment…	54403000	120910000	62452000	99700000	33594000	23594000	54719000	33258000	60786000	202040000	-0.245469	#NUM!
sp|Q16555|DPYL2_HUMANDihydropyrimidinase-relatedprotein2OS=HomosapiensGN=DPYSL2PE=1SV=1;tr|A0A1C7CYX9|A0A1C7CYX9_HUMANDihydropyrimidinase-relatedprotein2OS=HomosapiensGN=DPYSL2PE=1SV=1;tr|E5RFU4|E5RFU4_HUMANDihydropyrimidinase-relatedprotein2(Fragment)OS=HomosapiensGN=DPYSL2PE=1SV=1;tr|E9PD68|E9PD68_HUMANDihydropyrimidinase-relatedprotein1OS=HomosapiensGN=CRMP1PE=1SV=1;sp|Q14194|DPYL1_HUMANDihydr…	1	86624000	1942200	27338000	1	19065000	47864000	12981000	33040000	4572300	-0.373895	#NUM!
tr|D6RHD7|D6RHD7_HUMANCalcyphosin-likeproteinOS=HomosapiensGN=CAPSLPE=1SV=1;tr|D6RF97|D6RF97_HUMANCalcyphosin-likeprotein(Fragment)OS=HomosapiensGN=CAPSLPE=1SV=1;sp|Q8WWF8|CAPSL_HUMANCalcyphosin-likeproteinOS=HomosapiensGN=CAPSLPE=2SV=4	1	1	1	1711400	1	1	1744500	1	1	1	0.0181176	0.960133
sp|Q9Y624|JAM1_HUMANJunctionaladhesionmoleculeAOS=HomosapiensGN=F11RPE=1SV=1;tr|A0A087WY82|A0A087WY82_HUMANJunctionaladhesionmoleculeAOS=HomosapiensGN=F11RPE=1SV=1	18704000	15217000	1	21976000	1	14484000	1	23032000	8478600	9735800	0.0331536	0.927102
sp|P01008|ANT3_HUMANAntithrombin-IIIOS=HomosapiensGN=SERPINC1PE=1SV=1;tr|Q8TCE1|Q8TCE1_HUMANAntithrombin-IIIOS=HomosapiensGN=SERPINC1PE=1SV=1;CON__P41361	44381000	125070000	280530000	34856000	1	26730000	14190000	41999000	147590000	255580000	-0.498163	#NUM!
sp|P13797|PLST_HUMANPlastin-3OS=HomosapiensGN=PLS3PE=1SV=4;tr|A0A0A0MSQ0|A0A0A0MSQ0_HUMANPlastin-3OS=HomosapiensGN=PLS3PE=1SV=1;tr|U3KQI3|U3KQI3_HUMANPlastin-3(Fragment)OS=HomosapiensGN=PLS3PE=1SV=1;tr|F2Z2Z9|F2Z2Z9_HUMANPlastin-3OS=HomosapiensGN=PLS3PE=1SV=1	1	8643000	1	4966800	1	1	1	1	13600000	1	-0.170846	#NUM!

## Sheet: CorrelationSig
Significantly Correlated Proteins extracted from Tab1 (correlationall)	CF Group2	CF Group 2	CF group 2	CF Group 2	CF Group 2	Con Group2	Con Group2	Con Group2	Con Group2	Con Group2	Pearson with Il-8	P value pearson
sp|Q9BXR0|TGT_HUMANQueuinetRNA-ribosyltransferasecatalyticsubunit1OS=HomosapiensGN=QTRT1PE=1SV=3	5087800	1	1	2332700	8362000	2068800	1	1	1	723400	0.94017	1.46063e-05
sp|Q9NTJ5|SAC1_HUMANPhosphatidylinositidephosphataseSAC1OS=HomosapiensGN=SACM1LPE=1SV=2;tr|F8WCQ2|F8WCQ2_HUMANPhosphatidylinositidephosphataseSAC1OS=HomosapiensGN=SACM1LPE=1SV=1;tr|C9JV50|C9JV50_HUMANPhosphatidylinositidephosphataseSAC1(Fragment)OS=HomosapiensGN=SACM1LPE=1SV=1;tr|E9PGZ4|E9PGZ4_HUMANPhosphatidylinositidephosphataseSAC1OS=HomosapiensGN=SACM1LPE=1SV=1	3458400	1	1	3766400	5244100	1	1	2087300	1176600	1	0.881146	0.00036241
tr|C9J0K6|C9J0K6_HUMANSorcinOS=HomosapiensGN=SRIPE=1SV=1;sp|P30626|SORCN_HUMANSorcinOS=HomosapiensGN=SRIPE=1SV=1;tr|B4DHQ6|B4DHQ6_HUMANSorcinOS=HomosapiensGN=SRIPE=1SV=1	63385000	33432000	6470500	21216000	74830000	32395000	18410000	12675000	17596000	23553000	0.879393	0.000387429
sp|P28066|PSA5_HUMANProteasomesubunitalphatype-5OS=HomosapiensGN=PSMA5PE=1SV=3	108040000	34121000	27233000	25030000	74645000	1	1	1	23181000	1	0.865136	0.000642968
sp|Q92930|RAB8B_HUMANRas-relatedproteinRab-8BOS=HomosapiensGN=RAB8BPE=1SV=2;tr|H0YNE9|H0YNE9_HUMANRas-relatedproteinRab-8B(Fragment)OS=HomosapiensGN=RAB8BPE=1SV=1	4735400	3169300	1797200	3884100	7629800	2239300	1	1	3823400	2572600	0.835356	0.00156595
tr|E7EQG2|E7EQG2_HUMANEukaryoticinitiationfactor4A-IIOS=HomosapiensGN=EIF4A2PE=1SV=1;sp|Q14240|IF4A2_HUMANEukaryoticinitiationfactor4A-IIOS=HomosapiensGN=EIF4A2PE=1SV=2;tr|J3KSN7|J3KSN7_HUMANEukaryoticinitiationfactor4A-II(Fragment)OS=HomosapiensGN=EIF4A2PE=1SV=1;tr|J3KT04|J3KT04_HUMANEukaryoticinitiationfactor4A-I(Fragment)OS=HomosapiensGN=EIF4A1PE=1SV=1;tr|J3KS93|J3KS93_HUMANEukaryoticinitiatio…	12362000	6514600	1	12552000	35339000	8936900	1	1	12741000	1	0.82346	0.00212734
sp|P62328|TYB4_HUMANThymosinbeta-4OS=HomosapiensGN=TMSB4XPE=1SV=2	37212000	17082000	25152000	30149000	89153000	1	1	18491000	1	1	0.821924	0.00220941
sp|P07237|PDIA1_HUMANProteindisulfide-isomeraseOS=HomosapiensGN=P4HBPE=1SV=3;tr|H7BZ94|H7BZ94_HUMANProteindisulfide-isomeraseOS=HomosapiensGN=P4HBPE=1SV=2;tr|H0Y3Z3|H0Y3Z3_HUMANProteindisulfide-isomerase(Fragment)OS=HomosapiensGN=P4HBPE=1SV=1;tr|I3L0S0|I3L0S0_HUMANProteindisulfide-isomerase(Fragment)OS=HomosapiensGN=P4HBPE=1SV=1;tr|I3L398|I3L398_HUMANProteindisulfide-isomerase(Fragment)OS=Homosap…	148280000	56845000	6296000	41507000	114960000	20385000	1	71756000	13046000	1	0.813363	0.00271061
tr|A0A1W2PRZ7|A0A1W2PRZ7_HUMANHeterogeneousnuclearribonucleoproteinU(Fragment)OS=HomosapiensGN=HNRNPUPE=1SV=1;tr|A0A1W2PQ74|A0A1W2PQ74_HUMANHeterogeneousnuclearribonucleoproteinUOS=HomosapiensGN=HNRNPUPE=1SV=1;tr|A0A1W2PQL0|A0A1W2PQL0_HUMANHeterogeneousnuclearribonucleoproteinU(Fragment)OS=HomosapiensGN=HNRNPUPE=1SV=1;tr|A0A1W2PP34|A0A1W2PP34_HUMANHeterogeneousnuclearribonucleoproteinUOS=Homosapi…	40402000	10968000	15755000	15385000	48124000	34882000	1	8411800	16343000	4827800	0.801391	0.00354609
sp|P49257|LMAN1_HUMANProteinERGIC-53OS=HomosapiensGN=LMAN1PE=1SV=2	27649000	18486000	1	24980000	14546000	1	1	1	1678800	1	0.756024	0.00847401
tr|Q5T0I0|Q5T0I0_HUMANGelsolin(Fragment)OS=HomosapiensGN=GSNPE=1SV=1	13797000	17422000	8911500	27084000	95440000	1	1	4406200	1	1	0.751604	0.00913046
sp|Q86X76|NIT1_HUMANNitrilasehomolog1OS=HomosapiensGN=NIT1PE=1SV=2	8039400	6877700	1	1	22401000	1	1	2545800	3019700	1	0.74614	0.00999146
sp|Q6PIU2|NCEH1_HUMANNeutralcholesterolesterhydrolase1OS=HomosapiensGN=NCEH1PE=1SV=3;tr|A0A0R4J2G3|A0A0R4J2G3_HUMANArylacetamidedeacetylase-like1OS=HomosapiensGN=NCEH1PE=1SV=1;tr|A0A0A0MTJ9|A0A0A0MTJ9_HUMANNeutralcholesterolesterhydrolase1OS=HomosapiensGN=NCEH1PE=1SV=1;tr|H7C046|H7C046_HUMANNeutralcholesterolesterhydrolase1(Fragment)OS=HomosapiensGN=NCEH1PE=1SV=1	20226000	35901000	1	31217000	45447000	5135500	1	1	1	1	0.726781	0.0135094
sp|O00148|DX39A_HUMANATP-dependentRNAhelicaseDDX39AOS=HomosapiensGN=DDX39APE=1SV=2;sp|Q13838|DX39B_HUMANSpliceosomeRNAhelicaseDDX39BOS=HomosapiensGN=DDX39BPE=1SV=1;tr|F6S4E6|F6S4E6_HUMANSpliceosomeRNAhelicaseDDX39B(Fragment)OS=HomosapiensGN=DDX39BPE=1SV=1;tr|A0A0A0MT12|A0A0A0MT12_HUMANSpliceosomeRNAhelicaseDDX39B(Fragment)OS=HomosapiensGN=DDX39BPE=1SV=6;tr|F6TRA5|F6TRA5_HUMANSpliceosomeRNAhelicas…	14605000	10627000	7748300	14392000	50387000	1	3978600	14046000	16642000	4682700	0.719617	0.0150083
sp|Q8TCJ2|STT3B_HUMANDolichyl-diphosphooligosaccharide--proteinglycosyltransferasesubunitSTT3BOS=HomosapiensGN=STT3BPE=1SV=1	8048200	8411600	1	14981000	9308100	1701900	1	1	1	1	0.714043	0.0162528
tr|H7C1M3|H7C1M3_HUMANMatrixmetalloproteinase(Fragment)OS=HomosapiensGN=MMP8PE=1SV=1;sp|P22894|MMP8_HUMANNeutrophilcollagenaseOS=HomosapiensGN=MMP8PE=1SV=1	2574300	1	1	1	21585000	1	1398400	1	1	1	0.708885	0.0174672
sp|P25789|PSA4_HUMANProteasomesubunitalphatype-4OS=HomosapiensGN=PSMA4PE=1SV=1;tr|H0YLS6|H0YLS6_HUMANProteasomesubunitalphatypeOS=HomosapiensGN=PSMA4PE=1SV=1;tr|H0YLC2|H0YLC2_HUMANProteasomesubunitalphatypeOS=HomosapiensGN=PSMA4PE=1SV=1;tr|H0YMI6|H0YMI6_HUMANProteasomesubunitalphatype(Fragment)OS=HomosapiensGN=PSMA4PE=1SV=1;tr|H0YMA1|H0YMA1_HUMANProteasomesubunitalphatype(Fragment)OS=HomosapiensG…	19140000	10410000	2610600	15458000	11917000	16713000	1	1	1643300	1	0.697718	0.0203111
sp|P27797|CALR_HUMANCalreticulinOS=HomosapiensGN=CALRPE=1SV=1;tr|K7EJB9|K7EJB9_HUMANCalreticulin(Fragment)OS=HomosapiensGN=CALRPE=1SV=1;tr|K7EL50|K7EL50_HUMANCalreticulin(Fragment)OS=HomosapiensGN=CALRPE=1SV=1	222980000	56278000	12693000	359120000	112220000	1	1	2593300	4169300	1	0.693936	0.0213431
sp|Q00653|NFKB2_HUMANNuclearfactorNF-kappa-Bp100subunitOS=HomosapiensGN=NFKB2PE=1SV=4	1	1	1	9409600	36324000	1	1	3598700	1	1	0.68174	0.0249179
sp|O75947|ATP5H_HUMANATPsynthasesubunitd,mitochondrialOS=HomosapiensGN=ATP5HPE=1SV=3;tr|F5H608|F5H608_HUMANATPsynthasesubunitd,mitochondrialOS=HomosapiensGN=ATP5HPE=1SV=2	4296300	1	1	14799000	7557700	1	3133900	1	1	1	0.655988	0.0337775
sp|O75923|DYSF_HUMANDysferlinOS=HomosapiensGN=DYSFPE=1SV=1	16858000	4360400	1	2422000	20651000	1	1	1	1	383770	0.773736	0.00617936
sp|P80511|S10AC_HUMANProteinS100-A12OS=HomosapiensGN=S100A12PE=1SV=2	94423000	29744000	248830000	28495000	4043200000	1	6919900	31412000	17870000	1	0.647903	0.036948
tr|H3BRG4|H3BRG4_HUMANCytochromeb-c1complexsubunit2,mitochondrialOS=HomosapiensGN=UQCRC2PE=1SV=1;sp|P22695|QCR2_HUMANCytochromeb-c1complexsubunit2,mitochondrialOS=HomosapiensGN=UQCRC2PE=1SV=3	5511100	4336500	1	11707000	6243600	1	1	3607800	2334800	1	0.645199	0.0380517
sp|P27824|CALX_HUMANCalnexinOS=HomosapiensGN=CANXPE=1SV=2;tr|H0Y9Q7|H0Y9Q7_HUMANCalnexin(Fragment)OS=HomosapiensGN=CANXPE=1SV=1;tr|D6RAU8|D6RAU8_HUMANCalnexin(Fragment)OS=HomosapiensGN=CANXPE=1SV=1;tr|D6RB85|D6RB85_HUMANCalnexin(Fragment)OS=HomosapiensGN=CANXPE=1SV=1;tr|D6RDP7|D6RDP7_HUMANCalnexin(Fragment)OS=HomosapiensGN=CANXPE=1SV=1;tr|D6RGY2|D6RGY2_HUMANCalnexin(Fragment)OS=HomosapiensGN=CANX…	19341000	71584000	9666500	148350000	245540000	1	1	76274000	10601000	1	0.643098	0.0389245
sp|P51857|AK1D1_HUMAN3-oxo-5-beta-steroid4-dehydrogenaseOS=HomosapiensGN=AKR1D1PE=1SV=1	1	1	1	1	90830000	1	1	5216300	1	1	0.632677	0.0434521
tr|Q5TEC6|Q5TEC6_HUMANHistoneH3OS=HomosapiensGN=HIST2H3PS2PE=1SV=1	465360000	108300000	25914000	277910000	22830000	1	1	18645000	1	1	0.631181	0.0441296
sp|P08246|ELNE_HUMANNeutrophilelastaseOS=HomosapiensGN=ELANEPE=1SV=1	199040000	196890000	24918000	134700000	3014100000	1934300	1	767570000	1	1	0.619856	0.0494882
sp|O94804|STK10_HUMANSerine/threonine-proteinkinase10OS=HomosapiensGN=STK10PE=1SV=1;tr|H0YB71|H0YB71_HUMANSerine/threonine-proteinkinase10(Fragment)OS=HomosapiensGN=STK10PE=1SV=1	9205400	8133200	1	10471000	25403000	8935200	1	15981000	5650800	1	0.634579	0.0426006
tr|K7EJ28|K7EJ28_HUMANTumornecrosisfactorligandsuperfamilymember13OS=HomosapiensGN=TNFSF13PE=3SV=1;tr|C9JFN2|C9JFN2_HUMANTumornecrosisfactorligandsuperfamilymember13(Fragment)OS=HomosapiensGN=TNFSF13PE=3SV=1;tr|C9JF68|C9JF68_HUMANTumornecrosisfactorligandsuperfamilymember13(Fragment)OS=HomosapiensGN=TNFSF13PE=3SV=1;tr|Q2QBA2|Q2QBA2_HUMANTumornecrosisfactor(Ligand)superfamilymember13transcriptvari…	3160000	1	1	1	5971900	1	1	1	4873100	1	0.653654	0.0346733
